# Supplementary material
Source: Copernicus journal article supplement (doi:10.5194/egusphere-2026-1317)
Supplement: Supplementary file [file 1 Andrade_1997.pdf › BilbiografiaEscaneada/1 Andrade_1997.pdf]



# VII CONGRESO NACIONAL DE HIDRAULICA

13-14 y 15 de noviembre de 1997

ASOCIACION ECUATORIANA DE HIDRAULICA  
ESCUELA POLITECNICA NACIONAL  
ESCUELA POLITECNICA DEL EJERCITO  
UNIVERSIDAD CENTRAL DEL ECUADOR

**memorias**

## UTILIZACION DE MODELOS PRECIPITACION - ESCURRIMIENTO VENTAJAS Y LIMITACIONES

Dr. Ing. Laureano Andrade, Chávez

ESCUELA POLITECNICA NACIONAL

DEPARTAMENTO DE HIDRAULICA Y RECURSOS HIDRICOS

### RESUMEN

La creciente demanda de agua en el Ecuador exige el conocimiento del régimen hidrológico de zonas con insuficiente y frecuentemente, con ausencia total de información hidrometeorológica básica, como son: cuencas de drenaje de áreas menores a 50 km<sup>2</sup>, páramos, laderas exteriores de la cordillera de los Andes y la llanura amazónica. Por ello, cada vez en mayor grado se recurre a la utilización de modelos hidrológicos que permiten la generación de información indirecta, pero ¿cual es la confiabilidad de los resultados generados? En este trabajo se analiza este tema respecto al cálculo de los caudales máximos, sobre la base de casos concretos de estudio.

### ABSTRACT

The growing demand of water in Ecuador requires the knowledge of the hydrological characteristics of zones with insufficient and very often, with a total lack of basic hydrometeorological information as there are: catchments with drainage areas less than 50 km<sup>2</sup>, páramos, exterior slopes of the Andes mountain chain and the Amazon basin. Therefore, hydrological models that permit the generation of indirect information are being used more and more. The question is: What is the reliability of the generated results? In this work, this theme is being analyzed with respect to the calculation of maximum floods, based on concrete case studies.

### 1. INTRODUCCION

El notable incremento de la demanda del agua en el país por el crecimiento de la población urbana que requiere servicios, y por la incorporación de más áreas bajo riego, crea la necesidad de ampliar los sistemas de aprovechamiento hídrico a cuencas hidrográficas cada vez más alejadas de los centros urbanos; por lo general con menor disponibilidad de información hidrometeorológica básica.

Las cuencas altas del callejón interandino, las laderas orientales y occidentales y la llanura amazónica, son ahora objeto de interés como zonas productoras de agua. Esta situación justificada, debería concomitantemente motivar la inversión pública y privada en el monitoreo de los cuerpos hídricos y del clima de éstas áreas, aspecto que no se refleja en la realidad, con pocas excepciones.

Por otra parte, el cambio en el uso del suelo y las derivaciones legales o furtivas dificultan notablemente la determinación de caudales medios y mínimos. En muchos casos, incluso la información hidrométrica histórica disponible es inconsistente debido a las causas señaladas, es decir: las condiciones de drenaje anteriores y los usos del agua en las cuencas, no corresponden a la situación actual.

Si el uso del suelo de una parte importante de una cuenca de drenaje ha sido cambiado, por ejemplo, de bosque natural de mediana calidad a pastizales, es de esperarse, siempre en relación con la condición anterior, y ante una invariante condición pluvial: menores volúmenes de infiltración, mayores coeficientes de escurrimiento de caudales máximos, ocurrencia de crecidas de mayor magnitud relativa, el gradual decrecimiento de los niveles freáticos y por consiguiente menores caudales mínimos. En resumen: crecidas más severas y estiajes críticos. Aspectos que se pueden evaluar, por ejemplo analizando las formas de las curvas de duración general o comparando los hidrogramas anuales.

Lo expuesto justifica plenamente la utilización de modelos matemáticos, que tratan de representar los distintos procesos hidrológicos que tienen lugar en la cuenca de drenaje. Una vez calibrados y validados estos modelos permiten generar información hidrológica útil para apreciar la respuesta de las cuencas hidrográficas ante situaciones como: variaciones en el régimen climático y modificaciones en el uso del suelo. Es decir, los

modelos matemáticos constituyen una herramienta poderosa, tal vez al momento la única, para obtener escenarios hidrológicos posibles y críticos y apreciar el comportamiento futuro de las cuencas hidrográficas bajo presión antrópica, incluso en condiciones aún anteriores al inicio de las alteraciones mismas.

La utilización de modelos hidrológicos con el objeto de generar información hidrológica directa de cuencas hidrográficas con insuficiencia o ausencia de información (que imposibilita la calibración y validación de parámetros asumidos) es una aventura. Cabe mencionar que son escasas las experiencias nacionales y regionales sobre generalización de parámetros hidrológicos; por ejemplo: regionalización de exponentes y/o coeficientes de hidrogramas unitarios.

Cabe mencionar que los procesos hidrológicos han sido deficientemente estudiados en el medio; es incipiente el análisis de las lluvias medias e intensas en las zonas altas, laderas exteriores de los Andes y llanura amazónica; similar es la situación en relación con procesos como la evaporación e infiltración en áreas saturadas (pantanosas) y con déficit de humedad. En consecuencia, la calidad y cantidad de información constituyen serios limitantes para el planeamiento y diseño racional de obras hidráulicas.

En este trabajo se analiza las ventajas y limitaciones de la aplicación de los modelos hidrológicos y la incertidumbre asociada, en función de experiencias hidrológicas nacionales.

Son objetivos de este trabajo evaluar la información básica disponible, analizar los métodos y técnicas de cálculo más difundidos en la práctica ingenieril nacional y presentar las conclusiones y correspondientes pertinentes.

La obtención de parámetros hidrológicos que representen a los procesos correspondientes, depende: de la disponibilidad y calidad de la información hidrométrica histórica básica, de la selección adecuada de técnicas y métodos de cálculo y también de disponer de experiencias sistematizadas en el medio.

## 2. DISPONIBILIDAD DE INFORMACION

En resumen la información hidrológica requerida para soportar estudios de planeamiento y diseño de obras hidráulicas puede clasificarse en: caudales medios y mínimos, como información

continúa; y, caudales máximos o datos referidos a eventos. Además de la información temática (erosión, producción y transporte de sedimentos).

La información hidrometeorológica disponible varía ampliamente en calidad y cantidad en el país. Sin embargo, son deficitarios los registros hidrométricos de cuencas hidrográficas menores a 50 km<sup>2</sup>, particularmente de zonas de páramo, localizadas por sobre los 3.000 m de altitud y de la llanura amazónica.

Para que la información pluvial sea representativa del correspondiente régimen de una cuenca de drenaje de altura es necesario que la correspondiente estación se localice en el centro de gravedad de la misma; en ciertos casos esta condición exige datos de estaciones situadas por sobre los 3.000 m de altura.

La distribución de las estaciones meteorológicas con la altitud de la zona sur ecuatoriano (territorio asumido por el autor, por debajo del paralelo 3° de latitud sur entre los límites de nuestro país), se presenta en el cuadro adjunto.

**Distribución altitudinal de las estaciones meteorológicas y áreas correspondientes en el sur ecuatoriano**

| Característica                          | Altitud (msnm) |           |           |       |       |
|-----------------------------------------|----------------|-----------|-----------|-------|-------|
|                                         | <1000          | 1000-2000 | 2000-3000 | >3000 | Total |
| Porcentaje de estaciones meteorológicas | 33             | 37        | 27        | 3     | 100   |
| Porcentaje de área                      | 23             | 39        | 28        | 10    | 100   |

Si bien, para esta zona del país se puede observar cierta correspondencia entre el número relativo de estaciones con el área hasta los 3000 msnm; por sobre esta cota, apenas el 3% de estaciones se distribuyen en el 10% del área total.

Tomando al azar el anuario meteorológico de 1977 del INAMHI, se aprecia a nivel nacional, que sobre los 3500 msnm, apenas se disponen: 1 estación climatológica y 5 estaciones pluviométricas.

Por lo expuesto, la información histórica es deficitaria a nivel nacional para apreciar la naturaleza de los fenómenos analizados.

Sin embargo el desarrollo del país exige más y más proyectos hidráulicos, generalmente a filo de agua (en los cuales la disponibilidad de agua depende de las variaciones del caudal).

La situación es crítica si se considera que la red de estaciones hidrométricas y climatológicas, en lugar de ampliarse, se ha reducido junto con la frecuencia de las observaciones y aforos: la generación de información hidrometeorológica en la actualidad es senciblemente menor a la década pasada.

La heterogeneidad de la información hidrometeorológica es otro aspecto que debe ser tomado en consideración. Es decir, como se expuso antes, el cambio en el uso del suelo incide directamente en la calidad de los datos; las series estadísticas se vuelven entonces inconsistentes y por consiguiente los valores obtenidos deben ser analizados en mayor detalle. Por lo expuesto, toma cada vez mayor importancia la evaluación de la confiabilidad de los datos. Un procedimiento válido es el análisis comparativo de los coeficientes de variación y asimetría de las series y también el análisis de errores. El error de los caudales, por ejemplo, puede determinarse con la expresión <sup>2</sup>:

$$Se = Cv / n^{0.5} * 100$$

En donde:

Se - error del valor medio (%)

Cv - Coeficiente de variación de la serie (sin unidades)

N - Número de elementos de la serie.

Es lógico anotar que la confiabilidad de la información analizada de forma concreta es función de la longitud de la serie (número de años de observación) y de su dispersión, evaluada a través del coeficiente de variación. Por tanto, mientras mayor es el coeficiente de variación de la serie, mayor es el número de años de observación que se requiere para mantener el error en niveles aceptables. Este concepto es válido para el análisis de confiabilidad de cualquier variable hidrológica o meteorológica.

Disponer de un error menor al 15 % en el valor medio de una serie de caudales máximos instantáneos, como rango aceptable, no es frecuente en el país. Sin embargo, se incluye en calidad de ejemplo los datos relativos a los caudales máximos instantáneos de la estación río Coca en San Rafael, información incluida en la referencia <sup>1</sup>:

|                                       |                          |
|---------------------------------------|--------------------------|
| Caudal medio máximo instantáneo       | = 2462 m <sup>3</sup> /s |
| Coefficiente de variación de la serie | = 0.31                   |
| Número de elementos de la serie       | = 16                     |
| Error del valor medio (Se)            | = 7.7 %                  |

Por tanto el error de la media de los caudales máximos instantáneos está en el rango de los valores estadísticamente aceptables (Se < 15 %).

### 3. ANALISIS CRITICO DE LOS METODOS DE CALCULO DE CAUDALES MAXIMOS

La determinación de caudales máximos es de vital importancia para la operación normal de obras hidráulicas como: defensa de bocatomas, vertederos de excedencias, alcantarillas para la protección de conducciones, etc. Esto demanda el conocimiento de los caudales pico en unos casos, mientras que en otros se requiere la forma de las crecidas, para evaluar el tránsito y laminación de las mismas.

#### El método racional

El método de mayor uso en el país es sin duda, el conocido como método racional, cuya principal ventaja es la simplicidad en su utilización y depender apenas de 2 parámetros, además obviamente, del área de la cuenca.

Las asunciones de este método, que generalmente constan en la literatura especializada, (por ejemplo en la referencia <sup>4</sup>), son:

- La superficie de la cuenca es el área que drena o tributa hasta el punto de interés.
- La intensidad de lluvia debe ser escogida para una duración de tormenta igual al tiempo de concentración, con periodo de retorno asignado.
- La intensidad de lluvia será invariante durante el tiempo igual al tiempo de concentración.
- La frecuencia del caudal pico es la misma frecuencia de la intensidad media de la tormenta (equivalente a asumir que los periodos de retorno son iguales).



Las limitaciones físicas de este procedimiento están implícitas en las asunciones de su empleo.

- La máxima tasa de escurrimiento alcanza el valor máximo en el tiempo igual al tiempo de concentración. Esto significa que el tiempo al caudal pico es igual al tiempo de concentración.
- El método no responde adecuadamente si la intensidad de lluvia es variable en el tiempo.
- No considera directamente la posibilidad de incorporar la condición de humedad antecedente en el ecuacionamiento.
- La intensidad media utilizada en el método puede no tener una relación secuencial en el tiempo con el patrón de lluvias durante la tormenta. Es decir la curva intensidad-duración-frecuencia empleada en el método no es en la realidad una función de distribución de la lluvia en el tiempo.
- Si un sistema es diseñado usando el método racional es difícil el análisis lógico de modificaciones.

Las limitaciones del procedimiento se traducen en la recomendación de empleo solamente en áreas de hasta 200 ha<sup>s</sup> (otros autores establecen diferentes límites de aplicación). Es decir, implícitamente se indica que es válido solamente para tormentas de corta duración.

El coeficiente de escurrimiento es el método racional debe entenderse como la relación entre la intensidad máxima de escurrimiento, correspondiente al caudal máximo, y la intensidad media de la lluvia, con la misma probabilidad de ocurrencia durante el tiempo de concentración. Se asume que durante el evento analizado se mantiene el balance hídrico de la cuenca. Este coeficiente de escurrimiento, conceptualmente es distinto, al coeficiente de escurrimiento asociado a hidrogramas de crecidas y más aún a caudales medios o mínimos.

En calidad de ejemplo se considera la siguiente situación. Dada una cuenca de drenaje con los siguientes datos:

|                              |                        |
|------------------------------|------------------------|
| Area de drenaje              | = 3.65 km <sup>2</sup> |
| Longitud del cauce           | = 2.75 km              |
| Pendiente media de la cuenca | = 9.1 %                |
| Tiempo de concentración      | = 22 minutos           |
| Periodo de retorno           | = 10 años              |

|                                |            |
|--------------------------------|------------|
| Intensidad de lluvia           | = 100 mm/h |
| Número de curva medio NC (II)  | = 79       |
| Numero de curva medio NC (III) | = 89       |

Las características principales del hidrograma sintético deducido, aplicando: cálculo de las pérdidas = SCS; hidrograma unitario = triangular, son:

|                                  |                          |
|----------------------------------|--------------------------|
| Caudal pico                      | = 31.1 m <sup>3</sup> /s |
| Tiempo al pico                   | = 0.6 horas              |
| Volumen de escurrimiento directo | = 82198 m <sup>3</sup>   |

La relación entre la lámina de lluvia efectiva y la lluvia total en este caso es igual a 0.63. Este valor debe ser entendido como coeficiente de escurrimiento entre volúmenes.

El coeficiente de escurrimiento correspondiente a la formula racional, con los datos de este ejemplo, conocidos el caudal pico y la intensidad de lluvia, es igual a 0.24, valor mucho menor a 0.63.

Por otra parte, la insuficiencia de información pluviográfica, aspecto analizado en el numeral 3, exige la utilización de estudios de intensidades máximas del INAMHI, basados en conceptos de generalización de las relaciones intensidad - duración - frecuencia en el tiempo y en el espacio. Cabe anotar que base de estos estudios es la correlación entre lluvias máximas de 24 horas con lluvias de corta duración; sin embargo esta dependencia, en dos casos concretos analizados (Quito-Observatorio y Guayaquil-Aeropuerto) no se pudo demostrar, más aún los coeficientes de correlación resultaron muy bajos, como se menciona en <sup>6</sup>.

La escasa disponibilidad de información pluviográfica en varias zonas del país impide el conocimiento del régimen de lluvias. De evaluaciones realizadas surgen algunas conclusiones preliminares: el crecimiento de las lluvias mensuales y anuales con la altitud no justifica necesariamente un incremento (menos aún proporcional) de las intensidades de lluvia respectivas; aspecto que puede incidir en la sobreestimación de los caudales máximos.

El periodo de retorno, numéricamente inverso a la frecuencia de ocurrencia de un evento dado, debe entenderse estrictamente de la siguiente manera:

Si  $T_r$  = período de retorno en años correspondiente a una frecuencia dada,  $Q_{tr}$  = caudal máximo respectivo,  $Q$  = caudal máximo anual cualquiera, y el evento A consiste en el cumplimiento de la desigualdad:  $P(Q_{tr}) = P(Q > Q_{tr})$ ; en  $n$  periodos de  $T_r$  años se espera que el evento A sea excedido o igualado  $n$  veces. Por tanto, puede darse la situación que durante un período de retorno cualquiera el evento A puede ocurrir varias veces, y en otros períodos de retorno no ocurrir. Se puede fácilmente deducir también que la probabilidad de ocurrencia del evento A durante el período de retorno es  $0.63^n$ . Esta condición se cumple mejor si  $N \gg n$ .

La selección adecuada del coeficiente de escurrimiento es un aspecto de primera importancia. Se disponen de ecuaciones y tablas que consideran varios factores, como son: número de curva, pendiente de la cuenca, intensidad de lluvia, período de retorno y porcentaje de suelo impermeable, que se puede obtener en las referencias " y ".

#### Modelos estadístico - probabilísticos.

La utilización de estos procedimientos requiere disponer de: registros limnigráficos de varios años, sección de aforos hidráulicamente estable, adecuado número de aforos, que garanticen la correcta extrapolación de la curva de descarga.

Las principales ventajas de la aplicación constituyen la buena confiabilidad de resultados y la simplicidad del procedimiento.

La desventaja fundamental radica en que los requerimientos de información son difíciles de cumplirse en varias zonas del país y principalmente en cuencas de microescala.

En condiciones de cambios notables en el uso del suelo es de esperar un sensible incremento en la dispersión de los valores de la serie de caudales máximos anuales y por ende en sus parámetros estadísticos.

Otro aspecto que debe ser considerado es el error que se asume al establecer la función de distribución para la interpolación y extrapolación de probabilidades. La distribución de Gumbel es muy restrictiva en la aplicación, pues presenta asimetría fija:  $C_s=0.14$ . Se debe entonces escoger adecuadamente la función de distribución; se recomienda aquellas funciones conocidas como de

tres parámetros: Pearson Tipo III (Gamma de 3 parámetros), Log-Pearson Tipo III, Weibull, etc.

El procedimiento de cálculo de caudales máximos de forma detallada se encuentra en la referencia <sup>10</sup>.

#### Regionalización hidrológica

Existen varias posibilidades <sup>11</sup>:

- Regionalización de los parámetros de las distribuciones estadísticas de probabilidades de caudales máximos.
- Regionalización directa del caudal máximo con probabilidad asignada en forma de relaciones: caudal específico vs. altitud media de la cuenca, caudal específico vs. área de la cuenca de drenaje.
- Regionalización del tipo de función de distribución aplicable.

La aplicación de esta metodología exige información procesada y detallada de varias cuencas de drenaje de la región, y la verificación de la homogeneidad de las características físico-climáticas condicionantes del fenómeno.

Ventajas: alta confiabilidad; cálculos válidos para diseño.

Desventajas: condiciones difíciles de cumplirse en la realidad; insuficiencia de información para cuencas de drenaje de micro escala. Las áreas montañosas tienen alta variabilidad en las condiciones climáticas y físicas de las cuencas, por lo cual se presentan dispersiones no justificadas estadísticamente. Este procedimiento en detalle, con aplicaciones en el medio nacional, se encuentra en la referencia <sup>12</sup>.

Se está ampliando el uso de curvas de abatimiento del caudal específico máximo con el área de la cuenca. Se debe cuidar de que el rango de utilización de las relaciones deducidas concuerden con el rango de áreas de las cuencas de drenaje utilizadas como información fuente.

Es muy importante preservar la representatividad de las características físico - climáticas en este tipo de métodos. Por ello, se debe poner especial cuidado en el traspaso de caudales

de la estación fuente con área de drenaje de mesoescala a la sección de interés o destino con área de aporte de microescala, o al contrario.

#### Hidrogramas deducidos y sintéticos.

Demanda disponer de información pluviográfica y limnigráfica directa de buena calidad para calibrar los resultados.

Ventaja: procedimiento ampliamente aceptado en la práctica ingenieril en los niveles de diseño.

Desventajas: exige alta calidad de información de lluvias, es decir disponer de una red adecuada de estaciones pluviográficas en la cuenca de drenaje, con lo cual se puede deducir las relaciones intensidad - duración - frecuencia, patrones de tormenta, coeficientes de abatimiento de las lluvias intensas, hidrogramas registrados, confiables curvas de descarga.

Hidrogramas deducidos son utilizados con frecuencia en el diseño de aliviaderos de grandes presas. En el Ecuador se ha aplicado este procedimiento en el caso de los proyectos: Paute, Agoyán, Daule - Peripa, etc.

La aplicación de hidrogramas sintéticos en condiciones de déficit o ausencia de información exige amplio conocimiento del modelo a adoptarse y particularmente la variación de los parámetros (análisis de sensibilidad).

La información físico-geográfica puede ser obtenida sin mayor dificultad, no así los datos de lluvias intensas y su distribución en el tiempo y en el espacio.

Ante la imposibilidad real de calibrar eventos lluvia-escorrentamiento, surge la alternativa de una validación cualitativa de los resultados contrastando los caudales picos con período de retorno asignados, obtenidos por métodos estadístico - probabilísticos en una sección aguas abajo (por ejemplo a mesoescala), con los caudales máximos generados mediante la aplicación de hidrogramas sintéticos a microescala e integrados mediante tránsito hidrológico hasta la estación de validación.

Este procedimiento se adopta en el problema de determinación de caudales máximos para el proyecto de riego Carrizal - Chone, cuyos resultados se incluyen en el siguiente cuadro <sup>13</sup>.

Caudales máximos - Río Carrizal en Calceta

| Período de retorno<br>(años) | Caudales calculados (*)<br>(m <sup>3</sup> /s) | Caudales modelados (**)<br>(m <sup>3</sup> /s) |
|------------------------------|------------------------------------------------|------------------------------------------------|
| 5                            | 268                                            | 224                                            |
| 10                           | 301                                            | 285                                            |
| 25                           | 343                                            | 347                                            |
| 50                           | 374                                            | 399                                            |
| 100                          | 405                                            | 442                                            |

\* Caudales máximos obtenidos en base a registros históricos.

\*\* Caudales máximos generados mediante integración y tránsito de hidrogramas sintéticos deducidos a microescala.

#### 4. CONCLUSIONES Y RECOMENDACIONES

- Los modelos hidrológicos constituyen una herramienta valiosa para la planificación del uso del agua, temas de manejo de cuencas hidrográficas y fases iniciales de proyectos de obras hidráulicas. Sin embargo, la utilización de estos métodos a nivel de diseño requiere el adecuado conocimiento de: la base matemática, los requerimientos de datos, las limitaciones (principalmente del rango de aplicación) y de la sensibilidad de los parámetros.
- En insuficiencia o ausencia de información básica, que impida cumplir la fase de calibración y validación, siempre es necesario realizar cálculos con al menos dos procedimientos independientes. El contraste y análisis crítico de resultados es necesario.
- La aplicación del método racional, como modelo más difundido en el medio tiene serias restricción de aplicación, principalmente en relación con el área de drenaje y cuencas con fuertes pendientes y onduladas.
- Es necesario impulsar investigaciones hidrológicas a nivel de cuencas de microescala. Esta información es muy necesaria para la validación de los parámetros de modelos.

- Se requiere impulsar la conformación de una base de datos hidrométricos de cuencas de microescala a nivel nacional y regional y también la sistematización de experiencias de aplicación de modelos hidrológicos en pequeñas cuencas de drenaje.
- La aplicación de modelos hidrológicos es una necesidad creciente, sin embargo no es correcto aspirar a que el dato sintético remplace al histórico.

### Bibliografía

- <sup>1</sup> Andrade, Laureano. El proyecto Paute y su problema hidrometeorológico. Revista Politécnica. Volumen XVII, No. 3. Quito, 1992.
- <sup>2</sup> Vladimirov A.M. Cálculos Hidrológicos. Gidrometeoizdat. San Petersburgo, 1990. (en ruso).
- <sup>3</sup> INECEL y Asociación de Firms Consultoras. Proyecto Hidroeléctrico Coca – Codo Sinclair. 1992.
- <sup>4</sup> Singh V. Hydrologic Systems. Volume I, Rainfall – Runoff Modelling. Prentice Hall. New Jersey, 1988.
- <sup>5</sup> Tucci Carlos. Hidrología – Ciencia y Aplicación. EDUSP. Sao Paulo, 1993
- <sup>6</sup> Andrade Laureano, Beltrán Franklin. Características Selectas de las Lluvias Intensas de Quito. Memorias – XVIII Congreso Latinoamericano de Hidráulica. Guayaquil, 1996.
- <sup>7</sup> Stephenson D. Stormwater Hydrology and Drainage. Elsevier, 1981.
- <sup>8</sup> Viessman W., Knapp J. Introduction to Hydrology. Harper – Row, 1984.
- <sup>9</sup> Chow V.T., Maidment D., Mays L. Applied Hydrology. Mc. Graw – Hill, 1988
- <sup>10</sup> Andrade Laureano, Villacís Oscar. Análisis de Frecuencias de Caudales Máximos. Serie de Instrutivos Detallados de Cálculo No. 7. INE-EPN. 1986.
- <sup>11</sup> Misma referencia 5.
- <sup>12</sup> Andrade Laureano y otros. Investigación de Variables Hidrológicas en Cuencas Vertientes Representativas con fines de Desarrollo Agrícola. EPN – CONUEP – INAMHI, 1992.
- <sup>13</sup> Proyecto de Riego y Drenaje Carrizal-Chone. Actualización de Estudios de Factibilidad – Hidrología. ASOCIACION: TAMS – POST BUCKLEY – PLATEC, 1996.

## IMPACTO DEL FENOMENO ENSO EN LOS RECURSOS HÍDRICOS DEL ECUADOR

Frédéric ROSSET.

ORSTOM BP 5045  
34032 Montpellier-France  
Fax (0033) 4.67.54.71.06  
Email: [rosset@mnet.fr](mailto:rosset@mnet.fr)

Eric CADIER

ORSTOM Apartado 1711-6596  
Quito-Ecuador  
Fax (005932) 569-396  
Email: [cadier@pi.pro.ec](mailto:cadier@pi.pro.ec)

Carlos LUGO

INAMHI Iñaquito 700 y Correa  
Quito-Ecuador  
Fax (005932) 469-934  
Email: [inamhi@uicenet.ec](mailto:inamhi@uicenet.ec)

Gustavo GOMEZ

INAMHI Iñaquito 700 y Correa  
Quito-Ecuador  
Fax: (005932) 469-934  
Email: [inamhi@uicenet.ec](mailto:inamhi@uicenet.ec)

### Resumen

El clima de la zona costera ecuatoriana está fuertemente influenciado por el ENSO. Después de tener delimitada su influencia, ponemos primeramente en evidencia correlaciones significativas ( $R > 0,7$ ) entre las anomalías de la Temperatura de Superficie del Mar (TSM), de vientos en el Océano y aquellas de la pluviometría en la zona costera. Utilizamos luego estos estudios para poder elaborar un método de previsión de las anomalías pluviométricas con un mes de anticipación.

**Palabras claves:** ENSO, Ecuador, precipitaciones, previsión de precipitaciones

### Abstract

Climate in the Ecuadorian coastal zone is highly influenced by the El Niño Southern Oscillation. After having determined its influence upon the precipitations, a significant correlation ( $R > 0,7$ ) between sea surface temperature anomalies (SST or TSM), ocean winds and pluviometry in the coastal zone is shown. A prevision method to determine pluviometric anomalies with one month in advance is finally proposed.

**Key words:** ENSO, Ecuador, precipitation, prevision of precipitation

### Resume

Le climat de la zone côtière équatorienne est fortement influencé par l'ENSO. Après avoir délimité l'influence de l'ENSO, sur les précipitations, on met en évidence des corrélations significatives ( $R > 0,7$ ) entre les anomalies de la Température de Surface de la Mer (TSM), du vent sur l'océan et celles de la pluviométrie sur la zone côtière. On utilise ensuite ces études pour mettre au point une méthode de prévision des anomalies pluviométriques un mois à l'avance.

**Mots clefs:** ENSO, Equateur, précipitation, prévision des précipitations
