# Supplementary material
Source: Copernicus journal article supplement (doi:10.5194/egusphere-2026-1317)
Supplement: Supplementary file [file 2 Beltran 1995.pdf › BilbiografiaEscaneada/2 Beltran 1995.pdf]

ESCUELA POLITECNICA NACIONAL  
*FACULTAD DE INGENIERIA CIVIL*

TESIS PREVIA A LA OBTENCION DEL TITULO DE  
INGENIERO CIVIL  
ESPECIALIZACION HIDRAULICA

INVESTIGACION DE HIETOGRAMAS CRITICOS  
Y EVALUACION DEL EFECTO DE  
SIMULTANEIDAD DE TORMENTAS EN QUITO

BELTRAN VEGA FRANKLIN APARICIO

FEBRERO - 1995

QUITO - ECUADOR



ESCUELA POLITECNICA NACIONAL  
FACULTAD DE INGENIERIA CIVIL

TESIS PREVIA A LA OBTENCION DEL TITULO  
DE INGENIERO CIVIL  
ESPECIALIZACION HIDRAULICA

INVESTIGACION DE HIETOGRAMAS CRITICOS Y EVALUACION  
DEL EFECTO DE SIMULTANEIDAD DE TORMENTAS EN QUITO

BELTRAN VEGA FRANKLIN APARICIO

Quito, Febrero de 1995

## C E R T I F I C A C I O N

Certificamos que la presente Tesis fue  
realizada por el Sr. Franklin Aparicio  
Beltrán Vega.



Dr. Laureano Andrade  
DIRECTOR DE TESIS



Ing. Othón Zevallos  
ASISTENTE DE DIRECCION  
DE TESIS

Ing. Marcelo Hidalgo  
ASISTENTE DE DIRECCION  
DE TESIS

**D E D I C A T O R I A**

**A mis Padres, a mis Hermanas**

**Aquí su esfuerzo.**

## A G R A D E C I M I E N T O

A todas las personas que de una u otra manera  
han permitido el desarrollo y culminación de  
este trabajo de investigación

T E M A R I O   D E   T E S I S  
A P R O B A D O

"Investigación de Hietogramas Críticos y Evaluación del  
Efecto de Simultaneidad de Tormentas en Quito"

I.    GENERALIDADES

- 1.1    Antecedentes
- 1.2    Justificación
- 1.3    Caracterización climática de la Hoya de Quito

II.   ASPECTOS METODOLOGICOS E INFORMACION BASICA

- 2.1    Conceptos básicos y variables de interés
- 2.2    Técnicas de evaluación de patrones de tormentas
- 2.3    Metodología de trabajo
- 2.4    Consistencia de la información básica y conformación de la base de datos

III.   HIETOGRAMAS CRITICOS

- 3.1    Análisis de frecuencias de duración de las tormentas
- 3.2    Relaciones intensidad - duración características
- 3.3    Determinación de hietogramas críticos con probabilidad asignada y relación con las curvas de Huff

IV.   DINAMICA DE LAS TORMENTAS

- 4.1    Trayectorias y velocidades medias principales
- 4.2    Reducción de las intensidades de lluvia del centro de la tormenta a la periferie (curvas área - intensidad)
- 4.3    Variación de las intensidades de lluvia críticas en relación con el avance de la frontera urbana

V.    CONCLUSIONES Y RECOMENDACIONES

ANEXOS

## R E S U M E N

Esta tesis trata sobre el estudio y determinación de tormentas y sus variables para las condiciones físico-climáticas de la Hoya de Quito. Utiliza una amplia base de datos pluviográficos de la estación Climatológica Quito-Observatorio (1915 - 1992), y además otras estaciones localizadas en la Hoya.

Presenta un diagnóstico de las direcciones de las tormentas, incluyendo un análisis de la frecuencia de este fenómeno. Trata del crecimiento de la intensidad de la tormenta con el aumento del área de cobertura de lluvia, en función de la duración de la misma.

Posibilita la aplicación práctica con datos de la realidad física del país de hidrogramas para la determinación de caudales máximos.

# I N D I C E      G E N E R A L

| CAPITULO   | I   | GENERALIDADES                                                                                       | Página |
|------------|-----|-----------------------------------------------------------------------------------------------------|--------|
| I.1.       |     | Antecedentes                                                                                        | 1      |
| I.2.       |     | Objetivos                                                                                           | 5      |
| I.2.1.     |     | Justificación                                                                                       | 6      |
| I.3.       |     | Características Físicas y Climáticas de la Hoya de Quito                                            | 8      |
| I.3.1.     |     | Ubicación de la zona de estudio                                                                     | 8      |
| I.3.2.     |     | Características Físicas                                                                             | 9      |
| I.3.3.     |     | Clima                                                                                               | 11     |
| I.3.4.     |     | Sistema hidrográfico                                                                                | 13     |
| <br>       |     |                                                                                                     |        |
| CAPITULO   | II  | ASPECTOS METODOLOGICOS E INFORMACION BASICA                                                         |        |
| II.1.      |     | Conceptos básicos y variables de interés                                                            | 14     |
| II.2.      |     | Técnicas de evaluación de patrones de tormenta                                                      | 18     |
| II.3.      |     | Metodología de trabajo                                                                              | 26     |
| II.3.1.    |     | Selección de estaciones existentes en la Hoya de Quito                                              | 27     |
| II.4.      |     | Consistencia de la Información básica y conformación de la base de datos                            | 29     |
| II.4.1.    |     | Criterios para la selección de tormentas                                                            | 29     |
| II.4.2.    |     | Datos de base                                                                                       | 30     |
| <br>       |     |                                                                                                     |        |
| CAPITULO   | III | HIETOGRAMAS CRITICOS                                                                                |        |
| III.1.     |     | Análisis de frecuencias de la duración de tormenta                                                  | 32     |
| III.1.1.   |     | Estudio estadístico                                                                                 | 34     |
| III.1.1.1. |     | Estudio descriptivo                                                                                 | 34     |
| III.1.1.2. |     | Estudio inferencial                                                                                 | 35     |
| III.1.1.3. |     | Comparación de las distribuciones teóricas con la distribución empírica                             | 40     |
| III.2.     |     | Relación Intensidad-Duración características                                                        | 43     |
| III.3.     |     | Determinación de hietogramas críticos con probabilidad asignada y relación con las curvas de Huff   | 48     |
| III.3.1.   |     | Abstracciones iniciales igual a cero                                                                | 49     |
| III.3.2.   |     | Considerando abstracciones Iniciales igual a media Pulgada(12.7 mm.)                                | 57     |
| III.3.3.   |     | Considerando abstracciones Iniciales igual a una Pulgada(25.4 mm.)                                  | 58     |
| III.3.4.   |     | Comparación del peso del cuartil en función del intervalo de duración y las abstracciones iniciales | 60     |



## CAPITULO IV      DINAMICA DE LAS TORMENTAS

|           |                                                                                                  |    |
|-----------|--------------------------------------------------------------------------------------------------|----|
| IV.1.     | Trayectoria y velocidades medias principales                                                     | 63 |
| IV.1.1.   | Comportamiento de las tormentas                                                                  | 63 |
| IV.1.1.a. | Nubes térmicas y convectivas                                                                     | 63 |
| IV.1.1.b. | Convección en aire claro                                                                         | 64 |
| IV.1.1.c. | Convección en aire Húmedo                                                                        | 66 |
| IV.1.1.d. | Tormentas de origen orográfico                                                                   | 68 |
| IV.1.1.e. | Teoría columnar de las tormentas                                                                 | 69 |
| IV.1.2.   | Movimiento de tormentas                                                                          | 71 |
| IV.1.3.   | Estaciones utilizadas y selección de tormentas                                                   | 74 |
| IV.1.4.   | Análisis de movimientos principales                                                              | 78 |
| IV.1.5.   | Análisis particular de los movimientos principales                                               | 86 |
| IV.1.5.a. | Dirección principal de tormenta N°1                                                              | 86 |
| IV.1.5.b. | Dirección principal de tormenta N°2                                                              | 87 |
| IV.1.5.c. | Dirección principal de tormenta N°3                                                              | 88 |
| IV.1.5.d. | Dirección principal de tormenta N°4                                                              | 89 |
| IV.2.     | Reducción de la intensidad de lluvia del centro de la tormenta hacia la periferie                | 94 |
| IV.3.     | Variación de las intensidades de lluvia críticas en relación con el avance de la frontera urbana | 99 |

## V.                    CONCLUSIONES Y RECOMENDACIONES

|      |                 |     |
|------|-----------------|-----|
| V.1. | Conclusiones    | 105 |
| V.2. | Recomendaciones | 107 |

|                            |     |
|----------------------------|-----|
| Bibliografía               | 108 |
| Referencias Bibliográficas | 110 |

## ANEXOS

|          |                                                                                                                   |     |
|----------|-------------------------------------------------------------------------------------------------------------------|-----|
| Anexo 1. | Datos de forma de la curva pluviográfica                                                                          | 112 |
| Anexo 2. | Datos de máximas intensidades para diferentes duraciones                                                          | 138 |
| Anexo 3. | Programa Computacional HIET10.BAS                                                                                 | 140 |
| Anexo 4. | Tormentas clasificadas según las Direcciones Principales de Tormenta (DPT.)                                       | 152 |
| Anexo 5. | Tormentas estudiadas para la obtención de la curva "Porcentaje de precipitación en función del área de cobertura" | 172 |

# INDICE DE FIGURAS

| Código   |                                                                                            | Página |
|----------|--------------------------------------------------------------------------------------------|--------|
| I.1.     | Método Racional                                                                            | 7      |
| I.2.     | Ubicación de zona de estudio                                                               | 8      |
| I.3.     | Quito y sus alrededores                                                                    | 10     |
| II.1.    | Pluviograma                                                                                | 18     |
| II.2.    | Hietograma Constante                                                                       | 20     |
| II.3.    | Curvas de Huff                                                                             | 22     |
| II.4.    | Hietograma sintético de curva de probabilidad pluviométrica                                | 23     |
| II.5.    | Hietograma Chicago                                                                         | 24     |
| III.1.a. | Densidad empírica de la variable duración de tormenta                                      | 39     |
| III.1.b. | Distribución empírica de la variable duración de tormenta                                  | 39     |
| III.2.   | Comparación de Distribución Teórica Log-Normal y Normal con la Distribución Empírica       | 40     |
| III.3.   | Comparación de Distribución Teórica Gumbel con la Distribución Empírica                    | 41     |
| III.4.   | Comparación de Distribución Teórica Pearson con la Distribución Empírica                   | 42     |
| III.5.   | Curva Intensidad Duración                                                                  | 45     |
| III.6.   | Curvas Intensidad - Duración y Precipitación - Duración                                    | 45     |
| III.7.   | Curvas Intensidad-Duración para todas las estaciones estudiadas                            | 46     |
| III.8.   | Peso del cuartil en función del intervalo de duración                                      | 61     |
| III.9.   | Peso del cuartil en función del porcentaje de abstracciones iniciales                      | 62     |
| IV.1.    | Método de las tres estaciones                                                              | 73     |
| IV.2.    | Ubicación de las estaciones                                                                | 75     |
| IV.3.    | Pluviograma de tormenta(1987-05-22)                                                        | 78     |
| IV.4.    | Dirección principal de tormenta N° 1                                                       | 90     |
| IV.5.    | Dirección principal de tormenta N° 2                                                       | 91     |
| IV.6.    | Dirección principal de tormenta N° 3                                                       | 92     |
| IV.7.    | Dirección principal de tormenta N° 4                                                       | 93     |
| IV.8.a.  | Area de cobertura en función del porcentaje de precipitación medio (1982-12-07)            | 96     |
| IV.8.b.  | Area de cobertura en función del porcentaje de precipitación medio (1982-11-19)            | 96     |
| IV.8.c.  | Area de cobertura en función del porcentaje de precipitación medio (1982-10-04)            | 97     |
| IV.8.d.  | Area de cobertura en función del porcentaje de precipitación medio (1982-09-19)            | 97     |
| IV.9.    | Comparación de Curvas Area - % de Precipitación                                            | 98     |
| IV.10.a. | Intensidades máximas para duraciones $\geq 30$ min.                                        | 101    |
| IV.10.b. | Intensidades máximas para duraciones $\leq 20$ min.                                        | 102    |
| IV.11.   | Tendencia de intensidades máximas para duración igual a 30 min.                            | 102    |
| IV.12.   | Tendencia de intensidades máximas anuales para duraciones menores a 12 horas               | 103    |
| IV.13.   | Tendencia de intensidades máximas anuales (dur=30 min.) y tendencia del crecimiento urbano | 103    |



# INDICE DE CUADROS

| Código  |                                                                                                                          | Página |
|---------|--------------------------------------------------------------------------------------------------------------------------|--------|
| II.1.   | Grupo de suelos hidrológicos                                                                                             | 16     |
| II.2.   | Estaciones Pluviográficas Principales en la Hoya de Quito                                                                | 28     |
| III.1.  | Ajustes logarítmicos de la duración para las estaciones en estudio                                                       | 46     |
| III.2.  | Número de días con precipitación en diferentes estaciones (año 1993)                                                     | 47     |
| III.3.  | Frecuencia del cuartil para duraciones menores                                                                           | 52     |
| III.4.  | Frecuencia del cuartil para duraciones medias                                                                            | 52     |
| III.5.  | Frecuencia del cuartil para duraciones altas                                                                             | 56     |
| III.6.  | Frecuencia del cuartil para el rango de duraciones completo                                                              | 56     |
| III.7.  | Frecuencia del cuartil para el rango de duraciones completo y considerando abstracciones iniciales igual a media pulgada | 59     |
| III.8.  | Frecuencia del cuartil para el rango de duraciones completo y considerando abstracciones iniciales igual a una pulgada   | 59     |
| III.9.  | Resumen de los principales resultados en referencia a frecuencia del cuartil                                             | 62     |
| IV.1.   | Localización geográfica de las estaciones en estudio                                                                     | 74     |
| IV.2.   | Cálculo de distancia entre estaciones                                                                                    | 76     |
| IV.3.   | Tormentas simultaneas de análisis                                                                                        | 77     |
| IV.4.   | Características Internas de Tormenta (1987-05-22)                                                                        | 79     |
| IV.5.   | Puntos de subfenómenos internos de tormenta (1987-05-22)                                                                 | 79     |
| IV.6.   | Tormentas simultaneas con características parecidas                                                                      | 80     |
| IV.7.a. | Dirección Principal de Tormenta N° 1                                                                                     | 82     |
| IV.7.b. | Dirección Principal de Tormenta N° 2                                                                                     | 82     |
| IV.7.c. | Dirección Principal de Tormenta N° 3                                                                                     | 83     |
| IV.7.d. | Dirección Principal de Tormenta N° 4                                                                                     | 83     |
| IV.8.a. | Cambio del cuartil en DPT(1)                                                                                             | 84     |
| IV.8.b. | Cambio del cuartil en DPT(2)                                                                                             | 84     |
| IV.8.c. | Cambio del cuartil en DPT(3)                                                                                             | 85     |
| IV.8.d. | Cambio del cuartil en DPT(4)                                                                                             | 85     |

## I. GENERALIDADES

### I.1. ANTECEDENTES

La necesidad de estimar caudales de crecida para el diseño de diferentes obras ingenieriles y la falta o insuficiencia de registros hidrométricos han obligado a desarrollar instrumentos teóricos de modelación del proceso precipitación - escorrentía, que permitan obtener los parámetros hidrológicos requeridos de forma indirecta.

Tales instrumentos o modelos, en relación con la determinación de caudales máximos, requieren generalmente de la siguiente información: características físicas del área de drenaje, datos sobre el suelo y su uso e información pluviográfica.

A partir de la información pluviográfica disponible deben obtenerse características tales como: distribuciones probables de las intensidades de lluvias, transformadas a patrones de tormenta.

Como patrón de tormenta, en adelante, debe entenderse la relación funcional entre la intensidad de lluvia y el tiempo; dicho de otra manera, es la distribución con probabilidad asignada de la intensidad de lluvia en el tiempo.

Mientras que el concepto de tormenta de diseño en relación con un cuerpo hídrico y su cuenca de aporte; adicionalmente al patrón de tormenta incluye los siguientes conceptos:

- Duración de tormenta;
- La relación intensidad - duración - frecuencia;
- Distribución areal de la tormenta;
- Variación areal del patrón de tormenta.



Para la generación del hidrograma de diseño y por lo tanto para el cálculo de caudales máximos, la **Duración de tormenta** es muy importante y se selecciona en función del tiempo de concentración de la cuenca de drenaje hasta el sitio de cierre (de proyecto).

Las relaciones **intensidad - duración - frecuencia**, expresadas como CURVAS I-D-F, han sido insuficientemente establecidas en el país, por la escasa o inexistente información pluviográfica, como por la deficiente utilización de la información en el proceso de cálculo.

De esta última apreciación se puede decir lo siguiente:

- Ha existido una indiscriminada utilización de la distribución de probabilidades de Gumbel, que tiene un coeficiente de sesgo fijo ( $C_s = 1.14$ ), en el proceso de determinación de las intensidades de lluvia asignadas a una probabilidad;

- En la utilización de la lluvia máxima de 24 horas para obtener intensidades para duraciones pequeñas; por ejemplo, los coeficientes de correlación entre las intensidades de lluvia de 24 horas y de 30 y 60 minutos para la estación Quito-Observatorio resultaron muy bajos.<sup>1</sup>

El concepto de **distribución areal de la tormenta** se refiere a introducir en la discusión el efecto de la reducción de la intensidad de lluvia con el aumento del área bañada por la tormenta, en términos de una corrección a la intensidad de lluvia mediante un factor que es menor a la unidad.

Pocas investigaciones para el Ecuador en relación con este tema se han realizado, ejemplos en este tema se encuentra en la referencia N° 13 y 6.

Es menester considerar la importancia de introducir en el cálculo el concepto de **variación areal del patrón de tormenta**, pues esta característica en la realidad no es una constante regional, sino que varía sensiblemente en el espacio. En la práctica ingenieril se ha recurrido a simplificar este tema por la insuficiencia de información pluviográfica.

En la práctica nacional se utilizan los patrones de tormenta de Huff, sin que se tenga una certeza en la aplicación por la ausencia de trabajos en el país que validen este procedimiento. Al ser dichos patrones desarrollados para las condiciones climáticas del Este de los Estados Unidos, la aplicación incondicional para el País debe estar siempre sujeta a un proceso de convalidación, pues las tormentas aquí son producto de procesos meteorológicos de tipo convectivo, orográfico y en menor incidencia por formaciones de tipo frontal.

Con las facilidades de aplicaciones en Software de información cartográfica o satelitaria digitalizada para el tratamiento de temas hidrológicos, han tomado impulso los modelos denominados distribuidos que consideran las variables antes detalladas.

La **frecuencia de ocurrencia de la tormenta de diseño** se la asume en consideración del tipo de estructura de diseño; por tanto, las probabilidades asignadas a estructuras menores tales como sistemas de drenaje urbano, son diferentes a las consideradas para estructuras de importancia como son presas de cierre. En general los criterios para escoger la frecuencia parten de las posibles pérdidas que se puedan ocasionar en vidas humanas, o por consideraciones de orden económico. Generalmente, se escogen períodos de retorno entre 2 y 50 años para estructuras

menores.

La variación del patrón de distribución areal toma importancia en el diseño de grandes estructuras cuyo caudal es captado y transitado en áreas de drenaje que incluyen distintas zonas con diferente comportamiento hidrológico, y en relación con la formación de tormentas.

Todas las características antes indicadas son objeto de investigación en esta tesis; sin embargo, dadas las limitaciones de un proyecto de tesis como es el presente caso, se ha concentrado el estudio del patrón de tormentas al caso puntual de Quito Observatorio, en consecuencia no se incluye el análisis de la variación del patrón de distribución areal de las tormentas.

Es menester indicar que la estación Quito-Observatorio ha sido escogida como base para los propósitos de este trabajo, por la disponibilidad de registros históricos suficientemente amplios (desde 1898), con registros continuos diarios desde 1926, y también por la calidad y confiabilidad. Esto garantiza la bondad de los resultados obtenidos, que lógicamente dependen del volumen de información utilizado.

Para el desarrollo de ciertos temas de esta tesis se ha utilizado registros pluviográficos de estaciones vecinas.

Este trabajo constituye un aporte para la ingeniería del país en relación con el tema de tratamiento de información pluviográfica.

Cabe presentar un agradecimiento al Instituto Nacional de Meteorología e Hidrología - INAMHI, por las facilidades brindadas en la obtención de información para el desarrollo de este trabajo, tanto como al Observatorio Astronómico de Quito,

dependencia de la Escuela Politécnica Nacional.

## I.2. OBJETIVOS

La presente tesis tiene como objetivo principal introducir la discusión de este tema en el medio técnico del país. Se demuestra la necesidad de estudiar el comportamiento de las tormentas para su aplicación sobre todo a proyectos de gran importancia. Se pretende proporcionar una metodología para el análisis de tormentas, aplicable a las condiciones climáticas del país, y recomendar un procedimiento de análisis para su ulterior aplicación a otras regiones del país.

Los objetivos secundarios que se pretenden alcanzar son:

- determinar el tipo de hietograma y el patrón de tormenta aplicable a la ciudad de Quito;
- evaluar el cambio del patrón de tormenta de Quito, en dependencia del avance de la tormenta;
- definir las direcciones principales de avance de las tormentas, producto del movimiento de masas de aire húmedo entre las gargantas y barreras orográficas propias de la geografía interandina;
- analizar el cambio de las intensidades máximas registradas para diferentes duraciones en el transcurso del tiempo, en función del avance de la frontera urbana (cambio en el uso del suelo).

### I.2.1. JUSTIFICACION

En general, en la práctica ingenieril nacional se utiliza con exagerada frecuencia la fórmula racional en el cálculo de los caudales máximos; información necesaria en el dimensionamiento de diferentes obras de ingeniería, como son: captaciones, drenaje urbano, puentes, alcantarillas de carreteras, etc. Este procedimiento tiene muchas limitaciones y deficiencias de índole conceptual, que redundan obviamente en los resultados obtenidos.

El método racional:

Incorpora el concepto de tiempo de concentración como elemento constante para cada cuenca hidrográfica, cuando se conoce que es variable, y depende de la velocidad del flujo;

Supone que la precipitación es uniforme en toda la cuenca hidrográfica y cada área infinitesimal de la cuenca aporta de igual forma al caudal máximo;

Asocia el período de retorno de la tormenta con el período de retorno del caudal máximo derivado;

No considera el efecto de reducción areal de la intensidad de la lluvia con el aumento del área; y, tampoco demanda establecer los patrones de tormenta (variaciones de la intensidad de la lluvia con el tiempo);

El coeficiente de escurrimiento no es una constante, usualmente es seleccionado de una lista basada en el grado de impermeabilidad y en la capacidad de infiltración del área de drenaje. Pero el coeficiente de escurrimiento debe conceptualmente variar, ya que éste representa el efecto de numerosas condiciones que definen el hidrograma de crecida; así también, se debe considerar el efecto de humedad antecedente y



la no uniformidad de la lluvia (Fig. I.1.).

Por sobre todas las deficiencias indicadas, el método racional tiene la enorme ventaja de la simplicidad de aplicación, y se recomienda la utilización en cuencas de drenaje pequeñas con áreas de aporte de hasta 200 Ha.<sup>6</sup>

Para los diseños de medianas y grandes estructuras en las cuales el caudal de aporte es consecuencia del escurrimiento de grandes áreas deben ser utilizados técnicas de cálculo que involucren el concepto de hidrogramas; para esto, se requiere mayor volumen de información y más elementos de estudio, entre los cuales reviste especial importancia los patrones de tormenta (hietogramas de lluvia críticos) y los efectos de reducción de la intensidad de la tormenta con el aumento del área de drenaje.

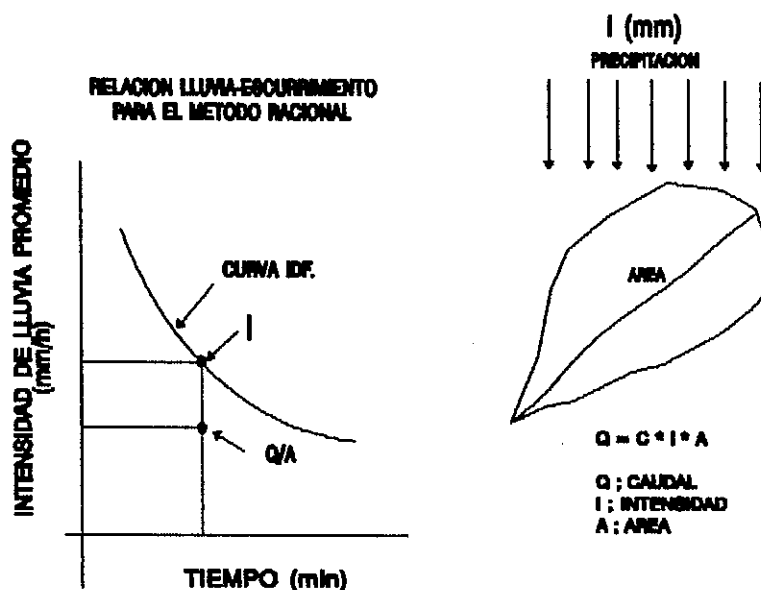

Fig. I.1.

### I.3. CARACTERISTICAS FISICAS Y CLIMATICAS DE LA HOYA DE QUITO

#### I.3.1. UBICACION DE LA ZONA DE ESTUDIO

La ubicación geográfica de la zona de estudio corresponde al área entre las coordenadas  $78^{\circ}27'30''$  -  $78^{\circ}37'30''$  de longitud Oeste y  $00^{\circ}04'00''$  -  $00^{\circ}20'00''$  de latitud Sur. La ubicación dentro del Ecuador se indica en la Fig. I.2.

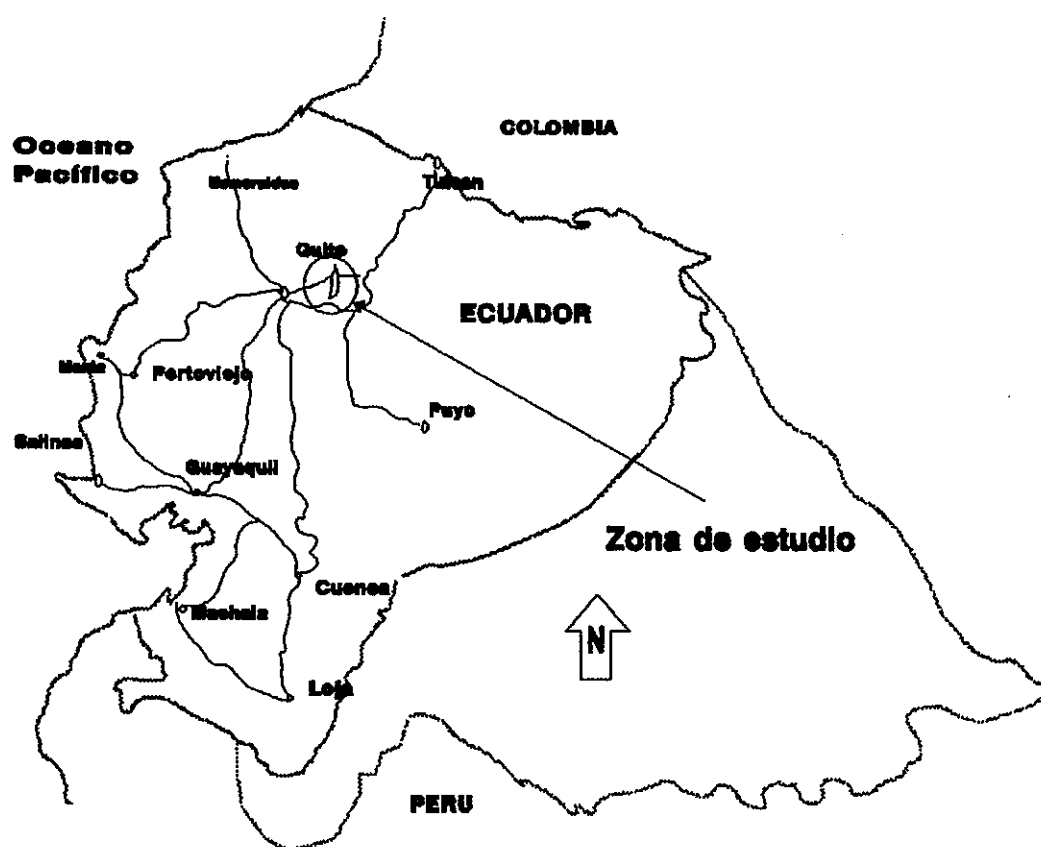

Fig. I.2.

La zona de estudio se encuentra en la Provincia de Pichincha, en la ciudad de Quito, tiene una extensión urbana aproximada de 15000 hectáreas ( $150 \text{ Km}^2$ ). El plan maestro de Quito considera el área metropolitana igual a 115600 Ha ( $1156 \text{ Km}^2$ ), tiene una altura media de 2500 m.s.n.m.

### I.3.2. CARACTERISTICAS FISICAS

La ubicación e implantación de la Ciudad de Quito, en las faldas y estribaciones de la Cordillera Occidental al pie del volcán Pichincha y la presencia en su interior de elevaciones tales como el Panecillo en el centro sur y las lomas del Itchimbia por el Este, definen características topográficas muy irregulares especialmente en la dirección Este - Oeste, con pendientes mayores al 16%. Está limitada por la quebrada del río Machángara al Este; posee numerosas quebradas que cruzan transversalmente la ciudad. En el sentido longitudinal (Norte-Sur) las pendientes son menores llegando hasta un 10 %.

Su longitud urbanizada es mayor a 30 Km, y su ancho varía entre 3 y 5 Km.

Las alturas en que se encuentra la zona urbana de la ciudad fluctúan entre 2800 y 3000 m.s.n.m.

El río Guayllabamba, es el principal sistema hidrográfico, se ubica en la parte Nororiental de la Hoya, sus afluentes escurren por diferentes plataformas bastante regulares; así se tiene, de sur a norte, el Valle de los Chillos a 2400 m.s.n.m., el valle de Tumbaco a 2200 m.s.n.m., la parte extrema oriental de Pifo, Puembo, Yaruquí, El Quinche a 2600 m.s.n.m. y la plataforma del eje noroccidental de Pomasqui - San Antonio a 2600 m.s.n.m.(Fig. I.3.)

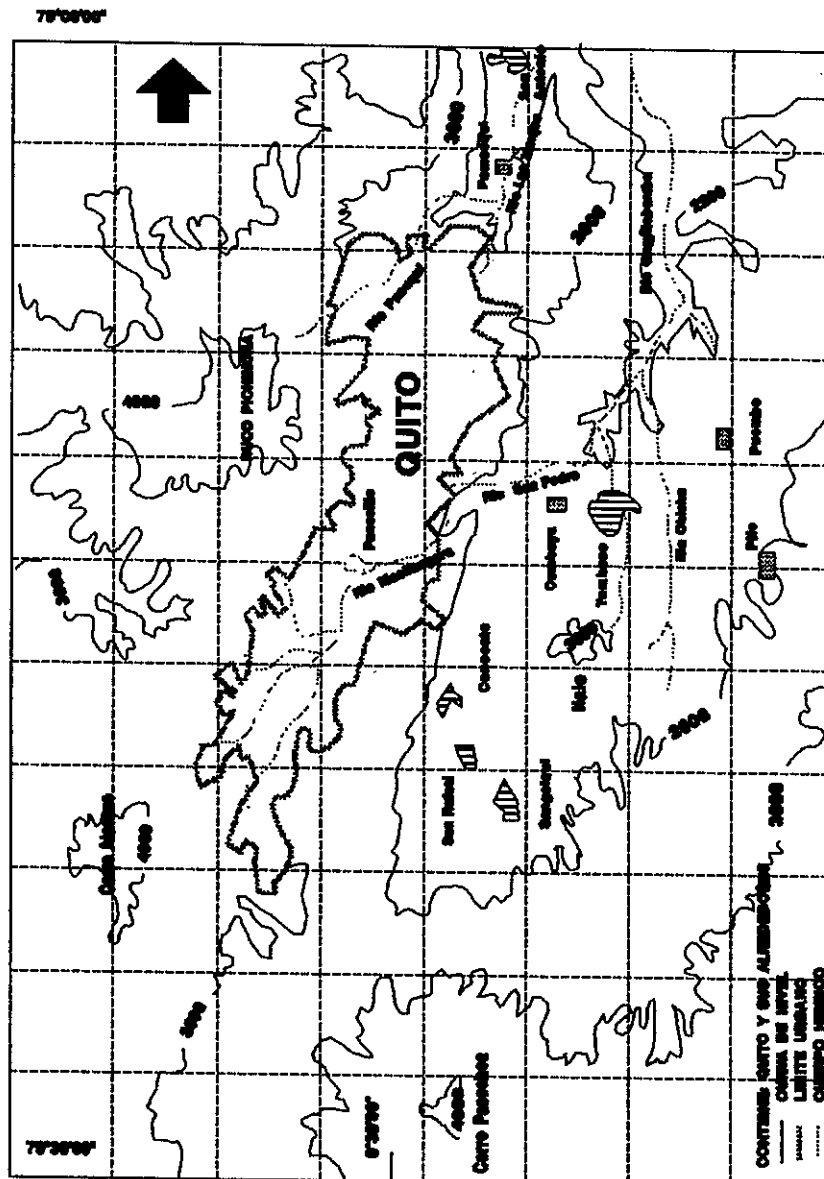

Fig. I.3.

### I.3.3. CLIMA

El Ecuador, está situado en la zona ecuatorial, ésta zona, es una faja que se extiende desde los 10° Norte a los 10° Sur envolviendo la tierra. A la zona ecuatorial convergen los vientos de los hemisferios Norte y Sur, denominados vientos alisios que vienen del Noreste en el Hemisferio Norte y Sureste en el hemisferio Sur.<sup>2</sup>

El fenómeno del niño <sup>de El Niño</sup> es uno de los procesos que caracterizan al clima del Ecuador, denominado de esta manera por que en el mes de diciembre desciende una corriente cálida, desde el Norte siguiendo el contorno costanero occidental sur de los Estados Unidos, hasta buena parte del perfil costanero del Perú. Esta corriente desplaza a la corriente fría de Humboldt, la cual actúa en el perfil occidental del Pacífico Sur, hasta los cabos San Lorenzo y Pasado, donde gira hacia el Oeste, paralela a la línea Ecuatorial, cruzando a través del Archipiélago de Colón. El encuentro de estas dos corrientes provoca su cambio de dirección, existiendo un desplazamiento de las corrientes. El mayor o menor desplazamiento que sufra la corriente fría de Humboldt por parte de la corriente del niño, produce grandes cambios en el clima del país, debido a la gran cantidad de vapor de agua que la corriente cálida arrastra y el mayor desplazamiento hacia el Este de la corriente fría de Humboldt el resultado conduce a fuertes precipitaciones en la zona costanera y una gran influencia de estas en el clima de la región interandina producido por el traspaso de las masas de aire acuosas a través de la cordillera occidental.

J  
MAL.

La cuenca del río Amazonas posee un clima y un régimen



hídrico totalmente independiente de los fenómenos antes citados, esta zona tiene precipitaciones casi permanentes durante gran parte del año y produce sectores de transición cuyos climas son consecuencia de la diferencia entre los inicios y fines de los marcados temporales de invierno entre la costa y el oriente, este es el caso de gargantas y hoyas interandinas como la de Quito.

Los procesos antes citados y los fuertes accidentes topográficos de la Hoya de Quito, han producido un microclima de lo más peculiar. El clima de la ciudad se ha clasificado como templado húmedo con una temperatura promedio anual de 13.1 °C a excepción de algunos valles donde se tienen valores que llegan a los 16 °C. Tiene una precipitación media anual de 1241 mm. Una humedad relativa media anual de 75 %. El clima templado de Quito está rodeado por un clima semihúmedo que corresponde al sector alto que rodea la ciudad, así también un clima templado seco al Noroccidente. Al Este y Sureste se encuentra un clima subtropical lluvioso.

En lo que se refiere a los vientos principales, existen tres direcciones predominantes de vientos: a) La zona Norte con vientos del Noreste. b) La zona central con vientos del Norte. c) la zona Sur con vientos del Noreste, definiendo así una dirección de vientos predominantes de Norte a Sur debido a las características climáticas y a los accidentes geográficos. La frecuencia de los vientos indican que el 49 % de las velocidades son menores que 3 m/s, el 33 % están entre 3 y 6 m/s, el 16 % están entre 6 y 9 m/s y el restante 2 % supera los 9 m/s.<sup>2</sup>

En cuanto a la presión atmosférica, ésta es mínima en el mes de enero llegando a 547.3 mm de Hg. y su máximo en el mes de mayo con un valor de 548.1 mm de Hg.

#### I.3.4. SISTEMA HIDROGRAFICO

El sistema hidrográfico principal corresponde al río Guayllabamba, este atraviesa la hoya en toda su extensión y está conformada por diferentes afluentes como el Pita, Machángara, Chiche, Pisque, Pusuquí, Monjas, San Pedro.

Por los deshielos del Pichincha se ha conformado el río Condor - Huachana, que representa el sistema hidrográfico occidental.

Muchas quebradas existentes en las laderas del Pichincha, desalojan sus caudales a través de colectores que cruzan la ciudad de Quito y descargan al río Machángara o al Pusuquí.

## CAPITULO II

### ASPECTOS METODOLOGICOS E INFORMACION BASICA

#### II.1. CONCEPTOS BASICOS Y VARIABLES DE INTERES

##### CICLO HIDROLOGICO Y BALANCE HIDRICO

El ciclo hidrológico es un proceso continuo resultante de la entrega de energía solar a la superficie del planeta, por éste proceso el agua evaporada es transportada de los océanos a la atmósfera, de la atmósfera a la tierra mediante diferentes formas de precipitación como lluvia, nieve, granizo, rocío, heladas etc. y, de la tierra nuevamente al mar por escurrimiento superficial o subsuperficial.

Existen muchos subciclos, la evaporación del agua en tierras lejanas al mar y su posterior precipitación sobre los suelos antes de regresar a los océanos, es un ejemplo.

El estudio del ciclo hidrológico es complejo y se lo puede analizar en forma particular según el perfil de interés. Para fines prácticos de ingeniería es necesario establecer el Balance Hídrico de un volumen de control (zona de interés).

El balance Hídrico consiste en igualar la masa de agua que ingresa a una cuenca o área de drenaje con la masa de agua que sale de ella o que momentáneamente se retiene. La precipitación en sus diferentes formas constituye la variable hidrológica de ingreso en el balance hídrico.

$$V_a = V_e + dV \quad [1]$$

$V_a$ ; Volumen afluente

$V_e$ ; Volumen efluente

$dV$ ; Pérdidas

## PERDIDAS

Las pérdidas constituyen la cantidad de lluvia que no llega a formar parte del escurrimiento superficial, se presentan de diferentes formas tales como, evaporación, transpiración, retención de la humedad por la vegetación, acumulación de agua en depresiones e infiltración.

Las pérdidas por evaporación y transpiración en relación con una tormenta son pequeñas, se asumen menores a 3 mm/hr. Este fenómeno continúa luego de suspendida la tormenta.

La retención de la humedad por la vegetación varía entre 2 y 10 mm, depende del tipo de vegetación y de la tensión superficial<sup>1</sup>

La acumulación de agua en las depresiones depende de la irregularidad de la superficie, alcanza valores de 10 a 25 mm en superficies con vegetación densa y su destino es evaporarse o infiltrarse.

La acumulación de agua en depresiones superficiales y la retención por vegetación reciben juntas el nombre de abstracciones o retenciones iniciales.<sup>3</sup>

La infiltración es el flujo de agua que ingresa a tierra a través de su superficie, es extremadamente importante no solamente porque aumenta en gran medida las pérdidas, sino también porque produce cambios o atenuaciones del tiempo de escurrimiento superficial.

La infiltración es muy dependiente de las características de la superficie y no solamente del tipo de suelo de las diferentes capas que lo componen. Considerando las diversas combinaciones de suelos y otros factores existentes en la

35  
37  
41  
5 19  
85

naturaleza, es difícil cuantificar relaciones generales. Sin embargo, el Servicio de Conservación de Suelos de los Estados Unidos ha clasificado los suelos en cuatro **grupos hidrológicos** dependientes de la capacidad de infiltración que caracteriza a cada uno de ellos. El cuadro II.1. indica los grupos de suelos hidrológicos y los rangos de infiltración promedio obtenidos:

| Grupo de Suelo<br>Hidrológico | Rango de Infiltración<br>(Plg/hr)    |
|-------------------------------|--------------------------------------|
| A                             | $i > 0.3 \approx 7.5 \text{ mm/h}$   |
| B                             | $0.15 > i > 0.3$                     |
| C                             | $0.05 > i > 0.15$                    |
| D                             | $i < 0.05 \approx 1.25 \text{ mm/h}$ |

Cuadro II.1.

#### MODELOS PRECIPITACION - ESCURRIMIENTO

La aplicación del balance hídrico se refleja en modelos simuladores del proceso precipitación-escorrimento. Estos modelos requieren información de dos tipos, para cada cuenca o área de drenaje; El primero, se refiere, a registros históricos tanto de precipitación como de escurrimiento obtenidos en las respectivas estaciones de medición; y el segundo tipo, consiste en las características físicas propias de la cuenca como son: cobertura vegetal, tipo de suelo, porcentaje de impermeabilidad, características topográficas, etc., éste es el caso del muy difundido método propuesto por el Soil Conservation Service (SCS) o el U.S. Geological Survey (USGS).

Programas computacionales han sido creados para agilizar los



diferentes cálculos, entre estos se puede citar, el HEC1 (Corps), el TR-55 (SCS), el USGS (USGS), HYMQ(ARS), SWMM(EPA), HIDRO-1, etc. Todos éstos, utilizan principalmente las siguientes características en su desarrollo:<sup>4</sup>

- Infiltración y pérdidas: Ecuaciones de Horton, Philips, Holtan, Método del número de curva del SCS etc.
- Hidrogramas Unitarios: Sintéticos, Clark (isocronas), Snyder(provee solamente las características principales del hidrograma).
- Ríos: Métodos hidráulicos, Muskingum, Tatum, Coeficiente de almacenamiento variable
- Reservorios: Movimiento por almacenamiento.
- Flujo base: Valor constante, Ecuaciones de recesión.

## REGISTRO DE TORMENTAS

El registro de tormentas se lo realiza en estaciones según un instrumento que mide la cantidad de precipitación denominado pluviómetro. Si el registro de precipitación es obtenido en una faja de papel continuo en función del tiempo, la estación medidora se denomina pluviográfica.

Los registros pluviográficos (fajas pluviográficas, Fig. II.1.) proporcionan datos de una lluvia o tormenta específica tales como; cantidad e intensidad de lluvia para diferentes intervalos de tiempo, duración de tormenta, distribución en el tiempo. Estos datos, analizados para un período determinado: anual, mensual, diario, etc., han sido utilizados para el desarrollo de tormentas de diseño útiles únicamente en la región de estudio.

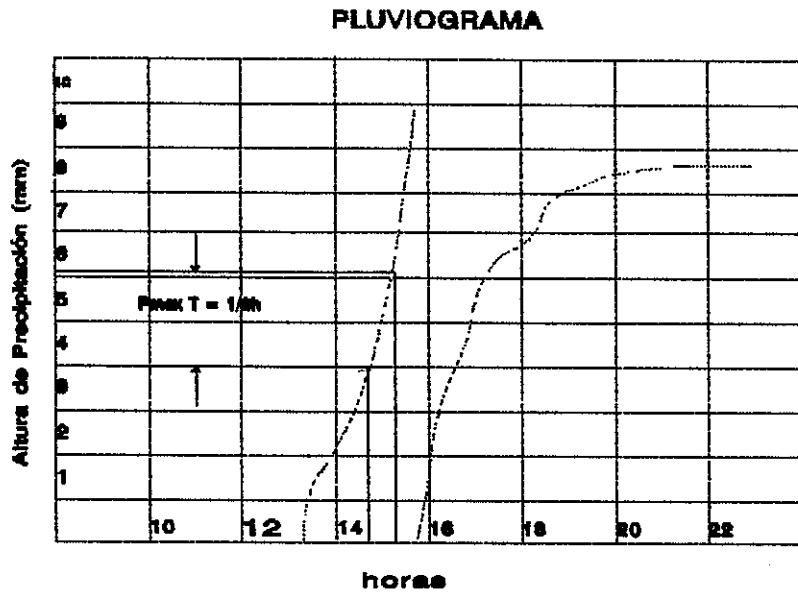

Fig. II.1.

## II.2. TECNICAS DE EVALUACION DE PATRONES DE TORMENTA

### HIETOGRAMAS

Un hietograma, es la representación no acumulada de un evento <sup>de precip. máxima</sup> de tormenta, para su determinación al pluviograma correspondiente se lo divide en intervalos iguales de tiempo.

Un hietograma crítico es el resultado de un análisis de registros de patrones de distribución de tormenta o de la distribución de tormenta peor-posible, está asociado a un nivel de probabilidad dependiente de la estructura de diseño.

Un hietograma de diseño se lo debe entender como la representación de un evento pluviométrico generado sintéticamente con el objetivo de conseguir un funcionamiento correcto o la verificación de cualquier parte de un proyecto de drenaje.

La determinación del hietograma de diseño, es de fundamental

utilidad para la lluvia de diseño, y por lo tanto, para la correcta valoración del caudal de crecida.

Las pérdidas son muy importante para evaluar los caudales máximos, su valoración depende de las características del suelo: tipo de suelo, características topográficas, vegetación, humedad antecedente, aumento de áreas impermeables (ciudades), etc. Al no entrar esta parte de estudio en la presente tesis, se limita las pérdidas a únicamente las abstracciones iniciales, que incluyen; el almacenamiento en depresiones y la intercepción. Para ello, se toma diferentes porcentajes de una cantidad de lluvia igual a 25.4 mm (1 Plg.) sugerida por Huff.<sup>5</sup>

Con motivos de estudio y con el fin de abarcar un amplio rango de abstracciones iniciales, los porcentajes a utilizarse son :

- Abstracciones iniciales iguales a 0 % de 1 Plg.
- Abstracciones iniciales iguales a 50 % de 1 plg. = 14.7 mm
- Abstracciones iniciales iguales a 100 % de 1 plg. = 25.4 mm

## **HIETOGRAMAS UTILIZADOS.**

### **a) Hietograma constante:**

Deducido de la curva de probabilidad pluviométrica, este hietograma considera que la variación de intensidad en el tiempo es constante en toda su duración (Fig. II.2).

Arnell(1982), demostró que el volumen total del evento resulta subestimado respecto al real y en mayor medida para los eventos más breves. Además, la intensidad pico es mayor a la intensidad constante para los eventos reales.

### HIETOGRAMA CONSTANTE

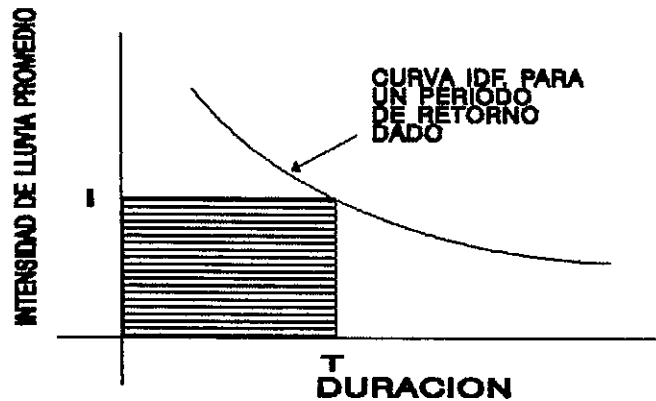

Fig. II.2

#### b) Hietograma Huff.

Este hietograma fue deducido por Huff en 1967 para pequeñas cuencas en el Illinois State Water Survey, fue elaborado en base a información pluviográfica, sin tomar en cuenta los eventos con volumen medio inferior a media pulgada (12.7 mm) y volumen puntual inferior a una pulgada (25.4 mm).

Eventos de tormenta severos, entendiéndose como aquellos en los cuales gran cantidad de lluvia precipita en períodos cortos de tiempo, han sido analizados. Los hietogramas obtenidos fueron clasificados en cuatro grupos, según el cuartil en el que se verifica la intensidad máxima del evento (eventos con períodos secos de 6 horas fueron considerados separadamente). Generalmente se estudia solamente las tormentas del primero y segundo cuartil

que representan las más severas. Tomadas juntas (primero y segundo cuartil), el porcentaje del número total de lluvias registradas representa el 66 %, separadamente ambas tienen la misma probabilidad de ocurrir.

Una distribución con 90 % de probabilidad es aquella que ocurre en el 10 % o menos de las tormentas estudiadas, lo cual las caracteriza como tormentas tranquilas. El 80 % del total de cantidad de lluvia ocurre en el 20 % del tiempo inicial para la distribución del 10 % de probabilidad del primer cuartil; ésta tormenta particular produce grandes intensidades de lluvia y generalmente va acompañada por rayos.

Al interior de cada cuartil, los eventos fueron divididos de acuerdo a la probabilidad relativa de ser superados, las curvas adimensionales propuestas por Huff para los cuatro cuartiles se indican en las Fig. II.3.

La probabilidad total (absoluta) de un evento puede ser deducida, multiplicando la probabilidad de la distribución temporal escogida por la probabilidad del cuartil en que ella se verifica. Por ejemplo, la probabilidad que el pico de intensidad este en el primer cuartil según Huff es del 33 %, la curva con probabilidad 10 % tiene una probabilidad total de  $0.1 * 0.33 = 0.03 = 3.3 \%$ .

Las formas de las curvas con probabilidad de ocurrencia de 10 %, 20 %, 30 % y 40 % son más uniformes que las curvas con probabilidad de 60 %, 70 %, 80 %, 90 %, lo que indica que las curvas más frecuentes tienen una intensidad inicial, la cual va aumentando progresivamente hasta encontrar un máximo, punto en el cual la intensidad va disminuyendo hasta que la tormenta termina. Esto no sucede para las curvas con baja frecuencia de

ocurrencia (Ej. 80 %, 90 %), las cuales tienen una serie de altibajos en la magnitud de la intensidad de tormenta.

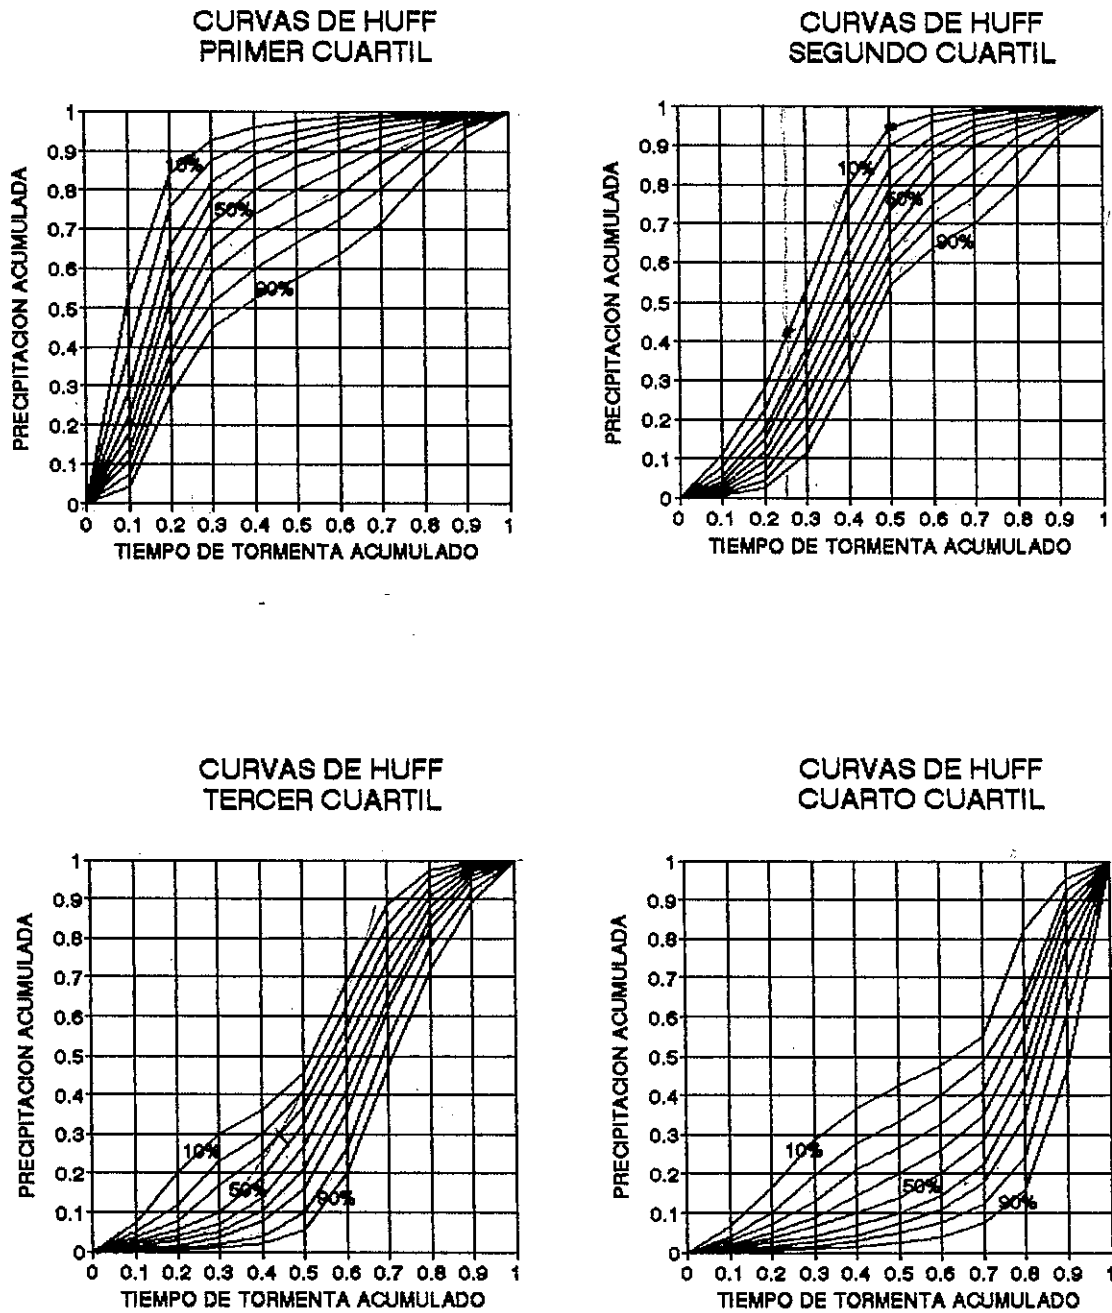

Fig. II.3.

### c) Hietograma Chicago

Desarrollado por Keifer y Chu en 1957 con referencia al alcantarillado de Chicago, este hietograma principalmente se caracteriza por que para cada duración aunque sea parcial, la intensidad media de la precipitación deducida de tal hietograma, es congruente con aquella definida de la curva de probabilidad pluviométrica (Fig. II.4.).

Si a la duración del hietograma indicado  $T$  se lo divide en dos intervalos de tiempo de tal manera que mantengan una relación:

$$T_a = k * T \quad [2]$$

$$T_b = (1-k) * T \quad [3]$$

### HIETOGRAMA SINTETICO GENERADO A PARTIR DE LA CURVA DE PROBABILIDAD PLUVIOMETRICA

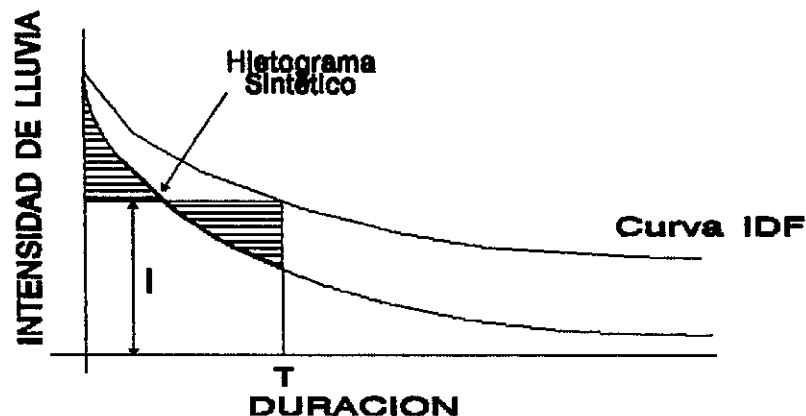

Fig. II.4.

donde;  $0 < k < 1$ ; factor que depende de la región o sector de estudio Ej.  $k = 15/40$  en Chicago. y representa la posición relativa de la intensidad máxima dentro de la duración de tormenta.

$T_a$  ; tiempo entre el inicio de la lluvia y su intensidad máxima.

$T_b$  ; Tiempo entre la intensidad máxima de lluvia y el fin de ella.

Se puede obtener un hietograma compuesto de dos ramas, una ascendente y otra descendente en los que para cada duración de lluvia, la intensidad promedio obtenida es congruente a la intensidad obtenida de las curvas de probabilidad pluviométrica.

El hietograma Chicago ( Fig. II.5.), presenta la ventaja de ser sensible a las variaciones de la duración. Keifer y Chu, escogieron un tiempo de duración de tormenta igual al tiempo de concentración de la red entera ( 180 min <sup>5</sup>)

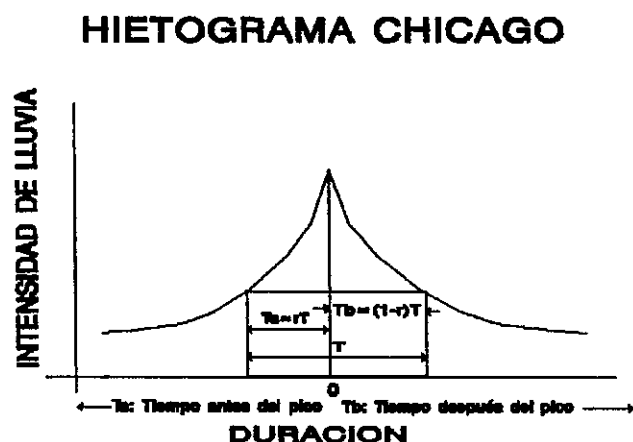

Fig. II.5.



d) Hietograma deducido de la curva Precipitación-Duración-Frecuencia (PDF)

Este tipo de hietograma ha sido utilizado en pocos casos a nivel nacional, y en particular en el estudio de las Laderas del Pichincha citado en la referencia N°6.

Es deducido a partir de una lluvia de 24 horas de duración y una frecuencia o período de retorno determinado. En el caso de insuficiencia de datos en una estación, se utiliza estaciones homogéneas con registros aceptables y se toma en cuenta variaciones, que consideran la diferencia de altura y precipitación media anual.

Basado en los datos obtenidos de curvas precipitación en función del período de retorno, utilizando diferentes distribuciones de probabilidades, como por Ej., Gumbel, utiliza la relación entre la lluvia promedio diaria de período de retorno  $T$  y la lluvia promedio diaria para un período de retorno de 2 años (Gumbel), dicha relación es considerada como estable a escala para todas las estaciones consideradas dentro de una área de características climáticas homogéneas.

Considera además que la relación entre la precipitación de una lluvia de período de retorno  $T$  y duración  $t$ , con la precipitación de una lluvia diaria de igual período de retorno, es muy poco variable en función del período de retorno  $T$ , lo que permite admitir un solo valor de dicha relación asociado a la duración de lluvia  $t$ . Estas relaciones permiten observar el peso de la precipitación de una lluvia de duración  $t$  y período de retorno  $T$  sobre la precipitación diaria para el mismo período de retorno y con esto distribuir dicha precipitación diaria en el

tiempo. Si se considera un porcentaje de la precipitación obtenida para 24 h. como razonable para el diseño, se puede reducir la duración del hietograma de diseño, Ej. 12 horas.<sup>6</sup>

### II.3. METODOLOGIA DE TRABAJO

Una vez revisados los conceptos básicos y las variables de interés, necesarios para la correcta interpretación de los conceptos en forma y contenido, se puede concluir que la tesis propuesta ocupa una fase dentro de los modelos precipitación - escorrentía indicados. Esta fase imprescindible, que es de entrada para cualquier modelo propuesto, es la selección de hietogramas críticos. Con este fin, es necesario el considerar los registros históricos existentes, por lo que se seguirá la siguiente metodología:

1. Análisis y selección de las estaciones existentes en la Hoya de Quito, así como la determinación de la estación con mayor cantidad de años de registro denominada Estación Base.
2. Elaboración de Programas de computación de soporte que agilicen tanto el manejo de datos como su interpretación.
3. Estudio puntual de la Estación Base: Obtención de datos (fajas pluviográficas) de la estación base.  
Estudio de características principales del pluviograma como son: duración, intensidad y su comportamiento (tendencia).
4. Estudio de estaciones secundarias: Obtención de los registros pluviográficos de las estaciones disponibles (denominadas secundarias), correspondientes a las fechas seleccionadas en la estación principal, para un período de

registro representativo y confiable.

Análisis del movimiento entre los patrones internos de tormenta encontrados en los registros simultáneos de las estaciones seleccionadas.

### II.3.1. SELECCION DE ESTACIONES EXISTENTES EN LA HOYA DE QUITO

En el Cuadro II.2., se presenta el listado de estaciones pluviográficas, con registros a nivel diario, más importantes existentes en la Hoya de Quito y que se encuentran bajo la administración de diferentes entidades públicas y privadas.

Debido a la cantidad de registros de eventos de lluvia obtenidos en la estación Quito-Observatorio, ésta será utilizada como estación base. Así, con el fin de que el volumen de datos sea manejable en el presente estudio, se procederá a obtener los registros pluviográficos históricos de 4 tormentas anuales con mayor precipitación en 24 horas, para todo el período de registro.

Para el estudio dinámico de tormentas se ha tomado en cuenta las 4 estaciones pluviográficas que se encuentran bajo la dirección del Instituto Nacional de Meteorología e Hidrología (INAMHI). La estación Izobamba realiza sus observaciones desde el año 1967 en la zona Sur de la ciudad de Quito, la estación Tola ubicada al Oriente de la ciudad, suministra datos desde el año 1980, la estación Chorrera suministra los datos de tormentas de la región Occidental de la ciudad, las mediciones de tormenta en la región Norte de la ciudad son obtenidas de la estación Iñaquito. De ésta forma, las estaciones consideradas en el estudio, abarcan prácticamente toda el área urbana de la ciudad.

Registros cortos pero útiles en este estudio se han conseguido de la estación Aeropuerto, la cual se encuentra bajo la supervisión de la Dirección de Aviación Civil (DAC.)

| N° | ESTACION                                 | ALTITUD<br>(m) | Fecha de<br>inicio de<br>observaciones |
|----|------------------------------------------|----------------|----------------------------------------|
| 1  | El Condado (EMAP-<br>PRONAREG) ①         | 2710           | 1982                                   |
| 2  | Estación la Pulida (EMAP-<br>PRONAREG) ② | 2870           | 1982                                   |
| 3  | Aeropuerto (DAC.)                        | 2810 ①         | 1959                                   |
| 4  | Loma Gorda (EMAP-<br>PRONAREG) ③         | 3020           | 1982                                   |
| 5  | Rumanaccha (EMAP-<br>PRONAREG) ④         | 3000           | 1982                                   |
| 6  | Iñaquito (Bodegas, INAMHI)               | 2810 ⑤         | 1975 /                                 |
| 7  | la Chorrera (INAMHI)                     | 3165 ⑥         | 1977 /                                 |
| 8  | Observatorio (POLITECNICA<br>NACIONAL)   | 2820 ④         | 1898                                   |
| 9  | Izobamba (INAMHI)                        | 3060 ⑤         | 1967 <sup>a</sup> —                    |
| 10 | Tola (Cumbayá, INAMHI)                   | 2480 ①         | 1980 —                                 |
| 11 | H.C.J.B. Antenas. (EMAP-<br>PRONAREG) ②  | 3900           | 1981                                   |
| 12 | Hacienda La<br>Dolorosa (EMAP-PRONAREG)  | 3250           | 1981                                   |

Cuadro II.2

## II.4. CONSISTENCIA DE LA INFORMACION BASICA Y CONFORMACION DE LA BASE DE DATOS

### II.4.1. CRITERIOS PARA LA SELECCION DE TORMENTAS

Es importante que el presente estudio sea libre de problemas que surgan a consecuencia de la selección misma de las tormentas. Se debe notar el hecho que la imprevisión en el almacenamiento de datos puede sesgar los resultados o limitar su uso, así, se sugieren los siguientes criterios para el almacenamiento:

Para las tormentas ya seleccionadas, el inicio de éstas se consideró cuando la intensidad de lluvia haya superado una intensidad igual a 0.5 mm/h y se registre un rápido ascenso de la intensidad, en caso contrario se está considerando una llovizna que no produce efectos críticos necesarios para el diseño o evaluación de obras civiles (esta intensidad es fácil de identificar con un poco de experiencia en la selección de tormentas). Con el mismo criterio, se considera el fin de tormenta cuando la intensidad de lluvia disminuya a valores menores a 0.5 mm/h.

Se debe considerar una tormenta como compuesta cuanto el intervalo de tiempo de intensidad baja ( $0 < i < 0.5 \text{ mm/h}$ ), es mayor o igual al tiempo de concentración de el área de drenaje en estudio.

Las subcuencas aportantes desde la parte occidental de la Hoya de Quito, tienen tiempos de concentración promedios entre 0.5 horas, por lo que para estas subcuencas, un receso de tormenta de 30 min, es suficiente para considerar tormenta separada. Para la aplicación en áreas mayores de drenaje y

tomando en cuenta los estudios de patrones de tormenta de Huff, el intervalo de receso a considerar para tratar a una tormenta como separada será de 6 horas.

#### II.4.2. DATOS DE BASE

En el anexo N°1 se encuentran los datos de las tormentas escogidas durante todo el período de años de registro de la estación Quito - Observatorio, de ellas se indica: Fecha, hora de inicio, hora de fin, duración de tormenta en minutos y los puntos de cambio de intensidad ( altura de precipitación  $p_i$ [mm] - tiempo  $h_i$ [h] ) necesarios para la identificación de las tormentas. También se incluye los registros de tormentas obtenidos en las cinco restantes estaciones, los cuales han sido utilizados tanto en el estudio dinámico como en la comparación de resultados obtenidos en la estación base.

El anexo N°2 resume los datos de mayores intensidades para diferentes duraciones en el período utilizado de la estación base.

El número total de eventos de tormenta seleccionados es de 289, registrados en un período de 73 años desde 1916 hasta 1994, los datos de los años 1988, 1925, 1923, 1922 no se han podido obtener debido a la falta de los registros.

Las fajas pluviográficas desde el año 1929 hasta la presente fecha tienen registro diario, antes de dicho intervalo, las fajas se registraban semanalmente, por esta razón, los datos provenientes de estos años no indican claramente los cambios del patrón interno de tormenta. De estos registros solamente se ha seleccionado 13 años (1916 - 1928) en los que todavía los datos

pueden ser extraídos.

En los registros pluviográficos del período 1916 a 1928, no se observa claramente las intensidades para 5 min, 10 min, 15 min y 20 min de duración, debido a esta razón los datos de intensidades solamente se tomarán en cuenta a partir de una duración igual a 30 min. para este período.

Para el estudio de la dinámica de la tormenta, se han obtenido los pluviogramas de las estaciones que administra el INAMHI en un período de 13 años, desde 1980 hasta 1992. Dichos registros son diarios y en su totalidad tienen mucha confiabilidad, aunque no se ha encontrado registros anuales muy valiosos para el presente estudio. Las estaciones Iñaquito e Izobamba no poseen la faja pluviográfica de los años 1984 y 1992 respectivamente. Los únicos años conseguidos de la Estación Chorrera, corresponden a 1980, 1982, 1984, 1988.

Los registros pluviográficos de los años 1985 y 1982 obtenidos de la estación Aeropuerto también han sido utilizados en el estudio dinámico.

## CAPITULO III

### HIETOGRAMAS CRITICOS

#### III.1 ANALISIS DE FRECUENCIAS DE LAS DURACIONES DE LA TORMENTA

Muchos de los procesos hidrológicos son tan complejos que ellos pueden ser interpretados y explicados solamente en un sentido probabilístico. Tales procesos tienen una incertidumbre natural y son el resultado de la incidencia de muchos factores que dan un caracter randómico o estocástico.

Los métodos de análisis estadísticos proveen métodos para reducir y resumir datos observados con el fin de presentarlos en forma más significativa.

El análisis estadístico involucra dos tipos de problemas, uno descriptivo y otro inferencial, el primero es una sencilla aplicación de métodos estadísticos, requiere pocas decisiones y presenta poco riesgo. El problema inferencial, sin embargo, presenta más riesgo y necesita de un amplio entendimiento tanto de los métodos empleados como en su predicción y estimación. Un Ejemplo claro que puede ayudar a identificar el problema inferencial, es el caso del desarrollo e interpretación de las curvas I-D-F, las cuales se basan en el ajuste de datos observados según alguna secuencia, a una distribución probabilística teórica, que trata de representar la población.

Las variables en procesos de estudio son continuas si se pueden registrar todos los valores en el rango de ocurrencia; en cambio, ellas son discretas si sus valores son restringidos por alguna cualidad específica. La distribución de las variables en el rango de ocurrencia se define en términos de frecuencia o



probabilidad.

Dentro del estudio del presente capítulo, la variable de interés es la duración de la tormenta considerada, y se la debe entender como el intervalo de tiempo ( $T_t$ ) entre el inicio y fin de tormenta.

Durante los inicios de tormenta, gran parte de la lluvia se infiltra o de otra manera es abstraída, y la duración del exceso de lluvia  $T_o$  es menor que el tiempo de lluvia total ( $T_t$ ) en una cantidad igual al tiempo en que ocurren las abstracciones iniciales ( $T_r$ ).

$$T_o = T_t - T_r \quad [4]$$

En relación con la tormenta de diseño, la duración del exceso de lluvia que puede producir escurrimiento es la importante.

La duración asumida por el SCS en diseños emergentes para pequeñas represas es el mayor entre<sup>4</sup> :

$$t = 6 \text{ horas}$$

$$t = T_c \text{ de la cuenca}$$

En el diseño de estructuras menores, a menudo, su valor no puede ser justificado económicamente en base a los tiempos mencionados. Particularmente para estructuras de drenaje urbano, el diseño de hidrogramas de crecida se basa en la duración de tormenta considerada igual al tiempo de concentración del área de drenaje. Esta consideración es utilizada tanto por el Método Racional cuanto por el Hidrograma unitario sintético, junto con un patrón de tormenta obtenido del análisis de la lluvia de

exceso, en la secuencia más crítica.

Duraciones de tormenta de aproximadamente 6 horas o menos son satisfactorios para pequeñas cuencas, pero la duración para grandes áreas de drenaje puede incluso ser superior a 10 días.

### III.1.1 ESTUDIO ESTADISTICO

#### III.1.1.1 ESTUDIO DESCRIPTIVO

Los parámetros estadísticos considerados en este estudio que definen las propiedades de una muestra son:

- Media
- Desviación Estándar
- Coeficiente de variación
- Coeficiente de asimetría

El significado de cada uno de estos parámetros se halla en las referencias bibliográficas estadísticas citadas, de ellas, los valores obtenidos para la variable duración a partir de una muestra de 289 datos, se indican a continuación:

|                          |           |
|--------------------------|-----------|
| Media aritmética         | 536.9 min |
| Desviación Estándar      | 349.9 min |
| Coeficiente de asimetría | 0.53      |
| Coeficiente de varianza  | 0.65      |

Si se observa los valores mínimos y máximos de la variable duración indicada en la muestra de el anexo N°1, se tiene:

|                 |            |          |
|-----------------|------------|----------|
| Duración Mínima | 34 min =   | 0.57 h.  |
| Duración Máxima | 1119 min = | 18.65 h. |

A esta muestra se la puede clasificar como muy dispersa, con un leve sesgo positivo, su valor medio es el resultado de observaciones máximas en diferentes intervalos de duración, lo que se observa en la distribución de tipo trimodal de la muestra, Fig. III.1.a.

### III.1.1.2. ESTUDIO INFERENCIAL

#### DISTRIBUCIONES TEÓRICAS

Muchas distribuciones teóricas de probabilidades han sido usadas para describir procesos hidrológicos. Sin embargo, se debe enfatizar que una distribución teórica no es una representación exacta de un proceso natural, pero su utilidad es indiscutible, pues facilita la interpolación y extrapolación de valores.

Las distribuciones teóricas más comunes utilizadas en fenómenos hidrológicos son<sup>7</sup> :

- NORMAL
- LOG-NORMAL
- GAMMA : PEARSON II (dos parámetros)
- PEARSON III (tres parámetros)
- LOG-PEARSON
- GUMBEL
- LOG-GUMBEL

Un resumen de las propiedades de cada una de las distribuciones indicadas y algunos criterios para su selección son indicados a continuación:

#### A) DISTRIBUCION NORMAL

Esta distribución es simétrica, tiene forma de campana, tiene dos parámetros, la media  $\mu$  y la desviación standard  $\sigma$ .

##### RECOMENDACIONES:

- El rango teórico de los valores va de  $-\infty$  a  $+\infty$  (Los valores de duración son positivos)
- Es aceptable cuando el coeficiente de asimetría está entre 0 y 0.5 <sup>8</sup>
- El 50 % de los valores están entre  $D_m - 2/3S$  y  $D_m + 2/3S$   
El 68 % de los valores están entre  $D_m - S$  y  $D_m + S$   
El 95 % de los valores están entre  $D_m - 2S$  y  $D_m + 2S$

#### B) DISTRIBUCION LOG-NORMAL

Algunos fenómenos hidrológicos, poseen un cierto sesgo hacia la parte derecha, en este caso la frecuencia no seguirá una distribución normal, afortunadamente estos fenómenos a menudo poseen una distribución normal de sus logaritmos.

##### RECOMENDACIONES

- El rango de los valores de la distribución va de 0 a  $+\infty$
- El coeficiente de asimetría de la serie no debe diferir sensiblemente de 0 (positivo o negativo), ya que los logaritmos atenúan el sesgo.
- Deben cumplirse los porcentajes dados en la distribución

normal.

- Aplicable a series donde<sup>8</sup>  $C_s \geq \frac{3C_v - C_v^3}{C_v^3 + 3C_v}$

### C) DISTRIBUCION GUMBEL Y LOG-GUMBEL

La distribución Gumbel basa sus conceptos en distribuciones extremas tipo I las cuales consideran a la distribución de las observaciones menores o mayores como ocurrentes en cada grupo de forma repetida. La distribución de los N valores extremos tomados de N muestras, con m observaciones por muestra, depende de la distribución de los N\*m observaciones totales. Chow, demostró que este tipo de distribución es un caso especial de la distribución Log-Normal cuando  $C_v = 0.364$  y  $C_s = 1.139$ , de allí las recomendaciones.

Al igual que la distribución Gumbel, la distribución Log-Gumbel basa su estudio teórico en distribuciones extremas pero de tipo II (Un Ej. de tipo II es la distribución de Cauchy).<sup>9</sup>

#### RECOMENDACIONES:

- Es útil cuando el rango de la variable es positivo
- Es aceptable cuando el coeficiente de asimetría no difiere mucho de  $C_s = 1.14$ , siendo más restringido en el caso de la distribución Log-Gumbel

### D) DISTRIBUCION GAMMA-II Y GAMMA-III

Este tipo de distribución es ampliamente utilizada en matemática, estadística y en hidrología.

La distribución Gamma-III o Pearson III (de tres parámetros)

es muy flexible en el sentido en que si se iguala el sesgo a cero, la distribución se reducirá a una distribución Normal.

#### RECOMENDACIONES:

- Rango positivo
- No existen restricciones para el valor de  $C_s$

#### E) DISTRIBUCION LOG-PEARSON-III

Este tipo de distribución ha sido muy utilizada en hidrología, especialmente en métodos standard de análisis frecuencial de caudales. Si se iguala el sesgo a cero, esta distribución se reduce a una distribución Log-Normal.

#### RECOMENDACIONES:

- $C_s$  debe ser mayor que  $2C_v$  para que no haya valores negativos
- Se puede calcular para cualquier valor de  $C_s$ .<sup>8</sup>

#### DISTRIBUCION EMPIRICA

Para la obtención de la distribución empírica se ha tomado en cuenta la frecuencia con que los valores de la duración se encuentran dentro de intervalos de clase.

Para el actual estudio, el número de intervalos de clase es 1000, lo que produce un ancho de intervalo de clase igual a 1.885 (min).

La probabilidad acumulada teórica se obtiene a partir de la frecuencia porcentual de la variable duración en cada intervalo,

esta frecuencia porcentual al ser dividida para el ancho del intervalo de clase se obtiene la densidad empírica para cada intervalo (Fig. III.1.a). Si se acumula el área barrida en cada intervalo, el resultado final es la función de distribución acumulada empírica, la cual está representada en la Fig. III.1.b.

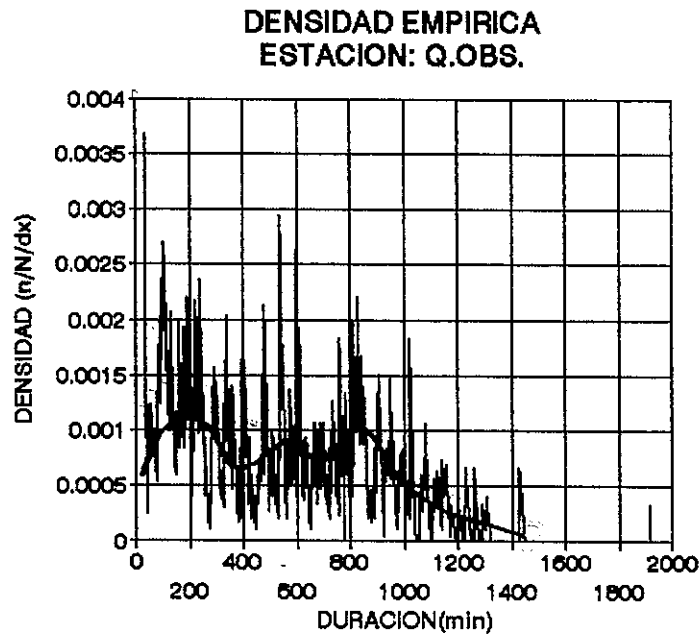

Fig. III.1.a

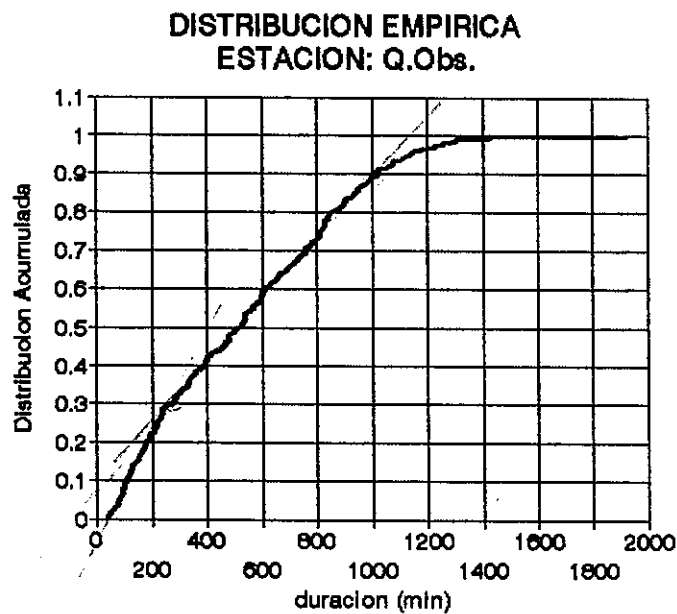

Fig. III.1.b.

### III.1.1.3. COMPARACION DE LAS DISTRIBUCIONES TEÓRICAS CON LA DISTRIBUCION EMPIRICA

Determinadas las restricciones y recomendaciones en el uso de las distribuciones teóricas, es necesario realizar una comparación de estas distribuciones con la distribución empírica; con el fin de escoger y sugerir la distribución que mejor se ajuste a la variable duración de tormenta. de esto se señala:

- La distribución Normal y Log-normal, no se tomarán en cuenta por las claras restricciones encontradas ya que  $C_s > 0.5$  y los valores comprendidos entre  $Q_M - 2/3S$  y  $Q_M + 2/3S$  son del 38 %, al igual que el porcentaje de valores comprendidos entre  $Q_M - S$  y  $Q_M + S$  es de 61 % .(Fig. III.2.)
- Para la distribución log-normal, la restricción:  
 $C_s \geq 3C_v + C_v^3$  difiere sensiblemente en  $0.53 \geq 2.22$   
 (Fig. III.2.)

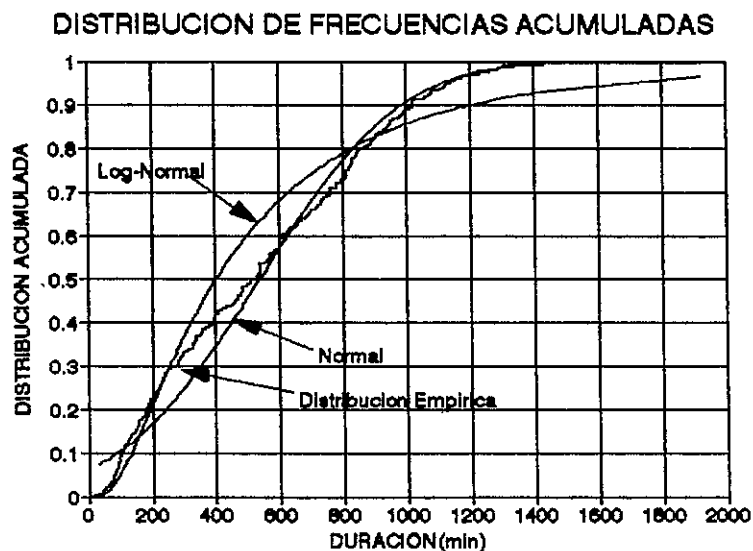

Fig. III.2.



- Para el caso de la distribución Gumbel (Fig. III.3.), el coeficiente de asimetría ( $C_s = 0.53$ ) difiere mucho de 1.14, aunque se puede observar mayor ajuste con la distribución empírica.

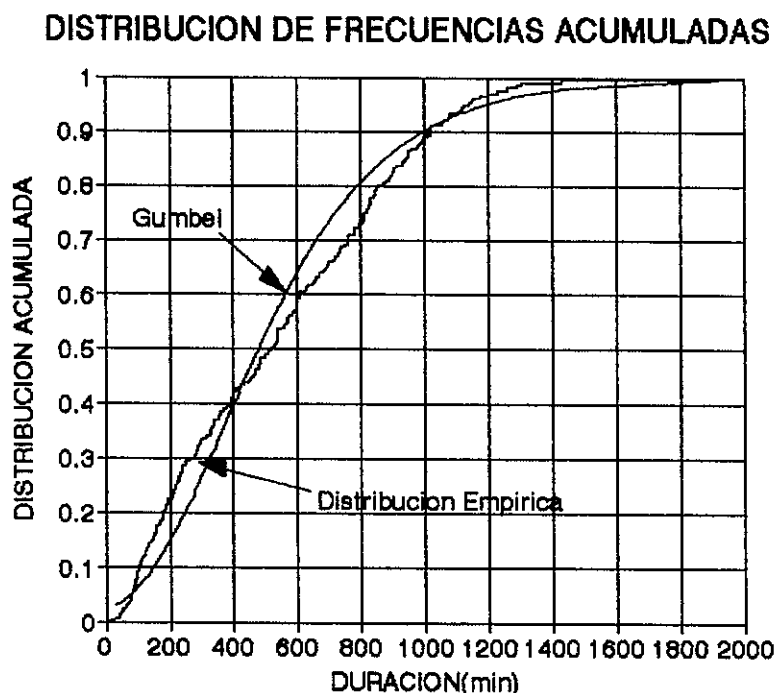

Fig. III.3.

- Para la distribución Log-pearson el valor del coeficiente de asimetría ( $C_s=0.53$ ), no es mayor al valor  $2 \cdot C_v$ , condición necesaria para la utilización de esta distribución teórica.
- Las distribuciones teóricas Pearson II y Pearson III no presentan ninguna restricción, además se puede observar el mejor ajuste entre estas distribuciones y la distribución empírica (Fig. III.4.). La distribución Pearson II es la que mayor ajuste presenta, con variaciones de hasta un 8 %.

## DISTRIBUCION DE FRECUENCIAS ACUMULADAS

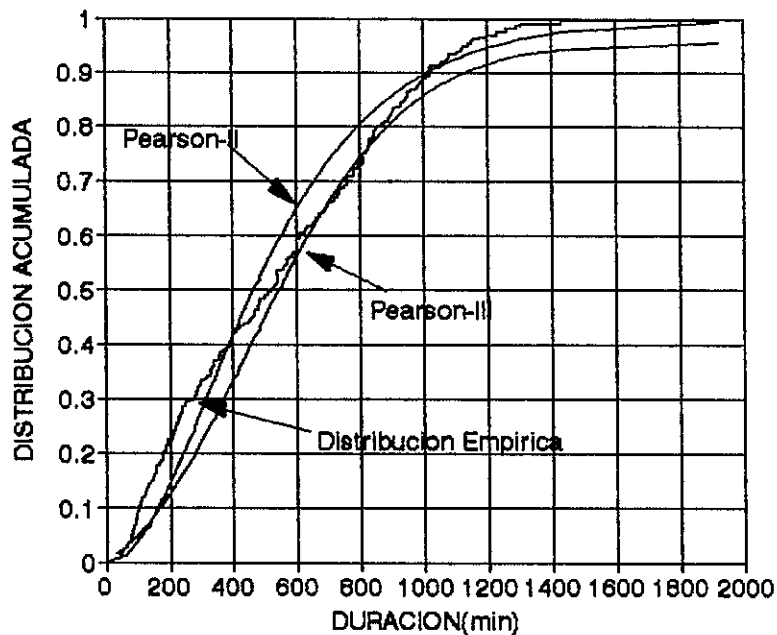

Fig. III.4.

- La distribución empírica sugiere una distribución de frecuencias de tipo trimodal, con máximas frecuencias en las duraciones:

$$D1 = 200 \text{ (min.)} = 3.33 \text{ (h.)}$$

$$D2 = 600 \text{ (min.)} = 10.00 \text{ (h.)}$$

$$D3 = 1000 \text{ (min.)} = 16.67 \text{ (h.)}$$

y mínimas frecuencias en las duraciones:

$$d1 = 35 \text{ (min.)} = 0.58 \text{ (h.)}$$

$$d2 = 500 \text{ (min.)} = 7.33 \text{ (h.)}$$

$$d3 = 775 \text{ (min.)} = 11.67 \text{ (h.)}$$

$$d4 = 1920 \text{ (min.)} = 32.00 \text{ (h.)}$$

- Se debe considerar estos valores para posteriores análisis sobre la frecuencia de ocurrencia de las curvas de Huff entre los diferentes intervalos de mínimo a mínimo.
- La distribución empírica de tipo trimodal, representa el efecto preponderante de los fenómenos muy notorios en hoyas interandinas. Se puede mencionar que en el intervalo de duraciones bajas,  $d_1 - d_2$  (466 min.), los efectos climáticos de tipo local son los dominantes, mientras que las tormentas con grandes duraciones y que se encuentran en el intervalo  $d_3 - d_4$  (1155 min.) se las puede considerar como tormentas de tipo regional propias de perturbaciones que llegan desde la región Amazónica o como consecuencia de la actividad de la Zona de Convergencia Intertropical ZCIT la cual influye directamente sobre el régimen de precipitaciones de la región litoral.

El intervalo de duraciones medias  $d_2 - d_3$  ( 275 min.) representa la influencia de fenómenos con naturaleza distinta tanto de origen local como regional.

### III.2. RELACIONES INTENSIDAD - DURACION CARACTERISTICAS

Las ecuaciones Intensidad-Duración-Frecuencia son utilizadas como datos de entrada en la simulación del fenómeno Precipitación-Escurrimiento. Estas ecuaciones en cuanto a duración tienen muy poco rango de aplicación, afortunadamente, en la mayoría de diseños urbanos, los tiempos de concentración considerados son del orden de pocos minutos.

La duración de tormenta implícitamente está relacionada con la altura de precipitación y por lo tanto con la intensidad media de tormenta.

Una ecuación general de intensidad media en función de la duración para tormentas registradas en la estación Quito-Observatorio ha sido generada utilizando ajustes por mínimos cuadrados. Para mejorar el ajuste se utiliza una transformación logarítmica.

La ecuación obtenida es la siguiente:

$$i = \frac{28.117}{D^{0.9621}} r^2 \quad [5]$$

Donde,  $i$  = intensidad media en mm/h, es decir, la altura de precipitación dividido para la duración de tormenta.

$D$  = Duración en Horas

$r^2 = 0.93$  ( Coeficiente de correlación )

En la Fig. III.5. se indica el ajuste obtenido de la ecuación [5]. Reemplazando en esta ecuación la altura de precipitación despejada de:

$$i = \frac{P}{D} \quad [6]$$

**CURVA INTENSIDAD-DURACION  
ESTACION: Q.Obs.**

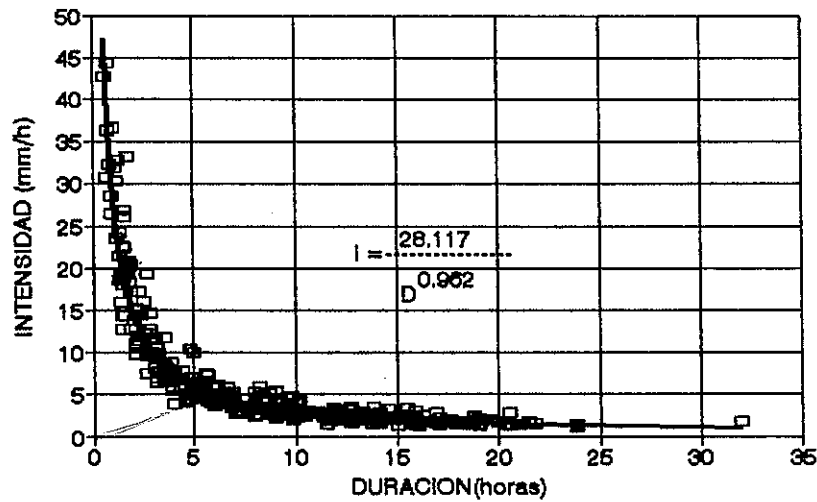

Fig. III.5.

Se obtiene la ecuación de la precipitación en función de la duración siguiente:

$$P = 28.117 * D^{0.0379} \quad [7]$$

La Fig. III.6 esquematiza las ecuaciones 5 y 7.

**CURVA INTENSIDAD-DURACION  
Y CURVA PRECIPITACION-DURACION**

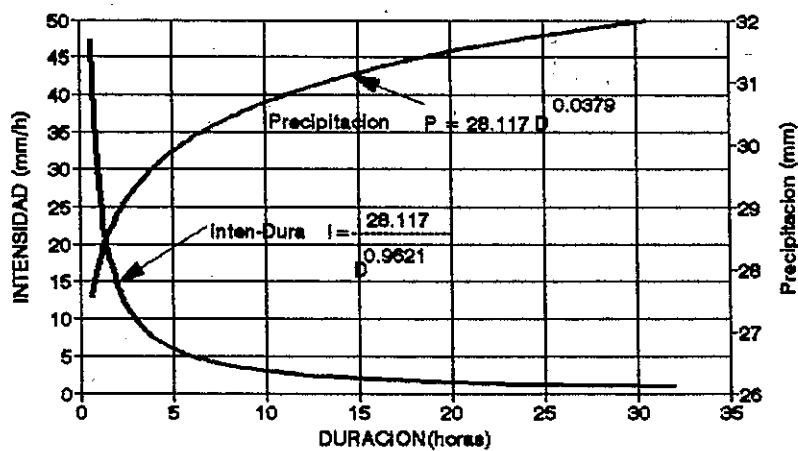

Fig. III.6.

Al aplicar el procedimiento anterior para tormentas registradas en las otras estaciones de estudio (Anexo 1), resulta interesante notar que las ecuaciones obtenidas son muy similares entre si, el Cuadro III.1. muestra los ajuste en las mismas unidades de la ecuación obtenida para Quito-Observatorio, en la Fig. III.7. se grafica las ecuaciones ajustadas.

| Estación       | a      | b      | r <sup>2</sup> |
|----------------|--------|--------|----------------|
| Q.Observatorio | 28.117 | 0.9621 | 0.930          |
| Iñaquito       | 25.027 | 0.9377 | 0.897          |
| Izobamba       | 24.870 | 0.9278 | 0.928          |
| Tola           | 30.153 | 1.0291 | 0.889          |
| Aeropuerto     | 22.062 | 1.0431 | 0.907          |
| Chorrera       | 19.168 | 0.8290 | 0.831          |

Cuadro III.1.

En que;

$$i = \frac{a}{bD}$$

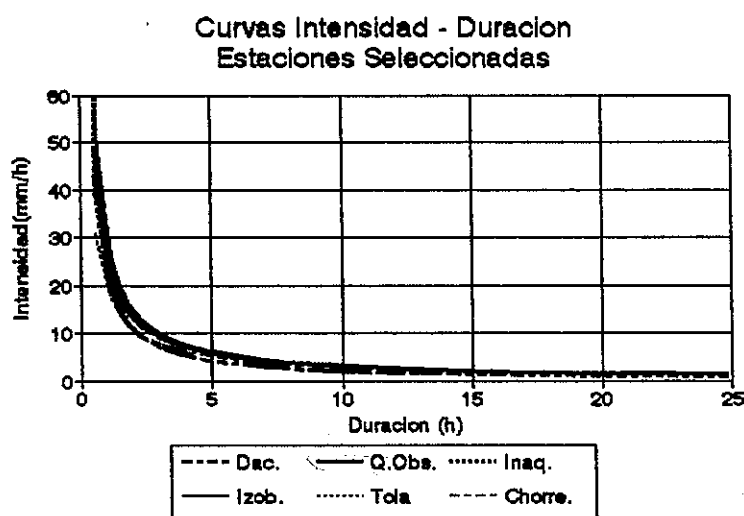

Fig. III.7.

Las anteriores ecuaciones se las ha ajustado para tormentas cuya precipitación puntual en cada estación es superior a 15.6mm., valor que, representa la precipitación mínima obtenida en las tormentas analizadas en la estación Quito-Observatorio.

Se debe notar que los ajustes obtenidos son muy parecidos entre las estaciones seleccionadas, esto implica que el traslado de información de estaciones con registros históricos aceptables a otras estaciones, no se lo debe hacer en función de características como son la precipitación media anual o la diferencia de altura, por ejemplo, en las estaciones Izobamba y Quito-Observatorio las características de tormenta son muy similares, las tormentas difieren únicamente en la cantidad de eventos por año y no en las características propias internas de la tormenta. Para ratificar estos resultados, se ha realizado un conteo del número de días con precipitación en las estaciones Tola, Aeropuerto, Iñaquito e Izobamba para el año 1993. los resultados se indican en el Cuadro III.2.

| Estación            | Número de días con precipitación en el año 1993 |
|---------------------|-------------------------------------------------|
| Izobamba            | 108                                             |
| Iñaquito            | 81                                              |
| Aeropuerto          | 63                                              |
| <del>Izobamba</del> | 25                                              |

TOLA

Cuadro III.2.

### III.3. DETERMINACION DE HIETOGRAMAS CRITICOS CON PROBABILIDAD ASIGNADA Y RELACION CON LAS CURVAS DE HUFF

En el capítulo II, se precisó los conceptos importantes para desarrollar el presente análisis. Se ha generado el programa HIET10.BAS (Anexo N°3), con el propósito de comparar los pluviogramas adimensionales obtenidos con las curvas propuestas por Huff. El proceso de adimensionalizar un pluviograma consiste en dividir la altura de precipitación y el tiempo de registro de los diferentes puntos que indican la forma de la tormenta, para la precipitación total y la duración total de tormenta respectivamente.

Basado en el ajuste por mínimos cuadrados a las curvas de Huff, el programa HIET10.BAS, compara al pluviograma adimensional de la tormenta en estudio, con todas las curvas adimensionales de Huff, y escoge aquella con menor error absoluto, asignando el cuartil y la probabilidad de dicha curva, al pluviograma adimensional observado.

De la información obtenida, se ha realizado un análisis del peso del cuartil en los tres intervalos de duración de tormenta encontrados ( bajo, medio y alto). El programa elaborado, es capaz de eliminar una cantidad de precipitación inicial ( 0 mm, 12.7 mm. y 25.4 mm.), asumida igual a las abstracciones iniciales, y crear nuevos puntos que indiquen la forma del pluviograma, con el propósito de analizar el cambio del cuartil al asumir diferentes abstracciones iniciales. El hecho de considerar un estado de partida en el que las abstracciones iniciales se asumen es cero, supone que el área de influencia de



la tormenta está libre de vegetación que produzca intercepción y libre de relieves que produzcan retención. Por supuesto, esto no es un caso práctico y más aun real, pero su estudio y resultados conjuntamente con diferentes estados de abstracciones iniciales más reales, van a ayudar a la interpretación del modelo precipitación-escorrentía de la ciudad de Quito. Así, la aplicación de los resultados que adelante se indican dependerá del valor de las abstracciones iniciales que se reflejarán en las características del área de drenaje.

### III.3.1. ABSTRACCIONES INICIALES IGUAL A CERO

Según los resultados obtenidos en el análisis frecuencial de la duración de tormenta, el análisis se lo realiza en los tres rangos de duración encontrados.

#### DURACIONES MENORES.

El rango de duraciones menores, corresponde a:

$$D_{MIN} = 35 \text{ min} = 0.58 \text{ h.}$$

$$D_{MAX} = 499 \text{ min} = 8.32 \text{ h.}$$

Los resultados tabulados para todos los cuartiles se indican en el Cuadro III.3

La cantidad de tormentas que se encuentran en este rango representa el 49 % del total de ellas, de éstas, el 66 % corresponde al primer cuartil con sus diferentes probabilidades, el 17 % al segundo cuartil y el 17 % restante se distribuye entre

el tercero y cuarto cuartil. En este intervalo de duraciones, se puede notar una alta tendencia de las tormentas a localizarse en el primer cuartil primeramente, y en segundo término en el segundo cuartil. Entre los primeros dos cuartiles, el porcentaje de las tormentas para duraciones menores es del 83 %, valor que posteriormente se toma en cuenta para la conclusión final de la relación Duración-Cuartil.

Un estudio más detallado del primer cuartil nos indica que las curvas de 10 % de probabilidad son las de mayor frecuencia (20 %), seguidas por las curvas del 50 % 40 % y 30 % con frecuencias de 15 %, 15 % y 14 % respectivamente.

El 51 % de las tormentas con duraciones menores se distribuyen entre las curvas del 10 %, 40 % y 50 %.

Para el segundo cuartil, el 63 % de las tormentas en este rango se encuentra distribuido entre las curvas del 20 %, 30 % y 50 % con frecuencias de 17 %, 17 % y 29 % respectivamente.

Para el tercer cuartil, los pesos de las curvas de 30 % y 40 %, se llevan el 62 %. Para el cuarto cuartil, el 70 % corresponde a la curvas de 20 % y 30 % acumuladas.

#### DURACIONES MEDIAS

El rango de duraciones medias, corresponden al estudio de análisis de frecuencia de la duración de tormentas, sus límites inferior y superior son los siguientes:

DURMIN = 510 min = 8.5 h.

DURMAX = 760 min = 12.7 h.

El cuadro III.4. contiene los resultados del análisis de este rango de duraciones.

El número de eventos de tormentas que se encuentran en este rango, representa el 22 % del total de los eventos registrados. De estas tormentas, el 64 % corresponde al primer cuartil, notándose de esta manera que el peso del primer cuartil no cambia con relación al intervalo de duración anterior. Para el segundo cuartil, el porcentaje es del 13 %, lo que equivale que entre los dos cuartiles, el porcentaje acumulado represente el 77 % , el porcentaje restante (23 %), se distribuye entre el tercero y cuarto cuartil. Se debe notar un ligero aumento del peso en el tercero y cuarto cuartil en relación a la disminución del peso en el primero y segundo cuartil para este intervalo de duraciones.

En relación a la frecuencia de ocurrencia de las diferentes curvas en cada cuartil, se observa que para el primer cuartil, las curvas del 90 %, 80 % y 70 % de probabilidad, tienen 25 %, 15 % y 18 % de frecuencia respectivamente, lo que entre las tres curvas, la frecuencia acumulada es 58 %.

Para el segundo cuartil, 64 % de los eventos de tormentas en este rango, se distribuyen entre las curvas de 60 %, 70 % y 80 % de probabilidad con frecuencias porcentuales de 13 %, 38 % y 13 % respectivamente.

Este cambio del tipo de curva entre duraciones menores y duraciones medias ,tanto en el primero como en el segundo cuartil, indican una tendencia de las tormentas a la pérdida de la suavidad de el proceso de precipitación, existiendo altibajos de la intensidad de lluvia durante el evento.

En lo referente al tercer cuartil, el 62 % de las tormentas

## ANALISIS DE FRECUENCIAS DE LOS DIFERENTES CUARTILES PARA DURACIONES MENORES

|                                                        | DURACION<br>(min) |      |            |      | CANTIDAD DE LLUVIA<br>(mm) |      |            |       |
|--------------------------------------------------------|-------------------|------|------------|------|----------------------------|------|------------|-------|
| MAX.                                                   | 499               |      |            |      | 55.3                       |      |            |       |
| MIN                                                    | 34                |      |            |      | 15.6                       |      |            |       |
| %                                                      | CUARTIL 1         |      | CUARTIL 2  |      | CUARTIL 3                  |      | CUARTIL 4  |       |
|                                                        | FRECUENCIA        | %    | FRECUENCIA | %    | FRECUENCIA                 | %    | FRECUENCIA | %     |
| 10                                                     | 18                | 19.8 | 2          | 8.3  | 1                          | 7.7  | 0          | 0.0   |
| 20                                                     | 9                 | 9.9  | 4          | 16.7 | 0                          | 0.0  | 3          | 30.0  |
| 30                                                     | 13                | 14.3 | 4          | 16.7 | 3                          | 23.1 | 4          | 40.0  |
| 40                                                     | 14                | 15.4 | 2          | 8.3  | 5                          | 38.5 | 1          | 10.0  |
| 50                                                     | 14                | 15.4 | 7          | 29.2 | 2                          | 15.4 | 1          | 10.0  |
| 60                                                     | 11                | 12.1 | 3          | 12.5 | 2                          | 15.4 | 0          | 0.0   |
| 70                                                     | 5                 | 5.5  | 1          | 4.2  | 0                          | 0.0  | 0          | 0.0   |
| 80                                                     | 5                 | 5.5  | 1          | 4.2  | 0                          | 0.0  | 1          | 10.0  |
| 90                                                     | 2                 | 2.2  | 0          | 0.0  | 0                          | 0.0  | 0          | 0.0   |
| TOTAL                                                  | 91                | 100  | 24         | 100  | 13                         | 100  | 10         | 100.0 |
| % TOTAL                                                | 66.9              |      | 17.4       |      | 9.4                        |      | 7.2        |       |
| TOTAL GENERAL = 136 TORMENTAS % Total = 48.8           |                   |      |            |      |                            |      |            |       |
| % DE EVENTOS ENTRE EL PRIMER Y SEGUNDO CUARTIL: 63.3 % |                   |      |            |      |                            |      |            |       |

Cuadro III.3.

## ANALISIS DE FRECUENCIAS DE LOS DIFERENTES CUARTILES PARA DURACIONES MEDIAS

|                                                        | DURACION<br>(min) |      |            |      | CANTIDAD DE LLUVIA<br>(mm) |      |            |       |
|--------------------------------------------------------|-------------------|------|------------|------|----------------------------|------|------------|-------|
| MAX.                                                   | 760               |      |            |      | 48.5                       |      |            |       |
| MIN                                                    | 510               |      |            |      | 19.1                       |      |            |       |
| %                                                      | CUARTIL 1         |      | CUARTIL 2  |      | CUARTIL 3                  |      | CUARTIL 4  |       |
|                                                        | FRECUENCIA        | %    | FRECUENCIA | %    | FRECUENCIA                 | %    | FRECUENCIA | %     |
| 10                                                     | 5                 | 12.5 | 0          | 0.0  | 1                          | 14.3 | 3          | 37.5  |
| 20                                                     | 1                 | 2.5  | 1          | 12.5 | 0                          | 0.0  | 4          | 50.0  |
| 30                                                     | 2                 | 5.0  | 1          | 12.5 | 1                          | 14.3 | 1          | 12.5  |
| 40                                                     | 2                 | 5.0  | 0          | 0.0  | 3                          | 42.9 | 0          | 0.0   |
| 50                                                     | 5                 | 12.5 | 0          | 0.0  | 0                          | 0.0  | 0          | 0.0   |
| 60                                                     | 2                 | 5.0  | 1          | 12.5 | 1                          | 14.3 | 0          | 0.0   |
| 70                                                     | 7                 | 17.5 | 3          | 37.5 | 1                          | 14.3 | 0          | 0.0   |
| 80                                                     | 6                 | 15.0 | 1          | 12.5 | 0                          | 0.0  | 0          | 0.0   |
| 90                                                     | 10                | 25.0 | 1          | 12.5 | 0                          | 0.0  | 0          | 0.0   |
| TOTAL                                                  | 40                | 100  | 8          | 100  | 7                          | 100  | 8          | 100.0 |
| % TOTAL                                                | 63.5              |      | 12.7       |      | 11.1                       |      | 12.7       |       |
| TOTAL GENERAL = 63 TORMENTAS % Total = 22.3            |                   |      |            |      |                            |      |            |       |
| % DE EVENTOS ENTRE EL PRIMER Y SEGUNDO CUARTIL: 76.2 % |                   |      |            |      |                            |      |            |       |

Cuadro III.4.

que tienen intensidad máxima en este cuartil, se verifican en las curvas de 30 % y 40 % de probabilidad con 23 % y 39 % respectivamente. En el cuarto cuartil, el 70 % de las tormentas es acumulado por las curvas de 20 % y 30 %.

#### DURACIONES MAYORES

Los límites superior e inferior de este rango de duración son:

$$\text{DURMAX} = 1920 \text{ min} = 32 \text{ h.}$$

$$\text{DURMIN} = 780 \text{ min} = 13 \text{ h.}$$

En este intervalo de duración se encuentra el 29 % de todas las tormentas registradas, de estas, el 50 % de eventos de tormentas corresponden al primer cuartil, el 16 % corresponden al segundo cuartil, el 16 % al tercer cuartil y el 18 % restante se presenta en el cuarto cuartil. Esto demuestra la reducción del peso del primer cuartil de acuerdo al aumento de la duración de tormenta, lo que no se puede afirmar del segundo cuartil. A la vez se observa que el peso del tercero y cuarto cuartil tienden a elevarse aunque no de manera preponderante.

En lo que se refiere a las frecuencias de forma de curva, para el primer cuartil, tres tipos de curvas tienen mayor cantidad de ajustes, la curva de 10 % , 80 % y 90 % con frecuencias porcentuales de 22 % ,17 % y 17 % respectivamente. Para el segundo cuartil, las curvas de 70 % , 80 % y 90 % de probabilidad sugeridas por Huff tienen una frecuencia porcentual de ocurrencia de 23 %, 23 % y 15 % respectivamente, lo que indica el dominio del 61 % de frecuencia de tormenta por estos tres

tipos de curvas. Esto indica la tendencia continua a la no suavidad de la forma de la tormenta con el aumento de la duración de la misma.

En este intervalo de duraciones, para el tercero o cuarto cuartil, el 50 % de las tormentas se distribuyen entre las curvas de 10 %, 20 % y 30 %.

Estos resultados se encuentran en el Cuadro III.5.

### ANALISIS GENERAL DE DURACION

Un análisis particular del estudio de la frecuencia de ocurrencia de los diferentes cuartiles, de acuerdo al intervalo de duración de la tormenta, puede sacar a flote muchas características de formas predominantes de curvas en los diferentes intervalos de duración. Con el propósito de exponer criterios más generales y que los resultados obtenidos contengan criterios prácticos y fáciles de usar, se realiza un estudio con todas las tormentas independientes de la duración de las mismas.

El rango de duración de tormentas de este modo determinado, es:

DURMAX = 1920 (min.)

DURMIN = 35 (min.)

De el número total de tormentas registrados, el 61 % de ellas tienen su intensidad máxima en el primer cuartil, el 16 % en el segundo cuartil y el 23 % entre el tercero y cuarto cuartil, lo que indica que la probabilidad de que una tormenta corresponda al primer cuartil es 3.8 veces mayor de la

probabilidad que corresponda al segundo cuartil (Cuadro III.6.).

La frecuencia porcentual acumulada entre el primero y segundo cuartil es de 77 %, para el total de tormentas registradas en la estación Quito-Observatorio, lo cual es 17 % mayor a los resultados sugeridos obtenidos por Huff (≈66 %) y que además difiere si el estudio se lo realiza en los diferentes intervalos de duración.

En general, las formas de curvas predominantes en el primer cuartil son las curvas de 10 %, 50 % y 90 % de probabilidad, con porcentajes de frecuencia de 19 % , 14 % y 11 % respectivamente, lo cual acumulado equivale a el 44 %.

Para el segundo cuartil, el 47 % de las tormentas con máxima intensidad en dicho cuartil, se reparte entre las curvas propuestas por Huff de 50 %, 60 % y 70 % de probabilidad, con frecuencias de 18 %, 13 % y 16 % respectivamente.

En el tercer cuartil, el 69 % de sus tormentas se distribuyen entre las curvas de 10 %, 30 % y 40 % de probabilidad.

Para el cuarto cuartil, entre las curvas de 10 %, 20 % y 30 % de probabilidad se distribuye el 84 % de las tormentas en este cuartil.

En este estudio general de la duración, se verifica la superposición de los efectos separados obtenidos para los diferentes intervalos de duración, lo cual tiene y debe ser utilizado por el Ingeniero diseñador de acuerdo a la naturaleza y destino de las obras proyectadas.

## ANALISIS DE FRECUENCIAS DE LOS DIFERENTES CUARTILES PARA DURACIONES ALTAS

|                                                        | DURACION<br>(min) |      |            |      | CANTIDAD DE LLUVIA<br>(mm) |      |            |       |
|--------------------------------------------------------|-------------------|------|------------|------|----------------------------|------|------------|-------|
| MAX.                                                   | 1920              |      |            |      | 58.7                       |      |            |       |
| MIN                                                    | 780               |      |            |      | 16.7                       |      |            |       |
| %                                                      | CUARTIL 1         |      | CUARTIL 2  |      | CUARTIL 3                  |      | CUARTIL 4  |       |
|                                                        | FRECUENCIA        | %    | FRECUENCIA | %    | FRECUENCIA                 | %    | FRECUENCIA | %     |
| 10                                                     | 9                 | 22.0 | 0          | 0.0  | 3                          | 23.1 | 6          | 40.0  |
| 20                                                     | 3                 | 7.3  | 0          | 0.0  | 2                          | 15.4 | 3          | 20.0  |
| 30                                                     | 2                 | 4.9  | 1          | 7.7  | 3                          | 23.1 | 4          | 26.7  |
| 40                                                     | 0                 | 0.0  | 1          | 7.7  | 3                          | 23.1 | 0          | 0.0   |
| 50                                                     | 5                 | 12.2 | 1          | 7.7  | 1                          | 7.7  | 2          | 13.3  |
| 60                                                     | 2                 | 4.9  | 2          | 15.4 | 1                          | 7.7  | 0          | 0.0   |
| 70                                                     | 6                 | 14.6 | 3          | 23.1 | 0                          | 0.0  | 0          | 0.0   |
| 80                                                     | 7                 | 17.1 | 3          | 23.1 | 0                          | 0.0  | 0          | 0.0   |
| 90                                                     | 7                 | 17.1 | 2          | 15.4 | 0                          | 0.0  | 0          | 0.0   |
| TOTAL                                                  | 41                | 100  | 13         | 100  | 13                         | 100  | 15         | 100.0 |
| % TOTAL                                                | 50.0              |      | 15.9       |      | 15.9                       |      | 18.3       |       |
| TOTAL GENERAL = 82 TORMENTAS % Total= 29.0             |                   |      |            |      |                            |      |            |       |
| % DE EVENTOS ENTRE EL PRIMER Y SEGUNDO CUARTIL: 65.9 % |                   |      |            |      |                            |      |            |       |

Cuadro III.5.

## ANALISIS DE FRECUENCIAS DE LOS DIFERENTES CUARTILES PARA EL RANGO DE DURACIONES COMPLETAS

|                                                        | DURACION<br>(min) |      |            |      | CANTIDAD DE LLUVIA<br>(mm) |      |            |       |
|--------------------------------------------------------|-------------------|------|------------|------|----------------------------|------|------------|-------|
| MAX.                                                   | 1920              |      |            |      | 58.7                       |      |            |       |
| MIN                                                    | 34                |      |            |      | 15.6                       |      |            |       |
| %                                                      | CUARTIL 1         |      | CUARTIL 2  |      | CUARTIL 3                  |      | CUARTIL 4  |       |
|                                                        | FRECUENCIA        | %    | FRECUENCIA | %    | FRECUENCIA                 | %    | FRECUENCIA | %     |
| 10                                                     | 32                | 18.6 | 2          | 4.4  | 5                          | 15.2 | 9          | 27.3  |
| 20                                                     | 13                | 7.6  | 5          | 11.1 | 2                          | 6.1  | 10         | 30.3  |
| 30                                                     | 17                | 9.9  | 6          | 13.3 | 7                          | 21.2 | 9          | 27.3  |
| 40                                                     | 16                | 9.3  | 3          | 6.7  | 11                         | 33.3 | 1          | 3.0   |
| 50                                                     | 24                | 14.0 | 8          | 17.8 | 3                          | 9.1  | 3          | 9.1   |
| 60                                                     | 15                | 8.7  | 6          | 13.3 | 4                          | 12.1 | 0          | 0.0   |
| 70                                                     | 18                | 10.5 | 7          | 15.6 | 1                          | 3.0  | 0          | 0.0   |
| 80                                                     | 18                | 10.5 | 5          | 11.1 | 0                          | 0.0  | 1          | 3.0   |
| 90                                                     | 19                | 11.0 | 3          | 6.7  | 0                          | 0.0  | 0          | 0.0   |
| TOTAL                                                  | 172               | 100  | 45         | 100  | 33                         | 100  | 33         | 100.0 |
| % TOTAL                                                | 60.6              |      | 15.9       |      | 11.7                       |      | 11.7       |       |
| TOTAL GENERAL = 283 TORMENTAS                          |                   |      |            |      |                            |      |            |       |
| % DE EVENTOS ENTRE EL PRIMER Y SEGUNDO CUARTIL: 76.7 % |                   |      |            |      |                            |      |            |       |

Cuadro III.6.



### III.3.2. CONSIDERANDO ABSTRACCIONES INICIALES IGUAL A MEDIA PULGADA (12.7 mm)

El análisis de las duraciones de tormenta considerando las abstracciones iniciales iguales a 12.7 mm, no indican la existencia de distribuciones multimodales, por esta razón, el análisis frecuencial de los cuartiles se realiza para todo el rango de duración encontrado. En este sentido, los límites de duración son:

$$\text{DURMIN} = 16 \text{ min} = 0.27 \text{ h.}$$

$$\text{DURMAX} = 1411 \text{ min} = 23.52 \text{ h.}$$

De una muestra de 272 eventos de tormentas seleccionados, el 76 % tienen su intensidad máxima en el primer cuartil, el 7 % en el segundo y el 17 % restante en el tercero y cuarto cuartil. Por estos resultados, la probabilidad que una tormenta en las condiciones anteriormente indicadas, se ajuste a cualquiera de las curvas del primer cuartil, es aproximadamente 11.5 veces mayor a la probabilidad del segundo cuartil.

En cuanto se refiere al tipo de curva al interior de cada cuartil, las curvas de 10 %, 60 %, 70 % y 80 % son las más frecuentes, acumulando entre las cuatro el 59 % de todas las tormentas con intensidad máxima en el primer cuartil. Para el segundo cuartil, entre las curvas de 10 %, 30 % y 40 %, se acumulan el 50 % de todas las tormentas. Para el tercer cuartil, entre las curvas de 10 % y 20 % se acumula el 61 % de las tormentas con máxima intensidad en este cuartil. En el cuarto cuartil, el 63 % de las tormentas tienen un patrón interno de

tormenta similar a la curva del 10 %.

Todos estos resultados, indican la tendencia al aumento del peso del primer cuartil en relación a los restantes, un resumen de los resultados se indica en el Cuadro III.7.

### III.3.3. CONSIDERANDO ABSTRACCIONES INICIALES IGUALES A UNA PULGADA (25.4 mm.)

Al igual que en el numeral anterior, el rango de duraciones utilizado es el rango total. Los límites de este rango son los siguientes:

$$\text{DURMIN} = 3 \quad \text{min}$$

$$\text{DURMAX} = 1348 \text{ min} = 22.47 \text{ h.}$$

El hecho de considerar abstracciones iniciales iguales a 25.4 mm, descarta a un número de tormentas igual a 63, debido a que ellas no producen escurrimiento, y por otro lado se descartan los eventos que solamente poseen dos puntos de identificación de su forma, lo cual implicaría un aumento en el peso de la curva de 10 % de probabilidad del cuarto cuartil. Por esta razón se analizarán 157 eventos de tormenta.

Al eliminar la parte inicial de las tormentas, se ha producido un cambio claro en la tendencia de los patrones de tormenta dominantes. En el primer cuartil se encuentran el 81 % de las 157 tormentas indicadas, los tipos de curvas dominantes son la curvas de 10 % , 70 % y 80 % de probabilidad, las cuales acumuladas representan el 50 % de las tormentas registradas en este cuartil. Para el segundo cuartil, apenas el 2.5 % de los

ANALISIS DE FRECUENCIAS DE TODOS LOS CUARTILES PARA EL RANGO DE DURACION COMPLETO  
CONSIDERANDO PERDIDAS INICIALES IGUALES A 12.7mm = 1/2plg

|                                                        | DURACION<br>(min) |      |            |      | CANTIDAD DE LLUVIA<br>(mm) |      |            |       |
|--------------------------------------------------------|-------------------|------|------------|------|----------------------------|------|------------|-------|
| MAX.                                                   | 1411              |      |            |      | 48                         |      |            |       |
| MIN                                                    | 16                |      |            |      | 2.9                        |      |            |       |
| %                                                      | CUARTIL 1         |      | CUARTIL 2  |      | CUARTIL 3                  |      | CUARTIL 4  |       |
|                                                        | FRECUENCIA        | %    | FRECUENCIA | %    | FRECUENCIA                 | %    | FRECUENCIA | %     |
| 10                                                     | 34                | 18.5 | 3          | 16.7 | 5                          | 27.8 | 19         | 69.3  |
| 20                                                     | 19                | 9.2  | 2          | 11.1 | 6                          | 33.3 | 9          | 30.0  |
| 30                                                     | 15                | 7.3  | 2          | 11.1 | 2                          | 11.1 | 2          | 6.7   |
| 40                                                     | 10                | 4.9  | 4          | 22.2 | 0                          | 0.0  | 0          | 0.0   |
| 50                                                     | 24                | 11.7 | 2          | 11.1 | 1                          | 5.6  | 0          | 0.0   |
| 60                                                     | 29                | 14.1 | 0          | 0.0  | 1                          | 5.6  | 0          | 0.0   |
| 70                                                     | 25                | 12.1 | 2          | 11.1 | 2                          | 11.1 | 0          | 0.0   |
| 80                                                     | 29                | 14.1 | 0          | 0.0  | 0                          | 0.0  | 0          | 0.0   |
| 90                                                     | 21                | 10.2 | 3          | 16.7 | 1                          | 5.6  | 0          | 0.0   |
| TOTAL                                                  | 206               | 100  | 18         | 100  | 18                         | 100  | 30         | 100.0 |
| % TOTAL                                                | 75.7              |      | 6.6        |      | 6.6                        |      | 11.0       |       |
| TOTAL GENERAL = 272 TORMENTAS                          |                   |      |            |      |                            |      |            |       |
| % DE EVENTOS ENTRE EL PRIMER Y SEGUNDO CUARTIL: 82.4 % |                   |      |            |      |                            |      |            |       |

Cuadro III.7.

ANALISIS DE FRECUENCIAS DE TODOS LOS CUARTILES PARA EL RANGO DE DURACION COMPLETO  
CONSIDERANDO PERDIDAS INICIALES IGUALES A 25.4mm = 1plg

|                                                        | DURACION<br>(min) |      |            |      | CANTIDAD DE LLUVIA<br>(mm) |      |            |       |
|--------------------------------------------------------|-------------------|------|------------|------|----------------------------|------|------------|-------|
| MAX.                                                   | 1348              |      |            |      | 33.2                       |      |            |       |
| MIN                                                    | 3                 |      |            |      | 0.2                        |      |            |       |
| %                                                      | CUARTIL 1         |      | CUARTIL 2  |      | CUARTIL 3                  |      | CUARTIL 4  |       |
|                                                        | FRECUENCIA        | %    | FRECUENCIA | %    | FRECUENCIA                 | %    | FRECUENCIA | %     |
| 10                                                     | 18                | 14.2 | 2          | 50.0 | 1                          | 14.3 | 8          | 42.1  |
| 20                                                     | 7                 | 5.5  | 1          | 25.0 | 1                          | 14.3 | 4          | 21.1  |
| 30                                                     | 4                 | 3.1  | 1          | 25.0 | 1                          | 14.3 | 4          | 21.1  |
| 40                                                     | 4                 | 3.1  | 0          | 0.0  | 1                          | 14.3 | 0          | 0.0   |
| 50                                                     | 15                | 11.8 | 0          | 0.0  | 0                          | 0.0  | 1          | 5.3   |
| 60                                                     | 17                | 13.4 | 0          | 0.0  | 0                          | 0.0  | 0          | 0.0   |
| 70                                                     | 19                | 15.0 | 0          | 0.0  | 1                          | 14.3 | 0          | 0.0   |
| 80                                                     | 26                | 20.5 | 0          | 0.0  | 0                          | 0.0  | 1          | 5.3   |
| 90                                                     | 17                | 13.4 | 0          | 0.0  | 2                          | 28.6 | 1          | 5.3   |
| TOTAL                                                  | 127               | 100  | 4          | 100  | 7                          | 100  | 19         | 100.0 |
| % TOTAL                                                | 80.9              |      | 2.5        |      | 4.5                        |      | 12.1       |       |
| TOTAL GENERAL = 157 TORMENTAS                          |                   |      |            |      |                            |      |            |       |
| % DE EVENTOS ENTRE EL PRIMER Y SEGUNDO CUARTIL: 83.4 % |                   |      |            |      |                            |      |            |       |

Cuadro III.8.

eventos indicados se ajustan a este patrón interno, la curva del 10 % de probabilidad acumulan el 50 % de estas tormentas.

Para la curvas con tendencias al tercer cuartil, entre las curvas del 90 %, 10 % y 20 % se agrupa el 57 % de las tormentas en este cuartil. Las curvas de 10 %, 20 % y 30 % de probabilidad acumulan un total de 84% de tormentas en el cuarto cuartil. Entre el tercero y cuarto cuartil se acumula el 16.6 % de las 157 tormentas indicadas (Cuadro III.8).

#### III.3.4. COMPARACION DEL PESO DEL CUARTIL EN FUNCION DEL INTERVALO DE DURACION Y LAS ABSTRACCIONES INICIALES

En la Fig. III.8. se indica el cambio que existe en el porcentaje para cada cuartil (peso del cuartil en el que se verifica la intensidad máxima) con relación a los diferentes intervalos de duración de tormenta encontrados. De esto, se observa que el peso del primer cuartil domina sobre los restantes en cualquier intervalo de duración estudiado y por lo tanto en el intervalo de duración completo.

Debido a que las tormentas con intensidad máxima entre el tercero y cuarto cuartil no representan sino el 23.3 % de todas las tormentas registradas, el estudio centrará el análisis en el primero y segundo cuartil, los cuales, acumulan el restante 76.7 %.

Las tormentas con duraciones menores se caracterizan porque su porcentaje en el primero y segundo cuartil, es prácticamente igual a la suma del porcentaje de las duraciones medias y altas conjuntamente, en otras palabras, la mitad de las tormentas con intensidad máxima en el primero o en el segundo cuartil tienen

duraciones menores.

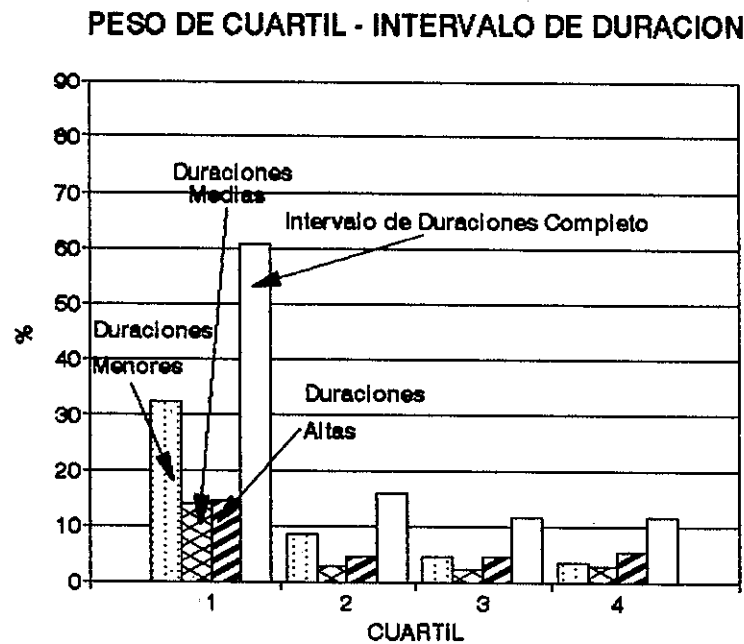

Fig. III.8.

La relación de los porcentajes entre el primero y segundo cuartil es aproximadamente: 4 a 1 ( 60.8 % / 15.9 % ), este concluyente resultado indica el gran peso total de las tormentas registradas en la estación Quito-Observatorio con máxima intensidad en el primer cuartil, representando el 60.8 % de todas las tormentas registradas.

En relación al cambio del peso del cuartil según el aumento de las abstracciones iniciales (Fig. III.9.), se observa la tendencia al aumento de los patrones internos de tormenta hacia el primer cuartil en función del aumento de las abstracciones iniciales. Con esto, las tormentas tenderían a ser cada vez más severas y prácticamente sus intensidades máximas se encontrarían en el primer cuartil.

PESO DE CUARTIL SEGUN % DE PERDIDAS

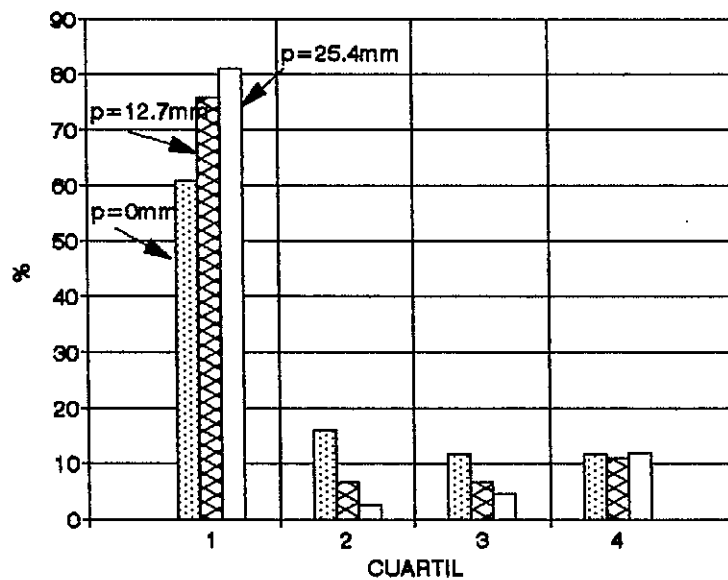

Fig. III.9.

A continuación se hace un resumen de los principales resultados encontrados tanto en los tres estados de abstracciones iniciales asumidos (Cuadro III.9.), como en los tres intervalos de duraciones encontrados.

| Abstracciones<br>iniciales | Duraciones | N. de<br>Tormentas | %<br>Total | Dmin.<br>(min.) | Dmax.<br>(min.) | Cuartil |      |      |      |       |
|----------------------------|------------|--------------------|------------|-----------------|-----------------|---------|------|------|------|-------|
|                            |            |                    |            |                 |                 | N.1     | N.2  | N.3  | N.4  | Total |
|                            |            |                    |            |                 |                 | %       | %    | %    | %    | %     |
| 0 (mm)                     | Menores    | 136                | 49         | 35              | 499             | 66.0    | 17.0 | 10.0 | 7.0  | 100   |
|                            | Medias     | 69                 | 22         | 510             | 760             | 63.5    | 12.7 | 11.1 | 12.7 | 100   |
|                            | Altas      | 82                 | 29         | 760             | 1920            | 50.0    | 16.0 | 16.0 | 16.0 | 100   |
|                            | Total      | 283                | 100        | 35              | 1920            | 61.0    | 16.0 | 11.7 | 11.7 | 100.4 |
| 12.7 (mm)                  | Total      | 272                | 100        | 16              | 1411            | 76.0    | 6.6  | 6.6  | 11.0 | 100.2 |
| 25.4 (mm)                  | Total      | 157                | 100        | 3               | 1348            | 81.0    | 2.5  | 4.5  | 12.1 | 100.1 |

Cuadro III.9.

## CAPITULO IV

### DINAMICA DE LAS TORMENTAS

#### IV.1. TRAYECTORIA Y VELOCIDADES MEDIAS PRINCIPALES

Es necesario hacer una distinción entre lo que es movimiento de tormentas y movimiento del patrón de tormenta. Generalmente al referirse a movimientos de tormentas se considera al movimiento debido a factores meteorológicos existentes en la región de estudio, que ocasionan traslados de las masas de aire húmedas, que se precipitan en un sector específico. Cuando se hace referencia al movimiento de patrones de tormenta, se habla del cambio del comportamiento interno de la tormenta con el desplazamiento areal. Este concepto es de mayor importancia en el estudio de modelos precipitación-escorrentía. En el presente estudio los dos tipos de conceptos son analizados y relacionados.

##### IV.1.1. COMPORTAMIENTO DE LAS TORMENTAS

###### IV.1.1.a. NUBES TERMICAS Y CONVECTIVAS

Si se toma un recipiente que contiene una delgada capa de un fluido y se lo calienta desde la parte inferior (o se lo enfría desde la parte superior), se producen algunos fenómenos importantes. En primer lugar, el calor entregado es transportado hacia arriba por acción molecular, y casi no se observa movimiento en el seno del fluido. Al mismo tiempo, la diferencia de temperatura entre la base y el nivel superior del fluido se hace mayor. Cuando esta diferencia alcanza un cierto valor crítico, el fluido comienza a moverse hacia arriba y hacia abajo según un modelo sistemático. Con fines didácticos, se puede

considerar a la superficie del fluido constituida por un sistema de exágonos iguales, en cuyo centro el fluido asciende para descender en los bordes. Cada uno de los sistemas exagonales se denomina célula; a este fenómeno se lo conoce como convección, y se lo utiliza para expresar la transferencia de calor u otra propiedad en el eje vertical, cuando la transmisión de la propiedad es en sentido horizontal, al fenómeno se lo denomina advección.

Para la convección, es requisito previo una diferencia de temperatura entre la capa superior o inferior del fluido; si se divide esta diferencia de temperatura para el espesor de la capa, se obtiene el denominado gradiente vertical de temperatura. Esta cantidad es positiva cuando decrece con la altura y en caso contrario su signo es negativo. Cuando el fluido alcanza un valor crítico en su gradiente de temperatura, el fluido se hace inestable y comienza la convección.

Si el fluido además de tener convección, tiene al mismo tiempo advección, demostrada en un cambio de la velocidad del fluido con el aumento de la altura, el se comportará de manera distinta, en este caso, las células regularmente espaciadas son reemplazadas por una serie de rollos orientados en la dirección de la corriente advectiva. El fluido asciende a lo largo de ciertas líneas y desciende en las áreas adyacentes.<sup>10</sup>

#### IV.1.1.b. CONVECCION EN AIRE CLARO

En días de sol la radiación solar calienta la superficie del suelo. La transferencia de calor desde el suelo produce el calentamiento de las capas inferiores del aire adyacente. También



las capas bajas se calientan por la absorción directa de la radiación solar por parte del vapor de agua. A causa de su continuo calentamiento se puede desarrollar la inestabilidad del aire. Por inestabilidad se debe entender que, si una capa de parcela de aire es desplazada de una posición de equilibrio, continuará moviéndose con una aceleración cada vez mayor. Por otra parte en una situación estable, una parcela que es desplazada de su posición de equilibrio y luego liberada, volverá a su nivel original.

Con lo anteriormente dicho, para que exista inestabilidad debe existir una fuerza ascendente que la produzca. Esto puede cumplirse de dos maneras: 1) La parcela debe estar a mayor temperatura o 2) debe contener más vapor de agua, esta segunda condición responde simplemente al hecho de que, el peso molecular del vapor de agua es menor que el del aire seco. El primero es alrededor de 18 y el segundo de 29. Si la presión y temperatura son constantes, un cierto volumen de aire húmedo será  $29/18$  veces más liviano que el aire seco.

Para que la atmósfera sea inestable, no basta simplemente con que la temperatura disminuya con la altura. De ser así, el aire sería generalmente inestable, puesto que la temperatura casi siempre disminuye con la altura. La inestabilidad tiene lugar cuando la parcela, que asciende en un volumen de aire poseedora de un gradiente de temperatura positivo determinado está a mayor temperatura que el aire que lo rodea. Cuando la parcela asciende, penetra en regiones de presión continuamente decrecientes, lo cual produce una expansión y el consiguiente enfriamiento. Si no hay pérdida ni entrega de calor al medio exterior y durante el proceso no se produce condensación, la temperatura de la parcela

disminuye a razón de  $10^{\circ}\text{C}$  por kilómetro de ascenso, este decrecimiento se conoce como el gradiente adiabático. Para la parcela se mantenga más caliente que el medio circundante, es necesario que el gradiente de temperatura del medio sea mayor al adiabático seco. El ascenso de la parcela se producirá hasta que su temperatura iguale al medio externo, aunque por efecto de la inercia, este ascenso continúa en algunos pocos cientos de metros más.

#### IV.1.1.c. CONVECCION EN AIRE HUMEDO

Una parcela de aire que asciende se enfría por expansión. El enfriamiento se traduce en un aumento de la humedad relativa del aire. Si existe suficiente contenido de humedad en la parcela y el ascenso es suficientemente alto, la humedad se aproxima al ciento por ciento, en cuyo caso comienza la condensación. En este punto la nube se hace visible. Se produce una liberación de calor que aumenta la temperatura de la parcela. Este efecto tiende a compensar parcialmente el enfriamiento por expansión. Si la parcela continua ascendiendo su decrecimiento de temperatura será ahora de unos  $5.5^{\circ}\text{C}$  por kilómetro de ascenso, este gradiente se lo denomina adiabático húmedo.

Una vez que comienza la condensación, las condiciones para la inestabilidad se hacen menos restringidas. Excepto en capas delgadas cerca de la superficie del suelo, los gradientes que superan al adiabático seco son muy raros. En cambio son muy comunes los gradientes mayores al adiabático húmedo.

En este punto, se producen volúmenes de aire que ascienden con velocidades que pueden variar entre unos pocos centímetros

a que la diferencia de temperatura entre la parcela y el medio que lo rodea aumenta con la altura, esta altura puede llegar a más de 10000 metros.

Una parcela de aire de una nube, que asciende a razón de 1 metro por segundo a nivel de la base de la nube (Ej. a unos 1500 metros de altura), puede alcanzar velocidades ascensionales del orden de 25 metros por ~~minuto~~<sup>SEGUNDO</sup> y aun mayores cuando llegue a los 8000 metros. De este modo pequeñas cúmulos crecen rápidamente hasta hacerse cúmulos congestus y éstos, a su vez pueden desarrollarse hasta ser cumulonimbus, también llamados nubes de tormenta.

No es difícil encontrar nubes de tormenta que alcanzan alturas superiores a los 12000 metros y algunas observaciones de radar han determinado topes de tormenta excepcionales alcanzando alturas superiores a los 20000 metros.<sup>10</sup>

Cuando la nube de tormenta alcanza un estrato de aire estable (tropopausa), pronto se encuentra en una región en la cual está más fría que el medio exterior. Como ahora es más pesada que el medio exterior, existe una fuerza exterior que se impone sobre ella, y detiene su crecimiento.

#### IV.1.1.d. TORMENTAS DE ORIGEN OROGRAFICO

Las cadenas montañosas que atraviesan el continente y a su vez al Ecuador, se encuentran en forma perpendicular a las direcciones de vientos predominantes en la región, éstas actúan como una barrera ante los vientos provenientes de occidente y oriente.

Para la formación de nubes de tormenta en las gargantas y

hoyas en la región interandina, dos fenómenos de diferente naturaleza pero de igual efecto intervienen. El primero consiste en el estancamiento de humedad proveniente del occidente debido al desplazamiento que sufre la corriente de Humboldt, por la corriente cálida del niño. El segundo y no por ello menos importante, consiste en el estancamiento debido al aporte de humedad proveniente de la fuerte expansión adiabática de la región oriental del país, esta expansión produce nubes cumulonimbos que llegan a alturas superiores a los 10000 metros, con lo que fácilmente atraviesan la cordillera occidental. Estos dos fenómenos juntamente con las características topográficas de las múltiples hoyas interandinas, han producido que en ellas se formen microclimas de características muy especiales y no fáciles de identificar y muestrear.

#### IV.1.1.e. TEORIA COLUMNAR DE LAS TORMENTAS

De la investigación de tormentas, realizada entre 1945 y 1950 "Proyecto de tormentas"<sup>10</sup>, se llegó a la conclusión de que las tormentas están <sup>FORMADAS</sup> por una o varias células, cada una de las cuales tiene un bien definido tiempo de vida. Durante la primera parte de la historia de la célula el movimiento del aire es casi enteramente ascendente y aunque en gran proporción el aire que constituye la nube proviene de las capas situadas por debajo de la base de ésta, también se produce aporte a los lados de la nube. Mientras dura esta etapa, conocida como la etapa cumuliforme, las nubes crecen rápidamente y las velocidades ascendentes aumentan. El crecimiento de la nube está acompañada por el crecimiento de <sup>elementos</sup> eventos de precipitación. Cuando estos elementos

son suficientemente grandes, su peso se hace significativo, y ejercen suficiente resistencia al ascenso como para obligar a una parte del aire de la nube a iniciar el descenso. Este se considera el comienzo de la llamada etapa de madurez.

Una vez que la corriente descendente se ha generado, se acelera rápidamente, y al enfriarse el aire por la evaporación de la precipitación, adquiere mayor densidad y peso que el aire exterior de la nube.

Durante el estado de madurez, los movimientos verticales, tanto ascendentes como descendentes, son más severos. Una parte de la nube se eleva con velocidad máxima mientras que, al mismo tiempo, otra parte de ella, cada vez mayor, está descendiendo con intensidad cada vez máxima.

En la etapa de madurez, una tormenta se caracteriza por la máxima precipitación, efectos eléctricos y ráfagas en la superficie del suelo.

A medida que la corriente descendente crece dentro de la nube disminuye gradualmente la energía proporcionada por la corriente ascendente. Cuando toda la nube está constituida por aire descendente, la tormenta alcanza su etapa final de disipación.

En este momento, tanto la intensidad de la turbulencia, como la precipitación y la actividad eléctrica han disminuido; todo lo que resta es una gran masa vellosa de nubes que comienza a evaporarse con rapidez.

Se supone que cada célula tiene un diámetro de unos pocos kilómetros y dura algo menos de una hora. Sin embargo, una tormenta intensa puede estar constituida por muchas células, cada una de ellas en diferente estado de desarrollo. Cuando una célula

se disipa otra nueva se desarrolla, y de esta manera una tormenta puede durar muchas horas.<sup>10</sup>

#### IV.1.2. MOVIMIENTO DE TORMENTAS

Autores citados en la bibliografía correspondiente, han escogido diferentes características cualitativas temporales de tormenta para estudiar su movimiento, entre éstas, se puede señalar:

- Hora de Intensidad máxima.
- Hora de Inicio de tormenta.
- Hora en la cual un porcentaje específico de lluvia es obtenido.
- Hora del centroide del hietograma.

Con respecto a la primera característica (hora de intensidad máxima), necesariamente se la debe asociar a un intervalo de duración. Como es bien conocido, en el desarrollo de una tormenta se producen fuertes ráfagas de ida y vuelta, la hora de registro de intensidad máxima entre estaciones no acredita el movimiento de tormenta, debido a que la intensidad máxima se puede registrar en diferentes ráfagas (Fig. IV.3.) y con esto, no indicar el movimiento principal de la tormenta o su magnitud principal (velocidad). En relación con la hora de inicio de tormenta, este es un punto más de identificación del pluviograma, como se observará más adelante, este punto puede ser válido o no válido para la identificación del movimiento, lo cual se definirá en la forma del pluviograma.

Comentarios parecidos se pueden hacer de las restantes

características temporales. Así, se puede señalar; que resulta un análisis muy frío para un fenómeno tan dinámico y en el que intervienen tantos procesos, el escoger estrictamente una característica u otra para denotar el movimiento de tormenta. Es así, que como método seleccionado para el presente análisis es:

- 1.- La observación de los diferentes y claros puntos de cambios de la intensidad de la curva pluviográfica, los cuales denotan el traslado del cambio de subfenómenos (proceso limitado por cambios importantes en la intensidad de lluvia) de una estación a otra.
- 2.- La selección del subfenómeno que prima en cuanto a su cantidad de precipitación (Ej. Subfenómeno EF, Fig. IV.3.)
- 3.- Obtención de la máxima intensidad reconocida en dicho subfenómeno y la hora en que registra.
- 4.- Cálculo de las velocidades de movimiento de tormenta entre las estaciones.
- 5.- Selección de los tipos de tormentas principales, basado estrictamente en la analogía de direcciones de movimiento. Las velocidades entre estaciones se considerarán como la media entre todas las tormentas observadas en cada caso.
- 6.- Para el estudio del movimiento de patrón interno, es necesario hacer un análisis cuantitativo y cualitativo de dichos movimientos, de tal manera que, el cuartil y probabilidad registrados en la estación de llegada también dependerán de el cuartil y probabilidad de la tormenta registrada en la estación de salida y no solamente de los datos observados. El método utilizado consistirá en evaluar el número de niveles (% de probabilidad de excedencia) que sube o baja el cuartil de llegada

con respecto al de salida. El promedio de dichos valores se ha aumentado o disminuido según el caso, al cuartil de llegada para escogerlo como representativo.

7.- Para el cálculo de la velocidad y dirección de tormenta, se utilizará el método de las tres estaciones<sup>11</sup>, el cual consiste en considerar al movimiento de tormenta como lineal y uniforme, así, se utilizarán la velocidad promedio entre estaciones de registro y bastara con imponer un tiempo de inicio de tormenta. Para que el movimiento sea lineal, es necesario hacer ajustes de las velocidades promedios, de esta manera habrá una pequeña diferencia entre las velocidades calculadas y las sugeridas. Un ejemplo del método de las tres estaciones se indica en la Fig.IV.1., los puntos A, B, y C, representan las localización espacial de las tres estaciones, los puntos B' y C' indican la posición a los tiempos B y C respectivamente en los cuales la tormenta se registraría si continua desplazándose uniformemente.

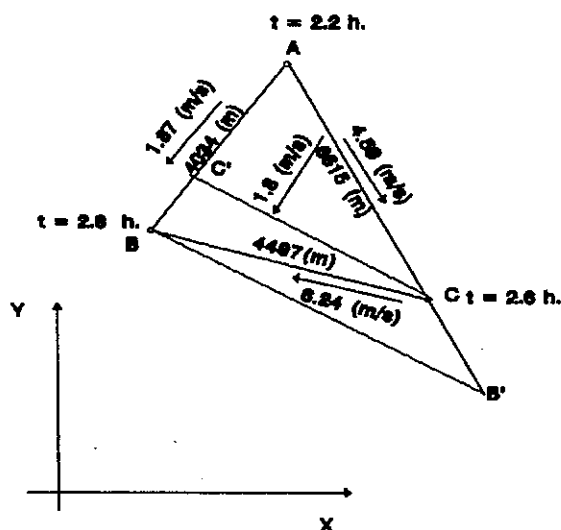

Fig. IV.1., Método de las tres estaciones



La localización, la topografía y las características climáticas de los alrededores de la Hoya de Quito, condicionan las direcciones de tormentas principales. El estudio del capítulo anterior permite ahora la distinción entre tormentas de origen local y tormentas de origen regional, con motivo de estudio la única diferencia entre las dos clases de tormenta es la duración. Según la ecuación [4], tormentas de duraciones menores son las más severas, por esta razón se tratará de encontrar un patrón específico de movimiento de tormenta para este rango de duraciones.

#### IV.1.3. ESTACIONES UTILIZADAS Y SELECCION DE TORMENTAS

Considerando el estudio detallado de los hietogramas críticos realizados para la estación Quito-Observatorio, las tormentas han sido seleccionadas en función de las máximas precipitaciones registradas en esta estación.

La fecha del inicio de observaciones así como las coordenadas y cotas de las estaciones utilizadas se indican en el Cuadro IV.1, a la vez, la Fig. IV.2. indica la situación geográfica. Las distancia existentes entre las estaciones seleccionadas se indican en el Cuadro IV.2.

| N | Estacion        | Inicio de Observaciones | Longitud(W) |    |    | Latitud(S) |    |    |
|---|-----------------|-------------------------|-------------|----|----|------------|----|----|
|   |                 |                         | o           | '  | "  | o          | '  | "  |
| 1 | Q. Observatorio | 1891                    | 78          | 30 | 0  | 0          | 12 | 40 |
| 2 | Izobamba        | 1967                    | 78          | 33 | 5  | 0          | 21 | 45 |
| 3 | Inaquito        | 1975                    | 78          | 28 | 55 | 0          | 10 | 29 |
| 4 | Tola            | 1977                    | 78          | 24 | 0  | 0          | 13 |    |
| 5 | Chorrera        | 1977                    | 78          | 32 | 6  | 0          | 12 | 6  |
| 6 | Aeropuerto      | 1959                    | 78          | 29 | 16 | 0          | 8  | 24 |

Cuadro IV.1

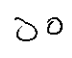

| Estacion<br>Partida   | Estacion<br>Llegada | Salida   |         | Llegada  |         | Distancia<br>(m) |
|-----------------------|---------------------|----------|---------|----------|---------|------------------|
|                       |                     | longitud | latitud | longitud | latitud |                  |
| Quito<br>Observatorio | Izobamba            | 8738731  | 23339.3 | 8744452  | 40076.1 | 17687            |
|                       | Inaquito            |          |         | 8736721  | 19316.4 | 4497             |
|                       | Tola                |          |         | 8727599  | 23953.5 | 11149            |
|                       | DAC.                |          |         | 8737371  | 15477.7 | 7979             |
|                       | Chorrera            |          |         | 8742628  | 22295.2 | 4034             |
| Inaquito              | Aeropuerto          | 8736721  | 19316.4 | 8737371  | 15477.7 | 3893             |
|                       | TOLA                |          |         | 8727599  | 23953.5 | 10233            |
|                       | Chorrera            |          |         | 8742628  | 22295.2 | 6615             |
| DAC.                  | Tola                | 8737371  | 15477.7 | 8727599  | 23953.5 | 12935            |
|                       | Chorrera            |          |         | 8742628  | 22295.2 | 8609             |
| Izobamba              | Tola                | 8744452  | 40076.1 | 8727599  | 23953.5 | 23323            |
|                       | Chorrera            |          |         | 8742628  | 22295.2 | 17874            |

Cuadro IV.2.

En función de imprevistos en cuanto a la obtención de datos pluviográficos y según lo mencionado en el análisis de los datos del capítulo II, se han seleccionado las cuatro tormentas anuales con mayor precipitación en 24 horas en un período de registro desde 1980 hasta 1992.

La selección de tormentas basado en el criterio anterior, no implica que necesariamente se debe registrar en las otras estaciones alturas de precipitación del mismo orden de las registradas en la estación Quito - Observatorio, aún más, no necesariamente implica que se debe registrar alguna altura de precipitación.

Tormentas de origen local que se caracterizan por cortas duraciones y en muchos casos fuertes precipitaciones pueden ser registradas en una sola estación y no en las otras. Este es el caso de la tormenta del 7 de Noviembre de 1983, la cual solamente ha producido registro en la estación Quito - Observatorio. Lamentablemente esta característica no es útil en el estudio del

movimiento de tormentas, por lo que este tipo de tormentas son descartadas del estudio, así, se han seleccionado 38 tormentas.

El Cuadro IV.3 indica el registro de tormentas con la altura de precipitación respectiva en cada estación.

| Fecha de tormenta |      |     |     | Estacion  |          |          |      |          |            |
|-------------------|------|-----|-----|-----------|----------|----------|------|----------|------------|
| N                 | Año  | Mes | Día | Q. Obser. | Izobamba | Inaquito | Tola | Chorrera | Aeropuerto |
| 1                 | 1992 | 12  | 20  | 35.4      | —        | 22.6     | 0    | —        | —          |
| 2                 | 1991 | 11  | 25  | 29        | 0        | 6.6      | 13.5 | —        | —          |
| 3                 | 1991 | 3   | 23  | 21.2      | 12.5     | 0        | 1.5  | —        | —          |
| 4                 | 1991 | 3   | 11  | 34        | 11.2     | 12.7     | 0.3  | —        | —          |
| 5                 | 1991 | 1   | 11  | 20.2      | 26       | 0        | 29.5 | —        | —          |
| 6                 | 1989 | 9   | 25  | 34.8      | 22.6     | 37.8     | 0    | —        | —          |
| 7                 | 1989 | 9   | 22  | 29.8      | 3.4      | 2.5      | 0    | —        | —          |
| 8                 | 1989 | 8   | 23  | 27.2      | 0        | 10.9     | 0    | —        | —          |
| 9                 | 1989 | 4   | 26  | 34.7      | 12       | 22.8     | 0    | —        | —          |
| 10                | 1987 | 9   | 6   | 27.3      | 12.5     | 14.2     | 9.9  | —        | —          |
| 11                | 1987 | 5   | 22  | 44.6      | 23       | 19       | 29.2 | —        | —          |
| 12                | 1987 | 5   | 6   | 33.2      | 5.9      | 7.9      | 1.9  | —        | —          |
| 13                | 1987 | 1   | 19  | 36.4      | 3        | 12.6     | 2.5  | —        | —          |
| 14                | 1986 | 12  | 23  | 34.6      | 5.6      | 9.5      | 0    | —        | 1.6        |
| 15                | 1986 | 11  | 17  | 55.3      | 20.6     | 8.2      | 9    | —        | 3.6        |
| 16                | 1986 | 4   | 9   | 28        | 0        | 18       | 9    | —        | —          |
| 17                | 1986 | 3   | 12  | 29        | 23       | 30       | 21.5 | —        | —          |
| 18                | 1985 | 12  | 26  | 21.9      | 16.9     | 0        | 0    | —        | —          |
| 19                | 1985 | 10  | 9   | 22.3      | 5.6      | 9.4      | 2.1  | —        | 2.8        |
| 20                | 1985 | 5   | 10  | 25        | 66       | 0        | 44.3 | —        | —          |
| 21                | 1985 | 5   | 5   | 20.25     | 5.4      | 0        | 1.6  | —        | 4.1        |
| 22                | 1984 | 8   | 20  | 32.3      | 11.3     | —        | 9.8  | 10       | 13.3       |
| 23                | 1984 | 4   | 30  | 25.1      | 20       | —        | 4.3  | 31.5     | 12.4       |
| 24                | 1984 | 2   | 16  | 32        | 15.4     | —        | 7    | 9.3      | 7          |
| 25                | 1984 | 2   | 10  | 27.5      | 11.4     | —        | 0.4  | 10       | 7.9        |
| 26                | 1983 | 8   | 30  | 41.3      | 7.8      | 64.1     | 1.4  | —        | —          |
| 27                | 1983 | 5   | 24  | 35.4      | 8.1      | 17.4     | 2.5  | —        | —          |
| 28                | 1983 | 3   | 14  | 42.4      | 8.5      | 0        | 1.8  | —        | —          |
| 29                | 1982 | 12  | 7   | 30.7      | 9        | 28.3     | 2.8  | 6.8      | 17.8       |
| 30                | 1982 | 11  | 19  | 22.8      | 1.1      | 2.8      | 5.5  | 18.1     | 1.9        |
| 31                | 1982 | 10  | 4   | 34.1      | 0.6      | 7        | 2.8  | 19.6     | 15.5       |
| 32                | 1982 | 9   | 19  | 37.5      | 3.6      | 9.5      | 2.2  | 18       | 15.6       |
| 33                | 1981 | 12  | 29  | 32        | 0        | 0        | 17.5 | —        | —          |
| 34                | 1981 | 8   | 23  | 31.7      | 0        | 3        | 3.6  | —        | —          |
| 35                | 1981 | 3   | 21  | 26.7      | 4        | 14.3     | 20.7 | —        | —          |
| 36                | 1980 | 12  | 26  | 51.6      | 1.4      | 4        | 13.1 | 12.7     | —          |
| 37                | 1980 | 11  | 28  | 36.4      | 1.2      | 6.8      | 44.2 | 12.8     | —          |
| 38                | 1980 | 10  | 20  | 32.1      | 10.2     | 2.5      | 6.1  | 7.4      | —          |

— Dato no disponible

Cuadro IV.3.

#### IV.1.4. ANALISIS DE MOVIMIENTOS PRINCIPALES

La tormenta registrada el 22 de mayo de 1987 ayuda a visualizar sus características. Esta tormenta es una de las más interesantes, y registra claramente los movimientos de los subfenómenos internos. En la Fig. IV.3., se indican los pluviogramas registrados correspondientes a esta tormenta.

PLUVIOGRAMAS REGISTRADOS  
TORMENTA: 1987-05-22

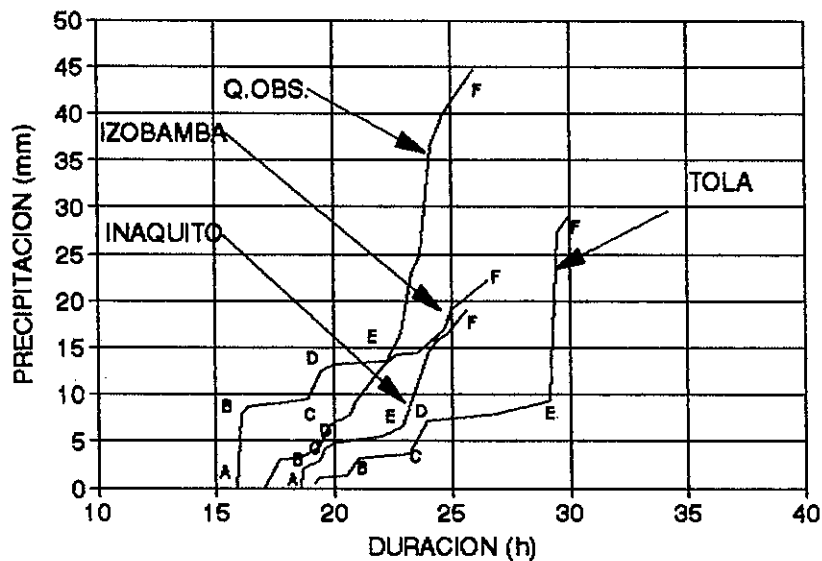

Fig. IV.3.

De este evento de tormenta, se han obtenido los datos básicos como son; duración, altura de precipitación, hora de inicio, hora de fin, hora en que se verifican puntos de quiebre de intensidad, hora de intensidad máxima (la intensidad máxima es obtenida del subfenómeno EF). Estos datos se indican en el Cuadro IV.4 y IV.5.

| Estacion | Duracion<br>(min) | Precipitacion<br>(mm) | Hora de<br>Inicio | Hora de<br>Fin | Cuartil | %  |
|----------|-------------------|-----------------------|-------------------|----------------|---------|----|
| Q.Obs.   | 610               | 44.6                  | 15:49:58          | 26:00:00       | 4       | 20 |
| Izobamba | 570               | 23                    | 17:00:00          | 26:30:00       | 4       | 10 |
| Inaquito | 425               | 19                    | 18:34:59          | 25:40:00       | 4       | 10 |
| Tola     | 649               | 26.7                  | 19:10:00          | 30:00:00       | 4       | 60 |

Cuadro IV.4.

| Punto                           | Hora de registro segun estacion |        |       |        | Tiempo de movimiento entre<br>Estaciones (h.) |          |          |       |
|---------------------------------|---------------------------------|--------|-------|--------|-----------------------------------------------|----------|----------|-------|
|                                 | Q.Obs.                          | Izob.  | Inaq. | Tola   | Q.obs                                         | Q.obs    | Inaquito | Q.obs |
|                                 |                                 |        |       |        | Izobamba                                      | Inaquito | Tola     | Tola  |
| Inicio=A                        | 15.83                           | 17.00  | 18.58 | 20.53  | 1.17                                          | 2.75     | 1.95     | 4.70  |
| B                               | 16.21                           | 17.67  | 18.67 | 21.00  | 1.46                                          | 2.46     | 2.33     | 4.79  |
| C                               | 18.83                           | 19.85  | 19.42 | 23.17  | 1.02                                          | 0.59     | 3.75     | 4.33  |
| D                               | 19.75                           | 20.80  | 19.79 | 23.92  | 1.05                                          | 0.04     | 4.13     | 4.18  |
| E                               | 22.25                           | 23.41  | 22.46 | 28.17  | 1.15                                          | 0.21     | 5.71     | 5.92  |
| Fin=F                           | 26.00                           | 26.50  | 25.67 | 30.00  | 0.50                                          | -0.33    | 4.33     | 4.00  |
| Imax.                           | 23.46                           | 20.775 | 23.5  | 28.833 | 2.69                                          | 0.04     | 5.33     | 5.37  |
| Tiempo de llegada promedio (h.) |                                 |        |       |        | 1.29                                          | 0.82     | 3.93     | 4.75  |
| Velocidad Promedio (h.)         |                                 |        |       |        | 3.81                                          | 1.52     | 0.72     | 0.65  |

Cuadro IV.5.

El claro e interesante proceso acelerado que se observa entre la estación Quito Observatorio y la estación Iñaquito indican una homogeneización del fenómeno sobre toda el área de cobertura de tormenta; se podría hablar de una onda de expansión acelerada tendiente a homogeneizar el fenómeno. Se debe notar que el punto coincidente F, indicaría que la onda llega a un máximo de expansión y posteriormente retrocede produciéndose una onda negativa o con efecto inverso que ahora a su paso causa el fin de tormenta. Situaciones similares se han registrado en 23 de las

38 tormentas registradas, de las cuales se hace un resumen en el Cuadro IV.6.

| Fecha de tormenta |      |     |     | Estacion |          |           |      |          |            |
|-------------------|------|-----|-----|----------|----------|-----------|------|----------|------------|
| N                 | Año  | Mes | Día | Q.Obser. | Izobamba | Inaquillo | Tola | Chorrera | Aeropuerto |
| 1                 | 1991 | 11  | 25  | 29       | 0        | 6.6       | 13.5 | ---      | ---        |
| 2                 | 1991 | 3   | 23  | 21.2     | 12.5     | 0         | 1.5  | ---      | ---        |
| 3                 | 1991 | 3   | 11  | 34       | 11.2     | 12.7      | 0.3  | ---      | ---        |
| 4                 | 1991 | 1   | 11  | 20.2     | 26       | 0         | 29.5 | ---      | ---        |
| 5                 | 1989 | 9   | 25  | 34.8     | 22.6     | 37.8      | 0    | ---      | ---        |
| 6                 | 1989 | 9   | 22  | 29.8     | 3.4      | 2.5       | 0    | ---      | ---        |
| 7                 | 1987 | 9   | 6   | 27.3     | 12.5     | 14.2      | 9.9  | ---      | ---        |
| 8                 | 1987 | 5   | 22  | 44.6     | 23       | 19        | 29.2 | ---      | ---        |
| 9                 | 1987 | 5   | 6   | 33.2     | 5.9      | 7.9       | 1.9  | ---      | ---        |
| 10                | 1987 | 1   | 19  | 36.4     | 3        | 12.6      | 2.5  | ---      | ---        |
| 11                | 1986 | 12  | 23  | 34.6     | 5.6      | 9.5       | 0    | ---      | 1.6        |
| 12                | 1986 | 4   | 9   | 28       | 0        | 18        | 9    | ---      | ---        |
| 13                | 1986 | 3   | 12  | 29       | 23       | 30        | 21.5 | ---      | ---        |
| 14                | 1985 | 12  | 26  | 21.9     | 16.9     | 0         | 0    | ---      | 13.20      |
| 15                | 1985 | 10  | 9   | 22.3     | 5.6      | 9.4       | 2.1  | ---      | 2.8        |
| 16                | 1984 | 2   | 10  | 27.5     | 11.4     | ---       | 0.4  | 10       | 7.9        |
| 17                | 1983 | 8   | 30  | 41.3     | 7.8      | 64.1      | 1.4  | ---      | ---        |
| 18                | 1983 | 5   | 24  | 35.4     | 8.1      | 17.4      | 2.5  | ---      | ---        |
| 19                | 1983 | 3   | 14  | 42.4     | 8.5      | 0         | 1.8  | ---      | ---        |
| 20                | 1982 | 12  | 7   | 30.7     | 9        | 28.3      | 2.8  | 6.8      | 17.8       |
| 21                | 1982 | 11  | 19  | 22.8     | 1.1      | 2.8       | 5.5  | 18.1     | 1.9        |
| 22                | 1981 | 12  | 29  | 32       | 0        | 0         | 17.5 | ---      | ---        |
| 23                | 1980 | 12  | 26  | 51.6     | 1.4      | 4         | 13.1 | 12.7     | ---        |

--- Dato no disponible

Cuadro IV.6

Realizando una comparación con la teoría columnar de las tormentas, que puntualiza el hecho de velocidades asencionales aceleradas y la notable expansión de las masas de aire húmedo debido a la disminución de presión del medio circundante, se llega a la conclusión que este fenómeno no solamente sucede en el plano vertical, sino que en la proyección areal de la tormenta

también suceden similares avances.

Del análisis de las direcciones de movimientos de las 38 tormentas (Anexo N°4), se han seleccionado cuatro direcciones principales de tormenta (DPT). Los Cuadros IV.7.a, IV.7.b, IV.7.c y IV.7.d, resumen los resultados e indican las velocidades y direcciones seleccionadas.

En cuanto al movimiento del patrón interno de tormenta, los Cuadros IV.8.a, IV.8.b, IV.8.c, IV.8.d indican los cuartiles y las probabilidades encontradas en el movimiento de los direcciones principales de tormenta.

En las Fig. IV.4, IV.5, IV.6 y IV.7 se indican las cuatro direcciones principales encontradas, las mismas que a su vez poseen el traslado de su patrón interno temporal y las velocidades medias de traslado.

Inicialmente se había pensado en la conformación de direcciones principales de movimientos de tormenta de acuerdo a las características topográficas y estacionales del año. Como se puede observar todas las DPT, pueden ocurrir en cualquier época lluviosa del año, sin registrarse ninguna ley que rijan tal o cual tipo de movimiento. Como es conocido, las tormentas durante los meses de abril y mayo tienen mucha influencia del clima existente en la Región Oriental<sup>12</sup>, por lo que en estos meses se debería registrar una DPT similar; al no ser este el caso, y por el análisis de las restantes temporadas, se verifica el efecto de la interrelación de las características topográficas propias de la Hoya de Quito y los procesos convectivos, llegándose a una multitud de efectos cuya representación espacio-temporal tiene las cuatro DPT señaladas con velocidades promedio y cambios en los patrones temporales internos, pero que no representan



## DIRECCION PRINCIPAL DE TORMENTA: 1

Velocidades promedio

| #                         | Fecha |     |     | VELOCIDADES PRINCIPALES (m/s) |        |        |         |        |       |         |        |        |         |        |       |
|---------------------------|-------|-----|-----|-------------------------------|--------|--------|---------|--------|-------|---------|--------|--------|---------|--------|-------|
|                           | ano   | mes | dia | Q. obs.                       |        |        | Q. obs. |        |       | Q. obs. |        |        | Q. obs. |        |       |
|                           |       |     |     | Izoba.                        | Chorr. | Tola   | Izoba.  | Chorr. | Tola  | Izoba.  | Chorr. | Tola   | Izoba.  | Chorr. | Tola  |
| 1                         | 1991  | 11  | 25  | 17687                         | 4034   | 11149  | 4497    | 7978   | 3893  | 10233   | 6815   | 17874  | 8809    | 12935  |       |
| 2                         | 1991  | 1   | 11  | 1.02                          |        | -1.39  | -1.20   |        | *3.02 |         |        |        |         |        |       |
| 3                         | 1989  | 9   | 25  | 3.18                          |        |        | -2.57   |        |       |         |        |        |         |        |       |
| 4                         | 1989  | 4   | 26  | 6.94                          |        |        | -4.33   |        |       |         |        |        |         |        |       |
| 5                         | 1987  | 9   | 6   | 6.94                          |        | -4.64  | -1.01   |        | *5.00 |         |        |        |         |        |       |
| 6                         | 1985  | 5   | 10  | 0.74                          |        | -2.35  |         | -0.98  |       |         |        |        |         |        | -3.78 |
| 7                         | 1984  | 8   | 20  | 4.15                          | -4.07  | -0.67  |         | -0.47  |       |         |        | 3.40   | -0.54   | -61.95 |       |
| 8                         | 1984  | 4   | 30  | 0.51                          | -6.23  | -12.39 |         | -2.46  |       |         |        | 0.51   | -3.32   | -5.53  |       |
| 9                         | 1982  | 12  | 7   | *307.07                       | 9.58   | -3.26  | 2.88    | -6.33  | 12.87 | -5.51   | 5.80   | *37.33 | -10.26  | *5.99  |       |
| 10                        | 1981  | 12  | 29  |                               |        | -0.83  |         |        |       |         |        |        |         |        |       |
| 11                        | 1981  | 8   | 23  |                               |        | -2.62  | -1.39   |        |       | -10.04  |        |        |         |        |       |
| Velocidad Promedio(m/s):  |       |     |     | 3.35                          | -6.83  | -3.52  | -2.23   | -2.56  | 12.87 | -7.78   |        | 1.96   | -4.71   | -23.75 |       |
| Velocidad Escogidas(m/s): |       |     |     | 3.35                          | -6.83  | -3.52  | -2.23   |        | 6.77  | -8.90   | 4.71   | 4.82   | -4.35   | -22.48 |       |

\* Datos considerados muy altos o no utiles en el estudio

Cuadro IV.7. a.

## DIRECCION PRINCIPAL DE TORMENTA: 2

Velocidades promedio

| #                         | Fecha |     |     | VELOCIDADES PRINCIPALES (m/s) |        |       |         |        |       |         |        |      |         |        |      |
|---------------------------|-------|-----|-----|-------------------------------|--------|-------|---------|--------|-------|---------|--------|------|---------|--------|------|
|                           | ano   | mes | dia | Q. obs.                       |        |       | Q. obs. |        |       | Q. obs. |        |      | Q. obs. |        |      |
|                           |       |     |     | Izoba.                        | Chorr. | Tola  | Izoba.  | Chorr. | Tola  | Izoba.  | Chorr. | Tola | Izoba.  | Chorr. | Tola |
| 1                         | 1992  | 12  | 20  |                               |        |       | 1.05    |        |       |         |        |      |         |        |      |
| 2                         | 1987  | 1   | 19  | -1.57                         |        | -1.11 | *28.39  |        |       | -1.00   |        |      |         |        |      |
| 3                         | 1986  | 12  | 23  | -2.18                         |        |       |         |        | 4.43  | 2.16    |        |      |         |        |      |
| 4                         | 1986  | 3   | 12  | -1.90                         |        | -1.51 | 2.88    |        |       | -1.14   |        |      |         |        |      |
| 5                         | 1985  | 12  | 26  | -10.61                        |        |       |         |        | 2.02  |         |        |      |         |        |      |
| 6                         | 1985  | 10  | 9   | *26.85                        |        | -2.28 | 1.96    | *1.63  | *0.54 | -1.42   |        |      |         |        |      |
| 7                         | 1983  | 8   | 30  | -5.78                         |        | -2.04 | 2.34    |        |       | -1.39   |        |      |         |        |      |
| Velocidad Promedio(m/s):  |       |     |     | -4.41                         |        | -1.74 | 2.06    | 3.23   | 2.16  | -1.24   |        |      |         |        |      |
| Velocidad Escogidas(m/s): |       |     |     | -4.41                         |        | -1.74 | 2.06    |        | 2.16  | -1.21   |        |      |         |        |      |

\* Datos considerados muy altos o no utiles en el estudio

Cuadro IV.7. b.

DIRECCION PRINCIPAL DE TORMENTA: 3

| #                         | Fecha |     |     | VELOCIDADES PRINCIPALES (m/s) |        |        |        |        |       |        |        |        |         |        |       |
|---------------------------|-------|-----|-----|-------------------------------|--------|--------|--------|--------|-------|--------|--------|--------|---------|--------|-------|
|                           | ano   | mes | dia | Q.oba.                        |        |        | Q.oba. |        |       | Q.oba. |        |        | Inequl. |        |       |
|                           |       |     |     | Izoba.                        | Chorr. | Tola   | Izoba. | Chorr. | Tola  | Izoba. | Chorr. | Tola   | Izoba.  | Chorr. | Tola  |
| 1                         | 1991  | 3   | 11  | -1.09                         |        | -0.50  | -0.50  |        | -0.50 |        |        | -0.78  |         |        |       |
| 2                         | 1989  | 9   | 22  | -2.36                         |        |        | -0.45  |        |       |        |        |        |         |        |       |
| 3                         | 1989  | 8   | 23  |                               |        |        | -2.50  |        |       |        |        |        |         |        |       |
| 4                         | 1987  | 5   | 22  | -3.53                         |        | -0.58  | *31.23 |        |       |        |        | -0.53  |         |        | *6.38 |
| 5                         | 1985  | 5   | 5   | -3.93                         |        | -2.17  |        |        | -1.11 |        |        |        |         |        |       |
| 6                         | 1984  | 2   | 16  | -8.43                         | 0.73   | -2.21  |        |        | -1.80 |        |        |        |         | -2.34  | -0.86 |
| 7                         | 1983  | 5   | 24  | -15.12                        |        | *12.39 | -2.99  |        |       |        |        | *4.26  |         |        |       |
| 8                         | 1982  | 11  | 19  | *29.54                        | 9.77   | -1.64  | -1.23  | -1.71  | *3.82 | -3.28  | 1.62   | -17.67 | -1.69   |        | 6.15  |
| 9                         | 1982  | 10  | 4   | -2.41                         | 4.20   | -1.65  | -0.80  | *3.74  | 0.50  | -8.88  | 1.01   | -2.15  | *7.36   |        | 1.46  |
| 10                        | 1982  | 9   | 19  | -19.65                        | 0.95   | *2.75  | -1.31  | -2.56  | 13.03 | *1.37  | 0.86   | -3.46  | -1.17   | *1.8   |       |
| 11                        | 1981  | 3   | 21  | -1.04                         |        | -3.10  | -0.26  |        |       | *0.76  |        |        |         |        |       |
| 12                        | 1980  | 12  | 26  | -2.73                         | *2.49  | -5.63  | -0.91  |        |       | *3.48  | 2.00   | -3.68  |         |        |       |
| Velo Promedio:            |       |     |     | -6.03                         | 3.91   | -2.19  | -1.22  | -1.80  | 6.77  | -3.97  | 1.37   | -5.86  | -1.24   | -2.06  | 9.71  |
| Velocidad Escogidas(m/s): |       |     |     | -6.03                         | 3.91   | -2.19  | -1.22  |        | 6.77  | -7.29  | 1.39   | -4.51  | -2.06   |        | 6.53  |

\* Datos considerados muy altos o no utiles en el estudio

Cuadro IV.7.c.

DIRECCION PRINCIPAL DE TORMENTA: 4

| #                         | Fecha |     |     | VELOCIDADES PRINCIPALES (m/s) |        |         |        |        |       |        |        |       |         |        |       |
|---------------------------|-------|-----|-----|-------------------------------|--------|---------|--------|--------|-------|--------|--------|-------|---------|--------|-------|
|                           | ano   | mes | dia | Q.oba.                        |        |         | Q.oba. |        |       | Q.oba. |        |       | Inequl. |        |       |
|                           |       |     |     | Izoba.                        | Chorr. | Tola    | Izoba. | Chorr. | Tola  | Izoba. | Chorr. | Tola  | Izoba.  | Chorr. | Tola  |
| 1                         | 1991  | 3   | 23  | 0.43                          |        | 0.47    |        |        |       |        |        |       |         |        |       |
| 2                         | 1987  | 5   | 6   | 3.98                          |        | 5.02    | *0.65  |        |       |        |        | *2.16 |         |        |       |
| 3                         | 1986  | 11  | 17  | 11.56                         |        | 3.64    | *24.98 | -3.59  | -1.62 | 3.55   |        | 2.24  |         |        | -2.45 |
| 4                         | 1986  | 4   | 9   |                               |        | 3.38    | -3.57  |        |       |        |        |       |         |        |       |
| 5                         | 1984  | 2   | 10  | 7.37                          | 65.92  | *182.17 | -0.42  |        |       |        |        |       | 7.64    | -0.45  | -0.68 |
| 6                         | 1983  | 3   | 14  | *96.26                        |        | *91.09  |        |        |       |        |        |       |         |        |       |
| 7                         | 1980  | 11  | 28  | *15.95                        | 8.96   | 4.7     | -1.11  |        |       |        |        | 1.6   | 1.47    | *11.47 |       |
| 8                         | 1980  | 10  | 20  | 6.70                          | *0.87  | 2.86    | -1.58  |        |       |        |        | 1.52  | *3.66   | 2.45   |       |
| Velocidad Promedio(m/s):  |       |     |     | 6.01                          | 37.44  | 3.35    | -2.09  | -2.01  | -1.62 | 2.23   | 1.47   | 5.05  | -0.45   | -1.57  |       |
| Velocidad Escogidas(m/s): |       |     |     | 6.01                          | 37.44  | 3.35    | -2.09  |        | -1.62 | 1.86   | 3.22   | 5.17  | -1.93   |        | -1.63 |

\* Datos considerados muy altos o no utiles en el estudio

Cuadro IV.7.d.

1

## Cambio del cuartil

**Nota:  $1/4 = \text{Cuartil}$**

**Nota:  $1/4 = \text{Cuartil}$**

**Cuadro IV.8.a.**

N

### Cambio del cuartil

**Nota:  $1/4 = \text{Cuartil}$**

**Nota:  $1/4 = \text{Cuartil}$**

**Cuadro IV.8.b.**

**Cuadro IV.8.d.**

direcciones propias de alguna época del año.

Las DPT encontradas, se caracterizan por que en su traslado hacia el centro de la tormenta, se da una atenuación del pluviograma<sup>en</sup> el tiempo, en otras palabras, existe un recorrido del cuartil hacia valores mayores, la probabilidad de excedencia también posee esta tendencia. Se debe tomar en cuenta lo dicho en el análisis de datos con respecto a que la estación Quito-Observatorio es utilizada para el registro de prácticamente el centro de la tormenta, por lo que todas las DPT caracterizan su recorrido por este hecho.

En el transcurso del proceso de precipitación existe una gran liberación de energía y, al observar las DPT, se concluye que la disminución de velocidad es un indicativo de la pérdida de energía durante el transcurso de la tormenta.

La DPT(1) se dirige desde el Sur hacia el Norte de la ciudad, la DPT(2) y DPT(3) atraviesan la barrera occidental de Quito en dirección Oeste a Este, la DPT(4) se caracteriza por su dirección de Sureste a Norte de la ciudad.

#### **IV.1.5. ANALISIS PARTICULAR DE LOS DESPLAZAMIENTOS PRINCIPALES**

##### **IV.1.5.a. DIRECCION PRINCIPAL DE TORMENTA N° 1**

Este movimiento de tormenta mantiene las características generales de otros movimientos, en el hecho, de existir una tendencia al cambio de cuartiles menores a mayores y de probabilidades de excedencia en el mismo sentido, durante el recorrido hacia al centro de tormenta y del centro de tormenta hacia el exterior. Las velocidades registradas son pequeñas, del orden de 2.4 m/s en promedio, y procesos acelerados provenientes

del sur se han registrado en su mayoría. La precipitación promedio de esta DPT, es del orden de 19 mm entre las estaciones en estudio, la duración promedio (418 min = 6.96 h) se encuentra entre las duraciones bajas indicadas en el capítulo III.

Esta DPT no es propia de alguna época del año, debido a que las tormentas registradas se distribuyen durante toda la época lluviosa del año, y que de igual manera, las duraciones de tormenta se encuentran en rangos de duraciones bajos y altos, es característica de las tormentas que poseen fuerte precipitación en la zona sur-Occidental y central de Quito.

La barrera occidental impide el movimiento en esta dirección, y desvía el movimiento en dirección Sur - Norte.

#### IV.1.5.b. DIRECCION PRINCIPAL DE TORMENTA N° 2

Esta tormenta principal es característica de fuertes precipitaciones en la zona central de Quito (Precipitación promedio = 16 mm), sus duraciones son en promedio bajas (308 min. = 5.1 h) y puede ser prácticamente la tormenta portadora de toda la influencia climática del área litoral.

En este desplazamiento, la tendencia al aumento de el cuartil y de probabilidad de excedencia se mantiene, pero esta tendencia es menor a la DPT anterior.

Las velocidades promedios se encuentran en el orden de 1.3 m/s, procesos acelerados de occidente a oriente y retardados de norte a sur son más característicos en este tipo de desplazamientos.

#### IV.1.5.c. DIRECCION PRINCIPAL DE TORMENTA N° 3

Tipo de movimiento de orden local muy parecido al DPT anterior, la diferencia radica en que la componente del desplazamiento en la zona central tiene dirección opuesta( Entre estación Quito-Observatorio e Iñaquito ), de esta manera, parte del movimiento se dirige de norte a sur, otra parte de sur a norte pero que en general el movimiento se dirige de occidente a oriente. Este tipo de desplazamiento puede ser considerado similar al anterior pero en el que existe mayor efecto de los vientos acusos que ingresan por la parte norte del volcán Ruco Pichincha. Así, el efecto es un desplazamiento de la cobertura de tormenta de aproximadamente unos 4 Km. en dirección sur.

Las precipitaciones máximas se obtienen en la parte central pero según lo dicho la estación Iñaquito posee poca precipitación promedio debido al desplazamiento de los 4 Km. La duración promedio ( 239 min.= 4 h.) indica características locales, esta en el orden de duraciones bajas, por lo que a esta tormenta se la puede considerar como consecuencia de los efectos convectivos propios de la Hoya de Quito y cierta influencia de la región litoral.

El cambio del cuartil es fuerte desde la zona de máxima intensidad hacia los alrededores, el movimiento se produce con velocidad de aproximadamente 1.5 m/s.

Movimientos acelerados y retardados se han observado indistintamente en todas las tormentas, así también se han observado procesos inversos que producen que una tormenta comience y termine en la misma estación de registro.

De las 38 tormentas estudiadas, 12 de ellas asemejan su

movimiento a esta DPT. que conjuntamente con las 7 tormentas de la DPT tipo 2, suman 19, esto indica el que el 50% de las tormentas registradas se asemejan a las DPT tipo 2 y 3 conjuntamente.

#### IV.1.5.d. DIRECCION PRINCIPAL DE TORMENTA N° 4

De todos las DPT encontradas, esta es la única cuya componentes en la dirección de avance es de oriente a occidente, se la puede considerar como tormenta de tipo local debido a su duración promedio baja (duración = 179 min = 3 h.) con cierta influencia del clima existente en la región oriental. Al parecer, las masas acuosas chocan con el frente occidental de la ciudad y cambian su movimiento hacia el norte con lo que producen fuertes precipitaciones en la parte central de la ciudad de Quito (Precipitación promedio en las estaciones consideradas = 13.1 mm). Esta DPT, posee velocidades de traslación de aproximadamente 1.5 m/s en su influencia norte y de 14 m/s en su influencia occidental,

Movimientos en su mayoría acelerados se han registrado en estos desplazamientos, caracterizados por sus rápidos movimientos de sur a norte.

Es interesante notar que en la estación Quito-Observatorio se han registrado tormentas de cuarto cuartil y 10 % de probabilidad con precipitaciones de 33 mm, este tipo de datos han cambiado la tendencia del aumento del cuartil y la probabilidad al centro de la tormenta. Debido a esto, esta DPT se caracteriza por la tendencia al cambio a mayores cuartiles y probabilidades en dirección al centro de la tormenta.



79°00'00"

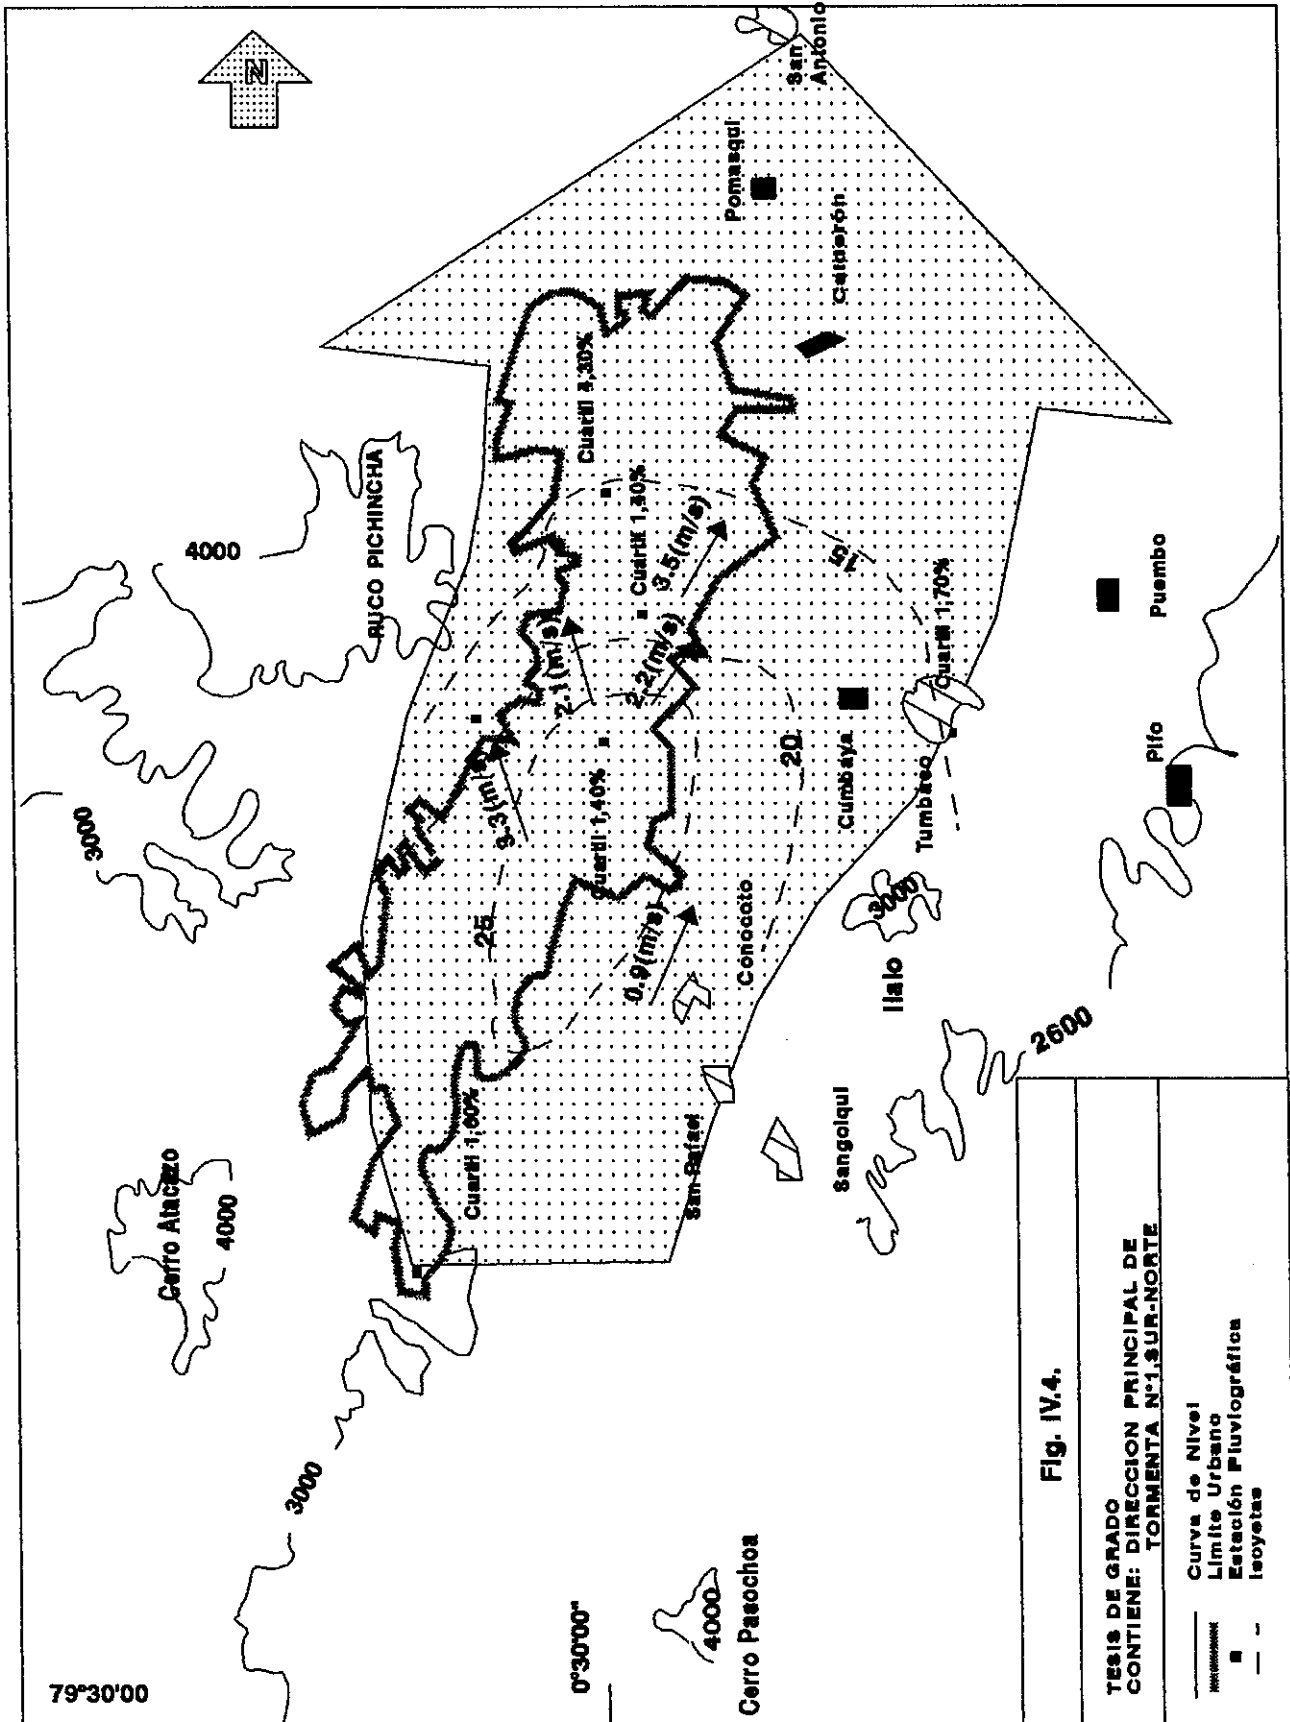

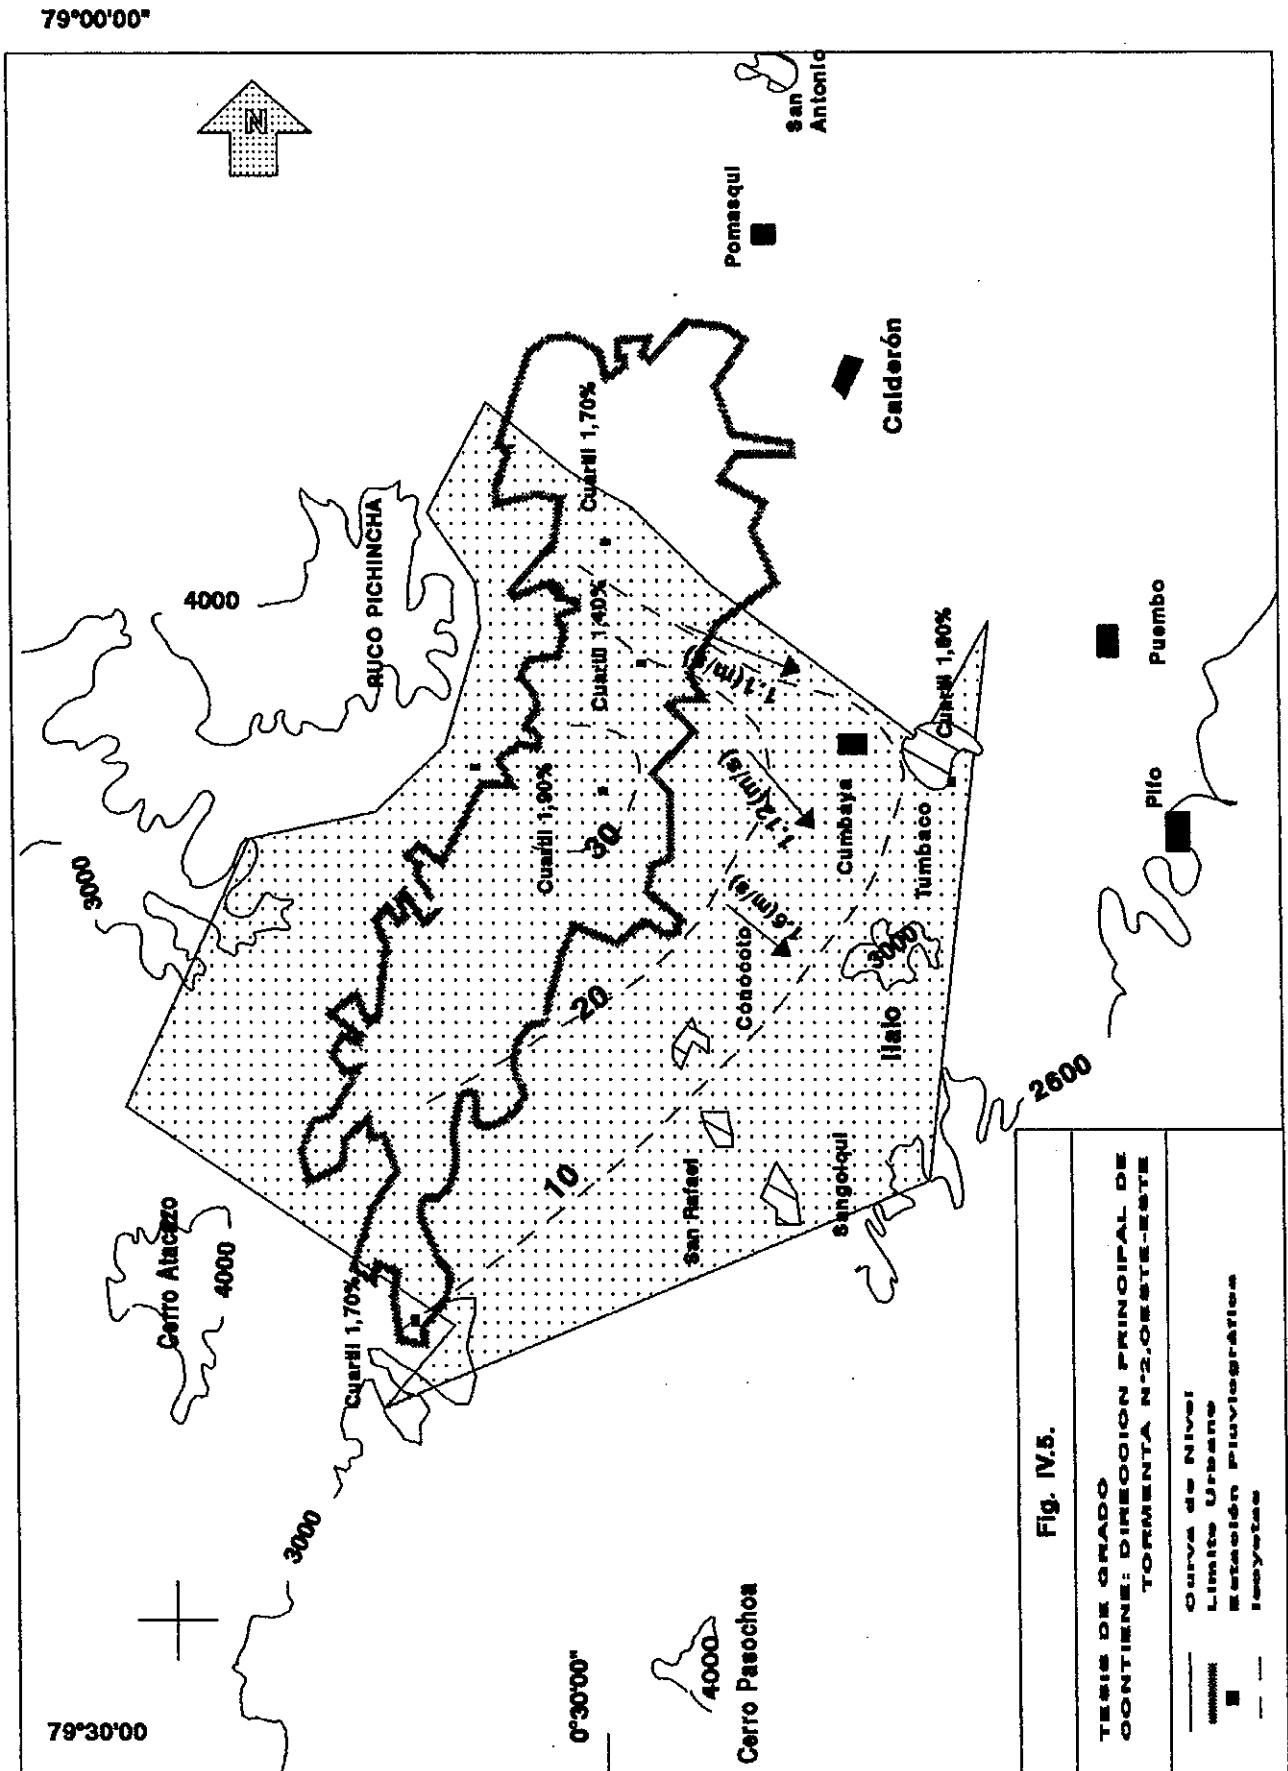

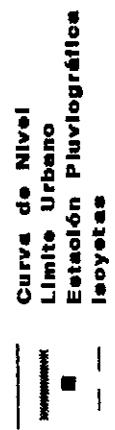

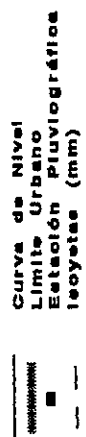

#### IV.2. REDUCCION DE LA INTENSIDAD DE LLUVIA DEL CENTRO DE LA TORMENTA HACIA LA PERIFERIE

El estudio de tormentas puntuales utilizando diferentes estaciones, ha permitido encontrar la disminución de la intensidad de lluvia en puntos que se alejan del centro de la tormenta. Así, en la consideración de una tormenta de diseño es necesario ingresar un factor reductor de la intensidad según el aumento del área de cobertura de tormenta.

Muchos estudios se han realizado en otros países, pero en nuestro país poco se ha realizado en este campo, lo cual es muy necesario con el fin de no sobre-estimar los caudales de crecida.

En este estudio, es necesario la mayor cantidad de estaciones registradoras, por esta razón las tormentas analizadas son solamente aquellas de las cuales se dispone los registros en todas las estaciones analizadas (6 estaciones). Cuatro tormentas son analizadas y de ellas en el Anexo N°5 se indican las máximas precipitaciones encontradas para diferentes duraciones en las estaciones seleccionadas y también el cálculo de las curvas precipitación promedio adimensional en función del área de cobertura de tormenta. El procedimiento utilizado es el siguiente:

- Elaboración de los mapas de isoyetas para diferentes duraciones (1/2 h., 1 h., 3 h., 6 h.) para cada tormenta seleccionadas.
- Determinación por medio de un planímetro las áreas con precipitación similar.
- Determinación de la precipitación media en cada área comprendida entre dos isoyetas.

- Adimensionalizar la precipitación, dividiendo la altura de precipitación promedio en cada área para la altura de precipitación máxima obtenida en la tormenta.
- Realizar los gráficos de la precipitación adimensional en función del área correspondiente.

Los resultados obtenidos se indican en la Fig. IV.8.a, IV.8.b., IV.8.c. y IV.8.d., estas curvas tienen un límite máximo de aplicación, están consideradas aceptables hasta cuando el área de aporte del sector en análisis no excede los 110 Km<sup>2</sup>. Como se observa las curvas obtenidas para duraciones de 1/2 h., 2 h., 3 h., y 6 h., son muy parecidas como para considerarlas diferentes, por ello, se ha obtenido la curva promedio y a la vez se han comparado con las curvas obtenidas en (Fig. IV.9.); el estudio realizado en 1985 correspondiente a la referencia 13 y la utilizada actualmente por el U.S. Weather Bureau Tech.<sup>4</sup> para 1 hora de duración. Prácticamente las tres curvas son iguales, aunque con relación a la curva del US. Weather Bureau (duración igual a 1 h.) difiere en el concepto teórico. Esto demuestra que la región en estudio tiene curvas características y, hasta 110 Km<sup>2</sup> de área de aporte las curvas son prácticamente iguales para duraciones menores a 6 horas.

**AREA - % DE ALTURA DE PRECIPITACION  
TORMENTA : 1982-12-07**

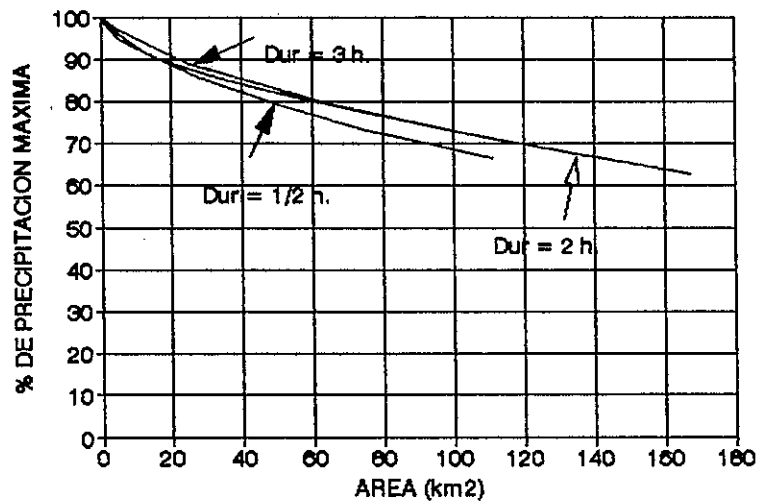

**Fig. IV.8.a.**

**AREA - % DE ALTURA DE PRECIPITACION  
TORMENTA : 1982 - 11 - 19**

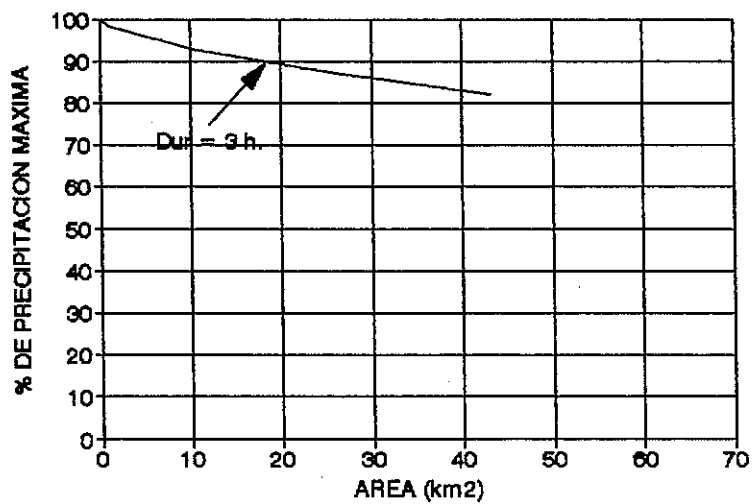

**Fig. IV.8.b.**

AREA - % DE ALTURA DE PRECIPITACION  
TORMENTA : 1982 - 10 - 04

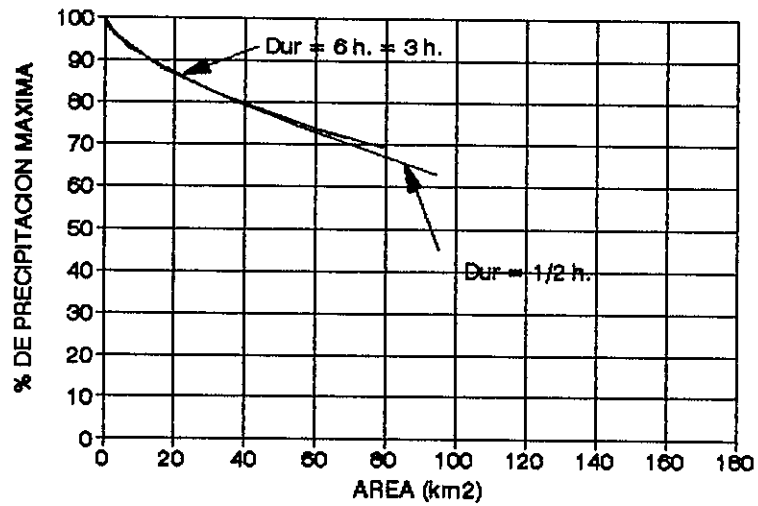

Fig. IV.8.c.

AREA - % DE ALTURA DE PRECIPITACION  
TORMENTA : 1982 - 09 - 19

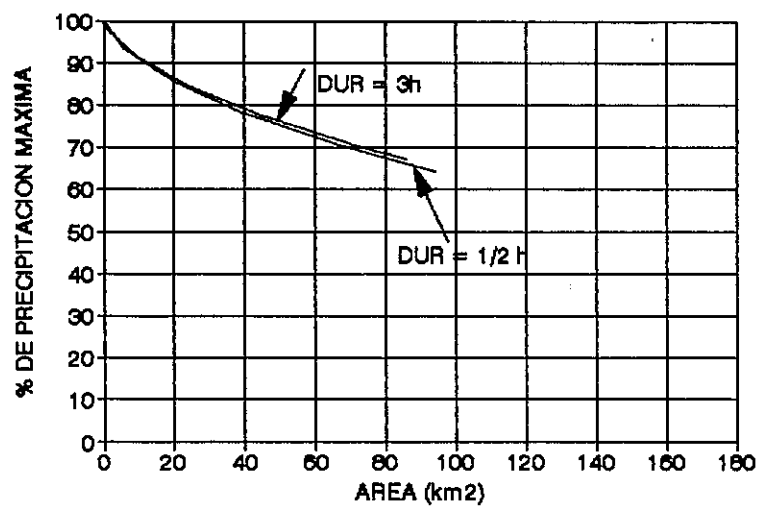

Fig. IV.8.d.



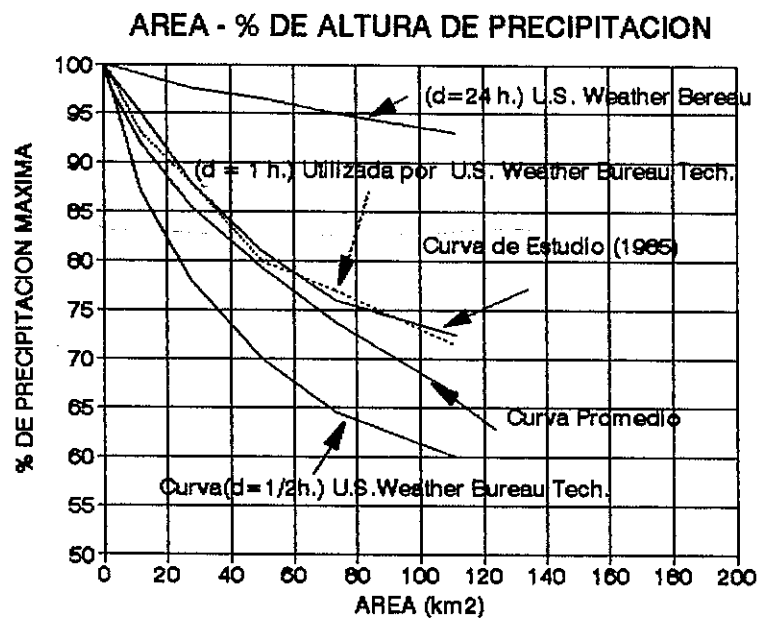

Fig. IV.9.

#### IV.3. VARIACION DE LA INTENSIDAD DE LLUVIA CRITICAS EN RELACION CON EL AVANCE DE LA FRONTERA URBANA.

Una vez que las masas de aire húmedas se han dislocado hacia zonas de interés, cuatro son los mecanismos necesarios para la formación de una tormenta<sup>9</sup>:

- Un mecanismo que produzca enfriamiento del aire
- Un mecanismo que sea capaz de producir condensación
- Un mecanismo que produzca crecimiento de las gotas de nube.
- Un mecanismo que produzca acumulación de humedad para explicar las intensidades de lluvia observados.

El mecanismo que produce el enfriamiento del aire ha sido tratado extensamente en el inicio de este capítulo.

La condensación en la atmósfera se da en partículas pequeñas de sustancias que tienen afinidad por el agua, aún cuando el aire no este saturado, a éstas partículas se las denominados núcleos higroscópicos o núcleos de condensación. Ejemplos de éstas sustancias son: Clorito de Sodio y Trióxido de sulfuro. El origen del núcleo es generalmente terrestre, el polvo o desechos de procesos de combustión en capas cercanas a la superficie, pueden actuar también como núcleos.

Agentes químicos como el hielo seco, yoduro de plata y otros, han sido utilizados como núcleos de condensación para producir lluvia artificial, en ciertos casos, se han registrado aumentos entre 10 % y 15 % de la cantidad promedio de precipitación.<sup>9</sup>

El mecanismo que produce el crecimiento de las gotas actualmente está considerado como resultado de dos fenómenos:

- Coexistencia de cristales de hielo y gotas de agua.
- Coalescencia o colisión.

A temperaturas bajo los  $-40^{\circ}\text{C}$  aproximadamente, se ha encontrado que cristales de hielo y gotas de agua coexisten, bajo estas condiciones, ciertas partículas de arcillas; minerales y orgánicas, actúan como núcleos de congelamiento y de esta forma los cristales de hielo se desarrollan. La diferencia en la presión de vapor; mayor sobre el agua y menor sobre el hielo, explica la evaporación de gotas de agua y la posterior condensación de mucha de esta agua sobre los cristales de hielo. En los inicios del crecimiento de las gotas, el efecto de los cristales de hielo puede ser más importante, y posteriormente el efecto de colisión. La velocidad de caída de las gotas de agua dependen del tamaño de ellas, debido a esto, las mayores intensidades de lluvia han sido registradas cuando los diámetros de las gotas de agua son mayores.

El pluviógrafo, en este caso, mediría primeramente; un mayor ingreso de volumen de agua por gota, y segundo un mayor ingreso de gotas por tiempo.

Las intensidades de lluvias observadas, deben necesariamente ser explicadas en función de un mecanismo de acumulación de humedad. este mecanismo puede consistir en la geometría característica de las nubes de tormenta, las cuales alcanzan grandes alturas. El fenómeno denominado convergencia, que produce la forma típica de yunque (angosto en las capas bajas y ancha en

las capas más altas), indican una fuerte acumulación de humedad en su forma y durante el proceso de formación de la tormenta.

Los datos obtenidos se indican en el anexo N° 2, y representan las intensidades máximas anuales en diferentes intervalos de tiempo (5 min, 10 min, 15 min, 1/2 h., 1 h., 2 h., 3 h., 6 h., 12 h., y 24 h.) para la estación Quito-Observatorio (Fig. IV.10.a, y Fig. IV.10.b). Con el fin de detectar alguna tendencia específica, se ha realizado un ajuste lineal a los datos (Fig. IV.11.), los resultados se indican en las Fig. IV.12.

Para tener una buena apreciación del incremento del área urbanizada (crecimiento semilogarítmico) y del aumento de las intensidades (Tomado como Ejemplo 30 min, por encontrarse la máxima tendencia al aumento en esta duración), en la Fig. IV.13 se indica los cambios desde el año 1946.<sup>2</sup>

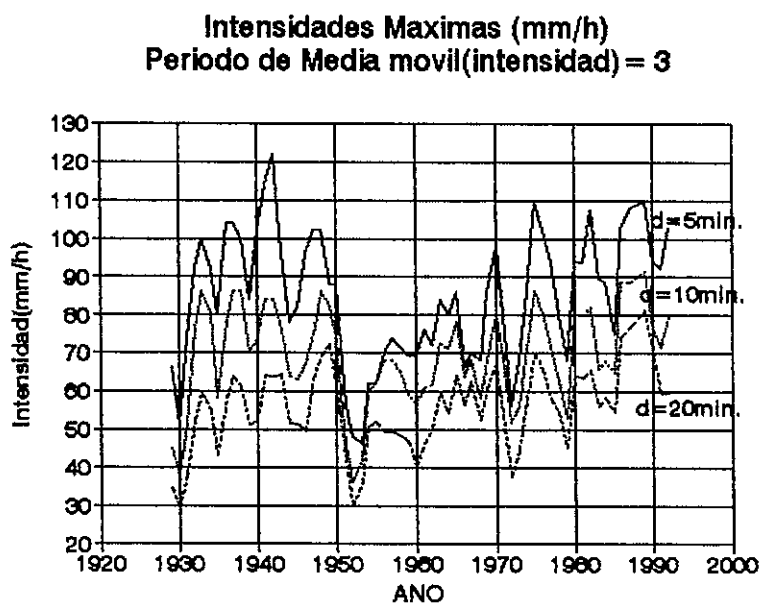

Fig.IV.10.a.

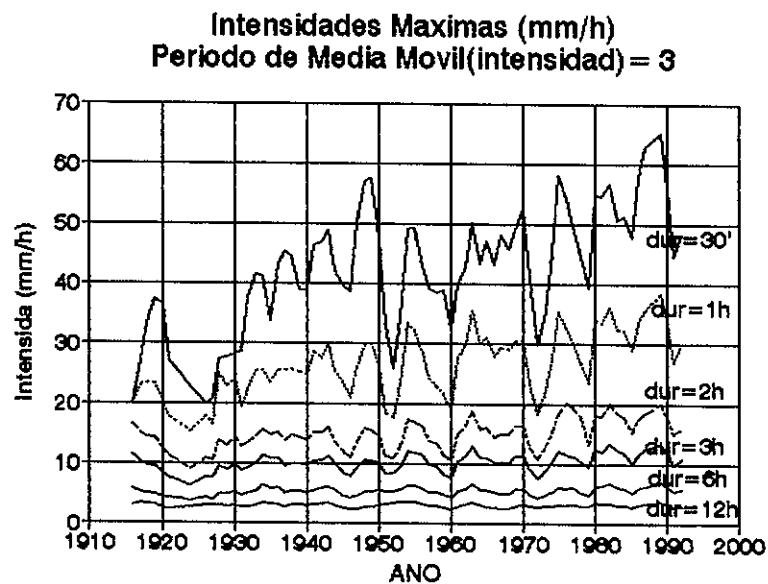

Fig.IV.10.b.

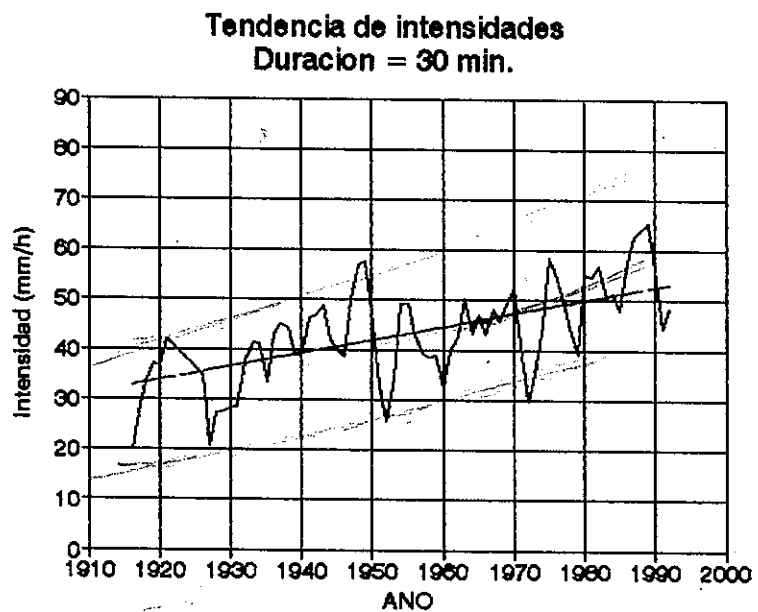

Fig.IV.11.

### Tendencia de Intensidades Maximas Ajuste Lineal

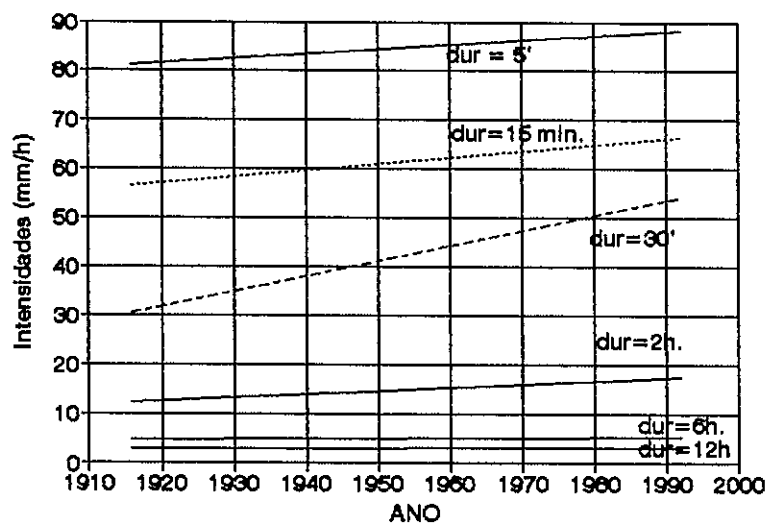

Fig. IV.12.

### Tendencia de intensidad maxima d=30 min y la tendencia del crecimiento areal

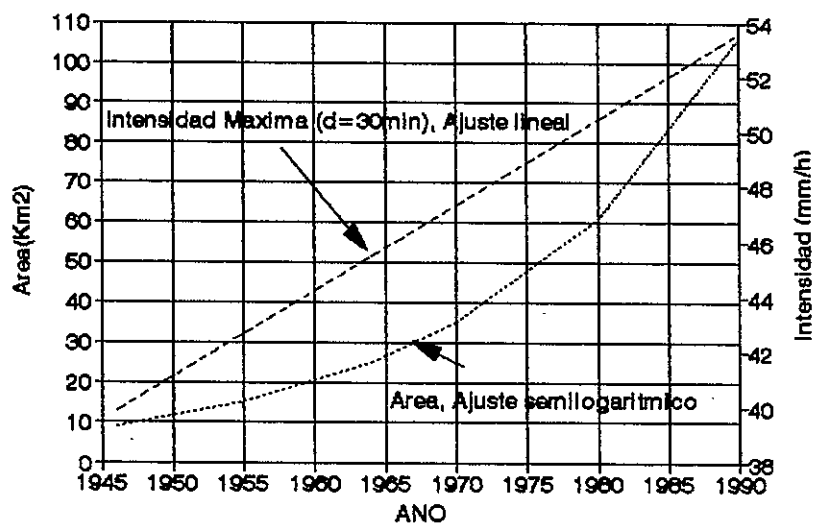

Fig. IV.13.

Diferentes hipótesis se pueden pensar para explicar las tendencias al aumento de intensidades máximas anuales en diferentes intervalos de tiempo.

El crecimiento de las edificaciones puede asemejar efectos de incremento de macrorugosidad en el movimiento de las masas de aire, de esta manera, las masas de aire cargadas de humedad, pueden encontrar resistencia, y a su vez, por turbulencia, producir mezclas que den como resultado fuertes intensidades de tormenta. Este estudio, conjuntamente con el análisis del aumento de los desechos industriales, producto de la combustión de sustancias que contienen ácidos sulfurosos y nitrosos (constituyen los núcleos más activos<sup>4</sup>), deben ser analizados.

## V. CONCLUSIONES Y RECOMENDACIONES

### V.1. CONCLUSIONES

1. Este trabajo debe entenderse como un primer intento en el país de establecer patrones de tormenta propios, bajo un análisis sustentado estadístico - probabilístico.
2. Si bien el tema se ha desarrollado para Quito y sus alrededores (Hoya de Quito), sin embargo la metodología utilizada puede ser aplicada a otras regiones del país, y con esa información se debe proceder a una generalización.
3. El gran volumen de datos utilizado (289 tormentas, distribuidas en 73 años), es una referencia para apreciar el trabajo en sí mismo, y permite valorar los resultados con la suficiente confiabilidad.
4. El considerar las abstracciones iniciales (pérdidas) como una variable ha permitido conocer el cambio en el patrón de tormentas producido, con el desplazamiento del grafo en el tiempo. Esto permite una mayor seguridad en la aplicación de la tormenta de diseño en dependencia del tipo de superficie de drenaje del área de interés.
5. También se ha caracterizado a los patrones de tormenta en dependencia de la duración de la lluvia; así, de acuerdo con el tipo de duración varía el número de curva adoptado.
6. Se ha logrado deducir para la Hoya de Quito curvas que toman



en cuenta la reducción de la intensidad de lluvia con el aumento del área bañada, y en dependencia también de la duración de la tormenta. La validez de las curvas encontradas es en el rango de áreas de drenaje de hasta 110 Km<sup>2</sup>.

7. Adicionalmente se ha podido demostrar la presencia de 4 direcciones principales en el avance de las direcciones de tormentas, que en cierta forma reflejan la influencia de las características locales y regionales en el fenómeno.

8. Las velocidades de avance de las tormentas en la zona de estudio son del orden de 1 - 3 m/s.

9. La relación encontrada entre la intensidad de lluvia y la duración, grafo que es de tipo logarítmico, permite apreciar también la importancia que tiene el período de retorno, como tercera variable en el análisis, que justifica plenamente la dispersión de puntos observado.

10. Se ha podido demostrar la incidencia del avance de la tormenta urbana en el aumento de la intensidad de lluvia, que puede ser explicada por el efecto del aumento de la turbulencia como consecuencia del aumento de la rugosidad de la superficie, como también por el aumento de material sólido aglutinante (cristales).

## V.2. RECOMENDACIONES

1. Se recomienda introducir en la determinación de hidrogramas de crecidas los patrones de tormenta deducidos en este trabajo.
2. Adicionalmente es importante ampliar el ámbito del trabajo a todo el país. Para ello, obviamente se deberá contar con la participación del Instituto Nacional de Meteorología e Hidrología y de otras instituciones relacionadas en la temática.
3. Tratar de centrar los datos hidrológicos registrados en el país por cualquier entidad en el Instituto Nacional de Meteorología e Hidrología, y concebir mejores formas de acceder por parte de los interesados a los mismos.
4. A la comunidad ingenieril, y por su intermedio a la empresa pública y privada, para que solidaricen la información y permitan avanzar en diferentes estudios, para que financien proyectos de investigación, para que el celo profesional no se convierta en el frío hecho de creerse indispensables o mantener el liderazgo.

## BIBLIOGRAFIA

1. Andrade Chávez L., NOTAS DEL SEMINARIO DE SISTEMAS DE DRENAJE URBANO POR COMPUTADORA, E.P.N., Quito, Ecuador(1993).
2. Almeida Aguilar R., ANALISIS DEL CLIMA DE LA CIUDAD DE QUITO EN BASE AL ESTUDIO ESTADISTICO DE LOS DATOS METEOROLOGICOS EXISTENTES EN EL OBSERVATORIO ASTRONOMICO HASTA 1989, Universidad Central del Ecuador, Tesis, Quito, Ecuador(1991).
3. Román Crespo L., Santacruz Ramos E., MODELACION DEL FENOMENO PRECIPITACION ESCURRIMIENTO EN CUENCAS HIDROGRAFICAS, E.P.N., Tesis, Quito (1989).
4. Visman W., Knapp J. Lewis G. Harbaugh T., INTRODUCTION TO HIDROLOGY, 2<sup>DA</sup> Edición, Ed. Harper & Row, New York, UU.SS.(1977).
5. URBIS, PROGRAMA DE HIDROLOGIA URBANA, Manual del usuario, Instituto de Hidráulica Politécnica de Milán., Apéndice 1.
6. Coyne et Bellier.,ESTUDIO DE SOLUCIONES DESTINADAS A ELIMINAR LOS DANOS Y PERJUICIOS CAUSADOS POR LAS AGUAS PLUVIALES EN EL SECTOR OCCIDENTAL DE LA CIUDAD DE QUITO, Ministerio de Salud Publica I.E.O.S.,Quito, Ecuador(1987).
7. Salas J. Benzedén E., HYDROLOGY AND WATER RESOURCES PROGRAM, Colorado State University., EE.UU.(1977).
8. Andrade L. Villacís O., ANALISIS DE FRECUENCIAS DE CAUDALES MAXIMOS , Instructivo N°8. EPN., Quito, Ecuador(1986).
9. Ven te Chow, HANDBOOK OF APPLIED HYDROLOGY, Ed. Mc.Graw-Hill, New York, EE.UU.(1964).

10. Louis J. Battan, LA NATURALEZA DE LAS TORMENTAS, Ed. Universitaria de Buenos Aires, Argentina(1964).
11. Diskin M.H., ON THE DETERMINATION OF THE SPEED OF MOVING RAINFALL PATTERNS, Technion City, Israel(1987).
12. Peña M.G., LLUVIAS Y SEQUIAS EN EL ECUADOR ,Ministerio de Agricultura y Ganadería, Quito, Ecuador(1965).
13. Murray R.S., ESTADISTICA , Colección Schaum, 2<sup>da</sup> Edición,Ed. Mc.Graw Hill, España, 1991
14. Montero Abarca J. A., ESTUDIOS PRELIMINARES PARA UN SISTEMA DE MACRODRENAJE PARA LA CIUDAD DE QUITO, Tesis de Grado, E.P.N., Quito, Ecuador(1985).
15. Henderson R.D., EXTREME STORM RAINFALLS IN THE SOUTHER ALPS, NEW ZEALAND, International Association of hydrological Sciences (IAHS), Publicación N°213, Yocohama Symposium, 1993.
16. ANALISIS DE LAS CONDICIONES SINOPTICAS DEL AREA ECUATORIANA, INAMHI.,Quito, Ecuador(1991).
17. Bonifaz E., ESTUDIO DE LAS LLUVIAS EN LA SIERRA ECUATORIANA, Paper., Simposio "Modernas Orientaciones sobre problemas de planificación de los recursos Hídricos"., Ed. EPN., Quito., Ecuador(1983).

## REFERENCIAS BIBLIOGRAFICAS

1. Andrade Chávez L., NOTAS DEL SEMINARIO DE SISTEMAS DE DRENAJE URBANO POR COMPUTADORA, Página 2, E.P.N., Quito, Ecuador(1993).
2. Almeida Aguilar R., ANALISIS DEL CLIMA DE LA CIUDAD DE QUITO EN BASE AL ESTUDIO ESTADISTICO DE LOS DATOS METEOROLOGICOS EXISTENTES EN EL OBSERVATORIO ASTRONOMICO HASTA 1989, Universidad Central del Ecuador, Tesis, Páginas 22-37, Quito, Ecuador(1991).
3. Román Crespo L., Santacruz Ramos E., MODELACION DEL FENOMENO PRECIPITACION ESCURRIMIENTO EN CUENCAS HIDROGRAFICAS, Página 18, E.P.N., Tesis, Quito (1989).
4. Visman W., Knapp J. Lewis G. Harbaugh T., INTRODUCTION TO HIDROLOGY, 2<sup>DA</sup> Edición, Páginas 22, 23, 459, 592-604, Ed. Harper & Row, New York, UU.SS.(1977).
5. URBIS, PROGRAMA DE HIDROLOGIA URBANA, Manual del usuario, Instituto de Hidráulica Politécnica de Milán., Apéndice 1., Páginas 22-23,
6. Coyne et Bellier.,ESTUDIO DE SOLUCIONES DESTINADAS A ELIMINAR LOS DAÑOS Y PERJUICIOS CAUSADOS POR LAS AGUAS PLUVIALES EN EL SECTOR OCCIDENTAL DE LA CIUDAD DE QUITO. Páginas 36-43, 55, Ministerio de Salud Publica I.E.O.S.,Quito, Ecuador(1987).
7. Salas J. Benzedén E., HYDROLOGY AND WATER RESOURCES PROGRAM, Colorado State University.,Páginas 1-30, EE-UU.(1977).

8. Andrade L., Villacís O., ANÁLISIS DE FRECUENCIAS DE CAUDALES MÁXIMOS , Instructivo N°8., Página 17-20, EPN., Quito, Ecuador(1986).
9. Ven te Chow, HANDBOOK OF APPLIED HYDROLOGY, Ed. Mc.Graw-Hill, Página 8-16, 8-17, New York, EE.UU.(1964).
10. Louis J. Battan, LA NATURALEZA DE LAS TORMENTAS, Ed. Universitaria de Buenos Aires, Página 19-72, Argentina (1964).
11. Diskin M.H., ON THE DETERMINATION OF THE SPEED OF MOVING RAINFALL PATTERNS, Technion City, Página 1-7, Israel(1987).
12. Peña M.G., LLUVIAS Y SEQUIAS EN EL ECUADOR ,Ministerio de Agricultura y Ganadería, Página 34-35, Quito, Ecuador(1965).
13. Montero Abarca J. A., ESTUDIOS PRELIMINARES PARA UN SISTEMA DE MACRODRENAJE PARA LA CIUDAD DE QUITO, Tesis de Grado, E.P.N., Página 47-51, Quito, Ecuador(1985).

**A N E X O      N° 1**

[illegible]



DATOS PRINCIPALES PARA IDENTIFICACION DE TORMENTA  
ESTACION: QUITO - OBSERVATORIO

2

| AÑO  | MES | DIA | HI     | HF     | DUR    | h1   | p1   | h2   | p2   | h3   | p3   | h4   | p4   | h5   | p5   | h6   | p6   | h7   | p7   | h8   | p8   | h9   | p9   | h10  | p10  | h11  | p11  | h12  | p12  | h13  | p13  |
|------|-----|-----|--------|--------|--------|------|------|------|------|------|------|------|------|------|------|------|------|------|------|------|------|------|------|------|------|------|------|------|------|------|------|
|      |     |     | (h.)   | (h.)   | (min)  | (h.) | (mm) | (h.) | (mm) | (h.) | (mm) | (h.) | (mm) | (h.) | (mm) | (h.) | (mm) | (h.) | (mm) | (h.) | (mm) | (h.) | (mm) | (h.) | (mm) | (h.) | (mm) | (h.) | (mm) | (h.) | (mm) |
| 1983 | 11  | 7   | 123.83 | 130.00 | 370.0  | 23.8 | 0.0  | 24.5 | 6.5  | 25.6 | 8.1  | 26.9 | 8.5  | 27.2 | 15.8 | 28.4 | 19.0 | 28.9 | 32.0 | 29.4 | 36.2 | 30.0 | 37.9 |      |      |      |      |      |      |      |      |
| 1983 | 8   | 130 | 114.25 | 115.83 | 95.0   | 14.3 | 0.0  | 14.6 | 6.0  | 15.4 | 40.0 | 15.8 | 41.3 |      |      |      |      |      |      |      |      |      |      |      |      |      |      |      |      |      |      |
| 1983 | 5   | 124 | 115.25 | 116.83 | 95.0   | 15.3 | 0.0  | 15.6 | 7.0  | 16.3 | 32.2 | 16.8 | 35.4 |      |      |      |      |      |      |      |      |      |      |      |      |      |      |      |      |      |      |
| 1983 | 3   | 114 | 115.58 | 118.33 | 210.0  | 15.6 | 0.0  | 15.8 | 5.7  | 16.2 | 37.8 | 16.3 | 38.2 | 18.3 | 41.1 |      |      |      |      |      |      |      |      |      |      |      |      |      |      |      |      |
| 1982 | 12  | 7   | 113.83 | 117.00 | 190.0  | 13.8 | 0.0  | 13.9 | 1.0  | 14.3 | 17.0 | 14.9 | 29.0 | 17.0 | 30.7 |      |      |      |      |      |      |      |      |      |      |      |      |      |      |      |      |
| 1982 | 11  | 119 | 113.42 | 115.50 | 125.0  | 13.4 | 0.0  | 13.8 | 14.2 | 14.3 | 14.9 | 14.5 | 20.4 | 14.8 | 21.7 | 15.5 | 22.8 |      |      |      |      |      |      |      |      |      |      |      |      |      |      |
| 1982 | 10  | 4   | 114.50 | 116.87 | 142.0  | 14.5 | 0.0  | 14.7 | 5.0  | 15.1 | 27.5 | 16.9 | 34.1 |      |      |      |      |      |      |      |      |      |      |      |      |      |      |      |      |      |      |
| 1982 | 9   | 119 | 115.67 | 117.50 | 110.0  | 15.7 | 0.0  | 15.8 | 11.2 | 17.0 | 36.1 | 17.5 | 37.5 |      |      |      |      |      |      |      |      |      |      |      |      |      |      |      |      |      |      |
| 1981 | 12  | 129 | 120.33 | 131.17 | 410.0  | 20.3 | 0.0  | 23.5 | 4.7  | 24.0 | 8.0  | 24.7 | 10.0 | 26.0 | 14.6 | 27.0 | 21.3 | 28.0 | 25.3 | 29.5 | 26.3 | 31.2 | 32.0 |      |      |      |      |      |      |      |      |
| 1981 | 8   | 123 | 115.42 | 117.50 | 125.0  | 15.4 | 0.0  | 16.1 | 2.0  | 16.3 | 6.5  | 16.4 | 12.6 | 16.8 | 25.5 | 17.2 | 31.1 | 17.5 | 31.7 |      |      |      |      |      |      |      |      |      |      |      |      |
| 1981 | 3   | 121 | 116.08 | 130.17 | 800.0  | 16.1 | 0.0  | 17.2 | 3.0  | 17.5 | 8.5  | 17.8 | 10.1 | 21.7 | 18.3 | 26.0 | 24.8 | 30.2 | 26.7 |      |      |      |      |      |      |      |      |      |      |      |      |
| 1980 | 12  | 126 | 113.33 | 116.00 | 160.0  | 13.3 | 0.0  | 13.5 | 0.5  | 14.1 | 50.0 | 16.0 | 51.6 |      |      |      |      |      |      |      |      |      |      |      |      |      |      |      |      |      |      |
| 1980 | 11  | 128 | 114.75 | 116.50 | 105.0  | 14.8 | 0.0  | 15.3 | 27.9 | 15.7 | 33.9 | 16.5 | 36.4 |      |      |      |      |      |      |      |      |      |      |      |      |      |      |      |      |      |      |
| 1980 | 10  | 120 | 114.75 | 118.00 | 195.0  | 14.8 | 0.0  | 15.5 | 25.5 | 16.0 | 30.2 | 17.6 | 30.7 | 18.0 | 32.1 |      |      |      |      |      |      |      |      |      |      |      |      |      |      |      |      |
| 1980 | 10  | 5   | 114.50 | 129.17 | 880.0  | 14.5 | 0.0  | 15.4 | 10.0 | 18.0 | 15.0 | 19.0 | 19.0 | 20.5 | 23.0 | 22.7 | 30.2 | 29.2 | 31.5 |      |      |      |      |      |      |      |      |      |      |      |      |
| 1979 | 11  | 111 | 112.42 | 122.00 | 575.0  | 12.4 | 0.0  | 12.8 | 6.5  | 15.0 | 6.5  | 15.4 | 26.8 | 15.8 | 28.8 | 18.7 | 29.3 | 19.3 | 36.4 | 20.0 | 38.3 | 22.0 | 39.2 |      |      |      |      |      |      |      |      |
| 1979 | 5   | 128 | 115.00 | 123.00 | 480.0  | 15.0 | 0.0  | 18.8 | 8.2  | 20.8 | 9.4  | 23.0 | 30.7 |      |      |      |      |      |      |      |      |      |      |      |      |      |      |      |      |      |      |
| 1979 | 5   | 113 | 116.17 | 119.75 | 215.0  | 16.2 | 0.0  | 18.7 | 4.0  | 19.3 | 10.2 | 19.8 | 28.2 |      |      |      |      |      |      |      |      |      |      |      |      |      |      |      |      |      |      |
| 1979 | 4   | 126 | 113.00 | 129.58 | 515.0  | 13.0 | 0.0  | 14.4 | 1.1  | 16.0 | 9.2  | 17.8 | 11.2 | 28.5 | 31.3 | 29.6 | 37.8 |      |      |      |      |      |      |      |      |      |      |      |      |      |      |
| 1979 | 9   | 8   | 115.00 | 120.50 | 330.0  | 15.0 | 0.0  | 15.3 | 1.2  | 17.8 | 1.3  | 18.1 | 18.0 | 19.0 | 30.0 | 20.5 | 35.8 |      |      |      |      |      |      |      |      |      |      |      |      |      |      |
| 1979 | 3   | 1   | 113.67 | 124.00 | 625.0  | 13.7 | 0.0  | 17.3 | 3.4  | 18.8 | 10.0 | 19.8 | 10.5 | 20.5 | 16.2 | 22.1 | 20.0 | 24.1 | 25.1 |      |      |      |      |      |      |      |      |      |      |      |      |
| 1979 | 2   | 128 | 123.00 | 129.58 | 395.0  | 23.0 | 0.0  | 23.7 | 10.0 | 26.5 | 26.0 | 29.0 | 26.0 | 29.6 | 27.1 |      |      |      |      |      |      |      |      |      |      |      |      |      |      |      |      |
| 1979 | 2   | 7   | 115.03 | 118.67 | 218.0  | 15.0 | 0.0  | 15.2 | 6.5  | 15.7 | 10.0 | 17.3 | 16.0 | 17.5 | 20.0 | 18.3 | 24.0 | 18.7 | 26.1 |      |      |      |      |      |      |      |      |      |      |      |      |
| 1977 | 10  | 7   | 113.83 | 118.75 | 295.0  | 13.8 | 0.0  | 14.0 | 8.0  | 14.8 | 10.0 | 15.3 | 16.5 | 16.3 | 20.0 | 18.0 | 29.3 | 18.8 | 30.5 |      |      |      |      |      |      |      |      |      |      |      |      |
| 1977 | 5   | 4   | 113.17 | 116.42 | 195.0  | 13.2 | 0.0  | 13.8 | 18.3 | 16.4 | 25.0 |      |      |      |      |      |      |      |      |      |      |      |      |      |      |      |      |      |      |      |      |
| 1977 | 3   | 128 | 112.25 | 131.00 | 1125.0 | 12.3 | 0.0  | 12.5 | 7.5  | 13.2 | 10.0 | 18.3 | 20.0 | 20.5 | 21.0 | 31.0 | 46.4 |      |      |      |      |      |      |      |      |      |      |      |      |      |      |
| 1977 | 3   | 121 | 115.67 | 127.33 | 740.0  | 15.7 | 0.0  | 16.5 | 7.7  | 24.5 | 7.7  | 25.0 | 17.5 | 27.3 | 24.5 |      |      |      |      |      |      |      |      |      |      |      |      |      |      |      |      |
| 1976 | 12  | 119 | 114.83 | 118.83 | 240.0  | 14.8 | 0.0  | 15.2 | 3.0  | 15.5 | 8.0  | 15.9 | 17.0 | 16.2 | 23.0 | 17.0 | 25.0 | 18.8 | 27.0 |      |      |      |      |      |      |      |      |      |      |      |      |

\* RICHARD CIELO

## 3

[illegible]



[illegible]

②

|  | i | j | k | l | m | n | o | p | q | r | s | t | u | v | w | x | y | z | {aa} | {ab} | {ac} | {ad} | {ae} | {af} | {ag} | {ah} | {ai} | {aj} | {ak} | {al} | {am} | {an} | {ao} | {ap} | {aq} | {ar} | {as} | {at} | {au} | {av} | {aw} | {ax} | {ay} | {az} | {ba} | {bb} | {bc} | {bd} | {be} | {bf} | {bg} | {bh} | {bi} | {bj} | {bk} | {bl} | {bm} | {bn} | {bo} | {bp} | {bq} | {br} | {bs} | {bt} | {bu} | {bv} | {bw} | {bx} | {by} | {bz} | {ca} | {cb} | {cc} | {cd} | {ce} | {cf} | {cg} | {ch} | {ci} | {cj} | {ck} | {cl} | {cm} | {cn} | {co} | {cp} | {cq} | {cr} | {cs} | {ct} | {cu} | {cv} | {cw} | {cx} | {cy} | {cz} | {da} | {db} | {dc} | {dd} | {de} | {df} | {dg} | {dh} | {di} | {dj} | {dk} | {dl} | {dm} | {dn} | {do} | {dp} | {dq} | {dr} | {ds} | {dt} | {du} | {dv} | {dw} | {dx} | {dy} | {dz} | {ea} | {eb} | {ec} | {ed} | {ee} | {ef} | {eg} | {eh} | {ei} | {ej} | {ek} | {el} | {em} | {en} | {eo} | {ep} | {eq} | {er} | {es} | {et} | {eu} | {ev} | {ew} | {ex} | {ey} | {ez} | {fa} | {fb} | {fc} | {fd} | {fe} | {ff} | {fg} | {fh} | {fi} | {fj} | {fk} | {fl} | {fm} | {fn} | {fo} | {fp} | {fq} | {fr} | {fs} | {ft} | {fu} | {fv} | {fw} | {fx} | {fy} | {fz} | {ga} | {gb} | {gc} | {gd} | {ge} | {gf} | {gg} | {gh} | {gi} | {gj} | {gk} | {gl} | {gm} | {gn} | {go} | {gp} | {gq} | {gr} | {gs} | {gt} | {gu} | {gv} | {gw} | {gx} | {gy} | {gz} | {ha} | {hb} | {hc} | {hd} | {he} | {hf} | {hg} | {hh} | {hi} | {hj} | {hk} | {hl} | {hm} | {hn} | {ho} | {hp} | {hq} | {hr} | {hs} | {ht} | {hu} | {hv} | {hw} | {hx} | {hy} | {hz} | {ia} | {ib} | {ic} | {id} | {ie} | {if} | {ig} | {ih} | {ii} | {ij} | {ik} | {il} | {im} | {in} | {io} | {ip} | {iq} | {ir} | {is} | {it} | {iu} | {iv} | {iw} | {ix} | {iy} | {iz} | {ja} | {jb} | {jc} | {jd} | {je} | {jf} | {jg} | {jh} | {ji} | {jj} | {jk} | {jl} | {jm} | {jn} | {jo} | {jp} | {jq} | {jr} | {js} | {jt} | {ju} | {jv} | {jw} | {jx} | {jy} | {jz} | {ka} | {kb} | {kc} | {kd} | {ke} | {kf} | {kg} | {kh} | {ki} | {kj} | {kk} | {kl} | {km} | {kn} | {ko} | {kp} | {kq} | {kr} | {ks} | {kt} | {ku} | {kv} | {kw} | {kx} | {ky} | {kz} | {la} | {lb} | {lc} | {ld} | {le} | {lf} | {lg} | {lh} | {li} | {lj} | {lk} | {ll} | {lm} | {ln} | {lo} | {lp} | {lq} | {lr} | {ls} | {lt} | {lu} | {lv} | {lw} | {lx} | {ly} | {lz} | {ma} | {mb} | {mc} | {md} | {me} | {mf} | {mg} | {mh} | {mi} | {mj} | {mk} | {ml} | {mn} | {mo} | {mp} | {mq} | {mr} | {ms} | {mt} | {mu} | {mv} | {mw} | {mx} | {my} | {mz} | {na} | {nb} | {nc} | {nd} | {ne} | {nf} | {ng} | {nh} | {ni} | {nj} | {nk} | {nl} | {nm} | {nn} | {no} | {np} | {nq} | {nr} | {ns} | {nt} | {nu} | {nv} | {nw} | {nx} | {ny} | {nz} | {oa} | {ob} | {oc} | {od} | {oe} | {of} | {og} | {oh} | {oi} | {oj} | {ok} | {ol} | {om} | {on} | {oo} | {op} | {oq} | {or} | {os} | {ot} | {ou} | {ov} | {ow} | {ox} | {oy} | {oz} | {pa} | {pb} | {pc} | {pd} | {pe} | {pf} | {pg} | {ph} | {pi} | {pj} | {pk} | {pl} | {pm} | {pn} | {po} | {pp} | {pq} | {pr} | {ps} | {pt} | {pu} | {pv} | {pw} | {px} | {py} | {pz} | {qa} | {qb} | {qc} | {qd} | {qe} | {qf} | {qg} | {qh} | {qi} | {qj} | {qk} | {ql} | {qm} | {qn} | {qo} | {qp} | {qq} | {qr} | {qs} | {qt} | {qu} | {qv} | {qw} | {qx} | {qy} | {qz} | {ra} | {rb} | {rc} | {rd} | {re} | {rf} | {rg} | {rh} | {ri} | {rj} | {rk} | {rl} | {rm} | {rn} | {ro} | {rp} | {rq} | {rr} | {rs} | {rt} | {ru} | {rv} | {rw} | {rx} | {ry} | {rz} | {sa} | {sb} | {sc} | {sd} | {se} | {sf} | {sg} | {sh} | {si} | {sj} | {sk} | {sl} | {sm} | {sn} | {so} | {sp} | {sq} | {sr} | {ss} | {st} | {su} | {sv} | {sw} | {sx} | {sy} | {sz} | {ta} | {tb} | {tc} | {td} | {te} | {tf} | {tg} | {th} | {ti} | {tj} | {tk} | {tl} | {tm} | {tn} | {to} | {tp} | {tq} | {tr} | {ts} | {tt} | {tu} | {tv} | {tw} | {tx} | {ty} | {tz} | {ua} | {ub} | {uc} | {ud} | {ue} | {uf} | {ug} | {uh} | {ui} | {uj} | {uk} | {ul} | {um} | {un} | {uo} | {up} | {uq} | {ur} | {us} | {ut} | {uu} | {uv} | {uw} | {ux} | {uy} | {uz} | {va} | {vb} | {vc} | {vd} | {ve} | {vf} | {vg} | {vh} | {vi} | {vj} | {vk} | {vl} | {vm} | {vn} | {vo} | {vp} | {vq} | {vr} | {vs} | {vt} | {vu} | {vv} | {vw} | {vx} | {vy} | {vz} | {wa} | {wb} | {wc} | {wd} | {we} | {wf} | {wg} | {wh} | {wi} | {wj} | {wk} | {wl} | {wm} | {wn} | {wo} | {wp} | {wq} | {wr} | {ws} | {wt} | {wu} | {wv} | {ww} | {wx} | {wy} | {wz} | {xa} | {xb} | <th>{xc}</th> <th>{xd}</th> <th>{xe}</th> <th>{yf}</th> <th>{yg}</th> <th>{yh}</th> <th>{yi}</th> <th>{yj}</th> <th>{yk}</th> <th>{yl}</th> <th>{ym}</th> <th>{yn}</th> <th>{yo}</th> <th>{zp}</th> <th>{zq}</th> <th>{zr}</th> <th>{zs}</th> <th>{zt}</th> <th>{zu}</th> <th>{zv}</th> <th>{zw}</th> <th>{zx}</th> <th>{zy}</th> <th>{zz}</th> | {xc} | {xd} | {xe} | {yf} | {yg} | {yh} | {yi} | {yj} | {yk} | {yl} | {ym} | {yn} | {yo} | {zp} | {zq} | {zr} | {zs} | {zt} | {zu} | {zv} | {zw} | {zx} | {zy} | {zz} |
|--|---|---|---|---|---|---|---|---|---|---|---|---|---|---|---|---|---|---|------|------|------|------|------|------|------|------|------|------|------|------|------|------|------|------|------|------|------|------|------|------|------|------|------|------|------|------|------|------|------|------|------|------|------|------|------|------|------|------|------|------|------|------|------|------|------|------|------|------|------|------|------|------|------|------|------|------|------|------|------|------|------|------|------|------|------|------|------|------|------|------|------|------|------|------|------|------|------|------|------|------|------|------|------|------|------|------|------|------|------|------|------|------|------|------|------|------|------|------|------|------|------|------|------|------|------|------|------|------|------|------|------|------|------|------|------|------|------|------|------|------|------|------|------|------|------|------|------|------|------|------|------|------|------|------|------|------|------|------|------|------|------|------|------|------|------|------|------|------|------|------|------|------|------|------|------|------|------|------|------|------|------|------|------|------|------|------|------|------|------|------|------|------|------|------|------|------|------|------|------|------|------|------|------|------|------|------|------|------|------|------|------|------|------|------|------|------|------|------|------|------|------|------|------|------|------|------|------|------|------|------|------|------|------|------|------|------|------|------|------|------|------|------|------|------|------|------|------|------|------|------|------|------|------|------|------|------|------|------|------|------|------|------|------|------|------|------|------|------|------|------|------|------|------|------|------|------|------|------|------|------|------|------|------|------|------|------|------|------|------|------|------|------|------|------|------|------|------|------|------|------|------|------|------|------|------|------|------|------|------|------|------|------|------|------|------|------|------|------|------|------|------|------|------|------|------|------|------|------|------|------|------|------|------|------|------|------|------|------|------|------|------|------|------|------|------|------|------|------|------|------|------|------|------|------|------|------|------|------|------|------|------|------|------|------|------|------|------|------|------|------|------|------|------|------|------|------|------|------|------|------|------|------|------|------|------|------|------|------|------|------|------|------|------|------|------|------|------|------|------|------|------|------|------|------|------|------|------|------|------|------|------|------|------|------|------|------|------|------|------|------|------|------|------|------|------|------|------|------|------|------|------|------|------|------|------|------|------|------|------|------|------|------|------|------|------|------|------|------|------|------|------|------|------|------|------|------|------|------|------|------|------|------|------|------|------|------|------|------|------|------|------|------|------|------|------|------|------|------|------|------|------|------|------|------|------|------|------|------|------|------|------|------|------|------|------|------|------|------|------|------|------|------|------|------|------|------|------|------|------|------|------|------|------|------|------|------|------|------|------|------|------|------|------|------|------|------|------|------|------|------|------|------|------|------|------|------|------|------|------|------|------|------|------|------|------|------|------|------|------|------|------|------|------|------|------|------|------|------|------|------|------|------|------|------|------|------|------|------|------|------|------|------|------|------|------|------|------|------|------|------|------|------|------|------|------|------|------|------|------|------|------|------|------|------|------|------|------|------|------|------|------|------|------|------|------|------|------|------|------|------|------|------|------|------|------|------|------|-------------------------------------------------------------------------------------------------------------------------------------------------------------------------------------------------------------------------------------------------------------------------------------------------------------------------------------------------|------|------|------|------|------|------|------|------|------|------|------|------|------|------|------|------|------|------|------|------|------|------|------|------|
|--|---|---|---|---|---|---|---|---|---|---|---|---|---|---|---|---|---|---|------|------|------|------|------|------|------|------|------|------|------|------|------|------|------|------|------|------|------|------|------|------|------|------|------|------|------|------|------|------|------|------|------|------|------|------|------|------|------|------|------|------|------|------|------|------|------|------|------|------|------|------|------|------|------|------|------|------|------|------|------|------|------|------|------|------|------|------|------|------|------|------|------|------|------|------|------|------|------|------|------|------|------|------|------|------|------|------|------|------|------|------|------|------|------|------|------|------|------|------|------|------|------|------|------|------|------|------|------|------|------|------|------|------|------|------|------|------|------|------|------|------|------|------|------|------|------|------|------|------|------|------|------|------|------|------|------|------|------|------|------|------|------|------|------|------|------|------|------|------|------|------|------|------|------|------|------|------|------|------|------|------|------|------|------|------|------|------|------|------|------|------|------|------|------|------|------|------|------|------|------|------|------|------|------|------|------|------|------|------|------|------|------|------|------|------|------|------|------|------|------|------|------|------|------|------|------|------|------|------|------|------|------|------|------|------|------|------|------|------|------|------|------|------|------|------|------|------|------|------|------|------|------|------|------|------|------|------|------|------|------|------|------|------|------|------|------|------|------|------|------|------|------|------|------|------|------|------|------|------|------|------|------|------|------|------|------|------|------|------|------|------|------|------|------|------|------|------|------|------|------|------|------|------|------|------|------|------|------|------|------|------|------|------|------|------|------|------|------|------|------|------|------|------|------|------|------|------|------|------|------|------|------|------|------|------|------|------|------|------|------|------|------|------|------|------|------|------|------|------|------|------|------|------|------|------|------|------|------|------|------|------|------|------|------|------|------|------|------|------|------|------|------|------|------|------|------|------|------|------|------|------|------|------|------|------|------|------|------|------|------|------|------|------|------|------|------|------|------|------|------|------|------|------|------|------|------|------|------|------|------|------|------|------|------|------|------|------|------|------|------|------|------|------|------|------|------|------|------|------|------|------|------|------|------|------|------|------|------|------|------|------|------|------|------|------|------|------|------|------|------|------|------|------|------|------|------|------|------|------|------|------|------|------|------|------|------|------|------|------|------|------|------|------|------|------|------|------|------|------|------|------|------|------|------|------|------|------|------|------|------|------|------|------|------|------|------|------|------|------|------|------|------|------|------|------|------|------|------|------|------|------|------|------|------|------|------|------|------|------|------|------|------|------|------|------|------|------|------|------|------|------|------|------|------|------|------|------|------|------|------|------|------|------|------|------|------|------|------|------|------|------|------|------|------|------|------|------|------|------|------|------|------|------|------|------|------|------|------|------|------|------|------|------|------|------|------|------|------|------|------|------|------|------|------|------|------|------|------|------|------|------|------|------|------|------|------|------|------|------|------|------|------|------|------|------|------|------|------|------|------|------|------|------|------|------|------|------|------|-------------------------------------------------------------------------------------------------------------------------------------------------------------------------------------------------------------------------------------------------------------------------------------------------------------------------------------------------|------|------|------|------|------|------|------|------|------|------|------|------|------|------|------|------|------|------|------|------|------|------|------|------|



## STATION=QUITO - OBSERVATION=

[illegible]

**DATOS PRINCIPALES PARA IDENTIFICACION DE TORMENTA**  
**ESTACION:QUITO - OBSERVATORIO**

ESTACION:RUITO - OBSERVATORIO

9

A20 MES/DIA

|  |  |  |  |  |  |  |  |  |  |  |  |  |  |  |  |  |  |  |  |  |  |  |  |  |  |  |  |  |  |  |  |  |  |  |  |  |  |  |  |  |  |  |  |  |  |  |  |  |  |  |  |  |  |  |  |  |  |  |  |  |  |  |  |  |  |  |  |  |  |  |  |  |  |  |  |  |  |  |  |  |  |  |  |  |  |  |  |  |  |  |  |  |  |  |  |  |  |  |  |  |  |  |  |  |  |  |  |  |  |  |  |  |  |  |  |  |  |  |  |  |  |  |  |  |  |  |  |  |  |  |  |  |  |  |  |  |  |  |  |  |  |  |  |  |  |  |  |  |  |  |  |  |  |  |  |  |  |  |  |  |  |  |  |  |  |  |  |  |  |  |  |  |  |  |  |  |  |  |  |  |  |  |  |  |  |  |  |  |  |  |  |  |  |  |  |  |  |  |  |  |  |  |  |  |  |  |  |  |  |  |  |  |  |  |  |  |  |  |  |  |  |  |  |  |  |  |  |  |  |  |  |  |  |  |  |  |  |  |  |  |  |  |  |  |  |  |  |  |  |  |  |  |  |  |  |  |  |  |  |  |  |  |  |  |  |  |  |  |  |  |  |  |  |  |  |  |  |  |  |  |  |  |  |  |  |  |  |  |  |  |  |  |  |  |  |  |  |  |  |  |  |  |  |  |  |  |  |  |  |  |  |  |  |  |  |  |  |  |  |  |  |  |  |  |  |  |  |  |  |  |  |  |  |  |  |  |  |  |  |  |  |  |  |  |  |  |  |  |  |  |  |  |  |  |  |  |  |  |  |  |  |  |  |  |  |  |  |  |  |  |  |  |  |  |  |  |  |  |  |  |  |  |  |  |  |  |  |  |  |  |  |  |  |  |  |  |  |  |  |  |  |  |  |  |  |  |  |  |  |  |  |  |  |  |  |  |  |  |  |  |  |  |  |  |  |  |  |  |  |  |  |  |  |  |  |  |  |  |  |  |  |  |  |  |  |  |  |  |  |  |  |  |  |  |  |  |  |  |  |  |  |  |  |  |  |  |  |  |  |  |  |  |  |  |  |  |  |  |  |  |  |  |  |  |  |  |  |  |  |  |  |  |  |  |  |  |  |  |  |  |  |  |  |  |  |  |  |  |  |  |  |  |  |  |  |  |  |  |  |  |  |  |  |  |  |  |  |  |  |  |  |  |  |  |  |  |  |  |  |  |  |  |  |  |  |  |  |  |  |  |  |  |  |  |  |  |  |  |  |  |  |  |  |  |  |  |  |  |  |  |  |  |  |  |  |  |  |  |  |  |  |  |  |  |  |  |  |  |  |  |  |  |  |  |  |  |  |  |  |  |  |  |  |  |  |  |  |  |  |  |  |  |  |  |  |  |  |  |  |  |  |  |  |  |  |  |  |  |  |  |  |  |  |  |  |  |  |  |  |  |  |  |  |  |  |  |  |  |  |  |  |  |  |  |  |  |  |  |  |  |  |  |  |  |  |  |  |  |  |  |  |  |  |  |  |  |  |  |  |  |  |  |  |  |  |  |  |  |  |  |  |  |  |  |  |  |  |  |  |  |  |  |  |  |  |  |  |  |  |  |  |  |  |  |  |  |  |  |  |  |  |  |  |  |  |  |  |  |  |  |  |  |  |  |  |  |  |  |  |  |  |  |  |  |  |  |  |  |  |  |  |  |  |  |  |  |  |  |  |  |  |  |  |  |  |  |  |  |  |  |  |  |  |  |  |  |  |  |  |  |  |  |  |  |  |  |  |  |  |  |  |  |  |  |  |  |  |  |  |  |  |  |  |  |  |  |  |  |  |  |  |  |  |  |  |  |  |  |  |  |  |  |  |  |  |  |  |  |  |  |  |  |  |  |  |  |  |  |  |  |  |  |  |  |  |  |  |  |  |  |  |  |  |  |  |  |  |  |  |  |  |  |  |  |  |  |  |  |  |  |  |  |  |  |  |  |  |  |  |  |  |  |  |  |  |  |  |  |  |  |  |  |  |  |  |  |  |  |  |  |  |  |  |  |  |  |  |  |  |  |  |  |  |  |  |  |  |  |  |  |  |  |  |  |  |  |  |  |  |  |  |  |  |  |  |  |  |  |  |  |  |  |  |  |  |  |  |  |  |  |  |  |  |  |  |  |  |  |  |  |  |  |  |  |  |  |  |  |  |  |  |  |  |  |  |  |  |  |  |  |  |  |  |  |  |  |  |  |  |  |  |  |  |  |  |  |  |  |  |  |  |  |  |  |  |  |  |  |  |  |  |  |  |  |  |  |  |  |  |  |  |  |  |  |  |  |  |  |  |  |  |  |  |  |  |  |  |  |  |  |  |  |  |  |  |  |  |  |  |  |  |  |  |  |  |  |  |  |  |  |  |  |  |  |  |  |  |  |  |  |  |  |  |  |  |  |  |  |  |  |  |  |  |  |  |  |  |  |  |  |  |  |  |  |  |  |  |  |  |  |  |  |  |  |  |  |  |  |  |  |  |  |  |  |  |  |  |  |  |  |  |  |  |  |  |  |  |  |  |  |  |  |  |  |  |  |  |  |  |  |  |  |  |  |  |  |  |  |  |  |  |  |  |  |  |  |  |  |  |  |  |  |  |  |  |  |  |  |  |  |  |  |  |  |  |  |  |  |  |  |  |  |  |  |  |  |  |  |  |  |  |  |  |  |  |  |  |  |  |  |  |  |  |  |  |  |  |  |  |  |  |  |  |  |  |  |  |  |  |  |  |  |  |  |  |  |  |  |  |  |  |  |  |  |  |  |  |  |  |  |  |  |  |  |  |  |  |  |  |  |  |  |  |  |  |  |  |  |  |  |  |  |  |  |  |  |  |  |  |  |  |  |  |  |  |  |  |  |  |  |  |  |  |  |  |  |  |  |  |  |  |  |  |  |  |  |  |  |  |  |  |  |  |  |  |  |  |  |  |  |  |  |  |  |  |  |  |  |  |  |  |  |  |  |  |  |  |  |  |  |  |  |  |  |  |  |  |  | </ |
|--|--|--|--|--|--|--|--|--|--|--|--|--|--|--|--|--|--|--|--|--|--|--|--|--|--|--|--|--|--|--|--|--|--|--|--|--|--|--|--|--|--|--|--|--|--|--|--|--|--|--|--|--|--|--|--|--|--|--|--|--|--|--|--|--|--|--|--|--|--|--|--|--|--|--|--|--|--|--|--|--|--|--|--|--|--|--|--|--|--|--|--|--|--|--|--|--|--|--|--|--|--|--|--|--|--|--|--|--|--|--|--|--|--|--|--|--|--|--|--|--|--|--|--|--|--|--|--|--|--|--|--|--|--|--|--|--|--|--|--|--|--|--|--|--|--|--|--|--|--|--|--|--|--|--|--|--|--|--|--|--|--|--|--|--|--|--|--|--|--|--|--|--|--|--|--|--|--|--|--|--|--|--|--|--|--|--|--|--|--|--|--|--|--|--|--|--|--|--|--|--|--|--|--|--|--|--|--|--|--|--|--|--|--|--|--|--|--|--|--|--|--|--|--|--|--|--|--|--|--|--|--|--|--|--|--|--|--|--|--|--|--|--|--|--|--|--|--|--|--|--|--|--|--|--|--|--|--|--|--|--|--|--|--|--|--|--|--|--|--|--|--|--|--|--|--|--|--|--|--|--|--|--|--|--|--|--|--|--|--|--|--|--|--|--|--|--|--|--|--|--|--|--|--|--|--|--|--|--|--|--|--|--|--|--|--|--|--|--|--|--|--|--|--|--|--|--|--|--|--|--|--|--|--|--|--|--|--|--|--|--|--|--|--|--|--|--|--|--|--|--|--|--|--|--|--|--|--|--|--|--|--|--|--|--|--|--|--|--|--|--|--|--|--|--|--|--|--|--|--|--|--|--|--|--|--|--|--|--|--|--|--|--|--|--|--|--|--|--|--|--|--|--|--|--|--|--|--|--|--|--|--|--|--|--|--|--|--|--|--|--|--|--|--|--|--|--|--|--|--|--|--|--|--|--|--|--|--|--|--|--|--|--|--|--|--|--|--|--|--|--|--|--|--|--|--|--|--|--|--|--|--|--|--|--|--|--|--|--|--|--|--|--|--|--|--|--|--|--|--|--|--|--|--|--|--|--|--|--|--|--|--|--|--|--|--|--|--|--|--|--|--|--|--|--|--|--|--|--|--|--|--|--|--|--|--|--|--|--|--|--|--|--|--|--|--|--|--|--|--|--|--|--|--|--|--|--|--|--|--|--|--|--|--|--|--|--|--|--|--|--|--|--|--|--|--|--|--|--|--|--|--|--|--|--|--|--|--|--|--|--|--|--|--|--|--|--|--|--|--|--|--|--|--|--|--|--|--|--|--|--|--|--|--|--|--|--|--|--|--|--|--|--|--|--|--|--|--|--|--|--|--|--|--|--|--|--|--|--|--|--|--|--|--|--|--|--|--|--|--|--|--|--|--|--|--|--|--|--|--|--|--|--|--|--|--|--|--|--|--|--|--|--|--|--|--|--|--|--|--|--|--|--|--|--|--|--|--|--|--|--|--|--|--|--|--|--|--|--|--|--|--|--|--|--|--|--|--|--|--|--|--|--|--|--|--|--|--|--|--|--|--|--|--|--|--|--|--|--|--|--|--|--|--|--|--|--|--|--|--|--|--|--|--|--|--|--|--|--|--|--|--|--|--|--|--|--|--|--|--|--|--|--|--|--|--|--|--|--|--|--|--|--|--|--|--|--|--|--|--|--|--|--|--|--|--|--|--|--|--|--|--|--|--|--|--|--|--|--|--|--|--|--|--|--|--|--|--|--|--|--|--|--|--|--|--|--|--|--|--|--|--|--|--|--|--|--|--|--|--|--|--|--|--|--|--|--|--|--|--|--|--|--|--|--|--|--|--|--|--|--|--|--|--|--|--|--|--|--|--|--|--|--|--|--|--|--|--|--|--|--|--|--|--|--|--|--|--|--|--|--|--|--|--|--|--|--|--|--|--|--|--|--|--|--|--|--|--|--|--|--|--|--|--|--|--|--|--|--|--|--|--|--|--|--|--|--|--|--|--|--|--|--|--|--|--|--|--|--|--|--|--|--|--|--|--|--|--|--|--|--|--|--|--|--|--|--|--|--|--|--|--|--|--|--|--|--|--|--|--|--|--|--|--|--|--|--|--|--|--|--|--|--|--|--|--|--|--|--|--|--|--|--|--|--|--|--|--|--|--|--|--|--|--|--|--|--|--|--|--|--|--|--|--|--|--|--|--|--|--|--|--|--|--|--|--|--|--|--|--|--|--|--|--|--|--|--|--|--|--|--|--|--|--|--|--|--|--|--|--|--|--|--|--|--|--|--|--|--|--|--|--|--|--|--|--|--|--|--|--|--|--|--|--|--|--|--|--|--|--|--|--|--|--|--|--|--|--|--|--|--|--|--|--|--|--|--|--|--|--|--|--|--|--|--|--|--|--|--|--|--|--|--|--|--|--|--|--|--|--|--|--|--|--|--|--|--|--|--|--|--|--|--|--|--|--|--|--|--|--|--|--|--|--|--|--|--|--|--|--|--|--|--|--|--|--|--|--|--|--|--|--|--|--|--|--|--|--|--|--|--|--|--|--|--|--|--|--|--|--|--|--|--|--|--|--|--|--|--|--|--|--|--|--|--|--|--|--|--|--|--|--|--|--|--|--|--|--|--|--|--|--|--|--|--|--|--|--|--|--|--|--|--|--|--|--|--|--|--|--|--|--|--|--|--|--|--|--|--|--|--|--|--|--|--|--|--|--|--|--|--|--|--|--|--|--|--|--|--|--|--|--|--|--|--|--|--|--|--|--|--|--|--|--|--|--|--|--|--|--|--|--|--|--|--|--|--|--|--|--|--|--|--|--|--|--|--|--|--|--|--|--|--|--|--|--|--|--|--|--|--|--|--|--|--|--|--|--|--|--|--|--|--|--|--|--|--|--|--|--|--|--|--|--|--|--|--|--|--|--|--|--|--|--|--|--|--|--|--|--|--|--|--|--|--|--|--|--|--|--|--|--|--|--|--|--|--|--|--|----|
|--|--|--|--|--|--|--|--|--|--|--|--|--|--|--|--|--|--|--|--|--|--|--|--|--|--|--|--|--|--|--|--|--|--|--|--|--|--|--|--|--|--|--|--|--|--|--|--|--|--|--|--|--|--|--|--|--|--|--|--|--|--|--|--|--|--|--|--|--|--|--|--|--|--|--|--|--|--|--|--|--|--|--|--|--|--|--|--|--|--|--|--|--|--|--|--|--|--|--|--|--|--|--|--|--|--|--|--|--|--|--|--|--|--|--|--|--|--|--|--|--|--|--|--|--|--|--|--|--|--|--|--|--|--|--|--|--|--|--|--|--|--|--|--|--|--|--|--|--|--|--|--|--|--|--|--|--|--|--|--|--|--|--|--|--|--|--|--|--|--|--|--|--|--|--|--|--|--|--|--|--|--|--|--|--|--|--|--|--|--|--|--|--|--|--|--|--|--|--|--|--|--|--|--|--|--|--|--|--|--|--|--|--|--|--|--|--|--|--|--|--|--|--|--|--|--|--|--|--|--|--|--|--|--|--|--|--|--|--|--|--|--|--|--|--|--|--|--|--|--|--|--|--|--|--|--|--|--|--|--|--|--|--|--|--|--|--|--|--|--|--|--|--|--|--|--|--|--|--|--|--|--|--|--|--|--|--|--|--|--|--|--|--|--|--|--|--|--|--|--|--|--|--|--|--|--|--|--|--|--|--|--|--|--|--|--|--|--|--|--|--|--|--|--|--|--|--|--|--|--|--|--|--|--|--|--|--|--|--|--|--|--|--|--|--|--|--|--|--|--|--|--|--|--|--|--|--|--|--|--|--|--|--|--|--|--|--|--|--|--|--|--|--|--|--|--|--|--|--|--|--|--|--|--|--|--|--|--|--|--|--|--|--|--|--|--|--|--|--|--|--|--|--|--|--|--|--|--|--|--|--|--|--|--|--|--|--|--|--|--|--|--|--|--|--|--|--|--|--|--|--|--|--|--|--|--|--|--|--|--|--|--|--|--|--|--|--|--|--|--|--|--|--|--|--|--|--|--|--|--|--|--|--|--|--|--|--|--|--|--|--|--|--|--|--|--|--|--|--|--|--|--|--|--|--|--|--|--|--|--|--|--|--|--|--|--|--|--|--|--|--|--|--|--|--|--|--|--|--|--|--|--|--|--|--|--|--|--|--|--|--|--|--|--|--|--|--|--|--|--|--|--|--|--|--|--|--|--|--|--|--|--|--|--|--|--|--|--|--|--|--|--|--|--|--|--|--|--|--|--|--|--|--|--|--|--|--|--|--|--|--|--|--|--|--|--|--|--|--|--|--|--|--|--|--|--|--|--|--|--|--|--|--|--|--|--|--|--|--|--|--|--|--|--|--|--|--|--|--|--|--|--|--|--|--|--|--|--|--|--|--|--|--|--|--|--|--|--|--|--|--|--|--|--|--|--|--|--|--|--|--|--|--|--|--|--|--|--|--|--|--|--|--|--|--|--|--|--|--|--|--|--|--|--|--|--|--|--|--|--|--|--|--|--|--|--|--|--|--|--|--|--|--|--|--|--|--|--|--|--|--|--|--|--|--|--|--|--|--|--|--|--|--|--|--|--|--|--|--|--|--|--|--|--|--|--|--|--|--|--|--|--|--|--|--|--|--|--|--|--|--|--|--|--|--|--|--|--|--|--|--|--|--|--|--|--|--|--|--|--|--|--|--|--|--|--|--|--|--|--|--|--|--|--|--|--|--|--|--|--|--|--|--|--|--|--|--|--|--|--|--|--|--|--|--|--|--|--|--|--|--|--|--|--|--|--|--|--|--|--|--|--|--|--|--|--|--|--|--|--|--|--|--|--|--|--|--|--|--|--|--|--|--|--|--|--|--|--|--|--|--|--|--|--|--|--|--|--|--|--|--|--|--|--|--|--|--|--|--|--|--|--|--|--|--|--|--|--|--|--|--|--|--|--|--|--|--|--|--|--|--|--|--|--|--|--|--|--|--|--|--|--|--|--|--|--|--|--|--|--|--|--|--|--|--|--|--|--|--|--|--|--|--|--|--|--|--|--|--|--|--|--|--|--|--|--|--|--|--|--|--|--|--|--|--|--|--|--|--|--|--|--|--|--|--|--|--|--|--|--|--|--|--|--|--|--|--|--|--|--|--|--|--|--|--|--|--|--|--|--|--|--|--|--|--|--|--|--|--|--|--|--|--|--|--|--|--|--|--|--|--|--|--|--|--|--|--|--|--|--|--|--|--|--|--|--|--|--|--|--|--|--|--|--|--|--|--|--|--|--|--|--|--|--|--|--|--|--|--|--|--|--|--|--|--|--|--|--|--|--|--|--|--|--|--|--|--|--|--|--|--|--|--|--|--|--|--|--|--|--|--|--|--|--|--|--|--|--|--|--|--|--|--|--|--|--|--|--|--|--|--|--|--|--|--|--|--|--|--|--|--|--|--|--|--|--|--|--|--|--|--|--|--|--|--|--|--|--|--|--|--|--|--|--|--|--|--|--|--|--|--|--|--|--|--|--|--|--|--|--|--|--|--|--|--|--|--|--|--|--|--|--|--|--|--|--|--|--|--|--|--|--|--|--|--|--|--|--|--|--|--|--|--|--|--|--|--|--|--|--|--|--|--|--|--|--|--|--|--|--|--|--|--|--|--|--|--|--|--|--|--|--|--|--|--|--|--|--|--|--|--|--|--|--|--|--|--|--|--|--|--|--|--|--|--|--|--|--|--|--|--|--|--|--|--|--|--|--|--|--|--|--|--|--|--|--|--|--|--|--|--|--|--|--|--|--|--|--|--|--|--|--|--|--|--|--|--|--|--|--|--|--|--|--|--|--|--|--|--|--|--|--|--|--|--|--|--|--|--|--|--|--|--|--|--|--|--|--|--|--|--|--|--|--|--|--|--|--|--|--|--|--|--|--|--|--|--|--|--|--|--|--|--|--|--|--|--|--|--|--|--|--|--|--|--|--|--|--|--|--|--|--|--|--|--|--|--|--|--|--|--|--|--|--|--|--|--|--|--|----|



DATOS PRINCIPALES PARA IDENTIFICACION DE TORMENTA  
 ESTACION: QUITO - OBSERVATORIO

[illegible]

ESTACION: QUITO - OBSERVATORIO

[illegible]

[illegible]

## ESL ACTION = NEEDED

[illegible]



ESTACION: INARQUITO

4

ESTACION: INAHUATIT

| FAZD    | MES: DIA | HI    | HF    | DUR    | h1   | p1   | h2   | p2   | h3   | p3   | h4   | p4   | h5   | p5   | h6   | p6   | h7   | p7   | h8   | p8   | h9   | p9   | h10  | p10  | h11  | p11  | h12  | p12  | h13  | p13  |
|---------|----------|-------|-------|--------|------|------|------|------|------|------|------|------|------|------|------|------|------|------|------|------|------|------|------|------|------|------|------|------|------|------|
|         |          | (h.)  | (h.)  | (min)  | (h.) | (mm) | (h.) | (mm) | (h.) | (mm) | (h.) | (mm) | (h.) | (mm) | (h.) | (mm) | (h.) | (mm) | (h.) | (mm) | (h.) | (mm) | (h.) | (mm) | (h.) | (mm) | (h.) | (mm) | (h.) | (mm) |
| 1985:11 | 14       | 6.00  | 22.00 | 860.0  | 6.0  | 0.0  | 7.9  | 2.3  | 8.8  | 6.3  | 12.8 | 6.5  | 14.3 | 13.5 | 16.5 | 21.3 | 22.0 | 24.1 |      |      |      |      |      |      |      |      |      |      |      |      |
| 1985:10 | 9        | 12.17 | 14.33 | 129.0  | 12.2 | 0.0  | 13.2 | 8.5  | 14.3 | 9.4  |      |      |      |      |      |      |      |      |      |      |      |      |      |      |      |      |      |      |      |      |
| 1985:9  | 9        | 6.00  | 9.50  | 210.0  | 6.0  | 0.0  | 6.3  | 4.9  | 6.5  | 5.0  | 7.0  | 15.0 | 7.5  | 16.2 | 8.5  | 16.2 | 9.5  | 17.6 |      |      |      |      |      |      |      |      |      |      |      |      |
| 1985:3  | 19       | 6.33  | 13.17 | 1490.0 | 6.3  | 0.0  | 8.0  | 8.5  | 8.5  | 8.9  | 16.1 | 8.9  | 17.5 | 26.7 | 19.0 | 27.2 | 20.0 | 32.0 | 24.0 | 34.3 | 26.0 | 41.0 | 30.2 | 41.2 | 31.2 | 43.2 |      |      |      |      |
| 1983:8  | 130      | 13.92 | 16.00 | 124.0  | 13.9 | 0.0  | 15.0 | 62.0 | 16.0 | 64.1 |      |      |      |      |      |      |      |      |      |      |      |      |      |      |      |      |      |      |      |      |
| 1983:5  | 124      | 16.00 | 19.00 | 180.0  | 16.0 | 0.0  | 16.7 | 16.0 | 16.8 | 16.3 | 19.0 | 17.4 |      |      |      |      |      |      |      |      |      |      |      |      |      |      |      |      |      |      |
| 1983:4  | 112      | 15.83 | 18.25 | 145.0  | 15.8 | 0.0  | 16.5 | 9.8  | 16.9 | 17.0 | 17.0 | 17.5 | 17.2 | 25.5 | 17.4 | 26.1 | 17.5 | 33.0 | 17.8 | 35.0 | 18.1 | 38.5 | 18.3 | 40.4 |      |      |      |      |      |      |
| 1983:3  | 7        | 14.87 | 24.50 | 577.0  | 14.9 | 0.0  | 15.3 | 10.0 | 17.3 | 10.7 | 17.5 | 12.2 | 17.9 | 12.8 | 18.3 | 17.3 | 18.7 | 20.7 | 20.3 | 28.5 | 21.2 | 29.6 | 22.4 | 32.1 | 24.5 | 33.1 |      |      |      |      |
| 1983:2  | 7        | 18.33 | 28.33 | 600.0  | 18.3 | 0.0  | 21.7 | 1.3  | 27.0 | 17.0 | 27.4 | 19.5 | 27.8 | 21.0 | 28.3 | 21.5 |      |      |      |      |      |      |      |      |      |      |      |      |      |      |
| 1982:12 | 17       | 21.83 | 30.33 | 510.0  | 21.8 | 0.0  | 22.2 | 4.0  | 23.7 | 9.5  | 24.2 | 10.5 | 25.7 | 11.1 | 26.5 | 18.1 | 26.8 | 18.5 | 27.7 | 21.5 | 28.8 | 22.3 | 30.0 | 28.4 | 30.3 | 28.7 |      |      |      |      |
| 1982:12 | 7        | 14.17 | 16.50 | 139.0  | 14.2 | 0.0  | 14.3 | 1.5  | 14.8 | 22.5 | 15.0 | 24.0 | 16.5 | 28.3 |      |      |      |      |      |      |      |      |      |      |      |      |      |      |      |      |
| 1982:11 | 119      | 14.00 | 15.33 | 79.0   | 14.0 | 0.0  | 14.2 | 0.5  | 14.5 | 0.8  | 14.8 | 2.0  | 15.3 | 2.8  |      |      |      |      |      |      |      |      |      |      |      |      |      |      |      |      |
| 1982:10 | 126      | 14.13 | 17.75 | 217.0  | 14.1 | 0.0  | 14.4 | 21.5 | 14.8 | 25.4 | 15.5 | 27.0 | 16.4 | 27.0 | 17.8 | 28.3 |      |      |      |      |      |      |      |      |      |      |      |      |      |      |
| 1982:10 | 4        | 15.17 | 17.83 | 159.0  | 15.2 | 0.0  | 15.5 | 0.4  | 17.3 | 6.4  | 17.8 | 7.0  |      |      |      |      |      |      |      |      |      |      |      |      |      |      |      |      |      |      |
| 1982:9  | 119      | 15.50 | 17.33 | 109.0  | 15.5 | 0.0  | 15.6 | 0.9  | 15.8 | 1.0  | 16.2 | 1.5  | 16.6 | 2.8  | 16.8 | 7.2  | 17.3 | 9.5  |      |      |      |      |      |      |      |      |      |      |      |      |
| 1982:5  | 129      | 15.33 | 16.42 | 65.0   | 15.3 | 0.0  | 15.7 | 22.0 | 15.8 | 24.7 | 16.4 | 26.8 |      |      |      |      |      |      |      |      |      |      |      |      |      |      |      |      |      |      |
| 1982:1  | 124      | 12.83 | 27.83 | 180.0  | 24.8 | 0.0  | 25.1 | 2.5  | 25.5 | 12.1 | 26.2 | 19.6 | 26.3 | 20.1 | 26.8 | 30.4 | 27.0 | 31.5 | 27.8 | 32.5 |      |      |      |      |      |      |      |      |      |      |
| 1981:12 | 1        | 13.42 | 22.83 | 564.0  | 13.4 | 0.0  | 15.7 | 3.4  | 16.7 | 3.4  | 17.4 | 4.6  | 21.9 | 19.6 | 22.5 | 23.5 | 22.8 | 24.0 |      |      |      |      |      |      |      |      |      |      |      |      |
| 1981:11 | 9        | 15.67 | 18.50 | 169.0  | 15.7 | 0.0  | 16.0 | 3.3  | 16.7 | 4.9  | 17.3 | 5.5  | 18.5 | 6.0  |      |      |      |      |      |      |      |      |      |      |      |      |      |      |      |      |
| 1981:10 | 130      | 14.00 | 15.75 | 105.0  | 14.0 | 0.0  | 14.3 | 0.4  | 15.3 | 21.0 | 15.8 | 24.6 |      |      |      |      |      |      |      |      |      |      |      |      |      |      |      |      |      |      |
| 1981:8  | 123      | 17.12 | 18.67 | 93.0   | 17.1 | 0.0  | 17.4 | 1.6  | 18.3 | 2.0  | 18.7 | 3.0  |      |      |      |      |      |      |      |      |      |      |      |      |      |      |      |      |      |      |
| 1981:4  | 6        | 15.92 | 19.83 | 234.0  | 15.9 | 0.0  | 16.1 | 6.0  | 16.8 | 15.3 | 17.0 | 15.6 | 17.8 | 15.7 | 18.8 | 22.5 | 19.1 | 25.0 | 19.8 | 26.3 |      |      |      |      |      |      |      |      |      |      |
| 1981:3  | 121      | 17.00 | 29.50 | 750.0  | 17.0 | 0.0  | 19.0 | 1.0  | 19.3 | 3.2  | 19.5 | 3.5  | 20.2 | 3.7  | 21.7 | 7.8  | 22.8 | 8.4  | 23.8 | 9.8  | 26.0 | 12.4 | 29.5 | 14.3 |      |      |      |      |      |      |
| 1980:12 | 126      | 14.67 | 19.00 | 259.0  | 14.7 | 0.0  | 15.0 | 0.5  | 15.3 | 1.5  | 16.3 | 3.0  | 16.8 | 3.8  | 19.0 | 4.0  |      |      |      |      |      |      |      |      |      |      |      |      |      |      |
| 1980:11 | 128      | 14.67 | 17.00 | 139.0  | 14.7 | 0.0  | 14.8 | 1.1  | 15.4 | 1.4  | 15.5 | 2.0  | 15.7 | 2.5  | 16.0 | 2.8  | 16.3 | 5.5  | 17.0 | 6.8  |      |      |      |      |      |      |      |      |      |      |
| 1980:10 | 120      | 15.50 | 16.33 | 49.0   | 15.5 | 0.0  | 15.8 | 0.9  | 16.0 | 1.8  | 16.3 | 2.5  |      |      |      |      |      |      |      |      |      |      |      |      |      |      |      |      |      |      |
| 1980:10 | 8        | 15.25 | 26.00 | 645.0  | 15.3 | 0.0  | 15.5 | 5.5  | 17.2 | 10.0 | 18.7 | 13.0 | 19.8 | 16.5 | 22.8 | 20.0 | 24.5 | 22.5 | 26.0 | 25.7 |      |      |      |      |      |      |      |      |      |      |
| 1980:10 | 5        | 19.33 | 29.83 | 630.0  | 19.3 | 0.0  | 21.0 | 3.0  | 22.0 | 7.3  | 23.6 | 11.9 | 25.3 | 14.8 | 25.8 | 17.5 | 26.3 | 21.6 | 28.3 | 26.2 | 29.8 | 27.4 |      |      |      |      |      |      |      |      |

[illegible]

STATION: IZ08AMB3A

1

[illegible]



## ESTACION: Z08AMB4

[illegible]



[illegible]

## ESTACION: TOLA

[illegible]



## DATOS PRINCIPALES PARA IDENTIFICACION DE TORMENTA

ESTACION: TOLA

3

| LAZD | WES | DTA | (h.)  | (min) | (h.)  | (mm) | (h.) | (mm) | (h.) | (mm) | (h.) | (mm) | (h.) | (mm) | (h.) | (mm) | (h.) | (mm) | (h.) | (mm) | (h.) | (mm) | (h.) | (mm) | (h.) | (mm) | (h.) | (mm) | (h.) | (mm) | (h.) | (mm) |
|------|-----|-----|-------|-------|-------|------|------|------|------|------|------|------|------|------|------|------|------|------|------|------|------|------|------|------|------|------|------|------|------|------|------|------|
| 1985 | 10  | 11  | 15.05 | 16.25 | 72.0  | 15.1 | 0.0  | 15.9 | 30.8 | 16.3 | 32.8 | 1    | 1    | 1    | 1    | 1    | 1    | 1    | 1    | 1    | 1    | 1    | 1    | 1    | 1    | 1    | 1    | 1    | 1    | 1    | 1    | 1    |
| 1985 | 10  | 10  | 16.42 | 18.75 | 140.0 | 16.4 | 0.0  | 16.9 | 22.6 | 17.0 | 23.8 | 17.2 | 24.4 | 18.8 | 25.4 | 1    | 1    | 1    | 1    | 1    | 1    | 1    | 1    | 1    | 1    | 1    | 1    | 1    | 1    | 1    | 1    | 1    |
| 1985 | 10  | 9   | 14.53 | 15.50 | 58.0  | 14.5 | 0.0  | 14.8 | 1.6  | 15.5 | 2.1  | 1    | 1    | 1    | 1    | 1    | 1    | 1    | 1    | 1    | 1    | 1    | 1    | 1    | 1    | 1    | 1    | 1    | 1    | 1    | 1    | 1    |
| 1985 | 9   | 129 | 15.08 | 19.75 | 280.0 | 15.1 | 0.0  | 15.4 | 0.5  | 16.0 | 7.0  | 16.8 | 25.5 | 17.5 | 27.6 | 18.6 | 27.7 | 19.0 | 37.8 | 19.8 | 44.8 | 1    | 1    | 1    | 1    | 1    | 1    | 1    | 1    | 1    | 1    | 1    |
| 1985 | 5   | 110 | 17.75 | 28.17 | 625.0 | 17.8 | 0.0  | 17.8 | 0.7  | 19.8 | 3.3  | 20.3 | 5.3  | 20.7 | 8.5  | 21.3 | 10.0 | 21.8 | 12.0 | 22.7 | 20.0 | 22.9 | 21.5 | 23.3 | 22.5 | 24.0 | 30.0 | 24.3 | 31.3 | 25.7 | 39.3 | 1    |
| 1985 | 1   | 1   | 1     | 1     | 28.2  | 44.3 | 1    | 1    | 1    | 1    | 1    | 1    | 1    | 1    | 1    | 1    | 1    | 1    | 1    | 1    | 1    | 1    | 1    | 1    | 1    | 1    | 1    | 1    | 1    | 1    | 1    | 1    |
| 1985 | 5   | 5   | 13.67 | 15.92 | 135.0 | 13.7 | 0.0  | 13.7 | 0.2  | 15.0 | 0.2  | 15.7 | 0.9  | 15.9 | 1.6  | 16.0 | 1.6  | 16.0 | 1.6  | 16.0 | 1.6  | 16.0 | 1.6  | 16.0 | 1.6  | 16.0 | 1.6  | 16.0 | 1.6  | 16.0 | 1.6  | 16.0 |
| 1985 | 3   | 5   | 14.83 | 19.33 | 270.0 | 14.8 | 0.0  | 15.3 | 1.0  | 15.8 | 16.0 | 17.0 | 18.6 | 18.2 | 25.0 | 19.3 | 27.3 | 1    | 1    | 1    | 1    | 1    | 1    | 1    | 1    | 1    | 1    | 1    | 1    | 1    | 1    | 1    |
| 1984 | 11  | 124 | 14.00 | 30.00 | 360.0 | 14.0 | 0.0  | 24.8 | 7.0  | 25.5 | 10.0 | 27.1 | 20.0 | 27.4 | 23.0 | 27.5 | 27.8 | 30.0 | 29.0 | 1    | 1    | 1    | 1    | 1    | 1    | 1    | 1    | 1    | 1    | 1    | 1    | 1    |
| 1984 | 10  | 123 | 14.67 | 18.83 | 250.0 | 14.7 | 0.0  | 16.0 | 0.7  | 16.6 | 16.8 | 17.9 | 17.4 | 18.8 | 19.5 | 1    | 1    | 1    | 1    | 1    | 1    | 1    | 1    | 1    | 1    | 1    | 1    | 1    | 1    | 1    | 1    | 1    |
| 1984 | 9   | 121 | 19.17 | 31.17 | 720.0 | 19.2 | 0.0  | 20.3 | 1.0  | 22.0 | 7.2  | 23.3 | 10.0 | 25.3 | 16.0 | 26.2 | 20.0 | 29.5 | 29.0 | 31.2 | 31.5 | 1    | 1    | 1    | 1    | 1    | 1    | 1    | 1    | 1    | 1    | 1    |
| 1984 | 8   | 120 | 19.00 | 21.17 | 130.0 | 19.0 | 0.0  | 19.5 | 1.7  | 19.7 | 4.7  | 21.2 | 9.8  | 1    | 1    | 1    | 1    | 1    | 1    | 1    | 1    | 1    | 1    | 1    | 1    | 1    | 1    | 1    | 1    | 1    | 1    | 1    |
| 1984 | 4   | 130 | 12.00 | 27.50 | 330.0 | 12.0 | 0.0  | 23.7 | 0.6  | 24.8 | 3.3  | 27.2 | 3.7  | 27.5 | 4.3  | 1    | 1    | 1    | 1    | 1    | 1    | 1    | 1    | 1    | 1    | 1    | 1    | 1    | 1    | 1    | 1    | 1    |
| 1984 | 2   | 116 | 15.33 | 27.00 | 700.0 | 15.3 | 0.0  | 19.0 | 5.0  | 27.0 | 7.0  | 1    | 1    | 1    | 1    | 1    | 1    | 1    | 1    | 1    | 1    | 1    | 1    | 1    | 1    | 1    | 1    | 1    | 1    | 1    | 1    | 1    |
| 1984 | 2   | 110 | 14.83 | 15.00 | 10.0  | 14.8 | 0.0  | 15.0 | 0.4  | 1    | 1    | 1    | 1    | 1    | 1    | 1    | 1    | 1    | 1    | 1    | 1    | 1    | 1    | 1    | 1    | 1    | 1    | 1    | 1    | 1    | 1    | 1    |
| 1983 | 10  | 125 | 15.00 | 17.42 | 145.0 | 15.0 | 0.0  | 15.5 | 39.0 | 15.8 | 48.0 | 16.0 | 50.0 | 17.4 | 58.0 | 1    | 1    | 1    | 1    | 1    | 1    | 1    | 1    | 1    | 1    | 1    | 1    | 1    | 1    | 1    | 1    | 1    |
| 1983 | 8   | 130 | 16.00 | 17.17 | 70.0  | 16.0 | 0.0  | 17.0 | 0.4  | 17.2 | 1.4  | 1    | 1    | 1    | 1    | 1    | 1    | 1    | 1    | 1    | 1    | 1    | 1    | 1    | 1    | 1    | 1    | 1    | 1    | 1    | 1    | 1    |
| 1983 | 5   | 124 | 15.25 | 16.00 | 45.0  | 15.3 | 0.0  | 15.3 | 2.0  | 16.0 | 2.5  | 1    | 1    | 1    | 1    | 1    | 1    | 1    | 1    | 1    | 1    | 1    | 1    | 1    | 1    | 1    | 1    | 1    | 1    | 1    | 1    | 1    |
| 1983 | 3   | 129 | 17.17 | 27.00 | 590.0 | 17.2 | 0.0  | 19.7 | 18.3 | 19.8 | 20.0 | 20.3 | 22.3 | 24.5 | 24.3 | 27.0 | 27.0 | 1    | 1    | 1    | 1    | 1    | 1    | 1    | 1    | 1    | 1    | 1    | 1    | 1    | 1    | 1    |
| 1983 | 3   | 114 | 15.67 | 18.00 | 140.0 | 15.7 | 0.0  | 16.2 | 0.7  | 17.2 | 0.8  | 18.0 | 1.8  | 1    | 1    | 1    | 1    | 1    | 1    | 1    | 1    | 1    | 1    | 1    | 1    | 1    | 1    | 1    | 1    | 1    | 1    | 1    |
| 1983 | 2   | 7   | 19.30 | 24.00 | 282.0 | 19.3 | 0.0  | 19.4 | 8.7  | 19.7 | 4.8  | 20.2 | 5.4  | 20.7 | 16.8 | 20.8 | 17.3 | 21.8 | 17.5 | 23.0 | 27.4 | 24.0 | 30.0 | 1    | 1    | 1    | 1    | 1    | 1    | 1    | 1    | 1    |
| 1982 | 12  | 7   | 14.92 | 16.33 | 85.0  | 14.9 | 0.0  | 15.3 | 2.0  | 15.5 | 2.5  | 16.3 | 2.8  | 1    | 1    | 1    | 1    | 1    | 1    | 1    | 1    | 1    | 1    | 1    | 1    | 1    | 1    | 1    | 1    | 1    | 1    | 1    |
| 1982 | 11  | 119 | 13.97 | 16.50 | 152.0 | 14.0 | 0.0  | 15.0 | 3.7  | 15.4 | 4.0  | 15.6 | 4.8  | 16.5 | 5.5  | 1    | 1    | 1    | 1    | 1    | 1    | 1    | 1    | 1    | 1    | 1    | 1    | 1    | 1    | 1    | 1    | 1    |
| 1982 | 11  | 115 | 13.83 | 15.50 | 100.0 | 13.8 | 0.0  | 14.0 | 0.9  | 14.3 | 1.0  | 14.5 | 14.0 | 14.8 | 20.0 | 15.2 | 21.3 | 15.5 | 22.8 | 1    | 1    | 1    | 1    | 1    | 1    | 1    | 1    | 1    | 1    | 1    | 1    | 1    |
| 1982 | 10  | 119 | 17.58 | 20.67 | 185.0 | 17.6 | 0.0  | 17.8 | 4.4  | 18.0 | 4.5  | 18.1 | 7.2  | 18.7 | 20.0 | 19.0 | 21.5 | 19.5 | 22.3 | 19.9 | 22.4 | 20.1 | 23.4 | 20.7 | 23.8 | 1    | 1    | 1    | 1    | 1    | 1    | 1    |
| 1982 | 10  | 4   | 15.50 | 17.33 | 110.0 | 15.5 | 0.0  | 16.5 | 1.0  | 17.0 | 2.6  | 17.3 | 2.8  | 1    | 1    | 1    | 1    | 1    | 1    | 1    | 1    | 1    | 1    | 1    | 1    | 1    | 1    | 1    | 1    | 1    | 1    | 1    |
| 1982 | 9   | 126 | 15.08 | 16.00 | 55.0  | 15.1 | 0.0  | 15.1 | 10.0 | 15.3 | 20.0 | 15.7 | 23.0 | 16.0 | 23.6 | 1    | 1    | 1    | 1    | 1    | 1    | 1    | 1    | 1    | 1    | 1    | 1    | 1    | 1    | 1    | 1    | 1    |
| 1982 | 9   | 119 | 14.25 | 16.50 | 135.0 | 14.3 | 0.0  | 15.0 | 1.8  | 16.4 | 1.9  | 16.5 | 2.2  | 1    | 1    | 1    | 1    | 1    | 1    | 1    | 1    | 1    | 1    | 1    | 1    | 1    | 1    | 1    | 1    | 1    | 1    | 1    |

DARBO X MAL INICIO

[illegible]

[illegible]



[illegible]

**A N E X O      N° 2**

INTENSIDADES MAXIMAS PARA DIFERENTES DURACIONES (mm/h)  
ESTACION: QUITO-OBSERVATORIO

10

| ! ano  | ! 5min!  | ! 10min  | ! 15min  | ! 20min! | ! 30min | ! 1h   | ! 2h    | ! 3h   | ! 6h    | ! 12h! | ! 24h |        |
|--------|----------|----------|----------|----------|---------|--------|---------|--------|---------|--------|-------|--------|
| ! 1992 | ! 110.4! | ! 87.6!  | ! 71.2!  | ! 60.0!  | 54      | ! 57.4 | ! 37.2! | ! 19.3 | ! 13.1! | ! 6.6! | ! 3.3 | ! 1.6! |
| ! 1991 | ! 78.0!  | ! 45.0!  | ! 31.2!  | ! 27.0!  | 21.1    | ! 20.6 | ! 12.2! | ! 7.6  | ! 5.3!  | ! 4.0! | ! 2.1 | ! 1.2! |
| ! 1990 | ! 120.0! | ! 105.6! | ! 105.2! | ! 91.5!  | 45.3    | ! 66.6 | ! 39.5! | ! 21.0 | ! 14.2! | ! 7.1! | ! 3.6 | ! 1.8! |
| ! 1989 | ! 78.0!  | ! 64.0!  | ! 64.0!  | ! 60.0!  | 46      | ! 46.0 | ! 29.0! | ! 16.0 | ! 10.0! | ! 5.6! | ! 2.9 | ! 1.5! |
| ! 1987 | ! 84.0!  | ! 60.0!  | ! 60.0!  | ! 60.0!  | 48      | ! 56.0 | ! 33.2! | ! 16.6 | ! 11.9! | ! 5.9! | ! 3.7 | ! 2.0! |
| ! 1986 | ! 168.0! | ! 150.0! | ! 136.0! | ! 123.0! | 84      | ! 93.6 | ! 52.5! | ! 27.5 | ! 18.3! | ! 9.2! | ! 4.6 | ! 2.3! |
| ! 1985 | ! 72.0!  | ! 56.4!  | ! 54.0!  | ! 48.3!  | 37      | ! 38.6 | ! 21.3! | ! 11.2 | ! 7.4!  | ! 4.0! | ! 2.1 | ! 1.0! |
| ! 1984 | ! 68.4!  | ! 60.0!  | ! 51.0!  | ! 51.0!  | 41      | ! 41.0 | ! 27.1! | ! 13.8 | ! 9.2!  | ! 4.8! | ! 2.7 | ! 1.3! |
| ! 1983 | ! 84.0!  | ! 78.0!  | ! 64.0!  | ! 64.0!  | 65      | ! 64.0 | ! 38.8! | ! 20.7 | ! 13.8! | ! 7.1! | ! 3.5 | ! 1.8! |
| ! 1982 | ! 114.0! | ! 85.4!  | ! 60.0!  | ! 60.0!  | 50      | ! 49.0 | ! 30.9! | ! 18.8 | ! 12.5! | ! 6.3! | ! 3.1 | ! 1.6! |
| ! 1981 | ! 70.8!  | ! 54.0!  | ! 48.0!  | ! 43.5!  | 42      | ! 39.0 | ! 27.2! | ! 15.8 | ! 10.6! | ! 5.3! | ! 2.7 | ! 1.3! |
| ! 1980 | ! 138.0! | ! 126.0! | ! 108.0! | ! 93.0!  | 85      | ! 82.4 | ! 50.5! | ! 25.5 | ! 17.2! | ! 8.6! | ! 4.3 | ! 2.2! |
| ! 1979 | ! 72.0!  | ! 60.0!  | ! 56.0!  | ! 54.0!  | 42      | ! 42.6 | ! 22.6! | ! 12.6 | ! 8.6!  | ! 5.3! | ! 3.3 | ! 1.6! |
| ! 1978 | ! 72.0!  | ! 54.0!  | ! 46.0!  | ! 45.6!  | 36.6    | ! 40.0 | ! 28.8! | ! 16.1 | ! 11.5! | ! 4.4! | ! 3.0 | ! 1.5! |
| ! 1977 | ! 60.0!  | ! 45.0!  | ! 44.0!  | ! 36.0!  | 28      | ! 35.2 | ! 19.3! | ! 11.2 | ! 8.2!  | ! 5.0! | ! 2.7 | ! 1.9! |
| ! 1976 | ! 108.0! | ! 90.0!  | ! 88.0!  | ! 81.3!  |         | ! 58.0 | ! 32.0! | ! 26.1 | ! 11.6! | ! 6.3! | ! 3.4 | ! 1.7! |
| ! 1975 | ! 114.0! | ! 79.2!  | ! 64.0!  | ! 56.4!  |         | ! 56.0 | ! 39.0! | ! 21.2 | ! 14.1! | ! 7.1! | ! 3.5 | ! 1.8! |
| ! 1974 | ! 84.0!  | ! 72.0!  | ! 72.0!  | ! 60.0!  |         | ! 49.0 | ! 27.1! | ! 13.6 | ! 9.0!  | ! 4.6! | ! 2.5 | ! 1.5! |
| ! 1973 | ! 132.0! | ! 108.0! | ! 96.0!  | ! 93.0!  |         | ! 70.0 | ! 40.0! | ! 20.5 | ! 13.6! | ! 6.8! | ! 3.4 | ! 1.7! |
| ! 1972 | ! 42.0!  | ! 33.0!  | ! 25.2!  | ! 19.5!  |         | ! 16.5 | ! 16.0! | ! 11.9 | ! 8.5!  | ! 4.9! | ! 3.0 | ! 2.0! |
| ! 1971 | ! 30.0!  | ! 26.4!  | ! 22.0!  | ! 21.0!  |         | ! 19.6 | ! 10.8! | ! 6.5  | ! 4.5!  | ! 3.0! | ! 2.3 | ! 1.4! |
| ! 1970 | ! 96.0!  | ! 96.0!  | ! 82.8!  | ! 72.0!  |         | ! 53.0 | ! 28.1! | ! 14.3 | ! 9.6!  | ! 4.9! | ! 2.9 | ! 1.5! |
| ! 1969 | ! 114.0! | ! 84.0!  | ! 82.0!  | ! 69.0!  |         | ! 51.0 | ! 30.7! | ! 17.5 | ! 13.0! | ! 6.9! | ! 3.8 | ! 1.9! |
| ! 1968 | ! 84.0!  | ! 60.0!  | ! 60.0!  | ! 60.0!  |         | ! 54.0 | ! 33.0! | ! 17.0 | ! 11.4! | ! 5.7! | ! 2.8 | ! 1.4! |
| ! 1967 | ! 60.0!  | ! 60.0!  | ! 52.5!  | ! 52.5!  |         | ! 42.0 | ! 27.5! | ! 14.3 | ! 9.5!  | ! 4.8! | ! 2.4 | ! 1.2! |
| ! 1966 | ! 60.0!  | ! 54.0!  | ! 48.0!  | ! 45.0!  |         | ! 41.0 | ! 26.7! | ! 13.4 | ! 9.7!  | ! 4.9! | ! 2.4 | ! 1.2! |
| ! 1965 | ! 90.0!  | ! 90.0!  | ! 90.0!  | ! 90.0!  |         | ! 61.4 | ! 33.8! | ! 17.3 | ! 11.5! | ! 5.8! | ! 2.9 | ! 1.4! |
| ! 1964 | ! 48.0!  | ! 48.0!  | ! 38.0!  | ! 33.6!  |         | ! 27.4 | ! 23.1! | ! 12.4 | ! 9.6!  | ! 5.2! | ! 2.7 | ! 1.3! |
| ! 1963 | ! 120.0! | ! 96.0!  | ! 78.0!  | ! 69.0!  |         | ! 52.4 | ! 36.2! | ! 18.1 | ! 12.1! | ! 6.0! | ! 3.0 | ! 1.5! |
| ! 1962 | ! 72.0!  | ! 69.0!  | ! 68.0!  | ! 60.0!  |         | ! 50.4 | ! 30.5! | ! 16.5 | ! 11.3! | ! 5.6! | ! 3.6 | ! 1.8! |
| ! 1961 | ! 60.0!  | ! 52.2!  | ! 52.0!  | ! 49.8!  |         | ! 48.0 | ! 40.0! | ! 21.6 | ! 15.3! | ! 8.2! | ! 4.1 | ! 2.0! |
| ! 1960 | ! 84.0!  | ! 64.2!  | ! 48.0!  | ! 40.5!  |         | ! 30.0 | ! 19.0! | ! 11.0 | ! 7.3!  | ! 3.7! | ! 2.0 | ! 1.0! |
| ! 1959 | ! 84.0!  | ! 66.0!  | ! 54.0!  | ! 48.0!  |         | ! 42.0 | ! 24.0! | ! 12.0 | ! 8.4!  | ! 4.9! | ! 2.4 | ! 1.2! |
| ! 1958 | ! 39.6!  | ! 39.6!  | ! 34.0!  | ! 32.4!  |         | ! 25.6 | ! 14.1! | ! 8.8  | ! 7.3!  | ! 4.6! | ! 2.6 | ! 1.4! |
| ! 1957 | ! 84.0!  | ! 72.0!  | ! 72.0!  | ! 60.0!  |         | ! 49.2 | ! 26.5! | ! 13.3 | ! 8.8!  | ! 5.2! | ! 3.0 | ! 1.5! |
| ! 1956 | ! 90.0!  | ! 84.0!  | ! 65.6!  | ! 52.5!  |         | ! 40.4 | ! 28.0! | ! 18.0 | ! 12.2! | ! 6.1! | ! 3.3 | ! 1.7! |
| ! 1955 | ! 48.0!  | ! 48.0!  | ! 43.2!  | ! 36.0!  |         | ! 28.0 | ! 18.0! | ! 10.4 | ! 8.4!  | ! 4.4! | ! 2.4 | ! 1.4! |
| ! 1954 | ! 72.0!  | ! 72.0!  | ! 62.0!  | ! 60.0!  |         | ! 60.0 | ! 39.2! | ! 20.2 | ! 13.7! | ! 7.2! | ! 4.0 | ! 2.0! |
| ! 1953 | ! 66.0!  | ! 66.0!  | ! 60.0!  | ! 60.0!  |         | ! 60.0 | ! 39.0! | ! 20.0 | ! 13.6! | ! 7.7! | ! 4.1 | ! 2.2! |
| ! 1952 | ! 48.0!  | ! 42.0!  | ! 38.0!  | ! 31.8!  |         | ! 27.4 | ! 22.1! | ! 12.0 | ! 8.9!  | ! 4.6! | ! 2.7 | ! 1.6! |
| ! 1951 | ! 24.0!  | ! 18.0!  | ! 16.0!  | ! 16.0!  |         | ! 16.0 | ! 8.7!  | ! 6.7  | ! 5.5!  | ! 4.6! | ! 4.0 | ! 1.7! |
| ! 1950 | ! 72.0!  | ! 48.0!  | ! 48.0!  | ! 42.0!  |         | ! 34.0 | ! 22.0! | ! 14.3 | ! 10.9! | ! 6.9! | ! 3.4 | ! 1.7! |
| ! 1949 | ! 72.0!  | ! 72.0!  | ! 72.0!  | ! 69.0!  |         | ! 49.0 | ! 24.7! | ! 12.5 | ! 8.3!  | ! 4.5! | ! 2.5 | ! 1.2! |
| ! 1948 | ! 120.0! | ! 102.0! | ! 84.0!  | ! 75.0!  |         | ! 60.0 | ! 31.8! | ! 16.5 | ! 11.0! | ! 5.6! | ! 2.8 | ! 1.4! |
| ! 1947 | ! 72.0!  | ! 72.0!  | ! 72.0!  | ! 72.0!  |         | ! 64.0 | ! 33.2! | ! 17.6 | ! 11.8! | ! 5.9! | ! 2.9 | ! 1.5! |

INTENSIDADES MAXIMAS PARA DIFERENTES DURACIONES (mm/h)  
ESTACION: QUITO-OBSERVATORIO

| ! ano !  | ! 5min !  | ! 10min ! | ! 15min ! | ! 20min ! | ! 30min ! | ! 1h !   | ! 2h !   | ! 3h !   | ! 6h !  | ! 12h ! | ! 24h ! |
|----------|-----------|-----------|-----------|-----------|-----------|----------|----------|----------|---------|---------|---------|
| ! 1946 ! | ! 114.0 ! | ! 84.0 !  | ! 68.0 !  | ! 60.0 !  | ! 47.0 !  | ! 24.4 ! | ! 13.3 ! | ! 9.0 !  | ! 4.5 ! | ! 2.3 ! | ! 1.2 ! |
| ! 1945 ! | ! 120.0 ! | ! 69.0 !  | ! 58.0 !  | ! 58.0 !  | ! 39.8 !  | ! 20.5 ! | ! 10.3 ! | ! 7.3 !  | ! 3.7 ! | ! 2.0 ! | ! 1.7 ! |
| ! 1944 ! | ! 54.0 !  | ! 48.0 !  | ! 36.0 !  | ! 30.0 !  | ! 29.0 !  | ! 18.2 ! | ! 9.6 !  | ! 7.2 !  | ! 4.7 ! | ! 2.7 ! | ! 1.3 ! |
| ! 1943 ! | ! 72.0 !  | ! 72.0 !  | ! 72.0 !  | ! 66.0 !  | ! 50.0 !  | ! 32.0 ! | ! 16.3 ! | ! 10.9 ! | ! 5.4 ! | ! 3.0 ! | ! 1.5 ! |
| ! 1942 ! | ! 108.0 ! | ! 72.0 !  | ! 60.0 !  | ! 58.5 !  | ! 47.4 !  | ! 26.1 ! | ! 15.2 ! | ! 11.5 ! | ! 6.7 ! | ! 3.5 ! | ! 1.7 ! |
| ! 1941 ! | ! 108.0 ! | ! 84.0 !  | ! 80.0 !  | ! 69.0 !  | ! 49.0 !  | ! 31.2 ! | ! 16.5 ! | ! 11.1 ! | ! 6.2 ! | ! 3.8 ! | ! 2.0 ! |
| ! 1940 ! | ! 150.0 ! | ! 96.0 !  | ! 82.0 !  | ! 63.6 !  | ! 44.2 !  | ! 25.0 ! | ! 13.4 ! | ! 9.1 !  | ! 4.9 ! | ! 2.6 ! | ! 1.3 ! |
| ! 1939 ! | ! 84.0 !  | ! 72.0 !  | ! 72.0 !  | ! 60.0 !  | ! 45.6 !  | ! 29.5 ! | ! 15.3 ! | ! 10.7 ! | ! 5.4 ! | ! 2.7 ! | ! 1.4 ! |
| ! 1938 ! | ! 72.0 !  | ! 54.0 !  | ! 42.0 !  | ! 33.0 !  | ! 27.0 !  | ! 20.0 ! | ! 12.7 ! | ! 9.0 !  | ! 5.1 ! | ! 3.8 ! | ! 2.0 ! |
| ! 1937 ! | ! 96.0 !  | ! 84.0 !  | ! 70.0 !  | ! 60.0 !  | ! 44.0 !  | ! 25.7 ! | ! 15.0 ! | ! 10.0 ! | ! 5.5 ! | ! 2.8 ! | ! 1.6 ! |
| ! 1936 ! | ! 132.0 ! | ! 120.0 ! | ! 112.0 ! | ! 90.0 !  | ! 62.6 !  | ! 31.5 ! | ! 16.0 ! | ! 10.7 ! | ! 5.3 ! | ! 2.7 ! | ! 1.3 ! |
| ! 1935 ! | ! 84.0 !  | ! 54.0 !  | ! 48.0 !  | ! 42.0 !  | ! 29.0 !  | ! 19.2 ! | ! 10.8 ! | ! 7.5 !  | ! 4.2 ! | ! 2.5 ! | ! 1.4 ! |
| ! 1934 ! | ! 96.0 !  | ! 60.0 !  | ! 50.0 !  | ! 42.0 !  | ! 38.0 !  | ! 26.0 ! | ! 18.5 ! | ! 14.3 ! | ! 8.3 ! | ! 4.1 ! | ! 2.1 ! |
| ! 1933 ! | ! 60.0 !  | ! 60.0 !  | ! 52.0 !  | ! 45.0 !  | ! 34.0 !  | ! 25.0 ! | ! 15.0 ! | ! 10.5 ! | ! 5.2 ! | ! 3.2 ! | ! 2.4 ! |
| ! 1932 ! | ! 120.0 ! | ! 120.0 ! | ! 100.0 ! | ! 77.4 !  | ! 51.6 !  | ! 25.8 ! | ! 12.9 ! | ! 9.0 !  | ! 5.6 ! | ! 2.8 ! | ! 1.4 ! |
| ! 1931 ! | ! 120.0 ! | ! 78.0 !  | ! 64.0 !  | ! 55.5 !  | ! 39.0 !  | ! 25.0 ! | ! 15.5 ! | ! 10.5 ! | ! 5.3 ! | ! 2.8 ! | ! 1.6 ! |
| ! 1930 ! | ! 36.0 !  | ! 30.0 !  | ! 28.0 !  | ! 24.0 !  | ! 22.0 !  | ! 16.0 ! | ! 11.8 ! | ! 8.0 !  | ! 4.4 ! | ! 2.5 ! | ! 1.3 ! |
| ! 1929 ! | ! 66.0 !  | ! 45.0 !  | ! 40.0 !  | ! 34.5 !  | ! 24.8 !  | ! 17.6 ! | ! 11.0 ! | ! 7.8 !  | ! 4.4 ! | ! 2.7 ! | ! 1.4 ! |
| ! 1928 ! | ! 0.0 !   | ! 0.0 !   | ! 0.0 !   | ! 0.0 !   | ! 38.0 !  | ! 38.0 ! | ! 20.0 ! | ! 13.3 ! | ! 6.7 ! | ! 3.6 ! | ! 2.0 ! |
| ! 1927 ! | ! 0.0 !   | ! 0.0 !   | ! 0.0 !   | ! 0.0 !   | ! 20.0 !  | ! 13.0 ! | ! 7.8 !  | ! 5.7 !  | ! 3.5 ! | ! 2.3 ! | ! 1.3 ! |
| ! 1926 ! | ! 0.0 !   | ! 0.0 !   | ! 0.0 !   | ! 0.0 !   | ! 24.0 !  | ! 24.0 ! | ! 13.7 ! | ! 9.5 !  | ! 4.7 ! | ! 3.1 ! | ! 1.7 ! |
| ! 1924 ! | ! 0.0 !   | ! 0.0 !   | ! 0.0 !   | ! 0.0 !   | ! 18.2 !  | ! 12.5 ! | ! 10.0 ! | ! 7.1 !  | ! 3.6 ! | ! 3.6 ! | ! 1.2 ! |
| ! 1921 ! | ! 0.0 !   | ! 0.0 !   | ! 0.0 !   | ! 0.0 !   | ! 17.5 !  | ! 16.9 ! | ! 9.0 !  | ! 6.3 !  | ! 4.8 ! | ! 2.4 ! | ! 1.2 ! |
| ! 1920 ! | ! 0.0 !   | ! 0.0 !   | ! 0.0 !   | ! 0.0 !   | ! 32.4 !  | ! 16.2 ! | ! 8.1 !  | ! 5.7 !  | ! 2.8 ! | ! 1.9 ! | ! 0.9 ! |
| ! 1919 ! | ! 0.0 !   | ! 0.0 !   | ! 0.0 !   | ! 0.0 !   | ! 31.4 !  | ! 20.0 ! | ! 16.1 ! | ! 10.7 ! | ! 5.4 ! | ! 2.7 ! | ! 1.3 ! |
| ! 1918 ! | ! 0.0 !   | ! 0.0 !   | ! 0.0 !   | ! 0.0 !   | ! 46.0 !  | ! 24.0 ! | ! 12.8 ! | ! 8.5 !  | ! 4.6 ! | ! 2.8 ! | ! 1.5 ! |
| ! 1917 ! | ! 0.0 !   | ! 0.0 !   | ! 0.0 !   | ! 0.0 !   | ! 34.0 !  | ! 26.0 ! | ! 13.5 ! | ! 9.0 !  | ! 4.8 ! | ! 4.0 ! | ! 2.0 ! |
| ! 1916 ! | ! 0.0 !   | ! 0.0 !   | ! 0.0 !   | ! 0.0 !   | ! 20.0 !  | ! 20.0 ! | ! 16.5 ! | ! 11.4 ! | ! 5.8 ! | ! 2.9 ! | ! 1.4 ! |

**A N E X O      N° 3**

'IDIONA: QBASIC.

'PENTH

REVISION Y ALMACENAMIENTO DE FORMA DE LA CURVA DE TORMENTAS

'REALIZADO POR:FRANKLIN BELTRAN

- En el interior del programa TESIS.BAS, se genera una division de archivos segun la duracion del evento de acuerdo a:

#####

WIDTH LPRINT 90

CLS

```
PRINT : PRINT : PRINT : PRINT
```

[illegible]

IF A\$ = "R" OR A\$ = "r" THEN

LOCATE 10, 1

PRINT "QUE ARCHIVO SE UTILIZARA PARA LA INVESTIGACION?"

PRINT #1 ENH

```
PRINT "*****"
```

INPUT ARCHIVE

GOTO 5

END IF

ELSE

ELSE  
GOTO 1

END IF

```

CLS
PRINT "!!!!!!!!!!!!!!!!!!!!!!!!!!!!!!!!!!!!!!!!!!!!!!!"
PRINT "1          INTENSIDADES          1"
PRINT "1          NNNNNNNNNNNNNN        1"
PRINT "1 INGRESO DE DATOS      I            1"
PRINT "1          FORMA DE LA CURVA         1"
PRINT "1          NNNNNNNNNNNNNNNNNNNN     1"
PRINT "1 INGRESO DE DATOS      N            1"
PRINT "!!!!!!!!!!!!!!!!!!!!!!!!!!!!!!!!!!!!!!!!!!!!!!!"
INPUT " QUE TIPO DE INGRESO DESEA REALIZAR "; A$
IF A$ = "I" OR A$ = "N" OR A$ = "i" OR A$ = "n" THEN
IF A$ = "N" OR A$ = "n" THEN 4
ELSE
GOTO 2
END IF
3 CLS
INPUT "AÑO="; I(1)
INPUT "MES="; I(2)
INPUT "DÍA="; I(3)
INPUT "DURACION="; I(4)
INPUT "I(5m)="; I(5)
INPUT "I(10m)="; I(6)
INPUT "I(15m)="; I(7)
INPUT "I(20m)="; I(8)
INPUT "I(30m)="; I(9)
INPUT "I(60m)="; I(10)
INPUT "I(2h)="; I(11)
INPUT "I(3h)="; I(12)
INPUT "I(6h)="; I(13)
INPUT "I(12h)="; I(14)
INPUT "I(24h)="; I(15)
INPUT "TODOS LOS DATOS ESTAN CORRECTOS (S/N)"; A$
IF A$ = "S" THEN
OPEN "C:TESIS" FOR APPEND AS #1
FOR I = 1 TO 14
PRINT #1, I(I),
NEXT I
PRINT #1, I(15)
CLOSE #1
ELSE
GOTO 3
END IF
INPUT "DESEA INGRESAR MAS DATOS (S/N) "; A$
IF A$ = "S" THEN 3
GOTO 1
4 CLS
INPUT "INGRESE :AÑO,MES,DIA ", P(1), P(2), P(3)
INPUT "INGRESE EL NUMERO DE PUNTOS "; P(5)
PRINT "INGRESO DEL TIEMPO EN HORAS,MINUTOS"
FOR I = 1 TO P(5)
INPUT "HORA,MINUTO"; H, M
INPUT "ALTURA(m)="; A(5 + I)
P(5 + I) = H + (M / 60)
NEXT I
P(4) = (P(5 + P(5)) - P(6)) * 60
PRINT " DUR="; P(4)
INPUT "TODOS LOS DATOS ESTAN CORRECTOS (S/N)"; C$
IF C$ = "S" THEN
' EN EL CASO DE INGRESAR QUITO OBSERVATORIO, USE "F"
' EN EL CASO DE INGRESAR IZORAMBA USE "I"

```

```

EN EL CASO DE INGRESAR IZAQUITO USE "N"
' EN EL CASO DE INGRESAR TOLA USE 'T'
' EN EL CASO DE INGRESAR AEROPUERTO USE 'D'
'OPEN "C:T" FOR APPEND AS #2
'OPEN "C:N" FOR APPEND AS #2
'OPEN "C:I" FOR APPEND AS #2
'OPEN "C:D" FOR APPEND AS #2
OPEN "C:F" FOR APPEND AS #2
FOR I = 1 TO 5
PRINT #2, P(I),
NEXT I
FOR I = 6 TO 5 + P(5)
PRINT #2, P(I), A(I)
NEXT I
CLOSE #2
ELSE
GOTO 4
D IF
PUT "DESEA INGRESAR MAS DATOS (S/N) "; B$
B$ = "S" THEN 4
TO 1

```

```
CLS  
PRINT "!!!!!!!!!!!!!!!!!!!!!!!!!!!!!!!!!!!!!!!!!!!!"  
PRINT "1 INTENSIDADES: I"  
PRINT "1 NNNNNNNNNNNN I"  
PRINT "1 REVISION DE DATOS D I"  
PRINT "1 I"  
PRINT "1 FORMA DE LA CURVA: I"  
PRINT "1 NNNNNNNNNNNNNN I"  
PRINT "1 REVISION DE DATOS E I"  
PRINT "1 I"  
PRINT "1 CALCULO GENERAL: I"  
PRINT "1 NNNNNNNNNNNNNN I"  
PRINT "1 UTILITARIOS U I"  
PRINT "1 HIETOGRAMAS GENERALES G I"  
PRINT "1 HIETOGRAMAS SEGUN CUARTIL C I"  
PRINT "!!!!!!!!!!!!!!!!!!!!!!!!!!!!!!!!!!!!!!!!!!!!"  
INPUT "QUE TIPO DE TRABAJO DESEA REALIZAR : "; A$  
IF A$ = "D" OR A$ = "E" OR A$ = "U" OR A$ = "G" OR A$ = "C" THEN  
IF A$ = "U" THEN 12  
IF A$ = "E" THEN 7  
IF A$ = "G" THEN 14  
IF A$ = "C" THEN 19  
ELSE  
GOTO 5  
END IF
```

```
6 PRINT "!!!!!!!!!!!!!!!!!!!!!!!!!!!!!!!!!!!!!!!!!!!!!!!"
PRINT "1 REGISTROS TOTALES          T          1"
PRINT "1 REGISTRO ANUAL              A          1"
PRINT "!!!!!!!!!!!!!!!!!!!!!!!!!!!!!!!!!!!!!!!!!!!!!!!"
INPUT "INGRESE EL TIPO DE REGISTRO "; C$
IF C$ = "T" OR C$ = "A" THEN
ELSE
GOTO 6
END IF
IF C$ = "A" THEN INPUT "QUE AÑO DESEA "; A1
PRINT "Zoooooooooooooooooooooooooooooooooooooooooooooooooooooooooooooooooooooooooooo?"
PRINT "3 FECHA      3      3                      INTENSIDADES (mm/h)                                3"
PRINT "3 A      M D30UR 3 5 3 10 3 15 3 20 3 30 360 3120 3180 3 6h 312h 324h 3"
```



[illegible]

```

END IF
GOTO 29
INPUT "DESEA REGRESAR AL MENU PRINCIPAL (S/N)"; A$
IF A$ = "S" THEN 1
IF A$ <> "S" THEN END
7 KK = 0
AR = 0
8 OPEN "C:" + ARCHI$ FOR INPUT AS #2
CLS
IF D$ = "P" OR D$ = "p" THEN 9
INPUT "QUE TORMENTA NECESITA (FECHA)"; A1, M1, D1
9 DO WHILE NOT EOF(2)
INPUT #2, A, M, D, DU, N
FOR I = 6 TO 5 + N
INPUT #2, A(I), P(I)
NEXT I
IF A1 = A AND M1 = M AND D1 = D THEN
KK = 1
CLS
SCREEN 12
PRINT "!!!!!!!!!!!!!!!!!!!!PLUVIOGRAMA OBSERVADO!!!!!!!!!!!!!!!!!!!!!!!!!"
PRINT "AZD MES DIA DURACION"
PRINT USING "#### ### ## ####"; A; M; D; DU
PRINT "HORA ALTURA(##)"
FOR I = 6 TO 5 + N
PRINT USING "##.### ##.##"; A(I); P(I)
NEXT I
GOSUB 15
'LOCATE 21, 1
'PRINT "!!!!!!!!!!!!!!!!!!!!!!!!!!!!!!!!!!!!!!!!!!!!!!!!!!!!!!!!!!!!!!!!!!!!!!!!!"
D$ = "-"
DO UNTIL D$ = "N" OR D$ = "S" OR D$ = "n" OR D$ = "s"
LOCATE 25, 25
PRINT "DESEA IR AL ANALISIS ADIMENSIONAL N"
LOCATE 26, 25
PRINT "DESEA IR AL MENU PRINCIPAL S"
INPUT D$
LOOP
IF D$ = "S" OR D$ = "s" THEN
CLOSE #2: GOTO 1
END IF
IF D$ = "N" OR D$ = "n" THEN
XX = A(6): YY = P(6)
FOR I = 6 TO 5 + N
A(I) = (A(I) - XX) / (A(5 + N) - XX): P(I) = (P(I) - YY) / (P(5 + N) - YY)
NEXT I
CLS
SCREEN 12
PRINT "!!!!!!!!!!!!!!!!!!!!ANALISIS ADIMENSIONAL!!!!!!!!!!!!!!!!!!!!!!!!!"
PRINT "AZD MES DIA DURACION"
PRINT USING "#### ### ## ####"; A; M; D; DU
PRINT "HORA ALTURA "
FOR I = 6 TO 5 + N
PRINT USING "##.### ##.## "; A(I); P(I)
NEXT I
GOSUB 16
LOCATE 21, 1
PRINT "!!!!!!!!!!!!!!!!!!!!!!!!!!!!!!!!!!!!!!!!!!!!!!!!!!!!!!!!!!!!!!!!!!!!!!!!!"
D$ = "-"
DO UNTIL D$ = "P" OR D$ = "H" OR D$ = "p" OR D$ = "h"

```

13

```

PRINT " 3FINT-2          500 <= D < 780          3"
PRINT " 3FINT-3          D < 500                  3"
PRINT " 3OK!!          3"
PRINT " @@@@@@@@@@@@@@@@@@@@@@@@@@@@@@@@@@@@@@@@@@@@@@@@@@@@@@@@@@@@@"
OPEN "C:" + ARCHI$ FOR INPUT AS #1
OPEN "C:FINT-1" FOR OUTPUT AS #2
OPEN "C:FINT-2" FOR OUTPUT AS #3
OPEN "C:FINT-3" FOR OUTPUT AS #4
DO WHILE NOT EOF(1)
INPUT #1, A, M, D, DU, N
FOR I = 1 TO N
    INPUT #1, A(I), P(I)
NEXT I
DU = INT((A(N) - A(1)) * 60)
IF DU >= 780 THEN
    PRINT #2, USING " #####    ##    ##    #####"; A; M; D; DU; N
    IF N <> 0 THEN
        FOR I = 1 TO N
            PRINT #2, A(I), P(I)
        NEXT I
    ELSE
        END IF
    ELSE
        END IF
    IF DU < 780 AND DU >= 500 THEN
        PRINT #3, USING " #####    ##    ##    #####"; A; M; D; DU; N
        IF N <> 0 THEN
            FOR I = 1 TO N
                PRINT #3, A(I), P(I)
            NEXT I
        ELSE
            END IF
        ELSE
            END IF
        IF DU < 500 THEN
            PRINT #4, USING " #####    ##    ##    #####"; A; M; D; DU; N
            IF N <> 0 THEN
                FOR I = 1 TO N
                    PRINT #4, A(I), P(I)
                NEXT I
            ELSE
                END IF
            ELSE
                END IF
            LOOP
            CLOSE #1: CLOSE #2: CLOSE #3: CLOSE #4
            INPUT " DESEA REGRESAR A UTILITARIOS (S/N) "; AR$
            IF AR$ = "S" OR AR$ = "s" THEN
                GOTO 12
            ELSE
                END
            END IF
        END
    END

```

14 'SUBPROGRAMA PARA CALCULO DE TODOS LOS HIETOGRAMAS SEGUN SU DIVISION

[illegible]

```

INPUT " INGRESE EL ARCHIVO DE DATOS POR REVISAR"; V$
OPEN "C:FINT-" + V$ FOR INPUT AS #6
AA = ASC(V$) - 48
CLS
SCREEN 12
PRINT " EN ESTE MOMENTO SE ESTA CREANDO EL ARCHIVO TESFREC"; AA
PRINT " UN MOMENTO POR FAVOR"
OPEN "C:TESFREC" + V$ FOR OUTPUT AS #AA
' SE OBTIENE DATOS NORMALES
PRINT #AA, "  AÑO  MES   DÍA  DUR   JJ"
A1 = 0: A2 = 0: A3 = 0: a4 = 0
'IMPRESIONES QUE NO ENTRAN EN EL WHILE
GOSUB 25
'INICIO DE BUSQUEDA EN TESDEPUR DEL CUARTIL EN EL QUE CADA EVENTO
'LA PRECIPITACION ES MAXIMA Y CREACION DE ARCHIVOS CUARTIL#
DO WHILE NOT EOF(6)
INPUT #6, A, M, D, DU, N
PRINT #AA, A, M, D, DU, JJ
FOR I = 6 TO 5 + N
INPUT #6, A(I), P(I)
A1(I) = A(I)
P1(I) = P(I)
NEXT I
GOSUB 26
' EN ESTE MOMENTO SE CREAN LOS ARCHIVOS TESFREC#
' EN ADELANTE SE CREAN LOS ARCHIVOS CUARTIL#
IF JJ = 1 THEN
A1 = A1 + 1
OPEN "C:CUARTIL1" FOR APPEND AS #7
PRINT #7, A, M, D, N, DU, JJ
FOR I = 6 TO 5 + N
PRINT #7, A1(I), P1(I)
NEXT I
CLOSE #7
ELSE
END IF
IF JJ = 2 THEN
A2 = A2 + 1
OPEN "C:CUARTIL2" FOR APPEND AS #8
PRINT #8, A, M, D, N, DU, JJ
FOR I = 6 TO 5 + N
PRINT #8, A1(I), P1(I)
NEXT I
CLOSE #8
ELSE
END IF
IF JJ = 3 THEN
A3 = A3 + 1
OPEN "C:CUARTIL3" FOR APPEND AS #9
PRINT #9, A, M, D, N, DU, JJ
FOR I = 6 TO 5 + N
PRINT #9, A1(I), P1(I)
NEXT I
CLOSE #9
ELSE
END IF
IF JJ = 4 THEN
a4 = a4 + 1
OPEN "C:CUARTIL4" FOR APPEND AS #10
PRINT #10, A, M, D, N, DU, JJ

```

```

FOR I = 6 TO 5 + N
PRINT #10, A1(I), P1(I)
NEXT I
CLOSE #10
ELSE
END IF
'-----
GOSUB 27
LOOP
LOCATE 5, 1
PRINT " REPORTE"
PRINT " PRIMER CUARTIL      "; A1
PRINT " SEGUNDO CUARTIL     "; A2
PRINT " TERCER CUARTIL      "; A3
PRINT " CUARTO CUARTIL      "; A4
CLOSE #6
CLOSE #AA
LOCATE 23, 1
INPUT " DESEA HIETOGRAMAS DE OTRO ARCHIVO (S/N)*; A$
IF A$ = "S" OR A$ = "s" THEN
GOTO 14
ELSE
GOTO 12
END IF
END
15 'SUBROUTINA GRAFICOS
'EL PUNTO CENTRAL TIENE COORDENADAS (250,280)
'COEF DE CORE HORI= (80/10)=8
'COEF DE CORE VERT= (48/10)=4.8
LOCATE 12, 21
PRINT "P(##)"
FOR I = 0 TO 4
LINE (250 + 80 * I, 35)-(250 + 80 * I, 285)
NEXT I
FOR I = 0 TO 5
LINE (245, 280 - 48 * I)-(540, 280 - 48 * I)
NEXT I
P(5) = 0: A(5) = 0
COLOR 4
FOR I = 6 TO 5 + N
LINE (250 + A(I - 1) * 8, 280 - P(I - 1) * 4.8)-(250 + A(I) * 8, 280 - P(I) * 4.8)
NEXT I
COLOR 7
LOCATE 23, 40: PRINT " TIEMPO ( horas)"
LOCATE 19, 28: PRINT "      0          10          20          30          40 "
LOCATE 3, 28: PRINT "50": LOCATE 6, 28: PRINT "40"
LOCATE 9, 28: PRINT "30": LOCATE 12, 28: PRINT "20"
LOCATE 15, 28: PRINT "10"
RETURN
16 'SUBROUTINA GRAFICOS ADIMENSIONALES
'VERTICALES
FOR I = 0 TO 10
LINE (250 + 28 * I, 35)-(250 + 28 * I, 285)
NEXT I
'HORIZONTALES
FOR I = 0 TO 10
LINE (245, 280 - 24 * I)-(540, 280 - 24 * I)
NEXT I
P(5) = 0: A(5) = 0
COLOR 4

```

17  
18

```

IF D$ = "S" OR D$ = "s" THEN 10
IF D$ = "N" OR D$ = "n" THEN
CLOSE #2
END
END IF
RETURN
END
19 CLS
'SUBROUTINA PARA GRAFICOS DE ARCHIVOS CUARTIL
INPUT "QUE CUARTIL NECESITA REVISAR ="; A$
SCREEN 12
PRINT " EN ESTE MOMENTO SE GRAFICA LOS HIETOGRAMAS DE TODAS LAS"
PRINT " TORMENTAS CON CANTIDAD DE LLUVIA MAXIMA EN EL CUARTIL"; A$
AA = ASC(A$) - 48
OPEN "C:CUARTIL" + A$ FOR INPUT AS #AA
GOSUB 25
NEV = 0
DO WHILE NOT EOF(AA)
INPUT #AA, A, M, D, N, DUR, JJ
FOR I = 6 TO 5 + N
INPUT #AA, A(I), P(I)
NEXT I
NEV = NEV + 1
GOSUB 26
GOSUB 27
LOOP
CLOSE #AA
LOCATE 10, 1
PRINT " # DE EVENTOS="; NEV
LOCATE 23, 1
INPUT " DESEA HIETOGRAMAS DE OTRO ARCHIVO (S/N)"; A$
IF A$ = "S" THEN
GOTO 19
ELSE
GOTO 12
END IF
END
25 LOCATE 9, 31
PRINT "P(mm)"
LOCATE 10, 33: PRINT "1"
LINE (295, 250)-(580, 250)
LINE (300, 130)-(300, 255)
FOR I = 1 TO 4
LINE (300 + 50 * I, 255)-(300 + 50 * I, 245)
NEXT I
FOR I = 1 TO 5
LINE (295, 250 - 20 * I)-(305, 250 - 20 * I)
NEXT I
LOCATE 18, 30
PRINT "      0   .25   .50   .75   1"
RETURN
26 ' TRANSFORMACION A DATOS ADIMENSIONALES
XX = A(6): YY = P(6)
FOR I = 6 TO 5 + N
A(I) = (A(I) - XX) / (A(5 + N) - XX)
P(I) = (P(I) - YY) / (P(5 + N) - YY)
NEXT I
FOR I = 6 TO 5 + N
A(I - 5) = A(I)
P(I - 5) = P(I)

```



```

NEXT I
SCREEN 12
'SUBPROGRAMA DE INTERPOLACION DE DATOS
MAX = 0: J1 = 0
FOR J = 1 TO 4
FOR K = 1 TO N - 1
Y1 = J / 4
IF Y1 > A(K) AND Y1 <= A(K + 1) THEN
PU(J) = P(K) + (Y1 - A(K)) * (P(K + 1) - P(K)) / (A(K + 1) - A(K))
DPU(J) = PU(J) - PU(J - 1)
IF DPU(J) >= MAX THEN
MAX = DPU(J)
JJ = J
J1 = J1 + 1
IF J1 = 4 THEN JJ = 0
ELSE
END IF
ELSE
END IF
NEXT K
NEXT J
RETURN
27 'GRAFICOS DE HIETOGRAMAS EN GENERAL
FOR I = 1 TO 4
LINE (300 + 50 * (I - 1), 250 - DPU(I) * 100)-(300 + 50 * (I - 1), 250)
LINE (300 + 50 * (I - 1), 250 - DPU(I) * 100)-(300 + 50 * I, 250 - DPU(I) * 100)
LINE (300 + 50 * I, 250 - DPU(I) * 100)-(300 + 50 * I, 250)
NEXT I
RETURN

SUB as2 (N, A!(), Y!(), xp!, yp!)
DIM l(N), M(N), R(N), s(N)
62 : D = A(2) - A(1): e = (Y(2) - Y(1)) / D
72 : FOR K = 2 TO N - 1
H = D: D = A(K + 1) - A(K)
82 : F = e: e = (Y(K + 1) - Y(K)) / D
l(K) = D / (D + H)
92 : R(K) = 1 - l(K): s(K) = 6 * (e - F) / (H + D)
NEXT K

102 : FOR K = 2 TO N - 1: P = 1 / (R(K) * l(K - 1) + 2): l(K) = -l(K) * P
112 : s(K) = (s(K) - R(K) * s(K - 1)) * P: NEXT K
122 : M(N) = 0: l(N - 1) = s(N - 1): M(N - 1) = l(N - 1)
132 : FOR K = N - 2 TO 1 STEP -1
142 : l(K) = l(K) * l(K + 1) + s(K): M(K) = l(K): NEXT K
162 : IF xp > A(N) THEN 232
172 : IF xp <= A(1) THEN 252
182 : I = I + 1: IF xp > A(I) THEN 182
192 : J = I - 1: D = A(I) - A(J): H = xp - A(J): R = A(I) - xp
202 : P = D * D / 6: yp = (M(J) * R ^ 3 + M(I) * H ^ 3) / 6 / D
212 : yp = yp + ((Y(J) - M(J) * P) * R + (Y(I) - M(I) * P) * H) / D
222 : GOTO 272
232 : D = A(N) - A(N - 1): yp = D * M(N - 1) / 6 + (Y(N) - Y(N - 1)) / D
242 : yp = yp * (xp - A(N)) + Y(N): GOTO 222
252 : D = A(2) - A(1): yp = -D * M(2) / 6 + (Y(2) - Y(1)) / D
262 : yp = yp * (xp - A(1)) + Y(1): GOTO 222
272 : END SUB

```

**A N E X O      N° 4**

Numero de Tormenta: 1

Tipo de Tormenta: 1

Fecha de Registro: 1991 11 25

|        |            | Hora de registro del punto indicado (h) |  |      |  | Velocidades de movimiento entre estaciones (m/s) |  |            |  |          |  |  |  |  |  |  |  |  |  |
|--------|------------|-----------------------------------------|--|------|--|--------------------------------------------------|--|------------|--|----------|--|--|--|--|--|--|--|--|--|
|        |            | Estacion                                |  |      |  |                                                  |  |            |  |          |  |  |  |  |  |  |  |  |  |
| Puntos | Quito Obs. | Izobamba                                |  | Tola |  | Chorrera                                         |  | Aeropuerto |  | Inaquito |  |  |  |  |  |  |  |  |  |
|        |            |                                         |  |      |  |                                                  |  |            |  |          |  |  |  |  |  |  |  |  |  |
|        |            |                                         |  |      |  |                                                  |  |            |  |          |  |  |  |  |  |  |  |  |  |
|        |            |                                         |  |      |  |                                                  |  |            |  |          |  |  |  |  |  |  |  |  |  |
|        |            |                                         |  |      |  |                                                  |  |            |  |          |  |  |  |  |  |  |  |  |  |
|        |            |                                         |  |      |  |                                                  |  |            |  |          |  |  |  |  |  |  |  |  |  |
|        |            |                                         |  |      |  |                                                  |  |            |  |          |  |  |  |  |  |  |  |  |  |
|        |            |                                         |  |      |  |                                                  |  |            |  |          |  |  |  |  |  |  |  |  |  |
|        |            |                                         |  |      |  |                                                  |  |            |  |          |  |  |  |  |  |  |  |  |  |
|        |            |                                         |  |      |  |                                                  |  |            |  |          |  |  |  |  |  |  |  |  |  |
|        |            |                                         |  |      |  |                                                  |  |            |  |          |  |  |  |  |  |  |  |  |  |
|        |            |                                         |  |      |  |                                                  |  |            |  |          |  |  |  |  |  |  |  |  |  |
|        |            |                                         |  |      |  |                                                  |  |            |  |          |  |  |  |  |  |  |  |  |  |
|        |            |                                         |  |      |  |                                                  |  |            |  |          |  |  |  |  |  |  |  |  |  |
|        |            |                                         |  |      |  |                                                  |  |            |  |          |  |  |  |  |  |  |  |  |  |
|        |            |                                         |  |      |  |                                                  |  |            |  |          |  |  |  |  |  |  |  |  |  |
|        |            |                                         |  |      |  |                                                  |  |            |  |          |  |  |  |  |  |  |  |  |  |
|        |            |                                         |  |      |  |                                                  |  |            |  |          |  |  |  |  |  |  |  |  |  |
|        |            |                                         |  |      |  |                                                  |  |            |  |          |  |  |  |  |  |  |  |  |  |
|        |            |                                         |  |      |  |                                                  |  |            |  |          |  |  |  |  |  |  |  |  |  |
|        |            |                                         |  |      |  |                                                  |  |            |  |          |  |  |  |  |  |  |  |  |  |
|        |            |                                         |  |      |  |                                                  |  |            |  |          |  |  |  |  |  |  |  |  |  |
|        |            |                                         |  |      |  |                                                  |  |            |  |          |  |  |  |  |  |  |  |  |  |
|        |            |                                         |  |      |  |                                                  |  |            |  |          |  |  |  |  |  |  |  |  |  |
|        |            |                                         |  |      |  |                                                  |  |            |  |          |  |  |  |  |  |  |  |  |  |
|        |            |                                         |  |      |  |                                                  |  |            |  |          |  |  |  |  |  |  |  |  |  |
|        |            |                                         |  |      |  |                                                  |  |            |  |          |  |  |  |  |  |  |  |  |  |
|        |            |                                         |  |      |  |                                                  |  |            |  |          |  |  |  |  |  |  |  |  |  |
|        |            |                                         |  |      |  |                                                  |  |            |  |          |  |  |  |  |  |  |  |  |  |
|        |            |                                         |  |      |  |                                                  |  |            |  |          |  |  |  |  |  |  |  |  |  |
|        |            |                                         |  |      |  |                                                  |  |            |  |          |  |  |  |  |  |  |  |  |  |
|        |            |                                         |  |      |  |                                                  |  |            |  |          |  |  |  |  |  |  |  |  |  |
|        |            |                                         |  |      |  |                                                  |  |            |  |          |  |  |  |  |  |  |  |  |  |
|        |            |                                         |  |      |  |                                                  |  |            |  |          |  |  |  |  |  |  |  |  |  |
|        |            |                                         |  |      |  |                                                  |  |            |  |          |  |  |  |  |  |  |  |  |  |
|        |            |                                         |  |      |  |                                                  |  |            |  |          |  |  |  |  |  |  |  |  |  |
|        |            |                                         |  |      |  |                                                  |  |            |  |          |  |  |  |  |  |  |  |  |  |
|        |            |                                         |  |      |  |                                                  |  |            |  |          |  |  |  |  |  |  |  |  |  |
|        |            |                                         |  |      |  |                                                  |  |            |  |          |  |  |  |  |  |  |  |  |  |
|        |            |                                         |  |      |  |                                                  |  |            |  |          |  |  |  |  |  |  |  |  |  |
|        |            |                                         |  |      |  |                                                  |  |            |  |          |  |  |  |  |  |  |  |  |  |
|        |            |                                         |  |      |  |                                                  |  |            |  |          |  |  |  |  |  |  |  |  |  |
|        |            |                                         |  |      |  |                                                  |  |            |  |          |  |  |  |  |  |  |  |  |  |
|        |            |                                         |  |      |  |                                                  |  |            |  |          |  |  |  |  |  |  |  |  |  |
|        |            |                                         |  |      |  |                                                  |  |            |  |          |  |  |  |  |  |  |  |  |  |
|        |            |                                         |  |      |  |                                                  |  |            |  |          |  |  |  |  |  |  |  |  |  |
|        |            |                                         |  |      |  |                                                  |  |            |  |          |  |  |  |  |  |  |  |  |  |
|        |            |                                         |  |      |  |                                                  |  |            |  |          |  |  |  |  |  |  |  |  |  |
|        |            |                                         |  |      |  |                                                  |  |            |  |          |  |  |  |  |  |  |  |  |  |
|        |            |                                         |  |      |  |                                                  |  |            |  |          |  |  |  |  |  |  |  |  |  |
|        |            |                                         |  |      |  |                                                  |  |            |  |          |  |  |  |  |  |  |  |  |  |
|        |            |                                         |  |      |  |                                                  |  |            |  |          |  |  |  |  |  |  |  |  |  |
|        |            |                                         |  |      |  |                                                  |  |            |  |          |  |  |  |  |  |  |  |  |  |
|        |            |                                         |  |      |  |                                                  |  |            |  |          |  |  |  |  |  |  |  |  |  |
|        |            |                                         |  |      |  |                                                  |  |            |  |          |  |  |  |  |  |  |  |  |  |
|        |            |                                         |  |      |  |                                                  |  |            |  |          |  |  |  |  |  |  |  |  |  |
|        |            |                                         |  |      |  |                                                  |  |            |  |          |  |  |  |  |  |  |  |  |  |
|        |            |                                         |  |      |  |                                                  |  |            |  |          |  |  |  |  |  |  |  |  |  |
|        |            |                                         |  |      |  |                                                  |  |            |  |          |  |  |  |  |  |  |  |  |  |
|        |            |                                         |  |      |  |                                                  |  |            |  |          |  |  |  |  |  |  |  |  |  |
|        |            |                                         |  |      |  |                                                  |  |            |  |          |  |  |  |  |  |  |  |  |  |
|        |            |                                         |  |      |  |                                                  |  |            |  |          |  |  |  |  |  |  |  |  |  |
|        |            |                                         |  |      |  |                                                  |  |            |  |          |  |  |  |  |  |  |  |  |  |
|        |            |                                         |  |      |  |                                                  |  |            |  |          |  |  |  |  |  |  |  |  |  |

Numero de Tormenta: 3  
 Tipo de Tormenta: 1  
 Fecha de Registro: 1999 9 25

| Puntos                      | Hora de registro del punto indicado (h) |       |          |      |          | Intervalo de tiempo en horas necesario para el registro del punto indicado |          |        |        |        |         |         |         |        |       |
|-----------------------------|-----------------------------------------|-------|----------|------|----------|----------------------------------------------------------------------------|----------|--------|--------|--------|---------|---------|---------|--------|-------|
|                             | Estacion                                |       |          |      |          | O.Oba.                                                                     |          | O.Oba. |        | O.Oba. |         | O.Oba.  |         | O.Oba. |       |
|                             | Quito                                   | Oba.  | Izobamba | Tola | Chorrera | Aeropuerto                                                                 | Inaquito | Chorr. | O.Oba. | Tola   | Inaqui. | Aeropu. | Inaqui. | Chorr. | Tola  |
| Inicio                      | 18.63                                   | 18.17 |          |      |          |                                                                            | 19.87    |        | 4034   | 11149  | 4497    | 7978    | 10233   | 6615   | 17874 |
| A                           | 23.52                                   | 21.98 |          |      |          |                                                                            | 24.009   |        |        |        | -0.84   |         |         |        |       |
| I. Max                      | 23.917                                  | 16.25 |          |      |          |                                                                            | 23.98    |        |        |        | -0.49   |         |         |        |       |
| Fin                         | 30.00                                   | 30.00 |          |      |          |                                                                            | 30.00    |        |        |        | 0.00    |         |         |        |       |
| Guardi                      | 2                                       | 80%   | 3        | 30%  |          |                                                                            | 6        | 40%    |        |        |         |         |         |        |       |
| Tiempo Promedio (h):        |                                         |       |          |      |          |                                                                            |          |        |        |        |         |         |         |        |       |
| Velocidades Promedio(m/s):  |                                         |       |          |      |          |                                                                            |          |        |        |        |         |         |         |        |       |
| Velocidades para Imax(m/s): |                                         |       |          |      |          |                                                                            |          |        |        |        |         |         |         |        |       |
| 3.18                        |                                         |       |          |      |          |                                                                            |          |        |        |        |         |         |         |        |       |

Numero de Tormenta: 4  
 Tipo de Tormenta: 1  
 Fecha de Registro: 1999 4 28

| Puntos                      | Hora de registro del punto indicado (h) |       |          |      |          | Intervalo de tiempo en horas necesario para el registro del punto indicado |          |        |        |        |         |         |         |        |       |
|-----------------------------|-----------------------------------------|-------|----------|------|----------|----------------------------------------------------------------------------|----------|--------|--------|--------|---------|---------|---------|--------|-------|
|                             | Estacion                                |       |          |      |          | O.Oba.                                                                     |          | O.Oba. |        | O.Oba. |         | O.Oba.  |         | O.Oba. |       |
|                             | Quito                                   | Oba.  | Izobamba | Tola | Chorrera | Aeropuerto                                                                 | Inaquito | Chorr. | O.Oba. | Tola   | Inaqui. | Aeropu. | Inaqui. | Chorr. | Tola  |
| Inicio                      | 17.68                                   | 16.17 |          |      |          |                                                                            | 17.83    |        | 4034   | 11149  | 4497    | 7978    | 10233   | 6615   | 17874 |
| A                           | 18.79                                   | 18.08 |          |      |          |                                                                            | 19.08    |        |        |        | -0.26   |         |         |        |       |
| I. Max                      | 17.87                                   | 16.25 |          |      |          |                                                                            | 17.90    |        |        |        | -0.29   |         |         |        |       |
| Fin                         | 20.00                                   | 20.00 |          |      |          |                                                                            | 20.33    |        |        |        | -0.03   |         |         |        |       |
| Guardi                      | 1                                       | 40%   | 1        | 40%  |          |                                                                            | 4        | 10%    |        |        | -0.33   |         |         |        |       |
| Tiempo Promedio (h):        |                                         |       |          |      |          |                                                                            |          |        |        |        |         |         |         |        |       |
| Velocidades Promedio(m/s):  |                                         |       |          |      |          |                                                                            |          |        |        |        |         |         |         |        |       |
| Velocidades para Imax(m/s): |                                         |       |          |      |          |                                                                            |          |        |        |        |         |         |         |        |       |
| 6.94                        |                                         |       |          |      |          |                                                                            |          |        |        |        |         |         |         |        |       |

Nota: Punto A, representa el punto al 50% del tiempo de cada tormenta

Numero de Tormenta: 5  
 Tipo de Tormenta: 1  
 Fecha de Registro: 1987 9 6

| Hora de registro del punto indicado (h) |             |          |       |          |            |          |               |               |             | Intervalo de tiempo en horas necesario para el registro del punto indicado |                |                |                |               |               |             |                |                |               |               |             |                |                |               |               |             |  |
|-----------------------------------------|-------------|----------|-------|----------|------------|----------|---------------|---------------|-------------|----------------------------------------------------------------------------|----------------|----------------|----------------|---------------|---------------|-------------|----------------|----------------|---------------|---------------|-------------|----------------|----------------|---------------|---------------|-------------|--|
| Puntos                                  | Estacion    |          |       |          |            |          |               |               |             |                                                                            |                |                |                |               |               |             |                |                |               |               |             |                |                |               |               |             |  |
|                                         | Quilbo Obs. | Izobamba | Tola  | Chorrera | Aeropuerto | Inaquito | Q.Oba. Izoba. | Q.Oba. Chorr. | Q.Oba. Tola | Q.Oba. Inequi.                                                             | Q.Oba. Aeropu. | Q.Oba. Inequi. | Q.Oba. Aeropu. | Q.Oba. Izoba. | Q.Oba. Chorr. | Q.Oba. Tola | Q.Oba. Inequi. | Q.Oba. Aeropu. | Q.Oba. Izoba. | Q.Oba. Chorr. | Q.Oba. Tola | Q.Oba. Inequi. | Q.Oba. Aeropu. | Q.Oba. Izoba. | Q.Oba. Chorr. | Q.Oba. Tola |  |
| Inicio                                  | 16.08       | 16.53    | 16.76 |          |            | 17.37    | 0.66          |               | -0.67       | -1.29                                                                      |                | 0.62           |                |               |               |             |                |                |               |               |             |                |                |               |               |             |  |
| A                                       | 16.87       | 16.87    | 17.33 |          |            | 17.81    | 0.00          |               | -0.67       | -1.14                                                                      |                | 0.48           |                |               |               |             |                |                |               |               |             |                |                |               |               |             |  |
| I. Max                                  | 16.38       | 16.87    | 17.04 |          |            | 17.61    | 0.71          |               | -0.67       | -1.23                                                                      |                | 0.57           |                |               |               |             |                |                |               |               |             |                |                |               |               |             |  |
| Fin                                     | 17.50       | 17.87    | 18.17 |          |            | 18.50    | -0.17         |               | -0.67       | -1.00                                                                      |                | 0.33           |                |               |               |             |                |                |               |               |             |                |                |               |               |             |  |
| Guardil                                 | 1           | 40%      | 1     | 70%      | 1          | 50%      |               |               |             |                                                                            |                |                |                |               |               |             |                |                |               |               |             |                |                |               |               |             |  |
| Tiempo Promedio (h.):                   |             |          |       |          |            |          |               |               |             |                                                                            |                |                |                |               |               |             |                |                |               |               |             |                |                |               |               |             |  |
| Velocidades Promedio (m/s):             |             |          |       |          |            |          |               |               |             |                                                                            |                |                |                |               |               |             |                |                |               |               |             |                |                |               |               |             |  |
| Velocidades para Imax(m/s):             |             |          |       |          |            |          |               |               |             |                                                                            |                |                |                |               |               |             |                |                |               |               |             |                |                |               |               |             |  |
| 18.01                                   |             |          |       |          |            |          |               |               |             | 5.99                                                                       |                |                |                |               |               |             |                |                |               |               |             |                |                |               |               |             |  |
| 6.94                                    |             |          |       |          |            |          |               |               |             | 5.00                                                                       |                |                |                |               |               |             |                |                |               |               |             |                |                |               |               |             |  |

Numero de Tormenta: 6  
 Tipo de Tormenta: 1  
 Fecha de Registro: 1986 5 10

| Hora de registro del punto indicado (h) |             |          |       |          |            |          |  |  |  | Intervalo de tiempo en horas necesario para el registro del punto indicado |  |  |  |  |  |  |  |  |  |
|-----------------------------------------|-------------|----------|-------|----------|------------|----------|--|--|--|----------------------------------------------------------------------------|--|--|--|--|--|--|--|--|--|
| Estacion                                |             |          |       |          |            |          |  |  |  |                                                                            |  |  |  |  |  |  |  |  |  |
| Puntos                                  | Quilbo Obs. | Izobamba | Tola  | Chorrera | Aeropuerto | Inaquito |  |  |  |                                                                            |  |  |  |  |  |  |  |  |  |
| Inicio                                  | 18.50       | 15.33    | 17.76 |          | 18.33      |          |  |  |  |                                                                            |  |  |  |  |  |  |  |  |  |
| I. Max                                  | 22.33       | 16.87    | 23.86 |          | 24.00      |          |  |  |  |                                                                            |  |  |  |  |  |  |  |  |  |
| Fin                                     | 26.17       | 28.00    | 28.17 |          | 28.08      |          |  |  |  |                                                                            |  |  |  |  |  |  |  |  |  |
| Guarú                                   | 4           | 30%      | 1     | 50%      | 3          | 10%      |  |  |  |                                                                            |  |  |  |  |  |  |  |  |  |
| Tiempo Promedio (h.):                   |             |          |       |          |            |          |  |  |  |                                                                            |  |  |  |  |  |  |  |  |  |
| Velocidades Promedio (m/s):             |             |          |       |          |            |          |  |  |  |                                                                            |  |  |  |  |  |  |  |  |  |
| Velocidades para Imax(m/s):             |             |          |       |          |            |          |  |  |  |                                                                            |  |  |  |  |  |  |  |  |  |
|                                         |             |          |       |          |            |          |  |  |  |                                                                            |  |  |  |  |  |  |  |  |  |
|                                         |             |          |       |          |            |          |  |  |  |                                                                            |  |  |  |  |  |  |  |  |  |
|                                         |             |          |       |          |            |          |  |  |  |                                                                            |  |  |  |  |  |  |  |  |  |
|                                         |             |          |       |          |            |          |  |  |  |                                                                            |  |  |  |  |  |  |  |  |  |
|                                         |             |          |       |          |            |          |  |  |  |                                                                            |  |  |  |  |  |  |  |  |  |
|                                         |             |          |       |          |            |          |  |  |  |                                                                            |  |  |  |  |  |  |  |  |  |
|                                         |             |          |       |          |            |          |  |  |  |                                                                            |  |  |  |  |  |  |  |  |  |
|                                         |             |          |       |          |            |          |  |  |  |                                                                            |  |  |  |  |  |  |  |  |  |
|                                         |             |          |       |          |            |          |  |  |  |                                                                            |  |  |  |  |  |  |  |  |  |
|                                         |             |          |       |          |            |          |  |  |  |                                                                            |  |  |  |  |  |  |  |  |  |
|                                         |             |          |       |          |            |          |  |  |  |                                                                            |  |  |  |  |  |  |  |  |  |
|                                         |             |          |       |          |            |          |  |  |  |                                                                            |  |  |  |  |  |  |  |  |  |
|                                         |             |          |       |          |            |          |  |  |  |                                                                            |  |  |  |  |  |  |  |  |  |
|                                         |             |          |       |          |            |          |  |  |  |                                                                            |  |  |  |  |  |  |  |  |  |
|                                         |             |          |       |          |            |          |  |  |  |                                                                            |  |  |  |  |  |  |  |  |  |
|                                         |             |          |       |          |            |          |  |  |  |                                                                            |  |  |  |  |  |  |  |  |  |
|                                         |             |          |       |          |            |          |  |  |  |                                                                            |  |  |  |  |  |  |  |  |  |
|                                         |             |          |       |          |            |          |  |  |  |                                                                            |  |  |  |  |  |  |  |  |  |
|                                         |             |          |       |          |            |          |  |  |  |                                                                            |  |  |  |  |  |  |  |  |  |
|                                         |             |          |       |          |            |          |  |  |  |                                                                            |  |  |  |  |  |  |  |  |  |
|                                         |             |          |       |          |            |          |  |  |  |                                                                            |  |  |  |  |  |  |  |  |  |
|                                         |             |          |       |          |            |          |  |  |  |                                                                            |  |  |  |  |  |  |  |  |  |
|                                         |             |          |       |          |            |          |  |  |  |                                                                            |  |  |  |  |  |  |  |  |  |
|                                         |             |          |       |          |            |          |  |  |  |                                                                            |  |  |  |  |  |  |  |  |  |
|                                         |             |          |       |          |            |          |  |  |  |                                                                            |  |  |  |  |  |  |  |  |  |
|                                         |             |          |       |          |            |          |  |  |  |                                                                            |  |  |  |  |  |  |  |  |  |
|                                         |             |          |       |          |            |          |  |  |  |                                                                            |  |  |  |  |  |  |  |  |  |
|                                         |             |          |       |          |            |          |  |  |  |                                                                            |  |  |  |  |  |  |  |  |  |
|                                         |             |          |       |          |            |          |  |  |  |                                                                            |  |  |  |  |  |  |  |  |  |
|                                         |             |          |       |          |            |          |  |  |  |                                                                            |  |  |  |  |  |  |  |  |  |
|                                         |             |          |       |          |            |          |  |  |  |                                                                            |  |  |  |  |  |  |  |  |  |
|                                         |             |          |       |          |            |          |  |  |  |                                                                            |  |  |  |  |  |  |  |  |  |
|                                         |             |          |       |          |            |          |  |  |  |                                                                            |  |  |  |  |  |  |  |  |  |
|                                         |             |          |       |          |            |          |  |  |  |                                                                            |  |  |  |  |  |  |  |  |  |
|                                         |             |          |       |          |            |          |  |  |  |                                                                            |  |  |  |  |  |  |  |  |  |
|                                         |             |          |       |          |            |          |  |  |  |                                                                            |  |  |  |  |  |  |  |  |  |
|                                         |             |          |       |          |            |          |  |  |  |                                                                            |  |  |  |  |  |  |  |  |  |
|                                         |             |          |       |          |            |          |  |  |  |                                                                            |  |  |  |  |  |  |  |  |  |
|                                         |             |          |       |          |            |          |  |  |  |                                                                            |  |  |  |  |  |  |  |  |  |
|                                         |             |          |       |          |            |          |  |  |  |                                                                            |  |  |  |  |  |  |  |  |  |
|                                         |             |          |       |          |            |          |  |  |  |                                                                            |  |  |  |  |  |  |  |  |  |
|                                         |             |          |       |          |            |          |  |  |  |                                                                            |  |  |  |  |  |  |  |  |  |
|                                         |             |          |       |          |            |          |  |  |  |                                                                            |  |  |  |  |  |  |  |  |  |
|                                         |             |          |       |          |            |          |  |  |  |                                                                            |  |  |  |  |  |  |  |  |  |
|                                         |             |          |       |          |            |          |  |  |  |                                                                            |  |  |  |  |  |  |  |  |  |
|                                         |             |          |       |          |            |          |  |  |  |                                                                            |  |  |  |  |  |  |  |  |  |
|                                         |             |          |       |          |            |          |  |  |  |                                                                            |  |  |  |  |  |  |  |  |  |
|                                         |             |          |       |          |            |          |  |  |  |                                                                            |  |  |  |  |  |  |  |  |  |
|                                         |             |          |       |          |            |          |  |  |  |                                                                            |  |  |  |  |  |  |  |  |  |
|                                         |             |          |       |          |            |          |  |  |  |                                                                            |  |  |  |  |  |  |  |  |  |
|                                         |             |          |       |          |            |          |  |  |  |                                                                            |  |  |  |  |  |  |  |  |  |
|                                         |             |          |       |          |            |          |  |  |  |                                                                            |  |  |  |  |  |  |  |  |  |
|                                         |             |          |       |          |            |          |  |  |  |                                                                            |  |  |  |  |  |  |  |  |  |
|                                         |             |          |       |          |            |          |  |  |  |                                                                            |  |  |  |  |  |  |  |  |  |
|                                         |             |          |       |          |            |          |  |  |  |                                                                            |  |  |  |  |  |  |  |  |  |
|                                         |             |          |       |          |            |          |  |  |  |                                                                            |  |  |  |  |  |  |  |  |  |
|                                         |             |          |       |          |            |          |  |  |  |                                                                            |  |  |  |  |  |  |  |  |  |
|                                         |             |          |       |          |            |          |  |  |  |                                                                            |  |  |  |  |  |  |  |  |  |
|                                         |             |          |       |          |            |          |  |  |  |                                                                            |  |  |  |  |  |  |  |  |  |
|                                         |             |          |       |          |            |          |  |  |  |                                                                            |  |  |  |  |  |  |  |  |  |
|                                         |             |          |       |          |            |          |  |  |  |                                                                            |  |  |  |  |  |  |  |  |  |
|                                         |             |          |       |          |            |          |  |  |  |                                                                            |  |  |  |  |  |  |  |  |  |
|                                         |             |          |       |          |            |          |  |  |  |                                                                            |  |  |  |  |  |  |  |  |  |
|                                         |             |          |       |          |            |          |  |  |  |                                                                            |  |  |  |  |  |  |  |  |  |
|                                         |             |          |       |          |            |          |  |  |  |                                                                            |  |  |  |  |  |  |  |  |  |
|                                         |             |          |       |          |            |          |  |  |  |                                                                            |  |  |  |  |  |  |  |  |  |
|                                         |             |          |       |          |            |          |  |  |  |                                                                            |  |  |  |  |  |  |  |  |  |
|                                         |             |          |       |          |            |          |  |  |  |                                                                            |  |  |  |  |  |  |  |  |  |
|                                         |             |          |       |          |            |          |  |  |  |                                                                            |  |  |  |  |  |  |  |  |  |
|                                         |             |          |       |          |            |          |  |  |  |                                                                            |  |  |  |  |  |  |  |  |  |
|                                         |             |          |       |          |            |          |  |  |  |                                                                            |  |  |  |  |  |  |  |  |  |
|                                         |             |          |       |          |            |          |  |  |  |                                                                            |  |  |  |  |  |  |  |  |  |
|                                         |             |          |       |          |            |          |  |  |  |                                                                            |  |  |  |  |  |  |  |  |  |
|                                         |             |          |       |          |            |          |  |  |  |                                                                            |  |  |  |  |  |  |  |  |  |
|                                         |             |          |       |          |            |          |  |  |  |                                                                            |  |  |  |  |  |  |  |  |  |
|                                         |             |          |       |          |            |          |  |  |  |                                                                            |  |  |  |  |  |  |  |  |  |
|                                         |             |          |       |          |            |          |  |  |  |                                                                            |  |  |  |  |  |  |  |  |  |
|                                         |             |          |       |          |            |          |  |  |  |                                                                            |  |  |  |  |  |  |  |  |  |
|                                         |             |          |       |          |            |          |  |  |  |                                                                            |  |  |  |  |  |  |  |  |  |
|                                         |             |          |       |          |            |          |  |  |  |                                                                            |  |  |  |  |  |  |  |  |  |
|                                         |             |          |       |          |            |          |  |  |  |                                                                            |  |  |  |  |  |  |  |  |  |
|                                         |             |          |       |          |            |          |  |  |  |                                                                            |  |  |  |  |  |  |  |  |  |
|                                         |             |          |       |          |            |          |  |  |  |                                                                            |  |  |  |  |  |  |  |  |  |
|                                         |             |          |       |          |            |          |  |  |  |                                                                            |  |  |  |  |  |  |  |  |  |
|                                         |             |          |       |          |            |          |  |  |  |                                                                            |  |  |  |  |  |  |  |  |  |
|                                         |             |          |       |          |            |          |  |  |  |                                                                            |  |  |  |  |  |  |  |  |  |
|                                         |             |          |       |          |            |          |  |  |  |                                                                            |  |  |  |  |  |  |  |  |  |
|                                         |             |          |       |          |            |          |  |  |  |                                                                            |  |  |  |  |  |  |  |  |  |
|                                         |             |          |       |          |            |          |  |  |  |                                                                            |  |  |  |  |  |  |  |  |  |
|                                         |             |          |       |          |            |          |  |  |  |                                                                            |  |  |  |  |  |  |  |  |  |
|                                         |             |          |       |          |            |          |  |  |  |                                                                            |  |  |  |  |  |  |  |  |  |
|                                         |             |          |       |          |            |          |  |  |  |                                                                            |  |  |  |  |  |  |  |  |  |
|                                         |             |          |       |          |            |          |  |  |  |                                                                            |  |  |  |  |  |  |  |  |  |
|                                         |             |          |       |          |            |          |  |  |  |                                                                            |  |  |  |  |  |  |  |  |  |
|                                         |             |          |       |          |            |          |  |  |  |                                                                            |  |  |  |  |  |  |  |  |  |
|                                         |             |          |       |          |            |          |  |  |  |                                                                            |  |  |  |  |  |  |  |  |  |
|                                         |             |          |       |          |            |          |  |  |  |                                                                            |  |  |  |  |  |  |  |  |  |
|                                         |             |          |       |          |            |          |  |  |  |                                                                            |  |  |  |  |  |  |  |  |  |
|                                         |             |          |       |          |            |          |  |  |  |                                                                            |  |  |  |  |  |  |  |  |  |
|                                         |             |          |       |          |            |          |  |  |  |                                                                            |  |  |  |  |  |  |  |  |  |
|                                         |             |          |       |          |            |          |  |  |  |                                                                            |  |  |  |  |  |  |  |  |  |
|                                         |             |          |       |          |            |          |  |  |  |                                                                            |  |  |  |  |  |  |  |  |  |
|                                         |             |          |       |          |            |          |  |  |  |                                                                            |  |  |  |  |  |  |  |  |  |
|                                         |             |          |       |          |            |          |  |  |  |                                                                            |  |  |  |  |  |  |  |  |  |
|                                         |             |          |       |          |            |          |  |  |  |                                                                            |  |  |  |  |  |  |  |  |  |
|                                         |             |          |       |          |            |          |  |  |  |                                                                            |  |  |  |  |  |  |  |  |  |
|                                         |             |          |       |          |            |          |  |  |  |                                                                            |  |  |  |  |  |  |  |  |  |
|                                         |             |          |       |          |            |          |  |  |  |                                                                            |  |  |  |  |  |  |  |  |  |
|                                         |             |          |       |          |            |          |  |  |  |                                                                            |  |  |  |  |  |  |  |  |  |
|                                         |             |          |       |          |            |          |  |  |  |                                                                            |  |  |  |  |  |  |  |  |  |
|                                         |             |          |       |          |            |          |  |  |  |                                                                            |  |  |  |  |  |  |  |  |  |
|                                         |             |          |       |          |            |          |  |  |  |                                                                            |  |  |  |  |  |  |  |  |  |
|                                         |             |          |       |          |            |          |  |  |  |                                                                            |  |  |  |  |  |  |  |  |  |
|                                         |             |          |       |          |            |          |  |  |  |                                                                            |  |  |  |  |  |  |  |  |  |
|                                         |             |          |       |          |            |          |  |  |  |                                                                            |  |  |  |  |  |  |  |  |  |
|                                         |             |          |       |          |            |          |  |  |  |                                                                            |  |  |  |  |  |  |  |  |  |
|                                         |             |          |       |          |            |          |  |  |  |                                                                            |  |  |  |  |  |  |  |  |  |
|                                         |             |          |       |          |            |          |  |  |  |                                                                            |  |  |  |  |  |  |  |  |  |
|                                         |             |          |       |          |            |          |  |  |  |                                                                            |  |  |  |  |  |  |  |  |  |
|                                         |             |          |       |          |            |          |  |  |  |                                                                            |  |  |  |  |  |  |  |  |  |
|                                         |             |          |       |          |            |          |  |  |  |                                                                            |  |  |  |  |  |  |  |  |  |
|                                         |             |          |       |          |            |          |  |  |  |                                                                            |  |  |  |  |  |  |  |  |  |
|                                         |             |          |       |          |            |          |  |  |  |                                                                            |  |  |  |  |  |  |  |  |  |
|                                         |             |          |       |          |            |          |  |  |  |                                                                            |  |  |  |  |  |  |  |  |  |
|                                         |             |          |       |          |            |          |  |  |  |                                                                            |  |  |  |  |  |  |  |  |  |
|                                         |             |          |       |          |            |          |  |  |  |                                                                            |  |  |  |  |  |  |  |  |  |
|                                         |             |          |       |          |            |          |  |  |  |                                                                            |  |  |  |  |  |  |  |  |  |
|                                         |             |          |       |          |            |          |  |  |  |                                                                            |  |  |  |  |  |  |  |  |  |
|                                         |             |          |       |          |            |          |  |  |  |                                                                            |  |  |  |  |  |  |  |  |  |
|                                         |             |          |       |          |            |          |  |  |  |                                                                            |  |  |  |  |  |  |  |  |  |
|                                         |             |          |       |          |            |          |  |  |  |                                                                            |  |  |  |  |  |  |  |  |  |
|                                         |             |          |       |          |            |          |  |  |  |                                                                            |  |  |  |  |  |  |  |  |  |
|                                         |             |          |       |          |            |          |  |  |  |                                                                            |  |  |  |  |  |  |  |  |  |
|                                         |             |          |       |          |            |          |  |  |  |                                                                            |  |  |  |  |  |  |  |  |  |
|                                         |             |          |       |          |            |          |  |  |  |                                                                            |  |  |  |  |  |  |  |  |  |
|                                         |             |          |       |          |            |          |  |  |  |                                                                            |  |  |  |  |  |  |  |  |  |
|                                         |             |          |       |          |            |          |  |  |  |                                                                            |  |  |  |  |  |  |  |  |  |
|                                         |             |          |       |          |            |          |  |  |  |                                                                            |  |  |  |  |  |  |  |  |  |
|                                         |             |          |       |          |            |          |  |  |  |                                                                            |  |  |  |  |  |  |  |  |  |
|                                         |             |          |       |          |            |          |  |  |  |                                                                            |  |  |  |  |  |  |  |  |  |
|                                         |             |          |       |          |            |          |  |  |  |                                                                            |  |  |  |  |  |  |  |  |  |
|                                         |             |          |       |          |            |          |  |  |  |                                                                            |  |  |  |  |  |  |  |  |  |
|                                         |             |          |       |          |            |          |  |  |  |                                                                            |  |  |  |  |  |  |  |  |  |
|                                         |             |          |       |          |            |          |  |  |  |                                                                            |  |  |  |  |  |  |  |  |  |
|                                         |             |          |       |          |            |          |  |  |  |                                                                            |  |  |  |  |  |  |  |  |  |
|                                         |             |          |       |          |            |          |  |  |  |                                                                            |  |  |  |  |  |  |  |  |  |
|                                         |             |          |       |          |            |          |  |  |  |                                                                            |  |  |  |  |  |  |  |  |  |
|                                         |             |          |       |          |            |          |  |  |  |                                                                            |  |  |  |  |  |  |  |  |  |
|                                         |             |          |       |          |            |          |  |  |  |                                                                            |  |  |  |  |  |  |  |  |  |
|                                         |             |          |       |          |            |          |  |  |  |                                                                            |  |  |  |  |  |  |  |  |  |
|                                         |             |          |       |          |            |          |  |  |  |                                                                            |  |  |  |  |  |  |  |  |  |
|                                         |             |          |       |          |            |          |  |  |  |                                                                            |  |  |  |  |  |  |  |  |  |
|                                         |             |          |       |          |            |          |  |  |  |                                                                            |  |  |  |  |  |  |  |  |  |
|                                         |             |          |       |          |            |          |  |  |  |                                                                            |  |  |  |  |  |  |  |  |  |
|                                         |             |          |       |          |            |          |  |  |  |                                                                            |  |  |  |  |  |  |  |  |  |
|                                         |             |          |       |          |            |          |  |  |  |                                                                            |  |  |  |  |  |  |  |  |  |
|                                         |             |          |       |          |            |          |  |  |  |                                                                            |  |  |  |  |  |  |  |  |  |
|                                         |             |          |       |          |            |          |  |  |  |                                                                            |  |  |  |  |  |  |  |  |  |
|                                         |             |          |       |          |            |          |  |  |  |                                                                            |  |  |  |  |  |  |  |  |  |
|                                         |             |          |       |          |            |          |  |  |  |                                                                            |  |  |  |  |  |  |  |  |  |
|                                         |             |          |       |          |            |          |  |  |  |                                                                            |  |  |  |  |  |  |  |  |  |
|                                         |             |          |       |          |            |          |  |  |  |                                                                            |  |  |  |  |  |  |  |  |  |
|                                         |             |          |       |          |            |          |  |  |  |                                                                            |  |  |  |  |  |  |  |  |  |
|                                         |             |          |       |          |            |          |  |  |  |                                                                            |  |  |  |  |  |  |  |  |  |
|                                         |             |          |       |          |            |          |  |  |  |                                                                            |  |  |  |  |  |  |  |  |  |
|                                         |             |          |       |          |            |          |  |  |  |                                                                            |  |  |  |  |  |  |  |  |  |
|                                         |             |          |       |          |            |          |  |  |  |                                                                            |  |  |  |  |  |  |  |  |  |
|                                         |             |          |       |          |            |          |  |  |  |                                                                            |  |  |  |  |  |  |  |  |  |
|                                         |             |          |       |          |            |          |  |  |  |                                                                            |  |  |  |  |  |  |  |  |  |
|                                         |             |          |       |          |            |          |  |  |  |                                                                            |  |  |  |  |  |  |  |  |  |
|                                         |             |          |       |          |            |          |  |  |  |                                                                            |  |  |  |  |  |  |  |  |  |
|                                         |             |          |       |          |            |          |  |  |  |                                                                            |  |  |  |  |  |  |  |  |  |
|                                         |             |          |       |          |            |          |  |  |  |                                                                            |  |  |  |  |  |  |  |  |  |
|                                         |             |          |       |          |            |          |  |  |  |                                                                            |  |  |  |  |  |  |  |  |  |
|                                         |             |          |       |          |            |          |  |  |  |                                                                            |  |  |  |  |  |  |  |  |  |
|                                         |             |          |       |          |            |          |  |  |  |                                                                            |  |  |  |  |  |  |  |  |  |
|                                         |             |          |       |          |            |          |  |  |  |                                                                            |  |  |  |  |  |  |  |  |  |
|                                         |             |          |       |          |            |          |  |  |  |                                                                            |  |  |  |  |  |  |  |  |  |
|                                         |             |          |       |          |            |          |  |  |  |                                                                            |  |  |  |  |  |  |  |  |  |
|                                         |             |          |       |          |            |          |  |  |  |                                                                            |  |  |  |  |  |  |  |  |  |
|                                         |             |          |       |          |            |          |  |  |  |                                                                            |  |  |  |  |  |  |  |  |  |
|                                         |             |          |       |          |            |          |  |  |  |                                                                            |  |  |  |  |  |  |  |  |  |
|                                         |             |          |       |          |            |          |  |  |  |                                                                            |  |  |  |  |  |  |  |  |  |
|                                         |             |          |       |          |            |          |  |  |  |                                                                            |  |  |  |  |  |  |  |  |  |
|                                         |             |          |       |          |            |          |  |  |  |                                                                            |  |  |  |  |  |  |  |  |  |
|                                         |             |          |       |          |            |          |  |  |  |                                                                            |  |  |  |  |  |  |  |  |  |
|                                         |             |          |       |          |            |          |  |  |  |                                                                            |  |  |  |  |  |  |  |  |  |
|                                         |             |          |       |          |            |          |  |  |  |                                                                            |  |  |  |  |  |  |  |  |  |
|                                         |             |          |       |          |            |          |  |  |  |                                                                            |  |  |  |  |  |  |  |  |  |
|                                         |             |          |       |          |            |          |  |  |  |                                                                            |  |  |  |  |  |  |  |  |  |
|                                         |             |          |       |          |            |          |  |  |  |                                                                            |  |  |  |  |  |  |  |  |  |
|                                         |             |          |       |          |            |          |  |  |  |                                                                            |  |  |  |  |  |  |  |  |  |
|                                         |             |          |       |          |            |          |  |  |  |                                                                            |  |  |  |  |  |  |  |  |  |
|                                         |             |          |       |          |            |          |  |  |  |                                                                            |  |  |  |  |  |  |  |  |  |
|                                         |             |          |       |          |            |          |  |  |  |                                                                            |  |  |  |  |  |  |  |  |  |
|                                         |             |          |       |          |            |          |  |  |  |                                                                            |  |  |  |  |  |  |  |  |  |
|                                         |             |          |       |          |            |          |  |  |  |                                                                            |  |  |  |  |  |  |  |  |  |
|                                         |             |          |       |          |            |          |  |  |  |                                                                            |  |  |  |  |  |  |  |  |  |
|                                         |             |          |       |          |            |          |  |  |  |                                                                            |  |  |  |  |  |  |  |  |  |
|                                         |             |          |       |          |            |          |  |  |  |                                                                            |  |  |  |  |  |  |  |  |  |
|                                         |             |          |       |          |            |          |  |  |  |                                                                            |  |  |  |  |  |  |  |  |  |
|                                         |             |          |       |          |            |          |  |  |  |                                                                            |  |  |  |  |  |  |  |  |  |
|                                         |             |          |       |          |            |          |  |  |  |                                                                            |  |  |  |  |  |  |  |  |  |
|                                         |             |          |       |          |            |          |  |  |  |                                                                            |  |  |  |  |  |  |  |  |  |
|                                         |             |          |       |          |            |          |  |  |  |                                                                            |  |  |  |  |  |  |  |  |  |
|                                         |             |          |       |          |            |          |  |  |  |                                                                            |  |  |  |  |  |  |  |  |  |
|                                         |             |          |       |          |            |          |  |  |  |                                                                            |  |  |  |  |  |  |  |  |  |
|                                         |             |          |       |          |            |          |  |  |  |                                                                            |  |  |  |  |  |  |  |  |  |
|                                         |             |          |       |          |            |          |  |  |  |                                                                            |  |  |  |  |  |  |  |  |  |
|                                         |             |          |       |          |            |          |  |  |  |                                                                            |  |  |  |  |  |  |  |  |  |
|                                         |             |          |       |          |            |          |  |  |  |                                                                            |  |  |  |  |  |  |  |  |  |
|                                         |             |          |       |          |            |          |  |  |  |                                                                            |  |  |  |  |  |  |  |  |  |
|                                         |             |          |       |          |            |          |  |  |  |                                                                            |  |  |  |  |  |  |  |  |  |
|                                         |             |          |       |          |            |          |  |  |  |                                                                            |  |  |  |  |  |  |  |  |  |
|                                         |             |          |       |          |            |          |  |  |  |                                                                            |  |  |  |  |  |  |  |  |  |

Numero de Tormenta: 7  
 Tipo de Tormenta: 1  
 Fecha de Registro: 1984 8 20

| Puntos                                                      | Hora de registro del punto indicado (h) |          |       |          |            |          |   |     |  |  | Tiempo necesario para que las estaciones registren el punto indicado |         |         |         |         |         |         |        |        |      |
|-------------------------------------------------------------|-----------------------------------------|----------|-------|----------|------------|----------|---|-----|--|--|----------------------------------------------------------------------|---------|---------|---------|---------|---------|---------|--------|--------|------|
|                                                             | Estacion                                |          |       |          |            |          |   |     |  |  |                                                                      |         |         |         |         |         |         |        |        |      |
|                                                             | Quilbo Obs.                             | Izobamba | Tola  | Chorrera | Aeropuerto | Inequito |   |     |  |  | Q. obs.                                                              | Q. obs. | Q. obs. | Q. obs. | Inequi. | Inequi. | Inequi. | Chorr. | Chorr. | Tola |
| I. Max                                                      | 14.92                                   | 13.73    | 19.57 | 15.19    | 19.53      |          |   |     |  |  |                                                                      |         |         |         |         |         |         |        |        |      |
| Cuartil                                                     | 1                                       | 80%      | 1     | 80%      | 1          | 20%      | 4 | 20% |  |  |                                                                      |         |         |         |         |         |         |        |        |      |
| Velocidades para Imax (m/s):                                |                                         |          |       |          |            |          |   |     |  |  |                                                                      |         |         |         |         |         |         |        |        |      |
| Distancia (m.)                                              |                                         |          |       |          |            |          |   |     |  |  |                                                                      |         |         |         |         |         |         |        |        |      |
| 17987 4034 11149 4487 7978 3993 10233 9615 17874 9609 12935 |                                         |          |       |          |            |          |   |     |  |  |                                                                      |         |         |         |         |         |         |        |        |      |
| 1.18 -0.28 -4.85 -4.71                                      |                                         |          |       |          |            |          |   |     |  |  |                                                                      |         |         |         |         |         |         |        |        |      |
| 4.15 -4.07 -0.87 --- -0.47 --- --- 3.40 -0.84 -61.95        |                                         |          |       |          |            |          |   |     |  |  |                                                                      |         |         |         |         |         |         |        |        |      |

Numero de Tormenta: 8  
 Tipo de Tormenta: 1  
 Fecha de Registro: 1984 4 30

| Puntos                                                      | Hora de registro del punto indicado (h) |          |       |          |            |          |   |     |   |     | Velocidades de movimiento entre estaciones (m/s) |         |         |         |         |         |         |        |        |      |
|-------------------------------------------------------------|-----------------------------------------|----------|-------|----------|------------|----------|---|-----|---|-----|--------------------------------------------------|---------|---------|---------|---------|---------|---------|--------|--------|------|
|                                                             | Estacion                                |          |       |          |            |          |   |     |   |     |                                                  |         |         |         |         |         |         |        |        |      |
|                                                             | Quilbo Obs.                             | Izobamba | Tola  | Chorrera | Aeropuerto | Inequito |   |     |   |     | Q. obs.                                          | Q. obs. | Q. obs. | Q. obs. | Inequi. | Inequi. | Inequi. | Chorr. | Chorr. | Tola |
| Inicio                                                      |                                         | 14.00    |       | 13.47    | 13.33      |          |   |     |   |     |                                                  |         |         |         |         |         |         |        |        |      |
| A                                                           |                                         | 14.90    |       | 14.13    | 14.83      |          |   |     |   |     |                                                  |         |         |         |         |         |         |        |        |      |
| B                                                           |                                         | 17.33    |       | 16.50    | 20.42      |          |   |     |   |     |                                                  |         |         |         |         |         |         |        |        |      |
| C                                                           |                                         | 19.50    |       | 18.00    | 20.83      |          |   |     |   |     |                                                  |         |         |         |         |         |         |        |        |      |
| D                                                           | 20.92                                   | 22.83    | 22.00 | 20.83    | 24.00      |          |   |     |   |     |                                                  |         |         |         |         |         |         |        |        |      |
| I. Max                                                      | 24.00                                   | 14.40    | 24.25 | 24.18    | 24.90      |          |   |     |   |     |                                                  |         |         |         |         |         |         |        |        |      |
| Fin                                                         | 20.00                                   | 25.87    | 24.83 | 23.87    | 28.83      |          |   |     |   |     |                                                  |         |         |         |         |         |         |        |        |      |
| Cuartil                                                     | 2                                       | 50%      | 1     | 80%      | 2          | 70%      | 4 | 10% | 4 | 30% |                                                  |         |         |         |         |         |         |        |        |      |
| Tiempo Promedio (h.):                                       |                                         |          |       |          |            |          |   |     |   |     |                                                  |         |         |         |         |         |         |        |        |      |
| Velocidades Promedio (m/s):                                 |                                         |          |       |          |            |          |   |     |   |     |                                                  |         |         |         |         |         |         |        |        |      |
| Velocidades para Imax (m/s):                                |                                         |          |       |          |            |          |   |     |   |     |                                                  |         |         |         |         |         |         |        |        |      |
| 17987 4034 11149 4487 7978 3993 10233 9615 17874 9609 12935 |                                         |          |       |          |            |          |   |     |   |     |                                                  |         |         |         |         |         |         |        |        |      |
| -1.82 0.08 -1.08 -3.08 -0.90 0.37                           |                                         |          |       |          |            |          |   |     |   |     |                                                  |         |         |         |         |         |         |        |        |      |
| 9.80 -0.18 -0.25 -0.90 0.37                                 |                                         |          |       |          |            |          |   |     |   |     |                                                  |         |         |         |         |         |         |        |        |      |
| 2.33 -0.87 4.17                                             |                                         |          |       |          |            |          |   |     |   |     |                                                  |         |         |         |         |         |         |        |        |      |
| 3.34 -0.25 0.94 --- -1.21 --- --- 1.02 -1.45 -2.15          |                                         |          |       |          |            |          |   |     |   |     |                                                  |         |         |         |         |         |         |        |        |      |
| 1.47 -4.41 3.28 --- -1.84 --- --- 4.98 -1.85 -1.87          |                                         |          |       |          |            |          |   |     |   |     |                                                  |         |         |         |         |         |         |        |        |      |
| 0.51 -0.23 -12.30 --- -2.45 --- --- 0.51 -3.32 -5.53        |                                         |          |       |          |            |          |   |     |   |     |                                                  |         |         |         |         |         |         |        |        |      |

1982 12 7 -4

|                     |      |
|---------------------|------|
| Numero de Tormenta: | 10   |
| Tipo de Tormenta:   | 1    |
| Fecha de Registro:  | 1981 |

५५





Numero de Tormenta: 1  
 Tipo de Tormenta: 2  
 Fecha de Registro: 1992 12 20

| Puntos  | Hora de registro del punto indicado (h) |          |      |          |            |          |                                                                            |         |         |        |
|---------|-----------------------------------------|----------|------|----------|------------|----------|----------------------------------------------------------------------------|---------|---------|--------|
|         | Estación                                |          |      |          |            |          |                                                                            |         |         |        |
|         | Quito                                   | Izobamba | Tola | Chorrera | Aeropuerto | Inaquito | Intervalo de tiempo en horas necesario para el registro del punto indicado |         |         |        |
|         | Obs.                                    |          |      |          |            |          | O. obs.                                                                    | Chorr.  | O. obs. | Izoba. |
|         |                                         |          |      |          |            |          | Inaqui.                                                                    | Aeropu. | O. obs. | Izoba. |
|         |                                         |          |      |          |            |          |                                                                            |         |         |        |
| Inicio  | 18.75                                   |          |      |          |            | 17.57    | 4497                                                                       | 7978    | 3903    | 10233  |
| A       | 21.564                                  |          |      |          |            | 20.43    | 1.08                                                                       |         |         |        |
| B       | 23.25                                   |          |      |          |            | 22.17    | 1.15                                                                       |         |         |        |
| C       | 26.00                                   |          |      |          |            | 27.00    | 1.08                                                                       |         |         |        |
| D       | 30.00                                   |          |      |          |            | 28.42    | -1.00                                                                      |         |         |        |
| I. Max  | 20.58                                   |          |      |          |            | 19.39    | 1.58                                                                       |         |         |        |
| Fin     | 32.00                                   |          |      |          |            | 30       | 1.19                                                                       |         |         |        |
| Cuartil | 1                                       | 90%      |      |          |            |          | 2.00                                                                       |         |         |        |
|         |                                         |          |      |          |            |          | 1.77                                                                       |         |         |        |
|         |                                         |          |      |          |            |          | 0.71                                                                       |         |         |        |
|         |                                         |          |      |          |            |          | 1.05                                                                       |         |         |        |

Nota: Punto A, escogido del diagrama edimencional cuando el 50% de la duracion ha transcurrido

Numero de Tormenta: 2  
 Tipo de Tormenta: 2  
 Fecha de Registro: 1997 1 19

| Puntos  | Hora de registro del punto indicado (h) |          |       |          |            |          |                                                                            |         |         |        |
|---------|-----------------------------------------|----------|-------|----------|------------|----------|----------------------------------------------------------------------------|---------|---------|--------|
|         | Estación                                |          |       |          |            |          |                                                                            |         |         |        |
|         | Quito                                   | Izobamba | Tola  | Chorrera | Aeropuerto | Inaquito | Intervalo de tiempo en horas necesario para el registro del punto indicado |         |         |        |
|         | Obs.                                    |          |       |          |            |          | O. obs.                                                                    | Chorr.  | O. obs. | Izoba. |
|         |                                         |          |       |          |            |          | Inaqui.                                                                    | Aeropu. | O. obs. | Izoba. |
|         |                                         |          |       |          |            |          |                                                                            |         |         |        |
| Inicio  | 18.75                                   | 18.50    | 18.58 |          |            | 16.83    | 4497                                                                       | 7978    | 3903    | 10233  |
| A       | 17.87                                   |          |       |          |            | 17.5     | -0.08                                                                      |         |         | -1.75  |
| B       | 18.87                                   |          |       |          |            | 18.5     | 0.17                                                                       |         |         |        |
| I. Max  | 17.21                                   | 20.33    | 20.00 |          |            | 17.165   | 0.17                                                                       |         |         |        |
| Fin     | 19.58                                   | 23.00    | 20.33 |          |            | 19.33    | 0.04                                                                       |         |         | -2.84  |
| Cuartil | 1                                       | 30%      | 1     | 30%      | 1          | 50%      | 0.25                                                                       |         |         | -1.00  |
|         |                                         |          |       |          |            |          | -0.76                                                                      |         |         |        |
|         |                                         |          |       |          |            |          | -1.79                                                                      |         |         |        |
|         |                                         |          |       |          |            |          | 0.11                                                                       |         |         | -1.88  |
|         |                                         |          |       |          |            |          | 11.34                                                                      |         |         | -1.53  |
|         |                                         |          |       |          |            |          | 28.39                                                                      |         |         | -1.00  |

Numero de Tormenta: 3  
 Tipo de Tormenta: 2  
 Fecha de Registro: 1988 12 23

| Puntos                      | Hora de registro del punto indicado (h) |          |      |          |            |          |        |        |        |                | Intervalo de tiempo en horas necesario para el registro del punto indicado |        |         |        |         |        |         |  |         |  |         |  |
|-----------------------------|-----------------------------------------|----------|------|----------|------------|----------|--------|--------|--------|----------------|----------------------------------------------------------------------------|--------|---------|--------|---------|--------|---------|--|---------|--|---------|--|
|                             | Estacion                                |          |      |          |            |          |        |        |        |                |                                                                            |        |         |        |         |        |         |  |         |  |         |  |
|                             | Quiló<br>Obs.                           | Izobamba | Tola | Chorrera | Aeropuerto | Inequito | O.obe. |        | Tola   |                | O.obe.                                                                     |        | Inequi. |        | Aeropu. |        | O.obe.  |  | Inequi. |  | Aeropu. |  |
|                             |                                         |          |      |          |            |          | Chorr. | O.obe. | Chorr. | O.obe.         | Inequi.                                                                    | O.obe. | Inequi. | O.obe. | Inequi. | O.obe. | Inequi. |  |         |  |         |  |
| Inicio                      | 16.00                                   | 18.42    |      |          | 16.67      | 16.5     |        |        |        |                |                                                                            |        |         |        |         |        |         |  |         |  |         |  |
| I. Max                      | 16.25                                   | 18.50    |      |          | 16.76      | 16.25    |        |        |        |                |                                                                            |        |         |        |         |        |         |  |         |  |         |  |
| Fin                         | 16.50                                   | 18.76    |      |          | 16.92      | 17       |        |        |        |                |                                                                            |        |         |        |         |        |         |  |         |  |         |  |
| Guardil                     | 1                                       | 10%      | 1    | 30%      | 1          | 10%      | 3      | 70%    |        |                |                                                                            |        |         |        |         |        |         |  |         |  |         |  |
| Tiempo Promedio (h.):       |                                         |          |      |          |            |          |        |        |        | Distancia (m.) |                                                                            |        |         |        |         |        |         |  |         |  |         |  |
| Velocidades Promedio (m/s): |                                         |          |      |          |            |          |        |        |        |                |                                                                            |        |         |        |         |        |         |  |         |  |         |  |
| Velocidades para Imax(m/s): |                                         |          |      |          |            |          |        |        |        |                |                                                                            |        |         |        |         |        |         |  |         |  |         |  |
| ---                         |                                         |          |      |          |            |          |        |        |        | ---            |                                                                            |        |         |        |         |        |         |  |         |  |         |  |
| ---                         |                                         |          |      |          |            |          |        |        |        | ---            |                                                                            |        |         |        |         |        |         |  |         |  |         |  |
| ---                         |                                         |          |      |          |            |          |        |        |        | ---            |                                                                            |        |         |        |         |        |         |  |         |  |         |  |

---: Proceso simultaneo en el tiempo

Numero de Tormenta: 4  
 Tipo de Tormenta: 2  
 Fecha de Registro: 1988 3 12

| Hora de registro del punto indicado (h) |            |          |       |          |        |            |          |        |        | Intervalo de tiempo en horas necesario para el registro del punto indicado |         |         |        |         |         |      |        |         |        |
|-----------------------------------------|------------|----------|-------|----------|--------|------------|----------|--------|--------|----------------------------------------------------------------------------|---------|---------|--------|---------|---------|------|--------|---------|--------|
| Puntos                                  | Estacion   |          |       |          |        | Aeropuerto | Inaquito |        |        |                                                                            |         |         |        |         |         |      |        |         |        |
|                                         | Quito Oba. | Izobamba | Tola  | Chorrera | Q.obe. |            |          | Q.obe. | Chorr. | Tola                                                                       | Inaqui. | Aeropu. | Q.obe. | Inaqui. | Aeropu. | Tola | Chorr. | Inaqui. | Chorr. |
| Inicio                                  | 18.50      | 21.17    | 19.50 |          |        |            | 18.33    |        |        |                                                                            |         |         |        |         |         |      |        |         |        |
| A                                       | 20.00      | 22.50    |       |          |        |            | 19.33    |        |        |                                                                            |         |         |        |         |         |      |        |         |        |
| B                                       | 22.00      | 24.08    |       |          |        |            | 21.25    |        |        |                                                                            |         |         |        |         |         |      |        |         |        |
| I. Max                                  | 19.25      | 21.83    | 21.30 |          |        |            | 18.817   |        |        |                                                                            |         |         |        |         |         |      |        |         |        |
| Fin                                     | 31.00      | 33.00    | 31.00 |          |        |            | 30       |        |        |                                                                            |         |         |        |         |         |      |        |         |        |
| Cuartil                                 | 3          | 10%      | 3     | 40%      | 1      | 70%        |          | 4      | 10%    |                                                                            |         |         |        |         |         |      |        |         |        |
| Tiempo Promedio (h.):                   |            |          |       |          |        |            |          |        |        | Distancia (m.)                                                             |         |         |        |         |         |      |        |         |        |
| Velocidades Promedio (m/s):             |            |          |       |          |        |            |          |        |        |                                                                            |         |         |        |         |         |      |        |         |        |
| Velocidades para Imax(m/s):             |            |          |       |          |        |            |          |        |        |                                                                            |         |         |        |         |         |      |        |         |        |
| ---                                     |            |          |       |          |        |            |          |        |        | ---                                                                        |         |         |        |         |         |      |        |         |        |
| ---                                     |            |          |       |          |        |            |          |        |        | ---                                                                        |         |         |        |         |         |      |        |         |        |
| ---                                     |            |          |       |          |        |            |          |        |        | ---                                                                        |         |         |        |         |         |      |        |         |        |

Numero de Tormenta: 5  
 Tipo de Tormenta: 2  
 Fecha de Registro: 1985 12 26

| Hora de registro del punto indicado (h) |               |          |      |          |            |           |        |        |        |      | Intervalo de tiempo en horas necesario para el registro del punto indicado |         |        |            |         |      |        |            |        |      |
|-----------------------------------------|---------------|----------|------|----------|------------|-----------|--------|--------|--------|------|----------------------------------------------------------------------------|---------|--------|------------|---------|------|--------|------------|--------|------|
| Puntos                                  | Estacion      |          |      |          |            | Inaquitto |        |        |        |      |                                                                            |         |        |            |         |      |        |            |        |      |
|                                         | Quito<br>Obs. | Izobamba | Tola | Chorrera | Aeropuerto |           | Q.obe. | Chorr. | Q.obe. | Tola | Inaquitto.                                                                 | Aeropu. | Q.obe. | Inaquitto. | Aeropu. | Tola | Chorr. | Inaquitto. | Chorr. | Tola |
|                                         |               |          |      |          |            |           |        |        |        |      |                                                                            |         |        |            |         |      |        |            |        |      |
|                                         |               |          |      |          |            |           |        |        |        |      |                                                                            |         |        |            |         |      |        |            |        |      |
|                                         |               |          |      |          |            |           |        |        |        |      |                                                                            |         |        |            |         |      |        |            |        |      |
|                                         |               |          |      |          |            |           |        |        |        |      |                                                                            |         |        |            |         |      |        |            |        |      |
|                                         |               |          |      |          |            |           |        |        |        |      |                                                                            |         |        |            |         |      |        |            |        |      |
|                                         |               |          |      |          |            |           |        |        |        |      |                                                                            |         |        |            |         |      |        |            |        |      |
|                                         |               |          |      |          |            |           |        |        |        |      |                                                                            |         |        |            |         |      |        |            |        |      |
|                                         |               |          |      |          |            |           |        |        |        |      |                                                                            |         |        |            |         |      |        |            |        |      |
|                                         |               |          |      |          |            |           |        |        |        |      |                                                                            |         |        |            |         |      |        |            |        |      |
|                                         |               |          |      |          |            |           |        |        |        |      |                                                                            |         |        |            |         |      |        |            |        |      |
|                                         |               |          |      |          |            |           |        |        |        |      |                                                                            |         |        |            |         |      |        |            |        |      |
|                                         |               |          |      |          |            |           |        |        |        |      |                                                                            |         |        |            |         |      |        |            |        |      |
|                                         |               |          |      |          |            |           |        |        |        |      |                                                                            |         |        |            |         |      |        |            |        |      |
|                                         |               |          |      |          |            |           |        |        |        |      |                                                                            |         |        |            |         |      |        |            |        |      |
|                                         |               |          |      |          |            |           |        |        |        |      |                                                                            |         |        |            |         |      |        |            |        |      |
|                                         |               |          |      |          |            |           |        |        |        |      |                                                                            |         |        |            |         |      |        |            |        |      |
|                                         |               |          |      |          |            |           |        |        |        |      |                                                                            |         |        |            |         |      |        |            |        |      |
|                                         |               |          |      |          |            |           |        |        |        |      |                                                                            |         |        |            |         |      |        |            |        |      |
|                                         |               |          |      |          |            |           |        |        |        |      |                                                                            |         |        |            |         |      |        |            |        |      |
|                                         |               |          |      |          |            |           |        |        |        |      |                                                                            |         |        |            |         |      |        |            |        |      |
|                                         |               |          |      |          |            |           |        |        |        |      |                                                                            |         |        |            |         |      |        |            |        |      |
|                                         |               |          |      |          |            |           |        |        |        |      |                                                                            |         |        |            |         |      |        |            |        |      |
|                                         |               |          |      |          |            |           |        |        |        |      |                                                                            |         |        |            |         |      |        |            |        |      |
|                                         |               |          |      |          |            |           |        |        |        |      |                                                                            |         |        |            |         |      |        |            |        |      |
|                                         |               |          |      |          |            |           |        |        |        |      |                                                                            |         |        |            |         |      |        |            |        |      |
|                                         |               |          |      |          |            |           |        |        |        |      |                                                                            |         |        |            |         |      |        |            |        |      |
|                                         |               |          |      |          |            |           |        |        |        |      |                                                                            |         |        |            |         |      |        |            |        |      |
|                                         |               |          |      |          |            |           |        |        |        |      |                                                                            |         |        |            |         |      |        |            |        |      |
|                                         |               |          |      |          |            |           |        |        |        |      |                                                                            |         |        |            |         |      |        |            |        |      |
|                                         |               |          |      |          |            |           |        |        |        |      |                                                                            |         |        |            |         |      |        |            |        |      |
|                                         |               |          |      |          |            |           |        |        |        |      |                                                                            |         |        |            |         |      |        |            |        |      |
|                                         |               |          |      |          |            |           |        |        |        |      |                                                                            |         |        |            |         |      |        |            |        |      |
|                                         |               |          |      |          |            |           |        |        |        |      |                                                                            |         |        |            |         |      |        |            |        |      |
|                                         |               |          |      |          |            |           |        |        |        |      |                                                                            |         |        |            |         |      |        |            |        |      |
|                                         |               |          |      |          |            |           |        |        |        |      |                                                                            |         |        |            |         |      |        |            |        |      |
|                                         |               |          |      |          |            |           |        |        |        |      |                                                                            |         |        |            |         |      |        |            |        |      |
|                                         |               |          |      |          |            |           |        |        |        |      |                                                                            |         |        |            |         |      |        |            |        |      |
|                                         |               |          |      |          |            |           |        |        |        |      |                                                                            |         |        |            |         |      |        |            |        |      |
|                                         |               |          |      |          |            |           |        |        |        |      |                                                                            |         |        |            |         |      |        |            |        |      |
|                                         |               |          |      |          |            |           |        |        |        |      |                                                                            |         |        |            |         |      |        |            |        |      |
|                                         |               |          |      |          |            |           |        |        |        |      |                                                                            |         |        |            |         |      |        |            |        |      |
|                                         |               |          |      |          |            |           |        |        |        |      |                                                                            |         |        |            |         |      |        |            |        |      |
|                                         |               |          |      |          |            |           |        |        |        |      |                                                                            |         |        |            |         |      |        |            |        |      |
|                                         |               |          |      |          |            |           |        |        |        |      |                                                                            |         |        |            |         |      |        |            |        |      |
|                                         |               |          |      |          |            |           |        |        |        |      |                                                                            |         |        |            |         |      |        |            |        |      |
|                                         |               |          |      |          |            |           |        |        |        |      |                                                                            |         |        |            |         |      |        |            |        |      |
|                                         |               |          |      |          |            |           |        |        |        |      |                                                                            |         |        |            |         |      |        |            |        |      |
|                                         |               |          |      |          |            |           |        |        |        |      |                                                                            |         |        |            |         |      |        |            |        |      |
|                                         |               |          |      |          |            |           |        |        |        |      |                                                                            |         |        |            |         |      |        |            |        |      |
|                                         |               |          |      |          |            |           |        |        |        |      |                                                                            |         |        |            |         |      |        |            |        |      |
|                                         |               |          |      |          |            |           |        |        |        |      |                                                                            |         |        |            |         |      |        |            |        |      |
|                                         |               |          |      |          |            |           |        |        |        |      |                                                                            |         |        |            |         |      |        |            |        |      |
|                                         |               |          |      |          |            |           |        |        |        |      |                                                                            |         |        |            |         |      |        |            |        |      |
|                                         |               |          |      |          |            |           |        |        |        |      |                                                                            |         |        |            |         |      |        |            |        |      |
|                                         |               |          |      |          |            |           |        |        |        |      |                                                                            |         |        |            |         |      |        |            |        |      |
|                                         |               |          |      |          |            |           |        |        |        |      |                                                                            |         |        |            |         |      |        |            |        |      |
|                                         |               |          |      |          |            |           |        |        |        |      |                                                                            |         |        |            |         |      |        |            |        |      |
|                                         |               |          |      |          |            |           |        |        |        |      |                                                                            |         |        |            |         |      |        |            |        |      |
|                                         |               |          |      |          |            |           |        |        |        |      |                                                                            |         |        |            |         |      |        |            |        |      |
|                                         |               |          |      |          |            |           |        |        |        |      |                                                                            |         |        |            |         |      |        |            |        |      |

Numero de Tormenta: 6  
 Tipo de Tormenta: 2  
 Fecha de Registro: 1985 10 9

| Puntos                      | Hora de registro del punto indicado (h) |       |          |     |       |       |          |  |            |  | Velocidades de movimiento entre estaciones (m/s) |   |        |        |        |       |          |        |         |          |         |       |        |        |        |       |         |   |   |       |      |      |   |      |   |
|-----------------------------|-----------------------------------------|-------|----------|-----|-------|-------|----------|--|------------|--|--------------------------------------------------|---|--------|--------|--------|-------|----------|--------|---------|----------|---------|-------|--------|--------|--------|-------|---------|---|---|-------|------|------|---|------|---|
|                             | Estacion                                |       |          |     |       |       |          |  |            |  |                                                  |   |        |        |        |       |          |        |         |          |         |       |        |        |        |       |         |   |   |       |      |      |   |      |   |
|                             | Quito                                   |       | Izobamba |     | Tola  |       | Chorrera |  | Aeropuerto |  | Inaquito                                         |   |        |        |        |       |          |        |         |          |         |       |        |        |        |       |         |   |   |       |      |      |   |      |   |
|                             | Obs.                                    |       |          |     |       |       |          |  |            |  |                                                  |   | Q.obe. | Chorr. | Q.obe. | Tola  | Inaquit. | Q.obe. | Aeropu. | Inaquit. | Aeropu. | Tola  | Chorr. | Izoba. | Chorr. | Tola  | Aeropu. |   |   |       |      |      |   |      |   |
| Inicio                      | 13.12                                   | 12.83 | 14.53    |     | 14.13 | 12.17 |          |  |            |  |                                                  |   |        |        |        |       | 17.667   | 4034   | 11149   | 4497     | 7978    | 3983  | 10233  | 6615   | 17874  | 8609  |         |   |   | 12935 |      |      |   |      |   |
| A                           | 13.50                                   | 13.42 | 14.90    |     |       | 13.17 |          |  |            |  |                                                  |   |        |        |        |       | 0.28     |        | -1.42   | 0.95     | -1.02   | -1.96 | -2.36  |        |        | -1.63 |         |   |   |       | 0.40 |      |   |      |   |
| I. Max                      | 13.31                                   | 13.13 | 14.87    |     | 14.67 | 12.67 |          |  |            |  |                                                  |   |        |        |        |       | 0.08     |        | -1.30   | 0.33     |         |       |        |        |        |       |         |   |   |       |      | 0.00 |   |      |   |
| Fin                         | 14.67                                   | 14.67 | 15.50    |     | 14.83 | 14.33 |          |  |            |  |                                                  |   |        |        |        |       | 0.18     |        | -1.36   | 0.64     | -1.36   | -2.00 | -2.00  |        |        |       |         |   |   |       | 0.00 |      |   |      |   |
| Guardi                      | 1                                       | 30%   | 1        | 60% | 1     | 50%   |          |  |            |  |                                                  |   |        |        |        |       | 0.00     |        | -0.83   | 0.34     | -0.17   | -0.50 | -1.17  |        |        |       |         |   |   |       | 0.67 |      |   |      |   |
| Tiempo Promedio (h.):       |                                         |       |          |     |       |       |          |  |            |  | 0.14                                             | — | -1.23  | 0.56   | -0.86  | -1.49 | -1.79    | —      | —       | —        | —       | —     | —      | —      | —      | —     | —       | — | — | —     | —    | —    |   |      |   |
| Velocidades Promedio (m/s): |                                         |       |          |     |       |       |          |  |            |  | 36.73                                            | — | -2.82  | 2.22   | -2.82  | -0.73 | -1.59    | —      | —       | —        | —       | —     | —      | —      | —      | —     | —       | — | — | —     | —    | —    | — | 6.73 |   |
| Velocidades para Imax(m/s): |                                         |       |          |     |       |       |          |  |            |  | 26.85                                            | — | -2.28  | 1.96   | -1.63  | -0.54 | -1.42    | —      | —       | —        | —       | —     | —      | —      | —      | —     | —       | — | — | —     | —    | —    | — | —    | — |

Numero de Tormenta: 7  
 Tipo de Tormenta: 2  
 Fecha de Registro: 1983 8 30

| Hora de registro del punto indicado (h)                                    |        |        |          |       |          |            |          |         |       |
|----------------------------------------------------------------------------|--------|--------|----------|-------|----------|------------|----------|---------|-------|
| Estacion                                                                   |        |        |          |       |          |            |          |         |       |
| Puntos                                                                     | Quiló  | Obe.   | Izobamba | Tola  | Chorrera | Aeropuerto | Inaquito |         |       |
| Inicio                                                                     | 14.25  | 15.50  | 16.00    |       |          |            | 13.82    |         |       |
| A                                                                          | 15.42  | 17.50  |          |       |          |            | 15.00    |         |       |
| I. Max                                                                     | 14.98  | 15.83  | 16.50    |       |          |            | 14.45    |         |       |
| Fin                                                                        | 15.82  | 17.75  | 17.17    |       |          |            | 16.00    |         |       |
| Cuartil                                                                    | 2      | 60%    | 1        | 30%   | 4        | 80%        | 2        | 10%     |       |
| Tiempo Promedio (h.):                                                      |        |        |          |       |          |            |          |         |       |
| Velocidades Promedio (m/s):                                                |        |        |          |       |          |            |          |         |       |
| Velocidades para Imax(m/s):                                                |        |        |          |       |          |            |          |         |       |
| Intervalo de tiempo en horas necesario para el registro del punto indicado |        |        |          |       |          |            |          |         |       |
| Distancia (m.)                                                             |        |        |          |       |          |            |          |         |       |
| Obe.                                                                       | Izoba. | Chorr. | Obe.     | Tola  | Obe.     | Izob.      | Aeropu.  | Inaqui. | Tola  |
| Obe.                                                                       | Izoba. | Chorr. | Obe.     | Tola  | Obe.     | Izob.      | Aeropu.  | Inaqui. | Tola  |
| 17697                                                                      | 4034   | 11149  | 4497     | 7978  | 3903     | 10233      | 9915     | 17874   | 8609  |
| -1.25                                                                      | -1.75  | 0.33   | 0.42     | 0.53  | -2.08    | -2.08      | -1.77    | -1.81   | -1.39 |
| -2.08                                                                      | -0.85  | -1.93  | -1.54    | -2.01 | -2.04    | -2.34      | -1.63    | -3.21   | -5.78 |
| -0.85                                                                      | -1.35  | -0.18  | 0.27     | 4.55  | 2.34     | -1.77      | -1.81    | -1.39   | -     |
| -1.93                                                                      | -1.54  | -2.01  | 4.55     | 2.34  | -1.77    | -1.81      | -1.39    | -       | -     |
| -1.63                                                                      | -3.21  | -5.78  | -        | -     | -        | -          | -        | -       | -     |

**Tipo de Tormenta:** 3

**Fecha de Registro:**

1991 3 11

| Puntos                       | Hora de registro del punto indicado (h) |          |      |          |            |          |     |  |  |  | Intervalo de tiempo en horas necesario para el registro del punto indicado |        |         |        |       |         |         |         |         |         |         |         |      |        |        |        |         |       |  |
|------------------------------|-----------------------------------------|----------|------|----------|------------|----------|-----|--|--|--|----------------------------------------------------------------------------|--------|---------|--------|-------|---------|---------|---------|---------|---------|---------|---------|------|--------|--------|--------|---------|-------|--|
|                              | Estacion                                |          |      |          |            |          |     |  |  |  |                                                                            |        |         |        |       |         |         |         |         |         |         |         |      |        |        |        |         |       |  |
|                              | Quito Obs.                              | Izobamba | Tola | Chorrera | Aeropuerto | Inequito |     |  |  |  | Q. obe.                                                                    | Izoba. | Q. obe. | Chorr. | Tola  | Q. obe. | Inaqui. | Aeropu. | Q. obe. | Inaqui. | Aeropu. | Inaqui. | Tola | Chorr. | Izoba. | Chorr. | Aeropu. | Tola  |  |
| Inicio                       | 14.00                                   |          |      |          |            | 16.50    |     |  |  |  | 17.687                                                                     |        |         | 4034   | 11149 |         | 4497    | 7978    | 3863    | 10233   | 6615    | 17874   | 6600 |        |        |        |         | 12935 |  |
| A                            | 15.00                                   |          |      |          |            | 17.26    |     |  |  |  | -1.50                                                                      |        |         |        |       |         | -2.50   |         |         |         |         |         |      |        |        |        |         |       |  |
| I. Max                       | 14.21                                   |          |      |          |            | 17.00    |     |  |  |  | -2.08                                                                      |        |         |        |       |         | -2.70   |         |         |         |         |         |      |        |        |        |         |       |  |
| Fin                          | 17.50                                   |          |      |          |            | 17.58    |     |  |  |  | -0.50                                                                      |        |         |        |       |         | -0.08   |         |         |         |         |         |      |        |        |        |         |       |  |
| Guarfil                      | 1                                       | 30%      | 1    | 30%      |            | 2        | 70% |  |  |  |                                                                            |        |         |        |       |         |         |         |         |         |         |         |      |        |        |        |         |       |  |
| Tiempo Promedio (h.):        |                                         |          |      |          |            |          |     |  |  |  |                                                                            |        |         |        |       |         |         |         |         |         |         |         |      |        |        |        |         |       |  |
| Velocidades Promedio(m/s):   |                                         |          |      |          |            |          |     |  |  |  |                                                                            |        |         |        |       |         |         |         |         |         |         |         |      |        |        |        |         |       |  |
| Velocidades para I max(m/s): |                                         |          |      |          |            |          |     |  |  |  |                                                                            |        |         |        |       |         |         |         |         |         |         |         |      |        |        |        |         |       |  |

Numero de Tormenta: 3

Tipo de Tormenta: 3

Fecha de Registro: 1987 5 23

| Hora de registro del punto indicado (h) |       |     |          |      |          |            |          |     |  | Intervalo de tiempo en horas necesario para el registro del punto indicado |  |  |  |  |  |  |  |  |  |
|-----------------------------------------|-------|-----|----------|------|----------|------------|----------|-----|--|----------------------------------------------------------------------------|--|--|--|--|--|--|--|--|--|
| Estación                                |       |     |          |      |          |            |          |     |  |                                                                            |  |  |  |  |  |  |  |  |  |
| Puntos                                  | Quito |     | Izobamba | Tola | Chorrera | Aeropuerto | Inaquito |     |  |                                                                            |  |  |  |  |  |  |  |  |  |
|                                         | Obs.  |     |          |      |          |            |          |     |  |                                                                            |  |  |  |  |  |  |  |  |  |
| Inicio                                  | 14.53 |     |          |      |          |            | 14.52    |     |  |                                                                            |  |  |  |  |  |  |  |  |  |
| A                                       | 15.21 |     |          |      |          |            | 15.30    |     |  |                                                                            |  |  |  |  |  |  |  |  |  |
| I. Max                                  | 15.00 |     |          |      |          |            | 15.50    |     |  |                                                                            |  |  |  |  |  |  |  |  |  |
| Fin                                     | 15.58 |     |          |      |          |            | 15.57    |     |  |                                                                            |  |  |  |  |  |  |  |  |  |
| Cuartil                                 | 1     | 70% |          |      |          |            | 2        | 20% |  |                                                                            |  |  |  |  |  |  |  |  |  |
| Tiempo Promedio (h.):                   |       |     |          |      |          |            |          |     |  |                                                                            |  |  |  |  |  |  |  |  |  |
| Velocidades Promedio (m/s):             |       |     |          |      |          |            |          |     |  |                                                                            |  |  |  |  |  |  |  |  |  |
| Velocidades para Imax(m/s):             |       |     |          |      |          |            |          |     |  |                                                                            |  |  |  |  |  |  |  |  |  |
|                                         |       |     |          |      |          |            |          |     |  |                                                                            |  |  |  |  |  |  |  |  |  |
|                                         |       |     |          |      |          |            |          |     |  |                                                                            |  |  |  |  |  |  |  |  |  |
|                                         |       |     |          |      |          |            |          |     |  |                                                                            |  |  |  |  |  |  |  |  |  |
|                                         |       |     |          |      |          |            |          |     |  |                                                                            |  |  |  |  |  |  |  |  |  |
|                                         |       |     |          |      |          |            |          |     |  |                                                                            |  |  |  |  |  |  |  |  |  |
|                                         |       |     |          |      |          |            |          |     |  |                                                                            |  |  |  |  |  |  |  |  |  |
|                                         |       |     |          |      |          |            |          |     |  |                                                                            |  |  |  |  |  |  |  |  |  |
|                                         |       |     |          |      |          |            |          |     |  |                                                                            |  |  |  |  |  |  |  |  |  |
|                                         |       |     |          |      |          |            |          |     |  |                                                                            |  |  |  |  |  |  |  |  |  |
|                                         |       |     |          |      |          |            |          |     |  |                                                                            |  |  |  |  |  |  |  |  |  |
|                                         |       |     |          |      |          |            |          |     |  |                                                                            |  |  |  |  |  |  |  |  |  |
|                                         |       |     |          |      |          |            |          |     |  |                                                                            |  |  |  |  |  |  |  |  |  |
|                                         |       |     |          |      |          |            |          |     |  |                                                                            |  |  |  |  |  |  |  |  |  |
|                                         |       |     |          |      |          |            |          |     |  |                                                                            |  |  |  |  |  |  |  |  |  |
|                                         |       |     |          |      |          |            |          |     |  |                                                                            |  |  |  |  |  |  |  |  |  |
|                                         |       |     |          |      |          |            |          |     |  |                                                                            |  |  |  |  |  |  |  |  |  |
|                                         |       |     |          |      |          |            |          |     |  |                                                                            |  |  |  |  |  |  |  |  |  |
|                                         |       |     |          |      |          |            |          |     |  |                                                                            |  |  |  |  |  |  |  |  |  |
|                                         |       |     |          |      |          |            |          |     |  |                                                                            |  |  |  |  |  |  |  |  |  |
|                                         |       |     |          |      |          |            |          |     |  |                                                                            |  |  |  |  |  |  |  |  |  |
|                                         |       |     |          |      |          |            |          |     |  |                                                                            |  |  |  |  |  |  |  |  |  |
|                                         |       |     |          |      |          |            |          |     |  |                                                                            |  |  |  |  |  |  |  |  |  |
|                                         |       |     |          |      |          |            |          |     |  |                                                                            |  |  |  |  |  |  |  |  |  |
|                                         |       |     |          |      |          |            |          |     |  |                                                                            |  |  |  |  |  |  |  |  |  |
|                                         |       |     |          |      |          |            |          |     |  |                                                                            |  |  |  |  |  |  |  |  |  |
|                                         |       |     |          |      |          |            |          |     |  |                                                                            |  |  |  |  |  |  |  |  |  |
|                                         |       |     |          |      |          |            |          |     |  |                                                                            |  |  |  |  |  |  |  |  |  |
|                                         |       |     |          |      |          |            |          |     |  |                                                                            |  |  |  |  |  |  |  |  |  |
|                                         |       |     |          |      |          |            |          |     |  |                                                                            |  |  |  |  |  |  |  |  |  |
|                                         |       |     |          |      |          |            |          |     |  |                                                                            |  |  |  |  |  |  |  |  |  |
|                                         |       |     |          |      |          |            |          |     |  |                                                                            |  |  |  |  |  |  |  |  |  |
|                                         |       |     |          |      |          |            |          |     |  |                                                                            |  |  |  |  |  |  |  |  |  |
|                                         |       |     |          |      |          |            |          |     |  |                                                                            |  |  |  |  |  |  |  |  |  |
|                                         |       |     |          |      |          |            |          |     |  |                                                                            |  |  |  |  |  |  |  |  |  |
|                                         |       |     |          |      |          |            |          |     |  |                                                                            |  |  |  |  |  |  |  |  |  |
|                                         |       |     |          |      |          |            |          |     |  |                                                                            |  |  |  |  |  |  |  |  |  |
|                                         |       |     |          |      |          |            |          |     |  |                                                                            |  |  |  |  |  |  |  |  |  |
|                                         |       |     |          |      |          |            |          |     |  |                                                                            |  |  |  |  |  |  |  |  |  |
|                                         |       |     |          |      |          |            |          |     |  |                                                                            |  |  |  |  |  |  |  |  |  |
|                                         |       |     |          |      |          |            |          |     |  |                                                                            |  |  |  |  |  |  |  |  |  |
|                                         |       |     |          |      |          |            |          |     |  |                                                                            |  |  |  |  |  |  |  |  |  |
|                                         |       |     |          |      |          |            |          |     |  |                                                                            |  |  |  |  |  |  |  |  |  |
|                                         |       |     |          |      |          |            |          |     |  |                                                                            |  |  |  |  |  |  |  |  |  |
|                                         |       |     |          |      |          |            |          |     |  |                                                                            |  |  |  |  |  |  |  |  |  |
|                                         |       |     |          |      |          |            |          |     |  |                                                                            |  |  |  |  |  |  |  |  |  |
|                                         |       |     |          |      |          |            |          |     |  |                                                                            |  |  |  |  |  |  |  |  |  |
|                                         |       |     |          |      |          |            |          |     |  |                                                                            |  |  |  |  |  |  |  |  |  |
|                                         |       |     |          |      |          |            |          |     |  |                                                                            |  |  |  |  |  |  |  |  |  |
|                                         |       |     |          |      |          |            |          |     |  |                                                                            |  |  |  |  |  |  |  |  |  |
|                                         |       |     |          |      |          |            |          |     |  |                                                                            |  |  |  |  |  |  |  |  |  |
|                                         |       |     |          |      |          |            |          |     |  |                                                                            |  |  |  |  |  |  |  |  |  |
|                                         |       |     |          |      |          |            |          |     |  |                                                                            |  |  |  |  |  |  |  |  |  |
|                                         |       |     |          |      |          |            |          |     |  |                                                                            |  |  |  |  |  |  |  |  |  |
|                                         |       |     |          |      |          |            |          |     |  |                                                                            |  |  |  |  |  |  |  |  |  |
|                                         |       |     |          |      |          |            |          |     |  |                                                                            |  |  |  |  |  |  |  |  |  |
|                                         |       |     |          |      |          |            |          |     |  |                                                                            |  |  |  |  |  |  |  |  |  |
|                                         |       |     |          |      |          |            |          |     |  |                                                                            |  |  |  |  |  |  |  |  |  |
|                                         |       |     |          |      |          |            |          |     |  |                                                                            |  |  |  |  |  |  |  |  |  |
|                                         |       |     |          |      |          |            |          |     |  |                                                                            |  |  |  |  |  |  |  |  |  |
|                                         |       |     |          |      |          |            |          |     |  |                                                                            |  |  |  |  |  |  |  |  |  |
|                                         |       |     |          |      |          |            |          |     |  |                                                                            |  |  |  |  |  |  |  |  |  |
|                                         |       |     |          |      |          |            |          |     |  |                                                                            |  |  |  |  |  |  |  |  |  |
|                                         |       |     |          |      |          |            |          |     |  |                                                                            |  |  |  |  |  |  |  |  |  |
|                                         |       |     |          |      |          |            |          |     |  |                                                                            |  |  |  |  |  |  |  |  |  |
|                                         |       |     |          |      |          |            |          |     |  |                                                                            |  |  |  |  |  |  |  |  |  |
|                                         |       |     |          |      |          |            |          |     |  |                                                                            |  |  |  |  |  |  |  |  |  |
|                                         |       |     |          |      |          |            |          |     |  |                                                                            |  |  |  |  |  |  |  |  |  |
|                                         |       |     |          |      |          |            |          |     |  |                                                                            |  |  |  |  |  |  |  |  |  |
|                                         |       |     |          |      |          |            |          |     |  |                                                                            |  |  |  |  |  |  |  |  |  |
|                                         |       |     |          |      |          |            |          |     |  |                                                                            |  |  |  |  |  |  |  |  |  |
|                                         |       |     |          |      |          |            |          |     |  |                                                                            |  |  |  |  |  |  |  |  |  |
|                                         |       |     |          |      |          |            |          |     |  |                                                                            |  |  |  |  |  |  |  |  |  |
|                                         |       |     |          |      |          |            |          |     |  |                                                                            |  |  |  |  |  |  |  |  |  |
|                                         |       |     |          |      |          |            |          |     |  |                                                                            |  |  |  |  |  |  |  |  |  |
|                                         |       |     |          |      |          |            |          |     |  |                                                                            |  |  |  |  |  |  |  |  |  |
|                                         |       |     |          |      |          |            |          |     |  |                                                                            |  |  |  |  |  |  |  |  |  |
|                                         |       |     |          |      |          |            |          |     |  |                                                                            |  |  |  |  |  |  |  |  |  |
|                                         |       |     |          |      |          |            |          |     |  |                                                                            |  |  |  |  |  |  |  |  |  |
|                                         |       |     |          |      |          |            |          |     |  |                                                                            |  |  |  |  |  |  |  |  |  |
|                                         |       |     |          |      |          |            |          |     |  |                                                                            |  |  |  |  |  |  |  |  |  |
|                                         |       |     |          |      |          |            |          |     |  |                                                                            |  |  |  |  |  |  |  |  |  |
|                                         |       |     |          |      |          |            |          |     |  |                                                                            |  |  |  |  |  |  |  |  |  |
|                                         |       |     |          |      |          |            |          |     |  |                                                                            |  |  |  |  |  |  |  |  |  |
|                                         |       |     |          |      |          |            |          |     |  |                                                                            |  |  |  |  |  |  |  |  |  |
|                                         |       |     |          |      |          |            |          |     |  |                                                                            |  |  |  |  |  |  |  |  |  |
|                                         |       |     |          |      |          |            |          |     |  |                                                                            |  |  |  |  |  |  |  |  |  |
|                                         |       |     |          |      |          |            |          |     |  |                                                                            |  |  |  |  |  |  |  |  |  |
|                                         |       |     |          |      |          |            |          |     |  |                                                                            |  |  |  |  |  |  |  |  |  |
|                                         |       |     |          |      |          |            |          |     |  |                                                                            |  |  |  |  |  |  |  |  |  |
|                                         |       |     |          |      |          |            |          |     |  |                                                                            |  |  |  |  |  |  |  |  |  |
|                                         |       |     |          |      |          |            |          |     |  |                                                                            |  |  |  |  |  |  |  |  |  |
|                                         |       |     |          |      |          |            |          |     |  |                                                                            |  |  |  |  |  |  |  |  |  |
|                                         |       |     |          |      |          |            |          |     |  |                                                                            |  |  |  |  |  |  |  |  |  |
|                                         |       |     |          |      |          |            |          |     |  |                                                                            |  |  |  |  |  |  |  |  |  |
|                                         |       |     |          |      |          |            |          |     |  |                                                                            |  |  |  |  |  |  |  |  |  |
|                                         |       |     |          |      |          |            |          |     |  |                                                                            |  |  |  |  |  |  |  |  |  |
|                                         |       |     |          |      |          |            |          |     |  |                                                                            |  |  |  |  |  |  |  |  |  |
|                                         |       |     |          |      |          |            |          |     |  |                                                                            |  |  |  |  |  |  |  |  |  |
|                                         |       |     |          |      |          |            |          |     |  |                                                                            |  |  |  |  |  |  |  |  |  |
|                                         |       |     |          |      |          |            |          |     |  |                                                                            |  |  |  |  |  |  |  |  |  |
|                                         |       |     |          |      |          |            |          |     |  |                                                                            |  |  |  |  |  |  |  |  |  |
|                                         |       |     |          |      |          |            |          |     |  |                                                                            |  |  |  |  |  |  |  |  |  |
|                                         |       |     |          |      |          |            |          |     |  |                                                                            |  |  |  |  |  |  |  |  |  |
|                                         |       |     |          |      |          |            |          |     |  |                                                                            |  |  |  |  |  |  |  |  |  |
|                                         |       |     |          |      |          |            |          |     |  |                                                                            |  |  |  |  |  |  |  |  |  |
|                                         |       |     |          |      |          |            |          |     |  |                                                                            |  |  |  |  |  |  |  |  |  |
|                                         |       |     |          |      |          |            |          |     |  |                                                                            |  |  |  |  |  |  |  |  |  |
|                                         |       |     |          |      |          |            |          |     |  |                                                                            |  |  |  |  |  |  |  |  |  |
|                                         |       |     |          |      |          |            |          |     |  |                                                                            |  |  |  |  |  |  |  |  |  |
|                                         |       |     |          |      |          |            |          |     |  |                                                                            |  |  |  |  |  |  |  |  |  |
|                                         |       |     |          |      |          |            |          |     |  |                                                                            |  |  |  |  |  |  |  |  |  |
|                                         |       |     |          |      |          |            |          |     |  |                                                                            |  |  |  |  |  |  |  |  |  |
|                                         |       |     |          |      |          |            |          |     |  |                                                                            |  |  |  |  |  |  |  |  |  |
|                                         |       |     |          |      |          |            |          |     |  |                                                                            |  |  |  |  |  |  |  |  |  |
|                                         |       |     |          |      |          |            |          |     |  |                                                                            |  |  |  |  |  |  |  |  |  |
|                                         |       |     |          |      |          |            |          |     |  |                                                                            |  |  |  |  |  |  |  |  |  |
|                                         |       |     |          |      |          |            |          |     |  |                                                                            |  |  |  |  |  |  |  |  |  |
|                                         |       |     |          |      |          |            |          |     |  |                                                                            |  |  |  |  |  |  |  |  |  |
|                                         |       |     |          |      |          |            |          |     |  |                                                                            |  |  |  |  |  |  |  |  |  |
|                                         |       |     |          |      |          |            |          |     |  |                                                                            |  |  |  |  |  |  |  |  |  |
|                                         |       |     |          |      |          |            |          |     |  |                                                                            |  |  |  |  |  |  |  |  |  |
|                                         |       |     |          |      |          |            |          |     |  |                                                                            |  |  |  |  |  |  |  |  |  |
|                                         |       |     |          |      |          |            |          |     |  |                                                                            |  |  |  |  |  |  |  |  |  |
|                                         |       |     |          |      |          |            |          |     |  |                                                                            |  |  |  |  |  |  |  |  |  |
|                                         |       |     |          |      |          |            |          |     |  |                                                                            |  |  |  |  |  |  |  |  |  |
|                                         |       |     |          |      |          |            |          |     |  |                                                                            |  |  |  |  |  |  |  |  |  |
|                                         |       |     |          |      |          |            |          |     |  |                                                                            |  |  |  |  |  |  |  |  |  |
|                                         |       |     |          |      |          |            |          |     |  |                                                                            |  |  |  |  |  |  |  |  |  |
|                                         |       |     |          |      |          |            |          |     |  |                                                                            |  |  |  |  |  |  |  |  |  |
|                                         |       |     |          |      |          |            |          |     |  |                                                                            |  |  |  |  |  |  |  |  |  |
|                                         |       |     |          |      |          |            |          |     |  |                                                                            |  |  |  |  |  |  |  |  |  |
|                                         |       |     |          |      |          |            |          |     |  |                                                                            |  |  |  |  |  |  |  |  |  |
|                                         |       |     |          |      |          |            |          |     |  |                                                                            |  |  |  |  |  |  |  |  |  |
|                                         |       |     |          |      |          |            |          |     |  |                                                                            |  |  |  |  |  |  |  |  |  |
|                                         |       |     |          |      |          |            |          |     |  |                                                                            |  |  |  |  |  |  |  |  |  |
|                                         |       |     |          |      |          |            |          |     |  |                                                                            |  |  |  |  |  |  |  |  |  |
|                                         |       |     |          |      |          |            |          |     |  |                                                                            |  |  |  |  |  |  |  |  |  |
|                                         |       |     |          |      |          |            |          |     |  |                                                                            |  |  |  |  |  |  |  |  |  |
|                                         |       |     |          |      |          |            |          |     |  |                                                                            |  |  |  |  |  |  |  |  |  |
|                                         |       |     |          |      |          |            |          |     |  |                                                                            |  |  |  |  |  |  |  |  |  |
|                                         |       |     |          |      |          |            |          |     |  |                                                                            |  |  |  |  |  |  |  |  |  |
|                                         |       |     |          |      |          |            |          |     |  |                                                                            |  |  |  |  |  |  |  |  |  |
|                                         |       |     |          |      |          |            |          |     |  |                                                                            |  |  |  |  |  |  |  |  |  |
|                                         |       |     |          |      |          |            |          |     |  |                                                                            |  |  |  |  |  |  |  |  |  |
|                                         |       |     |          |      |          |            |          |     |  |                                                                            |  |  |  |  |  |  |  |  |  |
|                                         |       |     |          |      |          |            |          |     |  |                                                                            |  |  |  |  |  |  |  |  |  |
|                                         |       |     |          |      |          |            |          |     |  |                                                                            |  |  |  |  |  |  |  |  |  |
|                                         |       |     |          |      |          |            |          |     |  |                                                                            |  |  |  |  |  |  |  |  |  |
|                                         |       |     |          |      |          |            |          |     |  |                                                                            |  |  |  |  |  |  |  |  |  |
|                                         |       |     |          |      |          |            |          |     |  |                                                                            |  |  |  |  |  |  |  |  |  |
|                                         |       |     |          |      |          |            |          |     |  |                                                                            |  |  |  |  |  |  |  |  |  |
|                                         |       |     |          |      |          |            |          |     |  |                                                                            |  |  |  |  |  |  |  |  |  |
|                                         |       |     |          |      |          |            |          |     |  |                                                                            |  |  |  |  |  |  |  |  |  |
|                                         |       |     |          |      |          |            |          |     |  |                                                                            |  |  |  |  |  |  |  |  |  |
|                                         |       |     |          |      |          |            |          |     |  |                                                                            |  |  |  |  |  |  |  |  |  |
|                                         |       |     |          |      |          |            |          |     |  |                                                                            |  |  |  |  |  |  |  |  |  |
|                                         |       |     |          |      |          |            |          |     |  |                                                                            |  |  |  |  |  |  |  |  |  |
|                                         |       |     |          |      |          |            |          |     |  |                                                                            |  |  |  |  |  |  |  |  |  |
|                                         |       |     |          |      |          |            |          |     |  |                                                                            |  |  |  |  |  |  |  |  |  |
|                                         |       |     |          |      |          |            |          |     |  |                                                                            |  |  |  |  |  |  |  |  |  |
|                                         |       |     |          |      |          |            |          |     |  |                                                                            |  |  |  |  |  |  |  |  |  |
|                                         |       |     |          |      |          |            |          |     |  |                                                                            |  |  |  |  |  |  |  |  |  |
|                                         |       |     |          |      |          |            |          |     |  |                                                                            |  |  |  |  |  |  |  |  |  |
|                                         |       |     |          |      |          |            |          |     |  |                                                                            |  |  |  |  |  |  |  |  |  |
|                                         |       |     |          |      |          |            |          |     |  |                                                                            |  |  |  |  |  |  |  |  |  |
|                                         |       |     |          |      |          |            |          |     |  |                                                                            |  |  |  |  |  |  |  |  |  |
|                                         |       |     |          |      |          |            |          |     |  |                                                                            |  |  |  |  |  |  |  |  |  |
|                                         |       |     |          |      |          |            |          |     |  |                                                                            |  |  |  |  |  |  |  |  |  |
|                                         |       |     |          |      |          |            |          |     |  |                                                                            |  |  |  |  |  |  |  |  |  |
|                                         |       |     |          |      |          |            |          |     |  |                                                                            |  |  |  |  |  |  |  |  |  |
|                                         |       |     |          |      |          |            |          |     |  |                                                                            |  |  |  |  |  |  |  |  |  |
|                                         |       |     |          |      |          |            |          |     |  |                                                                            |  |  |  |  |  |  |  |  |  |
|                                         |       |     |          |      |          |            |          |     |  |                                                                            |  |  |  |  |  |  |  |  |  |
|                                         |       |     |          |      |          |            |          |     |  |                                                                            |  |  |  |  |  |  |  |  |  |
|                                         |       |     |          |      |          |            |          |     |  |                                                                            |  |  |  |  |  |  |  |  |  |
|                                         |       |     |          |      |          |            |          |     |  |                                                                            |  |  |  |  |  |  |  |  |  |
|                                         |       |     |          |      |          |            |          |     |  |                                                                            |  |  |  |  |  |  |  |  |  |
|                                         |       |     |          |      |          |            |          |     |  |                                                                            |  |  |  |  |  |  |  |  |  |
|                                         |       |     |          |      |          |            |          |     |  |                                                                            |  |  |  |  |  |  |  |  |  |
|                                         |       |     |          |      |          |            |          |     |  |                                                                            |  |  |  |  |  |  |  |  |  |
|                                         |       |     |          |      |          |            |          |     |  |                                                                            |  |  |  |  |  |  |  |  |  |
|                                         |       |     |          |      |          |            |          |     |  |                                                                            |  |  |  |  |  |  |  |  |  |
|                                         |       |     |          |      |          |            |          |     |  |                                                                            |  |  |  |  |  |  |  |  |  |
|                                         |       |     |          |      |          |            |          |     |  |                                                                            |  |  |  |  |  |  |  |  |  |
|                                         |       |     |          |      |          |            |          |     |  |                                                                            |  |  |  |  |  |  |  |  |  |
|                                         |       |     |          |      |          |            |          |     |  |                                                                            |  |  |  |  |  |  |  |  |  |
|                                         |       |     |          |      |          |            |          |     |  |                                                                            |  |  |  |  |  |  |  |  |  |
|                                         |       |     |          |      |          |            |          |     |  |                                                                            |  |  |  |  |  |  |  |  |  |
|                                         |       |     |          |      |          |            |          |     |  |                                                                            |  |  |  |  |  |  |  |  |  |
|                                         |       |     |          |      |          |            |          |     |  |                                                                            |  |  |  |  |  |  |  |  |  |
|                                         |       |     |          |      |          |            |          |     |  |                                                                            |  |  |  |  |  |  |  |  |  |
|                                         |       |     |          |      |          |            |          |     |  |                                                                            |  |  |  |  |  |  |  |  |  |
|                                         |       |     |          |      |          |            |          |     |  |                                                                            |  |  |  |  |  |  |  |  |  |
|                                         |       |     |          |      |          |            |          |     |  |                                                                            |  |  |  |  |  |  |  |  |  |
|                                         |       |     |          |      |          |            |          |     |  |                                                                            |  |  |  |  |  |  |  |  |  |
|                                         |       |     |          |      |          |            |          |     |  |                                                                            |  |  |  |  |  |  |  |  |  |
|                                         |       |     |          |      |          |            |          |     |  |                                                                            |  |  |  |  |  |  |  |  |  |
|                                         |       |     |          |      |          |            |          |     |  |                                                                            |  |  |  |  |  |  |  |  |  |
| </                                      |       |     |          |      |          |            |          |     |  |                                                                            |  |  |  |  |  |  |  |  |  |

Nota: Punto A, escogido del diagrama adimensional cuando el 50% de la duración ha transcurrido

Numero de Tormenta: 4

Tipo de Tormenta: 3

Fecha de Registro: 1987 5 22

| Hora de registro del punto indicado (h) |  |                             |          |        |          |            |          |       |  | Intervalo de tiempo en horas necesario para el registro del punto indicado |  |  |   |     |  |  |  |  |  |  |
|-----------------------------------------|--|-----------------------------|----------|--------|----------|------------|----------|-------|--|----------------------------------------------------------------------------|--|--|---|-----|--|--|--|--|--|--|
| Puntos                                  |  | Estación                    |          |        |          |            |          |       |  |                                                                            |  |  |   |     |  |  |  |  |  |  |
|                                         |  | Quito Obs.                  | Izobamba | Tola   | Chorrera | Aeropuerto | Inaquito |       |  |                                                                            |  |  |   |     |  |  |  |  |  |  |
| Inicio                                  |  | 15.53                       | 17.00    | 20.53  |          |            |          | 18.58 |  |                                                                            |  |  |   |     |  |  |  |  |  |  |
| A                                       |  | 16.208                      | 17.997   | 21.00  |          |            |          | 18.57 |  |                                                                            |  |  |   |     |  |  |  |  |  |  |
| B                                       |  | 18.833                      | 19.85    | 23.167 |          |            |          | 19.42 |  |                                                                            |  |  |   |     |  |  |  |  |  |  |
| C                                       |  | 19.75                       | 20.8     | 23.917 |          |            |          | 19.79 |  |                                                                            |  |  |   |     |  |  |  |  |  |  |
| D                                       |  | 22.25                       | 23.41    | 28.17  |          |            |          | 22.48 |  |                                                                            |  |  |   |     |  |  |  |  |  |  |
| I. Mex                                  |  | 23.46                       | 24.86    | 28.83  |          |            |          | 23.50 |  |                                                                            |  |  |   |     |  |  |  |  |  |  |
| Fin                                     |  | 26.00                       | 26.50    | 30.00  |          |            |          | 26.57 |  |                                                                            |  |  |   |     |  |  |  |  |  |  |
| Cuartil                                 |  | 4                           | 20%      | 4      | 10%      | 4          | 80%      |       |  |                                                                            |  |  | 4 | 10% |  |  |  |  |  |  |
|                                         |  | Tiempo Promedio (h.):       |          |        |          |            |          |       |  |                                                                            |  |  |   |     |  |  |  |  |  |  |
|                                         |  | Velocidades Promedio(m/s):  |          |        |          |            |          |       |  |                                                                            |  |  |   |     |  |  |  |  |  |  |
|                                         |  | Velocidades para Imax(m/s): |          |        |          |            |          |       |  |                                                                            |  |  |   |     |  |  |  |  |  |  |
|                                         |  |                             |          |        |          |            |          |       |  |                                                                            |  |  |   |     |  |  |  |  |  |  |

| G.Oba. |  | G.Oba. |  | G.Oba. |  | G.Oba. |  | G.Oba. |  | G.Oba. |  | G.Oba. |  | G.Oba. |  | G.Oba. |  | G.Oba. |  | G.Oba. |  | G.Oba. |  | G.Oba. |  | G.Oba. |  | G.Oba. |  | G.Oba. |  | G.Oba. |  | G.Oba. |  | G.Oba. |  | G.Oba. |  | G.Oba. |  | G.Oba. |  | G.Oba. |  | G.Oba. |  | G.Oba. |  | G.Oba. |  | G.Oba. |  | G.Oba. |  | G.Oba. |  | G.Oba. |  | G.Oba. |  | G.Oba. |  | G.Oba. |  | G.Oba. |  | G.Oba. |  | G.Oba. |  | G.Oba. |  | G.Oba. |  | G.Oba. |  | G.Oba. |  | G.Oba. |  | G.Oba. |  | G.Oba. |  | G.Oba. |  | G.Oba. |  | G.Oba. |  | G.Oba. |  | G.Oba. |  | G.Oba. |  | G.Oba. |  | G.Oba. |  | G.Oba. |  | G.Oba. |  | G.Oba. |  | G.Oba. |  | G.Oba. |  | G.Oba. |  | G.Oba. |  | G.Oba. |  | G.Oba. |  | G.Oba. |  | G.Oba. |  | G.Oba. |  | G.Oba. |  | G.Oba. |  | G.Oba. |  | G.Oba. |  | G.Oba. |  | G.Oba. |  | G.Oba. |  | G.Oba. |  | G.Oba. |  | G.Oba. |  | G.Oba. |  | G.Oba. |  | G.Oba. |  | G.Oba. |  | G.Oba. |  | G.Oba. |  | G.Oba. |  | G.Oba. |  | G.Oba. |  | G.Oba. |  | G.Oba. |  | G.Oba. |  | G.Oba. |  | G.Oba. |  | G.Oba. |  | G.Oba. |  | G.Oba. |  | G.Oba. |  | G.Oba. |  | G.Oba. |  | G.Oba. |  | G.Oba. |  | G.Oba. |  | G.Oba. |  | G.Oba. |  | G.Oba. |  | G.Oba. |  | G.Oba. |  | G.Oba. |  | G.Oba. |  | G.Oba. |  | G.Oba. |  | G.Oba. |  | G.Oba. |  | G.Oba. |  | G.Oba. |  | G.Oba. |  | G.Oba. |  | G.Oba. |  | G.Oba. |  | G.Oba. |  | G.Oba. |  | G.Oba. |  | G.Oba. |  | G.Oba. |  | G.Oba. |  | G.Oba. |  | G.Oba. |  | G.Oba. |  | G.Oba. |  | G.Oba. |  | G.Oba. |  | G.Oba. |  | G.Oba. |  | G.Oba. |  | G.Oba. |  | G.Oba. |  | G.Oba. |  | G.Oba. |  | G.Oba. |  | G.Oba. |  | G.Oba. |  | G.Oba. |  | G.Oba. |  | G.Oba. |  | G.Oba. |  | G.Oba. |  | G.Oba. |  | G.Oba. |  | G.Oba. |  | G.Oba. |  | G.Oba. |  | G.Oba. |  | G.Oba. |  | G.Oba. |  | G.Oba. |  | G.Oba. |  | G.Oba. |  | G.Oba. |  | G.Oba. |  | G.Oba. |  | G.Oba. |  | G.Oba. |  | G.Oba. |  | G.Oba. |  | G.Oba. |  | G.Oba. |  | G.Oba. |  | G.Oba. |  | G.Oba. |  | G.Oba. |  | G.Oba. |  | G.Oba. |  | G.Oba. |  | G.Oba. |  | G.Oba. |  | G.Oba. |  | G.Oba. |  | G.Oba. |  | G.Oba. |  | G.Oba. |  | G.Oba. |  | G.Oba. |  | G.Oba. |  | G.Oba. |  | G.Oba. |  | G.Oba. |  | G.Oba. |  | G.Oba. |  | G.Oba. |  | G.Oba. |  | G.Oba. |  | G.Oba. |  | G.Oba. |  | G.Oba. |  | G.Oba. |  | G.Oba. |  | G.Oba. |  | G.Oba. |  | G.Oba. |  | G.Oba. |  | G.Oba. |  | G.Oba. |  | G.Oba. |  | G.Oba. |  | G.Oba. |  | G.Oba. |  | G.Oba. |  | G.Oba. |  | G.Oba. |  | G.Oba. |  | G.Oba. |  | G.Oba. |  | G.Oba. |  | G.Oba. |  | G.Oba. |  | G.Oba. |  | G.Oba. |  | G.Oba. |  | G.Oba. |  | G.Oba. |  | G.Oba. |  | G.Oba. |  | G.Oba. |  | G.Oba. |  | G.Oba. |  | G.Oba. |  | G.Oba. |  | G.Oba. |  | G.Oba. |  | G.Oba. |  | G.Oba. |  | G.Oba. |  | G.Oba. |  | G.Oba. |  | G.Oba. |  | G.Oba. |  | G.Oba. |  | G.Oba. |  | G.Oba. |  | G.Oba. |  | G.Oba. |  | G.Oba. |  | G.Oba. |  | G.Oba. |  | G.Oba. |  | G.Oba. |  | G.Oba. |  | G.Oba. |  | G.Oba. |  | G.Oba. |  | G.Oba. |  | G.Oba. |  | G.Oba. |  | G.Oba. |  | G.Oba. |  | G.Oba. |  | G.Oba. |  | G.Oba. |  | G.Oba. |  | G.Oba. |  | G.Oba. |  | G.Oba. |  | G.Oba. |  | G.Oba. |  | G.Oba. |  | G.Oba. |  | G.Oba. |  | G.Oba. |  | G.Oba. |  | G.Oba. |  | G.Oba. |  | G.Oba. |  | G.Oba. |  | G.Oba. |  | G.Oba. |  | G.Oba. |  | G.Oba. |  | G.Oba. |  | G.Oba. |  | G.Oba. |  | G.Oba. |  | G.Oba. |  | G.Oba. |  | G.Oba. |  | G.Oba. |  | G.Oba. |  | G.Oba. |  | G.Oba. |  | G.Oba. |  | G.Oba. |  | G.Oba. |  | G.Oba. |  | G.Oba. |  | G.Oba. |  | G.Oba. |  | G.Oba. |  | G.Oba. |  | G.Oba. |  | G.Oba. |  | G.Oba. |  | G.Oba. |  | G.Oba. |  | G.Oba. |  | G.Oba. |  | G.Oba. |  | G.Oba. |  | G.Oba. |  | G.Oba. |  | G.Oba. |  | G.Oba. |  | G.Oba. |  | G.Oba. |  | G.Oba. |  | G.Oba. |  | G.Oba. |  | G.Oba. |  | G.Oba. |  | G.Oba. |  | G.Oba. |  | G.Oba. |  | G.Oba. |  | G.Oba. |  | G.Oba. |  | G.Oba. |  | G.Oba. |  | G.Oba. |  | G.Oba. |  | G.Oba. |  | G.Oba. |  | G.Oba. |  | G.Oba. |  | G.Oba. |  | G.Oba. |  | G.Oba. |  | G.Oba. |  | G.Oba. |  | G.Oba. |  | G.Oba. |  | G.Oba. |  | G.Oba. |  | G.Oba. |  | G.Oba. |  | G.Oba. |  | G.Oba. |  | G.Oba. |  | G.Oba. |  | G.Oba. |  | G.Oba. |  | G.Oba. |  | G.Oba. |  | G.Oba. |  | G.Oba. |  | G.Oba. |  | G.Oba. |  | G.Oba. |  | G.Oba. |  | G.Oba. |  | G.Oba. |  | G.Oba. |  | G.Oba. |  | G.Oba. |  | G.Oba. |  | G.Oba. |  | G.Oba. |  | G.Oba. |  | G.Oba. |  | G.Oba. |  | G.Oba. |  | G.Oba. |  | G.Oba. |  | G.Oba. |  | G.Oba. |  |
|--------|--|--------|--|--------|--|--------|--|--------|--|--------|--|--------|--|--------|--|--------|--|--------|--|--------|--|--------|--|--------|--|--------|--|--------|--|--------|--|--------|--|--------|--|--------|--|--------|--|--------|--|--------|--|--------|--|--------|--|--------|--|--------|--|--------|--|--------|--|--------|--|--------|--|--------|--|--------|--|--------|--|--------|--|--------|--|--------|--|--------|--|--------|--|--------|--|--------|--|--------|--|--------|--|--------|--|--------|--|--------|--|--------|--|--------|--|--------|--|--------|--|--------|--|--------|--|--------|--|--------|--|--------|--|--------|--|--------|--|--------|--|--------|--|--------|--|--------|--|--------|--|--------|--|--------|--|--------|--|--------|--|--------|--|--------|--|--------|--|--------|--|--------|--|--------|--|--------|--|--------|--|--------|--|--------|--|--------|--|--------|--|--------|--|--------|--|--------|--|--------|--|--------|--|--------|--|--------|--|--------|--|--------|--|--------|--|--------|--|--------|--|--------|--|--------|--|--------|--|--------|--|--------|--|--------|--|--------|--|--------|--|--------|--|--------|--|--------|--|--------|--|--------|--|--------|--|--------|--|--------|--|--------|--|--------|--|--------|--|--------|--|--------|--|--------|--|--------|--|--------|--|--------|--|--------|--|--------|--|--------|--|--------|--|--------|--|--------|--|--------|--|--------|--|--------|--|--------|--|--------|--|--------|--|--------|--|--------|--|--------|--|--------|--|--------|--|--------|--|--------|--|--------|--|--------|--|--------|--|--------|--|--------|--|--------|--|--------|--|--------|--|--------|--|--------|--|--------|--|--------|--|--------|--|--------|--|--------|--|--------|--|--------|--|--------|--|--------|--|--------|--|--------|--|--------|--|--------|--|--------|--|--------|--|--------|--|--------|--|--------|--|--------|--|--------|--|--------|--|--------|--|--------|--|--------|--|--------|--|--------|--|--------|--|--------|--|--------|--|--------|--|--------|--|--------|--|--------|--|--------|--|--------|--|--------|--|--------|--|--------|--|--------|--|--------|--|--------|--|--------|--|--------|--|--------|--|--------|--|--------|--|--------|--|--------|--|--------|--|--------|--|--------|--|--------|--|--------|--|--------|--|--------|--|--------|--|--------|--|--------|--|--------|--|--------|--|--------|--|--------|--|--------|--|--------|--|--------|--|--------|--|--------|--|--------|--|--------|--|--------|--|--------|--|--------|--|--------|--|--------|--|--------|--|--------|--|--------|--|--------|--|--------|--|--------|--|--------|--|--------|--|--------|--|--------|--|--------|--|--------|--|--------|--|--------|--|--------|--|--------|--|--------|--|--------|--|--------|--|--------|--|--------|--|--------|--|--------|--|--------|--|--------|--|--------|--|--------|--|--------|--|--------|--|--------|--|--------|--|--------|--|--------|--|--------|--|--------|--|--------|--|--------|--|--------|--|--------|--|--------|--|--------|--|--------|--|--------|--|--------|--|--------|--|--------|--|--------|--|--------|--|--------|--|--------|--|--------|--|--------|--|--------|--|--------|--|--------|--|--------|--|--------|--|--------|--|--------|--|--------|--|--------|--|--------|--|--------|--|--------|--|--------|--|--------|--|--------|--|--------|--|--------|--|--------|--|--------|--|--------|--|--------|--|--------|--|--------|--|--------|--|--------|--|--------|--|--------|--|--------|--|--------|--|--------|--|--------|--|--------|--|--------|--|--------|--|--------|--|--------|--|--------|--|--------|--|--------|--|--------|--|--------|--|--------|--|--------|--|--------|--|--------|--|--------|--|--------|--|--------|--|--------|--|--------|--|--------|--|--------|--|--------|--|--------|--|--------|--|--------|--|--------|--|--------|--|--------|--|--------|--|--------|--|--------|--|--------|--|--------|--|--------|--|--------|--|--------|--|--------|--|--------|--|--------|--|--------|--|--------|--|--------|--|--------|--|--------|--|--------|--|--------|--|--------|--|--------|--|--------|--|--------|--|--------|--|--------|--|--------|--|--------|--|--------|--|--------|--|--------|--|--------|--|--------|--|--------|--|--------|--|--------|--|--------|--|--------|--|--------|--|--------|--|
|--------|--|--------|--|--------|--|--------|--|--------|--|--------|--|--------|--|--------|--|--------|--|--------|--|--------|--|--------|--|--------|--|--------|--|--------|--|--------|--|--------|--|--------|--|--------|--|--------|--|--------|--|--------|--|--------|--|--------|--|--------|--|--------|--|--------|--|--------|--|--------|--|--------|--|--------|--|--------|--|--------|--|--------|--|--------|--|--------|--|--------|--|--------|--|--------|--|--------|--|--------|--|--------|--|--------|--|--------|--|--------|--|--------|--|--------|--|--------|--|--------|--|--------|--|--------|--|--------|--|--------|--|--------|--|--------|--|--------|--|--------|--|--------|--|--------|--|--------|--|--------|--|--------|--|--------|--|--------|--|--------|--|--------|--|--------|--|--------|--|--------|--|--------|--|--------|--|--------|--|--------|--|--------|--|--------|--|--------|--|--------|--|--------|--|--------|--|--------|--|--------|--|--------|--|--------|--|--------|--|--------|--|--------|--|--------|--|--------|--|--------|--|--------|--|--------|--|--------|--|--------|--|--------|--|--------|--|--------|--|--------|--|--------|--|--------|--|--------|--|--------|--|--------|--|--------|--|--------|--|--------|--|--------|--|--------|--|--------|--|--------|--|--------|--|--------|--|--------|--|--------|--|--------|--|--------|--|--------|--|--------|--|--------|--|--------|--|--------|--|--------|--|--------|--|--------|--|--------|--|--------|--|--------|--|--------|--|--------|--|--------|--|--------|--|--------|--|--------|--|--------|--|--------|--|--------|--|--------|--|--------|--|--------|--|--------|--|--------|--|--------|--|--------|--|--------|--|--------|--|--------|--|--------|--|--------|--|--------|--|--------|--|--------|--|--------|--|--------|--|--------|--|--------|--|--------|--|--------|--|--------|--|--------|--|--------|--|--------|--|--------|--|--------|--|--------|--|--------|--|--------|--|--------|--|--------|--|--------|--|--------|--|--------|--|--------|--|--------|--|--------|--|--------|--|--------|--|--------|--|--------|--|--------|--|--------|--|--------|--|--------|--|--------|--|--------|--|--------|--|--------|--|--------|--|--------|--|--------|--|--------|--|--------|--|--------|--|--------|--|--------|--|--------|--|--------|--|--------|--|--------|--|--------|--|--------|--|--------|--|--------|--|--------|--|--------|--|--------|--|--------|--|--------|--|--------|--|--------|--|--------|--|--------|--|--------|--|--------|--|--------|--|--------|--|--------|--|--------|--|--------|--|--------|--|--------|--|--------|--|--------|--|--------|--|--------|--|--------|--|--------|--|--------|--|--------|--|--------|--|--------|--|--------|--|--------|--|--------|--|--------|--|--------|--|--------|--|--------|--|--------|--|--------|--|--------|--|--------|--|--------|--|--------|--|--------|--|--------|--|--------|--|--------|--|--------|--|--------|--|--------|--|--------|--|--------|--|--------|--|--------|--|--------|--|--------|--|--------|--|--------|--|--------|--|--------|--|--------|--|--------|--|--------|--|--------|--|--------|--|--------|--|--------|--|--------|--|--------|--|--------|--|--------|--|--------|--|--------|--|--------|--|--------|--|--------|--|--------|--|--------|--|--------|--|--------|--|--------|--|--------|--|--------|--|--------|--|--------|--|--------|--|--------|--|--------|--|--------|--|--------|--|--------|--|--------|--|--------|--|--------|--|--------|--|--------|--|--------|--|--------|--|--------|--|--------|--|--------|--|--------|--|--------|--|--------|--|--------|--|--------|--|--------|--|--------|--|--------|--|--------|--|--------|--|--------|--|--------|--|--------|--|--------|--|--------|--|--------|--|--------|--|--------|--|--------|--|--------|--|--------|--|--------|--|--------|--|--------|--|--------|--|--------|--|--------|--|--------|--|--------|--|--------|--|--------|--|--------|--|--------|--|--------|--|--------|--|--------|--|--------|--|--------|--|--------|--|--------|--|--------|--|--------|--|--------|--|--------|--|--------|--|--------|--|--------|--|--------|--|--------|--|--------|--|--------|--|--------|--|--------|--|--------|--|--------|--|--------|--|--------|--|--------|--|--------|--|--------|--|--------|--|--------|--|--------|--|--------|--|--------|--|--------|--|

|                     |      |
|---------------------|------|
| Numero de Tormenta: | 5    |
| Tipo de Tormenta:   | 3    |
| Fecha de Registro:  | 1993 |

[illegible]

|                     |      |
|---------------------|------|
| Numero de Tormenta: | 6    |
| Tipo de Tormenta:   | 3    |
| Fecha de Registro:  | 1994 |

[illegible]

Numero de Tormenta: 7  
 Tipo de Tormenta: 3  
 Fecha de Registro: 1983 5 24

| Puntos | Hora de registro del punto indicado (h) |          |      |          |            |          |                             |        |       |        | Intervalo de tiempo en horas necesario para el registro del punto indicado |         |         |      |        |        |         |         |      |        |        |         |
|--------|-----------------------------------------|----------|------|----------|------------|----------|-----------------------------|--------|-------|--------|----------------------------------------------------------------------------|---------|---------|------|--------|--------|---------|---------|------|--------|--------|---------|
|        | Estacion                                |          |      |          |            |          |                             |        |       |        |                                                                            |         |         |      |        |        |         |         |      |        |        |         |
|        | Quito<br>Obs.                           | Izobamba | Tola | Chorrera | Aeropuerto | Inequito | Distancia (m.)              |        |       |        |                                                                            |         |         |      |        |        |         |         |      |        |        |         |
|        |                                         |          |      |          |            |          | Q.Oba.                      | Chorr. | Tola  | Q.Oba. | Izob.                                                                      | Aeropu. | Inequi. | Tola | Chorr. | Izoba. | Aeropu. | Inequi. | Tola | Chorr. | Izoba. | Aeropu. |
|        |                                         |          |      |          |            |          | 17087                       | 4034   | 11149 | 4497   | 7978                                                                       | 3983    | 10233   | 6615 | 17874  | 8009   | 12036   |         |      |        |        |         |
|        |                                         |          |      |          |            |          | -0.88                       |        | 0.00  | -0.75  |                                                                            |         | 0.75    |      |        |        |         |         |      |        |        |         |
|        |                                         |          |      |          |            |          | -0.75                       |        | 0.92  | -0.42  |                                                                            |         | 1.34    |      |        |        |         |         |      |        |        |         |
|        |                                         |          |      |          |            |          | -0.33                       |        | 0.25  | -0.42  |                                                                            |         | 0.67    |      |        |        |         |         |      |        |        |         |
|        |                                         |          |      |          |            |          | -0.97                       |        | 0.83  | -2.17  |                                                                            |         | 3.00    |      |        |        |         |         |      |        |        |         |
|        |                                         |          |      |          |            |          |                             |        |       |        |                                                                            |         |         |      |        |        |         |         |      |        |        |         |
|        |                                         |          |      |          |            |          | -0.65                       | ---    | 0.67  | -0.94  | ---                                                                        | ---     | 1.44    | ---  | ---    | ---    | ---     | ---     | ---  |        |        |         |
|        |                                         |          |      |          |            |          | -7.48                       | ---    | 4.65  | -1.33  | ---                                                                        | ---     | 1.68    | ---  | ---    | ---    | ---     | ---     | ---  |        |        |         |
|        |                                         |          |      |          |            |          | -16.12                      | ---    | 12.39 | -2.90  | ---                                                                        | ---     | 4.28    | ---  | ---    | ---    | ---     | ---     | ---  |        |        |         |
|        |                                         |          |      |          |            |          | Velocidades para lmax(m/s): |        |       |        |                                                                            |         |         |      |        |        |         |         |      |        |        |         |
|        |                                         |          |      |          |            |          |                             |        |       |        |                                                                            |         |         |      |        |        |         |         |      |        |        |         |

Nota: Por precipitación baja en estación Tola, se considera el movimiento principal en las otras estaciones

Numero de Tormenta: 8  
 Tipo de Tormenta: 3  
 Fecha de Registro: 1982 11 19

|        |             | Hora de registro del punto indicado (h) |  |      |  |          |  |            |  |          |  | Intervalo de tiempo en horas necesario para el registro del punto indicado |        |      |          |          |          |      |        |        |          |          |      |        |        |          |          |      |        |        |          |          |      |        |        |          |          |      |        |        |          |          |      |        |        |          |          |      |        |        |          |          |      |        |        |          |          |      |        |        |          |          |      |        |        |          |          |      |        |        |          |          |      |        |        |          |          |      |        |        |          |          |      |        |        |          |          |      |        |        |          |          |      |        |        |          |          |      |        |        |          |          |      |        |        |          |          |      |        |        |          |          |      |        |        |          |          |      |        |        |          |          |      |        |        |          |          |      |        |        |          |          |      |        |        |          |          |      |        |        |          |          |      |        |        |          |          |      |        |        |          |          |      |        |        |          |          |      |        |        |          |          |      |        |        |          |          |      |        |        |          |          |      |        |        |          |          |      |        |        |          |          |      |        |        |          |          |      |        |        |          |          |      |        |        |          |          |      |        |        |          |          |      |        |        |          |          |      |        |        |          |          |      |        |        |          |          |      |        |        |          |          |      |        |        |          |          |      |        |        |          |          |      |        |        |          |          |      |        |        |          |          |      |        |        |          |          |      |        |        |          |          |      |        |        |          |          |      |        |        |          |          |      |        |        |          |          |      |        |        |          |          |      |        |        |          |          |      |        |        |          |          |      |        |        |          |          |      |        |        |          |          |      |        |        |          |          |      |        |        |          |          |      |        |        |          |          |      |        |        |          |          |      |        |        |          |          |      |        |        |          |          |      |        |        |          |          |      |        |        |          |          |      |        |        |          |          |      |        |        |          |          |      |        |        |          |          |      |        |        |          |          |      |        |        |          |          |      |        |        |          |          |      |        |        |          |          |      |        |        |          |          |      |        |        |          |          |      |        |        |          |          |      |        |        |          |          |      |        |        |          |          |      |        |        |          |          |      |        |        |          |          |      |        |        |          |          |      |        |        |          |          |      |        |        |          |          |      |        |        |          |          |      |        |        |          |          |      |        |        |          |          |      |        |        |          |          |      |        |        |          |          |      |        |        |          |          |      |        |        |          |          |      |        |        |          |          |      |        |        |          |          |      |        |        |          |          |      |        |        |          |          |      |        |        |          |          |      |        |        |          |          |      |        |        |          |          |      |        |        |          |          |      |        |        |          |          |      |        |        |          |          |      |        |        |          |          |      |        |        |          |          |      |        |        |          |          |      |        |        |          |          |      |        |        |          |          |      |        |        |          |          |      |        |        |          |          |      |        |        |          |          |      |        |        |          |          |      |        |        |          |          |      |        |        |          |          |      |        |        |          |          |      |        |        |          |          |      |        |        |          |          |      |        |        |          |          |      |        |        |          |          |      |        |        |          |          |      |        |        |          |          |      |        |        |          |          |      |        |        |          |          |      |        |        |          |          |      |        |        |          |          |      |        |        |          |          |      |        |        |          |          |      |        |        |          |          |      |        |        |          |          |      |        |        |          |          |      |        |        |          |          |      |        |        |          |          |      |        |        |          |          |      |        |        |          |          |      |        |        |          |          |      |        |        |          |          |      |        |        |          |          |      |        |        |          |          |      |        |        |          |          |      |        |        |          |          |      |        |        |          |          |      |        |        |          |          |      |        |        |          |          |      |        |        |          |          |      |        |        |          |          |      |        |        |          |          |      |        |        |          |          |      |        |        |          |          |      |        |        |          |          |      |        |        |          |          |      |        |        |          |          |      |        |        |          |          |      |        |        |          |          |      |        |        |          |          |      |        |        |          |          |      |        |        |          |          |      |        |        |          |          |      |        |        |          |          |
|--------|-------------|-----------------------------------------|--|------|--|----------|--|------------|--|----------|--|----------------------------------------------------------------------------|--------|------|----------|----------|----------|------|--------|--------|----------|----------|------|--------|--------|----------|----------|------|--------|--------|----------|----------|------|--------|--------|----------|----------|------|--------|--------|----------|----------|------|--------|--------|----------|----------|------|--------|--------|----------|----------|------|--------|--------|----------|----------|------|--------|--------|----------|----------|------|--------|--------|----------|----------|------|--------|--------|----------|----------|------|--------|--------|----------|----------|------|--------|--------|----------|----------|------|--------|--------|----------|----------|------|--------|--------|----------|----------|------|--------|--------|----------|----------|------|--------|--------|----------|----------|------|--------|--------|----------|----------|------|--------|--------|----------|----------|------|--------|--------|----------|----------|------|--------|--------|----------|----------|------|--------|--------|----------|----------|------|--------|--------|----------|----------|------|--------|--------|----------|----------|------|--------|--------|----------|----------|------|--------|--------|----------|----------|------|--------|--------|----------|----------|------|--------|--------|----------|----------|------|--------|--------|----------|----------|------|--------|--------|----------|----------|------|--------|--------|----------|----------|------|--------|--------|----------|----------|------|--------|--------|----------|----------|------|--------|--------|----------|----------|------|--------|--------|----------|----------|------|--------|--------|----------|----------|------|--------|--------|----------|----------|------|--------|--------|----------|----------|------|--------|--------|----------|----------|------|--------|--------|----------|----------|------|--------|--------|----------|----------|------|--------|--------|----------|----------|------|--------|--------|----------|----------|------|--------|--------|----------|----------|------|--------|--------|----------|----------|------|--------|--------|----------|----------|------|--------|--------|----------|----------|------|--------|--------|----------|----------|------|--------|--------|----------|----------|------|--------|--------|----------|----------|------|--------|--------|----------|----------|------|--------|--------|----------|----------|------|--------|--------|----------|----------|------|--------|--------|----------|----------|------|--------|--------|----------|----------|------|--------|--------|----------|----------|------|--------|--------|----------|----------|------|--------|--------|----------|----------|------|--------|--------|----------|----------|------|--------|--------|----------|----------|------|--------|--------|----------|----------|------|--------|--------|----------|----------|------|--------|--------|----------|----------|------|--------|--------|----------|----------|------|--------|--------|----------|----------|------|--------|--------|----------|----------|------|--------|--------|----------|----------|------|--------|--------|----------|----------|------|--------|--------|----------|----------|------|--------|--------|----------|----------|------|--------|--------|----------|----------|------|--------|--------|----------|----------|------|--------|--------|----------|----------|------|--------|--------|----------|----------|------|--------|--------|----------|----------|------|--------|--------|----------|----------|------|--------|--------|----------|----------|------|--------|--------|----------|----------|------|--------|--------|----------|----------|------|--------|--------|----------|----------|------|--------|--------|----------|----------|------|--------|--------|----------|----------|------|--------|--------|----------|----------|------|--------|--------|----------|----------|------|--------|--------|----------|----------|------|--------|--------|----------|----------|------|--------|--------|----------|----------|------|--------|--------|----------|----------|------|--------|--------|----------|----------|------|--------|--------|----------|----------|------|--------|--------|----------|----------|------|--------|--------|----------|----------|------|--------|--------|----------|----------|------|--------|--------|----------|----------|------|--------|--------|----------|----------|------|--------|--------|----------|----------|------|--------|--------|----------|----------|------|--------|--------|----------|----------|------|--------|--------|----------|----------|------|--------|--------|----------|----------|------|--------|--------|----------|----------|------|--------|--------|----------|----------|------|--------|--------|----------|----------|------|--------|--------|----------|----------|------|--------|--------|----------|----------|------|--------|--------|----------|----------|------|--------|--------|----------|----------|------|--------|--------|----------|----------|------|--------|--------|----------|----------|------|--------|--------|----------|----------|------|--------|--------|----------|----------|------|--------|--------|----------|----------|------|--------|--------|----------|----------|------|--------|--------|----------|----------|------|--------|--------|----------|----------|------|--------|--------|----------|----------|------|--------|--------|----------|----------|------|--------|--------|----------|----------|------|--------|--------|----------|----------|------|--------|--------|----------|----------|------|--------|--------|----------|----------|------|--------|--------|----------|----------|------|--------|--------|----------|----------|------|--------|--------|----------|----------|------|--------|--------|----------|----------|------|--------|--------|----------|----------|------|--------|--------|----------|----------|------|--------|--------|----------|----------|------|--------|--------|----------|----------|------|--------|--------|----------|----------|------|--------|--------|----------|----------|------|--------|--------|----------|----------|------|--------|--------|----------|----------|------|--------|--------|----------|----------|------|--------|--------|----------|----------|------|--------|--------|----------|----------|------|--------|--------|----------|----------|------|--------|--------|----------|----------|------|--------|--------|----------|----------|------|--------|--------|----------|----------|------|--------|--------|----------|----------|------|--------|--------|----------|----------|------|--------|--------|----------|----------|------|--------|--------|----------|----------|------|--------|--------|----------|----------|------|--------|--------|----------|----------|------|--------|--------|----------|----------|------|--------|--------|----------|----------|------|--------|--------|----------|----------|------|--------|--------|----------|----------|------|--------|--------|----------|----------|------|--------|--------|----------|----------|
|        |             | Estacion                                |  |      |  |          |  |            |  |          |  |                                                                            |        |      |          |          |          |      |        |        |          |          |      |        |        |          |          |      |        |        |          |          |      |        |        |          |          |      |        |        |          |          |      |        |        |          |          |      |        |        |          |          |      |        |        |          |          |      |        |        |          |          |      |        |        |          |          |      |        |        |          |          |      |        |        |          |          |      |        |        |          |          |      |        |        |          |          |      |        |        |          |          |      |        |        |          |          |      |        |        |          |          |      |        |        |          |          |      |        |        |          |          |      |        |        |          |          |      |        |        |          |          |      |        |        |          |          |      |        |        |          |          |      |        |        |          |          |      |        |        |          |          |      |        |        |          |          |      |        |        |          |          |      |        |        |          |          |      |        |        |          |          |      |        |        |          |          |      |        |        |          |          |      |        |        |          |          |      |        |        |          |          |      |        |        |          |          |      |        |        |          |          |      |        |        |          |          |      |        |        |          |          |      |        |        |          |          |      |        |        |          |          |      |        |        |          |          |      |        |        |          |          |      |        |        |          |          |      |        |        |          |          |      |        |        |          |          |      |        |        |          |          |      |        |        |          |          |      |        |        |          |          |      |        |        |          |          |      |        |        |          |          |      |        |        |          |          |      |        |        |          |          |      |        |        |          |          |      |        |        |          |          |      |        |        |          |          |      |        |        |          |          |      |        |        |          |          |      |        |        |          |          |      |        |        |          |          |      |        |        |          |          |      |        |        |          |          |      |        |        |          |          |      |        |        |          |          |      |        |        |          |          |      |        |        |          |          |      |        |        |          |          |      |        |        |          |          |      |        |        |          |          |      |        |        |          |          |      |        |        |          |          |      |        |        |          |          |      |        |        |          |          |      |        |        |          |          |      |        |        |          |          |      |        |        |          |          |      |        |        |          |          |      |        |        |          |          |      |        |        |          |          |      |        |        |          |          |      |        |        |          |          |      |        |        |          |          |      |        |        |          |          |      |        |        |          |          |      |        |        |          |          |      |        |        |          |          |      |        |        |          |          |      |        |        |          |          |      |        |        |          |          |      |        |        |          |          |      |        |        |          |          |      |        |        |          |          |      |        |        |          |          |      |        |        |          |          |      |        |        |          |          |      |        |        |          |          |      |        |        |          |          |      |        |        |          |          |      |        |        |          |          |      |        |        |          |          |      |        |        |          |          |      |        |        |          |          |      |        |        |          |          |      |        |        |          |          |      |        |        |          |          |      |        |        |          |          |      |        |        |          |          |      |        |        |          |          |      |        |        |          |          |      |        |        |          |          |      |        |        |          |          |      |        |        |          |          |      |        |        |          |          |      |        |        |          |          |      |        |        |          |          |      |        |        |          |          |      |        |        |          |          |      |        |        |          |          |      |        |        |          |          |      |        |        |          |          |      |        |        |          |          |      |        |        |          |          |      |        |        |          |          |      |        |        |          |          |      |        |        |          |          |      |        |        |          |          |      |        |        |          |          |      |        |        |          |          |      |        |        |          |          |      |        |        |          |          |      |        |        |          |          |      |        |        |          |          |      |        |        |          |          |      |        |        |          |          |      |        |        |          |          |      |        |        |          |          |      |        |        |          |          |      |        |        |          |          |      |        |        |          |          |      |        |        |          |          |      |        |        |          |          |      |        |        |          |          |      |        |        |          |          |      |        |        |          |          |      |        |        |          |          |      |        |        |          |          |      |        |        |          |          |      |        |        |          |          |      |        |        |          |          |      |        |        |          |          |      |        |        |          |          |      |        |        |          |          |      |        |        |          |          |      |        |        |          |          |
| Puntos | Quilbo Obe. | Izobamba                                |  | Tola |  | Chorrera |  | Aeropuerto |  | Inequito |  | Distancia (m.)                                                             |        |      |          |          |          |      |        |        |          |          |      |        |        |          |          |      |        |        |          |          |      |        |        |          |          |      |        |        |          |          |      |        |        |          |          |      |        |        |          |          |      |        |        |          |          |      |        |        |          |          |      |        |        |          |          |      |        |        |          |          |      |        |        |          |          |      |        |        |          |          |      |        |        |          |          |      |        |        |          |          |      |        |        |          |          |      |        |        |          |          |      |        |        |          |          |      |        |        |          |          |      |        |        |          |          |      |        |        |          |          |      |        |        |          |          |      |        |        |          |          |      |        |        |          |          |      |        |        |          |          |      |        |        |          |          |      |        |        |          |          |      |        |        |          |          |      |        |        |          |          |      |        |        |          |          |      |        |        |          |          |      |        |        |          |          |      |        |        |          |          |      |        |        |          |          |      |        |        |          |          |      |        |        |          |          |      |        |        |          |          |      |        |        |          |          |      |        |        |          |          |      |        |        |          |          |      |        |        |          |          |      |        |        |          |          |      |        |        |          |          |      |        |        |          |          |      |        |        |          |          |      |        |        |          |          |      |        |        |          |          |      |        |        |          |          |      |        |        |          |          |      |        |        |          |          |      |        |        |          |          |      |        |        |          |          |      |        |        |          |          |      |        |        |          |          |      |        |        |          |          |      |        |        |          |          |      |        |        |          |          |      |        |        |          |          |      |        |        |          |          |      |        |        |          |          |      |        |        |          |          |      |        |        |          |          |      |        |        |          |          |      |        |        |          |          |      |        |        |          |          |      |        |        |          |          |      |        |        |          |          |      |        |        |          |          |      |        |        |          |          |      |        |        |          |          |      |        |        |          |          |      |        |        |          |          |      |        |        |          |          |      |        |        |          |          |      |        |        |          |          |      |        |        |          |          |      |        |        |          |          |      |        |        |          |          |      |        |        |          |          |      |        |        |          |          |      |        |        |          |          |      |        |        |          |          |      |        |        |          |          |      |        |        |          |          |      |        |        |          |          |      |        |        |          |          |      |        |        |          |          |      |        |        |          |          |      |        |        |          |          |      |        |        |          |          |      |        |        |          |          |      |        |        |          |          |      |        |        |          |          |      |        |        |          |          |      |        |        |          |          |      |        |        |          |          |      |        |        |          |          |      |        |        |          |          |      |        |        |          |          |      |        |        |          |          |      |        |        |          |          |      |        |        |          |          |      |        |        |          |          |      |        |        |          |          |      |        |        |          |          |      |        |        |          |          |      |        |        |          |          |      |        |        |          |          |      |        |        |          |          |      |        |        |          |          |      |        |        |          |          |      |        |        |          |          |      |        |        |          |          |      |        |        |          |          |      |        |        |          |          |      |        |        |          |          |      |        |        |          |          |      |        |        |          |          |      |        |        |          |          |      |        |        |          |          |      |        |        |          |          |      |        |        |          |          |      |        |        |          |          |      |        |        |          |          |      |        |        |          |          |      |        |        |          |          |      |        |        |          |          |      |        |        |          |          |      |        |        |          |          |      |        |        |          |          |      |        |        |          |          |      |        |        |          |          |      |        |        |          |          |      |        |        |          |          |      |        |        |          |          |      |        |        |          |          |      |        |        |          |          |      |        |        |          |          |      |        |        |          |          |      |        |        |          |          |      |        |        |          |          |      |        |        |          |          |      |        |        |          |          |      |        |        |          |          |      |        |        |          |          |      |        |        |          |          |      |        |        |          |          |      |        |        |          |          |      |        |        |          |          |      |        |        |          |          |      |        |        |          |          |      |        |        |          |          |
|        |             |                                         |  |      |  |          |  |            |  |          |  | Q.oba.                                                                     | Chorr. | Tola | Inaquil. | Aeropuu. | Inaquil. | Tola | Chorr. | Izoba. | Aeropuu. | Inaquil. | Tola | Chorr. | Izoba. | Aeropuu. | Inaquil. | Tola | Chorr. | Izoba. | Aeropuu. | Inaquil. | Tola | Chorr. | Izoba. | Aeropuu. | Inaquil. | Tola | Chorr. | Izoba. | Aeropuu. | Inaquil. | Tola | Chorr. | Izoba. | Aeropuu. | Inaquil. | Tola | Chorr. | Izoba. | Aeropuu. | Inaquil. | Tola | Chorr. | Izoba. | Aeropuu. | Inaquil. | Tola | Chorr. | Izoba. | Aeropuu. | Inaquil. | Tola | Chorr. | Izoba. | Aeropuu. | Inaquil. | Tola | Chorr. | Izoba. | Aeropuu. | Inaquil. | Tola | Chorr. | Izoba. | Aeropuu. | Inaquil. | Tola | Chorr. | Izoba. | Aeropuu. | Inaquil. | Tola | Chorr. | Izoba. | Aeropuu. | Inaquil. | Tola | Chorr. | Izoba. | Aeropuu. | Inaquil. | Tola | Chorr. | Izoba. | Aeropuu. | Inaquil. | Tola | Chorr. | Izoba. | Aeropuu. | Inaquil. | Tola | Chorr. | Izoba. | Aeropuu. | Inaquil. | Tola | Chorr. | Izoba. | Aeropuu. | Inaquil. | Tola | Chorr. | Izoba. | Aeropuu. | Inaquil. | Tola | Chorr. | Izoba. | Aeropuu. | Inaquil. | Tola | Chorr. | Izoba. | Aeropuu. | Inaquil. | Tola | Chorr. | Izoba. | Aeropuu. | Inaquil. | Tola | Chorr. | Izoba. | Aeropuu. | Inaquil. | Tola | Chorr. | Izoba. | Aeropuu. | Inaquil. | Tola | Chorr. | Izoba. | Aeropuu. | Inaquil. | Tola | Chorr. | Izoba. | Aeropuu. | Inaquil. | Tola | Chorr. | Izoba. | Aeropuu. | Inaquil. | Tola | Chorr. | Izoba. | Aeropuu. | Inaquil. | Tola | Chorr. | Izoba. | Aeropuu. | Inaquil. | Tola | Chorr. | Izoba. | Aeropuu. | Inaquil. | Tola | Chorr. | Izoba. | Aeropuu. | Inaquil. | Tola | Chorr. | Izoba. | Aeropuu. | Inaquil. | Tola | Chorr. | Izoba. | Aeropuu. | Inaquil. | Tola | Chorr. | Izoba. | Aeropuu. | Inaquil. | Tola | Chorr. | Izoba. | Aeropuu. | Inaquil. | Tola | Chorr. | Izoba. | Aeropuu. | Inaquil. | Tola | Chorr. | Izoba. | Aeropuu. | Inaquil. | Tola | Chorr. | Izoba. | Aeropuu. | Inaquil. | Tola | Chorr. | Izoba. | Aeropuu. | Inaquil. | Tola | Chorr. | Izoba. | Aeropuu. | Inaquil. | Tola | Chorr. | Izoba. | Aeropuu. | Inaquil. | Tola | Chorr. | Izoba. | Aeropuu. | Inaquil. | Tola | Chorr. | Izoba. | Aeropuu. | Inaquil. | Tola | Chorr. | Izoba. | Aeropuu. | Inaquil. | Tola | Chorr. | Izoba. | Aeropuu. | Inaquil. | Tola | Chorr. | Izoba. | Aeropuu. | Inaquil. | Tola | Chorr. | Izoba. | Aeropuu. | Inaquil. | Tola | Chorr. | Izoba. | Aeropuu. | Inaquil. | Tola | Chorr. | Izoba. | Aeropuu. | Inaquil. | Tola | Chorr. | Izoba. | Aeropuu. | Inaquil. | Tola | Chorr. | Izoba. | Aeropuu. | Inaquil. | Tola | Chorr. | Izoba. | Aeropuu. | Inaquil. | Tola | Chorr. | Izoba. | Aeropuu. | Inaquil. | Tola | Chorr. | Izoba. | Aeropuu. | Inaquil. | Tola | Chorr. | Izoba. | Aeropuu. | Inaquil. | Tola | Chorr. | Izoba. | Aeropuu. | Inaquil. | Tola | Chorr. | Izoba. | Aeropuu. | Inaquil. | Tola | Chorr. | Izoba. | Aeropuu. | Inaquil. | Tola | Chorr. | Izoba. | Aeropuu. | Inaquil. | Tola | Chorr. | Izoba. | Aeropuu. | Inaquil. | Tola | Chorr. | Izoba. | Aeropuu. | Inaquil. | Tola | Chorr. | Izoba. | Aeropuu. | Inaquil. | Tola | Chorr. | Izoba. | Aeropuu. | Inaquil. | Tola | Chorr. | Izoba. | Aeropuu. | Inaquil. | Tola | Chorr. | Izoba. | Aeropuu. | Inaquil. | Tola | Chorr. | Izoba. | Aeropuu. | Inaquil. | Tola | Chorr. | Izoba. | Aeropuu. | Inaquil. | Tola | Chorr. | Izoba. | Aeropuu. | Inaquil. | Tola | Chorr. | Izoba. | Aeropuu. | Inaquil. | Tola | Chorr. | Izoba. | Aeropuu. | Inaquil. | Tola | Chorr. | Izoba. | Aeropuu. | Inaquil. | Tola | Chorr. | Izoba. | Aeropuu. | Inaquil. | Tola | Chorr. | Izoba. | Aeropuu. | Inaquil. | Tola | Chorr. | Izoba. | Aeropuu. | Inaquil. | Tola | Chorr. | Izoba. | Aeropuu. | Inaquil. | Tola | Chorr. | Izoba. | Aeropuu. | Inaquil. | Tola | Chorr. | Izoba. | Aeropuu. | Inaquil. | Tola | Chorr. | Izoba. | Aeropuu. | Inaquil. | Tola | Chorr. | Izoba. | Aeropuu. | Inaquil. | Tola | Chorr. | Izoba. | Aeropuu. | Inaquil. | Tola | Chorr. | Izoba. | Aeropuu. | Inaquil. | Tola | Chorr. | Izoba. | Aeropuu. | Inaquil. | Tola | Chorr. | Izoba. | Aeropuu. | Inaquil. | Tola | Chorr. | Izoba. | Aeropuu. | Inaquil. | Tola | Chorr. | Izoba. | Aeropuu. | Inaquil. | Tola | Chorr. | Izoba. | Aeropuu. | Inaquil. | Tola | Chorr. | Izoba. | Aeropuu. | Inaquil. | Tola | Chorr. | Izoba. | Aeropuu. | Inaquil. | Tola | Chorr. | Izoba. | Aeropuu. | Inaquil. | Tola | Chorr. | Izoba. | Aeropuu. | Inaquil. | Tola | Chorr. | Izoba. | Aeropuu. | Inaquil. | Tola | Chorr. | Izoba. | Aeropuu. | Inaquil. | Tola | Chorr. | Izoba. | Aeropuu. | Inaquil. | Tola | Chorr. | Izoba. | Aeropuu. | Inaquil. | Tola | Chorr. | Izoba. | Aeropuu. | Inaquil. | Tola | Chorr. | Izoba. | Aeropuu. | Inaquil. | Tola | Chorr. | Izoba. | Aeropuu. | Inaquil. | Tola | Chorr. | Izoba. | Aeropuu. | Inaquil. | Tola | Chorr. | Izoba. | Aeropuu. | Inaquil. | Tola | Chorr. | Izoba. | Aeropuu. | Inaquil. | Tola | Chorr. | Izoba. | Aeropuu. | Inaquil. | Tola | Chorr. | Izoba. | Aeropuu. | Inaquil. | Tola | Chorr. | Izoba. | Aeropuu. | Inaquil. | Tola | Chorr. | Izoba. | Aeropuu. | Inaquil. | Tola | Chorr. | Izoba. | Aeropuu. | Inaquil. | Tola | Chorr. | Izoba. | Aeropuu. | Inaquil. | Tola | Chorr. | Izoba. | Aeropuu. | Inaquil. | Tola | Chorr. | Izoba. | Aeropuu. | Inaquil. | Tola | Chorr. | Izoba. | Aeropuu. | Inaquil. | Tola | Chorr. | Izoba. | Aeropuu. | Inaquil. | Tola | Chorr. | Izoba. | Aeropuu. | Inaquil. | Tola | Chorr. | Izoba. | Aeropuu. | Inaquil. | Tola | Chorr. | Izoba. | Aeropuu. | Inaquil. | Tola | Chorr. | Izoba. | Aeropuu. | Inaquil. | Tola | Chorr. | Izoba. | Aeropuu. | Inaquil. | Tola | Chorr. | Izoba. | Aeropuu. | Inaquil. | Tola | Chorr. | Izoba. | Aeropuu. | Inaquil. | Tola | Chorr. | Izoba. | Aeropuu. | Inaquil. | Tola | Chorr. | Izoba. | Aeropuu. | Inaquil. | Tola | Chorr. | Izoba. | Aeropuu. | Inaquil. | Tola | Chorr. | Izoba. | Aeropuu. | Inaquil. | Tola | Chorr. | Izoba. | Aeropuu. | Inaquil. | Tola | Chorr. | Izoba. | Aeropuu. | Inaquil. | Tola | Chorr. | Izoba. | Aeropuu. | Inaquil. | Tola | Chorr. | Izoba. | Aeropuu. | Inaquil. | Tola | Chorr. | Izoba. | Aeropuu. | Inaquil. | Tola | Chorr. | Izoba. | Aeropuu. | Inaquil. | Tola | Chorr. | Izoba. | Aeropuu. | Inaquil. | Tola | Chorr. | Izoba. | Aeropuu. | Inaquil. | Tola | Chorr. | Izoba. | Aeropuu. | Inaquil. | Tola | Chorr. | Izoba. | Aeropuu. | Inaquil. | Tola | Chorr. | Izoba. | Aeropuu. | Inaquil. | Tola | Chorr. | Izoba. | Aeropuu. | Inaquil. | Tola | Chorr. | Izoba. | Aeropuu. | Inaquil. | Tola | Chorr. | Izoba. | Aeropuu. | Inaquil. | Tola | Chorr. | Izoba. | Aeropuu. | Inaquil. | Tola | Chorr. | Izoba. | Aeropuu. | Inaquil. | Tola | Chorr. | Izoba. | Aeropuu. | Inaquil. | Tola | Chorr. | Izoba. | Aeropuu. | Inaquil. | Tola | Chorr. | Izoba. | Aeropuu. | Inaquil. | Tola | Chorr. | Izoba. | Aeropuu. | Inaquil. | Tola | Chorr. | Izoba. | Aeropuu. | Inaquil. | Tola | Chorr. | Izoba. | Aeropuu. | Inaquil. | Tola | Chorr. | Izoba. | Aeropuu. | Inaquil. | Tola | Chorr. | Izoba. | Aeropuu. | Inaquil. | Tola | Chorr. | Izoba. | Aeropuu. | Inaquil. | Tola | Chorr. | Izoba. | Aeropuu. | Inaquil. | Tola | Chorr. | Izoba. | Aeropuu. | Inaquil. | Tola | Chorr. | Izoba. | Aeropuu. | Inaquil. | Tola | Chorr. | Izoba. | Aeropuu. | Inaquil. | Tola | Chorr. | Izoba. | Aeropuu. | Inaquil. |



|                     |           |
|---------------------|-----------|
| Numero de Tormenta: | 9         |
| Tipo de Tormenta:   | 3         |
| Fecha de Registro:  | 1982 10 4 |

[illegible]

|                     |           |
|---------------------|-----------|
| Numero de Tormenta: | 10        |
| Tipo de Tormenta:   | 3         |
| Fecha de Registro:  | 1982 9 19 |

[illegible]

**Nota:** Por precipitación baja en estación Tola, se considera el movimiento principal en las otras estaciones.



Numero de Tormenta: 1  
 Tipo de Tormenta: 4  
 Fecha de Registro: 1991 3 23

| Puntos  |  | Hora de registro del punto indicado (h) |          |       |          |            |          |       |          |      |          | Intervalo de tiempo en horas necesario para el registro del punto indicado |          |       |          |      |            |          |       |          |      |
|---------|--|-----------------------------------------|----------|-------|----------|------------|----------|-------|----------|------|----------|----------------------------------------------------------------------------|----------|-------|----------|------|------------|----------|-------|----------|------|
|         |  | Estacion                                |          |       |          |            | Estacion |       |          |      |          | Q. obs.                                                                    |          |       |          |      | Q. obs.    |          |       |          |      |
|         |  | Quito                                   | Izobamba | Tola  | Chorrera | Aeropuerto | Inequito | Quito | Izobamba | Tola | Chorrera | Aeropuerto                                                                 | Inequito | Quito | Izobamba | Tola | Aeropuerto | Inequito | Quito | Izobamba | Tola |
|         |  | Obs.                                    |          |       |          |            |          |       |          |      |          |                                                                            |          |       |          |      |            |          |       |          |      |
| Inicio  |  | 16.33                                   | 14.67    | 18.67 |          |            |          |       |          |      |          |                                                                            |          |       |          |      |            |          |       |          |      |
| I. Max  |  | 27.42                                   | 18.04    | 20.88 |          |            |          |       |          |      |          |                                                                            |          |       |          |      |            |          |       |          |      |
| Fin     |  | 29.00                                   | 29.50    | 30.00 |          |            |          |       |          |      |          |                                                                            |          |       |          |      |            |          |       |          |      |
| Cuartil |  | 4                                       | 10%      | 1     | 60%      | 1          | 80%      |       |          |      |          |                                                                            |          |       |          |      |            |          |       |          |      |
|         |  | Tiempo Promedio (h.):                   |          |       |          |            |          |       |          |      |          | Distancia (m.)                                                             |          |       |          |      |            |          |       |          |      |
|         |  | Velocidades Promedio (m/s):             |          |       |          |            |          |       |          |      |          |                                                                            |          |       |          |      |            |          |       |          |      |
|         |  | Velocidades para Imax (m/s):            |          |       |          |            |          |       |          |      |          |                                                                            |          |       |          |      |            |          |       |          |      |
|         |  | 0.43                                    |          |       |          |            |          |       |          |      |          | 0.47                                                                       |          |       |          |      |            |          |       |          |      |

Numero de Tormenta: 2  
 Tipo de Tormenta: 4  
 Fecha de Registro: 1987 5 6

| Puntos  |  | Hora de registro del punto indicado (h) |          |       |          |            |          |       |          |      |          | Velocidades de movimiento entre estaciones (m/s) |          |       |          |      |            |          |       |          |      |
|---------|--|-----------------------------------------|----------|-------|----------|------------|----------|-------|----------|------|----------|--------------------------------------------------|----------|-------|----------|------|------------|----------|-------|----------|------|
|         |  | Estacion                                |          |       |          |            | Estacion |       |          |      |          | Q. obs.                                          |          |       |          |      | Q. obs.    |          |       |          |      |
|         |  | Quito                                   | Izobamba | Tola  | Chorrera | Aeropuerto | Inequito | Quito | Izobamba | Tola | Chorrera | Aeropuerto                                       | Inequito | Quito | Izobamba | Tola | Aeropuerto | Inequito | Quito | Izobamba | Tola |
|         |  | Obs.                                    |          |       |          |            |          |       |          |      |          |                                                  |          |       |          |      |            |          |       |          |      |
| Inicio  |  | 15.07                                   | 14.12    | 13.42 |          |            | 13.37    |       |          |      |          |                                                  |          |       |          |      |            |          |       |          |      |
| I. Max  |  | 15.45                                   | 14.22    | 14.83 |          |            | 13.517   |       |          |      |          |                                                  |          |       |          |      |            |          |       |          |      |
| Fin     |  | 15.82                                   | 15.00    | 15.57 |          |            | 18.917   |       |          |      |          |                                                  |          |       |          |      |            |          |       |          |      |
| Cuartil |  | 4                                       | 10%      | 1     | 40%      | 1          | 90%      |       |          |      |          |                                                  |          |       |          |      |            |          |       |          |      |
|         |  | Tiempo Promedio (h.):                   |          |       |          |            |          |       |          |      |          | Distancia (m.)                                   |          |       |          |      |            |          |       |          |      |
|         |  | Velocidades Promedio (m/s):             |          |       |          |            |          |       |          |      |          |                                                  |          |       |          |      |            |          |       |          |      |
|         |  | Velocidades para Imax (m/s):            |          |       |          |            |          |       |          |      |          |                                                  |          |       |          |      |            |          |       |          |      |
|         |  | 4.91                                    |          |       |          |            |          |       |          |      |          | 4.52                                             |          |       |          |      |            |          |       |          |      |

|                     |            |
|---------------------|------------|
| Numero de Tormenta: | 3          |
| Tipo de Tormenta:   | 4          |
| Fecha de Registro:  | 1986 11 17 |

| Puntos |        | Hora de registro del punto indicado (h) |          |      |          |            |          |         |        |         |        | Intervalo de tiempo en horas necesario para el registro del punto indicado |        |         |        |         |        |         |        |         |        |         |        |         |        |         |        |         |        |         |        |      |  |
|--------|--------|-----------------------------------------|----------|------|----------|------------|----------|---------|--------|---------|--------|----------------------------------------------------------------------------|--------|---------|--------|---------|--------|---------|--------|---------|--------|---------|--------|---------|--------|---------|--------|---------|--------|---------|--------|------|--|
|        |        | Estación                                |          |      |          |            |          |         |        |         |        |                                                                            |        |         |        |         |        |         |        |         |        |         |        |         |        |         |        |         |        |         |        |      |  |
|        |        | Quilbo Obs.                             | Izobamba | Tola | Chorrera | Aeropuerto | Inequito | Q. Obs. | Izoba. | Q. Obs. | Chorr. | Q. Obs.                                                                    | Izoba. | Q. Obs. | Chorr. | Q. Obs. | Izoba. | Q. Obs. | Chorr. | Q. Obs. | Izoba. | Q. Obs. | Chorr. | Q. Obs. | Izoba. | Q. Obs. | Chorr. | Q. Obs. | Izoba. | Q. Obs. | Chorr. | Tola |  |
| Inicio | 16.33  | 16.22                                   | 16.85    |      | 17.08    | 16.67      | 0.12     | 0.38    | -0.34  | -0.76   | -0.41  | 0.72                                                                       |        | 17.087  | 4.034  | 11.149  | 4.497  | 7.978   | 3.983  | 1.0233  | 6.615  | 1.7874  | 8.609  | 1.2935  |        |         |        |         |        |         |        |      |  |
| A      | 17.08  | 16.83                                   | 16.20    |      | 17.87    | 17.00      | 0.43     | 0.85    | 0.06   | -0.82   | -0.87  | 0.80                                                                       |        |         |        |         |        |         |        |         |        |         |        |         |        |         |        |         |        |         |        |      |  |
| I. Max | 16.733 | 16.35                                   | 16.15    |      | 17.375   | 16.833     | 0.38     | 0.58    | -0.10  | -0.84   | -0.54  | 0.68                                                                       |        |         |        |         |        |         |        |         |        |         |        |         |        |         |        |         |        |         |        |      |  |
| Fin    | 18.00  | 17.83                                   | 17.67    |      | 18.58    | 18.00      | 0.17     | 0.33    | 0.00   | -0.58   | -0.58  | 0.33                                                                       |        |         |        |         |        |         |        |         |        |         |        |         |        |         |        |         |        |         |        |      |  |
| Guaril | 2      | 10%                                     | 1        | 20%  | 1        | 10%        | 1        | 80%     | 1      | 40%     |        |                                                                            |        |         |        |         |        |         |        |         |        |         |        |         |        |         |        |         |        |         |        |      |  |
|        |        | Tiempo Promedio (h.):                   |          |      |          |            |          |         |        |         |        |                                                                            |        |         |        |         |        |         |        |         |        |         |        |         |        |         |        |         |        |         |        |      |  |
|        |        | Velocidades Promedio (m/s):             |          |      |          |            |          |         |        |         |        |                                                                            |        |         |        |         |        |         |        |         |        |         |        |         |        |         |        |         |        |         |        |      |  |
|        |        | Velocidades para Imax(m/s):             |          |      |          |            |          |         |        |         |        |                                                                            |        |         |        |         |        |         |        |         |        |         |        |         |        |         |        |         |        |         |        |      |  |
|        |        | 12.83                                   |          |      |          |            |          |         |        |         |        | 12.83                                                                      |        |         |        |         |        |         |        |         |        |         |        |         |        |         |        |         |        |         |        |      |  |
|        |        | 18.01                                   |          |      |          |            |          |         |        |         |        | 18.01                                                                      |        |         |        |         |        |         |        |         |        |         |        |         |        |         |        |         |        |         |        |      |  |
|        |        | 0.27                                    |          |      |          |            |          |         |        |         |        | 0.27                                                                       |        |         |        |         |        |         |        |         |        |         |        |         |        |         |        |         |        |         |        |      |  |
|        |        | -1.13                                   |          |      |          |            |          |         |        |         |        | -1.13                                                                      |        |         |        |         |        |         |        |         |        |         |        |         |        |         |        |         |        |         |        |      |  |
|        |        | -1.47                                   |          |      |          |            |          |         |        |         |        | -1.47                                                                      |        |         |        |         |        |         |        |         |        |         |        |         |        |         |        |         |        |         |        |      |  |
|        |        | -1.23                                   |          |      |          |            |          |         |        |         |        | -1.23                                                                      |        |         |        |         |        |         |        |         |        |         |        |         |        |         |        |         |        |         |        |      |  |
|        |        | -0.82                                   |          |      |          |            |          |         |        |         |        | -0.82                                                                      |        |         |        |         |        |         |        |         |        |         |        |         |        |         |        |         |        |         |        |      |  |
|        |        | -1.19                                   |          |      |          |            |          |         |        |         |        | -1.19                                                                      |        |         |        |         |        |         |        |         |        |         |        |         |        |         |        |         |        |         |        |      |  |
|        |        | -3.03                                   |          |      |          |            |          |         |        |         |        | -3.03                                                                      |        |         |        |         |        |         |        |         |        |         |        |         |        |         |        |         |        |         |        |      |  |
|        |        | -2.93                                   |          |      |          |            |          |         |        |         |        | -2.93                                                                      |        |         |        |         |        |         |        |         |        |         |        |         |        |         |        |         |        |         |        |      |  |

|                     |          |
|---------------------|----------|
| Numero de Tormenta: | 4        |
| Tipo de Tormenta:   | 4        |
| Fecha de Registro:  | 1999 4 9 |

| Puntos                      |        | Hora de registro del punto indicado (h) |          |      |          |            |          |        |        |        |         | Intervalo de tiempo en horas necesario para el registro del punto indicado |         |         |       |        |        |         |        |        |        |  |  |  |  |
|-----------------------------|--------|-----------------------------------------|----------|------|----------|------------|----------|--------|--------|--------|---------|----------------------------------------------------------------------------|---------|---------|-------|--------|--------|---------|--------|--------|--------|--|--|--|--|
|                             |        | Estación                                |          |      |          |            |          |        |        |        |         |                                                                            |         |         |       |        |        |         |        |        |        |  |  |  |  |
|                             |        | Quiló Obs.                              | Izobamba | Tola | Chorrera | Aeropuerto | Inaquito | Q.Oba. | Chorr. | Q.Oba. | Inaqui. | Q.Oba.                                                                     | Aeropu. | Inaqui. | Tola  | Chorr. | Izoba. | Aeropu. | Tola   | Chorr. | Tola   |  |  |  |  |
| Inicio                      | 27.42  |                                         | 28.67    |      |          | 28.00      |          |        |        |        | 17.067  | 4.034                                                                      | 11.140  | 4.497   | 7.978 | 3.993  | 10.233 | 6.615   | 1.7874 | 8.609  | 120.35 |  |  |  |  |
| A                           | 28.25  |                                         | 28.33    |      |          | 28.60      |          |        |        |        |         |                                                                            |         | 0.75    | -0.58 |        | 1.33   |         |        |        |        |  |  |  |  |
| I. Max                      | 28.875 |                                         | 28.26    |      |          | 28.25      |          |        |        |        |         |                                                                            |         | 0.92    | -0.35 |        | 1.27   |         |        |        |        |  |  |  |  |
| Fin                         | 32.00  |                                         | 30.83    |      |          | 32.00      |          |        |        |        |         |                                                                            |         | 0.63    | 0.63  |        | 0.00   |         |        |        |        |  |  |  |  |
| Guardi                      | 2      | 30%                                     | 2        | 80%  |          | 1          | 50%      |        |        |        |         |                                                                            |         | 1.17    | 0.00  |        | 1.17   |         |        |        |        |  |  |  |  |
| Tiempo Promedio (h.):       |        |                                         |          |      |          |            |          |        |        |        |         |                                                                            |         |         |       |        |        |         |        |        |        |  |  |  |  |
| Velocidades Promedio (m/s): |        |                                         |          |      |          |            |          |        |        |        |         |                                                                            |         |         |       |        |        |         |        |        |        |  |  |  |  |
| Velocidades para Imax(m/s): |        |                                         |          |      |          |            |          |        |        |        |         |                                                                            |         |         |       |        |        |         |        |        |        |  |  |  |  |
| Velocidades para Imax(m/s): |        |                                         |          |      |          |            |          |        |        |        |         |                                                                            |         |         |       |        |        |         |        |        |        |  |  |  |  |

Numero de Tormenta: 5

Tipo de Tormenta: 4

Fecha de Registro: 1984 2 10

| Puntos  |  | Hora de registro del punto indicado (h) |          |       |          |            |          |   |     |   |     | Intervalo de tiempo en horas necesario para el registro del punto indicado |        |         |       |         |       |         |       |         |       |
|---------|--|-----------------------------------------|----------|-------|----------|------------|----------|---|-----|---|-----|----------------------------------------------------------------------------|--------|---------|-------|---------|-------|---------|-------|---------|-------|
|         |  | Estacion                                |          |       |          |            |          |   |     |   |     |                                                                            |        |         |       |         |       |         |       |         |       |
|         |  | Guifo                                   | Izobamba | Tola  | Chorrera | Aeropuerto | Inaquito |   |     |   |     | Izoba.                                                                     | Chorr. | Q. obe. | Izob. | Q. obe. | Izob. | Q. obe. | Izob. | Q. obe. | Izob. |
| Inicio  |  | 14.97                                   | 14.00    | 14.82 | 14.93    | 17.42      |          |   |     |   |     | 17687                                                                      | 4034   | 11149   | 4497  | 7978    | 3893  | 10233   | 6615  | 17874   | 8909  |
| I. Max  |  | 14.92                                   | 14.25    | 14.90 | 14.90    | 20.18      |          |   |     |   |     | 0.97                                                                       | 0.04   | -0.16   | -2.75 |         |       |         | 0.93  | -2.78   | -2.90 |
| Fin     |  | 17.00                                   | 14.82    | 15.00 | 15.25    | 21.33      |          |   |     |   |     | 0.97                                                                       | 0.02   | 0.02    | -5.27 |         |       |         | 0.95  | -5.28   | -5.28 |
| Cuartil |  | 1                                       | 70%      | 1     | 40%      | 4          | 10%      | 4 | 20% | 3 | 30% | 2.18                                                                       | 1.75   | 2.00    | -4.33 |         |       |         | 0.43  | -6.08   | -6.33 |
|         |  | Tiempo Promedio (h.):                   |          |       |          |            |          |   |     |   |     | 1.17                                                                       | 0.90   | 0.62    | ---   | -4.12   | ---   | ---     | ---   | 0.57    | -4.72 |
|         |  | Velocidades Promedio (m/s):             |          |       |          |            |          |   |     |   |     | 4.19                                                                       | 1.96   | 4.97    | ---   | -0.54   | ---   | ---     | ---   | 8.68    | -0.51 |
|         |  | Velocidades para Imax(m/s):             |          |       |          |            |          |   |     |   |     | 7.37                                                                       | 65.92  | 182.17  | ---   | -0.42   | ---   | ---     | ---   | 7.94    | -0.45 |

Numero de Tormenta: 6

Tipo de Tormenta: 4

Fecha de Registro: 1983 3 14

| Puntos  |  | Hora de registro del punto indicado (h) |          |       |          |            |          |  |  |  |  | Velocidades de movimiento entre estaciones (m/s) |        |         |       |         |       |         |       |         |       |
|---------|--|-----------------------------------------|----------|-------|----------|------------|----------|--|--|--|--|--------------------------------------------------|--------|---------|-------|---------|-------|---------|-------|---------|-------|
|         |  | Estacion                                |          |       |          |            |          |  |  |  |  |                                                  |        |         |       |         |       |         |       |         |       |
|         |  | Guifo                                   | Izobamba | Tola  | Chorrera | Aeropuerto | Inaquito |  |  |  |  | Izoba.                                           | Chorr. | Q. obe. | Izob. | Q. obe. | Izob. | Q. obe. | Izob. | Q. obe. | Izob. |
| Inicio  |  | 15.58                                   | 15.57    | 15.67 |          |            |          |  |  |  |  | 17687                                            | 4034   | 11149   | 4497  | 7978    | 3893  | 10233   | 6615  | 17874   | 8909  |
| A       |  | 15.33                                   |          |       |          |            |          |  |  |  |  | -0.08                                            |        | -0.08   |       |         |       |         |       |         |       |
| I. Max  |  | 15.97                                   | 15.92    | 15.93 |          |            |          |  |  |  |  | 0.05                                             |        | 0.03    |       |         |       |         |       |         |       |
| Fin     |  | 18.33                                   | 18.17    | 18.00 |          |            |          |  |  |  |  | 0.17                                             |        | 0.33    |       |         |       |         |       |         |       |
| Cuartil |  | 2                                       | 20%      | 2     | 80%      | 4          | 10%      |  |  |  |  | 0.03                                             | ---    | 0.09    | ---   | ---     | ---   | ---     | ---   | ---     | ---   |
|         |  | Tiempo Promedio (h.):                   |          |       |          |            |          |  |  |  |  | 149.45                                           | ---    | 32.83   | ---   | ---     | ---   | ---     | ---   | ---     | ---   |
|         |  | Velocidades Promedio (m/s):             |          |       |          |            |          |  |  |  |  | 98.25                                            | ---    | 91.09   | ---   | ---     | ---   | ---     | ---   | ---     | ---   |
|         |  | Velocidades para Imax(m/s):             |          |       |          |            |          |  |  |  |  | ---                                              | ---    | ---     | ---   | ---     | ---   | ---     | ---   | ---     | ---   |



**A N E X O      N° 5**

## Calculo de la curva precipitacion - area

Tormenta: 1982 - 12 - 07

Duracion: 3 h

| Punto | Precipitacion Puntual<br>(mm) | Area Total<br>(Km2) | Area de isoyeta<br>(Km2) | Precipitacion Promedio<br>(mm) | Volumen Isoyeta<br>(Km2*mm) | Volumen Total<br>(Km2*mm) | Precipitacion Promedio<br>(mm) | Precipitacion Promedio<br>(%) |
|-------|-------------------------------|---------------------|--------------------------|--------------------------------|-----------------------------|---------------------------|--------------------------------|-------------------------------|
| 1     | 30.7                          | 0.00                | 0.00                     | 30.70                          | 0.00                        | 0.00                      | 30.70                          | 100                           |
| 2     | 30.0                          | 0.53                | 0.53                     | 30.35                          | 16.09                       | 16.09                     | 30.35                          | 99                            |
| 3     | 28.0                          | 5.32                | 4.79                     | 29.00                          | 138.91                      | 155.00                    | 29.13                          | 95                            |
| 4     | 26.0                          | 15.38               | 10.06                    | 27.00                          | 271.62                      | 426.62                    | 27.74                          | 90                            |
| 5     | 24.0                          | 32.54               | 17.16                    | 25.00                          | 429.00                      | 855.62                    | 26.29                          | 86                            |
| 6     | 22.0                          | 50.30               | 17.76                    | 23.00                          | 408.48                      | 1264.10                   | 25.13                          | 82                            |
| 7     | 20.0                          | 72.20               | 21.90                    | 21.00                          | 459.90                      | 1724.00                   | 23.88                          | 78                            |
| 8     | 18.0                          | 90.53               | 18.33                    | 19.00                          | 348.27                      | 2072.27                   | 22.89                          | 75                            |
| 9     | 16.0                          | 116.00              | 25.47                    | 17.00                          | 432.99                      | 2505.26                   | 21.60                          | 70                            |

Tormenta: 1982 - 12 - 07

Duracion: 2 h

| Punto | Precipitacion Puntual<br>(mm) | Area Total<br>(Km2) | Area de isoyeta<br>(Km2) | Precipitacion Promedio<br>(mm) | Volumen Isoyeta<br>(Km2*mm) | Volumen Total<br>(Km2*mm) | Precipitacion Promedio<br>(mm) | Precipitacion Promedio<br>(%) |
|-------|-------------------------------|---------------------|--------------------------|--------------------------------|-----------------------------|---------------------------|--------------------------------|-------------------------------|
| 1     | 29.8                          | 0.00                | 0.00                     | 29.80                          | 0.00                        | 0.00                      | 29.80                          | 100                           |
| 2     | 28.0                          | 4.74                | 4.74                     | 28.90                          | 136.99                      | 136.99                    | 28.90                          | 97                            |
| 3     | 24.0                          | 24.26               | 19.52                    | 26.00                          | 507.52                      | 644.51                    | 26.57                          | 89                            |
| 4     | 20.0                          | 63.90               | 39.64                    | 22.00                          | 872.08                      | 1516.59                   | 23.73                          | 80                            |
| 5     | 16.0                          | 107.70              | 43.80                    | 18.00                          | 788.40                      | 2304.99                   | 21.40                          | 72                            |
| 6     | 12.0                          | 167.45              | 59.75                    | 14.00                          | 836.50                      | 3141.49                   | 18.76                          | 63                            |

Tormenta: 1982 - 12 - 07

Duracion: 1/2 h

| Punto | Precipitacion Puntual<br>(mm) | Area Total<br>(Km2) | Area de isoyeta<br>(Km2) | Precipitacion Promedio<br>(mm) | Volumen Isoyeta<br>(Km2*mm) | Volumen Total<br>(Km2*mm) | Precipitacion Promedio<br>(mm) | Precipitacion Promedio<br>(%) |
|-------|-------------------------------|---------------------|--------------------------|--------------------------------|-----------------------------|---------------------------|--------------------------------|-------------------------------|
| 1     | 21.0                          | 0.00                | 0.00                     | 21.00                          | 0.00                        | 0.00                      | 21.00                          | 100                           |
| 2     | 20.0                          | 2.37                | 2.37                     | 20.50                          | 48.59                       | 48.59                     | 20.50                          | 98                            |
| 3     | 18.0                          | 11.83               | 9.46                     | 19.00                          | 179.74                      | 228.33                    | 19.30                          | 92                            |
| 4     | 16.0                          | 27.81               | 15.98                    | 17.00                          | 271.66                      | 499.99                    | 17.98                          | 86                            |
| 5     | 14.0                          | 49.70               | 21.89                    | 15.00                          | 328.35                      | 828.34                    | 16.67                          | 79                            |
| 6     | 12.0                          | 73.37               | 23.67                    | 13.00                          | 307.71                      | 1136.05                   | 15.48                          | 74                            |
| 7     | 10.0                          | 111.24              | 37.87                    | 11.00                          | 416.57                      | 1552.62                   | 13.96                          | 66                            |

Tormenta: 1982 - 11 - 19

Duracion: 3h

| Punto | Precipitacion Puntual<br>(mm) | Area Total<br>(Km2) | Area de isoyeta<br>(Km2) | Precipitacion Promedio<br>(mm) | Volumen Isoyeta<br>(Km2*mm) | Volumen Total<br>(Km2*mm) | Precipitacion Promedio<br>(mm) | Precipitacion Promedio<br>(%) |
|-------|-------------------------------|---------------------|--------------------------|--------------------------------|-----------------------------|---------------------------|--------------------------------|-------------------------------|
| 1     | 22.8                          | 0.00                | 0.00                     | 22.80                          | 0.00                        | 0.00                      | 22.80                          | 100                           |
| 2     | 22.0                          | 1.20                | 1.20                     | 22.40                          | 26.88                       | 26.88                     | 22.40                          | 98                            |
| 3     | 20.0                          | 10.70               | 9.50                     | 21.00                          | 199.50                      | 226.38                    | 21.16                          | 93                            |
| 4     | 18.0                          | 25.44               | 14.74                    | 19.00                          | 280.06                      | 506.44                    | 19.91                          | 87                            |
| 5     | 16.0                          | 43.19               | 17.75                    | 17.00                          | 301.75                      | 808.19                    | 18.71                          | 82                            |

Tormenta: 1982 - 10 - 04

Duracion: 6h

| Punto | Precipitacion Puntual<br>(mm) | Area Total<br>(Km2) | Area de isoyeta<br>(Km2) | Precipitacion Promedio<br>(mm) | Volumen Isoyeta<br>(Km2*mm) | Volumen Total<br>(Km2*mm) | Precipitacion Promedio<br>(mm) | Precipitacion Promedio<br>(%) |
|-------|-------------------------------|---------------------|--------------------------|--------------------------------|-----------------------------|---------------------------|--------------------------------|-------------------------------|
| 1     | 34.1                          | 0.00                | 0.00                     | 34.10                          | 0.00                        | 0.00                      | 34.10                          | 100                           |
| 2     | 32.0                          | 1.80                | 1.80                     | 33.05                          | 59.49                       | 59.49                     | 33.05                          | 97                            |
| 3     | 28.0                          | 14.20               | 12.40                    | 30.00                          | 372.00                      | 431.49                    | 30.39                          | 89                            |
| 4     | 24.0                          | 32.54               | 18.34                    | 26.00                          | 478.84                      | 908.33                    | 27.91                          | 82                            |
| 5     | 20.0                          | 59.76               | 27.22                    | 22.00                          | 598.84                      | 1507.17                   | 25.22                          | 74                            |
| 6     | 18.0                          | 79.90               | 19.54                    | 19.00                          | 371.26                      | 1878.43                   | 23.69                          | 69                            |



Tormenta: 1982 - 10 - 04

Duracion: 2h

| Punto | Precipitacion Puntual<br>(mm) | Area Total<br>(Km2) | Area de Isoyeta<br>(Km2) | Precipitacion Promedio<br>(mm) | Volumen Isoyeta<br>(Km2*mm) | Volumen Total<br>(Km2*mm) | Precipitacion Promedio<br>(mm) | Precipitacion Promedio<br>% |
|-------|-------------------------------|---------------------|--------------------------|--------------------------------|-----------------------------|---------------------------|--------------------------------|-----------------------------|
| 1     | 32.7                          | 0.00                | 0.00                     | 32.70                          | 0.00                        | 0.00                      | 32.70                          | 100                         |
| 2     | 30.0                          | 3.25                | 3.25                     | 31.35                          | 101.89                      | 101.89                    | 31.35                          | 96                          |
| 3     | 26.0                          | 17.20               | 13.95                    | 28.00                          | 390.60                      | 492.49                    | 28.63                          | 88                          |
| 4     | 22.0                          | 37.90               | 20.70                    | 24.00                          | 496.80                      | 989.29                    | 26.10                          | 80                          |
| 5     | 18.0                          | 68.04               | 30.14                    | 20.00                          | 602.80                      | 1592.09                   | 23.40                          | 72                          |

Tormenta: 1982 - 10 - 04

Duracion: 1/2h

| Punto | Precipitacion Puntual<br>(mm) | Area Total<br>(Km2) | Area de Isoyeta<br>(Km2) | Precipitacion Promedio<br>(mm) | Volumen Isoyeta<br>(Km2*mm) | Volumen Total<br>(Km2*mm) | Precipitacion Promedio<br>(mm) | Precipitacion Promedio<br>% |
|-------|-------------------------------|---------------------|--------------------------|--------------------------------|-----------------------------|---------------------------|--------------------------------|-----------------------------|
| 1     | 25.0                          | 0.00                | 0.00                     | 25.00                          | 0.00                        | 0.00                      | 25.00                          | 100                         |
| 2     | 24.0                          | 1.10                | 1.10                     | 24.50                          | 26.95                       | 26.95                     | 24.50                          | 98                          |
| 3     | 22.0                          | 6.51                | 5.41                     | 23.00                          | 124.43                      | 151.38                    | 23.25                          | 93                          |
| 4     | 18.0                          | 29.60               | 23.09                    | 20.00                          | 461.80                      | 613.18                    | 20.72                          | 83                          |
| 5     | 14.0                          | 54.44               | 24.84                    | 16.00                          | 397.44                      | 1010.62                   | 18.56                          | 74                          |
| 6     | 10.0                          | 94.08               | 39.64                    | 12.00                          | 475.68                      | 1486.30                   | 15.80                          | 63                          |

Tormenta: 1982 - 09 - 19

Duracion: 3h

| Punto | Precipitacion Puntual<br>(mm) | Area Total<br>(Km2) | Area de Isoyeta<br>(Km2) | Precipitacion Promedio<br>(mm) | Volumen Isoyeta<br>(Km2*mm) | Volumen Total<br>(Km2*mm) | Precipitacion Promedio<br>(mm) | Precipitacion Promedio<br>% |
|-------|-------------------------------|---------------------|--------------------------|--------------------------------|-----------------------------|---------------------------|--------------------------------|-----------------------------|
| 1     | 37.5                          | 0.00                | 0.00                     | 37.50                          | 0.00                        | 0.00                      | 37.50                          | 100                         |
| 2     | 36.0                          | 1.20                | 1.20                     | 36.75                          | 44.10                       | 44.10                     | 36.75                          | 98                          |
| 3     | 32.0                          | 9.50                | 8.30                     | 34.00                          | 282.20                      | 326.30                    | 34.35                          | 92                          |
| 4     | 28.0                          | 24.30               | 14.80                    | 30.00                          | 444.00                      | 770.30                    | 31.70                          | 85                          |
| 5     | 24.0                          | 44.40               | 20.10                    | 26.00                          | 522.60                      | 1292.90                   | 29.12                          | 78                          |
| 6     | 20.0                          | 72.20               | 27.80                    | 22.00                          | 611.60                      | 1904.50                   | 26.38                          | 70                          |
| 7     | 18.0                          | 86.00               | 13.80                    | 19.00                          | 262.20                      | 2166.70                   | 25.19                          | 67                          |

Tormenta: 1982 - 09 - 19

Duracion: 1/2 h

| Punto | Precipitacion Puntual<br>(mm) | Area Total<br>(Km2) | Area de Isoyeta<br>(Km2) | Precipitacion Promedio<br>(mm) | Volumen Isoyeta<br>(Km2*mm) | Volumen Total<br>(Km2*mm) | Precipitacion Promedio<br>(mm) | Precipitacion Promedio<br>% |
|-------|-------------------------------|---------------------|--------------------------|--------------------------------|-----------------------------|---------------------------|--------------------------------|-----------------------------|
| 1     | 18.3                          | 0.00                | 0.00                     | 18.30                          | 0.00                        | 0.00                      | 18.30                          | 100                         |
| 2     | 16.0                          | 5.90                | 5.90                     | 17.15                          | 101.19                      | 101.19                    | 17.15                          | 94                          |
| 3     | 14.0                          | 20.12               | 14.22                    | 15.00                          | 213.30                      | 314.49                    | 15.63                          | 85                          |
| 4     | 12.0                          | 38.46               | 18.34                    | 13.00                          | 238.42                      | 552.91                    | 14.38                          | 79                          |
| 5     | 10.0                          | 65.08               | 26.62                    | 11.00                          | 292.82                      | 845.73                    | 13.00                          | 71                          |
| 6     | 8.0                           | 94.08               | 29.00                    | 9.00                           | 261.00                      | 1106.73                   | 11.76                          | 64                          |
