# Supplementary material
Source: Copernicus journal article supplement (doi:10.5194/egusphere-2026-1317)
Supplement: Supplementary file [file 3 Beltran_2003def.pdf › BilbiografiaEscaneada/3 Beltran_2003def.pdf]

ESCUELA POLITECNICA NACIONAL  
ESCUELA DE POSTGRADO EN INGENIERIA Y CIENCIAS

MODELOS DISTRIBUIDOS DE TORMENTAS Y SU  
APLICACION AL CALCULO DE CRECIDAS

PROYECTO PREVIO A LA OBTENCION DEL GRADO DE  
MAGISTER EN INGENIERIA DE LOS RECURSO HIDRICOS  
Y CIENCIAS DEL AGUA, MENCIÓN MANEJO Y  
GESTION DEL AGUA

FLANKLIN APARICIO BELTRAN VEGA

*DIRECTOR: DR. ING. LAUREANO ANDRADE CH.*

QUITO, NOVIEMBRE 2003



# **ESCUELA POLITÉCNICA NACIONAL**

## **ESCUELA DE POSTGRADO EN INGENIERÍA Y CIENCIAS**

### **MODELOS DISTRIBUIDOS DE TORMENTAS Y SU APLICACIÓN AL CALCULO DE CRECIDAS**

**PROYECTO PREVIO A LA OBTENCIÓN DEL GRADO DE MAGÍSTER EN  
INGENIERIA DE LOS RECURSO HÍDRICOS Y CIENCIAS DEL AGUA,  
MENCIÓN MANEJO Y GESTION DEL AGUA**

**FRANKLIN APARICIO BELTRÁN VEGA**

**DIRECTOR: DR. ING. LAUREANO ANDRADE CHAVEZ**

**Quito, noviembre 2003**

## DECLARACIÓN

Yo, **BELTRÁN VEGA FRANKLIN APARICIO**, declaro que el trabajo aquí descrito es de mi autoría; que no ha sido previamente presentado para ningún grado o calificación profesional; y, que he consultado las referencias bibliográficas que se incluyen en este documento.

La Escuela Politécnica Nacional, puede hacer uso de los derechos compartidos correspondientes a este trabajo, según lo establecido por la Ley de Propiedad Intelectual por su Reglamento y por la normatividad institucional vigente.

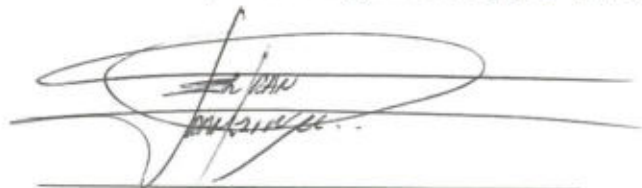A handwritten signature in dark ink, appearing to read 'Franklin Beltrán Vega', is written over a horizontal line.

**Franklin Beltrán Vega**

## CERTIFICACIÓN

Certifico que el presente trabajo fue desarrollado por el Ing. Beltrán Vega Franklin Aparicio, bajo mi supervisión.



---

**Dr.Ing. LAUREANO ANDRADE CH.**

**DIRECTOR DE PROYECTO**



## AGRADECIMIENTOS

A mi familia, por su paciente espera.

A mi director de tesis, Dr. Ing. Laureano Andrade por su permanente dirección.

A los miembros del tribunal de calificación Dr. Marco Castro y Dr. Remigio Galárraga por los aportes durante las revisiones realizadas a la tesis.

A mis buenos y gratos amigos, Alberto Aguirre, Mario Muñoz, Raúl Caicedo, Miguel Angel Mendoza, Marcelo Montalvo, entre otros, por permitirme asimilar sus experiencias.

A todas las personas que de una u otra manera han permitido el desarrollo y culminación de este trabajo de investigación.

## DEDICATORIA

A mi esposa, que contribuyó como nadie en este trabajo y permitió la estabilidad necesaria para desarrollarlo.

A mis Hijos, Jhoan y Nicolás, por privarles del valioso tiempo que ocupó este trabajo. Un día leerán lo escrito con ojos de entendimiento, y recordarán las difíciles pero felices circunstancias en las que fueron realizadas.

A mi Madre y a mi Padre, por su continua fortaleza.

## CONTENIDO

|                                                                              |      |
|------------------------------------------------------------------------------|------|
| DECLARACIÓN .....                                                            | II   |
| CERTIFICACIÓN .....                                                          | III  |
| AGRADECIMIENTOS .....                                                        | IV   |
| DEDICATORIA .....                                                            | V    |
| LISTA DE FIGURAS .....                                                       | X    |
| LISTA DE CUADROS .....                                                       | XIII |
| SIMBOLOGIA .....                                                             | XIV  |
| RESUMEN .....                                                                | XVI  |
| PRESENTACION.....                                                            | XVII |
| 1.1 INTRODUCCION, ALCANCE DEL TRABAJO Y LIMITACIONES.....                    | 1    |
| 1.2 SISTEMAS .....                                                           | 5    |
| 1.2.1 TIPOS DE MODELOS DE SIMULACIÓN HIDROLOGICA .....                       | 7    |
| 1.3 VENTAJAS Y DESVENTAJAS DE LA SIMULACION.....                             | 11   |
| 1.4 EL PROCESO PRECIPITACIÓN-ESCURRIMIENTO .....                             | 12   |
| 1.5 TORMENTA O LLUVIA CRITICA.....                                           | 14   |
| 1.6 SISTEMAS DE INFORMACIÓN GEOGRAFICA (SIG) Y MODELOS<br>DISTRIBUIDOS ..... | 19   |
| CAPITULO 2.....                                                              | 27   |



|                                                                                                                                    |           |
|------------------------------------------------------------------------------------------------------------------------------------|-----------|
| <b>BASE TEORICA Y ESTADO DEL ARTE .....</b>                                                                                        | <b>27</b> |
| 2.1 NATURALEZA DE LAS TORMENTAS .....                                                                                              | 27        |
| 2.2 LAS NUBES .....                                                                                                                | 33        |
| 2.3 TEORIA COLUMNAR DE LAS TORMENTAS .....                                                                                         | 38        |
| <b>CAPITULO 3 .....</b>                                                                                                            | <b>41</b> |
| <b>TORMENTAS EN QUITO .....</b>                                                                                                    | <b>41</b> |
| 3.1 DIRECCIONES PRINCIPALES DE TORMENTAS EN QUITO.....                                                                             | 41        |
| 3.2 PATRONES TEMPORALES DE LLUVIA EN QUITO.....                                                                                    | 42        |
| 3.3 DURACION DE TORMENTAS EN QUITO .....                                                                                           | 44        |
| <b>CAPITULO 4.....</b>                                                                                                             | <b>45</b> |
| <b>MODELO DE LLUVIA PROPUESTO .....</b>                                                                                            | <b>45</b> |
| 4.1 INTRODUCCIÓN .....                                                                                                             | 45        |
| 4.2 DESCRIPCION DEL MODELO.....                                                                                                    | 48        |
| 4.2.1 ECUACIONAMIENTO DEL MODELO.....                                                                                              | 51        |
| 4.2.1.1 DISTRIBUCION ESPACIAL DE LA LAMINA DE PRECIPITACION,<br>CONFORME SE DESARROLLA LA TORMENTA (PATRONES<br>TEMPOAREALES)..... | 60        |
| 4.2.2 DISTRIBUCION TEMPORAL DE LA LLUVIA.....                                                                                      | 72        |
| 4.2.3 INTEGRACIÓN DEL MODELO COMPLEMENTANDO LA<br>DISTRIBUCIÓN TEMPORAL Y LOS PATRONES TEMPOAREALES .....                          | 76        |
| 4.3 CALIBRACIÓN DEL MODELO .....                                                                                                   | 80        |
| 4.3.1 INTRODUCCIÓN .....                                                                                                           | 80        |

|                                                   |                                                                                  |            |
|---------------------------------------------------|----------------------------------------------------------------------------------|------------|
| 4.3.2                                             | DATOS UTILIZADOS.....                                                            | 81         |
| 4.3.3                                             | ELEMENTOS DEL MODELO .....                                                       | 84         |
| 4.3.4                                             | METODO DE AJUSTE DEL MODELO .....                                                | 87         |
| <b>CAPITULO 5 .....</b>                           |                                                                                  | <b>101</b> |
| <b>APLICACIÓN CON HIDROGRAMAS DE CRECIDA.....</b> |                                                                                  | <b>101</b> |
| <b>5.1</b>                                        | <b>MODELO DE ESCURRIMIENTO Y APLICACION SIG .....</b>                            | <b>101</b> |
| 5.1.1                                             | DESCRIPCION DEL MODELO PRECIPITACIÓN ESCURRIMIENTO<br>UTILIZADO .....            | 102        |
| 5.1.1.1                                           | CONSIDERACIONES SOBRE EL FLUJO EN LADERA .....                                   | 103        |
| A)                                                | ANÁLISIS DEL FENÓMENO PRECIPITACIÓN-ESCURRIMIENTO EN UNA<br>CELDA O PARCELA..... | 104        |
| B)                                                | ANÁLISIS DEL ESCURRIMIENTO DE CELDA EN CELDA .....                               | 113        |
| 5.1.1.2                                           | CONSIDERACIONES SOBRE EL FLUJO EN LOS CAUCES .....                               | 114        |
| <b>5.2</b>                                        | <b>CUENCA DE ESTUDIO.....</b>                                                    | <b>116</b> |
| <b>5.3</b>                                        | <b>GENERACIÓN DE HIDROGRAMAS .....</b>                                           | <b>117</b> |
| 5.3.1                                             | APLICACIÓN CON DISTINTOS ESCENARIOS DE FORMACIÓN DE LA<br>LLUVIA.....            | 122        |
|                                                   | ESCENARIO A; VARIACIÓN DE LA DURACIÓN DE TORMENTA.....                           | 123        |
|                                                   | ESCENARIO B; VARIACIÓN DEL TIEMPO DE DESFASE .....                               | 125        |
|                                                   | ESCENARIO C; VARIACIÓN DEL PERIODO DE RETORNO DE LLUVIA.....                     | 127        |
| <b>CAPITULO 6 .....</b>                           |                                                                                  | <b>128</b> |
| <b>ANÁLISIS COMPARATIVO DE RESULTADOS.....</b>    |                                                                                  | <b>128</b> |
| <b>CAPITULO 7 .....</b>                           |                                                                                  | <b>131</b> |
| <b>CONCLUSIONES Y RECOMENDACIONES .....</b>       |                                                                                  | <b>131</b> |

|                                                                                                                        |                       |     |
|------------------------------------------------------------------------------------------------------------------------|-----------------------|-----|
| 7.1                                                                                                                    | CONCLUSIONES .....    | 131 |
| 7.2                                                                                                                    | RECOMENDACIONES ..... | 133 |
| CAPITULO 8.....                                                                                                        |                       | 134 |
| REFERENCIAS BIBLIOGRAFICAS .....                                                                                       |                       | 134 |
| ANEXOS .....                                                                                                           |                       | 137 |
| ANEXO A: PLAN DE PROYECTO .....                                                                                        |                       | 138 |
| ANEXO B: PROGRAMA DE APOYO A LA CALIBRACION .....                                                                      |                       | 139 |
| ANEXO C: ANÁLISIS DE SENSIBILIDAD DEL MODELO .....                                                                     |                       | 140 |
| ANEXO D: REPORTE GRAFICO DE AJUSTE DE TORMENTAS.....                                                                   |                       | 141 |
| ANEXO E: CALCULO DE LA DISMINUCIÓN DE LA PRECIPITACIÓN MEDIA<br>CON EL AUMENTO DEL AREA DE TORMENTA.....               |                       | 142 |
| ANEXO F: REPORTE DE ESCENARIOS DE MODELACIÓN DEL FENÓMENO<br>PRECIPITACIÓN-ESCURRIMIENTO UTILIZANDO EL PROGRAMA MISION |                       | 143 |
| ANEXO G: REPORTE DE LA MODELACIÓN DEL FENÓMENO<br>PRECIPITACIÓN ESCURRIMIENTO UTILIZANDO EL PROGRAMA HIDRO             |                       | 144 |
| ANEXO H: CUADROS Y FIGURAS .....                                                                                       |                       | 212 |
| ANEXO I: CODIGO FUENTE DE LA PROGRAMAS UTILIZADOS .....                                                                |                       | 218 |



## LISTA DE FIGURAS

|              |                                                                                                                       |    |
|--------------|-----------------------------------------------------------------------------------------------------------------------|----|
| Fig.N°.1.1:  | Representación esquemática de un sistema.....                                                                         | 6  |
| Fig.N°.1.2:  | Ciclo Hidrológico.....                                                                                                | 13 |
| Fig.N°.1.3:  | Representación del sistema precipitación-escorrentía.....                                                             | 13 |
| Fig.N°.1.4:  | Representación simplificada del sistema precipitación-<br>escorrentía .....                                           | 14 |
| Fig.N°.1.5:  | Distribución temporal de la precipitación.....                                                                        | 16 |
| Fig.N°.1.6:  | Distribución Areal de la precipitación según Huff(1967).....                                                          | 17 |
| Fig.N°.1.7:  | Lluvia media con relación al área de cobertura.....                                                                   | 19 |
| Fig.N°.1.8:  | Componentes del Software en un sistema de información<br>geográfica.....                                              | 21 |
| Fig.N°.1.9:  | Modelo Digital de Elevación.....                                                                                      | 22 |
| Fig.N°.1.10: | Estructura de redes de datos de elevación.....                                                                        | 23 |
| Fig.N°.1.11: | Estructura de datos raster en un SIG.....                                                                             | 26 |
| Fig.N°.2.1:  | Tamaño relativo de los meteoros en una nube.....                                                                      | 29 |
| Fig.N°.2.2:  | Esquema del proceso de coalescencia.....                                                                              | 32 |
| Fig.N°.2.3:  | Esquema del desarrollo de una Cumulonimbus.....                                                                       | 37 |
| Fig.N°.2.4:  | Etapas de una célula de tormenta .....                                                                                | 40 |
| Fig.N°.3.1:  | Direcciones Principales de Tormentas en Quito (DPT).....                                                              | 41 |
| Fig.N°.3.2:  | Patrones temporales de tormenta de primer cuartil.....                                                                | 43 |
| Fig.N°.3.3:  | Distribución de tormentas en Quito según su duración.....                                                             | 44 |
| Fig.N°.4.1:  | Pluviogramas simultáneos observados en Quito,87/05/22.....                                                            | 46 |
| Fig.N°.4.2:  | Escenario de análisis de presentación de lluvia.....                                                                  | 49 |
| Fig.N°.4.3:  | Posible variación de escenario de presentación de lluvia.....                                                         | 49 |
| Fig.N°.4.4:  | Representación de la duración de lluvia respecto al radio de<br>cobertura de una tormenta unicelular.....             | 51 |
| Fig.N°.4.5:  | Cambios de la duración de lluvia con respecto al radio de<br>cobertura.....                                           | 54 |
| Fig.N°.4.6:  | Precipitación vs duración de tormentas tipo.....                                                                      | 56 |
| Fig.N°.4.7:  | Gráfico preliminar de la variación del exponente $n$ con relación a<br>la duración de tormenta en su centro.(DT)..... | 59 |

|               |                                                                                                                        |     |
|---------------|------------------------------------------------------------------------------------------------------------------------|-----|
| Fig.Nº.4.8:   | Modelos equivalentes de la duración de tormenta.....                                                                   | 61  |
| Fig.Nº.4.9:   | Patrones tempo-areales de tormentas unicelulares .....                                                                 | 64  |
| Fig.Nº.4.10:  | Representación del modelo de duración de tormenta.....                                                                 | 65  |
| Fig.Nº.4.11:  | Relación preliminar entre $K$ y Duración de lluvia en el centro de tormenta.....                                       | 69  |
| Fig.Nº. 4.12: | Distribución temporal de la lluvia adimensional.....                                                                   | 73  |
| Fig.Nº. 4.13: | Relación entre tiempo de inicio de tormenta en un punto cualquiera y en el centro de tormenta.....                     | 77  |
| Fig.Nº.4.14:  | Pluviogramas simulados para el centro de tormenta y para un punto situado a radio igual a 2 km.....                    | 79  |
| Fig.Nº.4.15:  | Influencia del viento en la simulación.....                                                                            | 86  |
| Fig.Nº. 4.16: | Esquema de criterio de ajuste entre pluviogramas; simulado y observado, (centro de tormenta.....                       | 89  |
| Fig.Nº.4.17:  | Curva ajustada que relaciona $n/Dtc$ y la duración en el centro de tormenta $DTc$ .....                                | 96  |
| Fig.Nº.4.18:  | Curva ajustada que relaciona la $k/DTc$ con la duración en el centro de tormenta $DTc$ .....                           | 96  |
| Fig.Nº.4.19:  | Curva ajustada que relaciona $V/DTc$ con la duración en el centro de tormenta $DTc$ .....                              | 97  |
| Fig.Nº.4.20:  | Curva de ajuste entre la Intensidad en el centro de tormenta( $I_c$ ) con relación a su duración $DTc$ .....           | 97  |
| Fig.Nº.4.21:  | Curva de ajuste entre la $K_2/DTc$ con relación a la Duración en el centro de tormenta $DTc$ .....                     | 98  |
| Fig.Nº.4.22:  | Curva de ajuste entre la $K/DTc$ con relación a la intensidad media en el centro de tormenta( $I_c$ ).....             | 98  |
| Fig.Nº.4.23:  | Curvas de la disminución de la precipitación media con relación al aumento del área.....                               | 100 |
| Fig.Nº.5.1:   | Esquema del tiempo de concentración en una parcela de ladera.....                                                      | 105 |
| Fig.Nº.5.2:   | Hidrograma de una celda con intervalo de tiempo de análisis mayor a su tiempo de concentración, $\Delta t > Ttc$ ..... | 108 |



|               |                                                                                                                                                     |     |
|---------------|-----------------------------------------------------------------------------------------------------------------------------------------------------|-----|
| Fig. N°.5.3:  | Esquema de modelo de generación de caudales para una lluvia de duración igual a $2.8\Delta t$ y $T_c < \Delta t$ .....                              | 109 |
| Fig.N°.5.4:   | Hidrograma de una celda con intervalo de tiempo de análisis igual a su tiempo de concentración, $\Delta t = T_c$ .....                              | 110 |
| Fig.N°.5.5:   | Hidrograma de una celda con intervalo de tiempo de análisis menor a su tiempo de concentración, $\Delta t < T_c$ .....                              | 110 |
| Fig.N°.5.6:   | Esquema de modelo de generación de caudales para una lluvia de Duración igual a $2.8\Delta t$ y $t_c > \Delta t$ .....                              | 112 |
| Fig.N°.5.7:   | Trayectoria del agua asegurando un recorrido óptimo.....                                                                                            | 113 |
| Fig.N°5.8:    | Hidrograma de Crecida Simulado en Qda. Rumipamba (P=56.4mm T=12h.).....                                                                             | 115 |
| Fig.N°.5.9:   | Diagrama de flujo del modelo de escurrimiento utilizado.....                                                                                        | 118 |
| Fig.N°.5.10:  | Ajuste entre Hidrogramas obtenidos por modelo HIDRO1 y modelo MISIÓN, Velocidad en ladera igual a 1.15 m/s.....                                     | 120 |
| Fig.N°.5.11:  | Ajuste de la Precipitación total y efectiva entre modelos HIDRO1 y MISIÓN, Velocidad en ladera igual a 1.15 m/s.....                                | 120 |
| Fig.N°.5.12:  | Hidrogramas de crecida para la microcuenca de la Qda. Rumipamba considerando el aumento de la duración de lluvia en su centro; Programa MISION..... | 125 |
| Fig.N°.5.13:  | Hidrogramas de crecida considerando el cambio del tiempo de desfase de lluvias en la Qda. Rumipamba; Programa MISION.....                           | 126 |
| Fig.N°. 5.14: | Hidrogramas de crecida para diferentes períodos de retorno en Qda. Rumipamba; Programa MISION.....                                                  | 127 |
| Fig.N°.6.1:   | Hidrogramas de crecida generados por modelo HIDRO1.....                                                                                             | 128 |
| Fig.N°.6.2:   | Hidrogramas de crecida generados por modelo MISION.....                                                                                             | 129 |



## LISTA DE CUADROS

|                  |                                                                                                                                                                                        |     |
|------------------|----------------------------------------------------------------------------------------------------------------------------------------------------------------------------------------|-----|
| Cuadro N°.2.1:   | Velocidad de gotas de lluvia según su diámetro.....                                                                                                                                    | 30  |
| Cuadro N°.2.2:   | Ubicación de las nubes en diferentes niveles.....                                                                                                                                      | 33  |
| Cuadro N°.3.1:   | Comparación de la probabilidad de excedencia de la distribución temporal entre Huff y Beltrán.....                                                                                     | 43  |
| Cuadro N°.4.1:   | Registro de eventos de lluvia tipo.....                                                                                                                                                | 55  |
| Cuadro N°.4.2:   | Valores del coeficiente de forma $K_2$ asociado con los patrones temporal más frecuentes en Quito.....                                                                                 | 74  |
| Cuadro N°.4.3:   | Registros de tormentas consideradas en este estudio.....                                                                                                                               | 83  |
| Cuadro N°.4.4:   | Registros pluviométricos de tormentas en Quito, seleccionadas para calibración de modelo.....                                                                                          | 84  |
| Cuadro N°.4.5:   | Relación entre los criterios de ajuste en el modelo.....                                                                                                                               | 92  |
| Cuadro N°.4.6:   | Resultados del nivel de sensibilidad (tormenta 7/12/1982).....                                                                                                                         | 93  |
| Cuadro N°.4.7:   | Datos de curvas de disminución de la precipitación media con el aumento del área de cobertura de tormenta ( $\text{km}^2$ ) para 15 tormentas unicelulares seleccionadas en Quito..... | 100 |
| Cuadro N°.5.1:   | Valores típicos del coeficiente de Manning para flujo superficial en laderas, Crawford y Linsley (1977).....                                                                           | 107 |
| Cuadro N°.5.2:   | Valores típicos del coeficiente de Manning para flujo superficial en laderas, Engman (1983).....                                                                                       | 107 |
| Cuadro N°.5.3:   | Características físicas de la micro-cuenca Rumipamba.....                                                                                                                              | 116 |
| Cuadro N°.5.4.a: | Datos de entrada y salida del modelo MISION.....                                                                                                                                       | 121 |
| Cuadro N°.5.4.b: | Datos de entrada y salida del modelo HIDRO1.....                                                                                                                                       | 121 |
| Cuadro N°.5.5:   | Presentación de los resultados en escenario 1, resultantes de cambiar la duración de la tormenta en su centro.( $DT_c$ ).....                                                          | 124 |
| Cuadro N°.6.1:   | Comparación de datos característicos de hidrogramas obtenidos por los programas HIDRO1 y MISION.....                                                                                   | 129 |

## SIMBOLOGIA

|           |                                                                                                                          |
|-----------|--------------------------------------------------------------------------------------------------------------------------|
| $K$       | Velocidad media de movimiento de una tormenta entre su centro y su periferia en km/h                                     |
| $R_{max}$ | Radio máximo de tormenta en $\text{km}^2$                                                                                |
| $DT$      | Duración de la lluvia en el centro de tormenta en horas                                                                  |
| $dt$      | Duración de la lluvia en cualquier punto ubicado a un radio $R$ de su centro en horas                                    |
| $td$      | Tiempo de desfase expresado en horas                                                                                     |
| $m$       | Exponente de curva, para análisis de la duración desde un punto de vista no lineal.                                      |
| $pre$     | Precipitación en mm de cualquier punto de cobertura de tormenta donde la duración de tormenta es igual a $dt$ .          |
| $PRE$     | Es la precipitación total en mm en el centro de tormenta que tiene una duración igual a $DT$                             |
| $I$       | Es la intensidad en cualquier punto con duración de lluvia igual a $dt$ .                                                |
| $PRE(Tr)$ | Precipitación en el centro de tormenta asociado a un período de retorno ( $Tr$ ),                                        |
| $Vi$      | Velocidad de un frente de onda de expansión o contracción que a su paso produce el inicio de tormenta, expresada en km/h |
| $Vf$      | Velocidad de un frente de onda de expansión o contracción que a su paso produce el fin de tormenta, expresada en km/h    |
| $ti$      | Tiempo de inicio y fin de tormenta en un punto particular ubicado a un radio igual a $R$                                 |
| $tf$      | Tiempo de inicio y fin de tormenta en un punto particular ubicado a un radio igual a $R$                                 |
| $ti_1$    | hora de registro, del inicio de tormenta en la estación 1 ubicada en cualquier punto interno de cobertura de tormenta.   |
| $tf_1$    | hora de registro, al fin de tormenta en la estación 1 ubicada en cualquier punto interno de cobertura de tormenta.       |

|              |                                                                                                    |
|--------------|----------------------------------------------------------------------------------------------------|
| $ti_c$       | Hora de registro del inicio de tormenta en la estación principal ubicada en el centro de tormenta. |
| $tf_c$       | Hora de registro del inicio de tormenta en la estación principal ubicada en el centro de tormenta. |
| $Dis$        | Distancia entre estaciones.                                                                        |
| $t$          | Tiempo válido entre $0 \leq t \leq dt$                                                             |
| $K_2$        | Coeficiente que define la forma de la distribución temporal de tormenta                            |
| $K_3$        | Constante igual a $K_3 = 1 - 10^{-(1/K_2)}$                                                        |
| $Ti$         | Tiempo de inicio de tormenta en su centro.                                                         |
| $Tf$         | Tiempo de fin de tormenta en su centro.                                                            |
| $P(t,R)$     | Precipitación a tiempo $t$ y radio $R$                                                             |
| $R$          | Radio de tormenta                                                                                  |
| $n$          | Parámetro de forma.                                                                                |
| $V_x$        | Componente en dirección Este-Oeste de la velocidad de vientos altos                                |
| $V_y$        | Componente en dirección Norte-Sur de la velocidad de vientos altos                                 |
| $pre_{ij}$   | Precipitación en puntos internos de tormenta                                                       |
| $N_{ajuste}$ | Número de ajuste, expresado mediante ecuación (31)                                                 |
| $Tiniobs_i$  | Tiempo de inicio de lluvia observado en la estación $i$                                            |
| $Tinisimu_i$ | Tiempo de inicio de lluvia simulado en la estación $i$                                             |
| $Tfinobs_i$  | Tiempo de fin de lluvia observado en la estación $i$                                               |
| $Tfinsimu_i$ | Tiempo de fin de lluvia simulado en la estación $i$                                                |
| $Preobs_i$   | Precipitación observado en la estación $i$                                                         |
| $Presimu_i$  | Precipitación simulado en la estación $i$                                                          |
| $ne$         | Número de estaciones que han registrado el evento de lluvia.                                       |
| $Const$      | Constante igual a 510                                                                              |



## RESUMEN

En el primer capítulo, se revisan los conceptos generales de sistemas y su representación mediante modelos. Se refrescan los conceptos del fenómeno precipitación-escurrimiento y la importancia de la componente lluvia en ellos. Además se hace referencia al avance en Sistemas de Información Geográfica y su utilidad en modelos de escurrimiento de tipo distribuido.

El Capítulo II, revisa los conceptos bases de la formación de las nubes de tormenta, su clasificación y teorías de formación.

Las características de las tormentas en Quito, son presentadas en el Capítulo III, tomando en cuenta sus direcciones principales, su patrón temporal y su duración.

En el capítulo IV, se presenta el modelo de lluvia que considera un movimiento de tipo radial de avance del frente de lluvia. Considerando por un lado la distribución de la lluvia en el tiempo y espacio resultante de una nube de tormenta, y por otro, el efecto de los vientos de altura, que generan variaciones en la distribución de la lamina de lluvia a nivel de superficie. Se ha utilizado programación en lenguaje VisualBasic y Avenue (Arcview).

En el capítulo V, se ha incluido la aplicación del modelo de tormentas en un modelo precipitación escurrimiento de tipo distribuido. Se ha generado el modelo computacional de precipitación escurrimiento MISION, y se han simulado 3 escenarios de lluvias.

En el capítulo VI, se compara los resultados del modelo MISION con los del modelo HIDRO1, obteniéndose diferencias que generan conclusiones entre modelos de tipos distribuidos y convencionales.

El capítulo VII, presenta las conclusiones y recomendaciones.

## PRESENTACION

Esta tesis trata sobre la representación empírica de la distribución de la lamina de lluvia en el tiempo y en el espacio, generado por una nube de tormenta (célula de tormenta). Se fundamenta en la observación de 36 registros de lluvias extremas en seis estaciones pluviográficas ubicadas en el Distrito Metropolitano de Quito (Ecuador).

Se propone un modelo de lluvia que considera un movimiento radial de avance del frente de lluvia, tomando por un lado la distribución de la lluvia en el tiempo y espacio resultante de una nube de tormenta, y por otro, el efecto de los vientos de altura que generan variaciones en la presentación del modelo a nivel de superficie. Se ha generado el modelo TORMENTA, en lenguaje VisualBasic.

Adicionalmente, se ha desarrollado el modelo precipitación-escurrimiento de tipo distribuido denominado MISIÓN, que utiliza el modelo de lluvias propuesto y realiza de forma simplificada la acumulación en cauce y ladera del escurrimiento.

No se ha analizado tormentas formadas por varias células, esto, necesitaría renovadas energías en función de la aceptación del modelo propuesto.

Se entrega por tanto un modelo de lluvias flexible, que si bien ha surgido de observaciones realizadas en Quito, puede utilizarse en otras latitudes.

# **CAPITULO 1**

## **GENERALIDADES Y CONCEPTOS**

### **1.1 INTRODUCCION, ALCANCE DEL TRABAJO Y LIMITACIONES**

La determinación de los caudales en secciones o puntos de interés del sistema hidrográfico, es necesaria para el diseño de proyectos de aprovechamiento del agua. A pesar de que el país dispone desde 1960 de una red estaciones hidrométricas para el registro de niveles y caudales, la información hidrológica es insuficiente, y en muchos casos escasamente confiable, para sustentar los cálculos ingenieriles.

Por ello, en la toma de decisiones los profesionales acuden al uso de métodos indirectos de determinación de variables hidrológicas, en base a registros pluviométricos y datos físico-geográficos de las cuencas hidrográficas. Desarrollos técnicos más avanzados simulan, a través de modelos, el comportamiento de una cuenca hidrográfica, representando los almacenamientos de humedad y los procesos hidrológicos asociados.

La simulación o modelación de un fenómeno hidrológico, consiste en la representación analógica o matemática de los procesos físicos asociados, con la finalidad de entender o conocer su comportamiento. El análisis sistémico, en general, facilita la representación de los fenómenos físicos, puesto que sin mayor dificultad se puede identificar el impulso, los procesos internos y la respuesta.

Los modelos matemáticos, entendidos como un conjunto articulado de relaciones numéricas, tratan de representar un fenómeno físico determinado, generalmente complejo, consideran los factores de mayor importancia en un sistema cerrado de tipo causa – efecto. En la definición del modelo y en su formulación matemática,



se hacen simplificaciones, se asumen ciertas consideraciones entre las variables físicas y se introducen limitaciones en las mismas.

Los modelos precipitación-escorrentía son ampliamente utilizados en la práctica ingenieril universal, para la determinación de caudales. El método racional es el modelo de eventos de mayor difusión para la determinación de los caudales máximos de cuencas hidrográficas de micro escala.

En tanto, los modelos continuos de simulación de cuencas hidrográficas, que integran procesos y variables climáticas, físico-geográficas, hidrológicas, ambientales, de erosión y transporte de sedimentos, de transporte de contaminantes, etc., son muy complejos, y requieren para su desarrollo y aplicación, de amplias facilidades técnicas y científicas. Es el caso del Sistema Hidrológico Europeo – SHE.

La estructura de los modelos precipitación - escorrentía de eventos, incluye la representación de los siguientes fenómenos físicos:

- Distribución espacial y temporal de las lluvias intensas.
- Infiltración y formación de la precipitación efectiva; y,
- Formación del escorrentía.

En los modelos precipitación-escorrentía, la lluvia es definida como la causa, el pulso que genera el movimiento de este complejo fenómeno, que incluye la distribución de la humedad en las distintas formas de almacenamiento, y en los procesos infiltración y escorrentía, que varían notablemente en el tiempo. En consecuencia, la forma de representar la precipitación de forma uniforme o distribuida en el espacio y en el tiempo, sin duda constituye un elemento fundamental en la concepción del sistema y en la respuesta del mismo.

El interés de representar la forma en que una lluvia intensa o tormenta se presenta en el tiempo y en el espacio, y su influencia en los modelos de

precipitación – escurrimiento, es la justificación suficiente y necesaria para sustentar la presente investigación.

La caracterización o identificación de los comportamientos básicos de la lluvia se aborda desde un punto de vista empírico. Es decir, con base a la observación de registros de lluvias simultáneas, se sugiere un modelo numérico, dependiente de parámetros empíricos, para permitir obtener una distribución de la precipitación que concuerde con las observaciones históricas.

El alcance de la presente investigación no incluye en detalle el análisis de la precipitación como un proceso asociado a la dinámica de la atmósfera; en donde, la humedad, temperatura, presión, entre otros factores, son dependientes de la altitud e influyen notablemente en la formación de las nubes. Tampoco incluye la sinóptica del clima, como forma de predecir la ocurrencia de las lluvias intensas.

En resumen, como resultado de la presente investigación se propone un modelo que describe la formación de la lluvia respecto del tiempo y espacio. Asume, en calidad de hipótesis básica, que todos los puntos situados a un mismo radio del centro de tormenta tienen las siguientes características:

- El mismo tiempo de inicio de lluvia
- El mismo tiempo de fin de lluvia
- Igual lámina de precipitación
- Similar distribución temporal (patrón de tormenta) de la precipitación.

Esta hipótesis cambia cuando se procede a desplazar el centro de tormenta en cierta dirección, con una velocidad correspondiente al movimiento de los vientos locales, de acuerdo a la fecha de registro de la lluvia modelada.

La inclusión del movimiento de la tormenta por acción del viento genera una amplia gama de resultados, puesto que, por ejemplo, la precipitación varía



registradas en Quito, utilizando un procedimiento de minimización del error entre pluviogramas observados y simulados. En el mismo Capítulo 4 se incluye un análisis de sensibilidad de las variables y parámetros representativos de una tormenta dentro del modelo.

En el Capítulo 5 se aplica, para diferentes escenarios de lluvias, el modelo propuesto sobre la microcuenca de la Qda. Rumipamba; con este fin se divide la cuenca hidrográfica en celdas cuadradas o parcelas, sobre las cuales se aplica el modelo de lluvias. Sobre esta base y con ayuda de aplicaciones SIG se obtienen hidrogramas de crecidas.

En el Capítulo 6 se comparan los resultados del modelo propuesto con distribuciones gráficas del caudal, obtenidos aplicando el concepto de hidrogramas unitarios sintéticos. Los resultados y recomendaciones se incluyen en el Capítulo 7.

## **1.2 SISTEMAS**

Chow (1964)<sup>25</sup> definió a un sistema como la agregación o ensamblaje de partes, estando estos objetos o conceptos unidos por alguna forma de interacción regular o interdependiente.

Bogardi (1994) define a un sistema como un modelo de la realidad, con un número finito de elementos interrelacionados que interactúan unos con otros de una manera regular e interdependiente<sup>10</sup>.

### **Función del sistema**

La función del sistema  $H$  es la representación matemática de los procesos que relacionan los estímulos y respuestas.



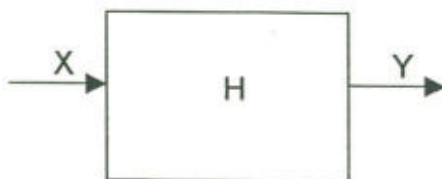

**Fig.Nº.1.1:** Representación esquemática de un sistema(tomado de Singh.1986)

X, es el ingreso o estímulo

Y, es la respuesta de H sobre X

H, es la función del sistema que opera sobre X

La función H, puede representar una cuenca hidrográfica, un tramo de un canal, un reservorio, el almacenamiento subsuperficial, etc.

X y Y, pueden ser también funciones y H un operador que modifica la función X para hacerla Y.

### **Variable<sup>25</sup>**

Una variable es una característica de un fenómeno representado dentro de un sistema, es factible de medición o estimación. Toma distintos valores en diferentes tiempos o espacios. Ejemplo: lámina de evaporación, lamina de precipitación, caudal, lámina de escurrimiento.

### **Parámetro<sup>25</sup>**

Un parámetro es una característica de un sistema, que puede o no permanecer constante en el tiempo. La conductividad hidráulica, coeficiente de rugosidad de Manning, tiempo de concentración y los coeficientes en el método de Muskingun, son algunos ejemplos.

## Estado<sup>25</sup>

El estado de un sistema obedece al conjunto de variables y parámetros considerados o asumidos; en consecuencia, un cambio en cualquier variable o parámetro del mismo produce un cambio de estado. En hidrología, el objetivo frecuentemente es determinar el estado o condición del sistema, en algún tiempo posterior, a partir del conocimiento del estado inicial o presente.

## Modelo

Es una representación simplificada de un sistema, que incorpora la representación de algunos procesos, generalmente los más importantes, pero no necesariamente todos. Generalmente las respuestas del modelo son semejantes pero no iguales.

### 1.2.1 TIPOS DE MODELOS DE SIMULACIÓN HIDROLOGICA

Se presentan algunas de las clasificaciones más importantes. Se citan las que se consideran más trascendentes y que incluyen al modelo propuesto de lluvia.

Una de las primeras clasificaciones separa los modelos en **físicos** y **matemáticos**. Los modelos físicos, generalmente incluyen tecnología y conceptos de simulación aplicados a modelos de pequeña escala. En contraste, los modelos matemáticos se fundamentan en conceptos matemáticos para representar un sistema. La teoría del hidrograma unitario es por ejemplo un modelo matemático de la respuesta de una cuenca a varias tormentas con exceso de precipitación.

Una segunda clasificación<sup>26</sup> subdivide a los modelos como **continuos**, debido a que el proceso ocurre y es observado continuamente en el tiempo. No obstante, con frecuencia, la solución matemática exige la división de los espacios y tiempos



en intervalos finitos, dando lugar a modelos **discretos**. Un ejemplo de este tipo de modelos es la representación del transito de una crecida en un reservorio, en intervalos de tiempo igualmente espaciados.

Los procesos que consideran variables dependientes del tiempo pueden ser representados con modelos **dinámicos**. Los modelos que tratan fenómenos independientes del tiempo, son frecuentemente llamados **estáticos**.

Los modelos de simulación se subdividen también en **empíricos**, **conceptuales** y **teóricos**. El primer tipo de modelo es el de mayor aplicación y es de particular interés, en la hidrología aplicada. El objetivo de estos modelos empíricos es el de generar resultados sobre fenómenos observados mediante algunas relaciones matemáticas en función de los datos de entrada. Un modelo empírico no necesariamente se sustenta en relaciones físicas. Un ejemplo típico de este tipo de modelos es el método racional. Los modelos empíricos no ayudan a comprender las leyes físicas, contienen parámetros que pueden tener un pequeño significado físico directo y que pueden ser evaluados usando mediciones de las variables de ingreso y de salida. Por otra parte, los modelos conceptuales se basan en la teoría para interpretar los fenómenos en lugar de representar el proceso físico. Un ejemplo de modelo conceptual es el modelo basado en la teoría de la probabilidad. Generalmente estos modelos consideran las leyes físicas en forma simplificada. Un ejemplo de esta categoría de modelos es el modelo de Nash (1958). Los modelos conceptuales contienen parámetros, los cuales pueden tener significado físico directo, y pueden ser estimados usando observaciones directas en la naturaleza.

Los modelos teóricos son la consecuencia de considerar las leyes más importantes que gobiernan el fenómeno. Un modelo teórico tiene una estructura lógica similar al sistema del mundo real; generalmente este modelo requiere de más información que un modelo empírico. Ejemplos de estos modelos son: representación del escurrimiento en función de la ecuación de St. Venant, análisis



de la infiltración considerando la teoría de flujo entre fases, la estimación de la evaporación sustentada en la teoría de turbulencia y difusión.

Los modelos que ignoran la variación espacial de los parámetros en todo el sistema son clasificados como modelos de **parámetros agrupados**. Un excelente ejemplo es el hidrograma unitario para predecir la distribución en el tiempo del escurrimiento superficial para diferentes tormentas, en un área de drenaje homogénea. El parámetro agrupado es el tiempo de concentración, el cual se mantiene constante para todas las tormentas.

Los modelos de **parámetros distribuidos** estiman la variación del comportamiento de un punto a otro, a través de todo el sistema. Un ejemplo es dividir la cuenca hidrográfica en parcelas o celdas, y en cada una de ellas, con sus propios parámetros, calcular los hidrogramas de crecidas y luego integrarlos en una sección de control aguas abajo. En general, este tipo de modelos es utilizado en este trabajo de investigación.

Los métodos estadísticos en hidrología comprenden por una parte las técnicas de regresión y correlación, que establecen la relación funcional entre los datos medidos experimentales o históricos. Estos análisis son hechos generalmente en series discontinuas o discretas de tiempo, valores medios o totales de algunas variables para intervalos definidos de tiempo. Por otra parte, los métodos probabilísticos introducen el concepto de frecuencia o probabilidad; los estimados de probabilidad de eventos extremos se basan en el conocimiento de las características estadísticas de las series muestrales disponibles<sup>1</sup>

La tercera categoría de métodos estadísticos son los métodos estocásticos, que tratan la secuencia de eventos como dependientes del tiempo.

Un sistema puede ser analizado en mayor detalle, si el período de tiempo investigado es corto. Muchos modelos hidrológicos de corto tiempo se pueden clasificar en modelos de **eventos**, en contraste, con modelos **secuenciales o continuos**. Los modelos de eventos permiten cierta flexibilidad en el uso de

parámetros distribuidos y el intervalo de discretización del tiempo. Un modelo típico de simulación de eventos genera ingresos y salidas de un reservorio para una tormenta aislada, usando un intervalo de tiempo de 10 minutos, 1 hora, etc.

Los procesos que involucran cambios de sus características principales en el tiempo, pueden ser representados por modelos **dinámicos**. En cambio, los modelos que representan procesos independientes del tiempo son frecuentemente llamados **estáticos**<sup>26</sup>.

Como se describe en el Capítulo 4, el modelo propuesto que trata de representar la ocurrencia de las precipitaciones intensas en el tiempo y en el espacio, corresponde a:

- Modelo Empírico: porque sin entrar a definir los procesos internos, describe la forma de la distribución de las lluvias intensas en el tiempo y en el espacio.
- Modelo matemático: utiliza algoritmos y formulaciones matemáticas para generar el modelo y para posteriormente representar la interacción de variables.
- Modelo discreto: analiza la formación de la tormenta en el tiempo, en intervalos igualmente espaciados.

La aplicación de este modelo de lluvias en una cuenca de estudio posibilita la aplicación de otro tipo de modelos:

- De parámetros distribuidos: la simulación de la lluvia en tiempo y espacio genera, para cada uno de los puntos de división de la cuenca, una cantidad de lluvia con un patrón de formación en el tiempo. En la aplicación del modelo, cada celda de división de la cuenca debe tener los respectivos parámetros necesarios en la representación del evento.



### 1.3 VENTAJAS Y DESVENTAJAS DE LA SIMULACION

#### Ventajas

La representación matemática de un proceso hidrológico tiene algunas importantes ventajas, entre las cuales se precisa las siguientes:

- Permite realizar modificaciones en los componentes del sistema modelado, incorporando parámetros y opciones en las ecuaciones aplicadas, generando respuestas rápidas, y facilitando el análisis de resultados;
- Se aprovecha la experiencia generada en la recopilación, organización de datos, formulaciones conceptuales y algoritmos, para reproducir ciertas tendencias observadas en el prototipo.
- Quizás el mayor beneficio de la modelación radica en la posibilidad de reproducir resultados de fenómenos o sistemas, que en el pasado <sup>desarrollado</sup> no han ocurrido.

#### Desventajas

- En general, la modelación supone una simplificación del sistema real, permitiendo con esto cierto error o distorsión en los resultados. La prueba de que un modelo de simulación desarrollado es útil, consiste en la verificación mediante pruebas de validación, de que el comportamiento reproducido es consistente con el fenómeno que trata de representar.
- Otra limitación se presenta respecto de la excesiva confianza basada en sofisticadas salidas o respuestas, cuando los datos de entrada, son inadecuados.



- En general se aprecia la tendencia a suprimir o limitar las investigaciones en el medio real o en laboratorio, bajo el supuesto de que los modelos son apropiados y de menor costo.

## 1.4 EL PROCESO PRECIPITACIÓN-ESCURRIMIENTO

El Ciclo Hidrológico, se entiende como el conjunto de procesos que interactúan y permiten el movimiento y renovación del agua contenida en la atmósfera, en la superficie terrestre, en los océanos y mares, en el subsuelo. Este ciclo en general comprende la circulación del agua desde los océanos hasta la atmósfera, luego a los continentes y nuevamente a los océanos.

Los principales procesos físicos que son parte del Ciclo Hidrológico son: evaporación, transpiración, circulación del aire, precipitación, retención superficial, infiltración, escurrimiento superficial, escurrimiento subsuperficial, flujo base y esorrentía. El agua ocupa la capacidad de almacenamiento que encuentra en su recorrido, bajo las condiciones imperantes de temperatura y presión. De esta forma, toma el estado líquido en océanos, lagos, embalses, ríos y acuíferos; el estado sólido, en los glaciares y en los nevados; el estado gaseoso, en la atmósfera y los estados sólido y líquido, en las nubes (Figura 1.2). El ciclo del agua puede ser representado como un Sistema Hidrológico, con los componentes antes indicados.

Un elemento particular del Sistema Hidrológico es el subsistema precipitación - escurrimiento, que en su orden tiene los siguientes componentes: precipitación, interceptación, infiltración, escurrimiento superficial, escurrimiento subsuperficial, flujo base, evapotranspiración y almacenamiento en depresiones. La lluvia efectiva corresponde al escurrimiento superficial y subsuperficial (Figura 1.3).

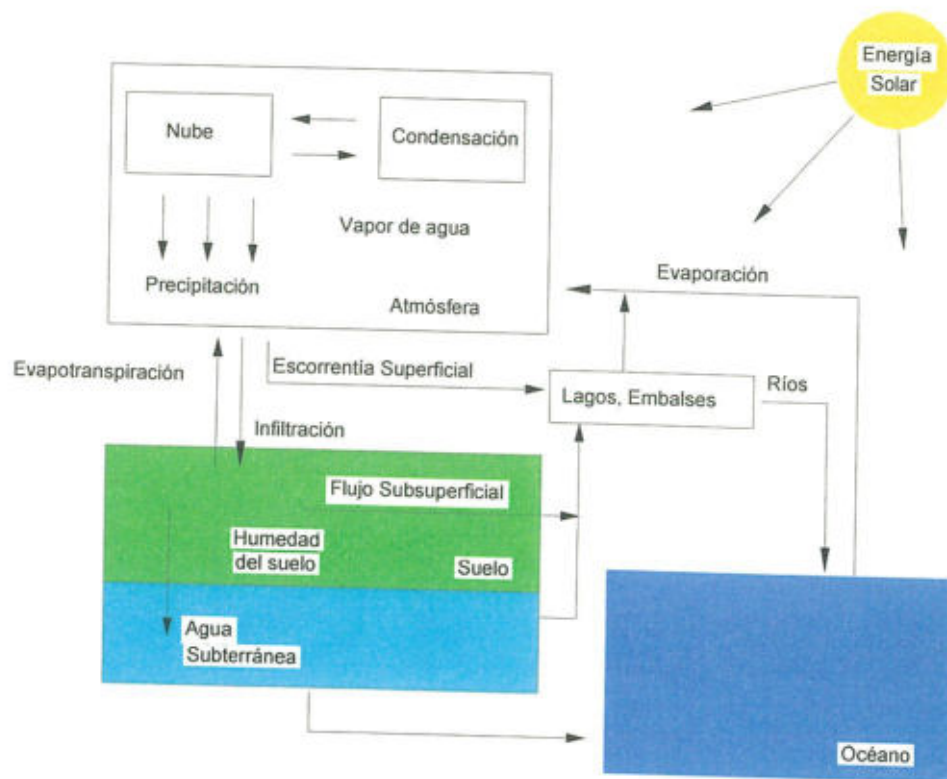

**Fig.N°.1.2:** Ciclo Hidrológico (tomado de Silva, 2002)

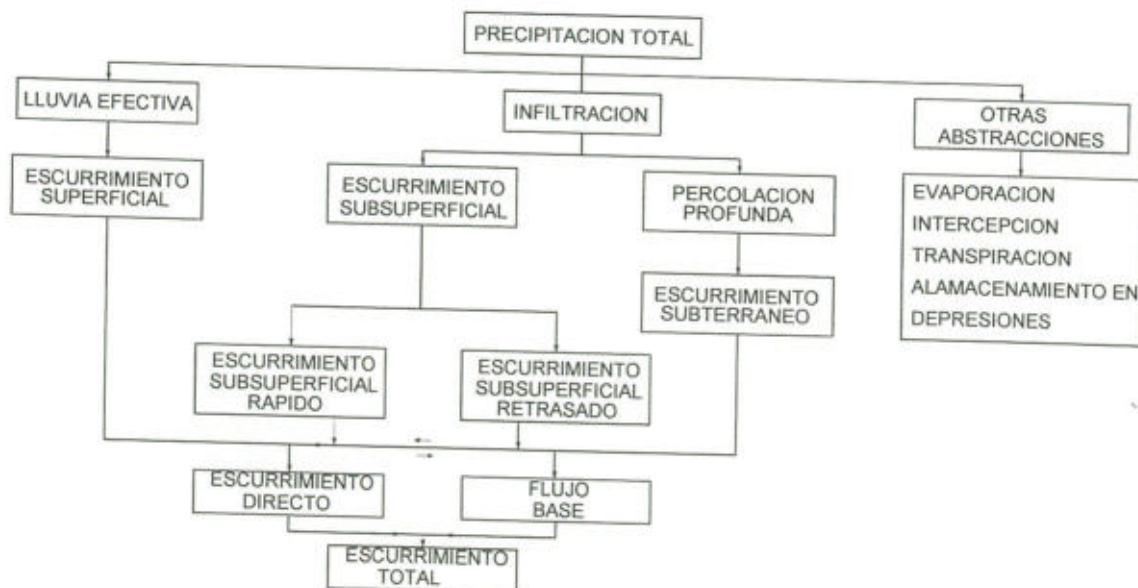

**Fig.N°.1.3:** Representación del sistema precipitación – escurrimiento (tomado de Singh, 1986)

Durante un evento de lluvia de alta intensidad y corta duración, la interceptación, evapotranspiración y almacenamiento en depresiones normalmente constituyen una pequeña parte de la lámina total precipitada<sup>25</sup>, siendo estos elementos generalmente ignorados o agrupados y considerados como parte de las pérdidas por infiltración. La Figura 1.4, representa al sistema precipitación – escurrimiento, para eventos de lluvia de corta duración.

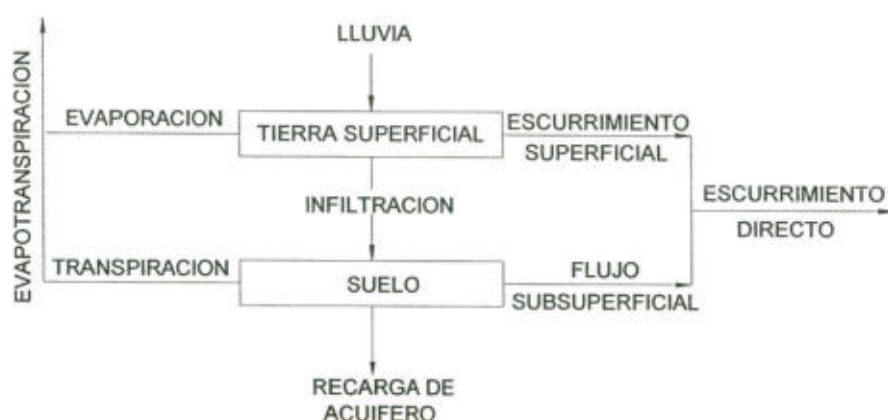

**Fig.Nº.1.4:** Representación simplificada del sistema precipitación - escurrimiento (tomado de Singh,1986)

## 1.5 TORMENTA O LLUVIA CRITICA

La tormenta o lluvia crítica es una forma representativa, para un lugar geográfico específico, de la variación de la lámina de precipitación o intensidad de lluvia en el tiempo. Esta forma generalmente se asocia a probabilidades o períodos de retorno determinados, y son útiles para generar hidrogramas de crecidas a considerar en el diseño de obras hidráulicas.

La obtención de la tormenta, conlleva la determinación de<sup>26</sup>:

- La duración de la lluvia, que es la diferencia entre el tiempo de inicio y fin del evento.
- La distribución temporal de la intensidad de la tormenta.



- La distribución espacial (areal) de la intensidad de la lluvia crítica que varía conforme se desarrolla el evento en el tiempo.
- La intensidad media o la lámina de precipitación acumulada en función de la probabilidad o del período de retorno.
- La lámina de lluvia acumulada en relación con el área de cobertura de la tormenta.

### **Duración de la tormenta de diseño**

La duración de una tormenta crítica corresponde al tiempo de ocurrencia de un evento de lluvia intensa, generalmente representado mediante hietogramas (gráficos de barras) de intensidades de lluvia o de láminas de precipitación, variables en intervalos de tiempo, en que se subdivide la duración total del evento.

La duración de la precipitación de eventos reales se determina mediante análisis estadístico de pluviogramas. En aplicaciones para determinación de caudales máximos, se suele aceptar la condición crítica de aporte simultáneo de toda la cuenca, concepto aceptado como tiempo de concentración hasta la sección de interés de una cuenca. La duración de la lluvia de diseño está fuertemente ligada a los objetivos del estudio y a las metodologías de aplicación de modelos precipitación - escurrimiento.

### **Distribución temporal de la lluvia**

La distribución temporal se refiere a la variación de la precipitación o de la intensidad de lluvia, conforme se desarrolla un evento de lluvia. Esta distribución es característica de cada lugar geográfico, puesto que obedece a la circulación de la atmósfera, que está fuertemente condicionada por la orografía, en zonas de montaña. La forma de la precipitación, en cuanto a intensidad y duración, depende del mecanismo de ascenso de la humedad, es decir, se tiene precipitaciones convectivas y orográficas, caracterizadas por intensidades fuertes

y duraciones cortas; mientras que las lluvias frontales se manifiestan como lluvias de larga duración y baja intensidad.

Para favorecer la generalización del análisis de las formas de distribución de la precipitación en el tiempo, se suelen presentar estas formas en términos de gráficas de precipitaciones acumuladas versus tiempo, en porcentaje. La Figura 1.5 muestra un ejemplo de dicha distribución.

Algunos estudios relacionan la distribución temporal con cierto grado de probabilidad de presentación. Entre ellos se tiene los aportes de Huff, 1967<sup>26</sup>, y Beltrán, 1996<sup>6</sup> que presentan el análisis de frecuencias de las distribuciones temporales de lluvias intensas de Quito.

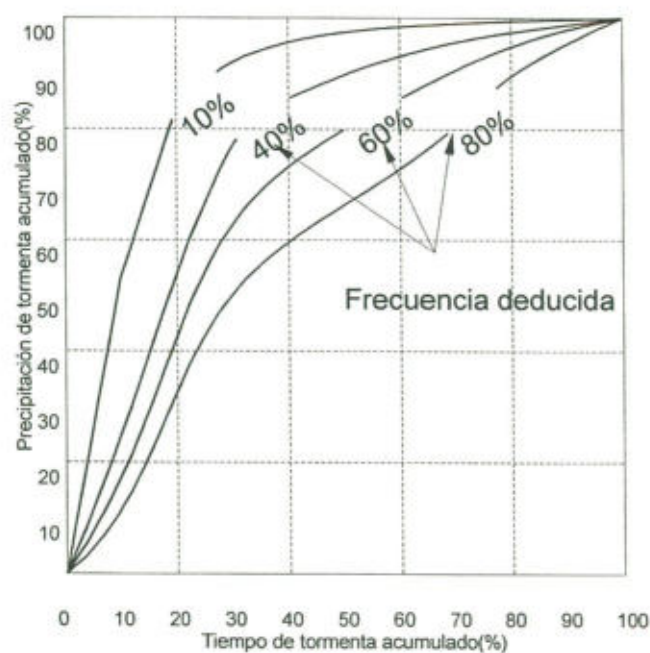

**Fig.N°.1.5:** Distribución temporal de la precipitación(tomado de Viessman, et al. 1977)

### Distribución areal de la precipitación

Dentro del área de influencia de una tormenta tanto la altura de precipitación acumulada como las intensidades de lluvia varían de un punto a otro. Este fenómeno en las aplicaciones prácticas generalmente no se toma en cuenta<sup>26</sup>; el efecto puede ser entendido como despreciable en la determinación de caudales máximos de cuencas de áreas pequeñas, pero no en cuencas de tamaño mayor a  $10 \text{ km}^2$ , para las cuales la adopción del Método Racional no es recomendable. Generalmente se seleccionan diferentes precipitaciones al interior del área, correspondientemente a las estaciones existentes, y se generaliza su distribución mediante el trazado de isoyetas, para llegar a definir la precipitación media.

Huff (1967) en sus análisis de tormentas en el medio oeste de Estados Unidos<sup>26</sup>, determinó cuatro importantes patrones areales, que se indican en la Figura 1.6. Las letras A y B, representan las zonas con alta y baja precipitación respectivamente.

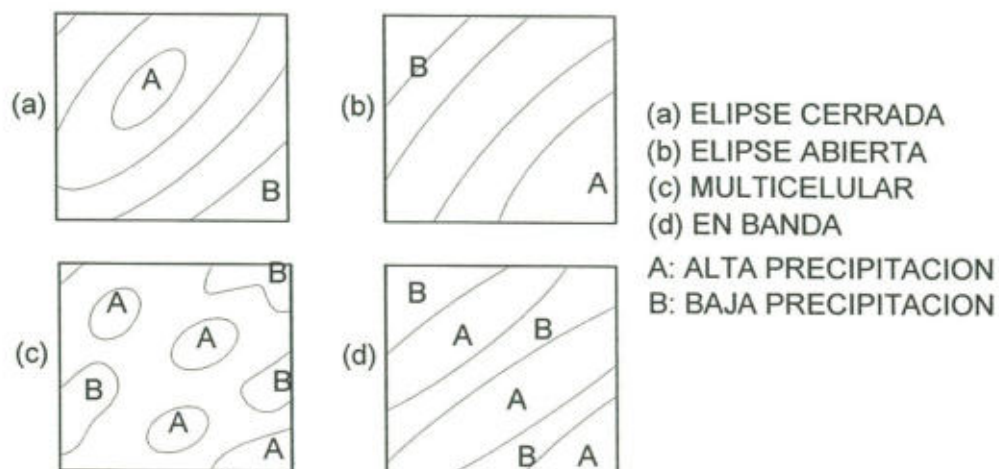

**Fig.Nº.1.6:** Distribución Areal de la precipitación según Huff (1967),  
 (tomado de Viessman et al. 1977)



## Altura de precipitación

La lámina de lluvia media para una cuenca hidrográfica se obtiene en función de una probabilidad dada y de una duración de lluvia de las curvas Intensidad-Duración-Frecuencia.

## Disminución de intensidad media con relación al área de cobertura

La afectación del tamaño del área de la cuenca sobre la precipitación acumulada media o intensidad media de un evento de lluvia intensa se recomienda realizar para aquellas cuencas con áreas mayores a 25 km<sup>2</sup>, como lo realiza el U.S. Weather Bureau<sup>26</sup>. La afectación consiste en disminuir la intensidad puntual media, asociada a un período de retorno, con relación al aumento del área de la cuenca, bajo el supuesto de que la intensidad de lluvia disminuye desde el centro de tormenta en dirección de su periferia.

La disminución se puede representar con relación a la intensidad de diseño (*io*) obtenida de las curvas Intensidad-Duración-Frecuencia. El U.S. Weather Bureau desarrolló una guía para la reducción de la altura de lluvia de diseño a la altura de lluvia media para áreas menores a 1000 Km<sup>2</sup>, ver Figura 1.7.

Otra curva que representa la disminución de la intensidad media de lluvia desde el centro a la periferia, la presentó Monsalve<sup>22</sup>, (1995);

$$im = io (1 - 0.0072 \cdot \sqrt{r}) \quad (1.1)$$

En donde;

*r* = distancia al centro de la tormenta (m) y *r* < 12000 m

*im* = intensidad media de lluvia

*io* = intensidad en el centro de la tormenta

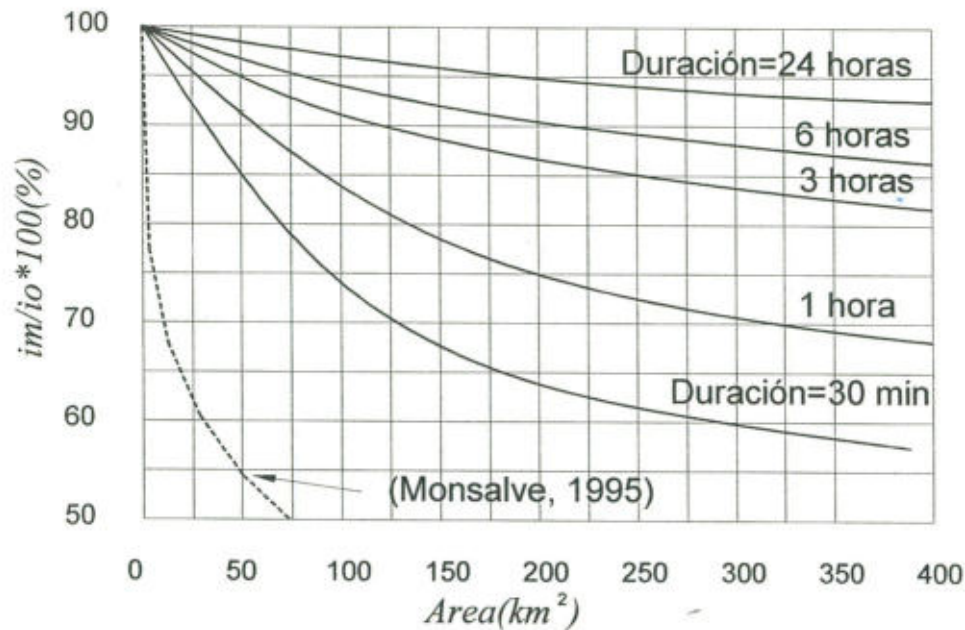

**Fig.N°.1.7:** Lluvia media con relación al área de cobertura( adaptado de Viessman et al. 1977)

La posibilidad de uniformizar lluvias intensas sobre toda la cuenca no es justificable para grandes cuencas. La influencia de la variación del patrón temporal y espacial deberá ser considerada en modelos de simulación lluvia-escurrimiento<sup>26</sup>.

## 1.6 SISTEMAS DE INFORMACIÓN GEOGRAFICA (SIG) Y MODELOS DISTRIBUIDOS

Un sistema de información geográfica (SIG) es:

“Conjunto de elementos de hardware, software y de procedimientos diseñados para adquirir, administrar, manipular, modelar y visualizar datos referenciados en el espacio para resolver problemas complejos de administración y planificación” (Wibold, 2000<sup>27</sup>).

Este enfoque resulta de interés, puesto que destaca el hecho de que un SIG depende de elementos físicos y de operaciones adicionales particularizadas que permiten ampliar la capacidad de aplicación del software. La característica esencial del un SIG es la capacidad de modelación espacial.

Un SIG tiene dos características:

- Posee una base de datos geográfica grande y accesible que permite su investigación en forma ordenada. Para ello cuenta con una relación al nivel de registros de bases de datos que permite realizar consultas complejas.
- Cuenta con un sistema de cartografía automatizado orientado al análisis espacial. Esto permite realizar operaciones espaciales y el procesamiento de imágenes.

Estas características en conjunto permiten que un SIG pueda procesar consultas espaciales, cambiar los niveles de agregación de la información, estimar parámetros y establecer restricciones para la simulación espacio-temporal de fenómenos sobre la superficie terrestre, analizar redes, sobreponer mapas y datos, cambiar escalas, efectuar análisis estadísticos y generar nueva información, entre otras propiedades.

### **Paquete de software de un SIG.**

El software de un SIG está constituido por varios componentes con funciones específicas. El sistema en conjunto permite ejecutar tareas básicas de ingreso, verificación y almacenamiento de datos, manejo de la base de datos, transformación de la información y representación de los datos. Todas estas labores son realizadas gracias a las funciones de cada módulo y su interacción con los otros (Figura 1.8).



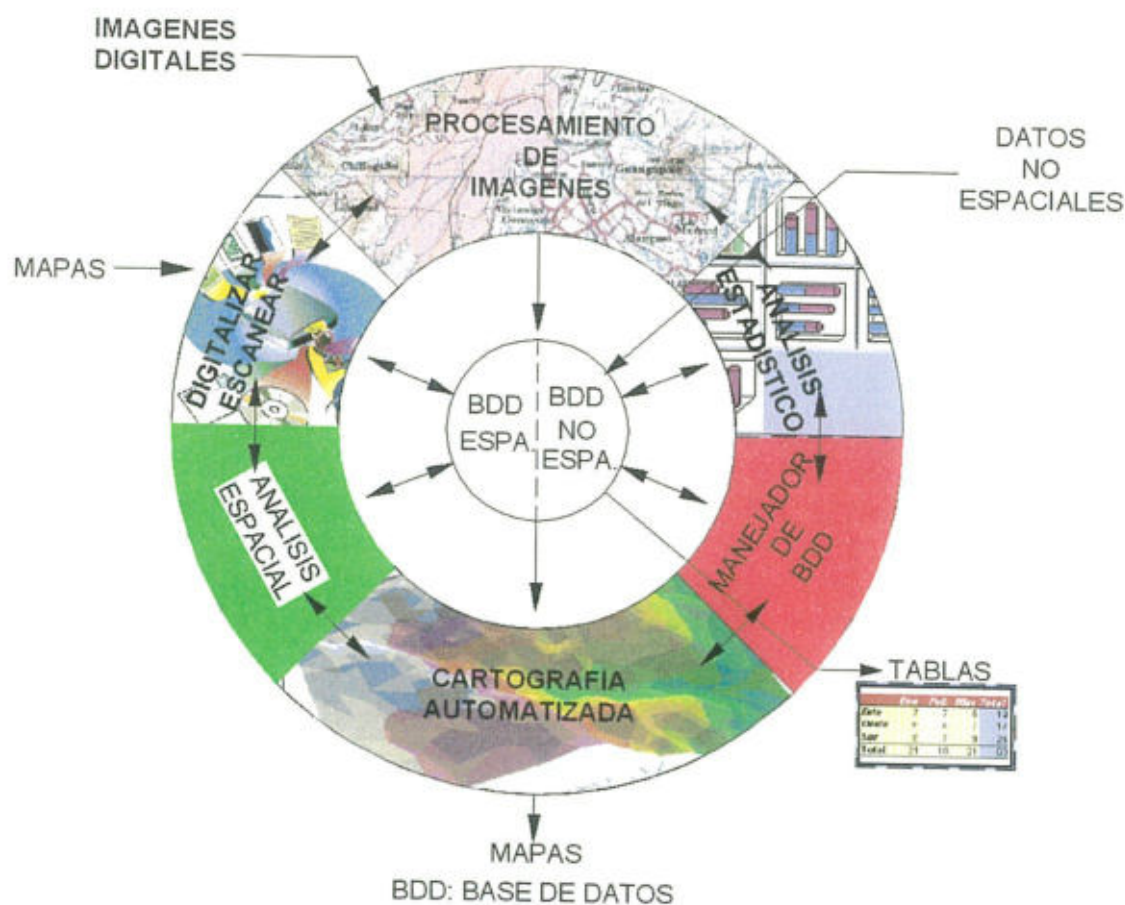

**Fig.Nº.1.8:** Componentes del Software en un sistema de información geográfica(Adaptado de Manual de ArcView 32, UNISIG,2000)

La evolución de las investigaciones hidrológicas y el rápido desarrollo de la tecnología de la computación tanto en software como en hardware, han posibilitado el estudio de complejos fenómenos físicos basados en modelos distribuidos, tanto para componentes hidrológicos particulares como para una cuenca completa.

## MODELOS DIGITALES DE ELEVACIÓN

Un modelo de elevación digital (MED) es una matriz ordenada de números que representan la variación de la altitud o cota del terreno. El MED puede consistir de

cotas de puntos discretos o en cotas promedio sobre un segmento específico de terreno.

Los <sup>ED</sup>MDE constituyen parte de los Modelos Digitales de Terreno (MDT) que pueden ser definidos como un conjunto de arreglos ordenados de números que representan la distribución espacial de los atributos del terreno<sup>22</sup> (Figura 1.9).

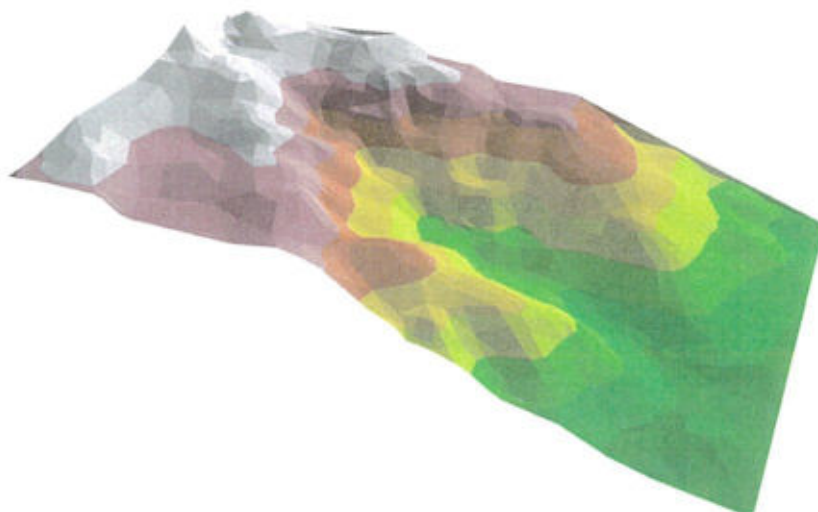

**Fig.Nº.1.9: Modelo Digital de Elevación (Cuenca de la Qda. Rumipamba)**

### **Red de datos para un modelo digital de elevación**

La estructura de un MDE puede diferenciarse de acuerdo al objetivo que se persigue, en función de que si el MDE es utilizado como estructura de un modelo hidrológico dinámico o si es usado para determinar los atributos topográficos de una zona de interés.

Existen tres maneras principales de estructurar una red de datos de elevación para su acceso y análisis (Figura 1.10).

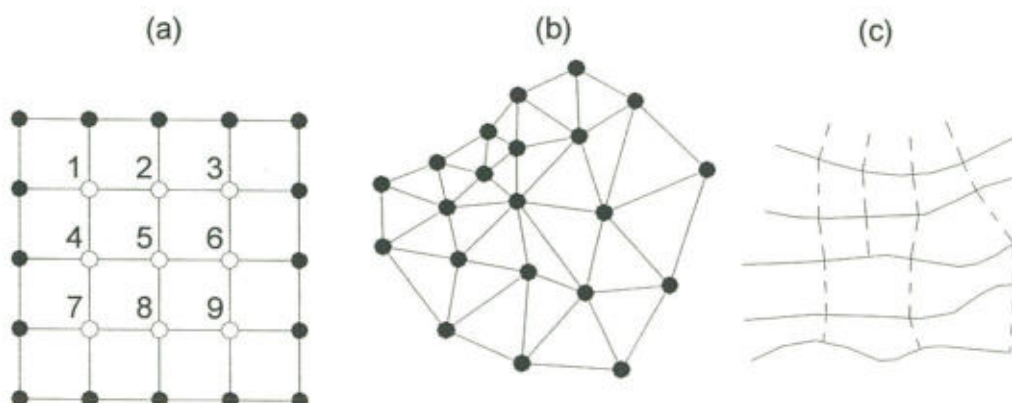

**Fig.Nº.1.10:** Estructura de redes de datos de elevación. (a) Estructura en mallas cuadrada indicando el movimiento de una submatriz de 3x3 centrada en el nodo 5. (b) Estructura triangular irregular. (c) Red basada en contornos (Tomado de Moore, Grayson y Ladson , 1990).

Las redes de triángulos irregulares (TIN) usualmente indican puntos específicos de una superficie (tales como picos, crestas, cambios en pendiente) en forma de una red de puntos almacenados como un grupo de coordenadas X, Y, Z junto con nodos de la red vecina. El área elemental es el plano resultado de la unión de tres puntos adyacentes y se le conoce como cara. Los métodos basados en mallas pueden usar una red con un espaciado regular en forma triangular, cuadrada, o rectangular. El área elemental es una celda formado por tres o cuatro puntos adyacentes para una red triangular o rectangular, respectivamente. Los métodos basados en contornos consisten en líneas de contorno digital y son guardadas como Gráficos Digitales de Líneas (GDL), en pares de coordenadas X, Y, a lo largo de cada línea de contorno de una elevación dada. Estas pueden ser usadas para subdividir un área en polígonos irregulares bordeadas por líneas de contorno y líneas de flujo o gradiente (ortogonales a líneas de contorno).

La estructura de datos comúnmente más utilizada es la red de mallas de elementos cuadrados porque son fáciles de implementar y tienen alta eficiencia



computacional. Sin embargo, este procedimiento tiene muchas desventajas, a saber<sup>23</sup>:

- No se puede manejar fácilmente cambios abruptos en la elevación,
- El tamaño de la malla afecta el resultado obtenido y la eficiencia en el cálculo,
- El flujo calculado aguas arriba, usado en evaluaciones hidrológicas, tiende a zigzaguear lo que convierte en irreal la simulación,
- Existe una falta de precisión en determinar las áreas de una cuenca específica, debido a que celdas regulares deben ser ajustadas a la irregularidad del terreno. Esta contradicción puede ser importante en terrenos planos.

Los atributos de topografía tales como pendiente, área de una cuenca, aspecto y perfiles pueden ser derivados en cualquiera de los tres tipos de MDE. La más eficiente estructura de MDE es generalmente el método basado en mallas. El método basado en contornos requiere mayor almacenamiento de datos que el método de las mallas y no produce ventajas computacionales. Con estructuras TIN, la irregularidad hace que la computación de los atributos de las denominadas caras sea más difícil que los métodos basados en mallas.

Para modelos hidrológicos dinámicos, se debe tomar en cuenta consideraciones importantes. Moore,(1990)<sup>23</sup>, menciona a Mark, (1978) quien concluye que la estructura de las mallas de datos de las particiones espaciales del terreno, no son apropiados para muchas aplicaciones geomorfológicas e hidrológicas. Se postula entonces que el fenómeno es el principal criterio que determina la estructura del modelo y no los problemas de datos o consideraciones de software y hardware.

Los modelos hidrológicos simulan el flujo relacionado con una superficie, así que las áreas elementales de los MDE, deberían reflejar este requerimiento. Los métodos de contorno tienen importantes ventajas al respecto, porque la estructura de sus áreas elementales se basa en la manera en que el agua fluye

por la superficie del suelo. Líneas ortogonales a las curvas de nivel son líneas de gradiente así que la ecuación que describe al flujo de agua se la puede reducir a una serie de ecuaciones unidimensionales conectadas.

### **Datos tipo Vector<sup>16</sup>**

Los datos tipo vector representan características y variaciones geográficas mediante puntos, líneas o áreas que especifican la localización o límites, y almacenan adicionalmente información sobre los objetos.

Los datos tipo vector son más apropiados cuando se necesita almacenar localizaciones precisas, modelos de conectividad a lo largo de una red tal como carreteras, redes eléctricas, etc. o trabajar con bordes exactos tales como la frontera entre dos países.

### **Datos tipo Raster<sup>16</sup>**

Los datos tipo raster representan características geográficas mediante la división de la zona de estudio en cuadrados discretos llamados celdas, para el cual se asocia un valor. La localización de cada celda es conocida mediante la localización del origen y la ubicación relativa al origen.

No se guarda la exacta localización de cada celda. Solamente se archivan el origen, tamaño de celda y número de celdas hasta el origen.

Un GRID, tal como se usa en análisis espacial de MDE, es un tipo especial de raster, en el cual el valor almacenado es un dato en una tabla que guarda información descriptiva adicional (Figura 1.11). Los datos raster son muy efectivos para el almacenamiento y superposición de capas (Layer, Shapes).

El tamaño de la celda constituye la unidad más pequeña para la representación de la variable en estudio, y es determinada por el nivel de exactitud requerido en los resultados.



Las celdas de tamaño más pequeño son más exactas en la representación, pero lamentablemente requiere el manejo de gran cantidad de datos en su proceso.

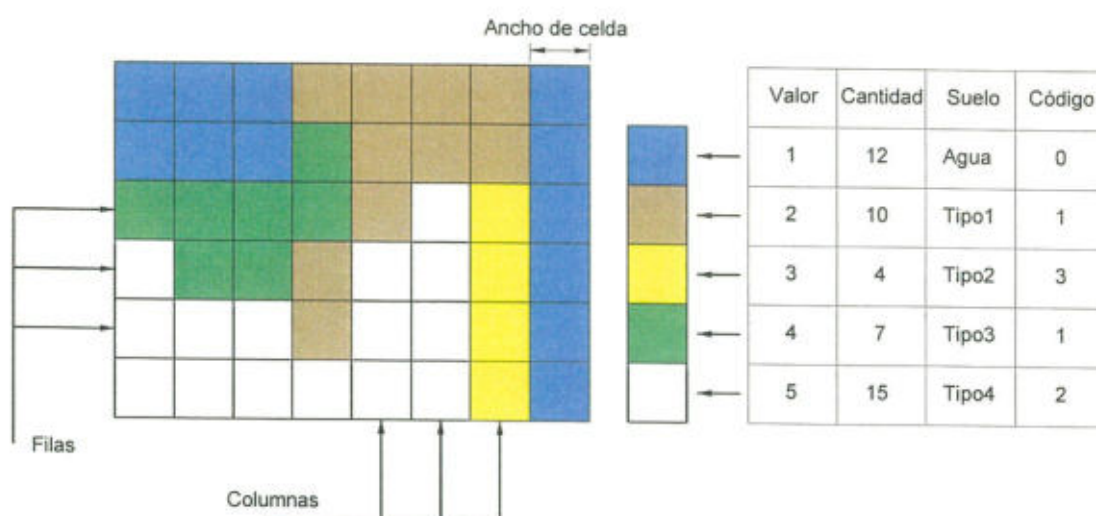

**Fig.Nº.1.11:** Estructura de datos raster en un SIG (Tomado de ArcView Spatial Analyst, 1996).

En el desarrollo de este proyecto de tesis se utilizó el paquete computacional ARCVIEW por ser la herramienta más apropiada para el objetivo de la modelación de lluvias, por su capacidad de manejo de información geográfica en formato raster como en formato vector, y por la facilidad que brinda en la utilización del lenguaje de programación interna AVENUE.

Se utiliza el formato de datos raster por ser el más apropiado para definir tanto la distribución de la lluvia en celdas como para el cálculo de la acumulación del escurrimiento directo.



## **CAPITULO 2**

### **BASE TEORICA Y ESTADO DEL ARTE**

#### **2.1 NATURALEZA DE LAS TORMENTAS**

El fenómeno indispensable para la formación de nubes es el mecanismo o proceso que permite el ascenso del aire. Cuando una parcela de aire asciende, pasa a regiones sucesivas de menor presión, como resultado el aire se expande y se enfría adiabáticamente.

En el nivel de condensación por ascenso de las masas de aire húmedo, la parcela alcanza la temperatura del punto de rocío, la humedad relativa aumenta hasta la saturación y si continua elevándose se produce la condensación y se formarán las nubes.

La humedad presente en la atmósfera está constituida por vapor, pequeñas gotas de agua o de diminutos cristales de hielo. La distribución de la humedad en la atmósfera está asociada con los procesos de circulación del aire, manifestados como corrientes y vientos. La condensación de la humedad atmosférica se presenta como precipitación en forma de lluvia, neblina, granizo, escarcha, nieve, rocío, que entran a formar parte del ciclo del agua a nivel de cuenca hidrográfica.

#### **CONDENSACION DEL VAPOR DE AGUA**

La condensación es la transformación del vapor de agua presente en las nubes en pequeñas partículas de agua o cristales, que por diversos mecanismos de agregación o crecimiento, pueden precipitarse.

- Para que se produzca la condensación del vapor de agua, el aire debe estar saturado de humedad, ya sea por enfriamiento o por incremento de

humedad. Estos dos procesos pueden producirse en forma independiente o simultánea. La condensación del vapor a nivel de superficie exige la presencia de una superficie sobre la cual se forma rocío.

- Para que la condensación se produzca en el aire deben haber partículas microscópicas en suspensión, que son las superficies sobre las cuales el vapor de agua puede aglutinarse. Estas partículas microscópicas se conocen como núcleos de condensación o higroscópicos.

### Núcleos de condensación

Actúan como núcleos de condensación todo tipo de impurezas en la atmósfera como partículas de sal, polvo, humo, polen, etc., que abundan en los estratos bajos de la atmósfera. Los núcleos de condensación son importantes, porque si no existieran, el vapor de agua no tendría una superficie donde condensar y la humedad relativa podría superar incluso el 100 %, dando lugar a masas de aire sobresaturado.<sup>18</sup>

Las partículas más efectivas como núcleos de condensación son las llamadas higroscópicas, es decir que acumulan humedad. Los núcleos higroscópicos más comunes son los cristales de sulfato y compuestos de nitrato, introducidos a la atmósfera principalmente por combustión vegetal y de combustibles fósiles de la industria. Además, las partículas de sal generadas por el rompimiento de las olas de los océanos. Su concentración es enorme, del orden de  $10^2 - 10^3$  núcleos/cm<sup>3</sup>.<sup>18</sup>

La condensación se inicia en los núcleos de condensación, inicialmente el crecimiento de las gotas es rápido, pero este disminuye en un corto tiempo, porque se consume rápidamente el vapor de agua disponible en la formación del gran número de gotas que se van formando. El resultado es la formación de una nube compuesta por billones de pequeñas gotitas de agua, que permanecen en suspensión en el aire, hasta que por un fenómeno de crecimiento de gotas, ya

sea por unión de gotitas o por sobresaturación del aire, adquieren el tamaño suficiente para precipitarse por gravedad. La diferencia de tamaño entre una gota de nube y una de lluvia se muestra en la Figura 2.1 (aproximadamente un millón de gotas de nubes forman una gota de lluvia<sup>17</sup>).

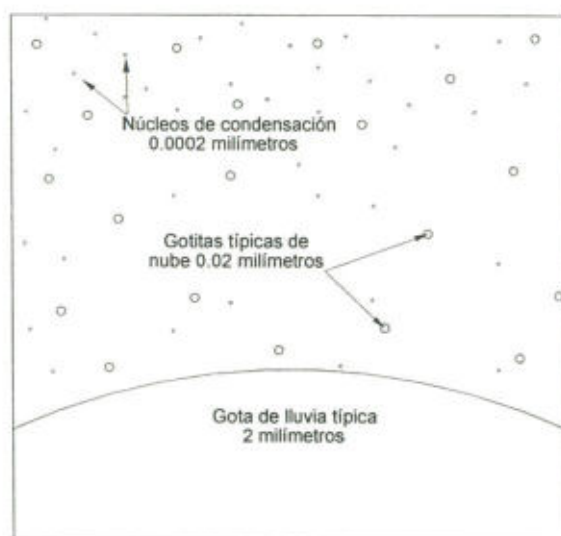

**Fig.Nº.2.1:** Tamaño relativo de los núcleos de condensación, gotas de nube y gotas de lluvia.(Inzunza J, 1980)

## FORMACIÓN DE LA PRECIPITACIÓN

Las gotas de nubes tienen un diámetro del orden de 20 micrómetros o 0,02 milímetros (el cabello humano tiene un diámetro de aproximadamente 75 micrómetros). Por ser muy pequeñas son muy ligeras y su velocidad de caída es muy baja. Una gota de agua está sometida a la gravedad y a medida que su velocidad aumenta mientras cae, la fuerza producida por el roce con el aire que la rodea, también aumenta, hasta que después de un corto tiempo equilibra al peso de la gota. Desde este momento la gota cae con una velocidad constante, llamada velocidad límite. En el cuadro 2.1 se presenta valores típicos para gotas esféricas.

Si la masa de aire tuviese movimiento vertical, la velocidad de las gotas tendría esa influencia. Una gota grande puede estar sostenida en el aire si la corriente



ascendente es de unos 10 m/s y las gotas pequeñas ascenderían entonces en la nube. Corrientes verticales de tales velocidades se producen generalmente en las tormentas. Cuando hay gotas de diferentes tamaños, sus velocidades de caída variarán en un amplio rango, lo que produce muchas oportunidades de choque entre ellas.

Las gotas de agua de diámetro mayor que 6 mm tienen velocidades de caída superiores a los 10 m/s. A velocidades tan altas, las gotas se aplastan y se desagregan en muchas gotas pequeñas, manifestándose la precipitación como llovizna. 6 mm es un límite superior para el tamaño de las gotas que pueden caer por gravedad.

| Clase de gota          | Diámetro en (mm) | Velocidad de caída (m/s) |
|------------------------|------------------|--------------------------|
| Gota de lluvia grande  | 5                | 9                        |
| Gota de lluvia pequeña | 1                | 4                        |
| Lluvia fina            | 0.5              | 2.5                      |
| Llovizna               | 0.2              | 1.5                      |
| Gotita de nube grande  | 0.1              | 0.3                      |
| Gotita de nube común   | 0.05             | 0.08                     |
| Núcleos de gotitas     | 0.01             | 0.003                    |
| Incipientes            | 0.002            | 0.0001                   |

**Cuadro N°.2.1: Velocidad de gotas de lluvia según su diámetro(tomado de Inzunza, 1980)**

Las nubes están formadas por billones de gotas y su crecimiento por condensación es poco eficiente. Una gota de lluvia suficientemente grande para llegar a tierra sin evaporarse debe contener aproximadamente un millón de gotas de nubes. Por lo tanto, para que se forme la precipitación, deben juntarse millones de gotitas de nubes en gotas suficientemente grandes para formar gotas de lluvia, que logren persistir durante su descenso. Para esto se han propuesto dos procesos de formación de precipitación llamados: proceso de cristales de hielo y proceso de captura.

### **Proceso de Bergeron o de los cristales de hielo.**

Bergeron (1891 – 1971), meteorólogo sueco, propuso este método en 1928, que se basa en dos propiedades del agua en las nubes:

- a) Las gotas de agua en las nubes no se congelan a  $0^{\circ}\text{C}$ , sino que aproximadamente a  $-20^{\circ}\text{C}$ . El agua en estado líquido bajo  $0^{\circ}\text{C}$  se llama sobre enfriada y se congela rápidamente con cualquier agitación. Las gotas sobre enfriadas se congelan en contacto con partículas sólidas con estructura cristalina similar al hielo (por ejemplo yoduro de plata), llamados núcleos de congelación, necesarios para comenzar el proceso de congelación, similar a la condensación en los núcleos de condensación. Los núcleos de congelación son escasos en la atmósfera. Las nubes con temperaturas entre  $0$  y  $-10^{\circ}\text{C}$  están formadas por agua sobre enfriada, entre  $-10^{\circ}$  a  $-20^{\circ}\text{C}$  por agua y cristales de hielo, y menores a  $-20^{\circ}\text{C}$  por cristales de hielo, como los cirrus.
- b) La presión de vapor de saturación sobre los cristales de hielo es mucho menor que sobre el agua sobre enfriada. Por lo tanto, las moléculas de agua escapan fácilmente de una gota de nube sobre enfriada por encontrarse sometida a mayor presión

### **Proceso de captura o de coalescencia**

En las nubes se pueden formar grandes gotas cuando se dispone de núcleos de condensación gigantes, mayores a 20 micrómetros, o de núcleos higroscópicos que pueden crecer rápidamente. Estas gotas de nubes grandes caen a mayor velocidad que las pequeñas (Figura 2.2). Por ejemplo si una gota tiene un diámetro entre 2 y 5 milímetros, su velocidad de caída fluctúa entre 20-35 km/hr. A medida que esta gota cae, choca con las gotas de nubes de menor tamaño y se unen, la gota crece aumentando su velocidad de caída (si las corrientes de aire son muy fuertes puede ascender lentamente) y crece el número de choques



con las gotitas de nubes y sigue creciendo. Cuando la gota ha capturado un número aproximado de 1 millón de gotas, cae a la superficie sin evaporarse.

Si una gota crece hasta 5 o 6 mm de diámetro, cae a razón de 10 m/s, su tensión superficial no la puede mantener en ese estado y se rompe, dividiéndose en muchas otras gotas pequeñas que repiten un proceso similar, produciéndose la lluvia. Pero los choques de las gotas no garantizan su unión (o coalescencia), porque la corriente de aire que forma la gota en su caída puede alejar las gotitas, o porque las gotas pueden tener carga eléctrica de igual signo y se repelen; en este caso la electricidad de la atmósfera puede ser importante en generar gotas grandes y precipitaciones. Este es el proceso más común en la formación de las lluvias convectivas, comunes en zonas tropicales.

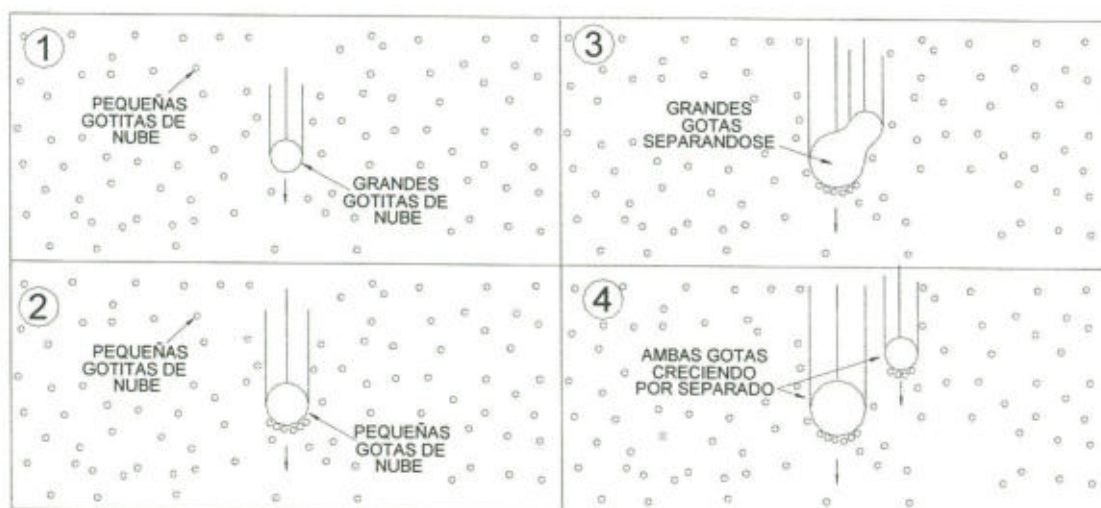

**Fig.Nº.2.2:** Esquema del proceso de coalescencia (Adaptado de Inzunza, 1980)



## 2.2 LAS NUBES

Las nubes son formas de humedad atmosférica, compuestas de pequeñas gotas de agua o de diminutos cristales de hielo, que se encuentran en suspensión en la atmósfera; pueden también contener impurezas. Una nube es un hidrometeoro, entendiendo que un meteoro es un fenómeno observado en la atmósfera, consistente en una suspensión o depósito de partículas líquidas o sólidas o una manifestación de naturaleza óptica o eléctrica<sup>18</sup>. Entonces un hidrometeoro es un meteoro consistente en un conjunto de partículas de agua líquida o sólida, suspendidas en la atmósfera como nubes o niebla, o que se precipitan.

Las nubes se clasifican sobre la base de dos criterios: según la forma que presentan y según la altura donde se ubican.

- Según su forma se reconocen tres clases básicas de nubes.
  - a) Cirrus: nubes altas, blancas y delgadas.
  - b) Cumulus: masa de nube globular, de base plana y que se eleva como domos o torre.
  - c) Stratus: Aparecen en capas cubriendo gran parte del cielo.
- Según su altura, se reconocen tres niveles típicos, que pueden variar según la época del año y la latitud (Cuadro 2.2).

| Región   | Nivel                                |                               |                                |
|----------|--------------------------------------|-------------------------------|--------------------------------|
|          | Inferior,<br>nubes bajas, $C_L$      | Medio;<br>nubes medias, $C_M$ | Superior<br>nubes altas, $C_H$ |
| Tropical | De la superficie de la tierra a 2 Km | 2 a 8 km                      | 8 a 18 km                      |
| Templada | De la superficie de la tierra a 2 Km | 2 a 8 km                      | 6 a 12 km                      |
| Polar    | De la superficie de la tierra a 2 Km | 2 a 8 km                      | 4 a 8 km                       |

**Cuadro N°.2.2:** Ubicación de las nubes en diferentes niveles (Tomado de Izunza, 1980).

Desde el punto de vista de la física del aire es interesante la explicación de la aparición de un determinado tipo de nubosidad en ciertos momentos. Este hecho no responde a la casualidad, sino que es consecuencia directa de un estado concreto del estrato de la atmósfera, en el cual se ha originado. Algunas nubes tienen un significado inequívoco, mientras que en otras su actividad esta ligada a complejas consideraciones de la situación meteorológica general. La aparición de stratus puede indicar una atmósfera estable, mientras que los cúmulus (densos de desarrollo vertical), presagian normalmente, un aumento de la inestabilidad atmosférica. En cambio los stratocúmulus están relacionados con tiempos calmos. Los nimbustratus, capa amorfa y oscura de gran espesor, están asociados a lluvias intensas, y en ciertas situaciones, a vientos fuertes.

### **Las Cumulonimbus**

Son nubes densas y potentes, de considerable desarrollo vertical, en forma de montaña o torres enormes. Por lo menos una porción de su parte superior suele ser lisa, fibrosa o estriada, y casi siempre achatada; esta parte muchas veces se extiende en forma de un yunque o de un gran penacho en la dirección del viento. Debajo de la base de la nube, que frecuentemente es muy oscura, muchas veces hay nubes bajas rasgadas, soldadas o no con aquéllas, también se presentan precipitaciones, las que se producen en forma de chaparrón.

Las cumulonimbus se subdividen, según sus características y grado de desarrollo, en las siguientes especies:

**Cumulonimbus calvus:** en las que las protuberancias de su parte superior han comenzado a perder sus contornos cumuliformes típicos, se aplastan y luego se transforman en una masa blanquecina, brillante, con contornos mas o menos difusos y estrías verticales. No presentan nubes cirriformes, pero a menudo se forman cristales de hielo con gran rapidez. Muy frecuentemente estas nubes son acompañadas por chaparrones que producen relámpagos, truenos y también granizo, aunque su cima no muestre indicios de formación de hielo.<sup>18</sup>



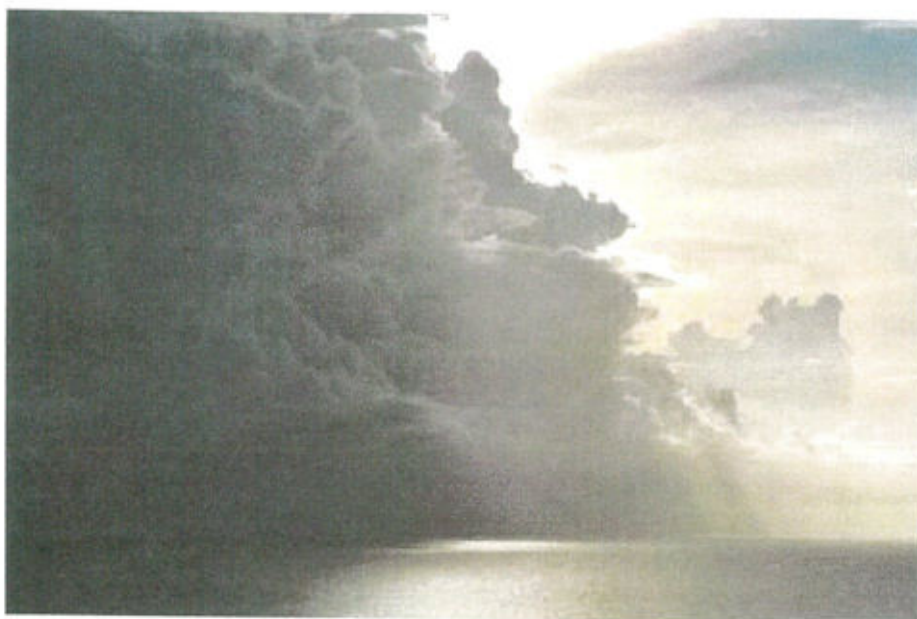

**Foto N°. 2.1:** Cumulonimbus calvus (Tomado de Izunza, 1980).

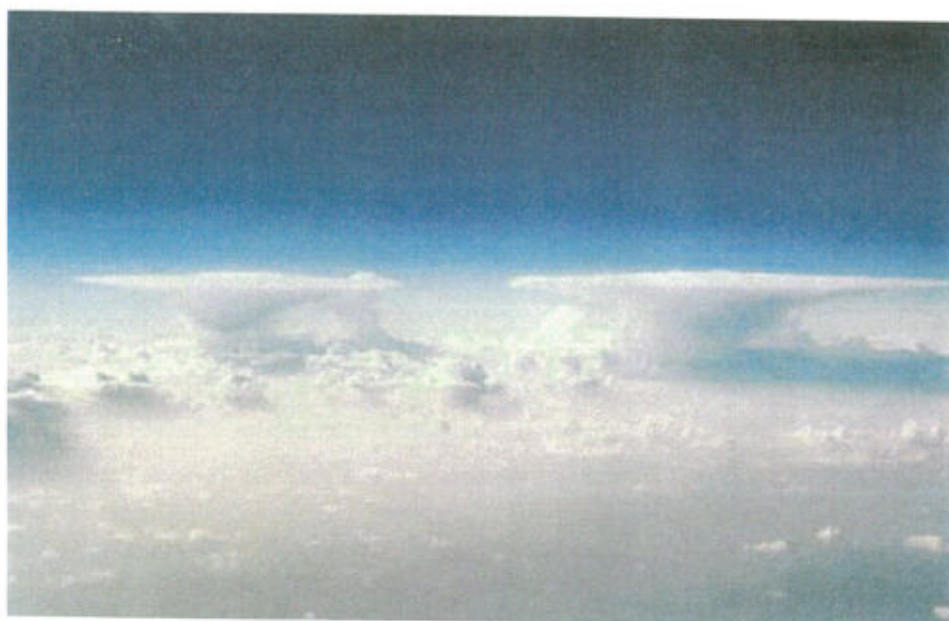

**Foto N°. 2.2:** Cumulonimbus capillatus (Tomado de Izunza, 1980).

**Cumulonimbus capillatus:** Son una especie de nube cumulonimbus, caracterizada por la presencia, principalmente en su porción superior con el aspecto de un yunque (incus), un penacho o una masa más o menos



desordenada de "cabellos". Esta nube es normalmente acompañada por chaparrones, tormentas eléctricas, y a menudo por turbonadas y por granizo o pedrisco.

Las características morfológicas sobresalientes de las cumulonimbus pueden resumirse así: están constituidas por gotitas de agua en su parte inferior y por cristales de hielo en su tope o cima; también contienen copos de nieve, nieve granulada, granizo y pedrisco de gran tamaño.

Sus dimensiones son considerables: la base se encuentra usualmente por debajo de los dos kilómetros, y su extensión vertical (entre la base y la cima) fluctúa entre 3 y 15 kilómetros. La agitación en el interior de estas nubes es muy fuerte, pues la atraviesan corrientes ascendentes de gran violencia y en su superficie exterior se produce el fenómeno contrario; es decir, el aire desciende a gran velocidad y arrastra los cristales de hielos que se van engrosando al cubrirse de sucesivas capas de agua congelada, convirtiéndose así en notables trozos de hielo que son lanzados otra vez hacia arriba, hasta que finalmente su peso los hace caer hacia el suelo, al que llegan algo disminuidos en su masa y su tamaño ya que se funden parcialmente durante la caída.

En la Figura 2.3 se muestra un esquema del desarrollo de una tormenta en una nube cumulonimbus.

Las cadenas montañosas que atraviesan el continente y a su vez el Ecuador, se encuentran en forma perpendicular a las direcciones de vientos predominantes en la región, éstas actúan como una barrera ante los vientos provenientes de occidente y oriente.

En la formación de nubes de tormenta en las gargantas y hoyas de la región interandina, intervienen dos fenómenos de diferente naturaleza pero de igual efecto. El primero, consiste en el estancamiento de humedad proveniente del

occidente debido al desplazamiento que sufre la Corriente de Humboldt, por la Corriente cálida de El Niño.

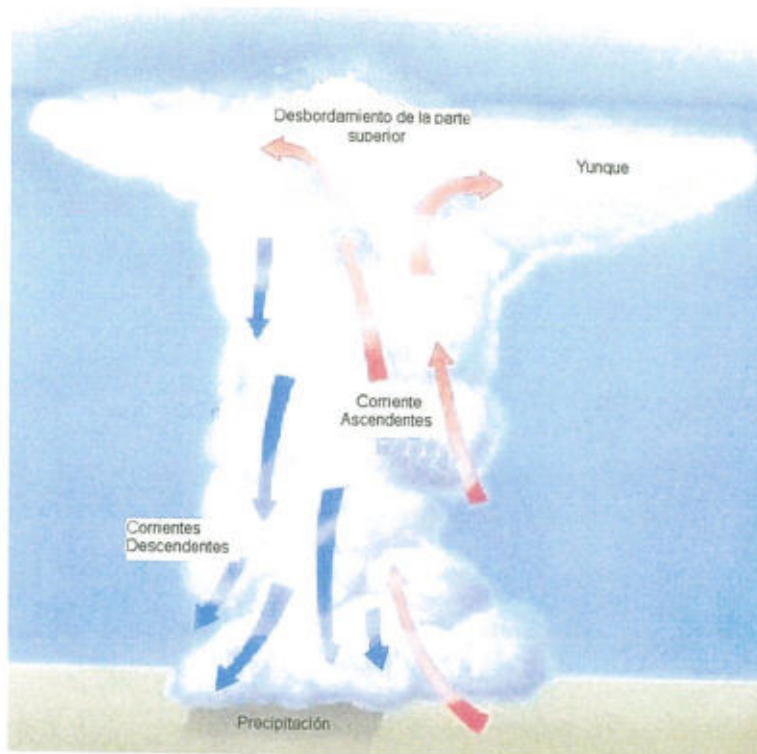

**Fig.Nº.2.3:** Esquema del desarrollo de una cumulonimbus (tomado de Inzunza, 1980)

El segundo y no por ello menos importante, consiste en el estancamiento debido al aporte de humedad proveniente de la fuerte expansión adiabática de la región oriental del país, esta expansión produce nubes cumulonimbus que llegan a alturas superiores a los 10000 metros, con lo que fácilmente atraviesan la Cordillera Occidental. Estos dos fenómenos juntamente con las características topográficas de las múltiples hoyas interandinas, han dado origen a la formación de microclimas de características muy especiales<sup>6</sup>.



## **EL VIENTO Y LA CIRCULACIÓN ATMOSFERICA**

El viento es el aire en movimiento producido por el desigual calentamiento de la superficie de la tierra. La variación de las presiones en un plano horizontal es la causa principal de la generación de los vientos.

La distribución espacial y temporal de los vientos ejerce gran influencia en los fenómenos climatológicos. El viento, al transportar energía y vapor de agua, actúa directamente en la intensidad y duración de la precipitación ocasionada por una tormenta, ya que abastece de humedad a la zona.

Es importante señalar la diferencia entre los vientos registrados por las veletas en las estaciones meteorológicas y los vientos de altitud que mueven los meteoros durante las tormentas. Los primeros, a nivel de la superficie registran direcciones aleatorias durante una tormenta debido a los denominados vientos de arrachada, esto se produce por el llenado de los vientos fríos a las zonas bajas cercanas a la superficie de la tierra, como consecuencia del espacio dejado por el ascenso de las masas de aire debido a su calentamiento.

### **2.3 TEORIA COLUMNAR DE LAS TORMENTAS**

De la investigación de tormentas, realizada entre 1945 y 1950 "Proyecto de tormentas"<sup>5</sup>, se llegó a la conclusión de que las tormentas están formadas por una o varias células, cada una de las cuales tiene un definido tiempo de vida. Durante la primera parte del desarrollo de la célula, el movimiento del aire es casi enteramente ascendente y en gran proporción, el aire que forma la nube proviene de las capas situadas por debajo de la base de ella. En menor proporción se producen aportes laterales.

Mientras dura la fase inicial, conocida como la etapa cumuliforme, las nubes crecen rápidamente y las velocidades ascendentes aumentan. El crecimiento de la nube se refleja en el incremento de las precipitaciones. Cuando estos



elementos son suficientemente grandes, su peso se hace significativo, y ejercen suficiente resistencia al ascenso como para obligar a una parte del aire de la nube a iniciar el descenso. Este se considera el comienzo de la llamada etapa de madurez.

Una vez que la corriente descendente se ha generado, se acelera rápidamente, y al enfriarse el aire por la evaporación de la precipitación, adquiere mayor densidad y peso que el aire exterior de la nube.

Durante el estado de madurez, los movimientos verticales, tanto ascendentes como descendentes, son más severos. Una parte de la nube se eleva con velocidad máxima mientras que, al mismo tiempo, otra parte de ella, cada vez mayor, está descendiendo con intensidad creciente.

En la etapa de madurez, una tormenta se caracteriza por su máxima precipitación, efectos eléctricos y ráfagas en la superficie del suelo.

A medida que la corriente descendente crece al interior de la nube, disminuye gradualmente la energía proporcionada por la corriente ascendente. Cuando toda la nube está constituida por aire descendente, la tormenta alcanza su etapa final de disipación<sup>5</sup>.

En este momento, tanto la intensidad de la turbulencia, como la precipitación y la actividad eléctrica han disminuido; todo lo que resta es una gran masa vellosa de nubes que comienza a evaporarse con rapidez.

Se supone que una célula tiene un diámetro de unos pocos kilómetros y dura algo menos de una hora. Sin embargo, una tormenta intensa puede estar constituida por muchas células, cada una de ellas en diferente estado de desarrollo. Cuando una célula se disipa otra nueva se desarrolla, y de esta manera una tormenta puede durar muchas horas<sup>5</sup>.

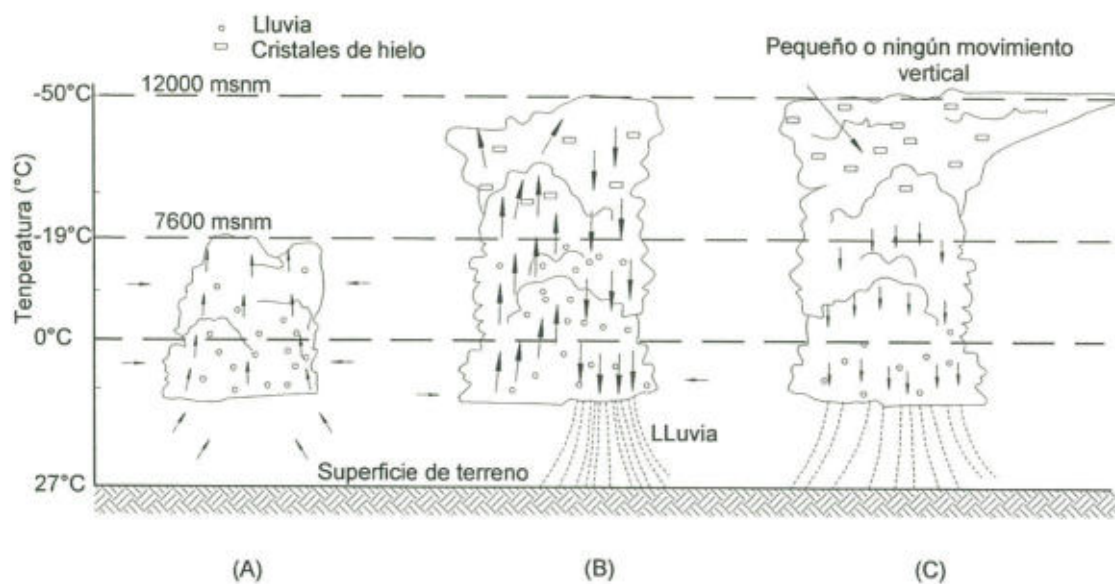

**Fig. N°. 2.4:** Etapas de una célula De tormenta(Tomado de Viessman, et al, 1977)

## CAPITULO 3

### TORMENTAS EN QUITO

#### 3.1 DIRECCIONES PRINCIPALES DE TORMENTAS EN QUITO

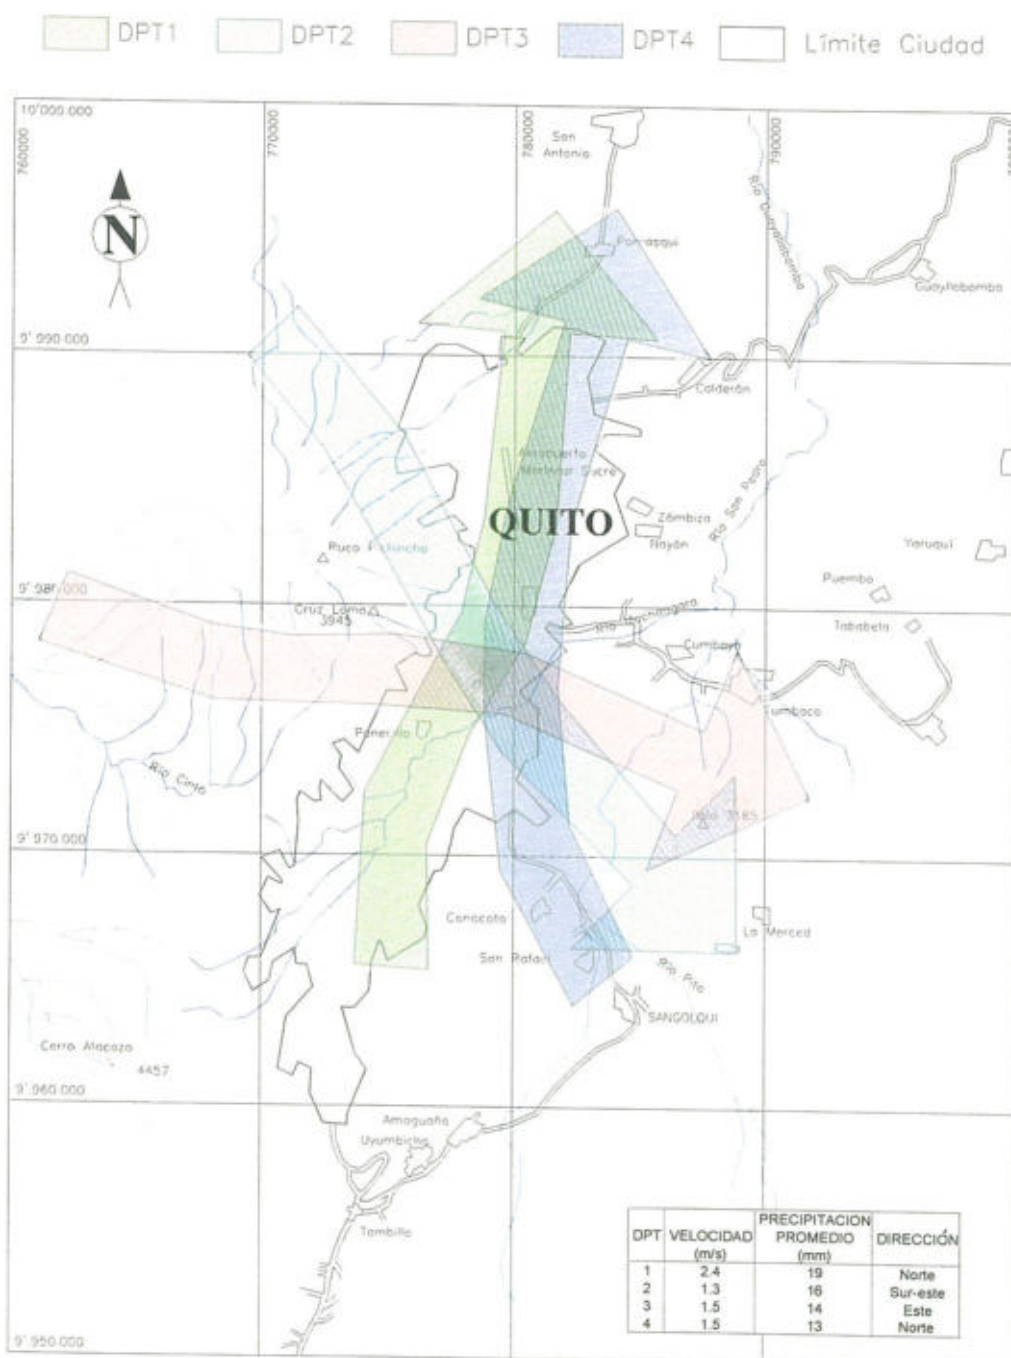

**Fig.Nº.3.1:** Direcciones Principales de Tormentas en Quito (DPT)  
(Adaptado de Beltrán, 1995).



Para la ciudad de Quito, en base al análisis de 32 tormentas observadas en estaciones climatológicas localizadas en Quito y sus alrededores (Beltrán,1995), se dedujo 4 direcciones principales de desplazamiento de las masas de humedad asociadas a las lluvias intensas. Estas direcciones se nominaron direcciones principales de tormenta - DPT y se indican en la Figura 3.1.

La circulación atmosférica, la presencia de las cadenas montañosas ecuatorianas, junto con la localización y topografía de la hoya de Quito inciden en los procesos de formación de las lluvias intensas y en el desplazamiento de las masas de humedad. De acuerdo al origen y al área de cobertura, las lluvias intensas se dividen en: tormentas de tipo local y tormentas de tipo regional. Esta clasificación también esta relacionada con la duración de los eventos de lluvia.

Las tormentas con influencia predominantemente regional, relacionadas con vientos cargados de humedad provenientes de la región litoral y amazónica, generan lluvias de duraciones medias a altas (510 a 1920 min)<sup>6</sup>. La gran cantidad de disponibilidad de humedad en las masas de aire, posibilita la superposición de células de lluvia, en tiempo y espacio, produciendo una tormenta de varias horas de duración.

En las tormentas de origen local, posiblemente, las masas de humedad están disponibles en los valles y cuencos de las hoyas existentes en las inmediaciones, y por procesos convectivos y orográficos han sido elevadas hacia los estratos altos de la atmósfera. Estas tormentas generalmente de corta duración se caracterizan por las intensidades significativas.

### **3.2 PATRONES TEMPORALES DE LLUVIA EN QUITO**

Beltrán(1995) propone un análisis estadístico sobre las distribuciones temporales de eventos de lluvia para la ciudad de Quito. En el cuadro 3.1 se presenta en términos comparativos los patrones temporales obtenidos por Huff (1967) para

pequeñas cuencas en el medio-oeste de los Estados Unidos y aquellos obtenidos para la ciudad de Quito<sup>6</sup>.

| Probabilidad<br>Según Huff<br>Primer Cuartil | DURACIONES ( 34 - 1920 min)         |                               |                                  |
|----------------------------------------------|-------------------------------------|-------------------------------|----------------------------------|
|                                              | N° de tormentas<br>con igual patrón | N° de tormentas<br>Acumuladas | Probabilidad de<br>excedencia(%) |
| 10                                           | 32                                  | 32                            | 19                               |
| 20                                           | 13                                  | 45                            | 26                               |
| 30                                           | 17                                  | 62                            | 36                               |
| 40                                           | 16                                  | 78                            | 45                               |
| 50                                           | 24                                  | 102                           | 59                               |
| 60                                           | 15                                  | 117                           | 68                               |
| 70                                           | 18                                  | 135                           | 78                               |
| 80                                           | 18                                  | 153                           | 89                               |
| 90                                           | 19                                  | 172                           | 100                              |

**Cuadro N°.3.1:** Comparación de la probabilidad de excedencia (Beltrán, 1995).

En la Figura adjunta 3.2 se presenta de forma gráfica los resultados de este análisis.

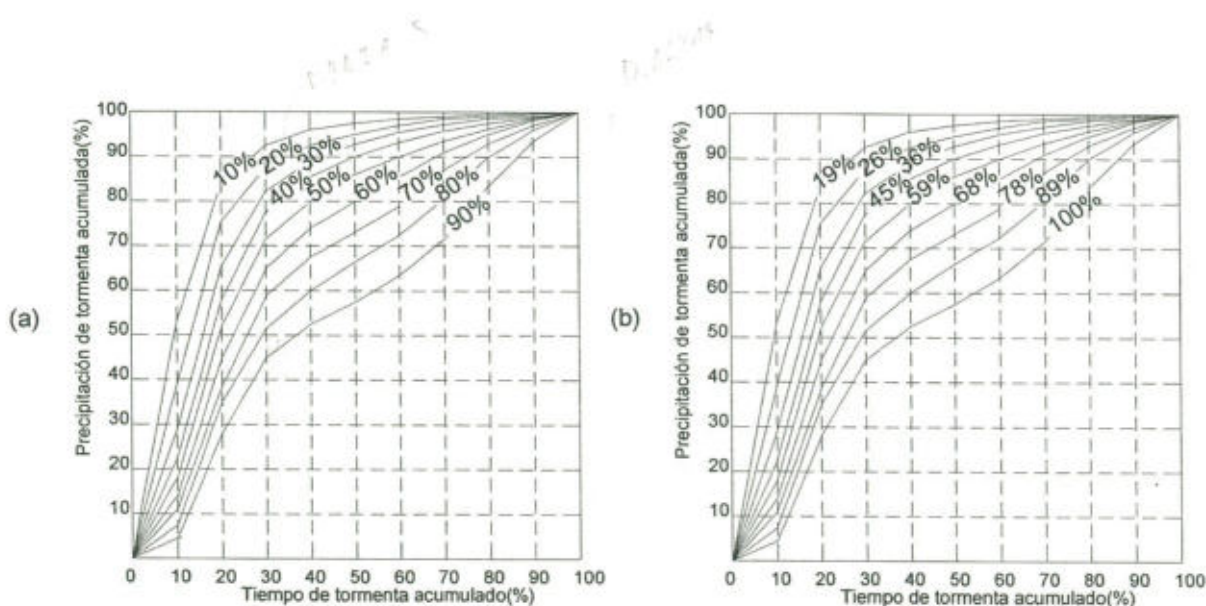

**Fig.N°. 3.2:** Comparación entre patrones temporales de tormenta de primer cuartil (a) Para Estados Unidos (1967) (b) Para Quito (1995) (Adaptado de Beltrán, 1995).

### 3.3 DURACION DE TORMENTAS EN QUITO

El rango de duraciones de tormentas, obtenido para Quito, varía entre 35 min hasta 1920 min<sup>6</sup>. En esto, el rango de duraciones menores se establece entre 35 y 499 minutos y corresponde al 49% del total de eventos de tormenta. Las duraciones medias se encuentran en 510 y 760 minutos y son el 22% de los eventos registrados, mientras que las duraciones altas están entre 780 a 1920 minutos, con el 29% de frecuencia (Beltrán, 1995)

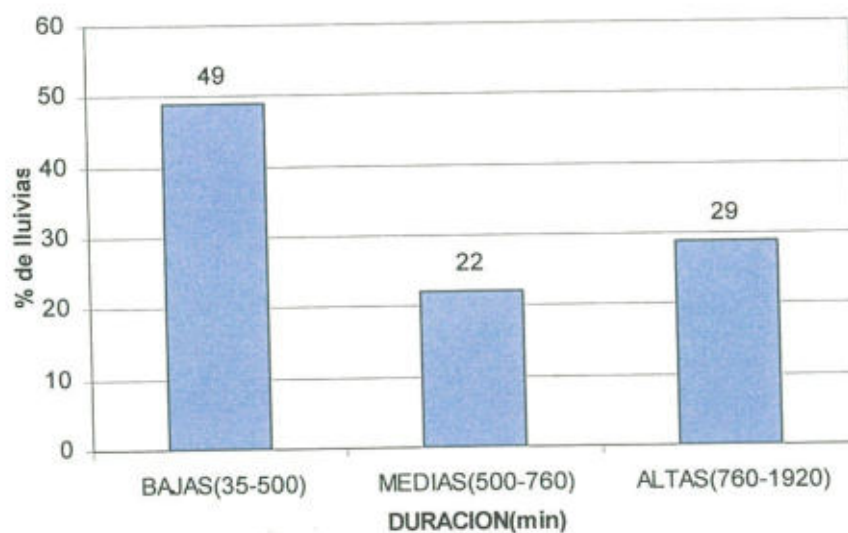

**Fig.N°.3.3:** Distribución de tormentas en Quito según su duración (Beltrán, 1995).



## CAPITULO 4

### MODELO DE LLUVIA PROPUESTO

#### 4.1 INTRODUCCIÓN

Como se anotó anteriormente, la observación y análisis de tormentas observadas en la ciudad de Quito y sus alrededores permitieron entender ciertos procesos de formación y ocurrencia de las lluvias intensas, y abrieron la posibilidad de sustentar el desarrollo del modelo que se describe a continuación.

**“Modelación matemática de tormentas unicelulares”.**

Presentado dentro del VII Congreso Nacional de Hidráulica, en noviembre de 1997.

En primer lugar la distribución de la lluvia al interior del área bañada en un evento dado puede ser representada mediante un patrón espacio-temporal, que se describe con ayuda de ecuaciones, que relacionan la duración de la tormenta con varios parámetros y variables asociados.

El modelo desarrollado es de tipo **empírico** ya que parte del entendimiento del proceso de formación de una nube de tormenta, que se describe en el Capítulo II, y se complementa con el análisis de varios eventos de lluvia, registrados en Quito. En modelo es asimismo **matemático**, porque su comportamiento se expresa a través de ecuaciones que relacionan variables y parámetros.

Para ilustrar el desarrollo se destaca un ejemplo, tomado del trabajo de Beltrán (1995). En la página 79; referente al análisis de pluviogramas simultáneos en Quito, Figura 4.1, se precisa: “El claro e interesante proceso acelerado que se observa entre la estación Quito Observatorio y la estación Iñaquito indican una homogenización del fenómeno sobre toda el área de cobertura de tormenta; se

podría hablar de una onda de expansión acelerada tendiente a homogeneizar el fenómeno. Se debe notar que el punto coincidente F, indicaría que la onda llega a un máximo de expansión y posteriormente retrocede produciéndose una onda negativa o con efecto inverso que ahora a su paso causa el fin de tormenta. Situación similar se ha observado en 23 de las 38 tormentas analizadas".

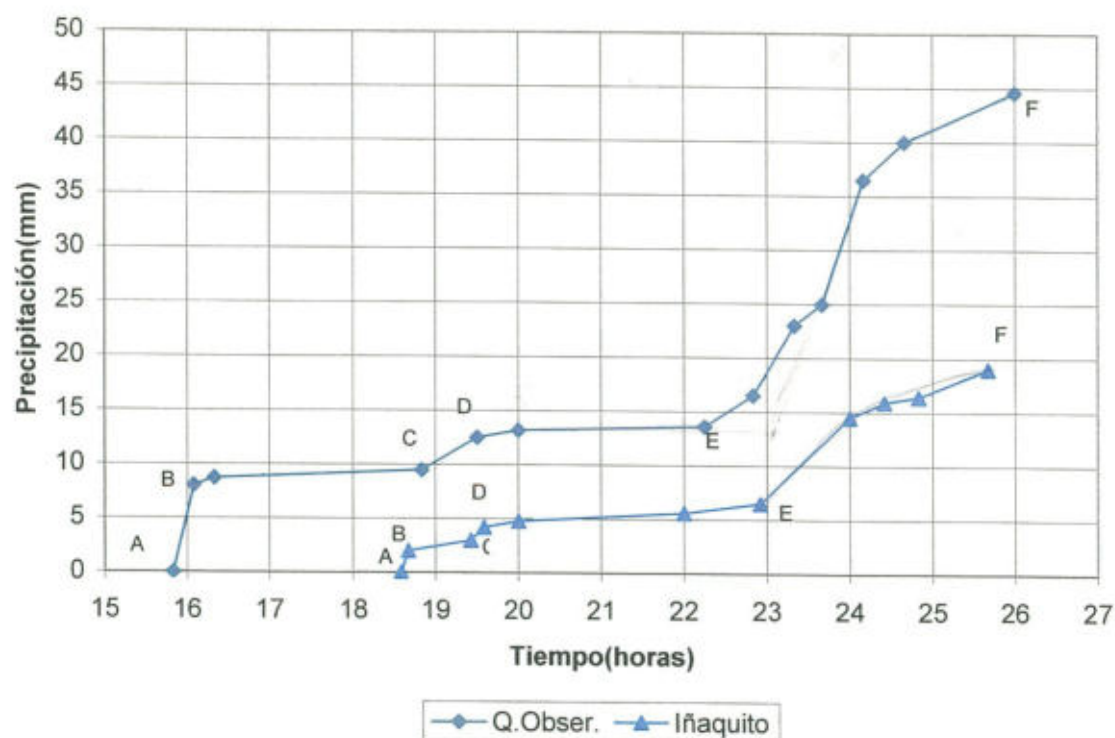

**Fig.Nº.4.1: Pluviogramas simultáneos observados el 22-05-1987, en la ciudad de Quito, tomado de Beltrán (1995)**

Si bien el análisis propuesto a continuación tiene cierto grado de subjetividad, se destaca lo siguiente:

- Las dos estaciones miden el mismo fenómeno natural (un mismo evento de lluvia), caracterizado por presentar puntos cualitativamente coincidentes claramente identificados (A,...,F)
- En su recorrido se observan tres sub-fenómenos distribuidos en el tiempo, el primero de A a C, el segundo de C a E y el tercero de E a F.
- Los puntos coincidentes se presentan primero en la estación Quito-Observatorio y después en la estación Iñaquito (a excepción del punto F y



en cierta forma el punto E; pues se podría interpretar que el punto E empezó a las 22 horas).

- El punto coincidente A indica una dirección de movimiento de tormenta de la estación Quito Observatorio hacia la estación Iñaquito.
- La disminución del tiempo entre cada par de puntos correspondientes refleja la rápida propagación del fenómeno lluvia.
- El punto F establece el fin de la lluvia, de forma inversa, termina primeramente en la estación Iñaquito y luego en la estación Quito-Observatorio.

Si se piensa en un tipo de avance en una dirección del frente de lluvia, entonces aparentemente las conclusiones de lo observado son contradictorias. Al respecto caben las siguientes preguntas: ¿porqué el frente de avance de la lluvia tiene dirección opuesta al frente de fin de lluvia?; ¿no se esperaría acaso que el avance del frente tenga una sola dirección?; ¿Un modelo radial no sería más apto para justificar lo observado?; ¿Al fenómeno observado se podría clasificar como un conjunto de eventos o células de tormentas independientes?.

¿Se podría sustentar un frente de onda circular de lluvia que llega a un máximo desarrollo y luego retrocede?.

Estos razonamientos permitieron generar las suficientes inquietudes para orientar una investigación tendiente a generar un modelo de lluvias que satisfaga las observaciones realizadas.

En este Capítulo se destaca la importancia de la velocidad del viento predominante en la zona como de su magnitud. Por ello la necesidad de incorporar en el modelo computacional generado a la variable viento. Por viento de altura se entiende la variable que describe, de alguna manera, la circulación del aire en sentido horizontal, y que tiene dependencia con las corrientes marinas, la presencia de las cadenas montañosas y la morfología de los valles.



Se indica de antemano que las tormentas formadas por varias células sobrepuestas en tiempo y/o espacio (multicelulares) han sido excluidas dentro del presente modelo, por su complejidad. Se debe primeramente validar el procedimiento y justificarlo en base al estudio de la unidad elemental del fenómeno "la nube de tormenta" o "célula de tormenta".

## 4.2 DESCRIPCION DEL MODELO

Se conoce que en una nube de tormenta, los procesos de precipitación se encuentran acompañados de corrientes descendentes. Estas corrientes al chocar en la superficie generan los denominados vientos de arrachada<sup>4</sup> o ráfagas en la superficie. El continuo aumento de las corrientes descendentes y de las partículas de precipitación se refleja también en el avance del área de afectación. Es así que al final de la etapa de disipación de una nube de tormenta, las corrientes prácticamente en su totalidad son descendentes, abarcando así las grandes áreas de cobertura de este tipo de nubes (Figura 2.5 y Figura 2.6).

A continuación se analiza la distribución espacio-temporal de una nube de tormenta, Figura 4.2. En ella se observa un modelo de célula en la que la precipitación se manifiesta inicialmente en un punto y avanza paulatinamente cubriendo más y más área.

Al inicio de la precipitación, gotas de lluvias acompañadas de corrientes descendentes, se precipitan de forma intensa en una área pequeña (Radio igual a  $R_1$ ); Figura 4.2.a. Mientras avanza el tiempo, la zona con presencia de lluvia se va incrementando; Figura.4.2.b, a un radio  $R_2$ . En la etapa de la Figura 4.2.c, la célula del modelo alcanza un radio máximo  $R_3$ .

Debe notarse que este esquema cumple dos condiciones:

- No se consideran vientos regionales (horizontales).

- Se pueden dar otros escenarios de ocurrencia de lluvias intensas. Por ejemplo, si la lluvia inicia en cualquier otro lugar que no sea el centro, por ejemplo los lados, Figura 4.3

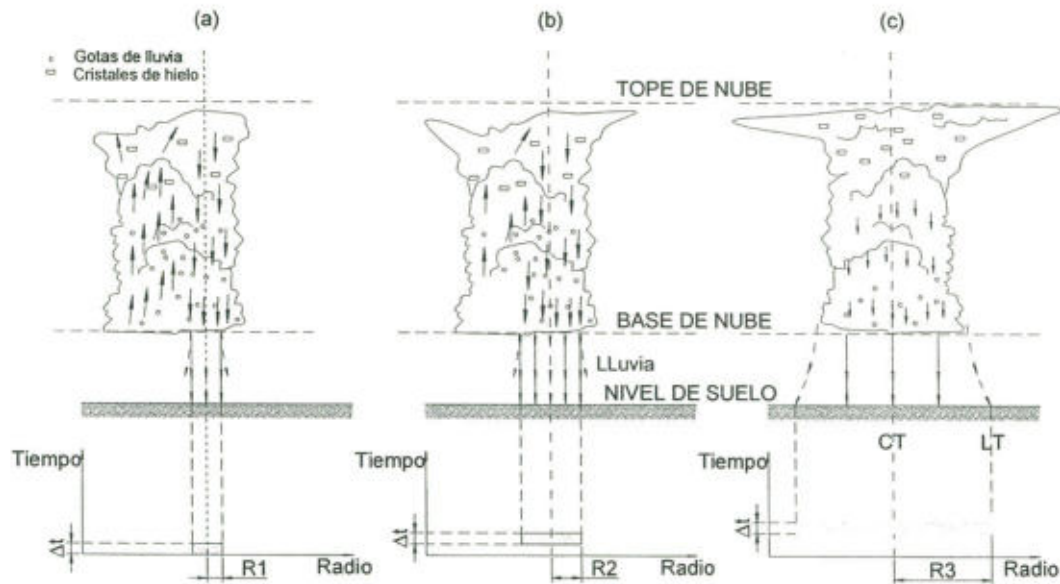

**Fig.N°.4.2:** Escenario de presentación de lluvia (Adaptado de Figura 2.4).

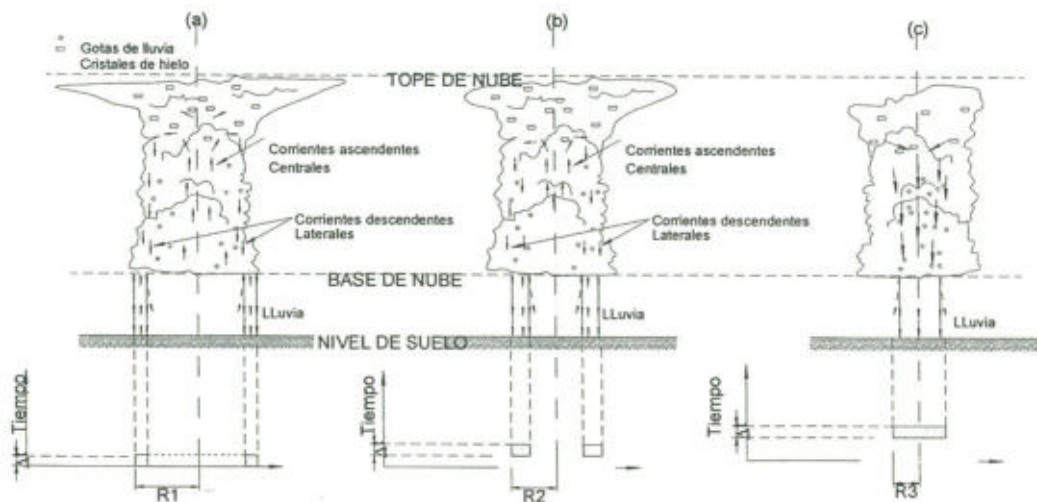

**Fig.N°.4.3:** Posible variación en escenario de presentación de lluvia (Adaptado de la Figura 4.2).

Por sobre los distintos escenarios que se puedan presentar dentro de una nube de tormenta, sin importar su ubicación relativa a la nube, existe un punto o zona, en donde la lámina de precipitación es máxima y otra, en donde la precipitación es nula (en el perímetro exterior).

Para la conceptualización del modelo se asumen las siguientes hipótesis básicas:

1. Toda tormenta unicelular tiene un centro de tormenta *CT*. El centro de tormenta se lo define como aquel punto que tiene una duración de lluvia (*DT*) máxima y una lámina de lluvia (*PRE*), de igual forma máxima.
2. El modelo de tormenta unicelular tiene un límite *LT*, en donde la lámina de precipitación es nula y se encuentra a un radio  $R = R \text{ máximo}$  en todas las direcciones desde el centro de tormenta *CT*.
3. El modelo de tormenta unicelular considera una similitud radial del fenómeno en toda dirección desde su centro.

En cuanto a la distribución temporal de lluvia, Figura 3.2., se utiliza la siguiente hipótesis:

4. La forma adimensional de la distribución temporal de lluvia, mantendrá su forma en toda el área bañada por la célula de tormenta.

Esta hipótesis por lo tanto asume que, si una tormenta comienza con gran intensidad para posteriormente disminuir poco a poco hasta llegar a su fin, con igual patrón se presentará la lluvia en todos y cada uno de los puntos de cobertura de tormenta, independiente de la lluvia acumulada y su duración.



### 4.2.1 ECUACIONAMIENTO DEL MODELO

El modelo propuesto requiere una formulación matemática que lo exprese, respetando las hipótesis propuestas. Dicha formulación puede ser expresada de forma continua o discreta y en intervalos de tiempo igualmente espaciados, que facilitan su descripción mediante un algoritmo y la programación que facilite el cálculo numérico.

#### a) Variación espacial de la duración de tormenta

Para evaluar la forma espacio-temporal de una tormenta es necesario derivar una relación que asocie la duración y la lámina de precipitación en puntos situados dentro del área de cobertura de dicha tormenta.

Una de las principales hipótesis del modelo se refiere a que la duración de la tormenta en su centro siempre es mayor que la duración en cualquier otro punto de cobertura.

En una tormenta unicelular, el límite de tormenta ( $LT$ ) se presenta a un radio  $R=R_{max}$ , igual en todas las direcciones desde el centro de tormenta. Entonces, al incremento del radio de acción de una tormenta corresponde una disminución de la duración total en el punto. Si el radio es igual a cero, la duración es máxima ( $DT$ ); y a radio máximo, la duración es igual a cero (Figura 4.4).

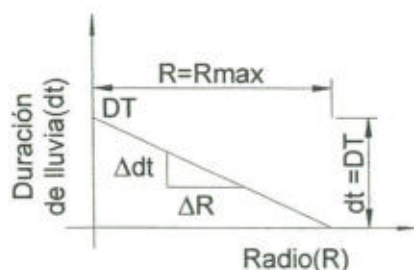

**Fig.Nº.4.4:** Representación de la duración de lluvia respecto al radio de cobertura de una tormenta unicelular

La duración de lluvia, para un radio  $R$  es proporcional al radio de tormenta, de la siguiente forma:

$$\Delta dt \propto \Delta R \quad (4.1)$$

Colocando una constante de proporcionalidad:

$$\Delta R = -K \Delta dt \quad (4.2)$$

Dimensionalmente:  $[L] = [L/T][T]$

En donde:

$K$  = constante definida como la velocidad media de movimiento de la tormenta desde su centro hasta la periferia.

Se destaca que el eje de las ordenadas no representa el tiempo continuo sino la duración de lluvia independiente de su formación en el tiempo.

De la ecuación (4.2);

$$R_2 - R_1 = -K \cdot (dt_2 - dt_1)$$

Si el punto 1 es el centro de tormenta y el punto 2 es cualquier punto interno a radio igual a  $R$  y duración  $dt$ , se tiene:

$$\text{Si ; } R_1 = 0 \text{ y } dt_1 = DT$$

$$R = K \cdot (DT - dt) \quad (4.3)$$

Despejando  $dt$ ,

$$dt = DT - \frac{R}{K} \quad (4.4)$$

Si:  $dt=0 \therefore R = R_{max}$  (Radio máximo)

$$R_{max} = K \cdot DT \quad (4.5)$$

Las ecuaciones (4.3), (4.4) y (4.5) han sido obtenidos al considerar una única constante de proporcionalidad que relaciona las variables de la ecuación (4.2). Esto ciertamente es una consideración válida cuando la duración de lluvia disminuye en forma lineal del centro de tormenta hacia la periferia. Como se indica a continuación, se pueden hacer otras consideraciones sobre el tema.

En la Figura 4.5.a se representa la duración de la lluvia como función del radio de cobertura de tormenta, En esta Figura, si existe incremento de la duración de la lluvia, el radio de cobertura o de acción de la tormenta disminuye. En un modelo continuo como el indicado en la Figura 4.5.b, la duración de la tormenta a cualquier radio puede ser expresada mediante una función que relaciona ambas variables.

Si se conoce la duración de lluvia en su centro  $DT$  y el radio en el límite de tormenta  $LT$ , como condiciones de borde, se puede identificar una infinidad de funciones que cumplan tales condiciones.

Una función de tipo exponencial, que representa una familia de curvas que cumplen con las condiciones de borde indicadas y que prácticamente abarca una multitud importante de funciones es (Figura 4.5.c):

$$dt = DT \cdot \left(1 - \frac{R}{R_{max}}\right)^m \quad (4.6)$$

En donde;  $DT$ , es la duración de la lluvia en el centro

$dt$ , la duración de la lluvia en cualquier punto ubicado a un radio  $R$  de su centro.

$m$ , exponente de curva.



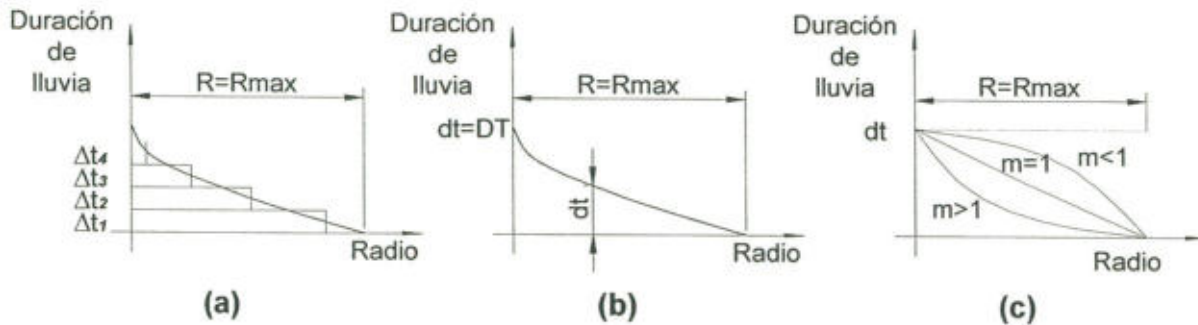

**Fig.Nº.4.5:** Cambios de la duración de lluvia con respecto al radio de cobertura de tormenta

(a) Modelo discreto de la duración de lluvia. (b) Modelo de duración de lluvia expresado por una función continua. (c) Funciones continuas de tipo exponencial entre la duración y el radio de cobertura de tormenta.

El valor del exponente  $m$  asume diferentes valores, en relación con la hipótesis 1. Cuando:

- $m < 1$ , la distribución de la duración de la lluvia en su cobertura tiene una forma cóncava hacia arriba, Figura 4.5.c
- $m = 1$ , la distribución es lineal, en este caso la ecuación 4.6 se convierte en la ecuación (4.4).
- $m > 1$ , la distribución de la duración de la lluvia es convexa.

En adelante se adopta el valor  $m = 1$ , debido a que la variación de los componentes que forman el modelo de tormenta son de hecho más significativos, según se demuestra posteriormente.

En varias tormentas analizadas se destaca que, aunque la precipitación en diferentes estaciones era menor que la registrada en el centro de tormenta, la duración sin embargo era mayor. Esta observación en el contexto del presente trabajo se asume que es resultado de la influencia de los vientos regionales.

#### **b) Variación espacial de la precipitación total en relación a su duración**

Como sustento de este análisis se analizan dos tormentas registradas en 6 estaciones climatológicas, la primera de corta duración y la otra de larga duración, muy similares en cuanto a sus láminas de precipitación acumulada en sus respectivos centros (30 mm aproximadamente). En el cuadro 4.1, se encuentran tabulados los datos indicados, y la Figura 4.4, resume de manera gráfica sus variaciones.

Se recuerda que eje de las abscisas de la Figura 4.6 no representa el tiempo continuo, sino solamente un intervalo de él, expresado en horas.

| Estación de Medición | Tormenta 1; Duración Baja |        |          | Tormenta 2; Duración Alta |        |          |
|----------------------|---------------------------|--------|----------|---------------------------|--------|----------|
|                      | Fecha: 1982/12/07         |        |          | Fecha: 1984/02/16         |        |          |
|                      | Int.(mm/h)                | Dur(h) | Prec(mm) | Int.(mm/h)                | Dur(h) | Prec(mm) |
| Q.Obser.             | 12.00                     | 2.50   | 30.00    | 2.11                      | 14.00  | 29.60    |
| Izobamba             | 4.39                      | 2.05   | 9.00     | 1.46                      | 9.33   | 13.60    |
| Iñaquito             | 12.22                     | 2.32   | 28.30    | (*)                       | (*)    | (*)      |
| Tola                 | 1.98                      | 1.42   | 2.80     | 0.91                      | 7.70   | 7.00     |
| Chorrera             | 3.55                      | 1.92   | 6.80     | 1.36                      | 6.82   | 9.30     |
| Aeropuerto           | 7.63                      | 2.33   | 17.80    | 1.11                      | 5.92   | 6.60     |

Nota(\*): Dato no disponible

#### **Cuadro N°.4.1: Registro de eventos de lluvia tipo(Beltrán, 1997)**

Como se observa en la Figura 4.6, cuando la duración tiene un valor máximo, la precipitación acumulada también adquiere un valor máximo, indicando por tanto el centro de tormenta *CT* definido en la hipótesis 1. Cuando la duración es nula la

precipitación también es nula, indicando por tanto el límite de tormenta  $LT$  de la hipótesis 2.

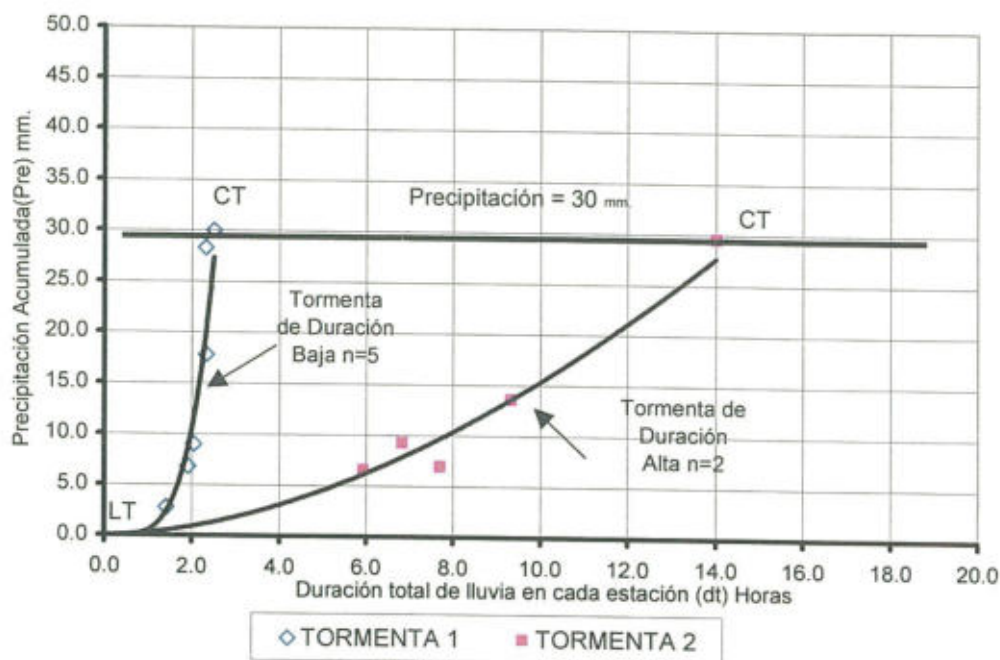

**Fig.Nº.4.6:** Precipitación vs duración de tormentas tipo

Adicionalmente, se destaca que la lámina de precipitación acumulada decrece con el aumento del radio, respecto al centro de tormenta, según una función de tipo:

$$pre = K_0 \cdot dt^n \quad (4.7)$$

En donde:  $pre$ , Precipitación en cualquier punto de cobertura de tormenta.

$dt$ , Duración de tormenta en cualquier punto de cobertura.

$K_0$  y  $n$ , Coeficiente y exponente de ajuste.

La ecuación (4.7) por tanto, cumple con la hipótesis 1 y 2, y es válida únicamente para un rango de valores entre:  $0 \leq dt \leq DT$ , donde  $DT$  representa la duración de la lluvia en el centro de tormenta.



Si se toma en cuenta que la duración  $dt$  de la ecuación (4.7) mantiene una relación funcional con el radio de tormenta mediante la ecuación (4.4), entonces se podría enlazar la duración y la precipitación acumulada en una sola ecuación.

La constante  $K_0$ , se la deduce mediante la condición de borde máxima, es decir, cuando la duración de tormenta registrada es igual a la duración en el centro de tormenta ( $dt = DT$ ). En este punto, la precipitación es igual a la precipitación máxima correspondiente al centro de la tormenta.

Si  $dt = DT$ , entonces  $pre = PRE$

y,

$$K_0 = \frac{PRE}{DT^n} \quad (4.8)$$

En la ecuación (4.8),  $PRE$  es la precipitación máxima y se presenta en un punto ubicado en el centro de tormenta  $CT$ . Este valor  $PRE$  no depende de ninguna otra variable dentro del modelo y se lo ingresará como condición de borde.

En tanto que  $pre$  es la precipitación en cualquier punto de cobertura de tormenta y depende de otras variables y parámetros.

Reemplazando la ecuación (4.8) en (4.7) se tiene:

$$pre = PRE \cdot \left( \frac{dt}{DT} \right)^n \quad (4.9)$$

Donde;  $pre$ , Es la precipitación total en un punto con duración de lluvia igual a  $dt$ .

$PRE$ , Es la precipitación total en el centro de tormenta que tiene una duración igual a  $DT$ .

La precipitación en cualquier punto de cobertura de tormenta  $pre$ , es función de la precipitación en el centro de tormenta  $PRE$ , de la duración en el centro de tormenta  $DT$ , de la duración en el punto de análisis  $dt$  y de un exponente  $n$  denominado parámetro de forma.

Si se reemplaza la ecuación (4.4) en (4.9), se obtiene:

$$pre = PRE \cdot \frac{(DT - \frac{R}{K})^n}{DT^n} \quad (4.10)$$

En cuanto a intensidades, la intensidad  $I$  en cualquier punto de cobertura de tormenta puede expresarse como:

$$I = \frac{pre}{dt} \quad (4.11)$$

y por tanto, reemplazando (4.4) y (4.10) en (4.11), se obtiene:

$$I = PRE \cdot \frac{(DT - \frac{R}{K})^{n-1}}{DT^n} \quad (4.12)$$

Donde;  $I$ , es la intensidad en cualquier punto con duración de lluvia igual a  $dt$ .

$PRE$ , es la precipitación total en el centro de tormenta que tiene una duración igual a  $DT$

Las ecuaciones (4.10) y (4.12) representan la precipitación total y la intensidad media en cualquier punto de cobertura de tormenta. Estas ecuaciones incluyen los siguientes elementos:

- Tienen una condición de borde definida por el valor de  $PRE$  y  $DT$
- Dos parámetros, el primero denominado velocidad media de movimiento  $K$  y el segundo exponente de forma  $n$ .
- Una variable dependiente denominada radio al centro de tormenta  $R$ .

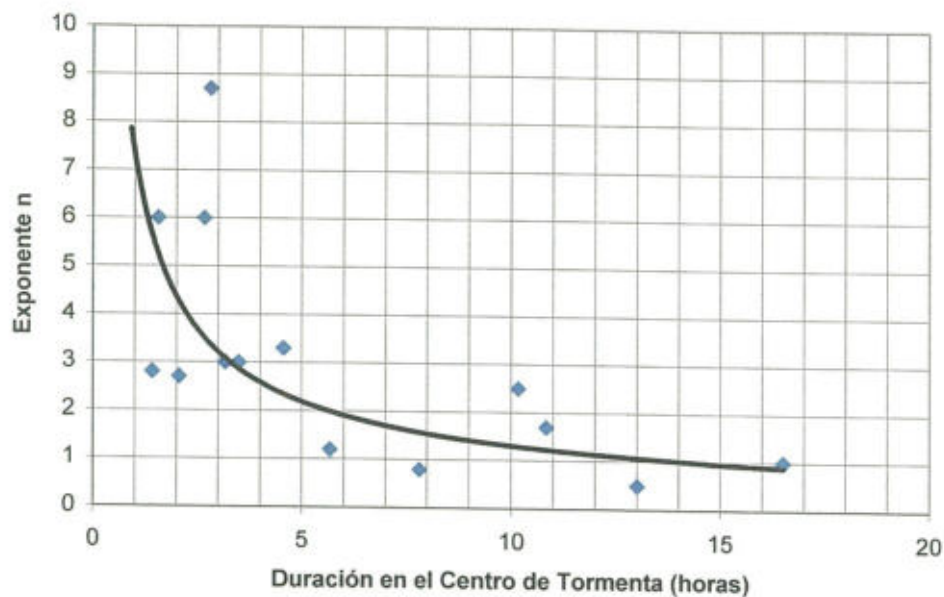

**Fig.Nº.4.7:** Gráfico preliminar de la variación del exponente  $n$  con relación a la duración de tormenta en su centro ( $DT$ ).

En tanto que el exponente  $n$  define la distribución de la cantidad de precipitación en un punto con duración  $dt$ .

Para obtener el valor de  $n$  se puede utilizar la Figura 4.7, en la cual se ha realizado un ajuste para 14 eventos de tormenta entre el valor de la variable  $n$  y la duración de lluvia en su centro utilizando la ecuación (4.9). Esta Figura se utiliza como ayuda para un primer ajuste entre el exponente  $n$  y la duración de tormenta en su centro.

En el numeral 4.3, que se refiere a la calibración del modelo, se llega a determinar una función que relaciona el exponente de forma  $n$  y la duración de la tormenta en su centro  $DT$ . Para esto se ha utilizado un procedimiento de ajuste con eventos de tormentas observadas, en el que interviene la velocidad de los vientos de altura.



El término *PRE* referente a la precipitación en el centro de tormenta se lo puede utilizar bajo dos significados, según el objetivo de la simulación:

Sí se simula un evento observado, se utiliza para calibrar modelos de precipitación o de precipitación-escorrentía (*PRE*).

Si se simula una tormenta de diseño, cuya lámina de agua corresponde a un período de retorno seleccionado ( $Tr$ ), se denomina *PRE (TR)*.

#### **4.2.1.1 DISTRIBUCION ESPACIAL DE LA LAMINA DE PRECIPITACION, CONFORME SE DESARROLLA LA TORMENTA (PATRONES TEMPOAREALES)**

En el literal 1.4, se introdujo los conceptos básicos de patrones areales, definidos como la distribución en el espacio, de la lámina de precipitación acumulada, que muestra cierto orden u organización. Los conceptos sobre este tipo de patrones han sido enfocados desde un punto de vista estático, es decir, independientes de su evolución en el tiempo.

Se analiza a continuación la distribución de la lámina de precipitación en el tiempo en cualquier punto del área bañada, entendida como distribución o patrón areal. Como se verá más adelante, los patrones areales propuestos no se los puede aislar de su progreso en el tiempo. Así en este punto, se ingresa una nueva variable denominada tiempo de desfase cuyo valor define estrictamente el patrón areal y su formación en el tiempo.

La Figura 4.8.a representa las hipótesis 1 y 2, en el eje de las abscisas consta la duración de tormenta y en él las ordenadas del radio de cobertura. El valor de la pendiente negativa, refleja la velocidad media de movimiento de acuerdo a la ecuación (4.2). Si se considera que la duración en el centro de tormenta es igual a un tiempo de fin  $t_f$  menos un tiempo de inicio  $t_i$ , entonces la ordenada de la Figura 4.8.a representa el tiempo en su forma continua. Esta representación del

modelo de lluvias en cuanto a su duración, no es la única forma de representación que satisface las hipótesis 1 y 2.

Como se puede observar, la Figura 4.8.a es equivalente a la Figura.4.8.b cuando la variable  $td$ ; denominada tiempo de desfase, es igual a cero. Por lo tanto la Figura 4.8.a es un caso particular de uno más general, representado en la Figura 4.8.b.

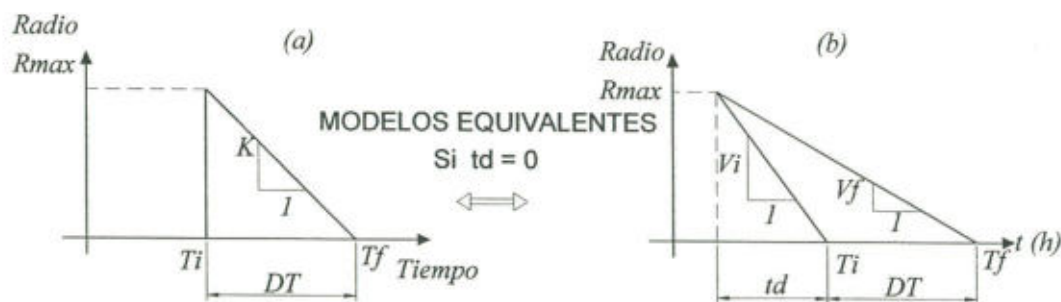

**Fig.Nº.4.8: Modelos equivalentes de la duración de tormenta.**

**(a) caso particular. (b) caso general**

Adicionalmente, surgen las variables  $V_i$  y  $V_f$  que corresponden a las velocidades de un frente de avance y de finalización de tormenta, según se precisa más adelante.

La Figura 4.8.b, muestra que se pueden generar varias tormentas equivalentes, en cuanto a la duración, cambiando solamente el valor de la nueva variable  $td$ . Las múltiples tormentas generadas se caracterizan por que para un radio igual a  $R < R_{max}$ , todas tienen una duración igual a  $dt$ , que dependen exclusivamente de  $R$  y que en lo único que se diferencian es en su adelanto o retraso en el tiempo.

En la Figura 4.3 se observa el efecto de un tiempo de desfase negativo, que resulta en el adelanto de la ocurrencia de la precipitación en un radio igual a radio máximo. Esta particularidad en el modelo es similar a un modelo en chorro de



agua en una pila, donde el agua asciende por el centro y desciende por la periferia. Recuérdese que la teoría columnar de las tormentas (Capítulo 2) es conocida también como teoría del chorro<sup>5</sup>.

Físicamente, el tiempo de desfase es el resultado de múltiples fenómenos complejos actuantes al momento de la formación de la nube de tormenta, que obliga a que el tiempo de inicio de la precipitación, a nivel de superficie, varíe de un radio a otro.

El ingreso de esta nueva variable  $td$  en el cálculo, se entiende como un adelanto ( $td$  negativo) o retraso ( $td$  positivo) entre el tiempo de inicio de la precipitación, que se presenta a radio máximo, y el tiempo de inicio de la precipitación en su centro. La variación del tiempo de desfase generará también múltiples formas de presentación espacial y temporal de la ocurrencia de la precipitación, denominados Patrones Tempoareales.

El **Patrón tempoareal de una célula de tormenta** es la representación de las posibles formas de manifestación de la precipitación de una célula de tormenta en el espacio y tiempo, en su proyección areal.

El análisis para los distintos patrones más importantes se indica en la Figura 4.9, en donde se aprecia 5 escenarios que representan el efecto del cambio del tiempo de desfase, hacia valores negativos, cero, valores menores, iguales y mayores que la duración  $DT$  en el centro de tormenta.

a)  $td < 0$

Un  $td$  negativo indica que la tormenta empieza en un radio máximo, generando un frente de lluvia que avanza hacia el centro con una velocidad ( $V_i$ ). A su paso, causa el inicio de tormenta y es seguido por otro frente con menor velocidad ( $V_f$ ) que a su paso da lugar al fin de tormenta. Avanzando las dos hacia el centro de tormenta, el fin del evento se presenta en su centro. Las velocidades de ambos frentes son constantes y  $V_i > V_f$  (Figura 4.9.a).



b)  $t_d=0$

Un tiempo de desfase igual a cero refleja que la tormenta empieza a la misma hora en toda el área de cobertura y termina en su centro. Nótese en este caso que, la velocidad del frente de inicio  $V_i$ , teóricamente tiene un valor infinito, lo cual debe ser entendido como la simultaneidad del inicio de la lluvia en toda la superficie de cobertura de tormenta (Figura 4.9.b).

c)  $0 < t_d < DT$

Bajo esta consideración el frente de lluvia inicia en el centro de tormenta, avanza paulatinamente con una velocidad  $V_i$  cubriendo más y más área hasta su radio máximo, en este instante y lugar converge el frente de fin de tormenta, el cual avanza desde este punto máximo y acaba en el centro (Figura 4.9.c).

d)  $t_d = DT$

Un tiempo de desfase igual al tiempo de duración en el centro de tormenta indica que el frente de lluvia empieza en su centro, avanza cubriendo cada vez más y más área, para posteriormente terminar al mismo tiempo en toda el área de cobertura de tormenta. Similar a b), la velocidad del frente de fin de lluvia teóricamente es igual a infinito.

e)  $t_d > TD$

Un tiempo de desfase mayor a la duración en el centro  $DT$ , se entiende cuando el frente de inicio de la precipitación comienza en el centro de tormenta, avanza cubriendo más y más área, con una velocidad  $V_i$ . Después de transcurrido un tiempo igual a  $DT$ , se presenta el frente de fin de lluvia que, de igual forma inicia en el centro de tormenta. La velocidad del frente de onda de fin en este caso es mayor a la velocidad de inicio y pronto se logrará que, una región ubicada a radio

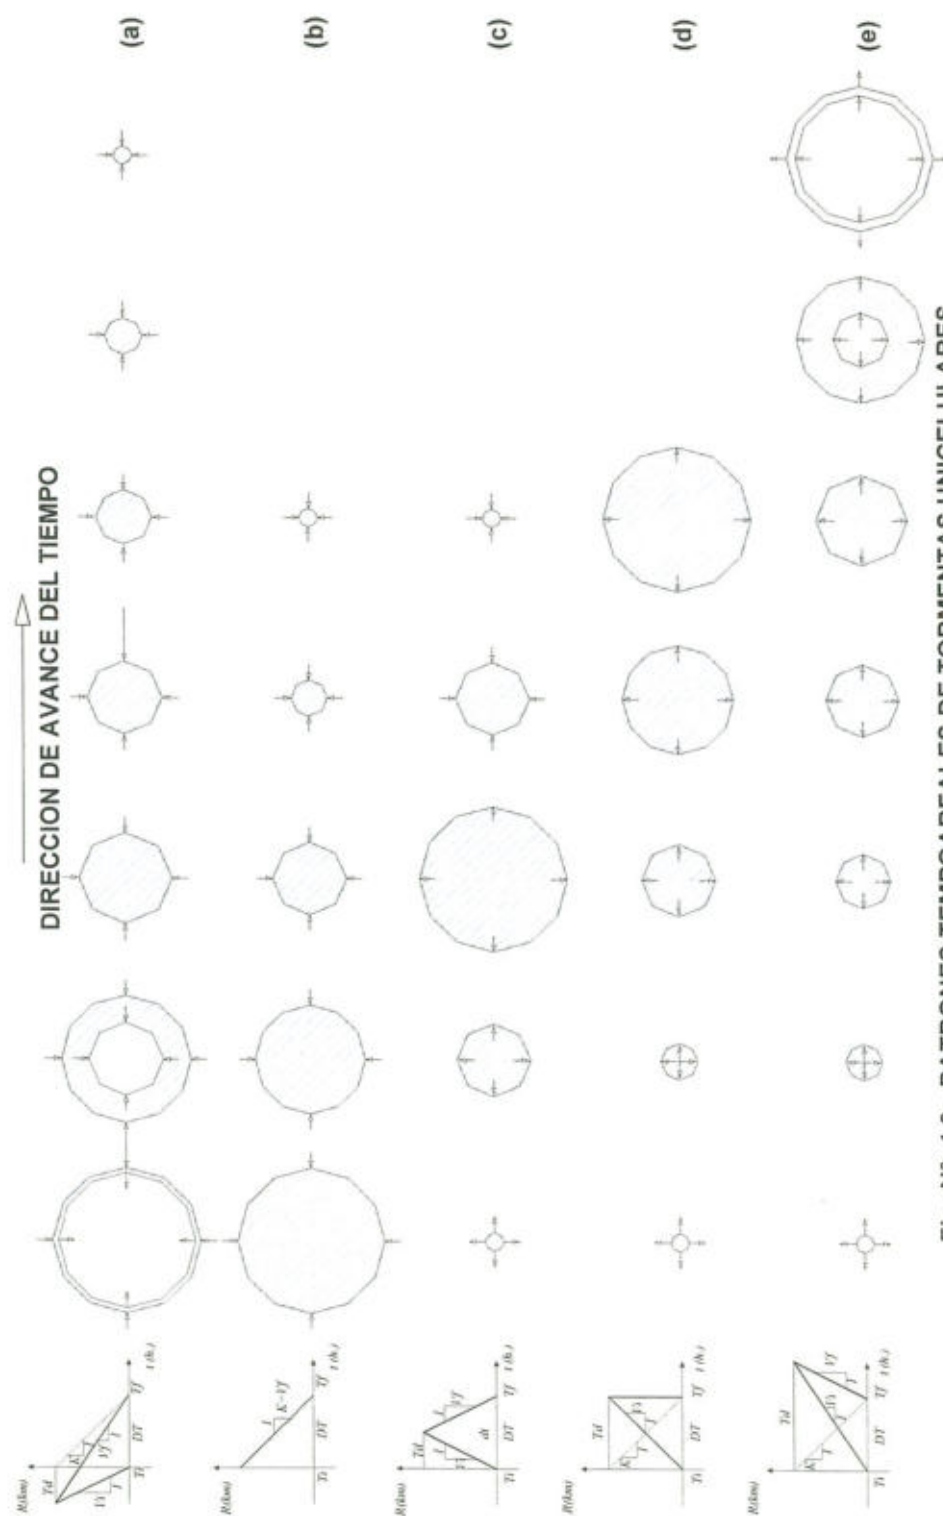

**Fig. N.º 4.9: PATRONES TEMPOAREALES DE TORMENTAS UNICELULARES**  
(Tomado de Beltrán, 1997)

máximo empiece y termine al mismo tiempo. Con esto se termina el evento (Figura 4.9.e).

Como se observa, la duración de lluvia en un punto cualquiera de cobertura de tormenta situado a una distancia  $R < R_{max}$ , es siempre la misma en todos los patrones temporeales anteriormente indicados, sin embargo su evolución en el tiempo es distinta.

Como se analiza posteriormente, el tiempo de desfase se puede obtener mediante mediciones entre horas reloj de inicio y fin de tormenta entre dos estaciones (la estación en que se registra el centro de tormenta y cualquier otra estación pluviográfica).

A continuación se propone el caso general, que permite obtener la relación matemática entre  $td$  y  $K$  con respecto a velocidades de inicio ( $V_i$ ) y fin ( $V_f$ ), dicho análisis es el siguiente (Figura 4.10).

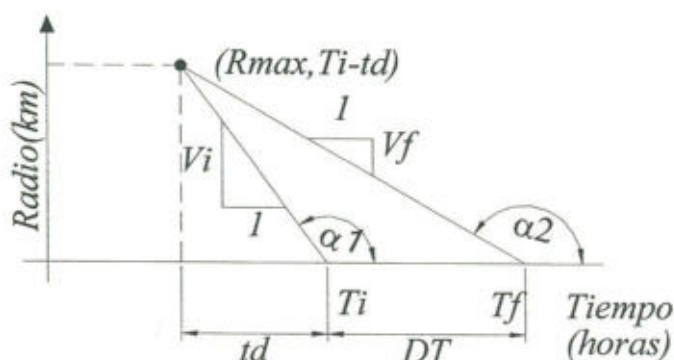

**Fig.Nº.4.10: Representación del modelo de duración de tormenta**

El punto de coordenadas  $(R_{max}, T_i - t_d)$ , genera dos líneas cuyas pendientes representan las velocidades de inicio y fin, su cálculo se lo realiza mediante:

$$V_i = \tan(\alpha_1) = \frac{R_{max}}{t_d} \quad (4.13)$$



$$V_f = \tan(\alpha_2) = \frac{R_{\max}}{DT - td} \quad (4.14)$$

El valor del tiempo de desfase  $td$  toma valores positivos o negativos. En la Figura 4.10, el tiempo de desfase tiene un valor negativo.

Reemplazando (4.5) en (4.13) y (4.14):

$$V_i = \frac{K \cdot DT}{td} \quad (4.15)$$

$$V_f = -\frac{K \cdot DT}{DT - td} \quad (4.16)$$

La  $V_i$  se define como la velocidad de un frente de onda de expansión o contracción que a su paso produce el inicio de tormenta.

La  $V_f$  se define como la velocidad de un frente de onda de expansión o contracción que a su paso produce el fin de tormenta.

El signo positivo de estas velocidades indica que el movimiento es del centro al exterior. Del sector exterior al centro las velocidades tienen signo negativo.

Las ecuaciones de los radios de inicio y fin de tormenta a un tiempo igual a  $t$  son:

$$R_i = V_i \cdot t$$

$$R_i = \frac{K \cdot DT}{td} \cdot t \quad (4.17)$$

$$R_f = V_f \cdot t - V_f \cdot DT = -V_f \cdot (DT - t)$$

$$R_f = \frac{K \cdot DT}{DT - td} \cdot (DT - t) \quad (4.18)$$

La ecuación que define el tiempo de inicio de tormenta a un radio igual a  $R$ , se la puede obtener mediante:

$$t_i = \frac{R}{V_i} \quad (4.19)$$

Reemplazando (4.15) en (4.19);

$$t_i = \frac{R \cdot td}{K \cdot DT} \quad (4.20)$$

El tiempo de fin a un radio igual a  $R$  es:

$$t_f = t_i + dt$$

$$t_f = \frac{R \cdot td}{K \cdot DT} + DT - \frac{R}{K} \quad (4.21)$$

Si se desea calcular el área de cobertura de tormenta para un tiempo igual a  $t$ , los radios  $R_i$  y  $R_f$  resultantes indicarán los límites de tormenta interior y exterior respectivamente.

En el caso que se desee conocer el tiempo de inicio y fin de tormenta en un punto particular ubicado a un radio igual a  $R$ , se emplea las ecuaciones (4.20) y (4.21).

Las velocidades de los frentes de lluvia de inicio y fin, representadas por las ecuaciones (4.15) y (4.16), pueden ser deducidas analizando los registros pluviográficos simultáneos de dos estaciones climatológicas, con las siguientes ecuaciones:

$$V_i = \frac{ti_1 - ti_c}{Dist.} \quad (4.22)$$

$$V_f = \frac{tf1 - tfc}{Dist.} \quad (4.23)$$

En donde;  $ti_I$  y  $tf_I$  representan la hora de registro, del inicio y fin de tormenta respectivamente, en la estación 1 ubicada en cualquier punto interno de cobertura de tormenta.

$ti_c$  y  $tf_c$  representan la hora de registro del inicio y fin de tormenta respectivamente, en la estación principal ubicada en el centro de tormenta.

$Dist.$ , es la distancia entre las estaciones.

Se debe tener cuidado en que, una de las estaciones registre el centro de tormenta, y además, se observe el gráfico característico de una célula de tormenta, es decir, el ascenso claro en la faja pluviográfica y su posterior abatimiento.

De forma preliminar, se considera que una de las estaciones se encuentra en el centro de tormenta, si para un grupo importante de tormentas seleccionadas se escoge solamente aquellas con mayor precipitación y duración. En este caso el centro de tormenta preliminar se halla ubicado en la Estación Quito-Observatorio.

Se debe recordar que las ecuaciones (4.22) y (4.23) consideran de forma simultánea, los fenómenos de formación de una nube de tormenta y el fenómeno de traslación de la nube debido a los vientos regionales, en tanto que las ecuaciones (4.15) y (4.16) solamente reflejan el fenómeno de formación de una nube de tormenta. Por tanto, el cálculo de  $V_i$  y  $V_f$  expresados por las ecuaciones (4.22) y (4.23) deben entenderse como preliminares.

Una vez obtenido los valores preliminares de la velocidad del frente de inicio y de fin, estas pueden reemplazarse en las ecuaciones (4.15) y (4.16) para determinar los valores de  $td$  y  $K$ , dentro de un sistema de dos ecuaciones con dos incógnitas.

Inicialmente se resuelven las ecuaciones (4.22) y (4.23) para 18 tormentas del grupo de las tormentas seleccionadas (Ver Cuadro 4.2). Con esta información se



calcula los valores de  $K$  y  $t_d$  con las ecuaciones (4.15) y (4.16), se toma la duración  $DT$  igual a la duración en el centro de tormenta preliminar (Estación Quito-Observatorio). Como se analiza en el numeral 4.3, el centro de tormenta definitivo del modelo se obtiene simulando el efecto del viento en el movimiento de una célula de tormenta, apoyado en la capacidad de programación de un Sistema de Información Geográfico (ArcView).

La Figura 4.11 resume los resultados obtenidos al representar la velocidad media de tormenta  $K$  en función de la duración de lluvia en la estación Quito-Observatorio. En esta figura se observa que para eventos de bajas duraciones, la velocidad media  $K$  tiene valores altos, y para eventos de altas duraciones, la velocidad media  $K$  asume valores bajos.

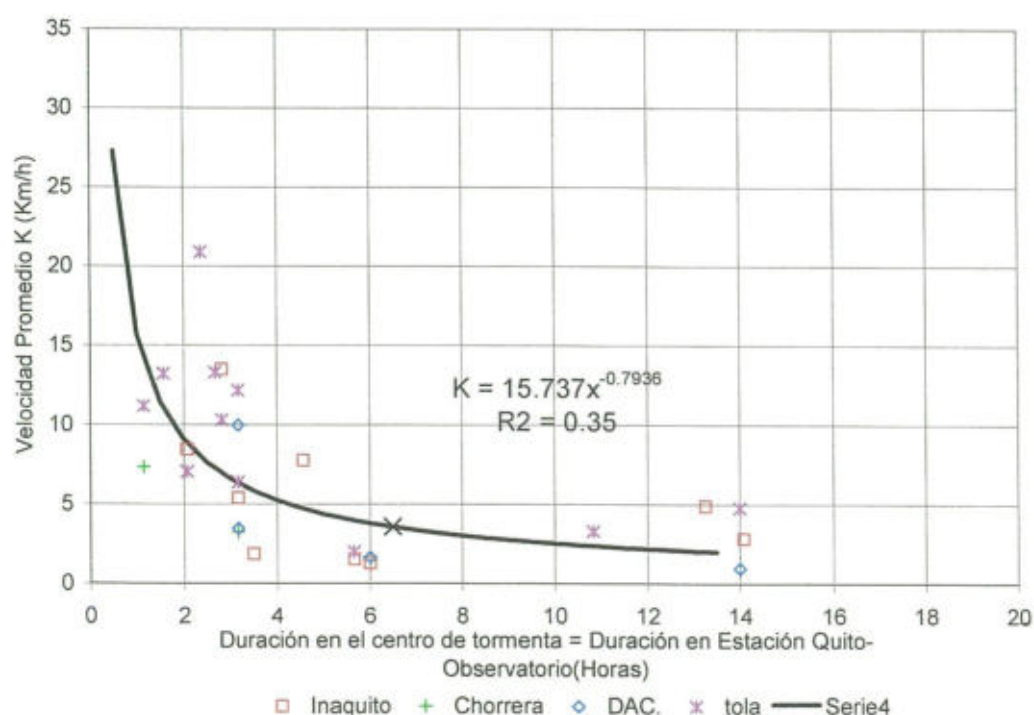

**Fig.Nº.4.11:** Relación preliminar entre  $K$  y Duración de lluvia en el centro.

**Ejemplo N°1:**

Se tiene una tormenta en cuyo centro se precipitan 30 mm de lluvia en dos horas. El tiempo de desfase es igual a 1 hora, la velocidad promedio de movimiento  $K$  es de 9 km/h (Figura 4.11), el valor del parámetro  $n$ , obtenido de la Figura 4.7, es igual a 4.5

|        |       |   |            |
|--------|-------|---|------------|
| Datos: | $DT$  | = | 2 (h)      |
|        | $Td$  | = | 1 (h)      |
|        | $K$   | = | 9.0 (km/h) |
|        | $PRE$ | = | 30 mm      |
|        | $n$   | = | 4.5        |

¿Cuál es la velocidad de expansión y fin de la tormenta?

De (4.15) y (4.16); Las velocidades de inicio y fin son:

$$V_i = \frac{9.0[km/h] \cdot 2[h]}{1[h]} = 18.0[km/h]$$

$$V_f = -\frac{9.0[km/h] \cdot 2.0[h]}{2[h] - 1[h]} = -18.0[km/h]$$

¿Cuál es la duración a un radio igual a 2 km?

De (4.4), la duración de tormenta para un radio igual a 2 km es:

$$dt = 2[h] - \frac{2.0[km]}{9[km/h]} = 1.77[h]$$

¿Cuál es la hora de inicio y fin e la precipitación a un radio igual a 2 km?

De (4.20) y (4.21); los tiempos de inicio y fin de tormenta son:

$$t_i = \frac{2.0[km]}{18[km/h]} = 0.11[h]$$

$$t_f = 0.11[h] + 1.77[h] = 1.88[h]$$

¿Cuál es la precipitación a un radio igual a 2 km?

De (4.9) la precipitación en un radio igual a 2 km es:

$$pre = \frac{PRE}{DT^n} \cdot dt^n = \frac{30}{2^{4.5}} \cdot 1.777^{4.5}$$

$$P = 17.66[mm]$$

Si la duración de tormenta en un punto es 1 hora, ¿A qué distancia se encuentra el centro de la tormenta?

De (4.3);

$$R = (DT - dt) \cdot K = (2.0[h] - 1.00[h]) \cdot 9.0[km/h] = 9.0[km]$$

Si la precipitación en un punto es igual a 10 mm ¿A qué distancia se encuentra el centro de la tormenta?.

Despejando  $dt$  de (4.9);

$$dt = \left(\frac{pre}{PRE}\right)^{\frac{1}{n}} \cdot DT = \left(\frac{10[mm]}{30[mm]}\right)^{\frac{1}{4.5}} \cdot 2[h] = 1.57[h]$$

y reemplazando  $dt$  en (4.3);

$$R = (DT - dt) \cdot K = (2.0[h] - 1.57[h]) \cdot 9.0[km/h] = 3.87[km]$$



#### 4.2.2 DISTRIBUCION TEMPORAL DE LA LLUVIA

La distribución temporal se refiere a la variación de la precipitación acumulada en el tiempo. La Figura 3.2, presenta la distribución temporal de dos estudios realizados en distintos lugares y fechas. El nivel de probabilidad asignado a las curvas de la Figura 3.2.b, corresponde a la probabilidad de excedencia entre las 172 tormentas analizadas<sup>6</sup>. El nivel igual a 19% de probabilidad indicada en dicho gráfico, sugiere que existe una probabilidad del 19% de que una de las tormentas analizadas se presente por sobre el gráfico respectivo.

La distribución temporal de una tormenta puede ser utilizada según el objetivo del estudio. En unos casos, para análisis de tormentas de diseño y en otros, para ajuste de modelos precipitación-escorrentía. Dentro de los primeros, estos pueden tener una probabilidad asignada o representar simplemente una forma sustentada de la forma de la lluvia en el tiempo. Los segundos, y los más importantes dentro del presente estudio, consisten en formas de lluvias que tienen el objetivo de ajustarse lo mejor posible a un pluviograma de lluvia observado.

Del estudio de tormentas en Quito<sup>6</sup>, se llegó a la conclusión que la distribución temporal del cuartil 1, según el análisis estadístico de Huff, es la más frecuente en Quito. Es así que, con el propósito de la modelación matemática se hace necesario obtener una ecuación que represente estas distribuciones.

Las curvas adimensionales deben tener dos condiciones:

- Tener un valor igual a uno en la precipitación cuando la duración adquiere un valor también igual a uno
- Tener un valor igual a cero en la precipitación cuando la duración adquiere un valor también igual a cero.

La función escogida es:

$$P(t) = \frac{1 - 10^{-\frac{(t/K_2)}{1 - 10^{-\frac{1}{K_2}}}}}{1 - 10^{-\frac{1}{K_2}}} \quad K_2 = f(DUR) \quad (4.24)$$

$$0 \leq t \leq 1$$

$$0 \leq P(t) \leq 1$$

$P(t)$ , representa una función que relaciona la precipitación con el tiempo  $t$  expresado en forma **adimensional**. El efecto de un cambio en el valor del coeficiente  $K_2$  en la ecuación (4.24), se refleja en una forma distinta de la función, pero que, en todos los casos, siempre cumple las condiciones de borde indicadas anteriormente. La Figura 4.12, representa la ecuación (4.24)

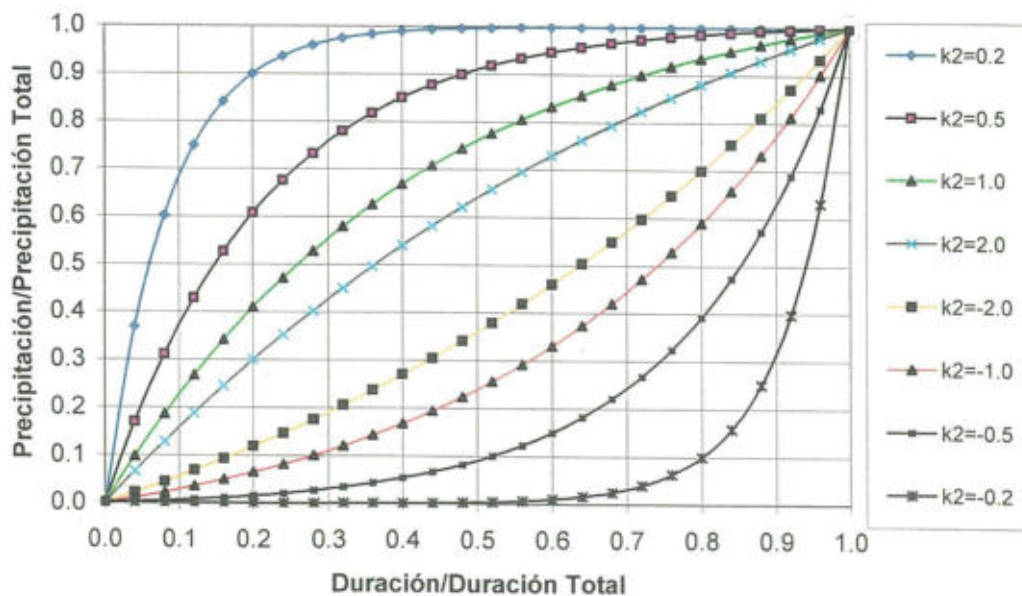

**Fig.Nº. 4.12:** Distribución temporal de la lluvia adimensional

El término adimensional se lo utiliza para indicar los resultados de dividir la duración y precipitación para la duración máxima y precipitación máxima respectivamente. Por lo que, si se incluye en la función (4.24) la precipitación total y la duración en el centro de tormenta, se obtiene una ecuación de la siguiente forma:

$$P(t) = PRE \cdot \frac{1 - 10^{-\left[\frac{t}{K_2 \cdot DT}\right]}}{1 - 10^{-\left(1/K_2\right)}} \quad (4.25)$$

$$0 \leq t \leq DT$$

$$0 \leq P(t) \leq PRE$$

En donde:

$P(t)$  = Precipitación al tiempo  $t$  en el centro de tormenta

$PRE$  = Precipitación Total en el centro de tormenta

$DT$  = Duración de la tormenta en su centro

$t$  = Tiempo

$K_2$  = Coeficiente que define la forma de la distribución temporal

A los gráficos resultantes de variar el coeficiente  $K_2$  en la ecuación (4.24) se los ha comparado con las distribuciones temporales de la Figura 3.2.b. Los valores obtenidos para  $K_2$  son los siguientes:

| Valor de $K_2$ | Nivel de Probabilidad |
|----------------|-----------------------|
| 0.27           | Primer cuartil 19%    |
| 0.34           | Primer cuartil 26%    |
| 0.42           | Primer cuartil 36%    |
| 0.50           | Primer cuartil 45%    |
| 0.60           | Primer cuartil 59%    |

**Cuadro N°4.2:** Valores del coeficiente de forma de la distribución temporal  $K_2$  asociado con los patrones temporal más frecuentes en Quito.



Si se agrupa el denominador en una constante  $K_3$  de la siguiente forma:

$$K_3 = 1 - 10^{-(1/K_2)} \quad (4.26)$$

La ecuación obtenida es:

$$P(t) = PRE \cdot \frac{1 - 10^{\left[-\frac{t}{K_2 \cdot DT}\right]}}{K_3} \quad (4.27)$$

La ecuación (4.27) es práctica por su sencillez y permite cambiar rápidamente la forma de la distribución temporal de lluvia, con tan solo modificar el parámetro  $K_2$ . Esta ecuación es aplicable solamente para un punto de análisis, que es el centro de la tormenta (CT), en donde la duración es igual a  $DT$  y la precipitación igual a  $PRE$ .

La ecuación (4.27) puede ser expresada para cualquier punto interno de tormenta de la siguiente forma:

$$P(t') = Pre \cdot \frac{1 - 10^{\left[-\frac{t'}{K_2 \cdot dt}\right]}}{K_3} \quad (4.28)$$

El paso de la ecuación (4.27) a la ecuación (4.28), implica aceptar que todos los puntos de cobertura de tormenta tendrán la misma distribución adimensional de lluvia, lo cual expresa los requerimientos de la hipótesis 4.

Como se observa en el numeral 4.3, la distribución temporal de la lluvia es influenciada por los vientos predominantes durante la ocurrencia del evento de tormenta. El ingreso del viento, tanto en magnitud como en dirección, cambia la ocurrencia en el tiempo de la lluvia en todos y cada uno de los puntos de cobertura.

### 4.2.3 INTEGRACIÓN DEL MODELO COMPLEMENTANDO LA DISTRIBUCIÓN TEMPORAL Y LOS PATRONES TEMPOAREALES

Para conformar el modelo se requiere complementar los conceptos de la distribución temporal y de los parámetros tempoareales en uno solo, para posteriormente representarlos en una sola ecuación.

Se debe recordar que:

- La ecuación (4.10) expresa la lámina de precipitación total en dependencia del radio respecto al centro de tormenta  $R$ .
- Las ecuaciones (4.20) y (4.21) expresan el tiempo de inicio y fin de lluvia respectivamente, para cualquier punto ubicado a un radio  $R$  del centro de tormenta.
- La ecuación (4.28) expresa la distribución de la lluvia en el tiempo, en dependencia de la precipitación total y la duración total en dicho punto.

La precipitación total en cualquier punto al interior del área llovida depende de parámetros y condiciones de borde. Definidos estos, la precipitación puede ser estimada en función solamente del radio respecto al centro de tormenta.

Las ecuaciones (4.20) y (4.21) expresan la formación de la precipitación en dependencia de la variable tiempo, en tanto que la ecuación (4.28) expresa la precipitación respecto a un tiempo de inicio  $t'$ . La relación entre  $t'$  y tiempo de inicio puede obtenerse de la Figura 4.13.

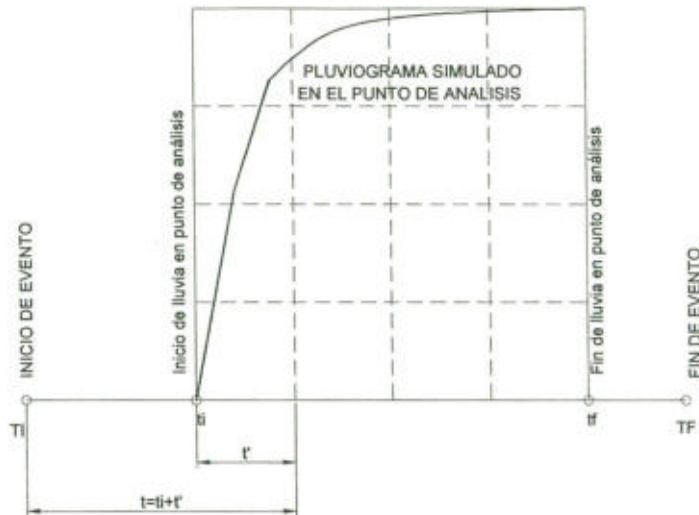

**Fig.Nº. 4.13:** Relación entre tiempo de inicio de tormenta en un punto cualquiera y en el centro de tormenta.

Entonces,

$$t' = t - ti \quad (4.29)$$

Donde;  $ti$  está definido por la ecuación <sup>4.20</sup> (4.29)

$t$ , es el tiempo.

Por tanto, la integración del modelo requiere reemplazar las ecuaciones (4.4), (4.9), y (4.29) en la ecuación (4.28). Con esto, se genera una ecuación por un lado dependiente del tiempo y por otro, asociado al radio de análisis respecto a un centro de tormenta.

Lo indicado se presenta a continuación:

$$P(t, R) = PRE \cdot \frac{(DT - \frac{R}{K})^n}{DT^n} \cdot \frac{(1 - 10^{-\left[ \frac{t - ti}{K_2 (DT - \frac{R}{K})} \right]})}{K_3} \quad (4.30)$$



En donde;

$P(t,R)$  es la precipitación a tiempo  $t$  y radio  $R$  en mm,

$T_i$  es el tiempo de inicio a radio igual a  $R$ , definido por ecuación (4.20),

$PRE$  es la precipitación máxima en el centro de tormenta en mm,

$DT$  es la duración de la tormenta en su centro en horas,

$R$  es el radio de tormenta en km,

$K_2$  es el parámetro de distribución temporal,

$K_3$  es una constante definida por ecuación (4.29),

$K$  Variable que representa la velocidad media de movimiento de Tormenta,

$t$  Tiempo; Válido entre:  $t_i \leq t \leq t_f$ , y

$n$  Parámetro de forma.

La ecuación (4.30) incluye los conceptos de partida para la generación del modelo de lluvia propuesto. Se debe recordar que esta ecuación representa un caso particular del genérico, en el cual interviene el coeficiente  $m$  de la ecuación (4.3)

## Ejemplo N°2

Para el ejemplo N°1, se desea conocer la ecuación y el gráfico que determine la precipitación en el tiempo, de un punto ubicado en el Centro de Tormenta y para otro ubicado a 2 km. La distribución temporal de lluvia debe tomar en cuenta una probabilidad de ser superada menor o igual al 19% de los eventos del primer cuartil registrados en Quito.

Solución:

Del cuadro 4.2, para una probabilidad de ser superado igual a 19%,  $K_2$  toma el valor de 0.27.

De la ecuación (4.26):

$$K_3 = 0.9998 \approx 1$$

Y reemplazando los datos del ejemplo 1 en (4.30),

Para  $R = 0$  km:

$$P(t,0) = 30 \cdot \left(1 - 10^{-\left[\frac{t}{0.54}\right]}\right); \quad 0 \leq t \leq 2$$

Para  $R = 2$  km:

$$P(t,2) = 17.66 \cdot \left(1 - 10^{-\left[\frac{t-0.11}{0.48}\right]}\right); \quad 0.11 \leq t \leq 1.88$$

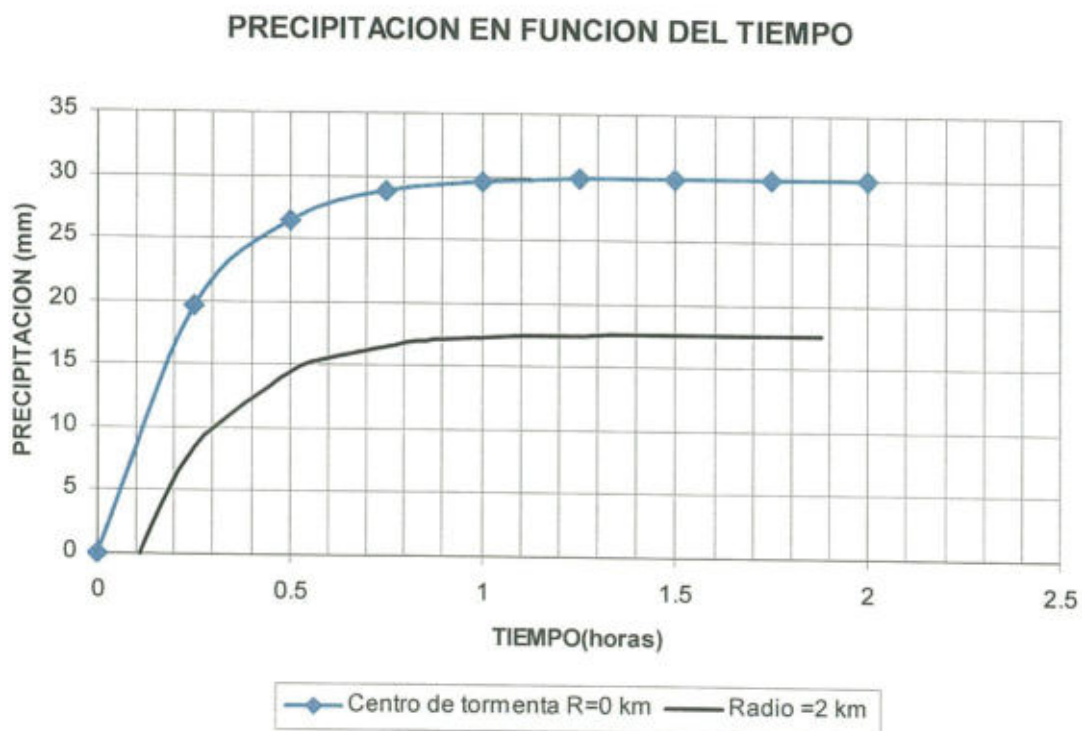

**Fig.Nº. 4.14:** Pluviogramas simulados para el centro de tormenta y para un punto situado a radio igual a 2 km en el ejemplo N°2.

## 4.3 CALIBRACIÓN DEL MODELO

### 4.3.1 INTRODUCCIÓN

La calibración es el proceso de ajuste de los parámetros presentes en un modelo que se consideren representativos en el fenómeno de estudio.

La calibración, dentro de la metodología clásica en modelos hidrológicos, parte de una serie de datos observados, de los cuales, una parte son utilizados para el proceso de calibración y la otra, para el proceso de validación<sup>4</sup>. En estas fases del modelo, existe un determinado grado de subjetividad involucrado<sup>8</sup>.

En un proceso de “aproximación indirecta”, la estimación de los parámetros, se mejora de forma iterativa, considerando un criterio de error de salida, hasta que la respuesta del modelo sea suficientemente cercana a los medidos<sup>20</sup>.

Realizado el proceso de calibración, el rendimiento del modelo se verifica comparando eventos adicionales observados y los generados por el modelo. Terminado este proceso denominado validación, el modelo queda apto para su utilización en múltiples escenarios de estudio.

La aplicación de un modelo supone que las circunstancias bajo las que se calibró el modelo, se repiten al momento de su aplicación. Dado que esto es imposible, todo modelo intenta simular un fenómeno con una cierta probabilidad o certeza de ocurrencia. Además, el modelo es aplicable solamente en el rango de los valores de las variables analizadas. De aquí que la extrapolación de los resultados debe ser tomada con cuidado para tomar decisiones.

Como ejemplo del proceso de calibración, se menciona al modelo del método racional, utilizado para representar el caudal de crecida en un punto de una cuenca de análisis en base a datos de precipitación.



Si mediante mediciones de campo se obtiene la cantidad de lluvia que cae en una zona y su hidrograma de crecida, el modelo del método racional se puede aplicar para obtener un coeficiente que relacione la precipitación con el escurrimiento; a este valor se lo denomina coeficiente de escurrimiento. Si este procedimiento se repite para varios eventos de lluvia y los resultados de este coeficiente son lo suficientemente representativos, entonces, se llega a calibrar el modelo para las características tanto físicas como meteorológicas de la cuenca. Este coeficiente es un parámetro del modelo y durante la modelación de otros eventos permanece constante. Debido a algunas incertidumbres durante las mediciones, en este ejemplo, para el uso posterior del coeficiente de escurrimiento sugerido, en varias bibliografías, se requiere mencionar el rango factible y recomendable de uso.

El proceso de validación, consiste en el proceso inverso. En este caso, se debe obtener el caudal de crecida partiendo de la precipitación registrada y el coeficiente de escurrimiento obtenido. Si los resultados están dentro de un rango de aceptabilidad, según algún criterio, el modelo es validado.

La calibración en el modelo de lluvias propuesto se orienta a obtener relaciones funcionales entre los elementos del modelo, con la suficiente confianza, que representen el comportamiento de las tormentas unicelulares observadas. El hecho de aceptar que las tormentas simuladas se encasillan dentro de algún tipo de ley, constituye ya, suficiente respaldo tanto para calibrar el modelo como para validarlo.

#### **4.3.2 DATOS UTILIZADOS**

Los datos utilizados corresponden a 38 tormentas, antes referidos. El cuadro 4.3 presenta los registros de pluviométricos de éstas tormentas obtenidos en seis estaciones meteorológicas en Quito. Se dispone, por supuesto de las coordenadas (tiempo, precipitación) que definen la forma del pluviograma en cada una de las estaciones.

Del total se han seleccionado 15 tormentas para el análisis y calibración del modelo propuesto. En el cuadro 4.4, se presentan estos datos.

Los criterios adoptados para dicha selección son los siguientes:

- Las tormentas que tengan registro simultáneo en tres o más estaciones
- Debido a que se asume que el centro de tormenta es la estación Quito-Observatorio, no se toman en cuenta los registros de la estación Izobamba por considerarla muy lejana para registrar tormentas unicelulares simultáneamente, excepto el caso de la tormenta 1, en la cual se observó lo contrario.
- Se eliminan las tormentas compuestas, es decir aquellas presumiblemente formadas por varias células. Esto se consigue observando en los pluviogramas ascensos significativos de lluvia, separados por intervalos de varios minutos sin lluvia.

El modelo propuesto requiere para su aplicación un mínimo de dos estaciones que registren un evento de lluvia simultáneamente. En estos casos, los resultados de la simulación es muy precisa (observar el ejemplo en el Anexo D, de la tormenta del 26 abril de 1989, Cuadro D.16). Lamentablemente el análisis de los registros en dos estaciones, puede indicar sola una componente de los vientos, en la dirección de la línea que une las dos estaciones. Esto evidentemente provoca un error, y para evitarlo, se eliminan los eventos registrados solamente en dos estaciones.



| N° | Fecha de tormenta |     |     | Estación  |          |         |      |          |            |
|----|-------------------|-----|-----|-----------|----------|---------|------|----------|------------|
|    | Año               | Mes | Día | Q.Observ. | Izobamba | Ñaquito | Tola | Chorrera | Aeropuerto |
| 1  | 1992              | 12  | 20  | 35,4      | ---      | 22,6    | ---  | ---      | ---        |
| 2  | 1991              | 11  | 25  | 29,0      | ---      | 6,6     | 13,5 | ---      | ---        |
| 3  | 1991              | 3   | 23  | 21,2      | 12,5     | ---     | 1,5  | ---      | ---        |
| 4  | 1991              | 3   | 11  | 34,0      | 11,2     | 12,7    | 0,3  | ---      | ---        |
| 5  | 1991              | 1   | 11  | 20,2      | 26,0     | ---     | 29,5 | ---      | ---        |
| 6  | 1989              | 9   | 25  | 34,8      | 22,6     | 37,8    | ---  | ---      | ---        |
| 7  | 1989              | 9   | 22  | 29,8      | 3,4      | 2,5     | ---  | ---      | ---        |
| 8  | 1989              | 4   | 26  | 33,7      | 12,0     | 9,7     | ---  | ---      | ---        |
| 9  | 1989              | 8   | 23  | 27,2      | ---      | 10,9    | ---  | ---      | ---        |
| 10 | 1987              | 9   | 6   | 27,3      | 12,5     | 14,2    | 9,9  | ---      | ---        |
| 11 | 1987              | 5   | 22  | 44,6      | 23,0     | 19,0    | 29,2 | ---      | ---        |
| 12 | 1987              | 5   | 6   | 33,2      | 5,9      | 7,9     | 1,9  | ---      | ---        |
| 13 | 1987              | 1   | 19  | 36,4      | 3,0      | 12,6    | 2,5  | ---      | ---        |
| 14 | 1986              | 12  | 23  | 34,6      | 5,6      | 9,5     | 0,0  | ---      | 1,6        |
| 15 | 1986              | 11  | 17  | 55,3      | 20,6     | 8,2     | 9,0  | ---      | 3,6        |
| 16 | 1986              | 4   | 9   | 28,0      | ---      | 18,0    | 9,0  | ---      | ---        |
| 17 | 1986              | 3   | 12  | 29,0      | 23,0     | 30,0    | 21,5 | ---      | ---        |
| 18 | 1985              | 12  | 26  | 21,9      | 16,9     | ---     | 0,0  | ---      | 13,2       |
| 19 | 1985              | 10  | 9   | 22,3      | 5,6      | 9,4     | 2,1  | ---      | 2,8        |
| 20 | 1985              | 5   | 5   | 20,3      | 5,4      | ---     | 1,6  | ---      | 4,1        |
| 21 | 1985              | 5   | 10  | 25,0      | 66,0     | 0,0     | 44,3 | ---      | ---        |
| 22 | 1984              | 8   | 20  | 32,3      | 11,3     | ---     | 9,8  | 10,0     | 13,3       |
| 23 | 1984              | 4   | 30  | 25,1      | 20,0     | ---     | 4,3  | 31,5     | 12,4       |
| 24 | 1984              | 2   | 16  | 29,6      | 13,6     | ---     | 7,0  | 9,3      | 6,6        |
| 25 | 1984              | 2   | 10  | 27,5      | 11,4     | ---     | 0,4  | 10,0     | 7,9        |
| 26 | 1983              | 8   | 30  | 41,3      | 7,8      | 64,1    | 1,4  | ---      | ---        |
| 27 | 1983              | 5   | 24  | 35,4      | 8,1      | 17,4    | 2,5  | ---      | ---        |
| 28 | 1983              | 3   | 14  | 42,4      | 8,5      | 0,0     | 1,8  | ---      | ---        |
| 29 | 1982              | 12  | 7   | 30,7      | 9,0      | 28,3    | 2,8  | 6,8      | 17,8       |
| 30 | 1982              | 10  | 4   | 34,1      | 0,6      | 7,0     | 2,8  | 19,6     | 15,5       |
| 31 | 1982              | 9   | 19  | 37,5      | 3,6      | 9,5     | 2,2  | 18,0     | 15,6       |
| 32 | 1982              | 11  | 19  | 22,8      | 1,1      | 2,8     | 5,5  | 18,1     | 1,9        |
| 33 | 1981              | 12  | 29  | 32,0      | ---      | ---     | 17,5 | ---      | ---        |
| 34 | 1981              | 8   | 23  | 31,7      | ---      | 3,0     | 3,6  | ---      | ---        |
| 35 | 1981              | 3   | 21  | 26,7      | 3,5      | 14,3    | 20,7 | ---      | ---        |
| 36 | 1980              | 11  | 28  | 36,4      | 1,2      | 6,8     | 44,2 | 12,8     | ---        |
| 37 | 1980              | 12  | 26  | 51,6      | 1,4      | 4,0     | 13,1 | 12,7     | ---        |
| 38 | 1980              | 10  | 20  | 32,1      | 10,2     | 2,5     | 6,1  | 7,3      | ---        |

Nota: (---) Dato no disponible

**Cuadro N°.4.3:** Registros de tormentas en Quito consideradas en este estudio (Tomado de Beltrán, 1995).



| N° | Fecha de tormenta |     |     | Estación  |          |         |      |          |            | N° de Estaciones |
|----|-------------------|-----|-----|-----------|----------|---------|------|----------|------------|------------------|
|    | Año               | Mes | Día | Q.Observ. | Izobamba | ñaquito | Tola | Chorrera | Aeropuerto |                  |
| 1  | 1989              | 9   | 22  | 29.8      | 3.4      | 2.5     | ---  | ---      | ---        | 3                |
| 2  | 1986              | 12  | 23  | 34.6      | 5.6      | 9.5     | 0    | ---      | 1.6        | 5                |
| 3  | 1986              | 11  | 17  | 55.3      | 20.6     | 8.2     | 9    | ---      | 3.6        | 5                |
| 4  | 1986              | 4   | 9   | 28        | ---      | 18      | 9    | ---      | ---        | 3                |
| 5  | 1985              | 5   | 5   | 20.3      | 5.4      | ---     | 1.6  | ---      | 4.1        | 4                |
| 6  | 1984              | 2   | 16  | 29.6      | 13.6     | ---     | 7    | 9.3      | 6.6        | 5                |
| 7  | 1983              | 3   | 14  | 42.4      | 8.5      | 0       | 1.8  | ---      | ---        | 4                |
| 8  | 1982              | 12  | 7   | 30.7      | 9        | 28.3    | 2.8  | 6.8      | 17.8       | 6                |
| 9  | 1982              | 10  | 4   | 34.1      | 0.6      | 7       | 2.8  | 19.6     | 15.5       | 6                |
| 10 | 1981              | 8   | 23  | 31.7      | ---      | 3       | 3.6  | ---      | ---        | 3                |
| 11 | 1981              | 3   | 21  | 26.7      | 3.5      | 14.3    | 20.7 | ---      | ---        | 4                |
| 12 | 1980              | 11  | 28  | 36.4      | 1.2      | 6.8     | 44.2 | 12.8     | ---        | 5                |
| 13 | 1980              | 12  | 26  | 51.6      | 1.4      | 4       | 13.1 | 12.7     | ---        | 5                |
| 14 | 1980              | 10  | 20  | 32.1      | 10.2     | 2.5     | 6.1  | 7.3      | ---        | 5                |
| 15 | 1984              | 2   | 10  | 27.5      | 11.4     | ---     | 0.4  | 10       | 7.9        | 5                |

**Cuadro N°.4.4:** Registros pluviométricos de tormentas en Quito, seleccionadas para calibración de modelo.

#### 4.3.3 ELEMENTOS DEL MODELO

##### Parámetros del modelo

Un parámetro dentro de un modelo es un elemento para la cual se asume un valor constante durante la ejecución de una rutina o subrutina del modelo. Puede tomar un valor diferente cada vez que se ejecuta la rutina, pero durante el proceso permanece constante.

Por lo tanto, el coeficiente  $n$ , que define la forma de la precipitación en el espacio, la velocidad media de movimiento  $K$ , y el tiempo de desfase  $td$ , son parámetros característicos dentro del modelo y permanecen constantes para cada evento simulado.

## Condiciones de borde

Las condiciones de borde toman un rol importante dentro de la simulación. Dado que de ellas depende toda la generación de resultados. Para todo modelo que represente un sistema complejo, las condiciones de borde deben ser conocidas o derivadas mediante un proceso de medición directa, utilizando la instrumentación adecuada.

En el modelo, las condiciones de borde consisten en determinar el valor de la precipitación total *PRE* y la duración total *DT* en el centro de tormenta.

Como se indicó anteriormente, se considera que el centro de tormenta *CT* se encuentra ubicada en una estación de medición (estación principal), cuando dentro de un grupo importante de eventos de tormentas, registradas en esta estación, se escoge solamente aquellas con mayor precipitación.

Se menciona que en el año 1993, en la estación Iñaquito-Bodegas ubicada al norte de la ciudad de Quito, se registraron 81 días con eventos de lluvias. En tanto que, en la estación Izobamba; al sur de la ciudad, se registraron 108 días<sup>6</sup>. El hecho de escoger la primera, las dos primeras, o las tres primeras con mayor lámina de precipitación, asegura que la estación de registro se encuentra muy próxima al centro de tormenta. Admitir inicialmente que los valores de *PRE* y *DT* de las condiciones de borde son la precipitación y duración de la estación principal es una aproximación aceptable y justificable.

Lo indicado anteriormente es válido dentro del modelo, solamente cuando el centro de tormenta *CT* permanece inmóvil para cada evento simulado.

Si se considera los vientos regionales o simplemente los locales que producen el movimiento de la tormenta en una dirección claramente identificada, la ubicación del centro de tormenta no corresponde a la ubicación de la estación principal. El

centro de tormenta se trasladará una distancia; dependiendo de la dirección y magnitud del viento.

En las Figuras 4.15.a y 4.15.b se puede observar el modelo de lluvia con y sin vientos respectivamente. En estas, el centro de tormenta CT, se ha trasladado por el efecto de incluir al viento, una distancia  $L$ . De igual forma, la precipitación en el punto máximo de la Figura 4.15.b, ha disminuido, o se ha abatido al paso del tiempo.

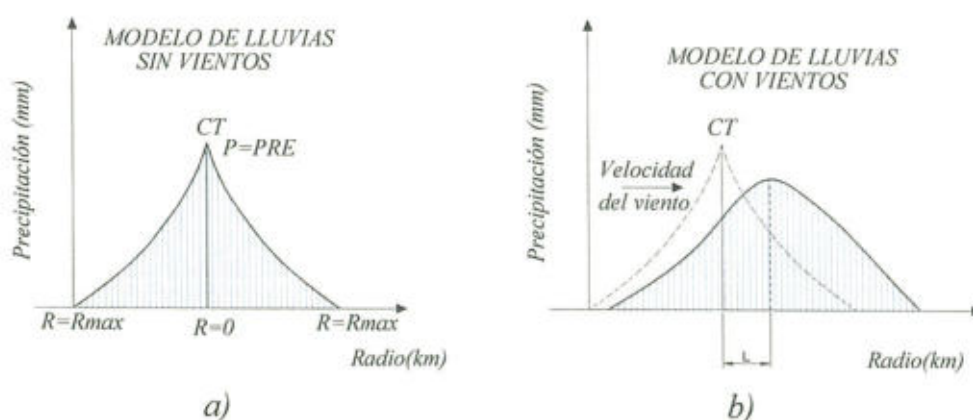

**Fig.N°. 4.15:** Influencia del viento en la simulación (a) sin viento (b) con viento.

La inclusión de los vientos afecta en forma espacial y temporal a todos y cada uno de los puntos de tormenta en el modelo, produciendo en ellos el cambio de los valores de  $pre$ ,  $dt$ ,  $ti$  y  $tf$ .

Por lo tanto, al considerar los vientos en el modelo propuesto, las condiciones de borde son las siguientes:

- $PRE$ , es la precipitación en el centro de tormenta y se obtiene mediante un proceso iterativo de ajuste según un criterio de error.
- $DT$ , es la duración en el centro de tormenta y se obtiene mediante un proceso iterativo de ajuste según un criterio de error.



- *Longitud y Latitud* del centro de tormenta, corresponden a las coordenadas de un punto ubicado a una distancia de la estación principal dependiente de la magnitud y dirección de los vientos predominantes.
- La velocidad y dirección del viento.

### Variables del modelo

A diferencia de los parámetros, las variables asumen varios valores durante el ejercicio del modelo. Entre estas se tiene:

- El punto de análisis  $(X_i, Y_i)$ , respecto al centro de tormenta  $CT$ . En términos de coordenadas (Latitud, Longitud).
- El tiempo,  $t$
- La precipitación en puntos internos,  $pre_{i,j}$

### Datos de entrada y salida

Los datos de entrada al modelo generado son sus parámetros y condiciones de borde, estos representan la energía disponible para la formación de la tormenta en el futuro.

Los datos de salida del modelo, corresponden a la precipitación en cualquier punto de cobertura de tormenta, con coordenadas (*Longitud, Latitud*) en dependencia del tiempo.

#### 4.3.4 METODO DE AJUSTE DEL MODELO

Durante el proceso de calibración, los parámetros y condiciones de borde son determinados mediante un proceso de ajuste hasta que la comparación entre el evento simulado y observado sea satisfactoria. Inicialmente se requiere ingresar valores que son difíciles de estimar a partir de los datos disponibles. Un ejemplo

de esto consiste en determinar la dirección y la velocidad de los vientos altos observando únicamente los pluviogramas registrados.

Primeramente, es necesario asumir el valor de los parámetros y condiciones de borde con el fin de comenzar el ajuste. No en todos los casos se ha realizado esta suposición inicial. En cuanto al parámetro de forma ( $n$ ) y la velocidad media de movimiento de tormenta ( $K$ ), se utiliza las Figuras 4.7 y 4.11 respectivamente. Este procedimiento intenta, de manera preliminar, expresar una cierta tendencia entre los parámetros y las condiciones de borde.

El método comprende la optimización de la dispersión entre datos observados y simulados, relativo a dos puntos característicos de los pluviogramas, el inicio y el fin del evento.

La dispersión ha sido representada mediante un valor denominado Número de Ajuste ( $N_{ajuste}$ ), expresado mediante:

$$N_{ajuste} = Cons \sum_{i=1}^{n=ne} \frac{(Error1 + Error2 + Error3)_i}{ne} \quad (4.31)$$

La ecuación (4.31), define el criterio de error utilizado en la calibración del modelo.

El criterio de error de ajuste parcial relativo al tiempo de inicio de tormenta se define como (Figura 4.16):

$$Error1 = \left| \frac{T_{iniobs_i} - T_{inisimu_i}}{DT} \right| \cdot \frac{4}{13}$$

El criterio de error de ajuste parcial relativo al tiempo de fin de tormenta se define como (Figura 4.16):

$$Error2 = \left| \frac{T_{finobs_i} - T_{finsimu_i}}{DT} \right| \cdot \frac{4}{13}$$

El criterio de error de ajuste parcial relativo a la precipitación acumulada se define como (Figura 4.16):

$$Error3 = \left| \frac{Preobs_i - Presimu_i}{PRE} \right| \cdot \frac{5}{13}$$

En donde:

$Tiniobs_i$ , representa el tiempo de inicio de lluvia observado en la estación  $i$

$Tinisimu_i$ , representa el tiempo de inicio de lluvia simulado en la estación  $i$

$Tfinobs_i$ , representa el tiempo de fin de lluvia observado en la estación  $i$

$Tfinsimu_i$ , representa el tiempo de fin de lluvia simulado en la estación  $i$

$Preobs_i$ , representa la precipitación observado en la estación  $i$

$Presimu_i$ , representa la precipitación simulado en la estación  $i$

$DT$ , es la duración de tormenta en el Centro de tormenta

$PRE$ , es la precipitación en el centro de tormenta

$ne$ , representa el número de estaciones que han registrado el evento.

$Const$ , es igual a 510, obtenido de un análisis de sensibilidad cualitativo indicado en el Anexo C.

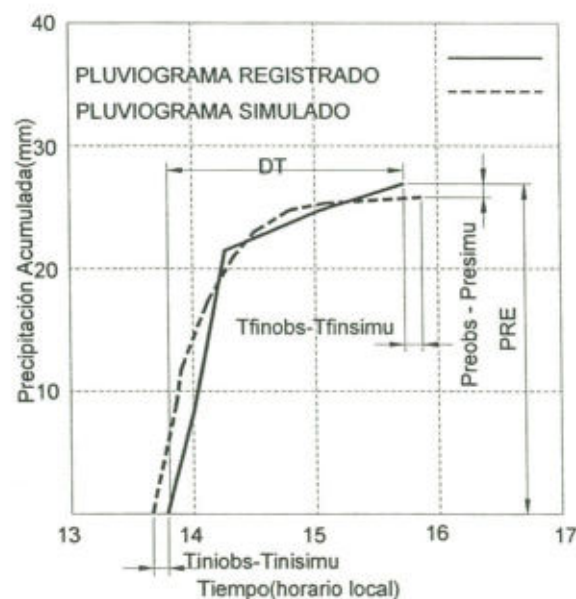

**Fig.Nº. 4.16:** Criterio de ajuste entre pluviogramas; simulado y observado, para una estación ubicada en el centro de tormenta.



*Error1*, *Error2* y *Error3*, son números adimensionales que representan un criterio de error. Los coeficientes  $4/13$  y  $5/13$ , se escogieron con el fin de dar un peso distinto a dichos números. Esto se basa en la dependencia de parámetros, variables y condiciones de borde de la precipitación, tiempo de inicio y tiempo de fin de las ecuaciones (4.10), (4.20) y (4.21). El tiempo de inicio de la ecuación (4.20) depende de 4 elementos, el tiempo de fin de la ecuación (4.21) depende también de 4 elementos y la precipitación de la ecuación (4.10) depende de 5 elementos. Es más difícil ajustar la precipitación, que los tiempos de inicio y fin de tormenta en un cierto punto. Además, se acepta como concepto de ajuste, que dentro del modelo es preferible precisar en la precipitación más que en los tiempos de inicio y fin. Recuérdese que los tiempos de inicio y fin observados se escogen de acuerdo a un criterio subjetivo que requiere la interpretación de las fajas pluviográficas. En muchos casos, el tiempo de fin de lluvia no es lo bastante claro, en cambio la precipitación en estos casos ya se ha presentado casi en su totalidad, asegurando su valor.

El número de ajuste es por tanto un número positivo adimensional, valorado en dos puntos de los pluviogramas; observado y simulado, que representa el ajuste entre ellos. Si su valor es igual a cero, el ajuste es perfecto. Si se aleja de 0, el ajuste va decreciendo.

El objetivo de la calibración es por tanto minimizar el valor del número de ajuste, mediante un arreglo o combinación de parámetros y condiciones de borde que reproduzcan el efecto (pluviogramas observados) a partir de un estímulo representado por los datos de inicio (parámetros y condiciones de borde).

Para facilitar el proceso de calibración se ha desarrollado un programa ejecutable basado en lenguaje VisualBasic, orientado a objetos, que permite no solamente el manejo de gran cantidad de información sino también la fácil presentación gráfica de los resultados. El Anexo B, presenta un resumen y un pequeño manual del usuario del programa TORMENTA.EXE

## Análisis de sensibilidad

El análisis de sensibilidad estudia los cambios en la solución óptima del modelo con relación a los cambios en los componentes del sistema<sup>24</sup>, los datos de ingreso y los parámetros que intervienen. La mayoría de los procedimientos de optimización para calibrar modelos se vincula al análisis de sensibilidad de una manera u otra<sup>24</sup>.

La sensibilidad relativa de un parámetro ha sido usada como una medida de la importancia de este parámetro para el proceso físico<sup>24</sup>.

La sensibilidad de los parámetros puede ser usada para determinar un algoritmo de optimización apropiado para obtener parámetros de modelos óptimos<sup>24</sup>.

Utilizando el programa Tormenta.exe, primeramente se ha realizado un análisis de sensibilidad inicial, valorado mediante dos criterios:

- Criterio cuantitativo: consiste en minimizar el número de ajuste
- Criterio cualitativo: consiste en dar un valor cualitativo desde el punto de vista del modelador, sobre si el ajuste es bueno (B), medianamente bueno (MB) o Deficiente (D). Depende estrictamente del punto de vista del modelador.

Para el análisis de sensibilidad se ha utilizado la tormenta del 5 de mayo de 1985, por disponer de tres estaciones mínimas de registro. Los cuadros C1.a y C1.b del Anexo C, muestran dicho análisis.

El proceso de análisis de la sensibilidad del modelo ha consistido en mantener fijos los valores de los parámetros y condiciones de borde, permitiendo que se varíe solamente uno de ellos. El número de ajuste ha sido anotado y a cada



ajuste se le ha dado el respectivo valor cualitativo, Bueno (B), Medianamente bueno (MB) y Deficiente (D).

Con ayuda de un análisis estadístico de los niveles cualitativos (B, MB, D), se ha determinado los valores de los números de ajuste que razonablemente se los puede emparejar con el criterio cualitativo. Los cuadros C2.a, C2.b y C2.c, indican los tres niveles cualitativos. Como se mencionó anteriormente para trabajar con un número de ajuste más manejable se ha utilizado la constante *Const*, esto ha permitido emparejar los valores cuantitativos con el criterio cualitativo de la siguiente manera:

| Criterio cualitativo | Criterio cuantitativo       |
|----------------------|-----------------------------|
| Bueno                | $0 \leq N_{ajuste} \leq 50$ |
| Medianamente Bueno   | $50 < N_{ajuste} \leq 80$   |
| Deficiente           | $N_{ajuste} > 80$           |

#### **Cuadro N°.4.5: Relación entre los criterios de ajuste en el modelo de lluvias**

Los cuadros C3.a y C3.b (Anexo C) presentan el ejemplo del análisis de sensibilidad de los parámetros y variables efectuado en una segunda tormenta (7 de diciembre de 1982), usando el criterio definitivo de ajuste. En estos se observa el efecto generado sobre el valor del número de ajuste, ocasionado por el cambio en el valor de los parámetros y variables.

Adicionalmente, en los mismos cuadros, con el objeto de comparar la mayor sensibilidad de un elemento respecto a otro, se ha modificado cada elemento hasta que su valor genere un número de ajuste igual al 120% del número de ajuste mínimo.

El rango de libertad de cada variable es el intervalo dentro del cual dicha variable permite que el número de ajuste varíe hasta en un 20% del número de ajuste



mínimo; *Namínimo*. Si el rango de libertad es amplio, la variable o el parámetro es poco sensible, de lo contrario se dice que la variable es muy sensible.

El cuadro 4.6, presenta en resumen el nivel de sensibilidad de los parámetros y condiciones de borde del modelo, aplicado a la tormenta del 7 de diciembre de 1982.

En resumen, el análisis de sensibilidad dentro del presente modelo permite:

- Relacionar un criterio de ajuste de tormentas desde un punto de vista cuantitativo y cualitativo.
- Las coordenadas del centro de tormenta, la duración y la precipitación como elementos de borde, son los más sensibles dentro del modelo. En otras palabras, cambios pequeños en el valor de estos, conducen a cambios grandes en el número de ajuste. Por el contrario, la distribución temporal de lluvia y las condiciones de borde de las direcciones de vientos son los elementos con poca sensibilidad dentro del modelo.

| 1                         | 2  | 3                                  | 4    | 5      | 6                 | 7         | 8         | 9    |
|---------------------------|----|------------------------------------|------|--------|-------------------|-----------|-----------|------|
| AUMENTO DE SENSIBILIDAD ↑ | Nº | ELEMENTO                           | U    | VALOR  | RANGO DE LIBERTAD | VALOR MAX | VALOR MIN | %    |
|                           | 1  | LATITUD DE CENTRO DE TORMENTA      | m    | 779000 | 615               | 779615    | 778385    | 7.1  |
|                           | 2  | DURACION DE TORMENTA(DUR)          | h    | 3.25   | 0.23              | 3.48      | 3.02      | 7.1  |
|                           | 3  | VELOCIDAD MEDIA DE MOVIMIENTO(K)   | km/h | 5.37   | 0.46              | 5.83      | 4.92      | 8.5  |
|                           | 4  | PRECIPITACION(PRE)                 | mm   | 49.50  | 5.45              | 54.95     | 44.05     | 11.0 |
|                           | 5  | PARAMETRO DE FORMA DE TORMENTA(n)  |      | 3.40   | 0.46              | 3.86      | 2.95      | 13.4 |
|                           | 6  | TIEMPO DE DESFASE(td)              | h    | 1.84   | 0.28              | 2.12      | 1.56      | 15.2 |
|                           | 7  | VELOCIDAD DE VIENTO(NORTE-SUR)     | km/h | 3.40   | 0.86              | 4.26      | 2.54      | 25.3 |
|                           | 8  | VELOCIDAD DE VIENTO(ESTE-OESTE)    | km/h | 2.14   | 0.87              | 3.01      | 1.27      | 40.5 |
|                           | 9  | PARAMETRO TEMPORAL DE TORMENTA(K1) |      | 0.43   | 0.25              | 0.68      | 0.18      | 58.7 |

Nota: La Columna 9 =Columna 6 / Columna 5 en porcentaje

Nota: La columna 6 se refiere al incremento y decremento que soporta el valor sin que el número de ajuste sobrepase un 20% del número de ajuste mínimo.

Nota: El valor de la columna (9), relativo a la latitud del centro de tormenta se ha calculado con un valor de 8700 en columna (5) debido a colocar una constante igual a 770300 para encerrar los lugares posibles de ubicación del centro de tormenta

**Cuadro N°.4.6: Resultados del nivel de sensibilidad de los elementos del modelo propuesto aplicado a la tormenta del 07-diciembre-1982.**

El cálculo efectuado en esta tormenta se realiza, para todas y cada una de las 15 tormentas escogidas utilizando el programa Tormenta.exe. El reporte gráfico de la corrida se presenta en el Anexo D.

Se enfatiza en el hecho de la subjetividad en el uso del modelo, se minimiza al introducir el número de ajuste.

Del análisis de las 15 tormentas, se ha generado el cuadro H1; presentado en el Anexo H; Cuadros y Figuras, en el cual se resumen los parámetros y condiciones de borde de cada tormenta, con su respectivo número de ajuste, menor a 80.

Por último, se recuerda que, la precipitación y duración de un punto ubicado en el centro de tormenta *CT* se refiere a una condición de borde sin viento. Dentro del modelo, esta condición se la ha mantenido como aquella condición de borde potencialmente factible de suceder y que representa la combinación de fenómenos meteorológicos en el instante de inicio de la tormenta.

El centro de tormenta es en todos los casos dinámico, y después de su recorrido, existe un punto o un área, en donde se presentó la precipitación máxima acumulada y no necesariamente la mayor duración. Este punto debe encontrarse cerca al sitio de la denominada estación principal de registro (Quito-Observatorio) y es el **centro definitivo de tormenta**. A este punto se lo ha denominado *CTc*.

La precipitación en este punto se la denominará *PREc*, su Duración *DTc* y Intensidad *Ic*; las coordenadas de este punto se los puede obtener utilizando el modelo de lluvias dentro de un Sistema de Información Geográfico, por ello, para cada una de las 15 tormentas seleccionadas se ha realizado la simulación en un SIG (ArcView) a través de programación Avenue, obteniéndose así los centros con máxima precipitación.

En el cuadro H2 se presenta por fecha de tormenta, las coordenadas, la precipitación total y la duración del centro definitivo de tormenta. Estos datos representan ya los resultados de incluir dentro del modelo el efecto de los vientos de altura.

Con la información indicada en el Cuadro H1 y H2, se realizó la correlación entre distintos elementos del modelo. Los resultados encontrados se resumen en las Figuras 4.17 a 4.22.



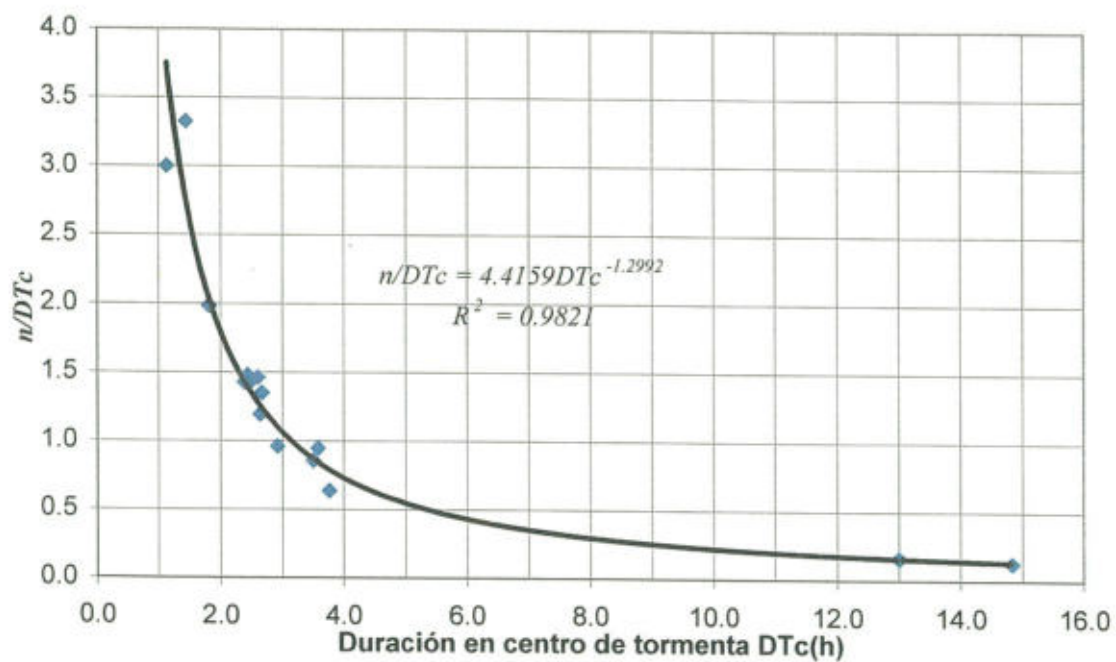

**Fig.Nº. 4.17:** Curva ajustada que relaciona  $n/DTc$  y la duración en el centro de tormenta  $DTc$ .

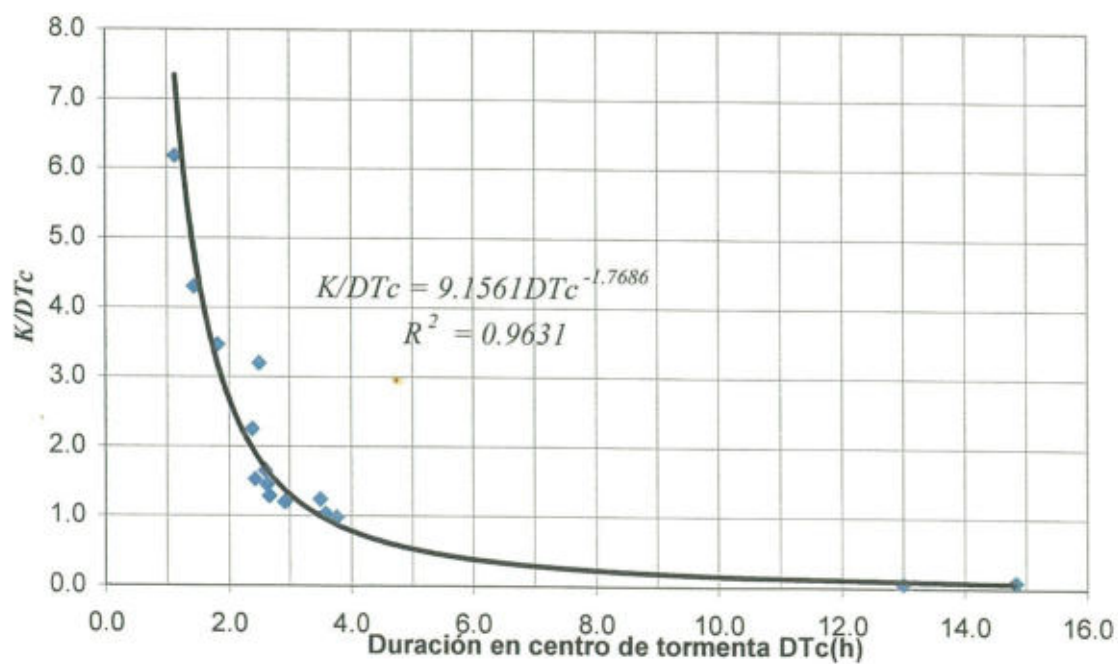

**Fig.Nº. 4.18:** Curva ajustada que relaciona la  $k/DTc$  con la duración en el centro de tormenta  $DTc$ .

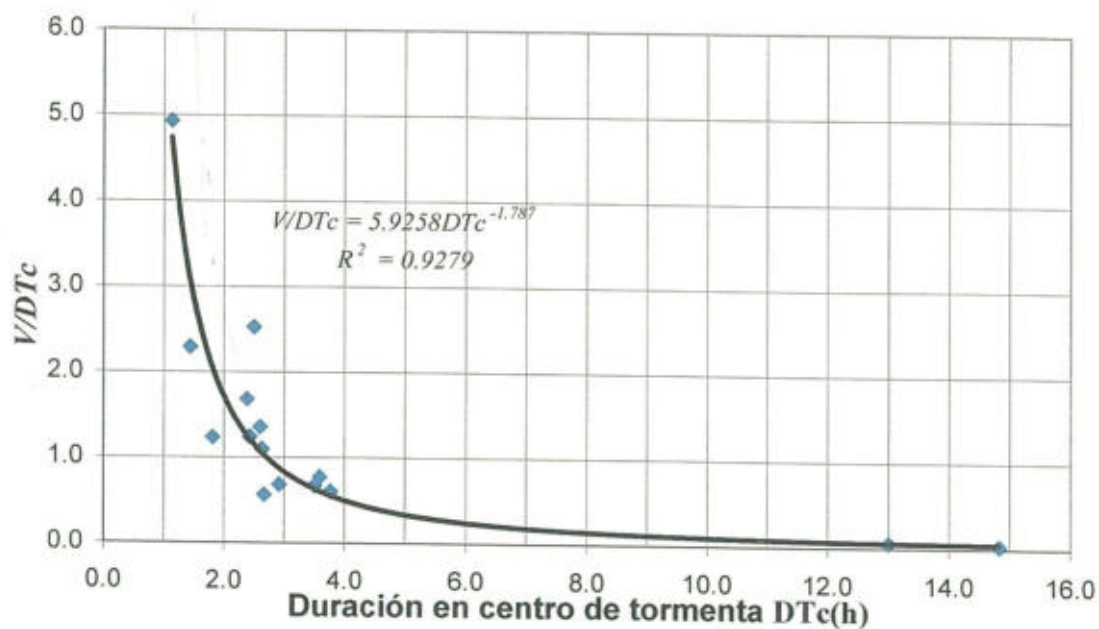

**Fig.N°. 4.19:** Curva ajustada que relaciona  $V/DT_c$  con la duración en el centro de tormenta  $DT_c$ .

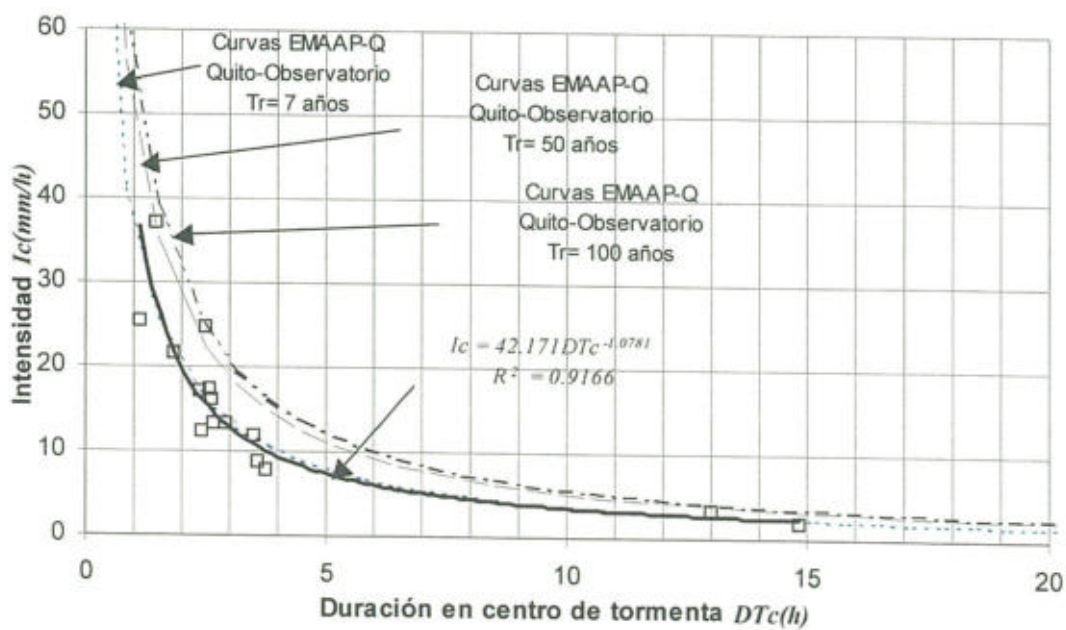

**Fig.N°. 4.20:** Curva de ajuste entre la Intensidad en el centro de tormenta  $I_c$  en relación a su duración  $DT_c$ .

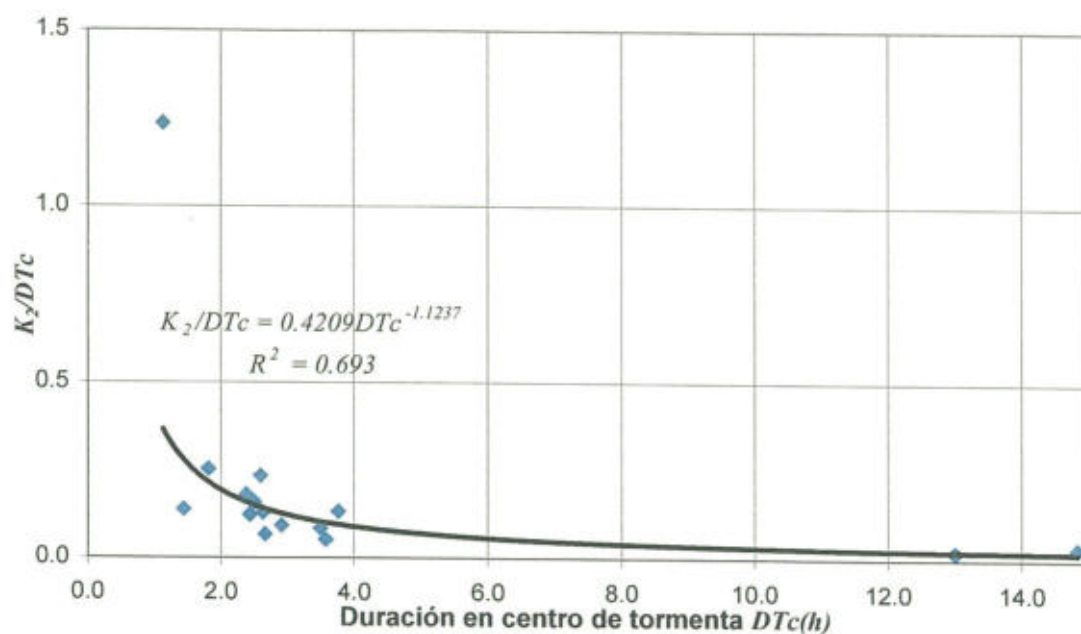

**Fig.Nº. 4.21:** Curva de ajuste entre la  $K_2/DT_c$  con relación a la Duración en el centro de tormenta  $DT_c$ .

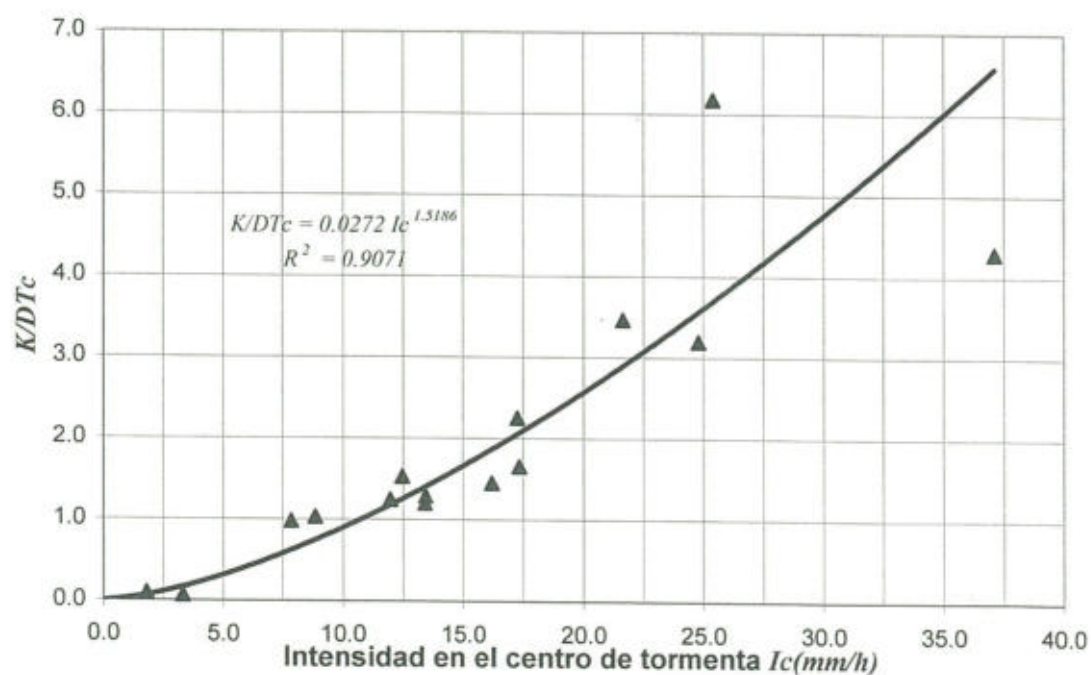

**Fig.Nº. 4.22:** Curva de ajuste entre la  $K/DT_c$  con relación a la intensidad en el centro de tormenta  $I_c$ .



Las curvas propuestas observan grados significativos de correlación entre las variables indicadas, en función de los datos propios de las 15 tormentas estudiadas.

En base al método desarrollado, tomando en cuenta las tormentas máximas, que prácticamente han abarcado 8 años, se propone la Figura 4.20, junto con las curvas Intensidad-Duración-Frecuencia utilizadas por la Empresa Metropolitana de Agua Potable y Alcantarillado de Quito. EMAAP-Quito, para la estación Quito Observatorio. La curva media corresponde a un período de retorno de 7 años, no obstante, las curvas envolventes máximas tienen períodos de retorno de 50 y 100 años respectivamente. Este resultado, sugiere el nivel de frecuencia de las curvas encontradas.

La validación consiste en ajustar una o varias tormentas adicionales, partiendo de las curvas obtenidas en las Figuras 4.17 a 4.22. De este modo se consigue que los resultados de dicho ajuste se adapten razonablemente a las envolventes de las figuras anteriormente indicadas. Este procedimiento se aplica luego de que las primeras tormentas presentaron tendencias de tipo exponencial. Por lo tanto el proceso de calibración y validación se ha llevado en conjunto a partir de la tormenta 7, donde ya se observaron las tendencias dominantes.

La disminución del área influenciada por la lluvia tiene relación con su duración como se sustenta en base a la distribución espacial de las 15 tormentas obtenidas en Arcview. Este análisis para cada tormenta por separado se presenta en el Anexo E, que contiene el reporte del cálculo de la disminución de la precipitación media con el área de la tormenta.

También en el Anexo E se presentan el análisis para una condición media, y comprende el cálculo de la disminución de la precipitación media con el aumento del área mediante un ajuste estadístico; las curvas obtenidas tienen un coeficiente de correlación de 0.81 para todos los porcentajes de disminución de la precipitación. El cuadro 4.7 y la Figura 4.23 presentan lo indicado.

| % de precipitación<br>media/precipitación<br>máxima | AREA DE TORMETA(km2)          |       |       |       |       |       |       | Coeficiente<br>de<br>correlación |
|-----------------------------------------------------|-------------------------------|-------|-------|-------|-------|-------|-------|----------------------------------|
|                                                     | DURACION DE TORMENTA EN HORAS |       |       |       |       |       |       |                                  |
|                                                     | 1                             | 2     | 3     | 6     | 9     | 12    | 15    |                                  |
| 100                                                 | 0.0                           | 0.0   | 0.0   | 0.0   | 0.0   | 0.0   | 0.0   |                                  |
| 95                                                  | 1.3                           | 2.5   | 3.8   | 7.6   | 11.4  | 15.2  | 19.0  | 0.81                             |
| 90                                                  | 2.9                           | 5.8   | 8.7   | 17.3  | 26.0  | 34.7  | 43.3  | 0.81                             |
| 85                                                  | 5.0                           | 9.9   | 14.9  | 29.7  | 44.6  | 59.5  | 74.4  | 0.81                             |
| 80                                                  | 7.3                           | 14.6  | 22.0  | 43.9  | 65.9  | 87.9  | 109.9 | 0.80                             |
| 75                                                  | 10.6                          | 21.2  | 31.9  | 63.7  | 95.6  | 127.5 | 159.4 | 0.81                             |
| 70                                                  | 14.1                          | 28.2  | 42.3  | 84.6  | 126.8 | 169.1 | 211.4 | 0.81                             |
| 65                                                  | 18.3                          | 36.7  | 55.0  | 110.0 | 165.0 | 220.0 | 275.0 | 0.81                             |
| 60                                                  | 23.3                          | 46.6  | 69.9  | 139.8 | 209.7 | 279.6 | 349.5 | 0.81                             |
| 55                                                  | 29.0                          | 58.0  | 87.1  | 174.1 | 261.2 | 348.3 | 435.4 | 0.81                             |
| 50                                                  | 35.6                          | 71.2  | 106.8 | 213.7 | 320.5 | 427.3 | 534.2 | 0.81                             |
| 45                                                  | 42.9                          | 85.9  | 128.8 | 257.6 | 386.4 | 515.3 | 644.1 | 0.81                             |
| 40                                                  | 51.7                          | 103.3 | 155.0 | 309.9 | 464.9 | 619.8 | 774.8 | 0.81                             |

**Cuadro N°.4.7:** Datos de disminución de la precipitación media con el aumento del área de tormenta ( $\text{km}^2$ ) para 15 tormentas.

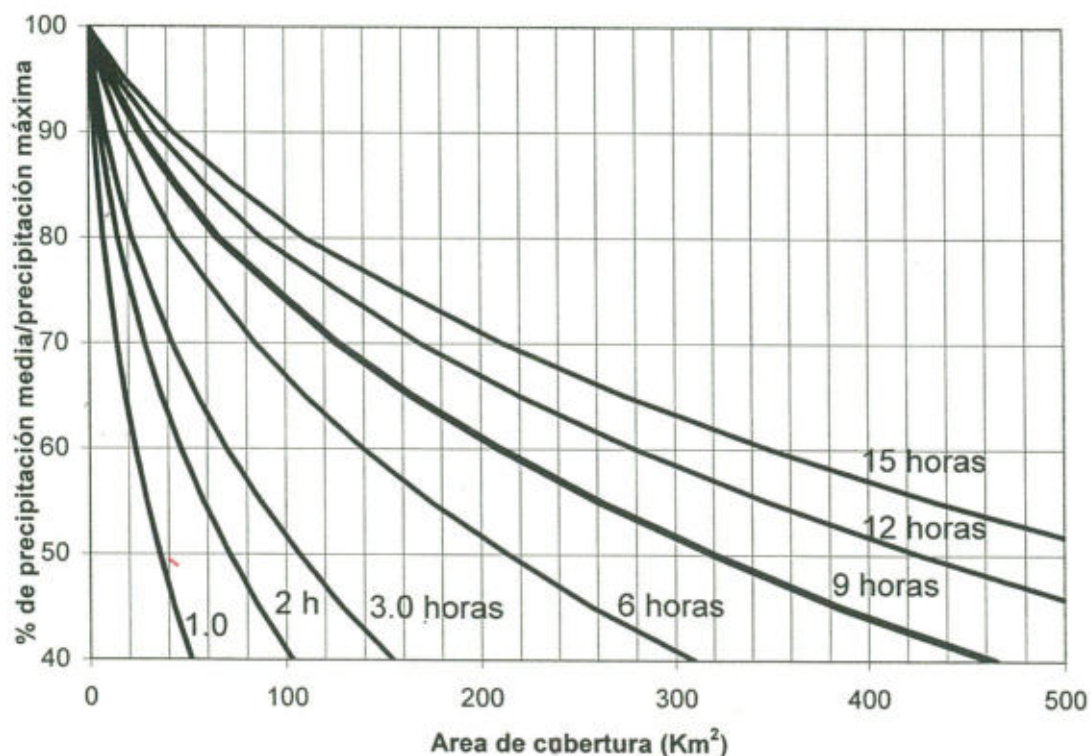

**Fig.N°.4.23:** Curvas de la disminución de la precipitación media con relación al aumento del área obtenidas de cuadro 4.7 para 15 tormentas unicelulares en Quito.



## **CAPITULO 5**

### **APLICACIÓN CON HIDROGRAMAS DE CRECIDA**

#### **5.1 MODELO DE ESCURRIMIENTO Y APLICACION SIG**

##### **INTRODUCCIÓN**

El modelo descrito en el capítulo anterior simula la distribución tanto espacial como temporal de una célula de tormenta. Las tormentas utilizadas para la calibración del modelo cubren extensas áreas, no obstante las máximas intensidades ocurren sobre áreas relativamente pequeñas; menores a 40 km<sup>2</sup>. (Ver Figura 4.23 para 90% de precipitación media sobre precipitación máxima)

Es razonable esperar que en áreas mayores las tormentas resulten de eventos compuestos por varias células que ocurren simultáneamente y que por ende su modelación reviste mayor complejidad.

La limitación propia de los modelos precipitación – escurrimiento de parámetros agrupados, de incluir explícitamente en sus relaciones matemáticas, el efecto del decrecimiento de la precipitación del centro a su periferia, es una justificación válida para desarrollar nuevos métodos que permitan cubrir esta deficiencia.

Como se explicó anteriormente, en la aplicación se utiliza el SIG (ArcView), que permite incorporar el lenguaje Avenue, que es potente para el manejo de información espacial. Mientras que el lenguaje VisualBasic permitió enlazar los procesos generados en Avenue.

##### **TIPOS DE MODELOS PRECIPITACIÓN-ESCURRIMIENTO**

Existen varios métodos y modelos para simular el fenómeno precipitación – escurrimiento, como se precisa en el Capítulo 1. Desde el método racional, hasta



los modelos de parámetros distribuidos, que considera los principales procesos del ciclo del agua en una cuenca hidrográfica y requieren volúmenes importantes de información espacial y temporal para su aplicación <sup>9</sup>.

Los fenómenos analizados a continuación son los denominados de evento, es decir que ocurren de manera independiente en el tiempo; se desarrollan en periodos de corta duración<sup>25</sup>, desde horas hasta pocos días. Estos fenómenos son aptos para incorporar parámetros distribuidos y permiten discretizar el fenómeno en intervalos de tiempo del orden de minutos.

#### **5.1.1 DESCRIPCION DEL MODELO PRECIPITACIÓN ESCURRIMIENTO UTILIZADO**

Los modelos distribuidos incorporan las características geográficas del área de estudio (cuenca hidrográfica) en formato **raster**. Para ello, se divide la cuenca en celdas cuadradas. A cada celda se le asocia valores que caracterizan variables, parámetros o características geográficas, como son la cobertura vegetal (constante) y otros, variables en el tiempo, como son: infiltración, precipitación, volumen almacenado, etc.

Como datos de entrada, estos modelos requieren principalmente la siguiente información:

- Características geográficas del área de estudio, incluyendo datos sobre el tipo y uso del suelo.
- Características de las tormentas, ya sean registradas o de diseño, que tomen en cuenta lluvias antecedentes al evento de simulación, y distribuciones espaciales y temporales.

Con estos datos y con ayuda de herramientas SIG se genera información distribuida de tipo raster, como:

- Coeficiente de Manning.
- Tiempo de concentración para cada celda
- Pendiente del terreno
- Características del uso del tipo y uso del suelo

Los modelos distribuidos permiten incorporar datos, de forma diferenciada, sobre el escurrimiento en laderas y el flujo en cauces.

#### **5.1.1.1 CONSIDERACIONES SOBRE EL FLUJO EN LADERA**

Durante un evento de lluvia, el agua inicialmente es interceptada por la vegetación, luego se infiltra continuamente saturando poco a poco los niveles más altos de la superficie del suelo. Los excesos de lluvia se retienen en la superficie del terreno, desde donde se infiltra o evapora. Una vez que la lluvia completa los requerimientos iniciales de infiltración y almacenamiento en depresiones naturales, el exceso de precipitación escurre superficialmente en láminas, y luego formando pequeños riachuelos. Este escurrimiento es precisamente el flujo en laderas, que se dirige a los cauces secundarios, canales pequeños y cauces naturales.

La formación del flujo en ladera se evalúa en cada celda, reproduciendo en ella, los procesos interceptación, infiltración y generación del escurrimiento superficial, que varían en el tiempo. La integración del escurrimiento formado en cada celda con las demás, requiere de información geográfica que defina la dirección hacia los cauces principales.

## **A) ANÁLISIS DEL FENÓMENO PRECIPITACIÓN-ESCURRIMIENTO EN UNA CELDA O PARCELA**

### **PERDIDAS**

Las pérdidas constituyen la parte de la precipitación que no llega a formar escurrimiento superficial. La conforman retención de la humedad por la vegetación, acumulación de agua en depresiones, infiltración y evaporación.

Durante un evento de tormenta, las pérdidas por evaporación y traspiración son despreciables. La retención de la humedad por la vegetación varía entre 2 y 10 mm, (Andrade, 1993)<sup>2</sup>.

Algunos valores de pérdidas por almacenamiento en depresiones durante lluvias intensas fueron reportados por Hicks (1994) así: 5.08 mm para arenas, 3.8 mm para tierra negra y 2.5 mm para arcillas. Tholin y Kiefer (1960) han asumido valores de 6.3 mm en áreas urbanas permeables y 1.6 mm para zonas pavimentadas<sup>26</sup>. Se debe tomar en cuenta también que el máximo volumen de almacenamiento superficial en una cuenca se obtiene si esta se encuentra orientada horizontalmente. De aquí la importancia de tomar en cuenta la pendiente media de la cuenca.

En el presente modelo, para representar las abstracciones iniciales; es decir la retención por la vegetación y el almacenamiento en depresiones, se utiliza un valor correspondiente al 20% de la capacidad de almacenamiento máxima. Este porcentaje es sugerido dentro del método empleado por el Servicio de Conservación de Suelos de los Estados Unidos (SCS, 1968)<sup>2</sup>.

### **TIEMPO DE CONCENTRACIÓN**

El tiempo de concentración se define al tiempo requerido por el escurrimiento para viajar de la parte hidráulicamente más distante del área de interés a un



punto de referencia aguas abajo<sup>25</sup>. En este caso toda el área de la celda aporta simultáneamente a la formación del caudal. Ver Figura 5.1.

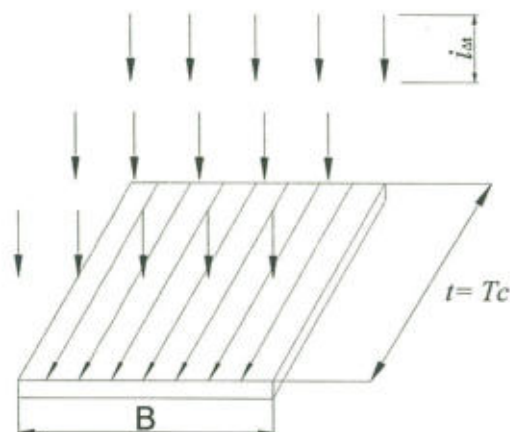

**Fig.Nº.5.1:** Esquema del tiempo de concentración en una parcela de ladera.

Existen muchos métodos para calcular el tiempo de concentración, algunos de ellos son obtenidos para el movimiento del agua en laderas, otros principalmente para cauces y algunos para flujos en cauces y laderas. Interesa en este caso utilizar una relación que refleje el movimiento del agua en ladera.

Si el área de estudio se considera igual al área de la celda utilizada en la información tipo celda, se puede utilizar la ecuación dada por Agiralioglu y Singh (1981) presentada por Singh(1986)<sup>25</sup>:

$$T_c = 2.782 \cdot \frac{L^{0.6} \cdot n^{0.6}}{I^{0.4} S^{0.3}} \quad (5.1)$$

Donde;  $T_c$ , es el tiempo de concentración en minutos

$L$ , es la longitud del plano en m

$n$ , es el coeficiente de Manning

$S$ , es la pendiente del terreno

$I$ , es la intensidad de lluvia en cm/hora

El rango de aplicación de esta ecuación es para una longitud de 15 a 30 m.

Otra ecuación fácil de utilizar es la propuesta por Hathaway (1945) y presentada por Djokic(1991)<sup>14</sup>:

$$T_c = 0.827 \cdot \frac{L^{0.7} \cdot n^{0.467}}{\Delta H^{0.234}} \quad (5.2)$$

Donde;  $L$  es la longitud del trayecto mas largo en pies

$\Delta H$  es el cambio en la elevación a lo largo del trayecto

$n$  es el coeficiente de rugosidad de Manning

Se debe recordar que  $L$ , representa la longitud de recorrido del agua; es decir, su trayectoria inclinada.

La ecuación (5.2), aplicada para una celda o parcela cuadrada con lado  $\Delta x$  y presentada en unidades internacionales, toma la siguiente forma:

$$T_c = 1.438 \cdot n^{0.467} \cdot L^{0.7} \cdot (L^2 - \Delta x^2)^{-0.117} \quad (5.3)$$

Donde:  $L$  es la longitud inclinada del trayecto mas largo en metros

$\Delta x$  es el ancho de la celda o parcela de análisis en metros

$n$  es el coeficiente de rugosidad de Manning

La ecuación (5.1) , que incluye la variable intensidad de lluvia puede también ser utilizada en el análisis. Se escoge la ecuación (5.3) por ser la más sencilla y también observando que los resultados del tiempo de concentración presentados en la Figura H.4; del anexo de Cuadros y Figuras, son aceptables.

## COEFICIENTE DE MANNING PARA FLUJO EN LADERAS

El coeficiente de rugosidad de Manning para distintas superficies de terreno, puede ser determinado a través de información sobre el tipo y uso del suelo. El cuadro 5.1, utilizado en el Stanford Watershed Model, por Crawford y Linsley (1966) y presentado por Viessman(1977)<sup>26</sup> es adopta en el modelo presente.

| Cobertura                       | Coeficiente de Manning; n, para flujo superficial |
|---------------------------------|---------------------------------------------------|
| Asfalto liso                    | 0.012                                             |
| Pavimento de concreto           | 0.014                                             |
| Arcilla compacta                | 0.03                                              |
| Césped Ligero                   | 0.2                                               |
| Césped Denso                    | 0.35                                              |
| Matorrales densos y bosque bajo | 0.4                                               |

**Cuadro N°.5.1:** Valores típicos del coeficiente de Manning para flujo superficial en laderas (Tomado de Viessman et al. 1977)

Otra información útil se incluye en el cuadro 5.2, propuesta por Engman (1983) y presentada por Arnold (1985)<sup>3</sup>; el rango de valores es más amplio.

| Cobertura                                | Rango de valores de Manning |
|------------------------------------------|-----------------------------|
| Barbechos; terrenos de labor sin siembra | 0.008-0.012                 |
| Cultivos convencionales, no residuales   | 0.06 - 0.12                 |
| Cultivos convencionales, residuales      | 0.16 - 0.22                 |
| Arados no residuales                     | 0.06 - 0.12                 |
| Arados residuales                        | 0.10 - 0.16                 |
| Bosques(20% de cobertura)                | 0.6                         |
| Pastos cortos, praderas                  | 0.10 - 0.20                 |
| Pastos densos                            | 0.17 - 0.30                 |
| Pastos tropicales                        | 0.30 - 0.48                 |

**Cuadro N°.5.2:** Valores típicos del coeficiente de Manning para flujo superficial en laderas (Tomado de SWRRB Simulator for Water Resources in Rural Basins, 1985).



## CAUDAL GENERADO EN UNA CELDA

Un modelo distribuido asociado a un evento de lluvia es simulado asumiendo intervalos iguales discretos. Por tanto, el hidrograma de crecida de una celda debe ser también generado en base a los intervalos de discretización.

El tiempo de concentración de cada celda no es necesariamente el mismo, por tanto, comparando con el intervalo de discretización de la lluvia, estos tiempos pueden ser menores, iguales o mayores. De allí la necesidad de analizar cada caso por separado.

Caso a.- Si la duración de la lluvia  $\Delta t$  es mayor que el tiempo de concentración  $T_c$  de la parcela de análisis.

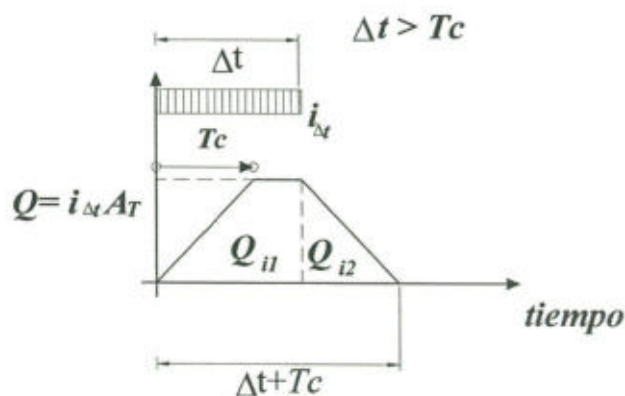

*Nota: Area que aporta al escurrimiento ( $A_r$ )*

**Fig.N°.5.2:** Hidrograma de una celda con intervalo de tiempo de análisis mayor a su tiempo de concentración  $\Delta t > T_c$

Se observa en la Figura 5.2 que el hidrograma representado tiene una duración máxima igual a  $2\Delta t$ ; por tanto el caudal medio generado en los dos intervalos de tiempo es:

$$\bar{Q}_{i1} = \frac{P \cdot A_r}{\Delta t^2} \left( \Delta t - \frac{T_c}{2} \right); \text{ para el primer intervalo} \quad (5.4)$$

$$\bar{Q}_{i2} = \frac{P \cdot A_T \cdot T_c}{2 \cdot \Delta t^2}; \text{ para el segundo intervalo} \quad (5.5)$$

$$P = i_{\Delta t} \cdot \Delta t \quad (5.6)$$

En donde:  $A_T$ , es el área de la celda o parcela de análisis

Para la programación es necesario separar dos niveles de memoria por cada celda y por cada intervalo de tiempo  $\Delta t$ .

Si la duración de la lluvia es igual a  $n\Delta t$ , como se muestra en la Figura 5.3, el modelo de cálculo del caudal igualmente requiere 2 niveles de memoria: el primero, para calcular el primer tramo del primer hidrograma, y el segundo, para acumular el segundo tramo del primer hidrograma, junto con el primer tramo del segundo hidrograma.

Los dos hidrogramas de la Figura 5.3, son equivalentes y por lo tanto se demuestra la validez de los criterios de cálculo.

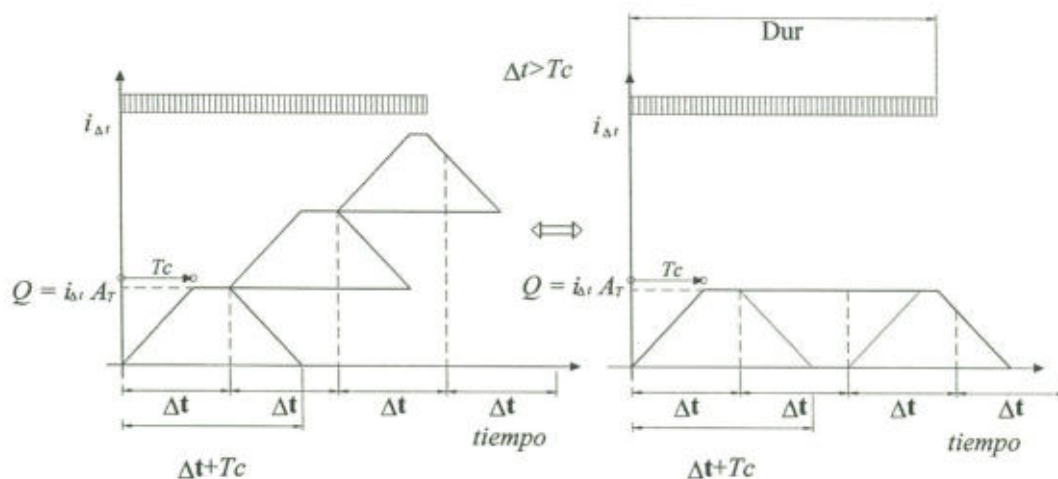

**Fig. N°.5.3:** Esquema de modelo de generación de caudales para una lluvia de duración igual a  $2.8\Delta t$  y  $t_c < \Delta t$ .

Caso b.- El intervalo de tiempo  $\Delta t$  correspondiente a la duración de la lluvia efectiva es igual al tiempo de concentración de la parcela de análisis.

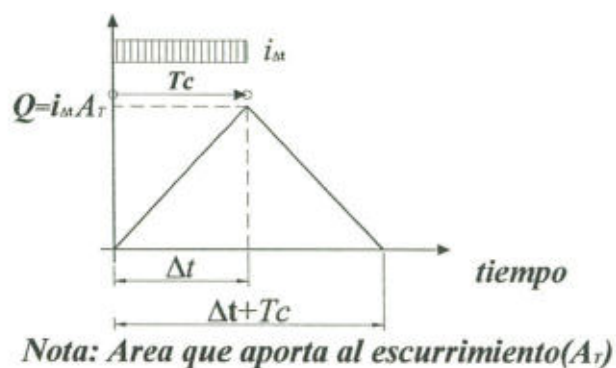

**Fig.N°.5.4:** Hidrograma de una celda con intervalo de tiempo de análisis igual a su tiempo de concentración,  $\Delta t = T_c$ .

Este caso dispuesto en la Figura 5.4, requiere también de las ecuaciones (5.4), (5.5) y (5.6) para el cálculo del caudal, e igualmente requiere 2 niveles de memoria para la programación.

Caso c.- El intervalo de tiempo  $\Delta t$  de la lluvia efectiva es menor al tiempo de concentración de la celda o parcela (Figura 5.5).

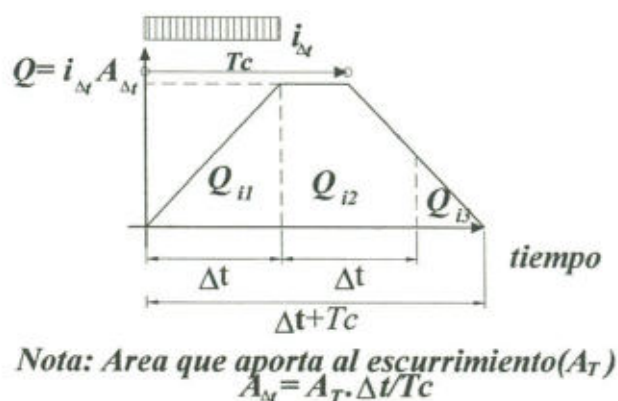

**Fig.N°.5.5:** Hidrograma de una celda con intervalo de tiempo de análisis menor a su tiempo de concentración,  $\Delta t < T_c$ .



Este hidrograma tiene un tiempo base mínimo de  $2\Delta t$ ; los caudales medios correspondientes para los tres intervalos son:

$$\bar{Q}_{i1} = \frac{P \cdot A_r}{2 \cdot T_c}; \text{ para el primer intervalo} \quad (5.7)$$

$$\bar{Q}_{i2} = \frac{P \cdot A_r}{\Delta t^2 \cdot T_c} \left( \Delta t^2 - \frac{(2\Delta t - T_c)^2}{2} \right); \text{ para el segundo intervalo} \quad (5.8)$$

$$\bar{Q}_{i3} = \frac{P \cdot A_r}{2\Delta t^2 \cdot T_c} (T_c - \Delta t)^2; \text{ para el tercer intervalo} \quad (5.9)$$

En consecuencia, la programación exige disponer de 3 niveles de memoria para cada celda y por cada intervalo de tiempo  $\Delta t$ .

En la Figura 5.6 se observa que para una duración de lluvia de varios  $\Delta t$ : el primer nivel de memoria durante la programación debería almacenar el valor del primer caudal medio, la segunda memoria almacena el valor del primer caudal medio del segundo intervalo sumado al segundo caudal medio del primer intervalo, la tercera memoria acumula el valor del primer caudal medio del tercer intervalo, junto con el segundo caudal medio del segundo intervalo y el tercer caudal medio del primer intervalo.

Adicionalmente se observa en la Figura 5.6.a, los hidrogramas superpuestos resultantes de una lluvia de intensidad  $i_{\Delta t}$ , por cada intervalo de tiempo  $\Delta t$  durante un tiempo continuo igual a  $Dur$  sobre una celda de tiempo de concentración igual a  $T_c$ . La suma de estos hidrogramas es presentado en la Figura 5.6.b, donde se observa que el resultado es equivalente a considerar una lluvia de intensidad  $i_{\Delta t}$  durante un tiempo igual a  $Dur$  sobre una celda de igual tiempo de concentración. Esto demuestra que la metodología adoptada, permite el cálculo de caudales generados en cada celda de manera independiente al intervalo de tiempo  $\Delta t$  considerado.

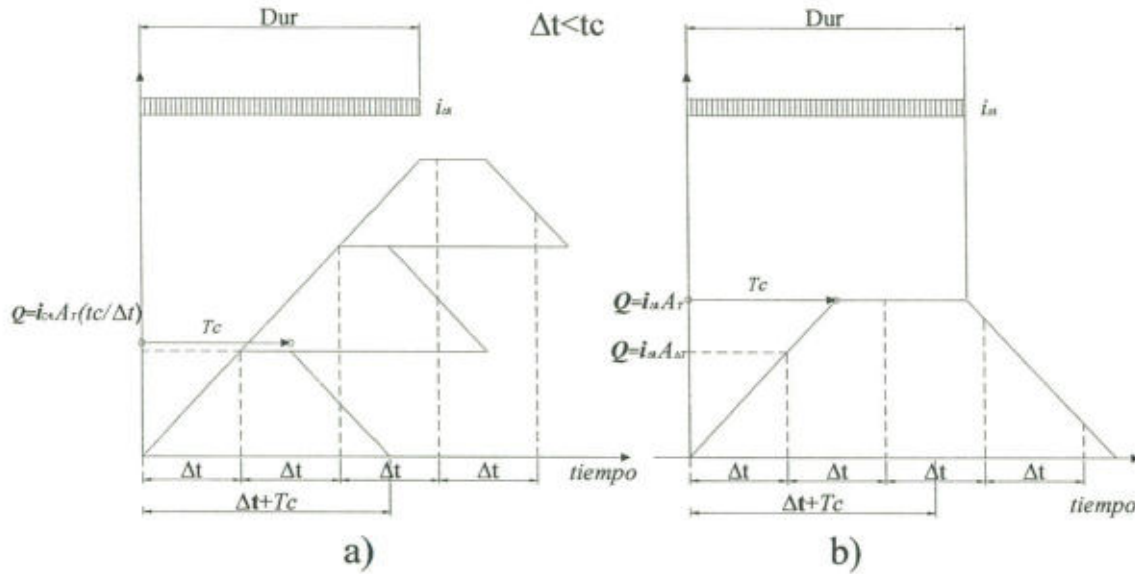

**Fig.N° 5.6:** Esquema de modelo de generación de caudales para una lluvia de duración igual a  $2.8\Delta t$  y  $t_c > \Delta t$ .

El procedimiento empleado en el cálculo de los caudales medios de acuerdo a la Figura 5.6, se puede adoptar para el caso en que el tiempo de concentración sea igual no a tres intervalos sino a  $n_m$  intervalos. En consecuencia, las ecuaciones resultantes son:

$$\bar{Q}_{i1} = \frac{P \cdot A_r}{2 \cdot T_c}, \text{ para el primer intervalo} \quad (5.10)$$

$$\bar{Q}_{i2} = \frac{P \cdot A_r}{T_c}, \text{ para el segundo intervalo} \quad (5.11)$$

.

.

.

$$\bar{Q}_{i(n_m-1)} = \frac{P \cdot A_r}{\Delta t^2 \cdot T_c} \left( \Delta t^2 - \frac{(n_m \cdot \Delta t - T_c)^2}{2} \right), \text{ para el (enésimo -1) intervalo} \quad (5.12)$$

$$\bar{Q}_{in_m} = \frac{P \cdot A_r}{2 \Delta t^2 \cdot T_c} (T_c - (n_m - 1) \Delta t)^2; \text{ para el enésimo intervalo} \quad (5.13)$$

En este caso, el proceso de programación requiere  $n_m$  memorias que guarden el valor del caudal medio para cada una de las celdas en que se ha dividido una cuenca de estudio. Si se limita el valor de  $n_m$  a 14, el proceso de cálculo de los caudales de crecida para una cuenca dividida con una malla de 107 filas por 299 columnas el tiempo de máquina, no excede de 10 minutos.

El hecho de disminuir el valor de  $n_m$  memorias no afecta significativamente al cálculo de la crecida con este modelo de escurrimiento.

## B) ANÁLISIS DEL ESCURRIMIENTO DE CELDA EN CELDA

El modelo en ladera se resume en encontrar la trayectoria o recorrido del flujo desde una celda de interés hasta un punto de salida, que generalmente corresponde a la sección de interés de una cuenca, para la cual se requiere la determinación de los caudales máximos. La Figura 5.7 muestra la trayectoria óptima del agua, es decir con la menor longitud de recorrido posible, que requiere que la pendiente del terreno sea la mayor.

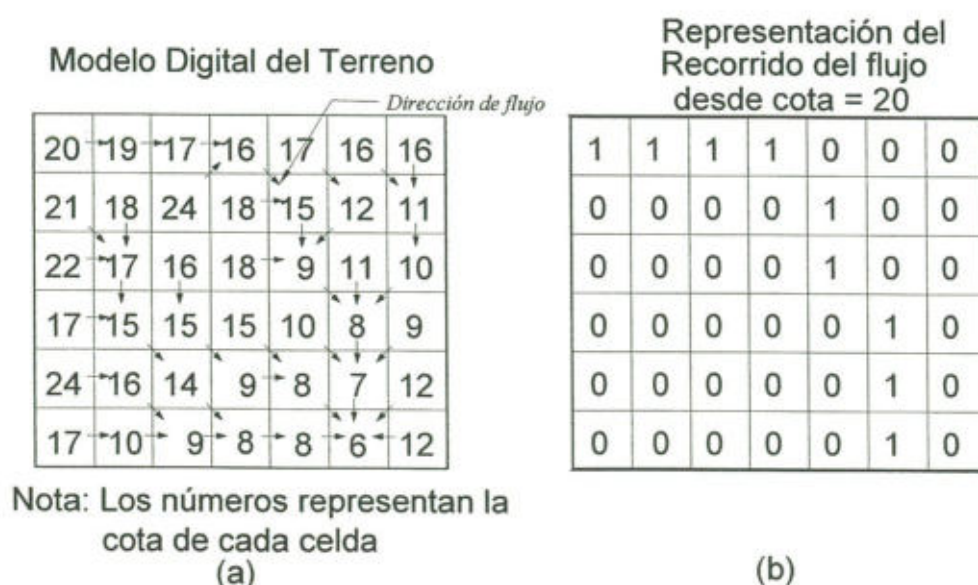

**Fig.Nº.5.7:** Trayectoria del agua asegurando un recorrido óptimo (Adaptado de: Manejo de SIG con aplicaciones a Recursos Hídricos. Mafla<sup>21</sup>, 1997).



Este esquema es llevado a un lenguaje de programación mediante un algoritmo que utiliza lazos o cadenas, en función de las coordenadas geográficas como son: latitud, longitud y cota de la celda de análisis y las colindantes.

#### 5.1.1.2 CONSIDERACIONES SOBRE EL FLUJO EN LOS CAUCES

La modelación del flujo en cauces o canales demanda de gran volumen de información, para representar el efecto de incremento de velocidad, por la significativa acumulación de volúmenes de agua.

La acumulación de agua en el cauce, como el tránsito de crecidas son importantes temas, que son tratados también en el estudio de flujo no permanente y no uniformemente distribuido en canales sujetos a gravedad, y en particular sobre la celeridad de la onda de crecida y su consiguiente deformación o atenuación.

La atenuación puede ser entendida como resultado de la resistencia que ejerce el cauce al movimiento o puede ser resultado del almacenamiento del agua en las irregularidades del cauce<sup>28</sup>.

El tratamiento del problema aplicando aproximaciones hidrológicas o hidráulicas, requiere de información sobre las características del cauce: forma, rugosidad y la interrelación entre caudales de entrada y salida del volumen de control considerado, que generalmente no está disponible.

Como variante se propone la siguiente aproximación consistente en:

- Considerar a todas las celdas al interior de la cuenca como unidades en ladera.
- Considerar una velocidad de movimiento del flujo en ladera como una constante en todas y cada una de las celdas.

Beltrán (1997)<sup>7</sup>, presenta un ejemplo en la Qda. Rumipamba (Noroccidente de la Ciudad de Quito), donde indica la atenuación y el retardo del caudal pico en una crecida, efecto de la disminución de la velocidad en ladera en el modelo de escurrimiento de tipo distribuido (Figura 5.8).

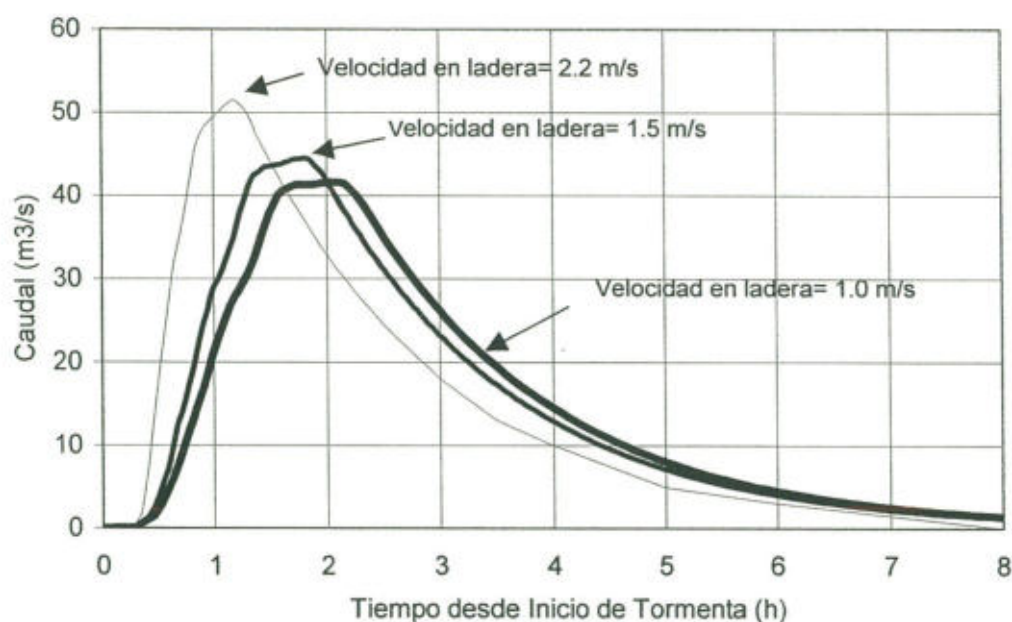

**Fig.Nº.5.8:** Hidrograma de Crecida Simulado en Qda. Rumipamba.  $P=56.4\text{mm}$ .  $DT=12\text{h}$  (Tomado de Modelación matemática de tormentas unicelulares Beltrán. 1997).

Este modelo se lo asocia a una banda transportadora, que al desplazarse en una dirección recibe lateralmente distintas cantidades de material a lo largo de toda su longitud. Si se disminuye la velocidad de movimiento de la banda, la entrega del material se realiza en menor tiempo pero en mayor volumen por unidad de tiempo, debido que la entrega lateral no ha cambiado.

Por supuesto, un modelo precipitación - escurrimiento debe considerar las propiedades del cauce en el cálculo del hidrograma de crecida, pero el método propuesto genera un hidrograma muy similar una vez que sea calibrado con la crecida observada.

## 5.2 CUENCA DE ESTUDIO

Se ha escogido como área de aplicación a la cuenca de drenaje de la Qda. Rumipamba, por disponer de la correspondiente información topográfica y las cartas de uso del suelo. Se conoce que importantes estudios sobre la respuesta a fenómenos meteorológicos se han realizados para esta microcuenca y otras de la ladera Occidental del Pichincha<sup>24</sup>

Las características físicogeográficas de esta cuenca se obtuvieron utilizando el SIG Arcview. El cuadro 5.3 incluye esta información.

|                                   |                      |
|-----------------------------------|----------------------|
| Area                              | 6.52 km <sup>2</sup> |
| Pendiente media cuenca:           | 31.4%                |
| Altitud máxima:                   | 4400 msnm            |
| Altitud mínima(punto de análisis) | 3025 msnm            |
| Longitud de cauce principal       | 6.17 km              |
| Diferencia de altura              | 975 m                |
| Pendiente media del cauce         | 15.8%                |
| Número de curva CN(II)            | 82                   |
| Tiempo de concentración(Kirpich)  | 31 minutos           |

### **Cuadro N°.5.3: Características físicas de la micro-cuenca Rumipamba.**

La Figura H.1 del anexo H (Cuadros y Figuras) refiere la cuenca obtenida en Arcview-3D Analyst en una presentación estilo TIN (Formato especial de representación de superficies usando triángulos contiguos).

La misma figura anterior se presenta en la Figura H.2 pero en formato grid. Se ilustra en un recuadro una ampliación de un área con valores que representan la cota de cada celda.

La Figura H.3 presenta la distribución del uso del suelo en la misma cuenca.



### 5.3 GENERACIÓN DE HIDROGRAMAS

En este numeral se presentan y describen los resultados de la corrida del modelo de lluvias presentado y su aplicación a modelos precipitación – escurrimiento.

A continuación se describe el modelo de escurrimiento presentado en lenguaje Visual Basic, denominado MISION.EXE.

- Lenguaje utilizado: VisualBasic
- Requerimiento de Hardware: Pentium IV, capacidad mínima de memoria Ram 256MB, Velocidad 2.4 Gh.
- Enlaza el modelo de lluvias TORMENTA.EXE como un sub-proceso
- El número de celdas de la cuenca Rumipamba es de 16300, con lados de 20m x 20m.
- Enlaza los archivos generados por ArcView, que representan la cota del terreno y genera un archivo GRADIENTE.DAT, que contiene la pendiente para todas y cada una de las celdas.
- Lee el Archivo GRADIENTE.DAT y generado el archivo DIRFLUJO.DAT que representa las direcciones del flujo en cada celda, analizando las 8 posibles direcciones del flujo en cada celda.
- Enlaza los archivos generados por ArcView, que representan el tiempo de concentración de cada celda.
- El número de memorias utilizadas para el cálculo de los hidrogramas en cada celda es igual a 14.
- La acumulación del caudal se realiza de acuerdo a un modelo de tipo banda, descrito en numeral 5.1.1.2
- Los resultados obtenidos se gravan en el archivo CAUDAL.DAT

El diagrama de flujo del modelo de escurrimiento se indica en la Figura 5.9

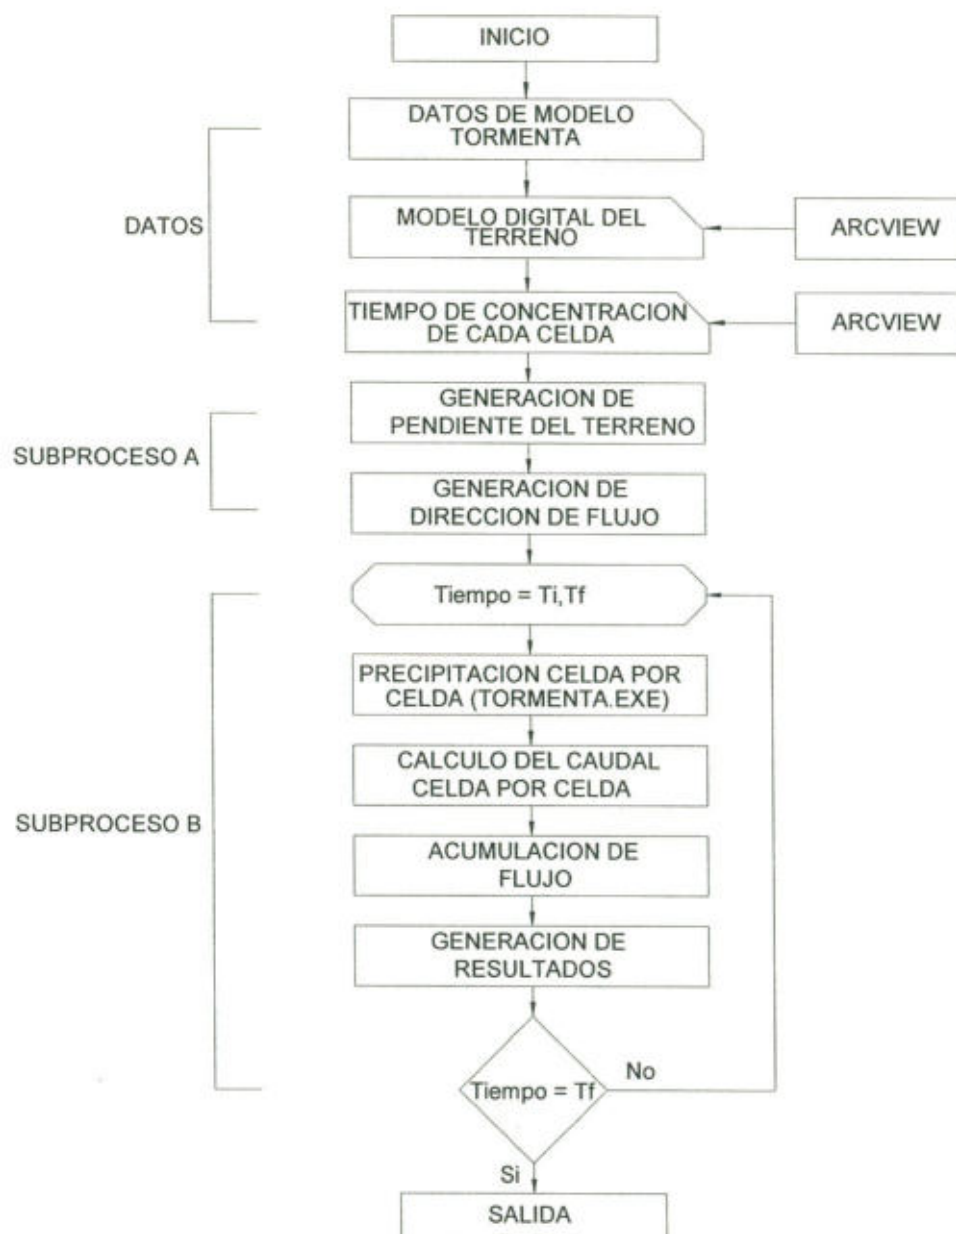

**Fig.N°. 5.9:** Diagrama de flujo del modelo de escurrimiento utilizado.

## PROCESO DE AJUSTE

Se realiza una comparación a modo de ajuste entre un hidrograma generado por el modelo computacional HIDRO1 y el hidrograma generado por el modelo propuesto (MISION).

Si bien este no es un proceso de ajuste bajo un concepto matemático, puesto que para ello se requiere disponer de hidrogramas observados, el modelo es válido como una primera aproximación para presentar las aplicaciones del modelo de lluvias generado. La aplicación para un proyecto demanda siempre disponer de un hidrograma observado.

Como se mencionó en las consideraciones sobre el flujo en cauces (numeral 5.1.1.2), la selección de la velocidad de escurrimiento en ladera es fundamental, para ello se requiere aplicar un proceso de ajuste para esta variable.

La metodología consiste en igualar en lo posible la forma de la presentación en el tiempo del hidrograma de crecida, la precipitación total y la precipitación efectiva entre los resultados de los dos modelos.

Se ha utilizado los datos del cuadro 5.3, como datos de partida del modelo computacional HIDRO1. Los resultados de dicha modelación constan en el Anexo G.

Se ha obtenido los gráficos indicados en las Figuras 5.10 y 5.11 con una velocidad de escurrimiento en ladera igual a 1.15 m/s. El criterio de comparación ha consistido en obtener:

- Igual tiempo base entre hidrogramas
- Igual caudal pico entre hidrogramas
- Igual cantidad de precipitación efectiva entre ambos modelos

Los datos comparativos se indican en los cuadros 5.4.a y 5.4.b



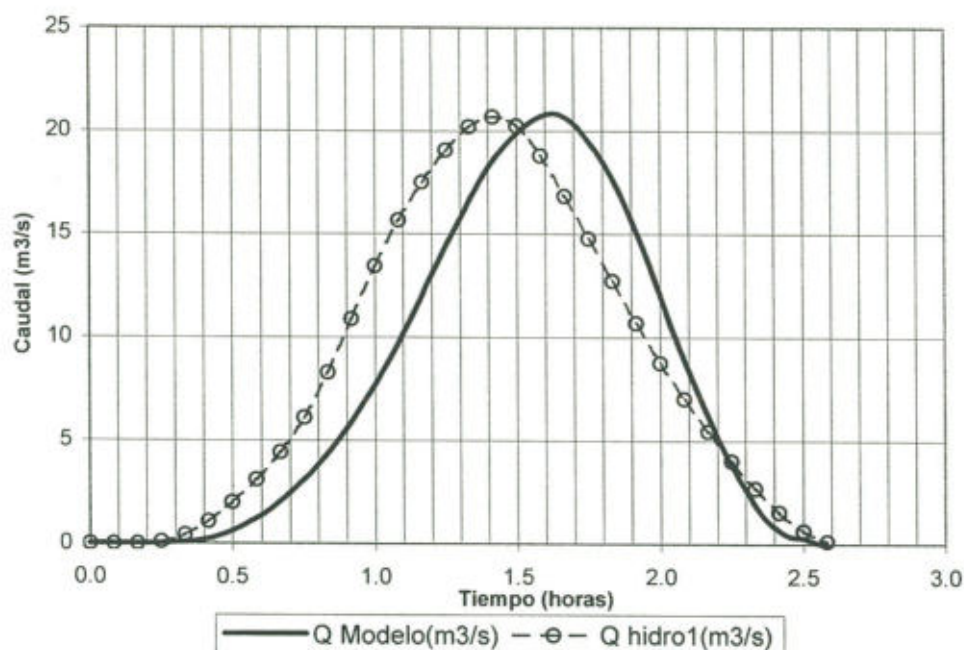

**Fig.N°. 5.10:** Ajuste entre Hidrogramas obtenidos por modelo HIDRO1 y modelo MISIÓN, Velocidad en ladera igual a 1.15 m/s.

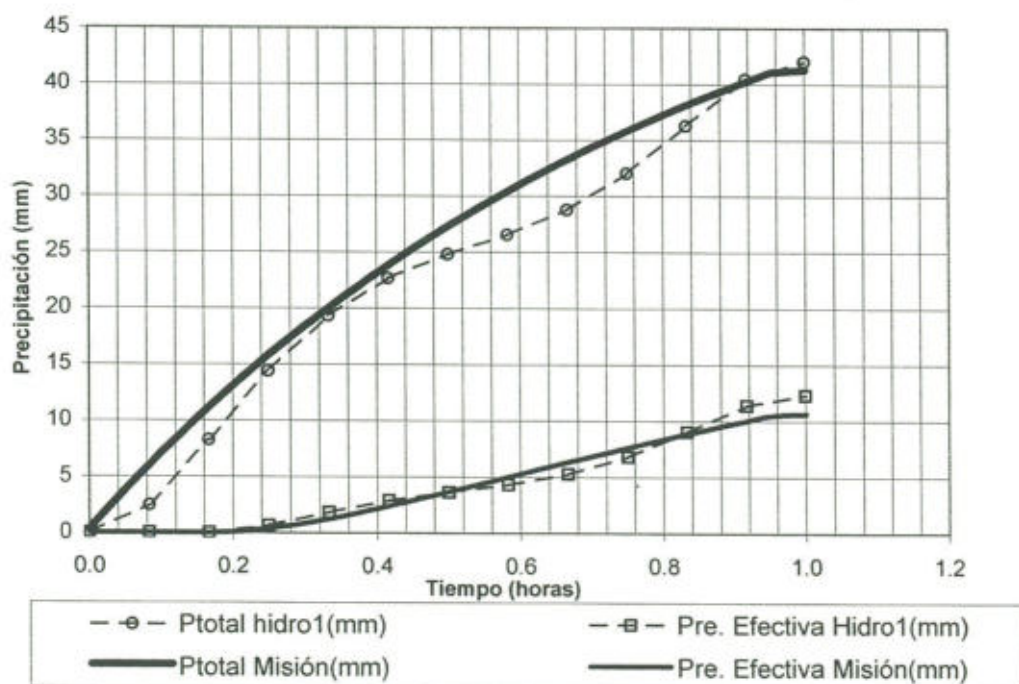

**Fig.N°. 5.11:** Ajuste de la Precipitación total y efectiva entre modelos HIDRO1 y MISIÓN, Velocidad en ladera igual a 1.15 m/s.

|                                             |                       |                   |
|---------------------------------------------|-----------------------|-------------------|
| <b>PRECIPITACIÓN</b>                        |                       |                   |
| Precipitación                               | 42                    | mm                |
| Duración                                    | 1                     | hora              |
| Velocidad media k                           | 100                   | Km/h              |
| Parámetro de forma n                        | 0.5                   |                   |
| Coeficiente de patrón temporal              | 2                     |                   |
| Tiempo de desfase td                        | 0                     | hora              |
| Velocidad en X y Y                          | 0                     | Km/h              |
| <b>Centro de tormenta</b>                   |                       |                   |
| Longitud                                    | 774162                |                   |
| Latitud                                     | 9979460               |                   |
| Intervalo de análisis                       | 0.29                  | min               |
| Distribución Temporal                       | Igual en toda el área |                   |
| Distribución Espacial                       | Uniforme              |                   |
| <b>ESCURRIMIENTO</b>                        |                       |                   |
| Abstracciones Iniciales                     | 20                    | %                 |
| Número de curva                             | 82                    |                   |
| Velocidad de escurrimiento en ladera        | 1.15                  | m/s               |
| Número de celdas analizadas(20 x 20 metros) | 16300                 |                   |
| <b>RESULTADOS</b>                           |                       |                   |
| Q pico                                      | 20.81                 | M <sup>3</sup> /s |
| Tiempo Pico                                 | 1.60                  | hora              |
| Volumen                                     | 73276                 | M <sup>3</sup>    |
| Tiempo de máquina empleado                  | 9                     | min               |

**Cuadro N°.5.4.a: Datos de entrada y salida del modelo MISION**

|                            |                       |                   |
|----------------------------|-----------------------|-------------------|
| PRECIPITACIÓN              | 42                    | Mm                |
| Duración                   | 1                     | Hora              |
| Area                       | 6.52                  | Km <sup>2</sup>   |
| Número de curva            | 82                    |                   |
| Número de curva de Huff    | 50% primer cuartil    |                   |
| Longitud del cauce         | 6.24                  | Km                |
| Pendiente cuenca           | 31.4                  | %                 |
| Abstracciones Iniciales    | 20                    | %                 |
| Distribución Temporal      | Igual en toda el área |                   |
| Distribución Espacial      | Uniforme              |                   |
| RESULTADOS                 |                       |                   |
| Q pico                     | 20.68                 | M <sup>3</sup> /s |
| Tiempo Pico                | 1.420                 | Hora              |
| Volumen                    | 80152                 | M <sup>3</sup>    |
| Tiempo de máquina empleado | 2                     | S                 |

**Cuadro N°.5.4.b: Datos de entrada y salida del modelo HIDRO1.**

Se precisa que el hecho de considerar un valor de la velocidad media de movimiento  $K=100$  km/h, es un artificio en la aplicación del modelo para simular la simultaneidad en tiempo de la tormenta sobre toda el área de la cuenca, Además, el valor del parámetro de forma  $n = 0.5$ , se lo utiliza para conseguir que la precipitación en todos los puntos dentro de la cuenca sea igual a la precipitación en el centro de tormenta. Con estos dos valores se logra simular la uniformidad de la tormenta en tiempo y espacio dentro el modelo de lluvias propuesto.

### 5.3.1 APLICACIÓN CON DISTINTOS ESCENARIOS DE FORMACIÓN DE LA LLUVIA

Los escenarios propuestos a continuación consideran la variación de las distintas variables y parámetros, en ciertos rangos aceptables, dentro del modelo de tormenta con el fin de comprender el correspondiente efecto en los hidrogramas de salida resultantes.

Las tormentas sintéticas en adelante se llaman tormentas parametrizadas para la Ciudad de Quito. Se las denomina de esta manera porque se adaptan a las ecuaciones definitivas ajustadas dentro de la calibración del modelo de lluvias propuesto (Figura 4.17 a 4.22). Así, sus parámetros y variables satisfacen las siguientes ecuaciones:

$$n = 4.4159 \cdot DT_c^{-0.2992} \quad (5.16)$$

$$K = 9.1561 \cdot DT_c^{-0.7686} \quad (5.17)$$

$$V = 5.9258 \cdot DT_c^{-0.787} \quad (5.18)$$

$$Ic = 42.171 \cdot DT_c^{-1.0781} \quad (5.19)$$

$$K_2 = 0.4209 \cdot DT_c^{-0.1237} \quad (5.20)$$



En donde;

$DT_c$  es la duración en el centro de tormenta en horas,

$n$  es el parámetro de forma de la tormenta,

$K$  es la velocidad media de movimiento de tormenta (km/h),

$V$  es la velocidad de vientos altos (km/h),

$I_c$  es la intensidad de lluvia en el centro de tormenta (mm/h), y

$K_2$  es el parámetro temporal de la tormenta.

Se plantea tres escenarios de aplicación del modelo de lluvias, dentro de las múltiples posibilidades. El de mayor importancia toma en cuenta el aumento de la duración de la tormenta en su centro.

#### **ESCENARIO A; VARIACIÓN DE LA DURACIÓN DE TORMENTA**

Este escenario consiste en una lluvia sujeta a una distribución espacial y temporal sobre toda el área, considera el efecto de los vientos altos que inciden en la dirección de la tormenta. El azimut de la dirección de la tormenta se ha igualado a  $60^\circ$  (N $60^\circ$ E) en función de que esta dirección es la de mayor frecuencia entre las tormentas analizadas.

En cuanto al tiempo de desfase se ha utilizado la ecuación (5.21) obtenida correlacionando el tiempo de desfase y la hora de inicio de la tormenta en su centro ( $r = 0.79$ ), referida en el cuadro H.1 (Anexo H, Cuadros y Figuras)

$$td = \frac{19.6 - HI}{3.11} \quad (5.21)$$

En donde:

$td$  es el tiempo de desfase en horas

$HI$  es el tiempo de inicio en el centro de tormenta; este valor se lo ha tomado igual a 15.6 horas, por ser el valor promedio.

En cuanto al fenómeno de escurrimiento se utilizó las siguientes aproximaciones:

- Las pérdidas por infiltración toma en cuenta el método del USCS.
- Abstracciones iniciales igual al 20% de la capacidad de almacenamiento máxima.
- Velocidad de flujo en ladera igual a 1.15 m/s

El cuadro 5.5 presenta el resumen de los escenarios utilizados, modificando la duración de tormenta.

### ESCENARIO: **A** **AUMENTO DE LA DURACION DE LLUVIA**

MICROCUENCA:

Rumipamba

Area: 6.52 km<sup>2</sup>

| ESCENARIO                                             | Símbolo | A1      | A2      | A3      | A4      | A5      | A6      | A7      | A8      | Unidad         |
|-------------------------------------------------------|---------|---------|---------|---------|---------|---------|---------|---------|---------|----------------|
| <b>PRECIPITACION</b>                                  |         |         |         |         |         |         |         |         |         |                |
| <b>CENTRO DE TORMENTA (CT); CONDICIONES DE BORDE</b>  |         |         |         |         |         |         |         |         |         |                |
| Latitud del centro de tormenta(CT)                    |         | 774000  | 774000  | 774000  | 773950  | 773350  | 772800  | 772700  | 772600  |                |
| Longitud del centro de tormenta(CT)                   |         | 9979500 | 9979500 | 9979500 | 9979500 | 9979500 | 9979500 | 9979500 | 9979500 |                |
| Duración inicial                                      | DT      | 1.6     | 2.7     | 4.34    | 6.0     | 9.0     | 12.0    | 15.0    | 18.0    | hora           |
| Precipitación inicial                                 | PRE     | 41.1    | 45.5    | 46.5    | 45.8    | 44.4    | 42.7    | 41.5    | 40.4    | mm             |
| Azimut de dirección de vientos                        | Azimut  | 90.00   | 90.00   | 90.00   | 90.00   | 90.00   | 90.00   | 90.00   | 90.00   |                |
| Velocidad de vientos en longitud                      | Vx      | 4.55    | 3.43    | 2.50    | 1.99    | 1.45    | 1.15    | 0.97    | 0.84    | km/h           |
| Velocidad de vientos en latitud                       | Vy      | 0.00    | 0.00    | 0.00    | 0.00    | 0.00    | 0.00    | 0.00    | 0.00    | km/h           |
| <b>CENTRO DE TORMENTA (CTc) A NIVEL DE SUPERFICIE</b> |         |         |         |         |         |         |         |         |         |                |
| Duración en centro de tormenta                        | DTc     | 1.4     | 2       | 3       | 4       | 6       | 8       | 10      | 12      | hora           |
| Coefficiente de forma de tormenta                     | n       | 3.99    | 3.59    | 3.18    | 2.92    | 2.58    | 2.37    | 2.22    | 2.10    |                |
| Velocidad media de movimiento                         | K       | 7.07    | 5.37    | 3.94    | 3.15    | 2.31    | 1.85    | 1.56    | 1.36    | km/h           |
| Velocidad de vientos                                  | V       | 4.55    | 3.43    | 2.50    | 1.99    | 1.45    | 1.15    | 0.97    | 0.84    | km/h           |
| Intensidad                                            | Ic      | 29.34   | 19.97   | 12.90   | 9.46    | 6.11    | 4.48    | 3.52    | 2.89    | mm/h           |
| Precipitación                                         | PREc    | 41.08   | 39.95   | 38.70   | 37.84   | 36.66   | 35.85   | 35.23   | 34.73   | mm             |
| Radio máximo                                          | Rmax    | 11.31   | 14.30   | 17.08   | 18.93   | 20.89   | 22.22   | 23.40   | 24.41   | km             |
| Longitud de recorrido                                 | Lrec    | 7.28    | 9.14    | 10.83   | 11.94   | 13.08   | 13.84   | 14.52   | 15.09   | km             |
| Hora de inicio de tormenta                            | HI      | 15.60   | 15.60   | 15.60   | 15.60   | 15.60   | 15.60   | 15.60   | 15.60   | hora           |
| Tiempo de desfase                                     | Td      | 1.29    | 1.29    | 1.29    | 1.29    | 1.29    | 1.29    | 1.29    | 1.29    | hora           |
| Coefficiente de patrón temporal                       | k2      | 0.40    | 0.39    | 0.37    | 0.35    | 0.34    | 0.33    | 0.32    | 0.31    |                |
| Velocidad de inicio Vi                                | Vi      | 8.79    | 11.12   | 13.28   | 14.72   | 16.25   | 17.28   | 18.19   | 18.98   | km/h           |
| Velocidad de fin Vf                                   | Vf      | -36.04  | -10.41  | -5.59   | -4.02   | -2.69   | -2.07   | -1.71   | -1.46   | km/h           |
| Latitud del centro de tormenta(CTc)                   |         | 774000  | 774000  | 774000  | 774000  | 774000  | 774000  | 774000  | 774000  |                |
| Longitud del centro de tormenta(CTc)                  |         | 9979500 | 9979500 | 9979500 | 9979500 | 9979500 | 9979500 | 9979500 | 9979500 |                |
| <b>ESCURRIMIENTO</b>                                  |         |         |         |         |         |         |         |         |         |                |
| Abstracciones iniciales                               |         | 11.15   | 11.15   | 11.15   | 11.15   | 11.15   | 11.15   | 11.15   | 11.15   |                |
| Número de curva                                       | C/N     | 82.00   | 82.00   | 82.00   | 82.00   | 82.00   | 82.00   | 82.00   | 82.00   | mm/h           |
| <b>RESULTADOS</b>                                     |         |         |         |         |         |         |         |         |         |                |
| Caudal Pico                                           | Qp      | 9.37    | 10.58   | 9.85    | 8.58    | 6.79    | 5.11    | 4.08    | 3.37    | m3/s           |
| Volumen de crecida                                    | Vol     | 23561   | 35410   | 42412   | 44776   | 47065   | 45334   | 44591   | 43290   | m <sup>3</sup> |
| Precipitación Efectiva                                | Pefec   | 3.61    | 5.43    | 6.50    | 6.87    | 7.22    | 6.95    | 6.84    | 6.64    | mm             |
| Hora Pico                                             | Hp      | 1.28    | 1.44    | 1.63    | 1.83    | 2.20    | 2.57    | 2.91    | 3.23    | h              |
| Hora de inicio de escurrimiento                       | He      | 0.52    | 0.50    | 0.54    | 0.60    | 0.80    | 1.02    | 1.17    | 1.31    | h              |
| Tiempo Relativo al Pico                               | Tp      | 0.76    | 0.94    | 1.09    | 1.23    | 1.40    | 1.55    | 1.74    | 1.92    | h              |

**Cuadro N°.5.5:** Presentación de los resultados en escenario 1, resultantes de cambiar la duración de la tormenta en su centro (DTc).



Para simular este escenario se determinó inicialmente las coordenadas del centro de tormenta *CT*, el cual al moverse, precipitará una lámina de lluvia *PREc*, sobre el centroide de la cuenca Rumipamba (coordenadas 774000, 9979500). Con este fin se utilizó el programa *TORMENTA.exe*, simulando cada escenario hasta conseguir el objetivo, posteriormente se utilizó el programa *MISION.exe*. Los resultados de cada uno de los escenarios modelados constan en el **Anexo F, Reportes de escenarios de modelación con programa MISION.exe**, la Figura 5.12 resume los resultados de los hidrogramas obtenidos para cada uno de los escenarios.

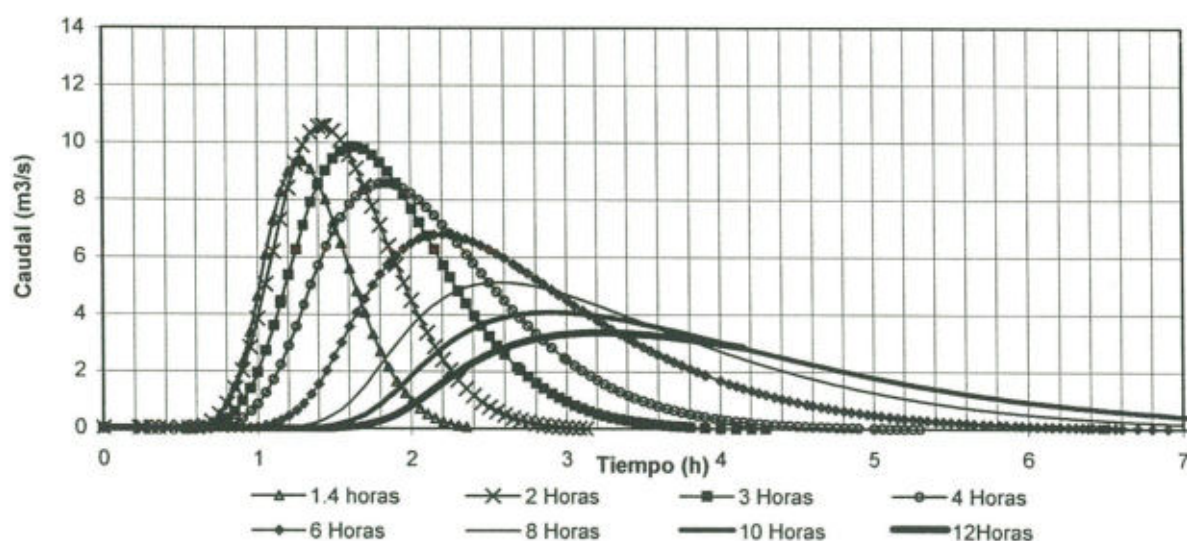

**Fig.Nº.5.12:** Hidrogramas de crecida para la microcuenca de la Qda. Rumipamba considerando el aumento de la duración de lluvia en su centro; Programa MISION.

#### ESCENARIO B; VARIACIÓN DEL TIEMPO DE DESFASE

Se utilizó el escenario A2 anterior y se realizó variaciones en el tiempo de desfase (*td*).

Los valores tomados en consideración son:

- Escenario B1, Tiempo de desfase igual a 1.29 horas



- Escenario B2 ,Tiempo de desfase igual a 0 horas
- Escenario B3, Tiempo de desfase igual a 2.7 horas

Los resultados de la simulación se presentan en la Figura 5.13

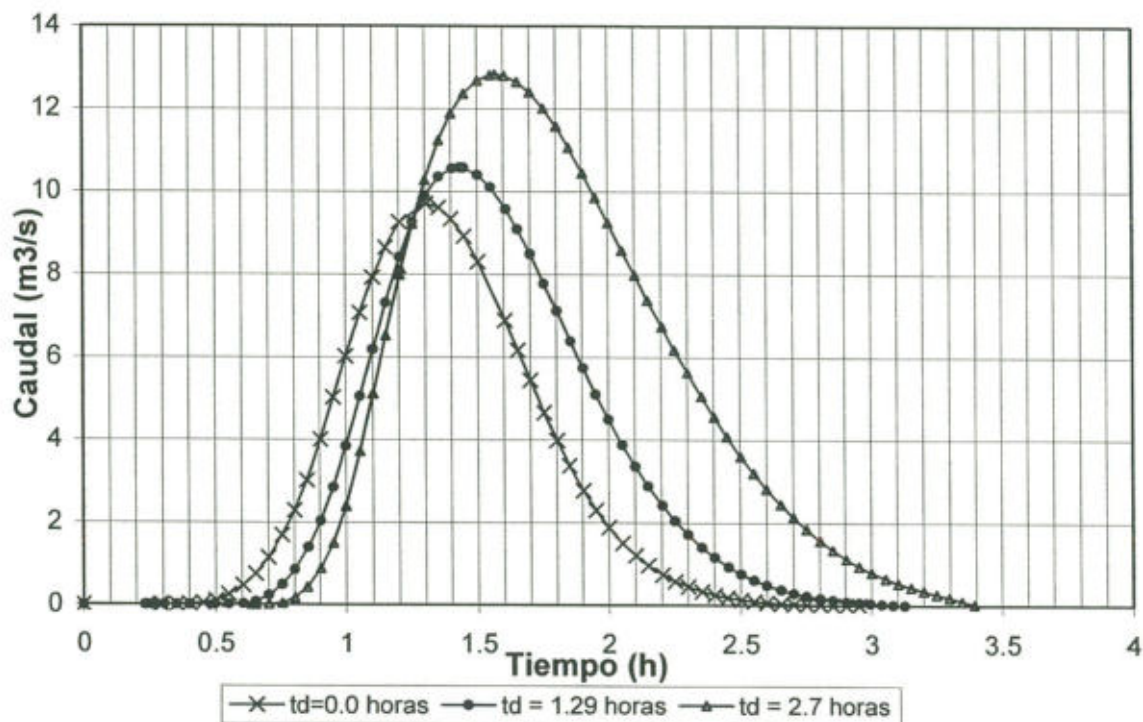

**Fig.Nº.5.13:** Hidrogramas de crecida considerando el cambio del tiempo de desfase de lluvias en la Qda Rumipamba; Programa MISION.

El cambio en el tiempo de desfase, produce cambios en la lámina de precipitación tanto en el tiempo como en el espacio, lo que, por supuesto, produce cambios en los respectivos hidrogramas de crecida. Adicionalmente se observa que el cambio en el valor del tiempo de desfase, genera el traslado del centro de tormenta definitivo  $CT_c$ , produciendo variaciones en la precipitación acumulada y la duración en su centro. Los resultados de estos escenarios se indican en el Anexo F.

### ESCENARIO C; VARIACIÓN DEL PERIODO DE RETORNO DE LLUVIA

Se utiliza el escenario A2 anterior y se realiza una modificación en el período de retorno. Basado en el gráfico de la Figura 4.13, se observa que la curva de ajuste tiene un período de retorno de 7 años. Por lo que, se puede utilizar la curva empleada por la Empresa Metropolitana de Alcantarillado y Agua Potable de Quito, para generar las precipitaciones correspondientes para otros períodos de retorno: 25 y 50 años.

Los valores tomados en consideración son:

- Escenario C1, Período de retorno de 7 años
- Escenario C2, Período de retorno de 25 años
- Escenario C3, Período de retorno de 50 años

Los resultados de esta simulación se presentan en la Figura 5.14

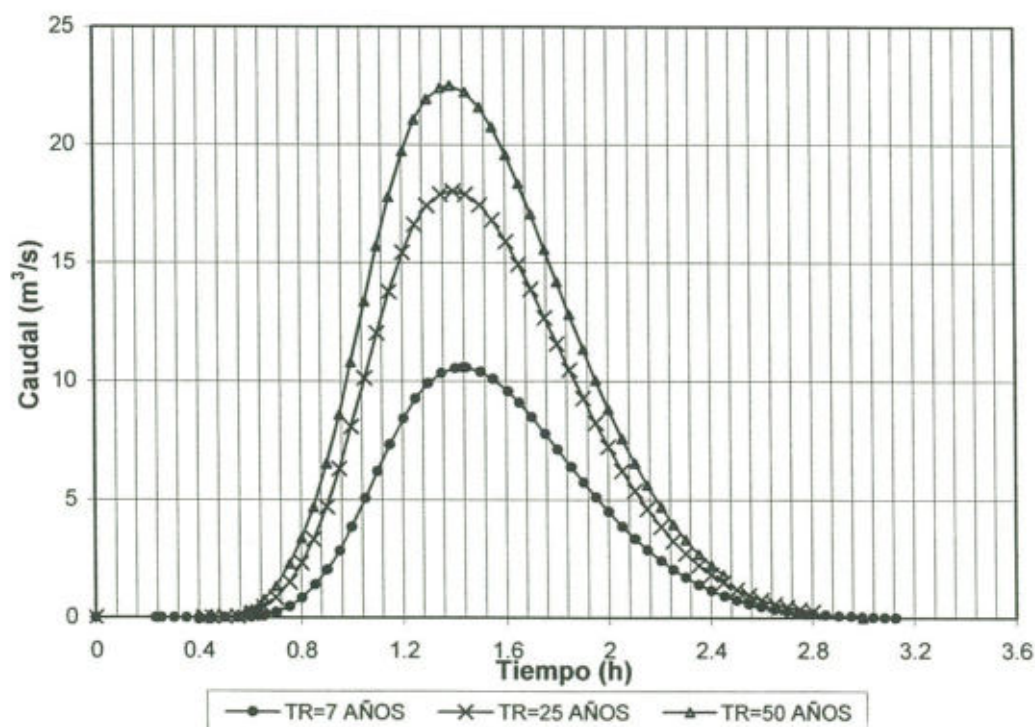

**Fig.Nº. 5.14:** Hidrogramas de crecida para diferentes períodos de retorno en Qda. Rumipamba; Programa MISION.

## CAPITULO 6

### ANÁLISIS COMPARATIVO DE RESULTADOS

Este capítulo tiene el objetivo de comparar los resultados del modelo de precipitación escurrimiento utilizado con otro modelo de significativa utilización en la práctica nacional como es el HIDRO1, con base en la información obtenida de la cuenca de la Qda. Rumipamba.

Se ha realizado una comparación para los escenarios A1, A2, A3 y A4, los resultados de esta simulación se presenta en el **Anexo G (Reportes programa computacional HIDRO1)**.

En el Cuadro G.1, se presenta los datos de los hidrogramas de crecida correspondientes. En la Figura 6.1 se aprecia los hidrogramas generados por el programa HIDRO1.

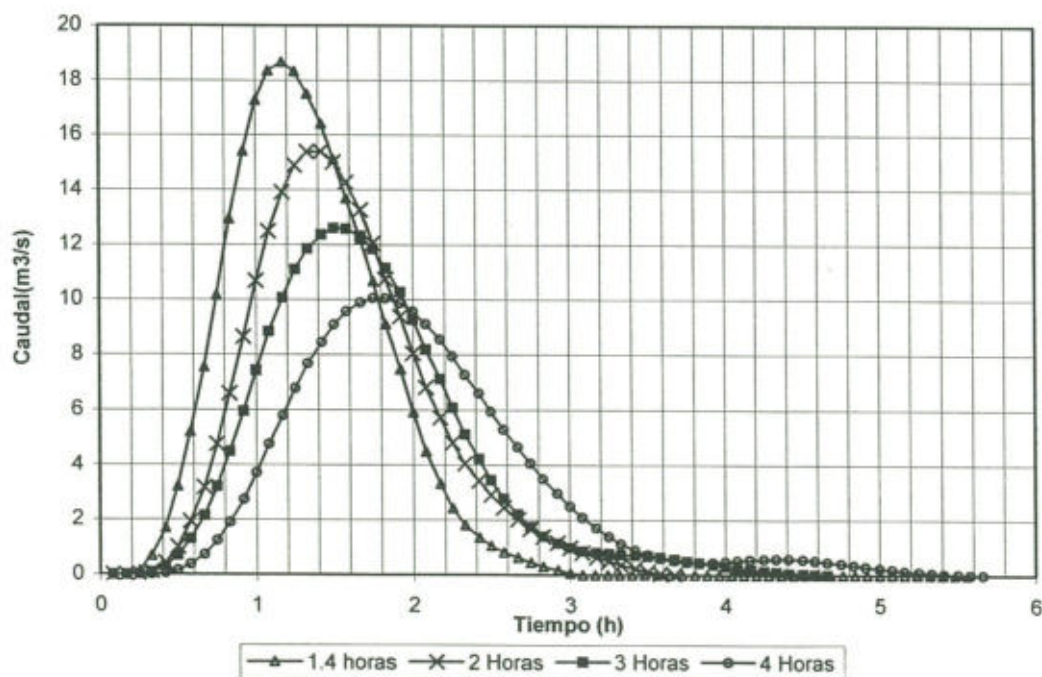

**Fig.Nº.6.1:** Hidrogramas de crecida generados por modelo HIDRO1



La Figura 6.2, presenta los respectivos hidrogramas calculados por el programa MISION. y obtenidos dentro de los escenarios A1 a A4.

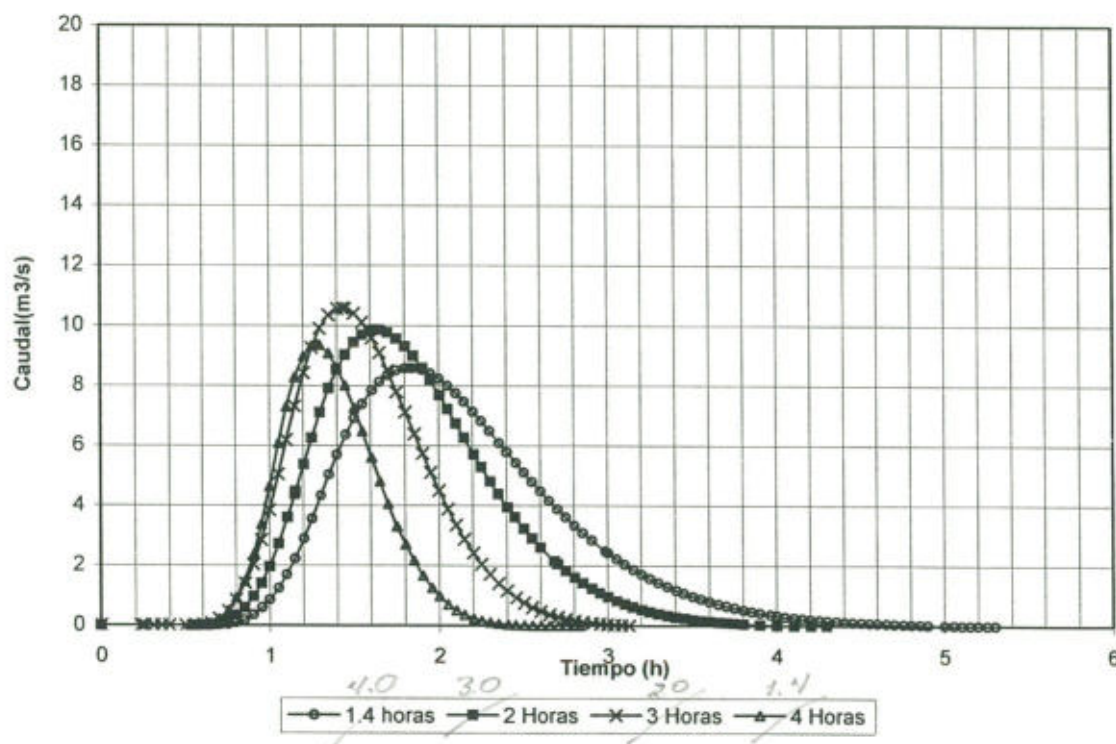

**Fig.Nº.6.2:** Hidrogramas de crecida generados por modelo MISION

Se puede observar que la diferencia entre los dos modelos si es importante, observándose mayores variaciones para los hidrogramas resultantes de lluvias de duraciones bajas de tormentas, la diferencia disminuye a medida que la duración de lluvia aumenta, esto se puede observar en el cuadro 6.1, al comparar los caudales picos y los volúmenes totales entre los dos modelos.

**MICROCUENCA: Rumipamba**

| ESCENARIO                | Símbolo | A1    | A2    | A3    | A4    | Unidad |
|--------------------------|---------|-------|-------|-------|-------|--------|
| <b>RESULTADOS MISION</b> |         |       |       |       |       |        |
| Caudal Pico              | Qp      | 9.37  | 10.58 | 9.85  | 8.58  | m³/s   |
| Volumen de crecida       | Vol     | 23561 | 35410 | 42412 | 44776 | m³     |
| <b>RESULTADOS HIDRO1</b> |         |       |       |       |       |        |
| Caudal Pico              | Qp      | 18.66 | 15.40 | 12.59 | 10.05 | m³/s   |
| Volumen de crecida       | Vol     | 76354 | 69687 | 63688 | 59337 | m³     |

**Cuadro N°.6.1:** Comparación de datos característicos de hidrogramas obtenidos por los programas HIDRO1 y MISION

En cuanto a esta comparación, se debe tomar en cuenta, que el HIDRO1, es un modelo de generación del escurrimiento basados en información de lluvias de diseño. Sus resultados expresan el efecto de considerar a la precipitación de manera uniforme en el tiempo y en el espacio, lo que genera un hidrograma también de diseño (Figura 6.1) y por lo tanto altamente seguro para el diseño de obras ingenieriles.

En tanto el programa MISION, entrega los hidrogramas de tormentas registradas, las cuales presentan en todos los casos una disminución de la precipitación acumulada en su periferia. MISION sin embargo puede adaptarse para el cálculo de lluvias de diseño, cuando se toma en cuenta el período de retorno en el cálculo de tormentas.

Esfuerzos por evaluar el ajuste de forma matemática entre hidrogramas sintéticos resultan de poca ayuda, HIDRO1, no toma en cuenta la forma de la microcuenca ya sea redondeada o alargada. El modelador es el encargado de dividir la microcuenca en las zonas que estimase necesarias para representar la geometría en el modelo. MISION sin embargo logra representar claramente su geometría en la forma del hidrograma de la microcuenca de análisis.

Las técnicas matemáticas, tales como suma de los cuadrados de las desviaciones, suma de las diferencias absolutas o la suma de los cuadrados de las desviaciones elevadas a una potencia deben ser aplicadas en casos donde se compare hidrogramas sintéticos con hidrogramas observados.

## **CAPITULO 7**

### **CONCLUSIONES Y RECOMENDACIONES**

#### **7.1 CONCLUSIONES**

El enfoque para las conclusiones se lo realiza desde el punto de vista de la utilidad del modelo de lluvias, y luego sobre su interrelación con el modelo precipitación - escurrimiento:

##### **Sobre el modelo de lluvias y sus resultados:**

- Se presenta un aporte para la mejorar el entendimiento de un fenómeno altamente complejo como es la lluvia.
- Se desarrolló una metodología de análisis de tormentas que involucra la distribución temporal, la distribución espacial y la influencia de los vientos locales y/o regionales, que modifican la distribución espacial y temporal de las mismas.
- Se calibra el modelo para varios eventos de lluvia, se observa que los parámetros, variables y condiciones de borde utilizados se relacionan mediante curvas cuyo ajuste con los datos observados es significativo. Las tormentas analizadas siguen un patrón de comportamiento, el cual ha sido encasillado a un grupo de curvas y por lo tanto a ecuaciones con un nivel elevado de confiabilidad.
- El modelo desarrollado para las lluvias intensas permite generar relaciones sobre el decrecimiento de la precipitación acumulada de un evento con respecto al aumento del área cubierta.



- Métodos hidrológicos que analizan lluvias extremas, dirigidos a la obtención de curvas Intensidad-Duración-Frecuencia, basados en análisis puntuales de datos de lluvia que no necesariamente son de la misma tormenta, se basan en información procesada en; lo que dentro del modelo de tormentas propuesto se denomina: Centro de tormenta definitivo (CTc).
- La magnitud y dirección de los vientos de altura durante un evento de tormenta, son elementos de gran importancia. Estos producen cambios en la presentación de la lluvia en el tiempo y en el espacio
- Es perfectamente factible obtener curvas Velocidad de Vientos Altos – Duración - Frecuencia, tanto como Distribución Areal – Duración - Frecuencia de tormentas, en busca de mejorar la representación del fenómeno lluvia en toda su magnitud.

#### **Sobre el modelo precipitación escurrimiento y sus resultados:**

- Se demuestra la aplicabilidad del modelo de lluvias en modelos de escurrimiento. El modelo MISION que si bien es más elaborado, a nivel de técnicas de tratamiento de información, que los modelos convencionales; como el HIDRO1, se presenta como un modelo computacional de tipo distribuido con muy buena flexibilidad en el manejo de los elementos de los fenómenos lluvia y escurrimiento.
- Los lenguajes de programación Avenue y VisualBasic son herramientas poderosas de manejo y administración de bases de datos espaciales. La mejora en la programación se debería realizar en ambiente VisualBasic y Avenue conjuntamente.
- La comparación entre modelos presenta la diferencia entre modelos de escurrimiento, que por un lado se enfocan a la evaluación de tormentas de

diseño; como el HIDRO1 y por otro lado, el modelo propuesto; MISION, que se lo encasilla como modelo de escurrimiento de apoyo en la calibración con capacidad de evaluación de escenarios extremos.

- Actualmente los modelos comunes de precipitación-escurrimiento de evento, son utilizados para evaluar escenarios extremos de diseño. Utilizan, tanto para su calibración, validación y evaluación de escenarios una distribución espacial de lluvia de tipo uniforme tanto en tiempo como en espacio, lo que, siendo una simplificación, conlleva a cambiar los valores de los elementos del fenómeno de escurrimiento y no los de la precipitación; como debiera ser, con fines de disminuir las diferencias entre hidrogramas observados y simulados.

## 7.2 RECOMENDACIONES

- El estudio sobre tormentas multicelulares debe ser realizado, tendiente a determinar distribuciones que mejoren el entendimiento y su aplicación en los fenómenos precipitación-escurrimiento.
- Se debiera realizar esfuerzos por regionalizar las curvas obtenidas y así mejorar el entendimiento de las tormentas en distintas partes del país y en la zona tropical, en donde el modelo puede tener buena aceptación.
- El modelo de lluvias propuesto conjuntamente con un modelo de predicción meteorológica a pocas horas, pueden ser utilizados para mejorar los niveles de seguridad y disminución del impacto de lluvias extremas.



## CAPITULO 8

### REFERENCIAS BIBLIOGRAFICAS

- 1 Andrade L. (1997). Utilización de Modelos Precipitación-Escorrimento. Asociación Ecuatoriana de Hidráulica. VII Congreso Nacional de Hidráulica. Quito. Pag.35.
- 2 Andrade L. (1993). Análisis de sistemas de drenaje urbano en computadoras. EPN. Quito. Pag. 6
- 3 Arnold J. Williams J. y A. Nicks. (1985). SWRRB A Simulator for Water Resources in Rural Basins, Model Documentation Volumen I. Pag. 6,129.
- 4 Bathurst J. y O'Connell P. (1992). Future of Distributed Modelling: The Systeme Hydrologique Européen. Terrain Analysis and Distributed Modelling in Hydrology. Paper 13. New York: Edited by Beven and Moore. Pag. 221.
- 5 Battan L. (1964). La Naturaleza de las Tormentas. Argentina: Ed. Universitaria de Buenos Aires. Pag. 53,60.
- 6 Beltrán F. (1995). Investigación de hietogramas críticos y evaluación del efecto de simultaneidad de tormentas en Quito. Tesis de grado para la obtención del título de Ingeniero Civil. EPN. Quito. Pag. 15,77,78,79,90,91,92,93,94
- 7 Beltrán F. (1997). Modelación Matemática de Tormentas Unicelulares. Asociación Ecuatoriana de Hidráulica. VII Congreso Nacional de Hidráulica. Quito. Pag. 71,86
- 8 Beven K. Binley A.(1992). Future of Distributed Modelling: Model Calibration and Uncertainly Prediction. Terrain Analysis and Distributed Modelling in Hydrology. Paper 14. New York: Edited by Beven and Moore. Pag. 234.
- 9 Beven K. y Moore I. (1992) Terrain Analysis and Distributed Modelling in Hydrology, New York: Ed. Wiley & Sons. Pag. 2,3.



- 10 Bogardi J. y H. Nachtnebel. (1994). Multicriteria Decision Analysis in Water Resources Management. Unesco. París. Pag. 25,26.
- 11 Chow Ven Te. (1964). Handbook of applied Hydrology. New York: Mc Graw Hill. Pag. 9.13, 9.14, 9.24.
- 12 Coyne et Bellier, (1987). Estudio de Soluciones Destinadas a Eliminar los Daños y Perjuicios Causados por las Aguas Pluviales en el Sector Occidental de la Ciudad de Quito. Ministerio de Salud Pública, IEOS, Quito. Pag. 36.
- 13 Crespo L. Santa Cruz E. (1989). Modelación del Fenómeno Precipitación Esguerrimiento en Cuencas Hidrográficas. Tesis de grado para la obtención del título de Ingeniero Civil. EPN. Quito. Pag. 23,24.
- 14 Djokic D y Maidment D. (1991). Terrain Analysis for Urban StormWater Modelling. Terrain Analysis and Distributed Modelling in Hydrology. Paper 10. New York: Edited by Beven and Moore. Pag. 188,
- 15 Drayton R. Wilde B. y K Harris (1986). Geographical information System approach to Distributed Modelling. Terrain Analysis and Distributed Modelling in Hydrology. Paper 11. New York: Edited by Beven and Moore. Pag.199.
- 16 Enviromental Systems Research Institute. (1996). ArcView Spatial Analyst. California. Pag. 36,37
- 17 Enviromental Systems Research Institute. (1996). ArcView GIS-The Geographic Information System for Everyone. California. Pag. 310.
- 18 Inzunza Juan. Meteorología Descriptiva. Pag.143, 145, 148, 151, 156, 168, 170, 173, 178, 179.
- 19 Jensen K. y A. Mantoglou. (1992). Future of Distributed Modelling. Terrain Analysis and Distributed Modelling in Hydrology. Paper 12. New York: Edited by Beven and Moore. Pag. 203,210
- 20 Koide S. y Wheeler H. (1986). Subsurface Flow Simulation of a Small Plot at Loch Chon. Terrain Analysis and Distributed Modelling in Hydrology Paper 8, Escotland. Pag. 145.

## ANEXOS

- 21 Mafla E. (1996). Manejo de SIG con Aplicaciones a Recursos Hídricos. EPN. Quito. Pag. 13.
- 22 Monsalve G. (1995). Hidrología en la Ingeniería. Colombia: Ed. Escuela Colombiana de Ingeniería. Pag. 141,232,233.
- 23 Moore I. Grayson R y A. Ladson. (1990). Digital Terrain Modelling: A review of Hydrological, Geomorphological and Biological Applications. Terrain Analysis and Distributed Modelling in Hydrology. Paper 1. New York: Edited by Beven and Moore. 8,18.
- 24 Proaño O. Y Unda B. (1995). Aplicación del Modelo de Simulación Hidrológica SWRRB(Simulación de Recursos Hídricos en Cuencas Rurales) a Cuencas Hidrográficas del Ecuador. Tesis de grado para la obtención del título de Ingeniero Civil. EPN. Quito. Pag. 68,...,74
- 25 Singh Vijay P.(1978). Hydrologic Systems. Volumen 1A. New Jersey: Prentice Hall. Pag. 12,13,21,28,29,30,31,109,111
- 26 Viessman W., Knapp J., Lewis G. y T. Harbaugh. (1977). Introduction to hydrology. Second Edition. New York: Harper & Row Publishers. Pag. 579,67,81,415,623,425,593,597,599.
- 27 Wibold J. (2000). Manual de ArcView 32, EPN(UNISIG). Quito. Pag.7
- 28 Zevallos O. (1985,). "Introducción al tránsito de crecidas en Ríos". Revista Politécnica Volumen X. N°3. Escuela Politécnica Nacional. Quito. Pag 8



**ANEXO A**  
**PLAN DE PROYECTO**

|                                             |                                    |
|---------------------------------------------|------------------------------------|
| PROPUESTO POR:<br>Ing. Franklin Beltrán     | AREA DEL TEMA:<br>HIDROLOGIA       |
| AUSPICIADO POR:<br>Dr.Ing. Laureano Andrade | FECHA:<br>16 de Diciembre del 2002 |

## 1) Tema o Título del Proyecto

**MODELOS DISTRIBUIDOS DE TORMENTAS Y SU APLICACION AL CALCULO DE CRECIDAS**

## 2) Planteamiento del Problema

Los modelos precipitación-escorrentía son ampliamente utilizados en la práctica ingenieril universal, puesto que permiten obtener Hidrogramas de crecidas y caudales máximos, en condiciones de inadecuados registros hidrométricos históricos.<sup>1</sup>

Los modelos entendidos como un conjunto articulado de relaciones físicas y empíricas, tratan de representar un fenómeno físico determinado, generalmente complejo; consideran los factores de mayor importancia en un sistema cerrado de tipo causa - efecto, Por tanto, en la definición del modelo y en su formulación matemática, se hacen simplificaciones, a la vez que se asumen ciertas consideraciones sobre las variables físicas involucradas.

La estructura de los modelos más simples precipitación escorrentía, incluye la representación de los siguientes fenómenos:

Distribución espacial y temporal de la lluvia.

Infiltración y formación de la lluvia efectiva; y,

Formación del escorrentía

Los modelos complejos incorporan también otros procesos como los siguientes: retención superficial, almacenamiento temporal en la superficie de la cuenca, evapotranspiración, usos del agua, afloramiento, etc.

El tema de tesis que se propone se refiere al primero de los fenómenos descritos, que es la representación de la distribución espacial y temporal de la lluvia.

Si bien la disponibilidad de información histórica de las lluvias es mayor que la hidrométrica, la definición de la lluvia de diseño, exige no solamente utilizar datos de observaciones pasadas, sino que mediante técnicas estadísticas y caracterizaciones empíricas se debe establecer formas de representar a eventos críticos de precipitaciones, que no han ocurrido.

En teoría, las lluvias intensas, en relación con las intensidades máximas, se presentan mediante las relaciones intensidad-duración-período de retorno. El INAMHI ha propuesto una distribución espacial de las intensidades máximas de lluvia, basado en criterios de regionalización e interpolación lineal entre estaciones, para las lluvias máximas de 24 horas.

Sobre el efecto de reducción de las intensidades máximas de lluvia en función del área bañada, la investigación en el país es incipiente, y en algunos casos



imposible de realizarla con la escasa red de estaciones pluviométricas disponibles en el país, si se toma en cuenta la extrema variabilidad de las láminas de precipitación que se presentan de un punto geográfico a otro, en relación con el mismo evento de lluvia.

El análisis de un evento de lluvia específico permite apreciar la movilidad geográfica del núcleo de la tormenta en cierta dirección, como resultado de la acción de los vientos en altitud, aspecto que incide en la variación notable de las láminas de lluvia que ocurren como consecuencia del mismo evento en distintos puntos geográficos. De esto surge la pregunta ¿es razonable asumir láminas de lluvia igualmente distribuidas en una cuenca o en un territorio determinado?, y ¿la variabilidad espacial de las láminas de lluvia es determinante en la determinación de los caudales máximos?.

La respuesta a estas preguntas constituye el objetivo básico de este proyecto de tesis, cuyo sustento se amplía a continuación.

### 3) Formulación y Sistematización del Problema

Un evento de lluvia intensa o tormenta es un fenómeno meteórico, de naturaleza compleja, que resulta de la interacción de múltiples factores físicos. Desde la óptica hidrológica, la precipitación es el factor climático principal que aporta humedad a una cuenca hidrográfica, para luego esa humedad redistribuirse en el suelo; el exceso de lluvia forma el escurrimiento.

Los modelos que tratan de representar a una lluvia son generalmente muy simples, y espacialmente se ha considerado a la lámina de lluvia constante, aspecto que no corresponde a la propia naturaleza del fenómeno, muy influenciado por la acción de los vientos.

Por lo expuesto, en esta tesis se propone desarrollar un modelo que simule las lluvias intensas variables en el tiempo y que tome en cuenta la incidencia de la velocidad de los vientos. Estos modelos espacialmente variables pueden incidir también en la magnitud de los caudales máximos de diseño de un proyecto.

### 4) Objetivos de la Investigación

#### a. Objetivo General

Presentar a la comunidad técnica un método de representación del fenómeno precipitación, útil en su aplicación práctica con modelos de escurrimiento. Su aval se obtendría al reproducir los registros relativos a un evento de lluvia basándose en otros registros pluviográficos.

#### b. Objetivos Específicos

- i. Mejorar el conocimiento sobre el proceso de formación de la precipitación.
- ii. Conseguir ajustes de la forma de un pluviograma con base a la utilización de registros pluviográficos de otras estaciones.
- iii. Interpretar las lluvias compuestas como la superposición de tormentas unicelulares
- iv. Permitir un espacio de discusión de este modelos y su aplicación en modelos de generación de crecidas.



## 5) Justificación del Proyecto

- a. Justificación Teórica : La justificación teórica se basa en la simplificación de los modelos de escurrimiento existente, estos consideran a la lluvias de intensidad constante en toda el área durante toda su duración, lo que se discrepa en esta tesis. Esta simplificación en la modelación no debería realizarse en procesos de calibración. Se han realizado esfuerzos por representar la distribución espacial, pero la materia todavía está abierta a las varias interrogantes planteadas. Los estudios actuales se han enfocado a la regionalización y a distribuciones de lluvia en áreas pequeñas; tipo isoyetas o polígonos de Thiessen.

Los modelos de precipitación-escurrimiento toman en cuenta lluvias uniformes durante todo el tiempo de simulación ubicadas espacialmente en las zonas de estudio. Todo esto obviamente redundante en la diferencia entre hidrogramas simulados y observados, entonces, ¿Por qué los modelos utilizados llegan a calibrar sus parámetros si no partieron de un hecho cierto e importante? ¿Cabría indicar entonces indicar que los modelos lluvia-escurrimiento generan los resultados con base ha ajustar sus parámetros erróneamente?

- b. Justificación Metodológica: El crecimiento en el desarrollo de software y hardware, permite ahora la simulación de este tipo de modelos en una PC de escritorio. La mejora de la comprensión de la formación de la lluvia en el tiempo y en el espacio, genera inmediatamente la necesidad de modelarla y a su vez aplicarla en modelos de generación de caudales de crecida de tipo distribuido, siendo estos, los únicos que podrían simular dicho proceso a la par de la generación de lluvias variables en el tiempo y en el espacio.
- c. Justificación Práctica: Mejorar el entendimiento del fenómeno precipitación, redundante en la mejora de la calidad de representación del escurrimiento mediante modelos. Estos modelos se emplean continuamente en el estudio de crecidas y permiten determinar la capacidad que deben tener estructuras de captación, drenaje, protección de cauce y ladera, etc.

## 6) Marco de Referencia

- a) Marco Teórico : El eje de la discusión se enfocará en el entendimiento de tormentas unicelulares. En ellas se puede observar la disminución de la lluvia con el área, del centro a la periferie, Germán Monsalve en su libro Hidrología en la Ingeniería<sup>3</sup>, en el numeral 7.4 denominado Pronóstico de crecientes basados en datos de lluvias, indica que "La distribución espacial de las intensidades de lluvia total crítica sobre una hoya debe ser tal que la máxima intensidad (centro de la lluvia) esté sobre el pluviógrafo de máxima precipitación, y la intensidad disminuya alejándose del centro de lluvia", presenta incluso una ecuación:

$$i_m = i_o (1 - 0.009 \cdot \sqrt{r})$$



Donde;  $r$  es la distancia al centro de la tormenta(m) y  $r < 12000$  m.

$i_m$  es la intensidad de lluvia media

$i_o$  es la intensidad de lluvia en el centro de lluvia

En el trabajo de tesis "Investigación de hietogramas críticos y evaluación del efecto de simultaneidad de tormentas en Quito"<sup>5</sup>, se indica en la página 79 "El claro e interesante proceso acelerado que se observa entre la estación Quito Observatorio y la estación Ñaquito indican una homogenización del fenómeno sobre toda el área de cobertura de tormenta; se podría hablar de una onda de expansión acelerada tendiente a homogeneizar el fenómeno. Se debe notar que el punto coincidente F, indicaría que la onda llega a un máximo de expansión y posteriormente retrocede produciéndose una onda negativa o con efecto inverso que ahora a su paso causa el fin de tormenta. Situación similar se ha observado en 23 de las 38 tormentas analizadas".

Un trabajo posterior a este estado intuitivo de la formación de tormentas más desarrollado y pulido fue presentado en el VII Congreso Nacional de Hidráulica<sup>4</sup> del año 1997, en el que se aporta la definición de patrones tempo-areales, es decir se sustenta la imposibilidad de separar los tradicionales patrones temporales y patrones areales.

#### b) Marco Conceptual

Entre los conceptos importantes se revisará los conceptos de lluvias de una célula o unicelular, expresada como la formación en espacio y tiempo de la acumulación de humedad, que debido a una expansión adiabática alcanza alturas de hasta los 20 km, en cuyo recorrido se produce la formación de lluvia y su consiguiente precipitación<sup>6</sup>, el pluviograma característico de esta tormenta no tiene altibajos, observándose el ascenso permanente en la faja pluviográfica. Este concepto de lluvia o tormenta unicelular conlleva necesariamente al concepto de lluvias multicelulares, las cuales en la presente tesis se lo enfocará como la superposición en tiempo y/o espacio de tormentas unicelulares.

Como aplicación a los modelos de precipitación-escurrimiento, se referirá al proceso de escurrimiento mediante la utilización de modelos distribuidos, los cuales dividen a la cuenca de estudio en parcelas del orden de 30 a 100 m; dependiendo del tamaño de esta y de la capacidad del software y hardware, y relaciona a cada una de ellas valores como: cota, cobertura vegetal, tipo de suelo etc.<sup>7</sup>

En cuanto a software se utilizará programas existentes y por generarse. Los existentes se refieren a programas muy comunes como Autocad y Arview. A su vez, para la simulación de lluvias y escurrimiento se generarán programas aplicados en lenguaje Visual Basic y en Avenue(Lenguaje de programación interna de Arcview).

#### 7) Hipótesis de Trabajo

Las Tormentas de corta duración y fuerte intensidad, comúnmente son localizadas en áreas pequeñas, estas tormentas deben tener un patrón de lluvia tempo-areal, que puede ser ratificado en función de la observación de



tormentas registradas en pluviógrafos simultáneos.

Las tormentas multicelulares representan la superposición de tormentas de una sola célula o unicelular.

#### 8) Aspectos Metodológicos

La caracterización o identificación de comportamientos básicos de la lluvia se abordará desde un punto de vista empírico-matemático, es decir con base a la observación y registro de lluvias se sugerirá un modelo empírico ajustado matemáticamente a lo observado. Variables como la humedad, la temperatura, la presión etc, que si bien son las causantes esenciales de la formación de la tormenta no serán analizadas, posiblemente se puede relacionar estas variables esenciales a la intensidad de lluvia y conseguir un modelo predictivo a pocas horas, pero esto no es objetivo de este trabajo de investigación.

Escenarios de utilización del modelo de lluvias propuesto, se simularán en un modelo simplificado de escurrimiento generado para el propósito.

Las relaciones entre el tiempo de concentración con la pendiente y tipo de cobertura, la velocidad de movimiento en ladera y cauce en relación a la pendiente y al coeficiente de rugosidad de maning, etc ya se han desarrollado en estudios anteriores. Por ello es que el modelo de escurrimiento generado en esta tesis tomará simplificaciones. Ej, no se tomará en cuenta la infiltración.

Adicionalmente, caracterizar un coeficiente de rugosidad de manning en base a cobertura vegetal se lo tomará de bibliografía especializada sin necesidad de calibrar valores.

Un estudio a más detalle de la simulación en cauce y ladera podrá mejorar los resultados de esta simulación de lluvias.

#### 9) Temario

- I. GENERALIDADES Y CONCEPTOS
- II. BASE TEORICA Y ESTADO DEL ARTE
- III. MODELOS DE REPRESENTACIÓN DE LAS LLUVIAS INTENSAS
- IV. MODELO DISTRIBUIDO PROPUESTO
- V. APLICACIONES CON HIDROGRAMAS DE CRECIDA
- VI. ANÁLISIS COMPARTIVO DE RESULTADOS
- VII. CONCLUSIONES Y RECOMENDACIONES
- VIII. BIBLIOGRAFIA

#### 10) Bibliografía

- 1.- Vijay P.Singh, **HYDROLOGIC SYSTEMS, RAINFALL RUNOFF MODELING**
- 2.- Viessman, Knapp, Lewis, **INTRODUCTION TO HYDROLOGY**
- 3.- German Monsalve, **HIDROLOGIA EN LA INGENIERIA**, Ed. Escuela Colombiana de Ingeniería, Colombia, 1995.
- 4.- **VII CONGRESO NACIONAL DE HIDRAULICA**, memorias, 1997



- 5.- Franklin Beltrán, **INVESTIGACIÓN DE HIETOGRAMAS CRITICOS Y EVALUACIÓN DEL EFECTO DE SIMULTANEIDAD DE TORMENTAS EN QUITO**, Tesis. EPN, 1995.
- 6.- Louis J. Battan, **LA NATURALEZA DE LAS TORMENTAS**, Ed. Universitaria de Buenos Aires, Argentina, 1964.
- 7.- Beven, Moore, **TERRAIN ANALYSIS AND DISTRIBUTED MODELLING IN HYDROLOGY**, Paper 11, GEOGRAPHICAL INFORMATION SYSTEM APPROACH TO DISTRIBUTED MODELLING, 1986.
- 8.- **ARCVIEW**, Manual del usuario, Gis by ESRI

11) Presupuesto y Fuentes de Financiamiento

El presupuesto de este estudio se ha calculado en 7 meses de trabajo a tiempo completo por parte del Estudiante interesado. No existe fuente de financiamiento de este proyecto de investigación.

12) Cronograma de Actividades

Se debe indicar que en cuanto a esta actividad, y desde el momento transcurrido en conversaciones con el profesor auspiciante; Dr. Laureano Andrade, el tema de tesis se empezó a desarrollarse en Marzo del 2001, por lo que parte de su análisis ya se ha cumplido. Por la razón anteriormente indicada, el tema de tesis será planificada para seis meses.

Enero 2003

- Selección de tormentas a utilizar
- Ajuste de modelo a tormentas seleccionadas
- Descripción de modelos de tipo distribuidos y sus aplicaciones
- Redacción, Capítulo I, II y III

Febrero 2003

- Generación del modelo de escurrimiento en cauce y ladera
- Redacción, Capítulo IV

Marzo- Abril 2003

- Utilización del modelo en escenarios de generación de tormentas
- Redacción, Capítulo V

Mayo 2003

- Determinación de conclusiones y recomendaciones
- Análisis y síntesis de conclusiones
- Redacción, Capítulo VI, VII, VIII

Firma Estudiante  
Ing. Franklin Beltrán

Firma Profesor Auspiciante  
Dr. Ing. Laureano Andrade

**ANEXO B**  
**PROGRAMA DE APOYO A LA CALIBRACION**

## PROGRAMA DE APOYO A LA CALIBRACION

Para el proceso de calibración se ha realizado un programa ejecutable basado en lenguaje VisualBasic. El lenguaje VisualBasic es un lenguaje orientado a objetos que permite no solamente el manejo de gran cantidad de información sino también la fácil presentación gráfica de los resultados. La Figura B.1 adjunta presenta el menú de pantalla del programa TORMENTA.exe en su fase de ejecución.

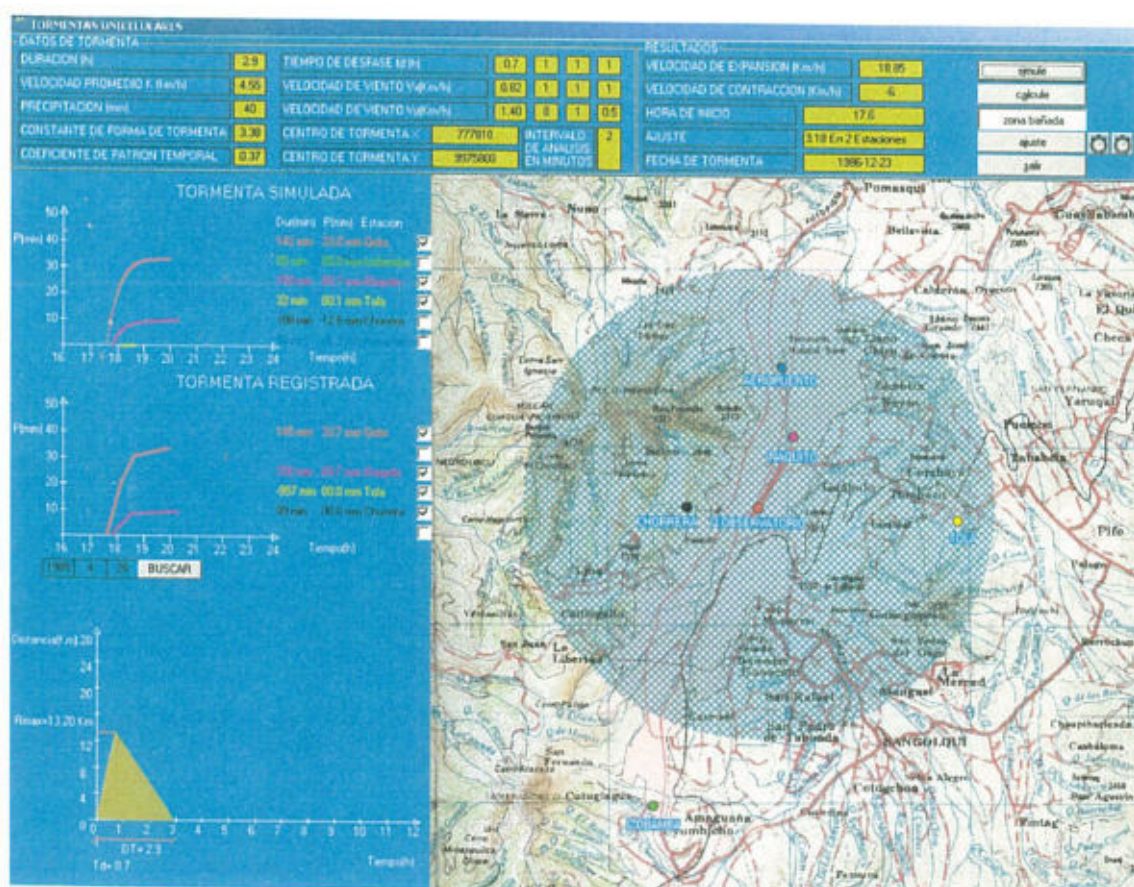

**Fig.N° B.1:** Menú de presentación de programa TORMENTA.EXE



Las características del programa son:

- a) Se lo ha realizado en base a los conceptos del modelo de una tormenta unicelular propuesto en la sección 4.1
- b) Consiste en una serie de cuadros de texto y gráficos lo más amigable posible con el fin de interactuar con el programa.
- c) Se encuentra enlazado a una base de datos de tormentas en la ciudad de Quito-Ecuador, que se encuentra organizada por fecha y consiste en un registro de 38 tormentas simultáneas obtenidas en 6 estaciones pluviográficas, y 269 eventos de lluvia registrados en la estación Meteorológica Quito-Observatorio. Esta información fue organizada dentro del estudio de la referencia 5.
- d) Permite comparar los resultados de los pluviogramas sintéticos con los pluviogramas registrados y genera un número que representa el mejor ajuste entre ellas.
- e) Permite realizar cambios tanto de los parámetros como de las variables para análisis.
- f) Para tratar las variables relacionadas con el viento, se ha incluido dentro del programa TORMENTA.EXE un componente que permita la generación tanto de la magnitud del viento como de su dirección de manera incremental en las 8 posibles direcciones de análisis principales, esto es Norte Nor-este, Este, Sur-Este, Sur, Sur-Oeste, Oeste, Nor-Oeste.

### Menú de ingreso de datos

Consiste en una serie de cuadros de texto, que permite el ingreso de las variables del modelo, éstas son:

- La duración de lluvia en el centro de tormenta  $D(\text{horas})$
- La velocidad media de movimiento de tormenta  $K(\text{Km/h})$
- La precipitación en el centro de tormenta  $PRE(\text{mm})$
- La constante de forma de tormenta  $n$
- El coeficiente del patrón temporal  $K_2$
- El tiempo de desfase  $td(\text{horas})$
- La velocidad de viento en Longitud  $V_x(\text{km/h})$
- La velocidad de viento en Latitud  $V_y(\text{km/h})$
- Las coordenadas en longitud y latitud del inicio del centro de tormenta

| DATOS DE TORMENTA              |      |                                        |         |                                  |   |     |  |
|--------------------------------|------|----------------------------------------|---------|----------------------------------|---|-----|--|
| DURACION (h)                   | 2.9  | TIEMPO DE DESFASE $t_d$ (h)            | 0.7     | 1                                | 1 | 1   |  |
| VELOCIDAD PROMEDIO K (km/h)    | 4.55 | VELOCIDAD DE VIENTO $V_x(\text{Km/h})$ | 0.82    | 1                                | 1 | 1   |  |
| PRECIPITACION (mm)             | 40   | VELOCIDAD DE VIENTO $V_y(\text{Km/h})$ | 1.40    | 0                                | 1 | 0.5 |  |
| CONSTANTE DE FORMA DE TORMENTA | 3.38 | CENTRO DE TORMENTA X                   | 777810  | INTERVALO DE ANALISIS EN MINUTOS |   | 2   |  |
| COEFICIENTE DE PATRON TEMPORAL | 0.37 | CENTRO DE TORMENTA Y                   | 9975800 |                                  |   |     |  |

**Fig. N°.B.2: Menú de ingreso de datos**

Las cajas de texto ubicadas a la derecha del tiempo de desfase y velocidad de viento se las ha utilizado para que el programa calcule dichas variables desde un valor mínimo a un valor máximo según un incremento y posteriormente guarde el valor óptimo según el número de ajuste mínimo.

### Menú de salida de datos (Figura B.3)

- Velocidad de expansión (km/h)
- Velocidad de Contracción (km/h)
- Número de ajuste
- La hora de inicio, también es un dato de ingreso

| RESULTADOS                      |                      |                                                                                                                                                                                                                                                                                                                                                                                        |
|---------------------------------|----------------------|----------------------------------------------------------------------------------------------------------------------------------------------------------------------------------------------------------------------------------------------------------------------------------------------------------------------------------------------------------------------------------------|
| VELOCIDAD DE EXPANSION (Km/h)   | 18.85                | <input type="button" value="simule"/><br><input type="button" value="calcule"/><br><input type="button" value="zona bañada"/><br><input type="button" value="ajuste"/>  <br><input type="button" value="salir"/> |
| VELOCIDAD DE CONTRACCION (Km/h) | -6.                  |                                                                                                                                                                                                                                                                                                                                                                                        |
| HORA DE INICIO                  | 17.6                 |                                                                                                                                                                                                                                                                                                                                                                                        |
| AJUSTE                          | 3.18 En 2 Estaciones |                                                                                                                                                                                                                                                                                                                                                                                        |
| FECHA DE TORMENTA               | 1986-12-23           |                                                                                                                                                                                                                                                                                                                                                                                        |

**Fig.N°.B.3: Menú de salida de datos**

El botón **simule**, aplica el modelo a los datos de tormenta.

El botón **calcule**, aplica cambios en los parámetros y variables para utilizar posteriormente el botón **simule**.

El botón **zona bañada**, presenta en planta la zona afectada por la tormenta sintética analizada

El botón **ajuste**, realiza varias corridas del programa cambiando los valores del tiempo de desfase, velocidad de viento en X(Longitud)  $V_x$  y velocidad de viento en Y(Latitud)  $V_y$ . Con esto devuelve en pantalla los valores de las variables de ingreso con menor número de ajuste.

### Modelo empírico de tormenta

Se indican dos figuras en el menú principal, la primera referente al modelo empírico y la segunda referente a los resultados obtenidos en estaciones



ubicadas en la ciudad de Quito, que registrarían la tormenta simulada por el modelo.

El programa tormenta presenta el modelo empírico de tormenta, en un gráfico que representa el radio de cobertura en el eje de las coordenadas y el tiempo en el eje de las abscisas, en este se observa la influencia del tiempo de desfase ( $t_d$ ) y el resultado del radio máximo que alcanzaría la tormenta. El área más oscura representa los puntos que se encuentran a un radio  $R$  y un tiempo  $t$ . (Figura B.4)

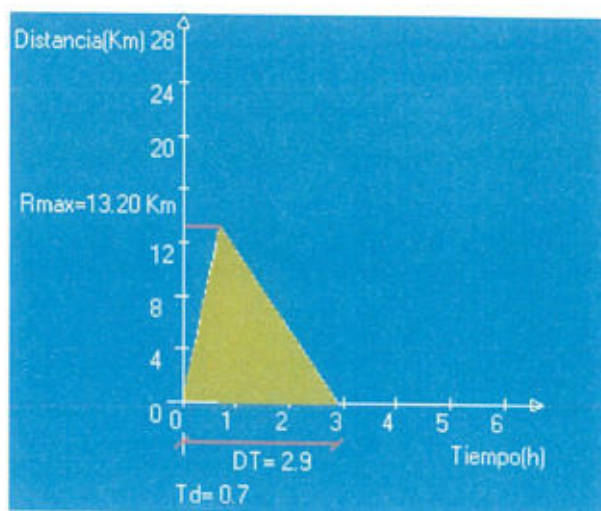

**Fig.Nº.B.4: Modelo empírico de tormenta**

El segundo gráfico, representa los pluviogramas sintéticos obtenidos en la simulación. Figura B.5, en el se presenta adicionalmente los valores de la duración en minutos, la precipitación en milímetros de los pluviogramas simulados en cada una de las estaciones. Se ha utilizado un código de colores para enlazar los datos entregados en el modelo a los pluviogramas respectivos.

Se ha incluido una casilla de verificación para permitir escoger los pluviogramas que se desee observar.

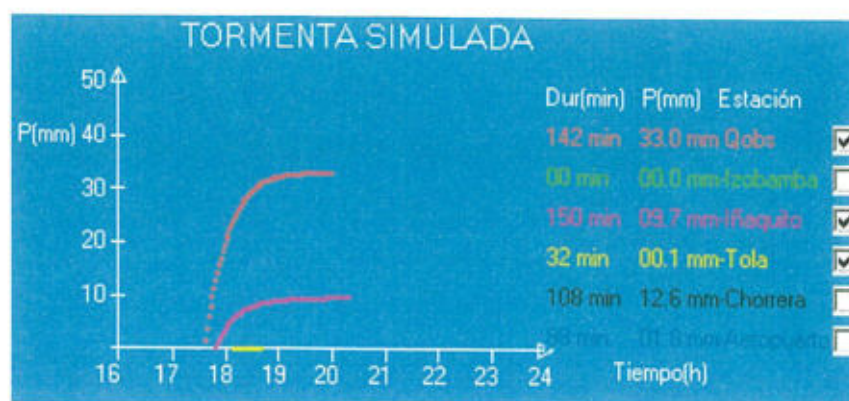

**Fig.Nº.B.5: Pluviógrama simulado**

### Enlace con tormentas observadas

En esta figura se presenta la tormenta observada según su fecha de registro y los respectivos valores de precipitación(mm) y duración(horas). Se ha utilizado el mismo código de colores para reconocer tanto los valores como los gráficos relativos a una determinada estación.

El modelo Tormenta se ha enlazado con una base de datos que dispone de la información de tormenta por fecha utilizada.

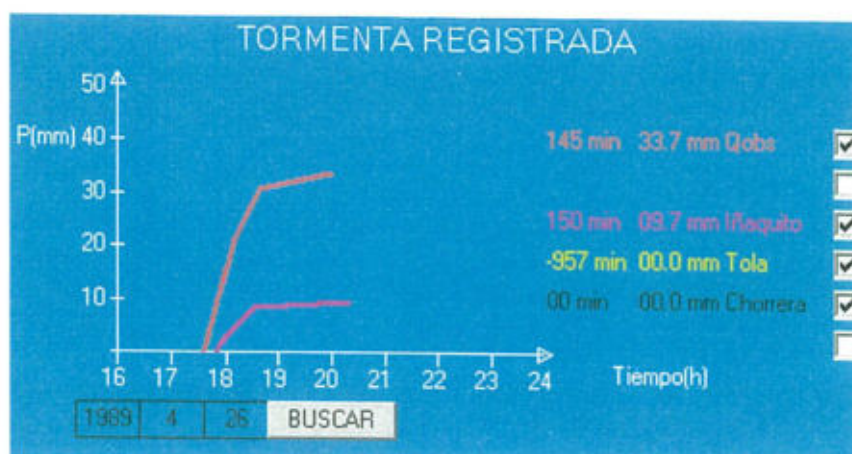

**Fig.Nº. B.6: Pluviógrama registrado**



### Gráfico de la ubicación de las estaciones de registro en Quito.

Un gráfico en planta de la ciudad de Quito, con la ubicación respectiva de las 6 estaciones meteorológicas se ha incorporado para observar la dinámica del modelo.

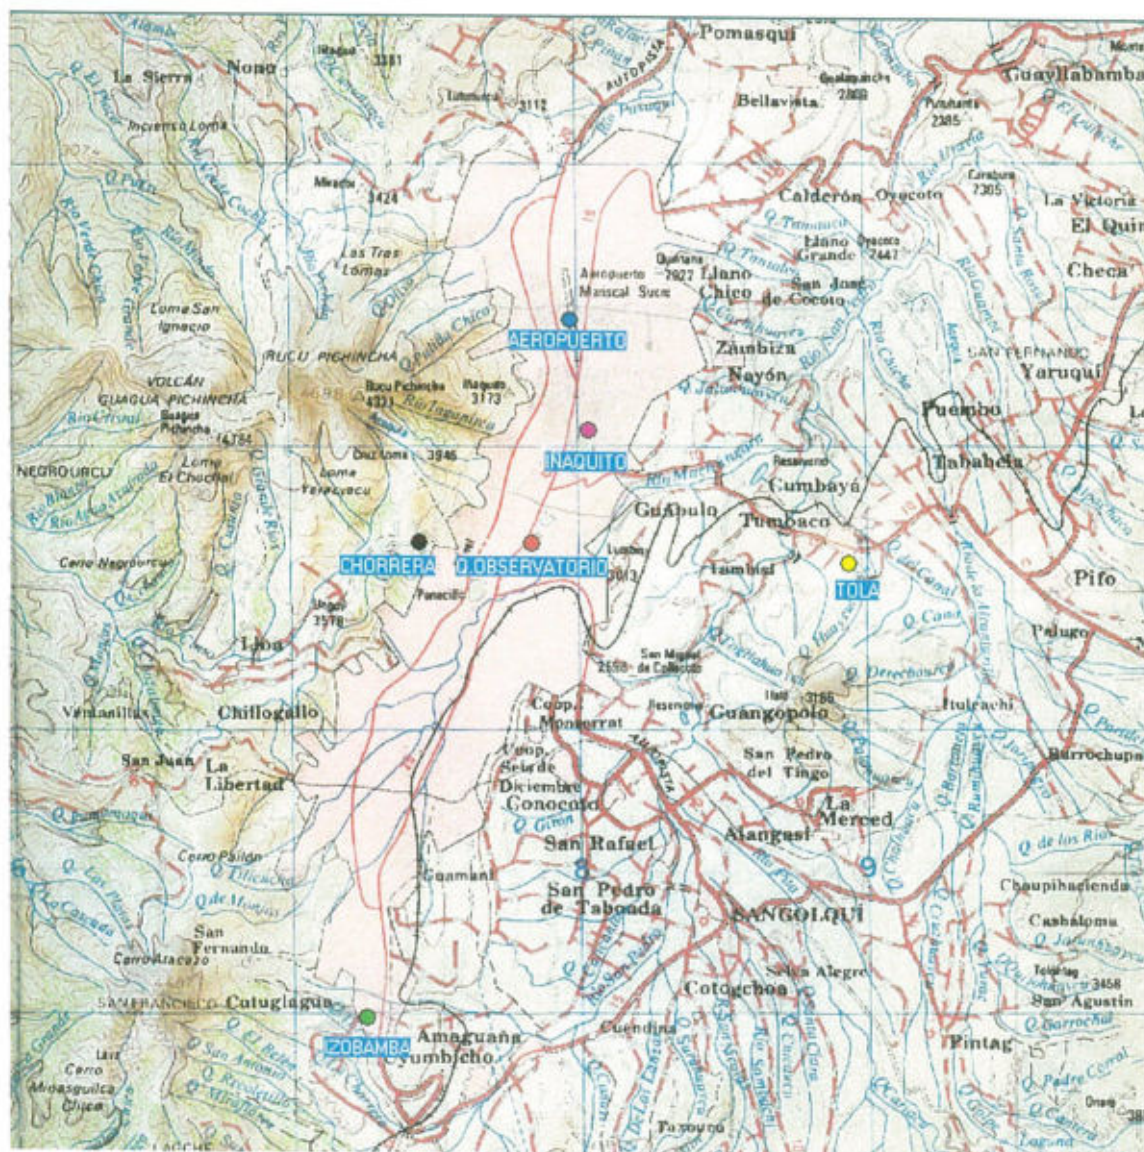

**Fig. N°.B.7:** Ubicación de las estaciones de registro en la ciudad de Quito



## **ANEXO C**

### **ANÁLISIS DE SENSIBILIDAD DEL MODELO**

**TORMENTA: 05-05-1985**

**TORMENTA: 07-12-1982**

ANÁLISIS DE SENSIBILIDAD DE MODELO "TORMENTA" PARA LA TORMENTA REGISTRADA EL 5 DE MAYO DE 1985  
NÚMERO DE AJUSTE PRELIMINAR, CRITERIO CUALITATIVO DEL MODELADOR

| DUR<br>(h)                             | K<br>(km/h) | PRE<br>(mm) | N   | k1  | T0<br>(h) | Vx<br>(km/h)                                                                         | W<br>(km/h)                                                                           | Cx                                                                           | Cy      | HI<br>(h.gmt) | Número de<br>ajuste                                                                             | Valor<br>Cualitativo                                   | Gráfico |
|----------------------------------------|-------------|-------------|-----|-----|-----------|--------------------------------------------------------------------------------------|---------------------------------------------------------------------------------------|------------------------------------------------------------------------------|---------|---------------|-------------------------------------------------------------------------------------------------|--------------------------------------------------------|---------|
| 3.0                                    | 4.35        | 25.6        | 3.0 | 0.3 | 3.79      | 1.00<br>1.50<br>2.00<br>2.34<br>2.50<br>2.60<br>2.70<br>2.80                         | 0.28                                                                                  | 779310                                                                       | 9976300 | 13.5          | 0.368<br>0.329<br>0.279<br>0.219<br>0.253<br>0.298<br>0.351<br>0.419                            | BM<br>B<br>B<br>B<br>B<br>MB<br>D<br>D                 |         |
| 3.0                                    | 4.35        | 25.6        | 3.0 | 0.3 | 3.79      | 0.30<br>0.00<br>0.10<br>0.20<br>0.28<br>0.40<br>0.50<br>0.60<br>0.80<br>1.00<br>1.50 | -0.30<br>0.00<br>0.10<br>0.20<br>0.28<br>0.40<br>0.50<br>0.60<br>0.80<br>1.00<br>1.50 | 779310                                                                       | 9976300 | 13.5          | 0.308<br>0.251<br>0.243<br>0.227<br>0.219<br>0.230<br>0.233<br>0.250<br>0.276<br>0.276<br>0.334 | MB<br>MB<br>B<br>B<br>B<br>B<br>B<br>B<br>B<br>B<br>MB |         |
| 3.0                                    | 4.35        | 25.6        | 3.0 | 0.3 | 3.79      | 2.34                                                                                 | 0.28                                                                                  | 779500<br>779410<br>779360<br>779310<br>779260<br>779210<br>779160<br>779000 | 9976300 | 13.5          | 0.266<br>0.257<br>0.233<br>0.219<br>0.232<br>0.244<br>0.260<br>0.306                            | MB<br>B<br>B<br>B<br>B<br>B<br>B<br>MB                 |         |
| 3.0                                    | 4.35        | 25.6        | 3.0 | 0.3 | 3.79      | 2.34                                                                                 | 0.28                                                                                  | 779310                                                                       | 9976300 | 13.5          | 1.168<br>1.169<br>0.834<br>0.578<br>0.467<br>0.372<br>0.275<br>0.219<br>0.317<br>0.680          | D<br>D<br>D<br>MB<br>MB<br>MB<br>B<br>B<br>MB<br>D     |         |
| 2.6<br>2.8<br>3.0<br>3.3<br>3.5<br>4.0 | 4.35        | 25.6        | 3.0 | 0.3 | 3.79      | 2.34                                                                                 | 0.28                                                                                  | 779310                                                                       | 9976300 | 13.5          | 0.506<br>0.355<br>0.219<br>0.261<br>0.275<br>0.349                                              | D<br>MB<br>B<br>B<br>MB<br>D                           |         |

CUADRO N°: C1.a

ANÁLISIS DE SENSIBILIDAD DE MODELO "TORMENTA" PARA LA TORMENTA REGISTRADA EL 5 DE MAYO DE 1985  
NÚMERO DE AJUSTE PRELIMINAR, CRITERIO CUALITATIVO DEL MODELADOR

| NUMERO DE AJUSTE PRELIMINAR, CRITERIO CUALITATIVO DEL MODELOADOR |             |             |       |     |           |              |              |        |         |               |                     |                      |                                                                                   |       |      |      |      |        |         |      |       |                                                                                     |                                                                                    |
|------------------------------------------------------------------|-------------|-------------|-------|-----|-----------|--------------|--------------|--------|---------|---------------|---------------------|----------------------|-----------------------------------------------------------------------------------|-------|------|------|------|--------|---------|------|-------|-------------------------------------------------------------------------------------|------------------------------------------------------------------------------------|
| DUR<br>(h)                                                       | K<br>(km/h) | PRE<br>(mm) | N     | k1  | TD<br>(h) | Vx<br>(km/h) | Vy<br>(km/h) | Cx     | Cy      | Hi<br>(h.gmt) | Número de<br>ajuste | Valor<br>Cualitativo | Gráfico                                                                           |       |      |      |      |        |         |      |       |                                                                                     |                                                                                    |
| 3.0                                                              | 3.80        | 25.6        | 3.0   | 0.3 | 3.79      | 2.34         | 0.28         | 779310 | 9976300 | 13.5          | 0.468               | D                    |  |       |      |      |      |        |         |      |       |                                                                                     |                                                                                    |
|                                                                  | 4.00        |             |       |     |           |              |              |        |         |               | 0.394               | MB                   |                                                                                   |       |      |      |      |        |         |      |       |                                                                                     |                                                                                    |
|                                                                  | 4.20        |             |       |     |           |              |              |        |         |               | 0.263               | MB                   |                                                                                   |       |      |      |      |        |         |      |       |                                                                                     |                                                                                    |
|                                                                  | 4.25        |             |       |     |           |              |              |        |         |               | 0.238               | B                    |                                                                                   |       |      |      |      |        |         |      |       |                                                                                     |                                                                                    |
|                                                                  | 4.35        |             |       |     |           |              |              |        |         |               | 0.219               | B                    |                                                                                   |       |      |      |      |        |         |      |       |                                                                                     |                                                                                    |
|                                                                  | 4.50        |             |       |     |           |              |              |        |         |               | 0.240               | B                    |                                                                                   |       |      |      |      |        |         |      |       |                                                                                     |                                                                                    |
|                                                                  | 4.75        |             |       |     |           |              |              |        |         |               | 0.287               | B                    |                                                                                   |       |      |      |      |        |         |      |       |                                                                                     |                                                                                    |
|                                                                  | 4.90        |             |       |     |           |              |              |        |         |               | 0.289               | B                    |                                                                                   |       |      |      |      |        |         |      |       |                                                                                     |                                                                                    |
|                                                                  | 5.00        |             |       |     |           |              |              |        |         |               | 0.300               | MB                   |                                                                                   |       |      |      |      |        |         |      |       |                                                                                     |                                                                                    |
|                                                                  | 5.20        |             |       |     |           |              |              |        |         |               | 0.310               | MB                   |                                                                                   |       |      |      |      |        |         |      |       |                                                                                     |                                                                                    |
|                                                                  | 5.50        |             |       |     |           |              |              |        |         |               | 0.350               | MB                   |                                                                                   |       |      |      |      |        |         |      |       |                                                                                     |                                                                                    |
|                                                                  | 6.00        |             |       |     |           |              |              |        |         |               | 0.400               | MB                   |                                                                                   |       |      |      |      |        |         |      |       |                                                                                     |                                                                                    |
|                                                                  | 7.00        |             |       |     |           |              |              |        |         |               | 0.510               | MB                   |                                                                                   |       |      |      |      |        |         |      |       |                                                                                     |                                                                                    |
|                                                                  | 8.00        |             |       |     |           |              |              |        |         |               | 0.600               | D                    |                                                                                   |       |      |      |      |        |         |      |       |                                                                                     |                                                                                    |
| 3.0                                                              | 4.35        | 25.6        | 1.0   | 0.3 | 3.79      | 2.34         | 0.28         | 779310 | 9976300 | 13.5          | 0.710               | D                    |  |       |      |      |      |        |         |      |       |                                                                                     |                                                                                    |
|                                                                  | 2.0         |             | 0.360 |     |           |              |              |        |         |               | MB                  |                      |                                                                                   |       |      |      |      |        |         |      |       |                                                                                     |                                                                                    |
|                                                                  | 2.5         |             | 0.287 |     |           |              |              |        |         |               | B                   |                      |                                                                                   |       |      |      |      |        |         |      |       |                                                                                     |                                                                                    |
|                                                                  | 2.8         |             | 0.245 |     |           |              |              |        |         |               | B                   |                      |                                                                                   |       |      |      |      |        |         |      |       |                                                                                     |                                                                                    |
|                                                                  | 3.0         |             | 0.219 |     |           |              |              |        |         |               | B                   |                      |                                                                                   |       |      |      |      |        |         |      |       |                                                                                     |                                                                                    |
|                                                                  | 3.2         |             | 0.236 |     |           |              |              |        |         |               | B                   |                      |                                                                                   |       |      |      |      |        |         |      |       |                                                                                     |                                                                                    |
|                                                                  | 3.5         |             | 0.257 |     |           |              |              |        |         |               | MB                  |                      |                                                                                   |       |      |      |      |        |         |      |       |                                                                                     |                                                                                    |
|                                                                  | 4.0         |             | 0.295 |     |           |              |              |        |         |               | MB                  |                      |                                                                                   |       |      |      |      |        |         |      |       |                                                                                     |                                                                                    |
|                                                                  | 4.5         |             | 0.330 |     |           |              |              |        |         |               | MB                  |                      |                                                                                   |       |      |      |      |        |         |      |       |                                                                                     |                                                                                    |
|                                                                  | 5.0         |             | 0.360 |     |           |              |              |        |         |               | MB                  |                      |                                                                                   |       |      |      |      |        |         |      |       |                                                                                     |                                                                                    |
|                                                                  | 6.0         |             | 0.420 |     |           |              |              |        |         |               | D                   |                      |                                                                                   |       |      |      |      |        |         |      |       |                                                                                     |                                                                                    |
|                                                                  | 3.0         |             | 4.35  |     |           |              |              |        |         |               | 25.6                | 3.0                  |                                                                                   | 0.1   | 3.79 | 2.34 | 0.28 | 779310 | 9976300 | 13.5 | 0.330 | B                                                                                   |  |
|                                                                  |             |             | 0.3   |     |           |              |              |        |         |               |                     |                      |                                                                                   | 0.219 |      |      |      |        |         |      | B     |                                                                                     |                                                                                    |
|                                                                  |             |             | 0.4   |     |           |              |              |        |         |               |                     |                      |                                                                                   | 0.250 |      |      |      |        |         |      | B     |                                                                                     |                                                                                    |
| 0.5                                                              |             | 0.280       | MB    |     |           |              |              |        |         |               |                     |                      |                                                                                   |       |      |      |      |        |         |      |       |                                                                                     |                                                                                    |
| 0.6                                                              |             | 0.300       | MB    |     |           |              |              |        |         |               |                     |                      |                                                                                   |       |      |      |      |        |         |      |       |                                                                                     |                                                                                    |
| 1.0                                                              |             | 0.360       | MB    |     |           |              |              |        |         |               |                     |                      |                                                                                   |       |      |      |      |        |         |      |       |                                                                                     |                                                                                    |
| 2.0                                                              |             | 0.400       | D     |     |           |              |              |        |         |               |                     |                      |                                                                                   |       |      |      |      |        |         |      |       |                                                                                     |                                                                                    |
| 3.0                                                              |             | 4.35        | 25.6  | 3.0 | 0.3       | 3.79         | 2.34         | 0.28   | 779310  | 9976300       |                     |                      | 13.5                                                                              | 2.130 |      |      |      |        |         |      | B     |  |                                                                                    |
|                                                                  |             | 0.890       |       |     |           |              |              |        |         |               |                     |                      |                                                                                   | B     |      |      |      |        |         |      |       |                                                                                     |                                                                                    |
|                                                                  |             | 0.320       |       |     |           |              |              |        |         |               |                     |                      |                                                                                   | B     |      |      |      |        |         |      |       |                                                                                     |                                                                                    |
|                                                                  | 0.219       | B           |       |     |           |              |              |        |         |               |                     |                      |                                                                                   |       |      |      |      |        |         |      |       |                                                                                     |                                                                                    |
|                                                                  | 0.380       | B           |       |     |           |              |              |        |         |               |                     |                      |                                                                                   |       |      |      |      |        |         |      |       |                                                                                     |                                                                                    |
|                                                                  | 1.100       | B           |       |     |           |              |              |        |         |               |                     |                      |                                                                                   |       |      |      |      |        |         |      |       |                                                                                     |                                                                                    |

Nota: Valor cualitativo B= Bueno  
MB=Medianamente Bueno  
D=Deficiente

CUADRO N°: C1.b



## ANÁLISIS ESTADÍSTICO DE ACUERDO A CRITERIO CUALITATIVO

TORMENTA REGISTRADA EL 5 DE MAYO DE 1985

## 1.- RANGO BUENO(B)

| DUR<br>(h) | K<br>(km/h) | PRE<br>(mm) | n    | kl   | TD<br>(h) | Vx<br>(km/h) | Vy<br>(km/h) | Cx     | Cy      | Hi<br>(h.gmt) | Número de<br>ajuste | Valor<br>Cualitativo | Número de<br>ajuste definitivo |
|------------|-------------|-------------|------|------|-----------|--------------|--------------|--------|---------|---------------|---------------------|----------------------|--------------------------------|
| 3.00       | 4.35        | 25.60       | 3.00 | 0.30 | 3.79      | 1.50         | 0.28         | 779310 | 9976300 | 13.5          | 0.329               | B                    | 0                              |
| 3.00       | 4.35        | 25.60       | 3.00 | 0.30 | 3.79      | 2.00         | 0.28         | 779310 | 9976300 | 13.5          | 0.279               | B                    | 0                              |
| 3.00       | 4.35        | 25.60       | 3.00 | 0.30 | 3.79      | 2.34         | 0.28         | 779310 | 9976300 | 13.5          | 0.219               | B                    | 0                              |
| 3.00       | 4.35        | 25.60       | 3.00 | 0.30 | 3.79      | 2.50         | 0.28         | 779310 | 9976300 | 13.5          | 0.253               | B                    | 0                              |
| 3.00       | 4.35        | 25.60       | 3.00 | 0.30 | 3.79      | 2.34         | 0.10         | 779310 | 9976300 | 13.5          | 0.243               | B                    | 0                              |
| 3.00       | 4.35        | 25.60       | 3.00 | 0.30 | 3.79      | 2.34         | 0.20         | 779310 | 9976300 | 13.5          | 0.227               | B                    | 0                              |
| 3.00       | 4.35        | 25.60       | 3.00 | 0.30 | 3.79      | 2.34         | 0.40         | 779310 | 9976300 | 13.5          | 0.230               | B                    | 0                              |
| 3.00       | 4.35        | 25.60       | 3.00 | 0.30 | 3.79      | 2.34         | 0.50         | 779310 | 9976300 | 13.5          | 0.233               | B                    | 0                              |
| 3.00       | 4.35        | 25.60       | 3.00 | 0.30 | 3.79      | 2.34         | 0.60         | 779310 | 9976300 | 13.5          | 0.250               | B                    | 0                              |
| 3.00       | 4.35        | 25.60       | 3.00 | 0.30 | 3.79      | 2.34         | 0.80         | 779310 | 9976300 | 13.5          | 0.276               | B                    | 0                              |
| 3.00       | 4.35        | 25.60       | 3.00 | 0.30 | 3.79      | 2.34         | 1.00         | 779310 | 9976300 | 13.5          | 0.276               | B                    | 0                              |
| 3.00       | 4.35        | 25.60       | 3.00 | 0.30 | 3.79      | 2.34         | 0.28         | 779460 | 9976300 | 13.5          | 0.278               | B                    | 0                              |
| 3.00       | 4.35        | 25.60       | 3.00 | 0.30 | 3.79      | 2.34         | 0.28         | 779410 | 9976300 | 13.5          | 0.257               | B                    | 0                              |
| 3.00       | 4.35        | 25.60       | 3.00 | 0.30 | 3.79      | 2.34         | 0.28         | 779360 | 9976300 | 13.5          | 0.233               | B                    | 0                              |
| 3.00       | 4.35        | 25.60       | 3.00 | 0.30 | 3.79      | 2.34         | 0.28         | 779260 | 9976300 | 13.5          | 0.232               | B                    | 0                              |
| 3.00       | 4.35        | 25.60       | 3.00 | 0.30 | 3.79      | 2.34         | 0.28         | 779210 | 9976300 | 13.5          | 0.244               | B                    | 0                              |
| 3.00       | 4.35        | 25.60       | 3.00 | 0.30 | 3.79      | 2.34         | 0.28         | 779160 | 9976300 | 13.5          | 0.260               | B                    | 0                              |
| 3.00       | 4.35        | 25.60       | 3.00 | 0.30 | 3.79      | 2.34         | 0.28         | 779110 | 9976300 | 13.5          | 0.277               | B                    | 0                              |
| 3.00       | 4.35        | 25.60       | 3.00 | 0.30 | 3.50      | 2.34         | 0.28         | 779310 | 9976300 | 13.5          | 0.275               | B                    | 0                              |
| 3.25       | 4.35        | 25.60       | 3.00 | 0.30 | 3.79      | 2.34         | 0.28         | 779310 | 9976300 | 13.5          | 0.261               | B                    | 0                              |
| 3.00       | 4.25        | 25.60       | 3.00 | 0.30 | 3.79      | 2.34         | 0.28         | 779310 | 9976300 | 13.5          | 0.238               | B                    | 0                              |
| 3.00       | 4.50        | 25.60       | 3.00 | 0.30 | 3.79      | 2.34         | 0.28         | 779310 | 9976300 | 13.5          | 0.240               | B                    | 0                              |
| 3.00       | 4.75        | 25.60       | 3.00 | 0.30 | 3.79      | 2.34         | 0.28         | 779310 | 9976300 | 13.5          | 0.287               | B                    | 0                              |
| 3.00       | 4.90        | 25.60       | 3.00 | 0.30 | 3.79      | 2.34         | 0.28         | 779310 | 9976300 | 13.5          | 0.289               | B                    | 0                              |
| 3.00       | 4.35        | 25.60       | 2.50 | 0.30 | 3.79      | 2.34         | 0.28         | 779310 | 9976300 | 13.5          | 0.287               | B                    | 0                              |
| 3.00       | 4.35        | 25.60       | 2.80 | 0.30 | 3.79      | 2.34         | 0.28         | 779310 | 9976300 | 13.5          | 0.245               | B                    | 0                              |
| 3.00       | 4.35        | 25.60       | 3.20 | 0.30 | 3.79      | 2.34         | 0.28         | 779310 | 9976300 | 13.5          | 0.236               | B                    | 0                              |
| 3.00       | 4.35        | 25.60       | 3.00 | 0.10 | 3.79      | 2.34         | 0.28         | 779310 | 9976300 | 13.5          | 0.330               | B                    | 0                              |
| 3.00       | 4.35        | 25.60       | 3.00 | 0.40 | 3.79      | 2.34         | 0.28         | 779310 | 9976300 | 13.5          | 0.250               | B                    | 0                              |
| MAX        |             |             |      |      |           |              |              |        |         |               | 0.330               |                      | 0                              |
| MIN        |             |             |      |      |           |              |              |        |         |               | 0.219               |                      | 0                              |
| MED        |             |             |      |      |           |              |              |        |         |               | 0.260               |                      | 0                              |
| NUMERO     |             |             |      |      |           |              |              |        |         |               | 29                  |                      | 29                             |

Nota: El número de ajuste definitivo se lo ha obtenido multiplicando el número de ajuste para el valor de:

510

## CUADRO N°: C.2.a

## 2.- RANGO MEDIANAMENTE BUENO(MB)

| DUR<br>(h) | K<br>(km/h) | PRE<br>(mm) | n    | kl   | TD<br>(h) | Vx<br>(km/h) | Vy<br>(km/h) | Cx     | Cy      | Hi<br>(h.gmt) | Número de<br>ajuste | Valor<br>Cualitativo | Número de<br>ajuste definitivo |
|------------|-------------|-------------|------|------|-----------|--------------|--------------|--------|---------|---------------|---------------------|----------------------|--------------------------------|
| 3.00       | 4.35        | 25.60       | 3.00 | 0.30 | 3.79      | 2.34         | -0.30        | 779310 | 9976300 | 13.5          | 0.308               | MB                   | 0                              |
| 3.00       | 4.35        | 25.60       | 3.00 | 0.30 | 3.79      | 2.34         | 0.00         | 779310 | 9976300 | 13.5          | 0.251               | MB                   | 0                              |
| 3.00       | 4.35        | 25.60       | 3.00 | 0.30 | 3.79      | 2.34         | 1.50         | 779310 | 9976300 | 13.5          | 0.334               | MB                   | 0                              |
| 3.00       | 4.35        | 25.60       | 3.00 | 0.30 | 2.00      | 2.34         | 0.28         | 779310 | 9976300 | 13.5          | 0.578               | MB                   | 0                              |
| 3.00       | 4.35        | 25.60       | 3.00 | 0.30 | 2.50      | 2.34         | 0.28         | 779310 | 9976300 | 13.5          | 0.467               | MB                   | 0                              |
| 3.00       | 4.35        | 25.60       | 3.00 | 0.30 | 3.00      | 2.34         | 0.28         | 779310 | 9976300 | 13.5          | 0.372               | MB                   | 0                              |
| 3.00       | 4.35        | 25.60       | 3.00 | 0.30 | 4.00      | 2.34         | 0.28         | 779310 | 9976300 | 13.5          | 0.317               | MB                   | 0                              |
| 2.75       | 4.35        | 25.60       | 3.00 | 0.30 | 3.79      | 2.34         | 0.28         | 779310 | 9976300 | 13.5          | 0.355               | MB                   | 0                              |
| 3.50       | 4.35        | 25.60       | 3.00 | 0.30 | 3.79      | 2.34         | 0.28         | 779310 | 9976300 | 13.5          | 0.275               | MB                   | 0                              |
| 3.00       | 4.00        | 25.60       | 3.00 | 0.30 | 3.79      | 2.34         | 0.28         | 779310 | 9976300 | 13.5          | 0.394               | MB                   | 0                              |
| 3.00       | 4.20        | 25.60       | 3.00 | 0.30 | 3.79      | 2.34         | 0.28         | 779310 | 9976300 | 13.5          | 0.263               | MB                   | 0                              |
| 3.00       | 5.00        | 25.60       | 3.00 | 0.30 | 3.79      | 2.34         | 0.28         | 779310 | 9976300 | 13.5          | 0.300               | MB                   | 0                              |
| 3.00       | 5.20        | 25.60       | 3.00 | 0.30 | 3.79      | 2.34         | 0.28         | 779310 | 9976300 | 13.5          | 0.310               | MB                   | 0                              |
| 3.00       | 5.50        | 25.60       | 3.00 | 0.30 | 3.79      | 2.34         | 0.28         | 779310 | 9976300 | 13.5          | 0.350               | MB                   | 0                              |
| 3.00       | 6.00        | 25.60       | 3.00 | 0.30 | 3.79      | 2.34         | 0.28         | 779310 | 9976300 | 13.5          | 0.400               | MB                   | 0                              |
| 3.00       | 7.00        | 25.60       | 3.00 | 0.30 | 3.79      | 2.34         | 0.28         | 779310 | 9976300 | 13.5          | 0.510               | MB                   | 0                              |
| 3.00       | 4.35        | 25.60       | 2.00 | 0.30 | 3.79      | 2.34         | 0.28         | 779310 | 9976300 | 13.5          | 0.360               | MB                   | 0                              |
| 3.00       | 4.35        | 25.60       | 3.50 | 0.30 | 3.79      | 2.34         | 0.28         | 779310 | 9976300 | 13.5          | 0.257               | MB                   | 0                              |
| 3.00       | 4.35        | 25.60       | 4.00 | 0.30 | 3.79      | 2.34         | 0.28         | 779310 | 9976300 | 13.5          | 0.295               | MB                   | 0                              |
| 3.00       | 4.35        | 25.60       | 4.50 | 0.30 | 3.79      | 2.34         | 0.28         | 779310 | 9976300 | 13.5          | 0.330               | MB                   | 0                              |
| 3.00       | 4.35        | 25.60       | 5.00 | 0.30 | 3.79      | 2.34         | 0.28         | 779310 | 9976300 | 13.5          | 0.360               | MB                   | 0                              |
| 3.00       | 4.35        | 25.60       | 3.00 | 0.50 | 3.79      | 2.34         | 0.28         | 779310 | 9976300 | 13.5          | 0.280               | MB                   | 0                              |
| 3.00       | 4.35        | 25.60       | 3.00 | 0.60 | 3.79      | 2.34         | 0.28         | 779310 | 9976300 | 13.5          | 0.300               | MB                   | 0                              |
| 3.00       | 4.35        | 25.60       | 3.00 | 1.00 | 3.79      | 2.34         | 0.28         | 779310 | 9976300 | 13.5          | 0.360               | MB                   | 0                              |
| 3.00       | 4.35        | 25.60       | 3.00 | 0.30 | 3.79      | 1.00         | 0.28         | 779310 | 9976300 | 13.5          | 0.368               | MB                   | 0                              |
| 3.00       | 4.35        | 25.60       | 3.00 | 0.30 | 3.79      | 2.60         | 0.28         | 779310 | 9976300 | 13.5          | 0.298               | MB                   | 0                              |
| MAX        |             |             |      |      |           |              |              |        |         |               | 0.58                |                      | 0                              |
| MIN        |             |             |      |      |           |              |              |        |         |               | 0.25                |                      | 0                              |
| MED        |             |             |      |      |           |              |              |        |         |               | 0.35                |                      | 0                              |
| NUMERO     |             |             |      |      |           |              |              |        |         |               | 26                  |                      | 26                             |

## CUADRO N°: C.2.b

## 3.- RANGO DEFICIENTE(D)

| DUR<br>(h) | K<br>(km/h) | PRE<br>(mm) | N    | kl   | TD<br>(h) | Vx<br>(km/h) | Vy<br>(km/h) | Cx     | Cy      | Hi<br>(h.gmt) | Número de<br>ajuste | Valor<br>Cualitativo | Número de<br>ajuste definitivo |
|------------|-------------|-------------|------|------|-----------|--------------|--------------|--------|---------|---------------|---------------------|----------------------|--------------------------------|
| 3.00       | 4.35        | 25.60       | 3.00 | 0.30 | 3.79      | 2.70         | 0.28         | 779310 | 9976300 | 13.5          | 0.351               | D                    | 0                              |
| 3.00       | 4.35        | 25.60       | 3.00 | 0.30 | 3.79      | 2.80         | 0.28         | 779310 | 9976300 | 13.5          | 0.419               | D                    | 0                              |
| 3.00       | 4.35        | 25.60       | 3.00 | 0.30 | -2.00     | 2.34         | 0.28         | 779310 | 9976300 | 13.5          | 1.198               | D                    | 0                              |
| 3.00       | 4.35        | 25.60       | 3.00 | 0.30 | 0.00      | 2.34         | 0.28         | 779310 | 9976300 | 13.5          | 1.169               | D                    | 0                              |
| 3.00       | 4.35        | 25.60       | 3.00 | 0.30 | 1.00      | 2.34         | 0.28         | 779310 | 9976300 | 13.5          | 0.834               | D                    | 0                              |
| 3.00       | 4.35        | 25.60       | 3.00 | 0.30 | 5.00      | 2.34         | 0.28         | 779310 | 9976300 | 13.5          | 0.680               | D                    | 0                              |
| 2.60       | 4.35        | 25.60       | 3.00 | 0.30 | 3.79      | 2.34         | 0.28         | 779310 | 9976300 | 13.5          | 0.506               | D                    | 0                              |
| 4.00       | 4.35        | 25.60       | 3.00 | 0.30 | 3.79      | 2.34         | 0.28         | 779310 | 9976300 | 13.5          | 0.349               | D                    | 0                              |
| 3.00       | 3.75        | 25.60       | 3.00 | 0.30 | 3.79      | 2.34         | 0.28         | 779310 | 9976300 | 13.5          | 0.507               | D                    | 0                              |
| 3.00       | 3.80        | 25.60       | 3.00 | 0.30 | 3.79      | 2.34         | 0.28         | 779310 | 9976300 | 13.5          | 0.468               | D                    | 0                              |
| 3.00       | 8.00        | 25.60       | 3.00 | 0.30 | 3.79      | 2.34         | 0.28         | 779310 | 9976300 | 13.5          | 0.600               | D                    | 0                              |
| 3.00       | 4.35        | 25.60       | 1.00 | 0.30 | 3.79      | 2.34         | 0.28         | 779310 | 9976300 | 13.5          | 0.710               | D                    | 0                              |
| 3.00       | 4.35        | 25.60       | 6.00 | 0.30 | 3.79      | 2.34         | 0.28         | 779310 | 9976300 | 13.5          | 0.420               | D                    | 0                              |
| 3.00       | 4.35        | 25.60       | 3.00 | 2.00 | 3.79      | 2.34         | 0.28         | 779310 | 9976300 | 13.5          | 0.400               | D                    | 0                              |
| MAX        |             |             |      |      |           |              |              |        |         |               | 1.198               |                      | 0                              |
| MIN        |             |             |      |      |           |              |              |        |         |               | 0.349               |                      | 0                              |
| MED        |             |             |      |      |           |              |              |        |         |               | 0.615               |                      | 0                              |
| NUMERO     |             |             |      |      |           |              |              |        |         |               | 14                  |                      | 0                              |

Conclusión:

|                 |                    |
|-----------------|--------------------|
| Najuste<=50     | BUENO              |
| 50 <Najuste<=80 | MEDIANAMENTE BUENO |
| Najuste>80      | DEFICIENTE         |

CUADRO N°: C.2.c



ANÁLISIS DE SENSIBILIDAD DE MODELO "TORMENTA" PARA LA TORMENTA REGISTRADA EL 7 DE DICIEMBRE DE 1982

| DUR<br>(h)                                           | K<br>(km/h) | PRE<br>(mm) | n    | AI   | TD<br>(h) | Vx<br>(km/h) | Vy<br>(km/h) | Cx                                                                 | Cy      | H(hora<br>Local) | Número<br>de ajuste                                  | Valor<br>Cualitativo              | Gráfico 1                     |                                              | Gráfico 2                                       |                       |
|------------------------------------------------------|-------------|-------------|------|------|-----------|--------------|--------------|--------------------------------------------------------------------|---------|------------------|------------------------------------------------------|-----------------------------------|-------------------------------|----------------------------------------------|-------------------------------------------------|-----------------------|
|                                                      |             |             |      |      |           |              |              |                                                                    |         |                  |                                                      |                                   | LATITUD DE CENTRO DE TORMENTA | % de Número de ajuste                        | % de cambio de variable                         | % de Número de ajuste |
| 3.25                                                 | 5.37        | 49.5        | 3.40 | 0.43 | 1.84      | 2.14         | 3.40         | 775940<br>778170<br>778670<br>779000<br>779180<br>779400<br>781115 | 9977410 | 13.9             | 50.2<br>25.8<br>23.6<br>21.5<br>23.7<br>25.9<br>50.0 | MB<br>B<br>B<br>B<br>B<br>B<br>M  |                               | 134<br>20<br>10<br>0<br>0<br>10<br>20<br>133 | 770300<br>-36<br>-10<br>-4<br>0<br>2<br>5<br>24 |                       |
| 2.73<br>3.04<br>3.09<br>3.25<br>3.42<br>3.50<br>4.65 |             |             |      |      |           |              |              |                                                                    |         |                  | 50.1<br>27.1<br>25.0<br>22.5<br>25.1<br>27.1<br>50.0 | MB<br>B<br>B<br>B<br>B<br>B<br>MB |                               | 122<br>11<br>0<br>11<br>21<br>122            | -16<br>-7<br>-5<br>0<br>5<br>8<br>43            |                       |
| 4.17<br>5.00<br>5.13<br>5.37<br>5.63<br>5.91<br>8.00 |             |             |      |      |           |              |              |                                                                    |         |                  | 50.0<br>25.8<br>23.6<br>21.5<br>23.9<br>25.7<br>50.0 | MB<br>B<br>B<br>B<br>B<br>B<br>MB |                               | 133<br>20<br>10<br>0<br>11<br>20<br>133      | -22<br>-7<br>-4<br>0<br>5<br>10<br>49           |                       |
| 3.25                                                 | 5.37        | 49.5        | 3.40 | 0.43 | 1.84      | 2.14         | 3.40         | 779000                                                             | 9977410 | 13.9             | 50.0<br>25.8<br>23.6<br>21.5<br>23.6<br>25.8<br>50.1 | M<br>B<br>B<br>B<br>B<br>B<br>M   |                               | 133<br>20<br>10<br>0<br>10<br>20<br>133      | -32<br>-9<br>-6<br>0<br>6<br>13<br>88           |                       |
| 3.25                                                 | 5.37        | 49.5        | 3.40 | 0.43 | 1.84      | 2.14         | 3.40         | 779000                                                             | 9977410 | 13.9             | 50.0<br>25.8<br>23.6<br>21.5<br>23.7<br>25.8<br>49.9 | MB<br>B<br>B<br>B<br>B<br>B<br>M  |                               | 133<br>20<br>10<br>0<br>10<br>20<br>132      | -40<br>-12<br>-6<br>0<br>10<br>15<br>90         |                       |

CUADRO N°: C3.a



ANÁLISIS DE SENSIBILIDAD DE MODELO "TORMENTA" PARA LA TORMENTA REGISTRADA EL 7 DE DICIEMBRE DE 1982

| ANÁLISIS DE SENSIBILIDAD DE MODELO TORMENTA PARA LA TORMENTA REGISTRADA EL 10 DE AGOSTO DE 1996 |      |             |      |      |           |              |              |    |    |                  |                     |                      |
|-------------------------------------------------------------------------------------------------|------|-------------|------|------|-----------|--------------|--------------|----|----|------------------|---------------------|----------------------|
| Gráfico 1                                                                                       |      |             |      |      |           |              |              |    |    | Gráfico 2        |                     |                      |
| DUR<br>(h)                                                                                      | K    | PRE<br>(mm) | n    | ΔI   | TD<br>(h) | Vx<br>(km/h) | Vy<br>(km/h) | Cx | Cy | H(hora<br>Local) | Número<br>de ajuste | Valor<br>Cualitativo |
| 3.25                                                                                            | 5.37 | 49.5        | 3.40 | 0.43 | 0.60      |              |              |    |    |                  |                     | MB                   |
|                                                                                                 |      |             |      |      | 1.53      |              |              |    |    |                  | 49.9                | B                    |
|                                                                                                 |      |             |      |      | 1.65      |              |              |    |    |                  | 25.7                | B                    |
|                                                                                                 |      |             |      |      | 1.84      |              |              |    |    | 13.9             | 23.5                | B                    |
|                                                                                                 |      |             |      |      | 2.01      |              |              |    |    | 23.7             | B                   |                      |
| 3.25                                                                                            | 5.37 | 49.5        | 3.40 | 0.43 | 2.09      |              |              |    |    |                  | 25.8                | B                    |
|                                                                                                 |      |             |      |      | 2.70      |              |              |    |    |                  | 50.0                | B                    |
|                                                                                                 |      |             |      |      |           |              |              |    |    |                  |                     | MB                   |
|                                                                                                 |      |             |      |      |           |              |              |    |    |                  |                     | B                    |
|                                                                                                 |      |             |      |      |           |              |              |    |    |                  |                     | B                    |
| 3.25                                                                                            | 5.37 | 49.5        | 3.40 | 0.43 | 1.84      |              |              |    |    |                  |                     | MB                   |
|                                                                                                 |      |             |      |      |           |              |              |    |    |                  | 50.0                | B                    |
|                                                                                                 |      |             |      |      |           |              |              |    |    |                  | 25.8                | B                    |
|                                                                                                 |      |             |      |      |           |              |              |    |    |                  | 23.5                | B                    |
|                                                                                                 |      |             |      |      |           |              |              |    |    |                  | 23.6                | B                    |
| 3.25                                                                                            | 5.37 | 49.5        | 3.40 | 0.43 | 4.27      |              |              |    |    |                  | 24.9                | B                    |
|                                                                                                 |      |             |      |      | 6.25      |              |              |    |    |                  | 49.8                | M                    |
|                                                                                                 |      |             |      |      |           |              |              |    |    |                  |                     | MB                   |
|                                                                                                 |      |             |      |      |           |              |              |    |    |                  |                     | B                    |
|                                                                                                 |      |             |      |      |           |              |              |    |    |                  |                     | B                    |
| 3.25                                                                                            | 5.37 | 49.5        | 3.40 | 0.43 | 1.84      |              |              |    |    |                  |                     | MB                   |
|                                                                                                 |      |             |      |      |           |              |              |    |    |                  | 50.0                | B                    |
|                                                                                                 |      |             |      |      |           |              |              |    |    |                  | 22.5                | B                    |
|                                                                                                 |      |             |      |      |           |              |              |    |    |                  | 24.8                | B                    |
|                                                                                                 |      |             |      |      |           |              |              |    |    |                  | 27.0                | B                    |
| 3.25                                                                                            | 5.37 | 49.5        | 3.40 | 0.43 | 3.04      |              |              |    |    |                  |                     | MB                   |
|                                                                                                 |      |             |      |      | 4.75      |              |              |    |    |                  | 50.0                | B                    |
|                                                                                                 |      |             |      |      |           |              |              |    |    |                  |                     | MB                   |
|                                                                                                 |      |             |      |      |           |              |              |    |    |                  |                     | B                    |
|                                                                                                 |      |             |      |      |           |              |              |    |    |                  |                     | B                    |
| 3.25                                                                                            | 5.37 | 49.5        | 3.40 | 0.43 | 1.84      |              |              |    |    |                  |                     | MB                   |
|                                                                                                 |      |             |      |      |           |              |              |    |    |                  | 50.0                | B                    |
|                                                                                                 |      |             |      |      |           |              |              |    |    |                  | 22.5                | B                    |
|                                                                                                 |      |             |      |      |           |              |              |    |    |                  | 24.8                | B                    |
|                                                                                                 |      |             |      |      |           |              |              |    |    |                  | 27.0                | B                    |
| 3.25                                                                                            | 5.37 | 49.5        | 3.40 | 0.43 | 2.86      |              |              |    |    |                  |                     | MB                   |
|                                                                                                 |      |             |      |      | 3.16      |              |              |    |    |                  | 50.0                | B                    |
|                                                                                                 |      |             |      |      |           |              |              |    |    |                  |                     | MB                   |
|                                                                                                 |      |             |      |      |           |              |              |    |    |                  |                     | B                    |
|                                                                                                 |      |             |      |      |           |              |              |    |    |                  |                     | B                    |
| 3.25                                                                                            | 5.37 | 49.5        | 3.40 | 0.43 | 2.14      |              |              |    |    |                  |                     | MB                   |
|                                                                                                 |      |             |      |      |           |              |              |    |    |                  | 50.0                | B                    |
|                                                                                                 |      |             |      |      |           |              |              |    |    |                  | 22.5                | B                    |
|                                                                                                 |      |             |      |      |           |              |              |    |    |                  | 24.8                | B                    |
|                                                                                                 |      |             |      |      |           |              |              |    |    |                  | 27.0                | B                    |
| 3.25                                                                                            | 5.37 | 49.5        | 3.40 | 0.43 | 2.14      |              |              |    |    |                  |                     | MB                   |
|                                                                                                 |      |             |      |      |           |              |              |    |    |                  | 50.0                | B                    |
|                                                                                                 |      |             |      |      |           |              |              |    |    |                  | 22.5                | B                    |
|                                                                                                 |      |             |      |      |           |              |              |    |    |                  | 24.8                | B                    |
|                                                                                                 |      |             |      |      |           |              |              |    |    |                  | 27.0                | B                    |
| 3.25                                                                                            | 5.37 | 49.5        | 3.40 | 0.43 | 2.01      |              |              |    |    |                  |                     | MB                   |
|                                                                                                 |      |             |      |      |           |              |              |    |    |                  | 50.0                | B                    |
|                                                                                                 |      |             |      |      |           |              |              |    |    |                  | 22.5                | B                    |
|                                                                                                 |      |             |      |      |           |              |              |    |    |                  | 24.8                | B                    |
|                                                                                                 |      |             |      |      |           |              |              |    |    |                  | 27.0                | B                    |
| 3.25                                                                                            | 5.37 | 49.5        | 3.40 | 0.43 | 1.84      |              |              |    |    |                  |                     | MB                   |
|                                                                                                 |      |             |      |      |           |              |              |    |    |                  | 50.0                | B                    |
|                                                                                                 |      |             |      |      |           |              |              |    |    |                  | 22.5                | B                    |
|                                                                                                 |      |             |      |      |           |              |              |    |    |                  | 24.8                | B                    |
|                                                                                                 |      |             |      |      |           |              |              |    |    |                  | 27.0                | B                    |
| 3.25                                                                                            | 5.37 | 49.5        | 3.40 | 0.43 | 1.84      |              |              |    |    |                  |                     | MB                   |
|                                                                                                 |      |             |      |      |           |              |              |    |    |                  | 50.0                | B                    |
|                                                                                                 |      |             |      |      |           |              |              |    |    |                  | 22.5                | B                    |
|                                                                                                 |      |             |      |      |           |              |              |    |    |                  | 24.8                | B                    |
|                                                                                                 |      |             |      |      |           |              |              |    |    |                  | 27.0                | B                    |
| 3.25                                                                                            | 5.37 | 49.5        | 3.40 | 0.43 | 1.84      |              |              |    |    |                  |                     | MB                   |
|                                                                                                 |      |             |      |      |           |              |              |    |    |                  | 50.0                | B                    |
|                                                                                                 |      |             |      |      |           |              |              |    |    |                  | 22.5                | B                    |
|                                                                                                 |      |             |      |      |           |              |              |    |    |                  | 24.8                | B                    |
|                                                                                                 |      |             |      |      |           |              |              |    |    |                  | 27.0                | B                    |
| 3.25                                                                                            | 5.37 | 49.5        | 3.40 | 0.43 | 1.84      |              |              |    |    |                  |                     | MB                   |
|                                                                                                 |      |             |      |      |           |              |              |    |    |                  | 50.0                | B                    |
|                                                                                                 |      |             |      |      |           |              |              |    |    |                  | 22.5                | B                    |
|                                                                                                 |      |             |      |      |           |              |              |    |    |                  | 24.8                | B                    |
|                                                                                                 |      |             |      |      |           |              |              |    |    |                  | 27.0                | B                    |
| 3.25                                                                                            | 5.37 | 49.5        | 3.40 | 0.43 | 1.84      |              |              |    |    |                  |                     | MB                   |
|                                                                                                 |      |             |      |      |           |              |              |    |    |                  | 50.0                | B                    |
|                                                                                                 |      |             |      |      |           |              |              |    |    |                  | 22.5                | B                    |
|                                                                                                 |      |             |      |      |           |              |              |    |    |                  | 24.8                | B                    |
|                                                                                                 |      |             |      |      |           |              |              |    |    |                  | 27.0                | B                    |
| 3.25                                                                                            | 5.37 | 49.5        | 3.40 | 0.43 | 1.84      |              |              |    |    |                  |                     | MB                   |
|                                                                                                 |      |             |      |      |           |              |              |    |    |                  | 50.0                | B                    |
|                                                                                                 |      |             |      |      |           |              |              |    |    |                  | 22.5                | B                    |
|                                                                                                 |      |             |      |      |           |              |              |    |    |                  | 24.8                | B                    |
|                                                                                                 |      |             |      |      |           |              |              |    |    |                  | 27.0                | B                    |
| 3.25                                                                                            | 5.37 | 49.5        | 3.40 | 0.43 | 1.84      |              |              |    |    |                  |                     | MB                   |
|                                                                                                 |      |             |      |      |           |              |              |    |    |                  | 50.0                | B                    |
|                                                                                                 |      |             |      |      |           |              |              |    |    |                  | 22.5                | B                    |
|                                                                                                 |      |             |      |      |           |              |              |    |    |                  | 24.8                | B                    |
|                                                                                                 |      |             |      |      |           |              |              |    |    |                  | 27.0                | B                    |
| 3.25                                                                                            | 5.37 | 49.5        | 3.40 | 0.43 | 1.84      |              |              |    |    |                  |                     | MB                   |
|                                                                                                 |      |             |      |      |           |              |              |    |    |                  | 50.0                | B                    |
|                                                                                                 |      |             |      |      |           |              |              |    |    |                  | 22.5                | B                    |
|                                                                                                 |      |             |      |      |           |              |              |    |    |                  | 24.8                | B                    |
|                                                                                                 |      |             |      |      |           |              |              |    |    |                  | 27.0                | B                    |
| 3.25                                                                                            | 5.37 | 49.5        | 3.40 | 0.43 | 1.84      |              |              |    |    |                  |                     | MB                   |
|                                                                                                 |      |             |      |      |           |              |              |    |    |                  | 50.0                | B                    |
|                                                                                                 |      |             |      |      |           |              |              |    |    |                  | 22.5                | B                    |
|                                                                                                 |      |             |      |      |           |              |              |    |    |                  | 24.8                | B                    |
|                                                                                                 |      |             |      |      |           |              |              |    |    |                  | 27.0                | B                    |
| 3.25                                                                                            | 5.37 | 49.5        | 3.40 | 0.43 | 1.84      |              |              |    |    |                  |                     | MB                   |
|                                                                                                 |      |             |      |      |           |              |              |    |    |                  | 50.0                | B                    |
|                                                                                                 |      |             |      |      |           |              |              |    |    |                  | 22.5                | B                    |
|                                                                                                 |      |             |      |      |           |              |              |    |    |                  | 24.8                | B                    |
|                                                                                                 |      |             |      |      |           |              |              |    |    |                  | 27.0                | B                    |
| 3.25                                                                                            | 5.37 | 49.5        | 3.40 | 0.43 | 1.84      |              |              |    |    |                  |                     | MB                   |
|                                                                                                 |      |             |      |      |           |              |              |    |    |                  | 50.0                | B                    |
|                                                                                                 |      |             |      |      |           |              |              |    |    |                  | 22.5                | B                    |
|                                                                                                 |      |             |      |      |           |              |              |    |    |                  | 24.8                | B                    |
|                                                                                                 |      |             |      |      |           |              |              |    |    |                  | 27.0                | B                    |
| 3.25                                                                                            | 5.37 | 49.5        | 3.40 | 0.43 | 1.84      |              |              |    |    |                  |                     | MB                   |
|                                                                                                 |      |             |      |      |           |              |              |    |    |                  | 50.0                | B                    |
|                                                                                                 |      |             |      |      |           |              |              |    |    |                  | 22.5                | B                    |
|                                                                                                 |      |             |      |      |           |              |              |    |    |                  | 24.8                | B                    |
|                                                                                                 |      |             |      |      |           |              |              |    |    |                  | 27.0                | B                    |
| 3.25                                                                                            | 5.37 | 49.5        | 3.40 | 0.43 | 1.84      |              |              |    |    |                  |                     | MB                   |
|                                                                                                 |      |             |      |      |           |              |              |    |    |                  | 50.0                | B                    |
|                                                                                                 |      |             |      |      |           |              |              |    |    |                  | 22.5                | B                    |
|                                                                                                 |      |             |      |      |           |              |              |    |    |                  | 24.8                | B                    |
|                                                                                                 |      |             |      |      |           |              |              |    |    |                  | 27.0                | B                    |
| 3.25                                                                                            | 5.37 | 49.5        | 3.40 | 0.43 | 1.84      |              |              |    |    |                  |                     | MB                   |
|                                                                                                 |      |             |      |      |           |              |              |    |    |                  | 50.0                | B                    |
|                                                                                                 |      |             |      |      |           |              |              |    |    |                  | 22.5                | B                    |
|                                                                                                 |      |             |      |      |           |              |              |    |    |                  | 24.8                | B                    |
|                                                                                                 |      |             |      |      |           |              |              |    |    |                  | 27.0                | B                    |
| 3.25                                                                                            | 5.37 | 49.5        | 3.40 | 0.43 | 1.84      |              |              |    |    |                  |                     | MB                   |
|                                                                                                 |      |             |      |      |           |              |              |    |    |                  | 50.0                | B                    |
|                                                                                                 |      |             |      |      |           |              |              |    |    |                  | 22.5                | B                    |
|                                                                                                 |      |             |      |      |           |              |              |    |    |                  | 24.8                | B                    |
|                                                                                                 |      |             |      |      |           |              |              |    |    |                  | 27.0                | B                    |
| 3.25                                                                                            | 5.37 | 49.5        | 3.40 | 0.43 | 1.84      |              |              |    |    |                  |                     | MB                   |
|                                                                                                 |      |             |      |      |           |              |              |    |    |                  | 50.0                | B                    |
|                                                                                                 |      |             |      |      |           |              |              |    |    |                  | 22.5                | B                    |
|                                                                                                 |      |             |      |      |           |              |              |    |    |                  | 24.8                | B                    |
|                                                                                                 |      |             |      |      |           |              |              |    |    |                  | 27.0                | B                    |
| 3.25                                                                                            | 5.37 | 49.5        | 3.40 | 0.43 | 1.84      |              |              |    |    |                  |                     | MB                   |
|                                                                                                 |      |             |      |      |           |              |              |    |    |                  | 50.0                | B                    |
|                                                                                                 |      |             |      |      |           |              |              |    |    |                  | 22.5                | B                    |
|                                                                                                 |      |             |      |      |           |              |              |    |    |                  | 24.8                | B                    |
|                                                                                                 |      |             |      |      |           |              |              |    |    |                  | 27.0                | B                    |
| 3.25                                                                                            | 5.37 | 49.5        | 3.40 | 0.43 | 1.84      |              |              |    |    |                  |                     | MB                   |
|                                                                                                 |      |             |      |      |           |              |              |    |    |                  | 50.0                | B                    |
|                                                                                                 |      |             |      |      |           |              |              |    |    |                  | 22.5                | B                    |
|                                                                                                 |      |             |      |      |           |              |              |    |    |                  | 24.8                | B                    |
|                                                                                                 |      |             |      |      |           |              |              |    |    |                  | 27.0                | B                    |
| 3.25                                                                                            | 5.37 | 49.5        | 3.40 | 0.43 | 1.84      |              |              |    |    |                  |                     | MB                   |
|                                                                                                 |      |             |      |      |           |              |              |    |    |                  | 50.0                | B                    |
|                                                                                                 |      |             |      |      |           |              |              |    |    |                  | 22.5                | B                    |
|                                                                                                 |      |             |      |      |           |              |              |    |    |                  | 24.8                | B                    |
|                                                                                                 |      |             |      |      |           |              |              |    |    |                  | 27.0                | B                    |
| 3.25                                                                                            | 5.37 | 49.5        | 3.40 | 0.43 | 1.84      |              |              |    |    |                  |                     | MB                   |
|                                                                                                 |      |             |      |      |           |              |              |    |    |                  | 50.0                | B                    |
|                                                                                                 |      |             |      |      |           |              |              |    |    |                  | 22.5                | B                    |
|                                                                                                 |      |             |      |      |           |              |              |    |    |                  | 24.8                | B                    |
|                                                                                                 |      |             |      |      |           |              |              |    |    |                  | 27.0                | B                    |
| 3.25                                                                                            | 5.37 | 49.5        | 3.40 | 0.43 | 1.84      |              |              |    |    |                  |                     | MB                   |
|                                                                                                 |      |             |      |      |           |              |              |    |    |                  | 50.0                | B                    |
|                                                                                                 |      |             |      |      |           |              |              |    |    |                  | 22.5                | B                    |
|                                                                                                 |      |             |      |      |           |              |              |    |    |                  | 24.8                | B                    |
|                                                                                                 |      |             |      |      |           |              |              |    |    |                  | 27.0                | B                    |
| 3.25                                                                                            | 5.37 | 49.5        | 3.40 | 0.43 | 1.84      |              |              |    |    |                  |                     | MB                   |
|                                                                                                 |      |             |      |      |           |              |              |    |    |                  | 50.0                | B                    |
|                                                                                                 |      |             |      |      |           |              |              |    |    |                  | 22.5                | B                    |
|                                                                                                 |      |             |      |      |           |              |              |    |    |                  | 24.8                | B                    |
|                                                                                                 |      |             |      |      |           |              |              |    |    |                  | 27.0                | B                    |
| 3.25                                                                                            | 5.37 | 49.5        | 3.40 | 0.43 | 1.84      |              |              |    |    |                  |                     | MB                   |
|                                                                                                 |      |             |      |      |           |              |              |    |    |                  | 50.0                | B                    |
|                                                                                                 |      |             |      |      |           |              |              |    |    |                  | 22.5                | B                    |
|                                                                                                 |      |             |      |      |           |              |              |    |    |                  | 24.8                | B                    |
|                                                                                                 |      |             |      |      |           |              |              |    |    |                  | 27.0                | B                    |
| 3.25                                                                                            | 5.37 | 49.5        | 3.40 | 0.43 | 1.84      |              |              |    |    |                  |                     | MB                   |
|                                                                                                 |      |             |      |      |           |              |              |    |    |                  | 50.0                | B                    |
|                                                                                                 |      |             |      |      |           |              |              |    |    |                  | 22.5                | B                    |
|                                                                                                 |      |             |      |      |           |              |              |    |    |                  | 24.8                | B                    |
|                                                                                                 |      |             |      |      |           |              |              |    |    |                  | 27.0                | B                    |
| 3.25                                                                                            | 5.37 | 49.5        | 3.40 | 0.43 | 1.84      |              |              |    |    |                  |                     | MB                   |
|                                                                                                 |      |             |      |      |           |              |              |    |    |                  | 50.0                | B                    |
|                                                                                                 |      |             |      |      |           |              |              |    |    |                  | 22.5                | B                    |
|                                                                                                 |      |             |      |      |           |              |              |    |    |                  | 24.8                | B                    |
|                                                                                                 |      |             |      |      |           |              |              |    |    |                  | 27.0                | B                    |
| 3.25                                                                                            | 5.37 | 49.5        | 3.40 | 0.43 | 1.84      |              |              |    |    |                  |                     | MB                   |
|                                                                                                 |      |             |      |      |           |              |              |    |    |                  | 50.0                | B                    |
|                                                                                                 |      |             |      |      |           |              |              |    |    |                  | 22.5                | B                    |
|                                                                                                 |      |             |      |      |           |              |              |    |    |                  | 24.8                | B                    |
|                                                                                                 |      |             |      |      |           |              |              |    |    |                  | 27.0                | B                    |
| 3.25                                                                                            | 5.37 | 49.5        | 3.40 | 0.43 | 1.84      |              |              |    |    |                  |                     | MB                   |
|                                                                                                 |      |             |      |      |           |              |              |    |    |                  | 50.0                | B                    |
|                                                                                                 |      |             |      |      |           |              |              |    |    |                  | 22.5                | B                    |
|                                                                                                 |      |             |      |      |           |              |              |    |    |                  | 24.8                | B                    |
|                                                                                                 |      |             |      |      |           |              |              |    |    |                  | 27.0                | B                    |
| 3.25                                                                                            | 5.37 | 49.5        | 3.40 | 0.43 | 1.84      |              |              |    |    |                  |                     | MB                   |
|                                                                                                 |      |             |      |      |           |              |              |    |    |                  | 50.0                | B                    |
|                                                                                                 |      |             |      |      |           |              |              |    |    |                  | 22.5                | B                    |
|                                                                                                 |      |             |      |      |           |              |              |    |    |                  | 24.8                | B                    |
|                                                                                                 |      |             |      |      |           |              |              |    |    |                  | 27.0                | B                    |
| 3.25                                                                                            | 5.37 | 49.5        | 3.40 | 0.43 | 1.84      |              |              |    |    |                  |                     | MB                   |
|                                                                                                 |      |             |      |      |           |              |              |    |    |                  | 50.0                | B                    |
|                                                                                                 |      |             |      |      |           |              |              |    |    |                  | 22.5                | B                    |
|                                                                                                 |      |             |      |      |           |              |              |    |    |                  | 24.8                | B                    |
|                                                                                                 |      |             |      |      |           |              |              |    |    |                  | 27.0                | B                    |
| 3.25                                                                                            | 5.37 | 49.5        | 3.40 | 0.43 | 1.84      |              |              |    |    |                  |                     | MB                   |
|                                                                                                 |      |             |      |      |           |              |              |    |    |                  | 50.0                | B                    |
|                                                                                                 |      |             |      |      |           |              |              |    |    |                  | 22.5                | B                    |
|                                                                                                 |      |             |      |      |           |              |              |    |    |                  | 24.8                | B                    |
|                                                                                                 |      |             |      |      |           |              |              |    |    |                  | 27.0                | B                    |
| 3.25                                                                                            | 5.37 | 49.5        | 3.40 | 0.43 | 1.84      |              |              |    |    |                  |                     | MB                   |
|                                                                                                 |      |             |      |      |           |              |              |    |    |                  | 50.0                | B                    |
|                                                                                                 |      |             |      |      |           |              |              |    |    |                  | 22.5                | B                    |
|                                                                                                 |      |             |      |      |           |              |              |    |    |                  | 24.8                | B                    |
|                                                                                                 |      |             |      |      |           |              |              |    |    |                  | 27.0                | B                    |
| 3.25                                                                                            | 5.37 | 49.5        | 3.40 | 0.43 | 1.84      |              |              |    |    |                  |                     | MB                   |
|                                                                                                 |      |             |      |      |           |              |              |    |    |                  | 50.0                | B                    |
|                                                                                                 |      |             |      |      |           |              |              |    |    |                  | 22.5                | B                    |
|                                                                                                 |      |             |      |      |           |              |              |    |    |                  | 24.8                | B                    |
|                                                                                                 |      |             |      |      |           |              |              |    |    |                  | 27.0                | B                    |
| 3.25                                                                                            | 5.37 | 49.5        | 3.40 | 0.43 | 1.84      |              |              |    |    |                  |                     | MB                   |
|                                                                                                 |      |             |      |      |           |              |              |    |    |                  | 50.0                | B                    |
|                                                                                                 |      |             |      |      |           |              |              |    |    |                  | 22.5                | B                    |
|                                                                                                 |      |             |      |      |           |              |              |    |    |                  | 24.8                | B                    |
|                                                                                                 |      |             |      |      |           |              |              |    |    |                  | 27.0                | B                    |
| 3.25                                                                                            | 5.37 | 49.5        | 3.40 | 0.43 | 1.84      |              |              |    |    |                  |                     | MB                   |
|                                                                                                 |      |             |      |      |           |              |              |    |    |                  | 50.0                | B                    |
|                                                                                                 |      |             |      |      |           |              |              |    |    |                  | 22.5                | B                    |
|                                                                                                 |      |             |      |      |           |              |              |    |    |                  | 24.8                | B                    |
|                                                                                                 |      |             |      |      |           |              |              |    |    |                  | 27.0                | B                    |

## **ANEXO D**

### **REPORTE GRAFICO DE AJUSTE DE TORMENTAS**



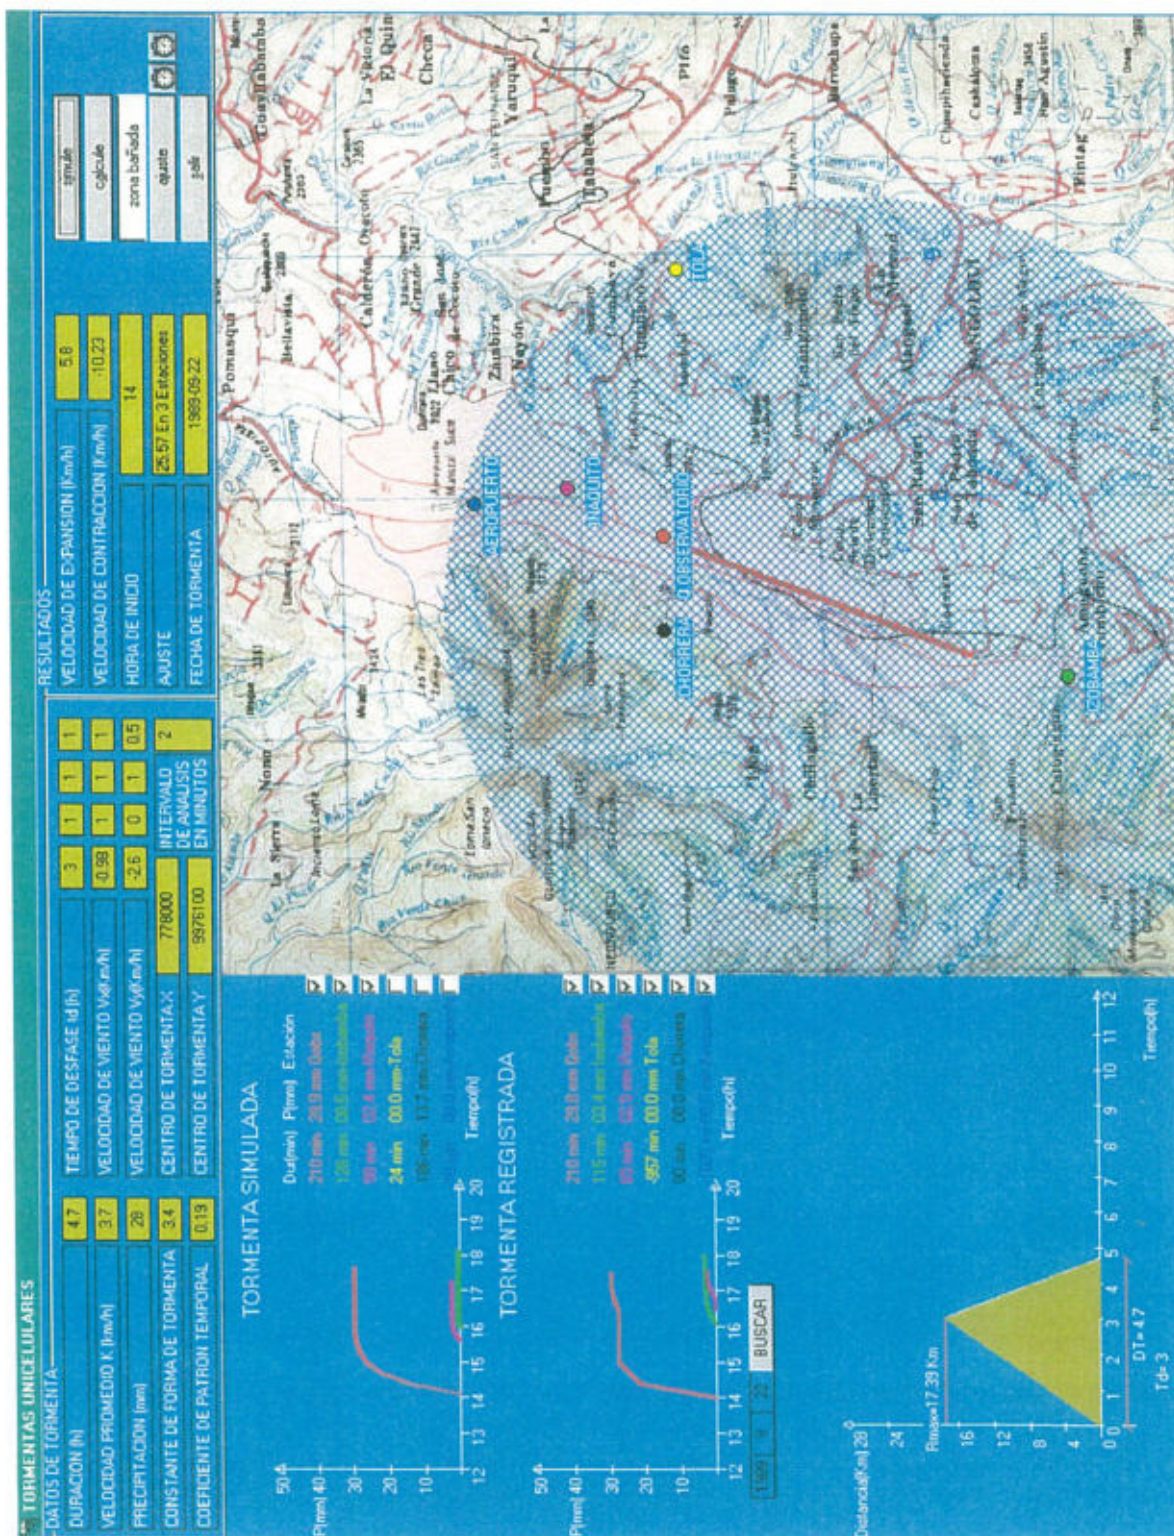

FIGURA D1.- TORMENTA :1989/09/22



















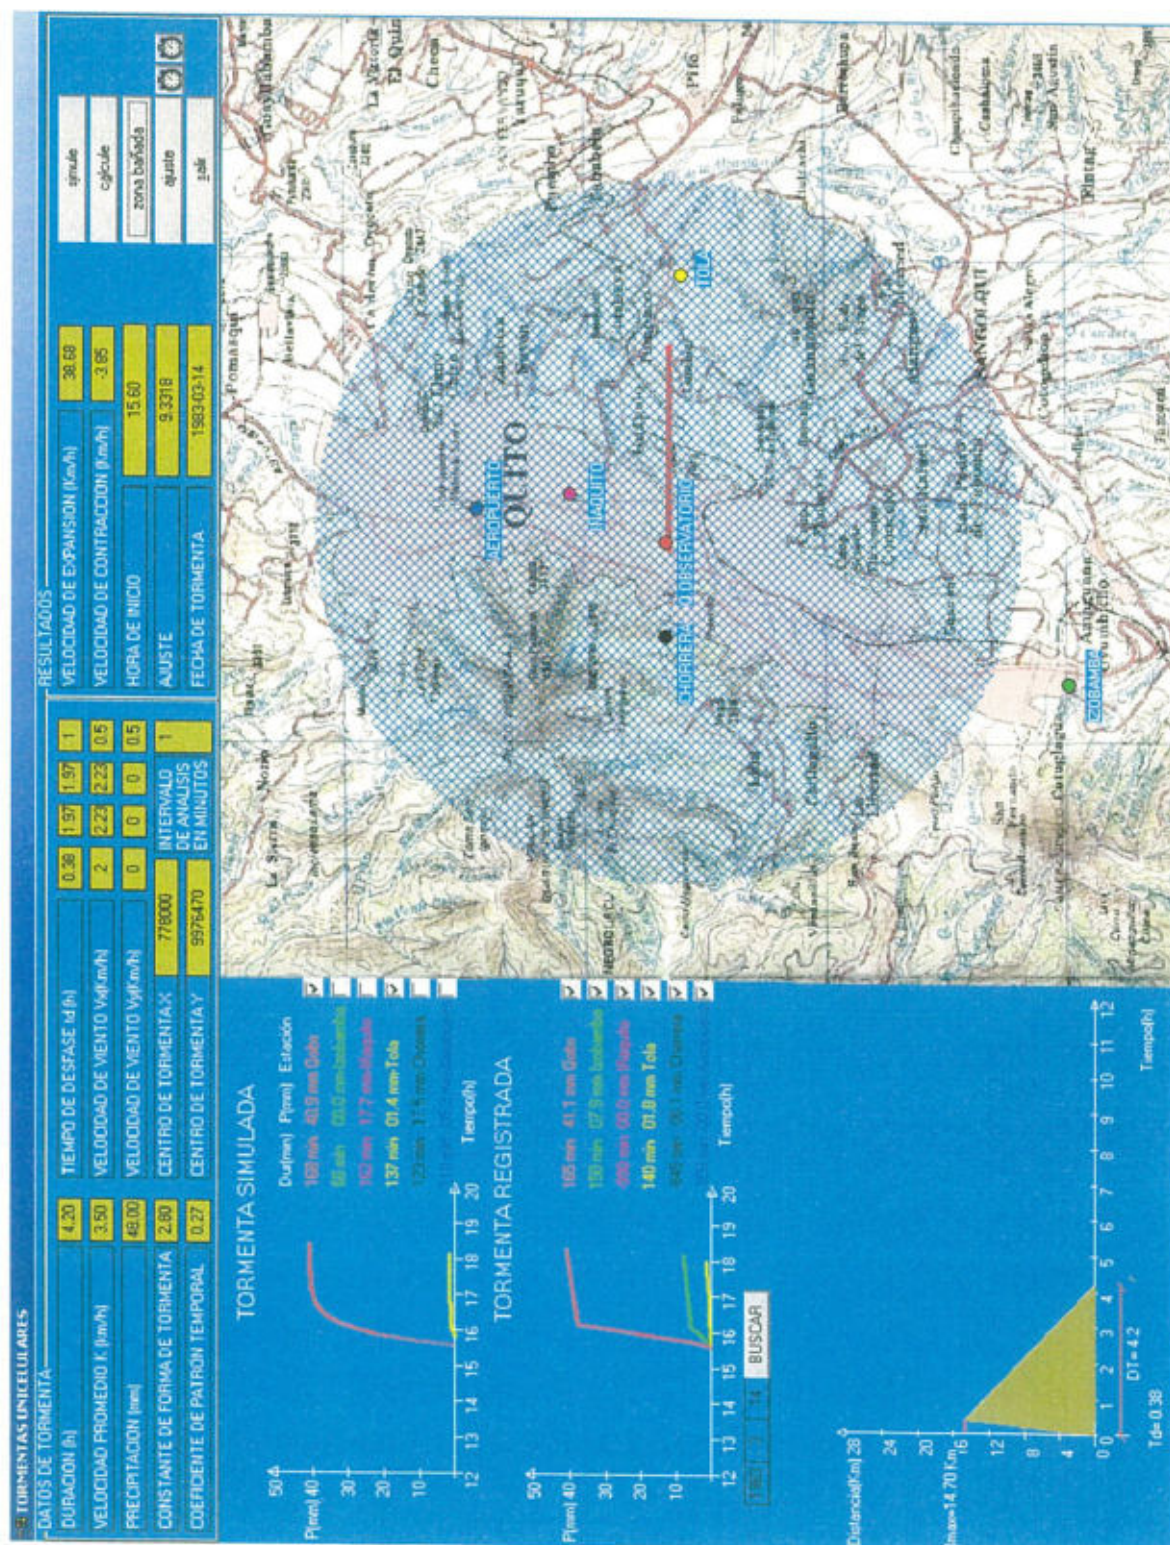

FIGURA D6.- TORMENTA :1983/03/14











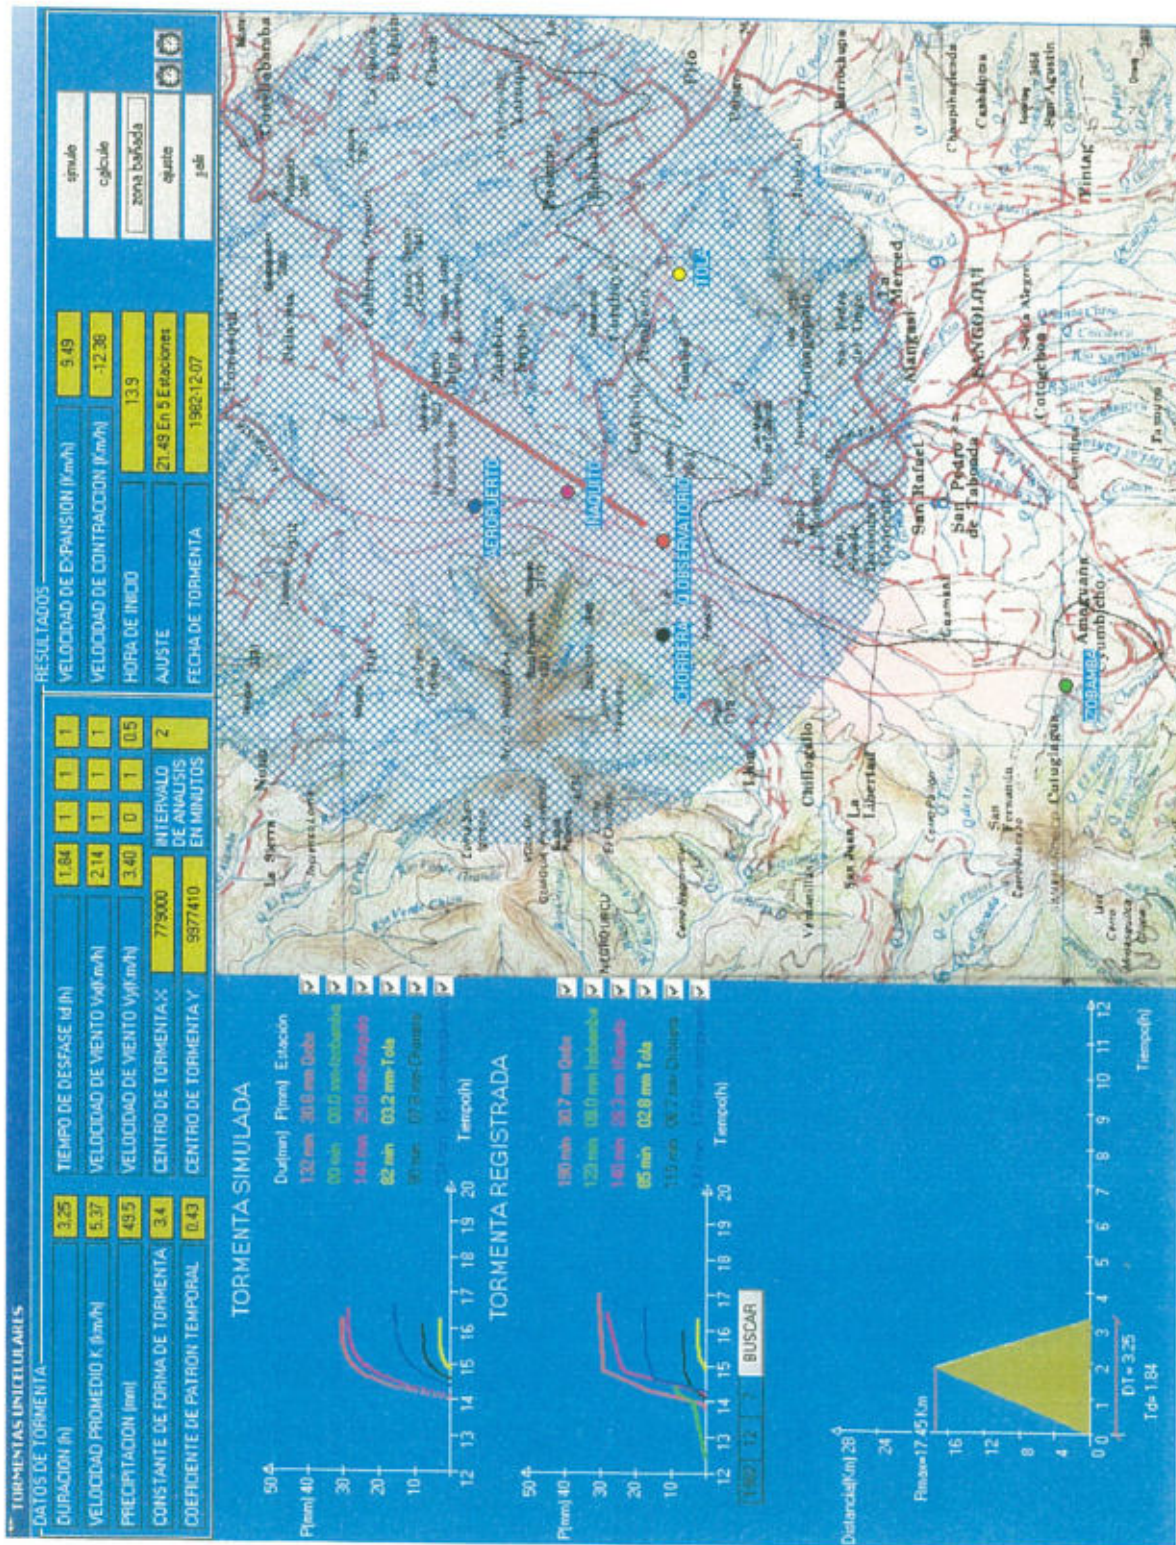

FIGURA D9.- TORMENTA :1982/12/07



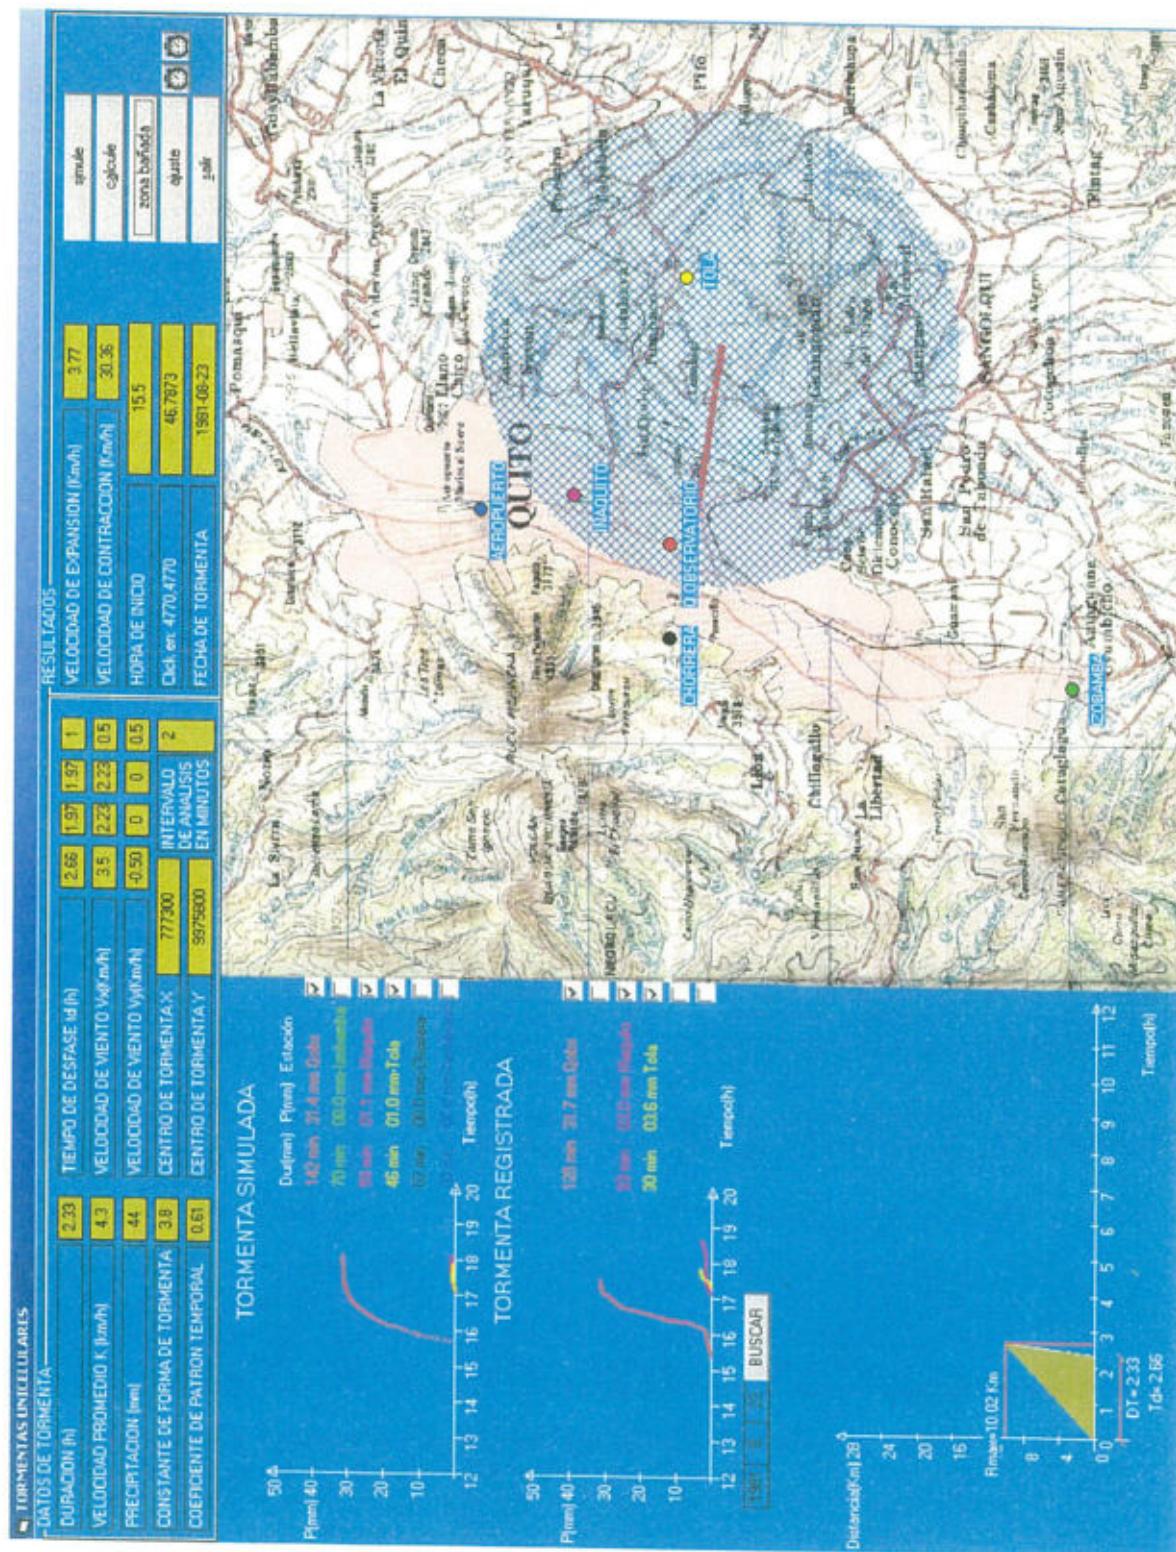











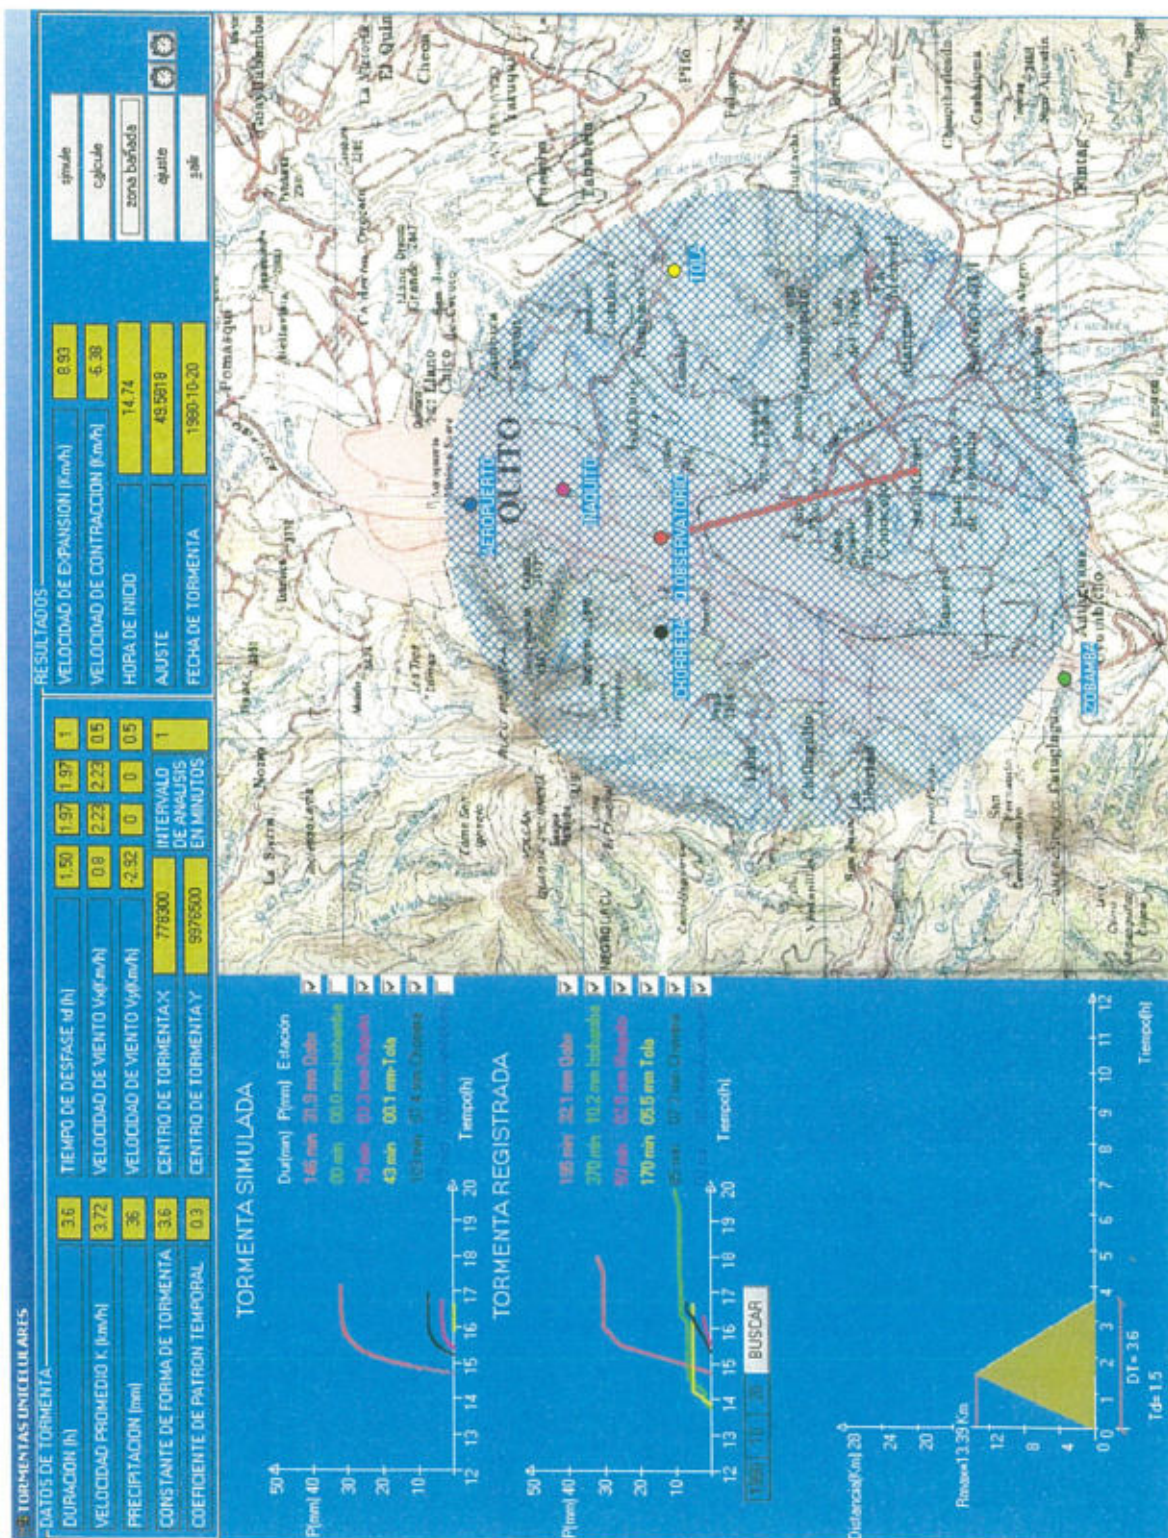

FIGURA D13.- TORMENTA :1980/10/20



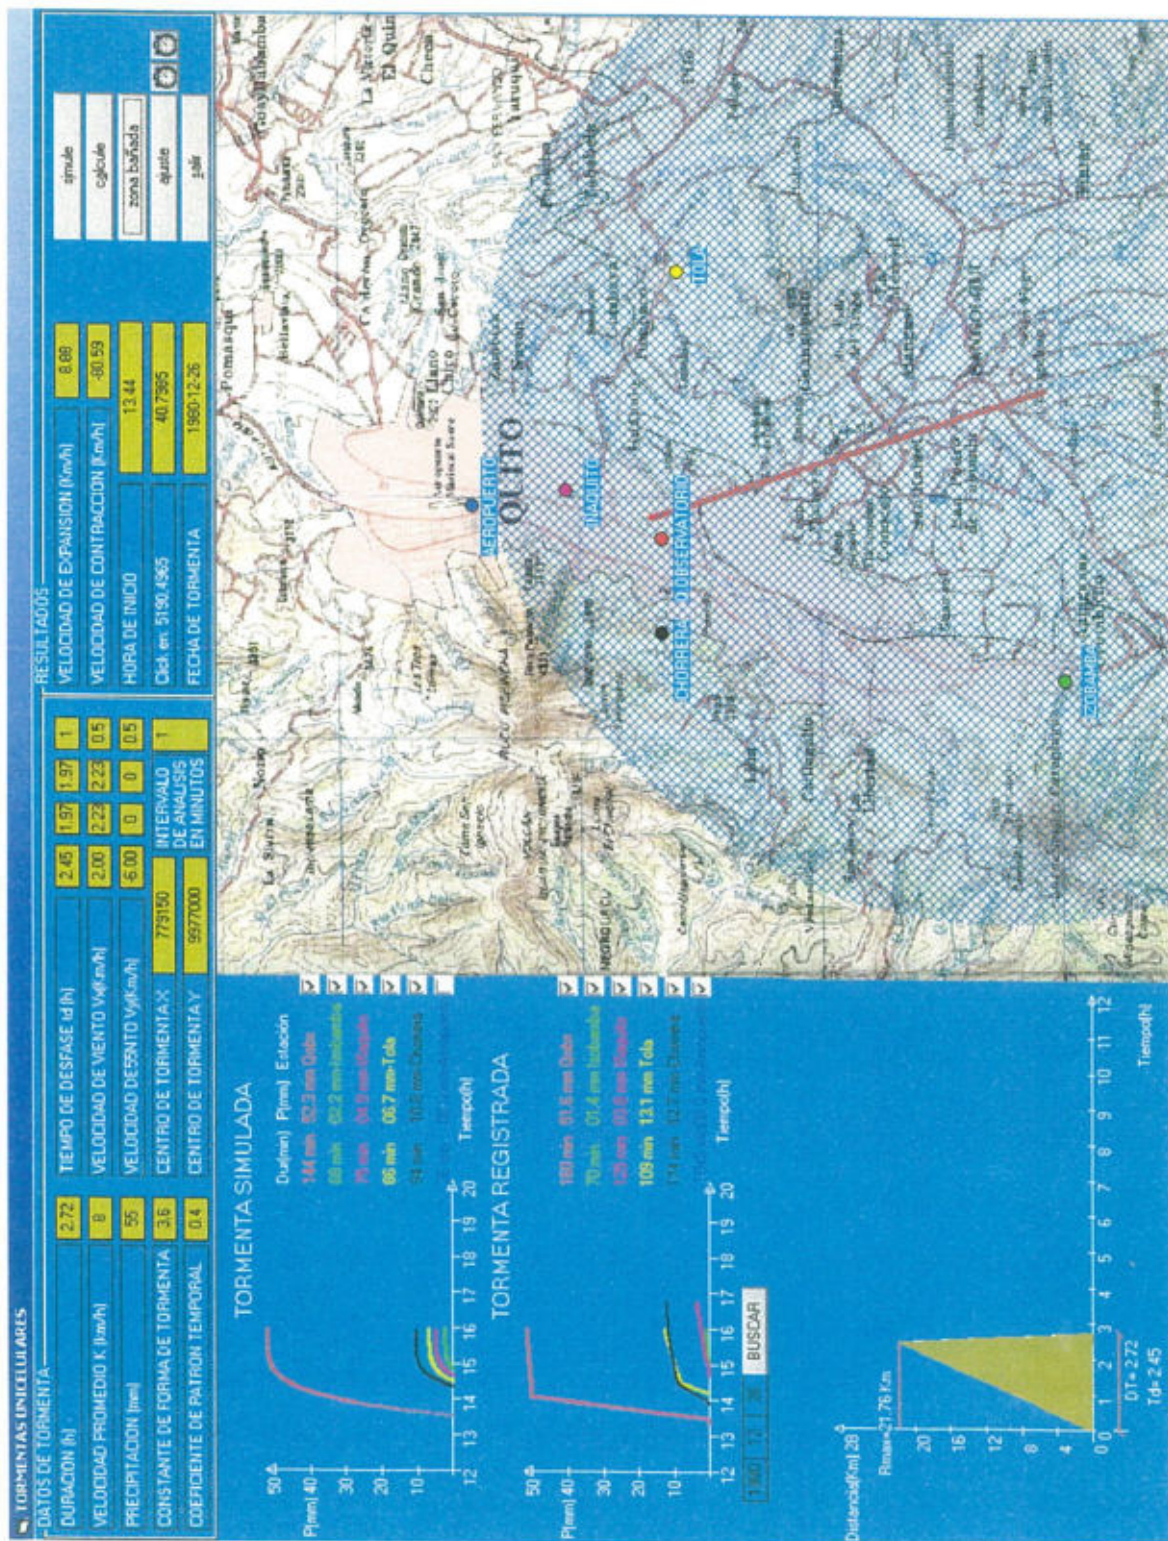

FIGURA D14.- TORRENTA :1980/12/26



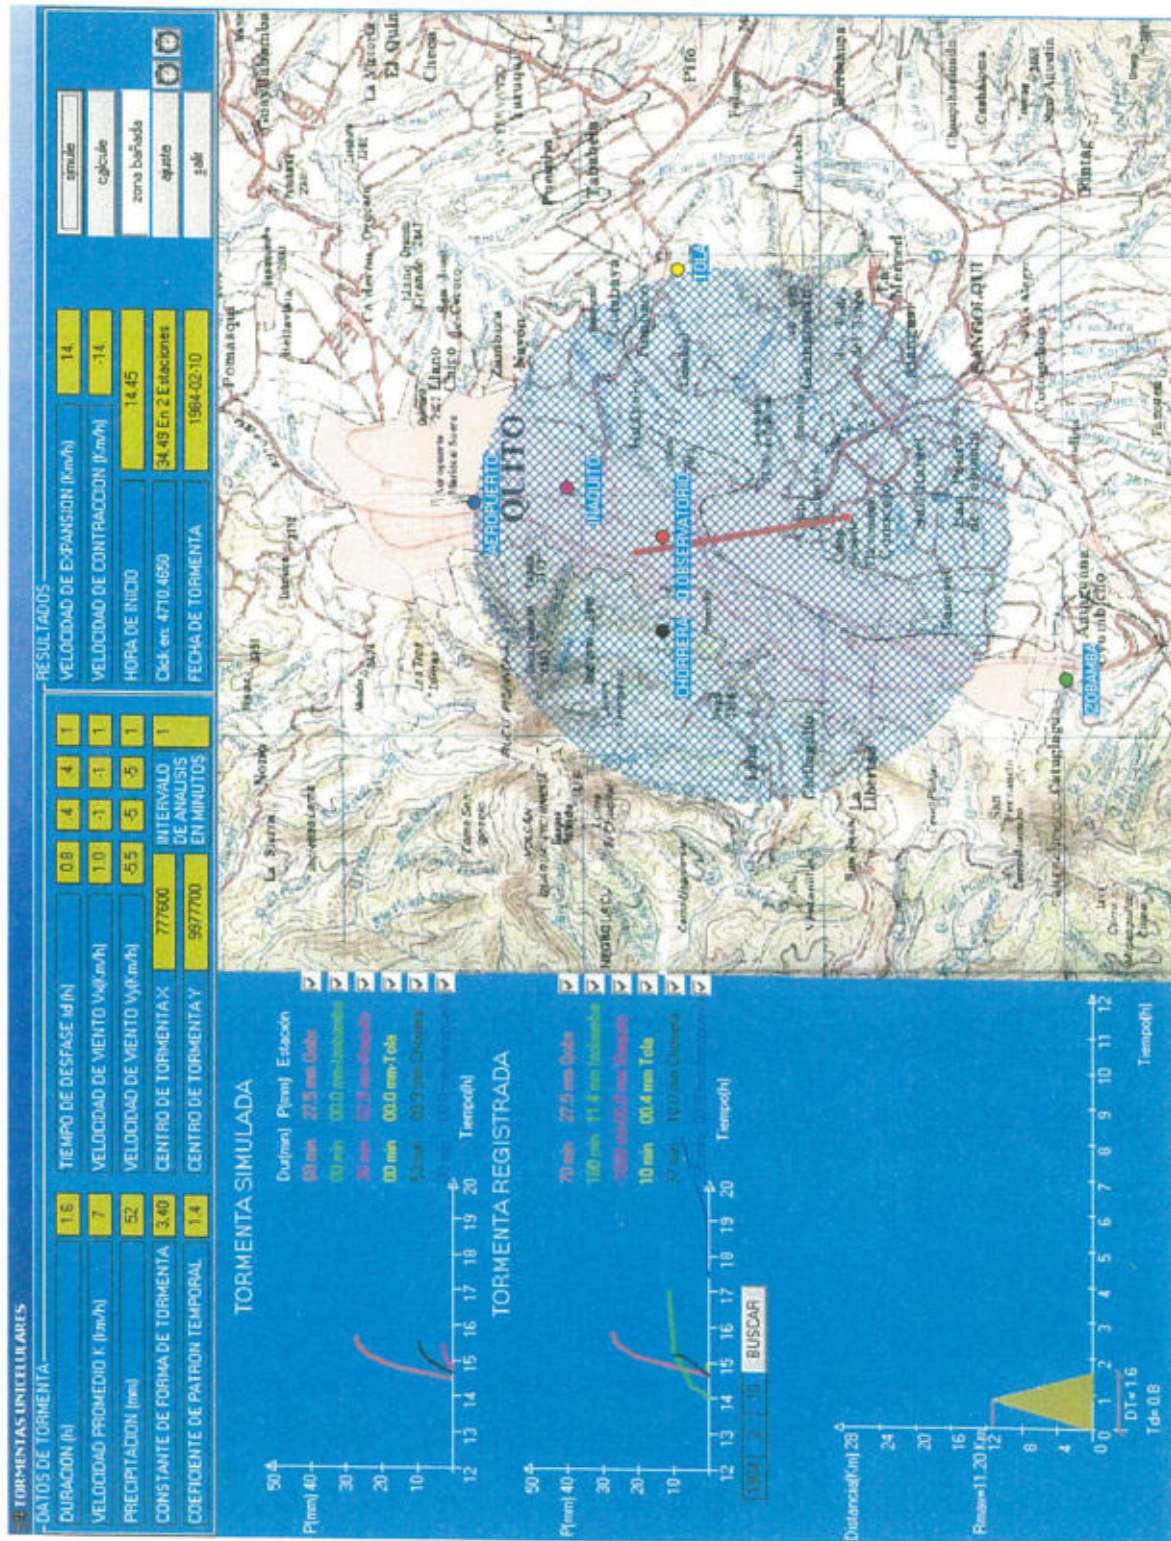

FIGURA D15.- TORMENTA :1984/02/10



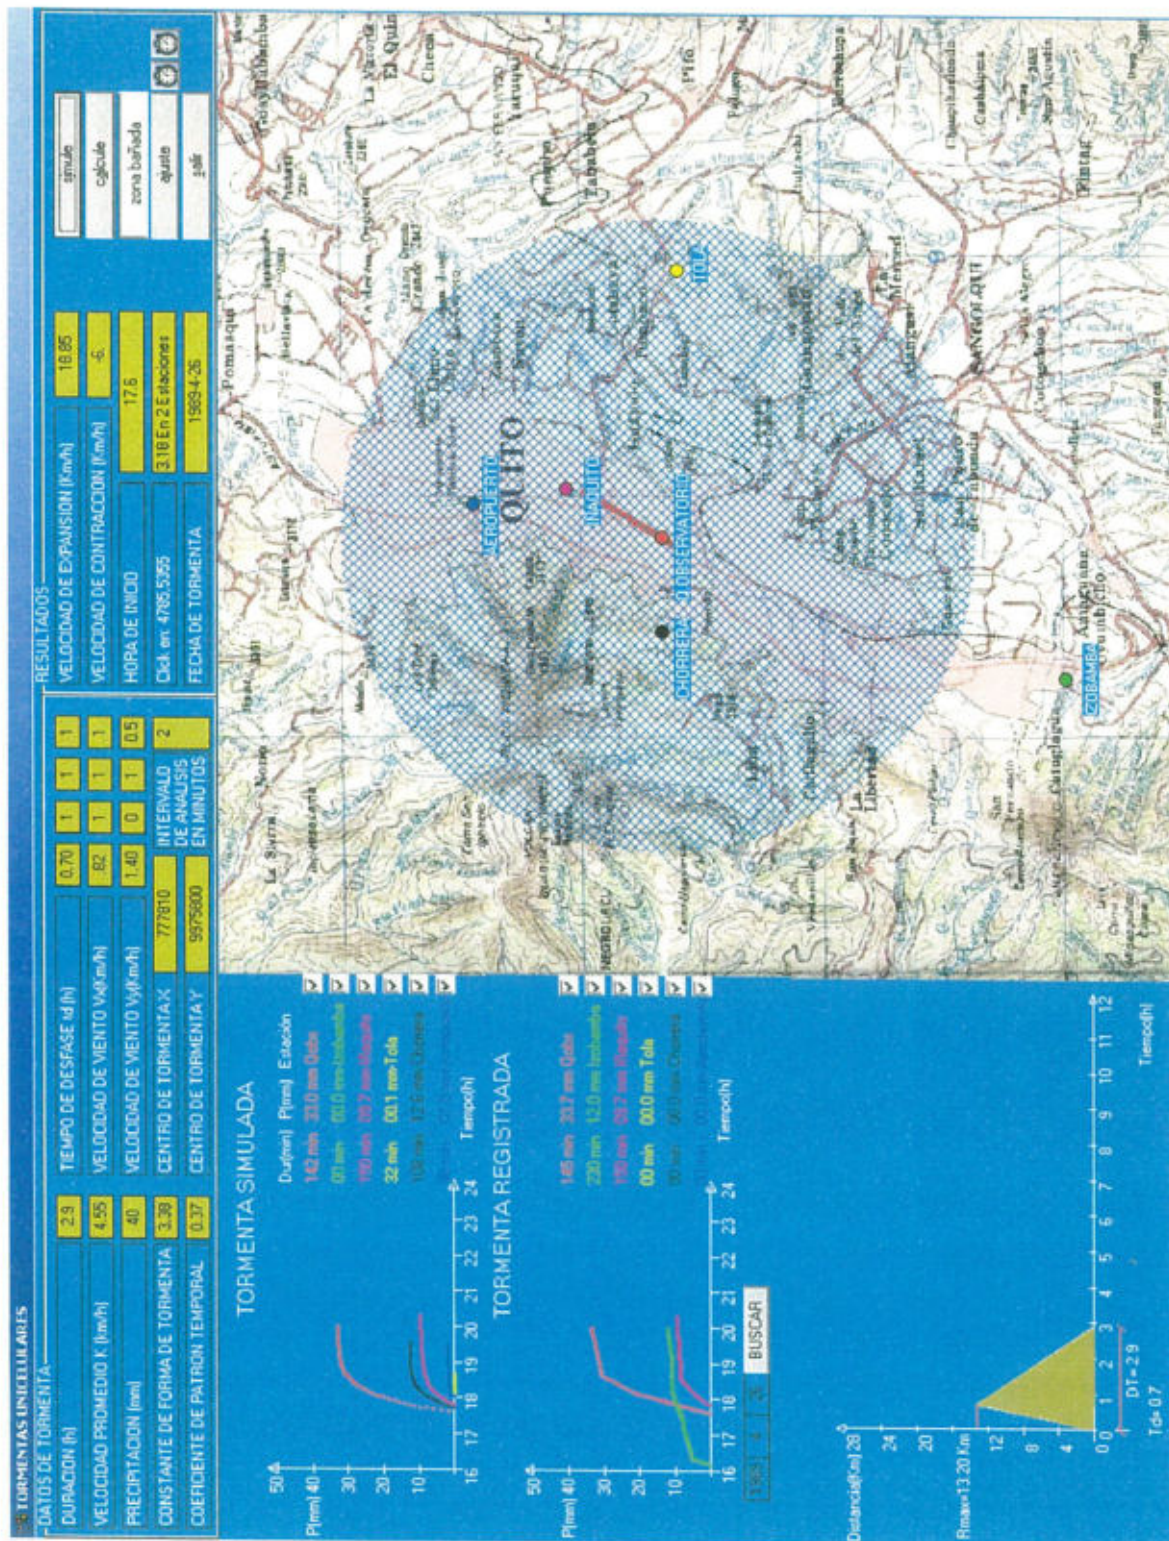

FIGURA D16.- TORMENTA :1989/04/26

## **ANEXO E**

### **CALCULO DE LA DISMINUCIÓN DE LA PRECIPITACIÓN MEDIA CON EL AUMENTO DEL AREA DE TORMENTA**



# REGISTRO DE TORMENTAS CALCULO DE LA PRECIPITACION MEDIA

Tormenta: 1

fecha: 1989 9 22

Duración: 4.7 horas

| Pre.min<br>(mm) | Pre.max<br>(mm) | Pre. promedio<br>(mm) | Nceldas | Nceldas<br>acumuladas | Precipitación(mm)<br>Promedio acumulada | % precipiación<br>total | Area Acumulada<br>km <sup>2</sup> |
|-----------------|-----------------|-----------------------|---------|-----------------------|-----------------------------------------|-------------------------|-----------------------------------|
| 0.25            | 2.65            | 1.45                  | 24409   | 47868                 | 4.77                                    | 15                      | 478.7                             |
| 2.65            | 5.30            | 3.97                  | 9547    | 23459                 | 8.23                                    | 26                      | 234.6                             |
| 5.30            | 7.95            | 6.62                  | 5031    | 13912                 | 11.15                                   | 35                      | 139.1                             |
| 7.95            | 10.60           | 9.27                  | 3139    | 8881                  | 13.71                                   | 43                      | 88.8                              |
| 10.60           | 13.25           | 11.92                 | 2064    | 5742                  | 16.14                                   | 51                      | 57.4                              |
| 13.25           | 15.89           | 14.57                 | 1343    | 3678                  | 18.50                                   | 58                      | 36.8                              |
| 15.89           | 18.54           | 17.22                 | 912     | 2335                  | 20.76                                   | 65                      | 23.4                              |
| 18.54           | 21.19           | 19.87                 | 559     | 1423                  | 23.03                                   | 72                      | 14.2                              |
| 21.19           | 23.84           | 22.52                 | 382     | 864                   | 25.08                                   | 79                      | 8.6                               |
| 23.84           | 26.49           | 25.17                 | 224     | 482                   | 27.11                                   | 85                      | 4.8                               |
| 26.49           | 29.14           | 27.81                 | 162     | 258                   | 28.81                                   | 91                      | 2.6                               |
| 29.14           | 31.79           | 30.46                 | 95      | 96                    | 30.48                                   | 96                      | 1.0                               |
| 31.79           |                 | 31.79                 | 1       | 1                     | 31.79                                   | 100                     | 0                                 |

Nota: Tamaño de la celda 100 x 100 m

Tormenta: 2

fecha: 1986 4 9

Duración: 5.5 horas

| Pre.min<br>(mm) | Pre.max<br>(mm) | Pre. promedio<br>(mm) | Nceldas | Nceldas<br>acumuladas | Precipitación(mm)<br>Promedio acumulada | % precipiación<br>total | Area Acumulada<br>km <sup>2</sup> |
|-----------------|-----------------|-----------------------|---------|-----------------------|-----------------------------------------|-------------------------|-----------------------------------|
| 0.25            | 2.47            | 1.36                  | 23279   | 74539                 | 7.23                                    | 24                      | 745.4                             |
| 2.47            | 4.94            | 3.70                  | 12639   | 51260                 | 9.89                                    | 33                      | 512.6                             |
| 4.94            | 7.40            | 6.17                  | 10447   | 38621                 | 11.92                                   | 40                      | 386.2                             |
| 7.40            | 9.87            | 8.64                  | 7822    | 28174                 | 14.05                                   | 47                      | 281.7                             |
| 9.87            | 12.34           | 11.11                 | 5735    | 20352                 | 16.12                                   | 54                      | 203.5                             |
| 12.34           | 14.81           | 13.57                 | 4316    | 14617                 | 18.09                                   | 61                      | 146.2                             |
| 14.81           | 17.28           | 16.04                 | 3359    | 10301                 | 19.99                                   | 67                      | 103.0                             |
| 17.28           | 19.74           | 18.51                 | 2394    | 6942                  | 21.90                                   | 74                      | 69.4                              |
| 19.74           | 22.21           | 20.98                 | 1742    | 4548                  | 23.68                                   | 80                      | 45.5                              |
| 22.21           | 24.68           | 23.45                 | 1247    | 2806                  | 25.35                                   | 86                      | 28.1                              |
| 24.68           | 27.15           | 25.91                 | 951     | 1559                  | 26.88                                   | 91                      | 15.6                              |
| 27.15           | 29.62           | 28.38                 | 607     | 608                   | 28.38                                   | 96                      | 6.1                               |
| 29.62           |                 | 29.62                 | 1       | 1                     | 29.62                                   | 100                     | 0                                 |

Nota: Tamaño de la celda 100 x 100 m

CURVA DE DISMINUCION DE LA PRECIPITACION CON EL AUMENTO DEL AREA  
BAÑADA

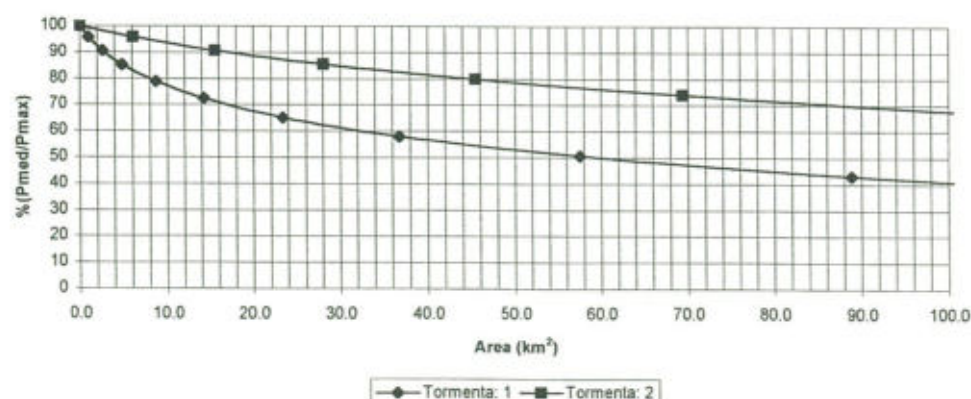

# REGISTRO DE TORMENTAS CALCULO DE LA PRECIPITACION MEDIA

Tormenta: 3

fecha: 1986 11 17

Duración: 1.9 horas

| Pre.min<br>(mm) | Pre.max<br>(mm) | Pre. promedio<br>(mm) | Nceldas | Nceldas<br>acumuladas | Precipitación(mm)<br>Promedio acumulada | % precipiación<br>total | Area Acumulada<br>km <sup>2</sup> |
|-----------------|-----------------|-----------------------|---------|-----------------------|-----------------------------------------|-------------------------|-----------------------------------|
| 0.25            | 4.46            | 2.36                  | 12581   | 20366                 | 7.28                                    | 14                      | 203.7                             |
| 4.46            | 8.93            | 6.70                  | 3011    | 7785                  | 15.22                                   | 28                      | 77.9                              |
| 8.93            | 13.39           | 11.16                 | 1510    | 4774                  | 20.60                                   | 38                      | 47.7                              |
| 13.39           | 17.86           | 15.62                 | 999     | 3264                  | 24.97                                   | 47                      | 32.6                              |
| 17.86           | 22.32           | 20.09                 | 665     | 2265                  | 29.09                                   | 54                      | 22.7                              |
| 22.32           | 26.78           | 24.55                 | 490     | 1600                  | 32.83                                   | 61                      | 16.0                              |
| 26.78           | 31.25           | 29.02                 | 363     | 1110                  | 36.49                                   | 68                      | 11.1                              |
| 31.25           | 35.71           | 33.48                 | 234     | 747                   | 40.12                                   | 75                      | 7.5                               |
| 35.71           | 40.18           | 37.94                 | 188     | 513                   | 43.15                                   | 81                      | 5.1                               |
| 40.18           | 44.64           | 42.41                 | 150     | 325                   | 46.16                                   | 86                      | 3.3                               |
| 44.64           | 49.10           | 46.87                 | 77      | 175                   | 49.38                                   | 92                      | 1.8                               |
| 49.10           | 53.57           | 51.34                 | 97      | 98                    | 51.36                                   | 96                      | 1.0                               |
| 53.57           |                 | 53.57                 | 1       | 1                     | 53.57                                   | 100                     | 0                                 |

Nota: Tamaño de la celda 100 x 100 m

Tormenta: 4

fecha: 1986 12 23

Duración: 3.83 horas

| Pre.min<br>(mm) | Pre.max<br>(mm) | Pre. promedio<br>(mm) | Nceldas | Nceldas<br>acumuladas | Precipitación(mm)<br>Promedio acumulada | % precipiación<br>total | Area Acumulada<br>km <sup>2</sup> |
|-----------------|-----------------|-----------------------|---------|-----------------------|-----------------------------------------|-------------------------|-----------------------------------|
| 0.250           | 2.985           | 1.62                  | 16683   | 30710                 | 5.49                                    | 15                      | 307.1                             |
| 2.985           | 5.970           | 4.48                  | 5290    | 14027                 | 10.09                                   | 28                      | 140.3                             |
| 5.970           | 8.955           | 7.46                  | 2761    | 8737                  | 13.48                                   | 38                      | 87.4                              |
| 8.955           | 11.940          | 10.45                 | 1891    | 5976                  | 16.26                                   | 45                      | 59.8                              |
| 11.940          | 14.925          | 13.43                 | 1232    | 4085                  | 18.95                                   | 53                      | 40.9                              |
| 14.925          | 17.910          | 16.42                 | 904     | 2853                  | 21.34                                   | 60                      | 28.5                              |
| 17.910          | 20.895          | 19.40                 | 685     | 1949                  | 23.62                                   | 66                      | 19.5                              |
| 20.895          | 23.880          | 22.39                 | 495     | 1264                  | 25.90                                   | 72                      | 12.6                              |
| 23.880          | 26.865          | 25.37                 | 336     | 769                   | 28.16                                   | 79                      | 7.7                               |
| 26.865          | 29.850          | 28.36                 | 219     | 433                   | 30.33                                   | 85                      | 4.3                               |
| 29.850          | 32.835          | 31.34                 | 143     | 214                   | 32.34                                   | 90                      | 2.1                               |
| 32.835          | 35.820          | 34.33                 | 70      | 71                    | 34.35                                   | 96                      | 0.7                               |
| 35.820          |                 | 35.82                 | 1       | 1                     | 35.82                                   | 100                     | 0                                 |

Nota: Tamaño de la celda 100 x 100 m

CURVA DE DISMINUCION DE LA PRECIPITACION CON EL AUMENTO DEL AREA  
BAÑADA

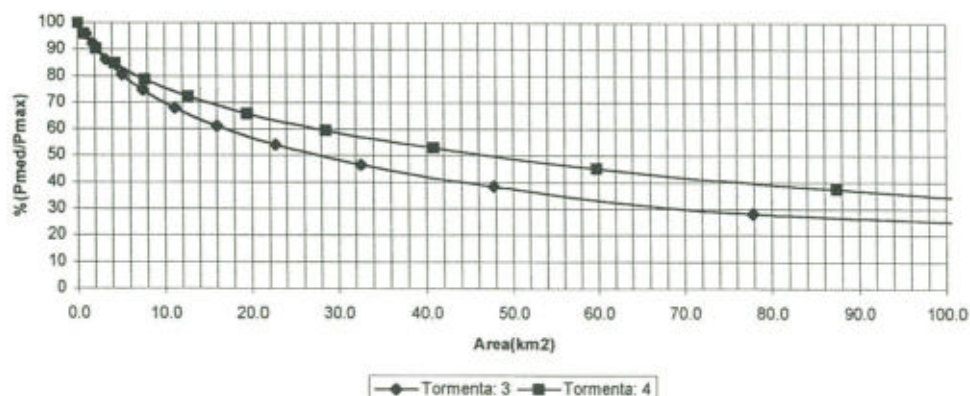



# REGISTRO DE TORMENTAS CALCULO DE LA PRECIPITACION MEDIA

Tormenta: 5  
fecha: 1985 5 5  
Duración: 3 horas

| Pre.min<br>(mm) | Pre.max<br>(mm) | Pre. promedio<br>(mm) | Nceldas | Nceldas<br>acumuladas | Precipitación(mm)<br>Promedio acumulada | % precipiación<br>total | Area Acumulada<br>km <sup>2</sup> |
|-----------------|-----------------|-----------------------|---------|-----------------------|-----------------------------------------|-------------------------|-----------------------------------|
| 0.25            | 3.49            | 1.87                  | 20036   | 31942                 | 4.65                                    | 11                      | 319.4                             |
| 3.49            | 6.97            | 5.23                  | 5763    | 11906                 | 9.34                                    | 22                      | 119.1                             |
| 6.97            | 10.46           | 8.72                  | 2779    | 6143                  | 13.20                                   | 32                      | 61.4                              |
| 10.46           | 13.95           | 12.20                 | 1459    | 3364                  | 16.91                                   | 40                      | 33.6                              |
| 13.95           | 17.44           | 15.69                 | 778     | 1905                  | 20.51                                   | 49                      | 19.1                              |
| 17.44           | 20.92           | 19.18                 | 450     | 1127                  | 23.84                                   | 57                      | 11.3                              |
| 20.92           | 24.41           | 22.67                 | 277     | 677                   | 26.93                                   | 64                      | 6.8                               |
| 24.41           | 27.90           | 26.15                 | 175     | 400                   | 29.89                                   | 71                      | 4.0                               |
| 27.90           | 31.38           | 29.64                 | 103     | 225                   | 32.79                                   | 78                      | 2.3                               |
| 31.38           | 34.87           | 33.13                 | 61      | 122                   | 35.46                                   | 85                      | 1.2                               |
| 34.87           | 38.36           | 36.61                 | 41      | 61                    | 37.79                                   | 90                      | 0.6                               |
| 38.36           | 41.84           | 40.10                 | 19      | 20                    | 40.19                                   | 96                      | 0.2                               |
| 41.84           |                 | 41.84                 | 1       | 1                     | 41.84                                   | 100                     | 0                                 |

Nota: Tamaño de la celda 100 x 100 m

Tormenta: 6  
fecha: 1984 2 16  
Duración: 22.6 horas

| Pre.min<br>(mm) | Pre.max<br>(mm) | Pre. promedio<br>(mm) | Nceldas | Nceldas<br>acumuladas | Precipitación(mm)<br>Promedio acumulada | % precipiación<br>total | Area Acumulada<br>km <sup>2</sup> |
|-----------------|-----------------|-----------------------|---------|-----------------------|-----------------------------------------|-------------------------|-----------------------------------|
| 0.25            | 3.59            | 1.92                  | 26288   | 87105                 | 11.32                                   | 26                      | 871.1                             |
| 3.59            | 7.19            | 5.39                  | 15352   | 60817                 | 15.38                                   | 36                      | 608.2                             |
| 7.19            | 10.78           | 8.99                  | 10999   | 45465                 | 18.75                                   | 43                      | 454.7                             |
| 10.78           | 14.38           | 12.58                 | 8141    | 34466                 | 21.86                                   | 51                      | 344.7                             |
| 14.38           | 17.97           | 16.17                 | 6291    | 26325                 | 24.74                                   | 57                      | 263.3                             |
| 17.97           | 21.56           | 19.77                 | 5001    | 20034                 | 27.43                                   | 64                      | 200.3                             |
| 21.56           | 25.16           | 23.36                 | 4021    | 15033                 | 29.97                                   | 69                      | 150.3                             |
| 25.16           | 28.75           | 26.96                 | 3290    | 11012                 | 32.39                                   | 75                      | 110.1                             |
| 28.75           | 32.35           | 30.55                 | 2754    | 7722                  | 34.70                                   | 80                      | 77.2                              |
| 32.35           | 35.94           | 34.14                 | 2173    | 4968                  | 37.01                                   | 86                      | 49.7                              |
| 35.94           | 39.53           | 37.74                 | 1634    | 2795                  | 39.23                                   | 91                      | 28.0                              |
| 39.53           | 43.13           | 41.33                 | 1160    | 1161                  | 41.33                                   | 96                      | 11.6                              |
| 43.13           |                 | 43.13                 | 1       | 1                     | 43.13                                   | 100                     | 0                                 |

Nota: Tamaño de la celda 100 x 100 m

CURVA DE DISMINUCION DE LA PRECIPITACION CON EL AUMENTO DEL AREA  
BAÑADA

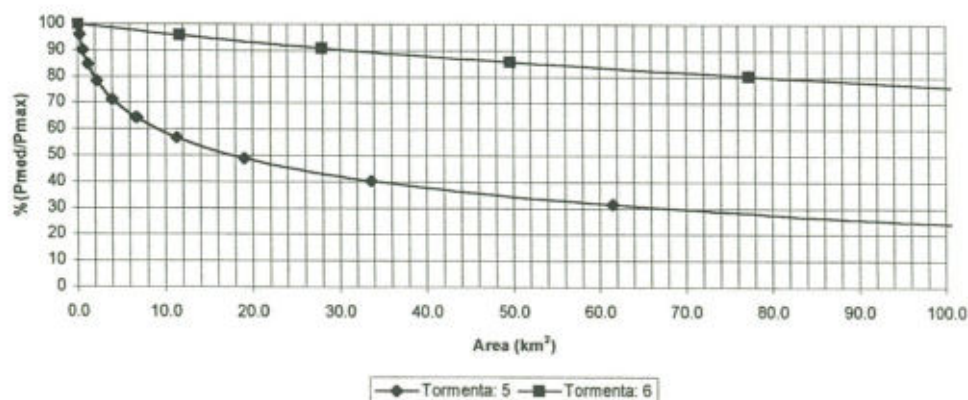

# REGISTRO DE TORMENTAS CALCULO DE LA PRECIPITACION MEDIA

Tormenta: 7

fecha: 1983 3 14

Duración: 4.2 horas

| Pre.min<br>(mm) | Pre.max<br>(mm) | Pre. promedio<br>(mm) | Nceldas | Nceldas<br>acumuladas | Precipitación(mm)<br>Promedio acumulada | % precipiación<br>total | Area Acumulada<br>km <sup>2</sup> |
|-----------------|-----------------|-----------------------|---------|-----------------------|-----------------------------------------|-------------------------|-----------------------------------|
| 0.25            | 3.26            | 1.75                  | 22440   | 48517                 | 7.57                                    | 19                      | 485.2                             |
| 3.26            | 6.51            | 4.88                  | 8240    | 26077                 | 12.58                                   | 32                      | 260.8                             |
| 6.51            | 9.77            | 8.14                  | 4913    | 17837                 | 16.14                                   | 41                      | 178.4                             |
| 9.77            | 13.03           | 11.40                 | 3395    | 12924                 | 19.18                                   | 49                      | 129.2                             |
| 13.03           | 16.28           | 14.65                 | 2499    | 9529                  | 21.95                                   | 56                      | 95.3                              |
| 16.28           | 19.54           | 17.91                 | 1904    | 7030                  | 24.55                                   | 63                      | 70.3                              |
| 19.54           | 22.80           | 21.17                 | 1431    | 5126                  | 27.01                                   | 69                      | 51.3                              |
| 22.80           | 26.05           | 24.42                 | 1149    | 3695                  | 29.27                                   | 75                      | 37.0                              |
| 26.05           | 29.31           | 27.68                 | 888     | 2546                  | 31.46                                   | 81                      | 25.5                              |
| 29.31           | 32.57           | 30.94                 | 729     | 1658                  | 33.49                                   | 86                      | 16.6                              |
| 32.57           | 35.82           | 34.19                 | 560     | 929                   | 35.49                                   | 91                      | 9.3                               |
| 35.82           | 39.08           | 37.45                 | 368     | 369                   | 37.46                                   | 96                      | 3.7                               |
| 39.08           |                 | 39.08                 | 1       | 1                     | 39.08                                   | 100                     | 0                                 |

Nota: Tamaño de la celda 100 x 100 m

Tormenta: 8

fecha: 1982 10 4

Duración: 3.8 horas

| Pre.min<br>(mm) | Pre.max<br>(mm) | Pre. promedio<br>(mm) | Nceldas | Nceldas<br>acumuladas | Precipitación(mm)<br>Promedio acumulada | % precipiación<br>total | Area Acumulada<br>km <sup>2</sup> |
|-----------------|-----------------|-----------------------|---------|-----------------------|-----------------------------------------|-------------------------|-----------------------------------|
| 0.25            | 3.55            | 1.90                  | 9816    | 19752                 | 7.58                                    | 18                      | 197.5                             |
| 3.55            | 7.11            | 5.33                  | 3276    | 9936                  | 13.20                                   | 31                      | 99.4                              |
| 7.11            | 10.66           | 8.89                  | 1936    | 6660                  | 17.07                                   | 40                      | 66.6                              |
| 10.66           | 14.22           | 12.44                 | 1289    | 4724                  | 20.42                                   | 48                      | 47.2                              |
| 14.22           | 17.77           | 15.99                 | 955     | 3435                  | 23.42                                   | 55                      | 34.4                              |
| 17.77           | 21.33           | 19.55                 | 697     | 2480                  | 26.28                                   | 62                      | 24.8                              |
| 21.33           | 24.88           | 23.10                 | 554     | 1783                  | 28.91                                   | 68                      | 17.8                              |
| 24.88           | 28.43           | 26.66                 | 424     | 1229                  | 31.53                                   | 74                      | 12.3                              |
| 28.43           | 31.99           | 30.21                 | 306     | 805                   | 34.09                                   | 80                      | 8.1                               |
| 31.99           | 35.54           | 33.76                 | 235     | 499                   | 36.47                                   | 86                      | 5.0                               |
| 35.54           | 39.10           | 37.32                 | 149     | 264                   | 38.87                                   | 91                      | 2.6                               |
| 39.10           | 42.65           | 40.87                 | 114     | 115                   | 40.89                                   | 96                      | 1.2                               |
| 42.65           |                 | 42.65                 | 1       | 1                     | 42.65                                   | 100                     | 0                                 |

Nota: Tamaño de la celda 100 x 100 m

CURVA DE DISMINUCION DE LA PRECIPITACION CON EL AUMENTO DEL AREA  
BAÑADA

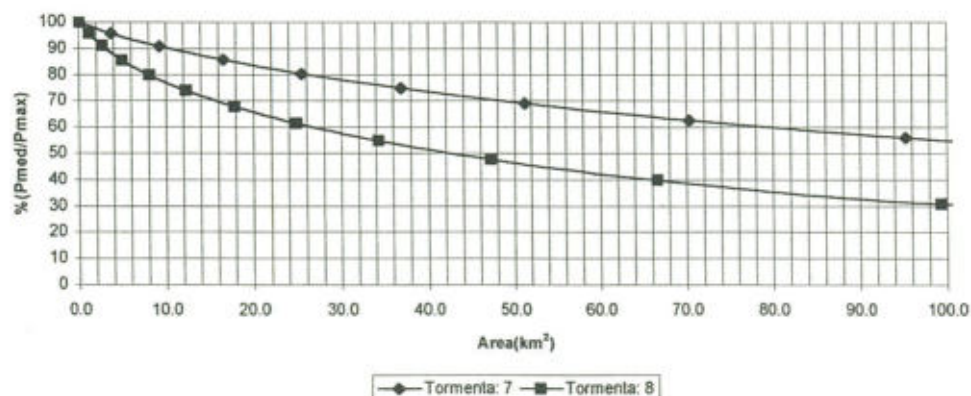



# REGISTRO DE TORMENTAS CALCULO DE LA PRECIPITACION MEDIA

Tormenta: 9

fecha: 1982 12 7

Duración: 3.11 horas

| Pre.min<br>(mm) | Pre.max<br>(mm) | Pre. promedio<br>(mm) | Nceldas | Nceldas<br>acumuladas | Precipitación(mm)<br>Promedio acumulada | % precipiación<br>total | Area Acumulada<br>km <sup>2</sup> |
|-----------------|-----------------|-----------------------|---------|-----------------------|-----------------------------------------|-------------------------|-----------------------------------|
| 0.25            | 3.43            | 1.84                  | 9929    | 21864                 | 7.60                                    | 18                      | 218.6                             |
| 3.43            | 6.86            | 5.14                  | 4071    | 11935                 | 12.38                                   | 30                      | 119.4                             |
| 6.86            | 10.28           | 8.57                  | 2347    | 7864                  | 16.13                                   | 39                      | 78.6                              |
| 10.28           | 13.71           | 12.00                 | 1572    | 5517                  | 19.35                                   | 47                      | 55.2                              |
| 13.71           | 17.14           | 15.43                 | 1147    | 3945                  | 22.28                                   | 54                      | 39.5                              |
| 17.14           | 20.57           | 18.85                 | 809     | 2798                  | 25.09                                   | 61                      | 28.0                              |
| 20.57           | 24.00           | 22.28                 | 656     | 1989                  | 27.63                                   | 67                      | 19.9                              |
| 24.00           | 27.42           | 25.71                 | 470     | 1333                  | 30.26                                   | 74                      | 13.3                              |
| 27.42           | 30.85           | 29.14                 | 347     | 863                   | 32.73                                   | 80                      | 8.6                               |
| 30.85           | 34.28           | 32.57                 | 239     | 516                   | 35.15                                   | 85                      | 5.2                               |
| 34.28           | 37.71           | 35.99                 | 165     | 277                   | 37.39                                   | 91                      | 2.8                               |
| 37.71           | 41.14           | 39.42                 | 111     | 112                   | 39.44                                   | 96                      | 1.1                               |
| 41.14           |                 | 41.14                 | 1       | 1                     | 41.14                                   | 100                     | 0                                 |

Nota: Tamaño de la celda 100 x 100 m

Tormenta: 10

fecha: 1981 8 23

Duración: 2.33 horas

| Pre.min<br>(mm) | Pre.max<br>(mm) | Pre. promedio<br>(mm) | Nceldas | Nceldas<br>acumuladas | Precipitación(mm)<br>Promedio acumulada | % precipiación<br>total | Area Acumulada<br>km <sup>2</sup> |
|-----------------|-----------------|-----------------------|---------|-----------------------|-----------------------------------------|-------------------------|-----------------------------------|
| 0.25            | 3.76            | 2.00                  | 10254   | 17493                 | 6.10                                    | 14                      | 174.9                             |
| 3.76            | 7.51            | 5.64                  | 2819    | 7239                  | 11.90                                   | 26                      | 72.4                              |
| 7.51            | 11.27           | 9.39                  | 1572    | 4420                  | 15.90                                   | 35                      | 44.2                              |
| 11.27           | 15.03           | 13.15                 | 1014    | 2848                  | 19.49                                   | 43                      | 28.5                              |
| 15.03           | 18.79           | 16.91                 | 611     | 1834                  | 22.99                                   | 51                      | 18.3                              |
| 18.79           | 22.54           | 20.66                 | 475     | 1223                  | 26.03                                   | 58                      | 12.2                              |
| 22.54           | 26.30           | 24.42                 | 279     | 748                   | 29.45                                   | 65                      | 7.5                               |
| 26.30           | 30.06           | 28.18                 | 195     | 469                   | 32.44                                   | 72                      | 4.7                               |
| 30.06           | 33.81           | 31.93                 | 124     | 274                   | 35.47                                   | 79                      | 2.7                               |
| 33.81           | 37.57           | 35.69                 | 72      | 150                   | 38.38                                   | 85                      | 1.5                               |
| 37.57           | 41.33           | 39.45                 | 49      | 78                    | 40.87                                   | 91                      | 0.8                               |
| 41.33           | 45.08           | 43.21                 | 28      | 29                    | 43.27                                   | 96                      | 0.3                               |
| 45.08           |                 | 45.08                 | 1       | 1                     | 45.08                                   | 100                     | 0                                 |

Nota: Tamaño de la celda 100 x 100 m

CURVA DE DISMINUCION DE LA PRECIPITACION CON EL AUMENTO DEL AREA  
BAÑADA

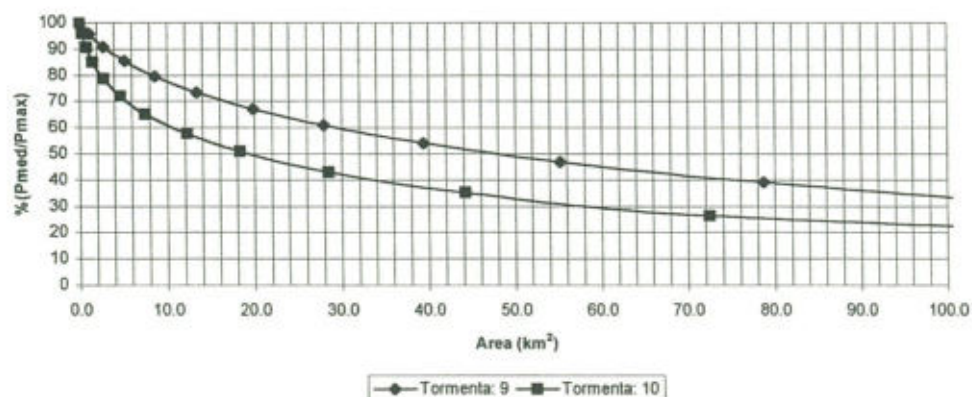

# REGISTRO DE TORMENTAS CALCULO DE LA PRECIPITACION MEDIA

Tormenta: 11

fecha: 1981 3 21

Duración: 18.5 horas

| Pre.min<br>(mm) | Pre.max<br>(mm) | Pre. promedio<br>(mm) | Nceldas | Nceldas<br>acumuladas | Precipitación(mm)<br>Promedio acumulada | % precipiación<br>total | Area Acumulada<br>km <sup>2</sup> |
|-----------------|-----------------|-----------------------|---------|-----------------------|-----------------------------------------|-------------------------|-----------------------------------|
| 0.25            | 2.23            | 1.24                  | 8031    | 100037                | 10.20                                   | 38                      | 1000.4                            |
| 2.23            | 4.46            | 3.35                  | 12087   | 92006                 | 10.99                                   | 41                      | 920.1                             |
| 4.46            | 6.70            | 5.58                  | 14424   | 79919                 | 12.14                                   | 45                      | 799.2                             |
| 6.70            | 8.93            | 7.81                  | 14015   | 65495                 | 13.59                                   | 51                      | 655.0                             |
| 8.93            | 11.16           | 10.04                 | 12518   | 51480                 | 15.16                                   | 57                      | 514.8                             |
| 11.16           | 13.39           | 12.28                 | 10268   | 38962                 | 16.80                                   | 63                      | 389.6                             |
| 13.39           | 15.62           | 14.51                 | 8157    | 28694                 | 18.42                                   | 69                      | 286.9                             |
| 15.62           | 17.86           | 16.74                 | 6524    | 20537                 | 19.97                                   | 75                      | 205.4                             |
| 17.86           | 20.09           | 18.97                 | 5095    | 14013                 | 21.48                                   | 80                      | 140.1                             |
| 20.09           | 22.32           | 21.20                 | 3949    | 8918                  | 22.91                                   | 86                      | 89.2                              |
| 22.32           | 24.55           | 23.44                 | 3112    | 4969                  | 24.27                                   | 91                      | 49.7                              |
| 24.55           | 26.78           | 25.67                 | 1856    | 1857                  | 25.67                                   | 96                      | 18.6                              |
| 26.78           |                 | 26.78                 | 1       | 1                     | 26.78                                   | 100                     | 0                                 |

Nota: Tamaño de la celda 100 x 100 m

Tormenta: 12

fecha: 1980 11 28

Duración: 2.35 horas

| Pre.min<br>(mm) | Pre.max<br>(mm) | Pre. promedio<br>(mm) | Nceldas | Nceldas<br>acumuladas | Precipitación(mm)<br>Promedio acumulada | % precipiación<br>total | Area Acumulada<br>km <sup>2</sup> |
|-----------------|-----------------|-----------------------|---------|-----------------------|-----------------------------------------|-------------------------|-----------------------------------|
| 0.25            | 3.28            | 1.76                  | 19940   | 38228                 | 6.69                                    | 17                      | 382.3                             |
| 3.28            | 6.55            | 4.92                  | 6163    | 18288                 | 12.06                                   | 31                      | 182.9                             |
| 6.55            | 9.83            | 8.19                  | 3505    | 12125                 | 15.70                                   | 40                      | 121.3                             |
| 9.83            | 13.11           | 11.47                 | 2395    | 8620                  | 18.75                                   | 48                      | 86.2                              |
| 13.11           | 16.39           | 14.75                 | 1736    | 6225                  | 21.55                                   | 55                      | 62.3                              |
| 16.39           | 19.66           | 18.02                 | 1308    | 4489                  | 24.18                                   | 61                      | 44.9                              |
| 19.66           | 22.94           | 21.30                 | 967     | 3181                  | 26.71                                   | 68                      | 31.8                              |
| 22.94           | 26.22           | 24.58                 | 750     | 2214                  | 29.08                                   | 74                      | 22.1                              |
| 26.22           | 29.49           | 27.85                 | 566     | 1464                  | 31.39                                   | 80                      | 14.6                              |
| 29.49           | 32.77           | 31.13                 | 412     | 898                   | 33.61                                   | 85                      | 9.0                               |
| 32.77           | 36.05           | 34.41                 | 293     | 486                   | 35.71                                   | 91                      | 4.9                               |
| 36.05           | 39.32           | 37.69                 | 192     | 193                   | 37.69                                   | 96                      | 1.9                               |
| 39.32           |                 | 39.32                 | 1       | 1                     | 39.32                                   | 100                     | 0                                 |

Nota: Tamaño de la celda 100 x 100 m

CURVA DE DISMINUCION DE LA PRECIPITACION CON EL AUMENTO DEL AREA  
BAÑADA

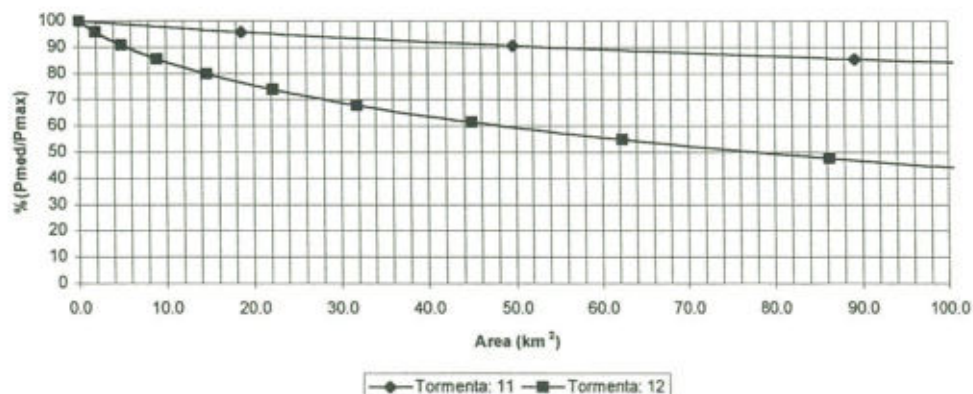



# REGISTRO DE TORMENTAS CALCULO DE LA PRECIPITACION MEDIA

Tormenta: 13

fecha: 1980 10 20

Duración: 3.6 horas

| Pre.min<br>(mm) | Pre.max<br>(mm) | Pre. promedio<br>(mm) | Nceldas | Nceldas<br>acumuladas | Precipitación(mm)<br>Promedio acumulada | % precipitación<br>total | Area Acumulada<br>km <sup>2</sup> |
|-----------------|-----------------|-----------------------|---------|-----------------------|-----------------------------------------|--------------------------|-----------------------------------|
| 0.25            | 2.71            | 1.48                  | 16666   | 32341                 | 5.44                                    | 17                       | 323.4                             |
| 2.71            | 5.42            | 4.06                  | 5486    | 15675                 | 9.65                                    | 30                       | 156.8                             |
| 5.42            | 8.12            | 6.77                  | 3085    | 10189                 | 12.66                                   | 39                       | 101.9                             |
| 8.12            | 10.83           | 9.48                  | 2046    | 7104                  | 15.21                                   | 47                       | 71.0                              |
| 10.83           | 13.54           | 12.19                 | 1475    | 5058                  | 17.53                                   | 54                       | 50.6                              |
| 13.54           | 16.25           | 14.89                 | 1065    | 3583                  | 19.73                                   | 61                       | 35.8                              |
| 16.25           | 18.96           | 17.60                 | 824     | 2518                  | 21.78                                   | 67                       | 25.2                              |
| 18.96           | 21.66           | 20.31                 | 597     | 1694                  | 23.81                                   | 73                       | 16.9                              |
| 21.66           | 24.37           | 23.02                 | 457     | 1097                  | 25.71                                   | 79                       | 11.0                              |
| 24.37           | 27.08           | 25.73                 | 319     | 640                   | 27.63                                   | 85                       | 6.4                               |
| 27.08           | 29.79           | 28.43                 | 192     | 321                   | 29.53                                   | 91                       | 3.2                               |
| 29.79           | 32.50           | 31.14                 | 128     | 129                   | 31.15                                   | 96                       | 1.3                               |
| 32.50           |                 | 32.50                 | 1       | 1                     | 32.50                                   | 100                      | 0                                 |

Nota: Tamaño de la celda 100 x 100 m

Tormenta: 14

fecha: 1980 12 26

Duración: 2.72 horas

| Pre.min<br>(mm) | Pre.max<br>(mm) | Pre. promedio<br>(mm) | Nceldas | Nceldas<br>acumuladas | Precipitación(mm)<br>Promedio acumulada | % precipitación<br>total | Area Acumulada<br>km <sup>2</sup> |
|-----------------|-----------------|-----------------------|---------|-----------------------|-----------------------------------------|--------------------------|-----------------------------------|
| 0.25            | 5.17            | 2.71                  | 34585   | 68993                 | 9.24                                    | 15                       | 689.9                             |
| 5.17            | 10.33           | 7.75                  | 14102   | 34408                 | 15.80                                   | 25                       | 344.1                             |
| 10.33           | 15.50           | 12.92                 | 7540    | 20306                 | 21.40                                   | 35                       | 203.1                             |
| 15.50           | 20.67           | 18.08                 | 4561    | 12766                 | 26.40                                   | 43                       | 127.7                             |
| 20.67           | 25.84           | 23.25                 | 3031    | 8205                  | 31.03                                   | 50                       | 82.1                              |
| 25.84           | 31.00           | 28.42                 | 1968    | 5174                  | 35.58                                   | 57                       | 51.7                              |
| 31.00           | 36.17           | 33.59                 | 1298    | 3206                  | 39.98                                   | 64                       | 32.1                              |
| 36.17           | 41.34           | 38.75                 | 809     | 1908                  | 44.33                                   | 71                       | 19.1                              |
| 41.34           | 46.50           | 43.92                 | 513     | 1099                  | 48.44                                   | 78                       | 11.0                              |
| 46.50           | 51.67           | 49.09                 | 309     | 586                   | 52.39                                   | 84                       | 5.9                               |
| 51.67           | 56.84           | 54.25                 | 180     | 277                   | 56.07                                   | 90                       | 2.8                               |
| 56.84           | 62.00           | 59.42                 | 96      | 97                    | 59.45                                   | 96                       | 1.0                               |
| 62.00           |                 | 62.00                 | 1       | 1                     | 62.00                                   | 100                      | 0                                 |

Nota: Tamaño de la celda 100 x 100 m

CURVA DE DISMINUCION DE LA PRECIPITACION CON EL AUMENTO DEL AREA  
BAÑADA

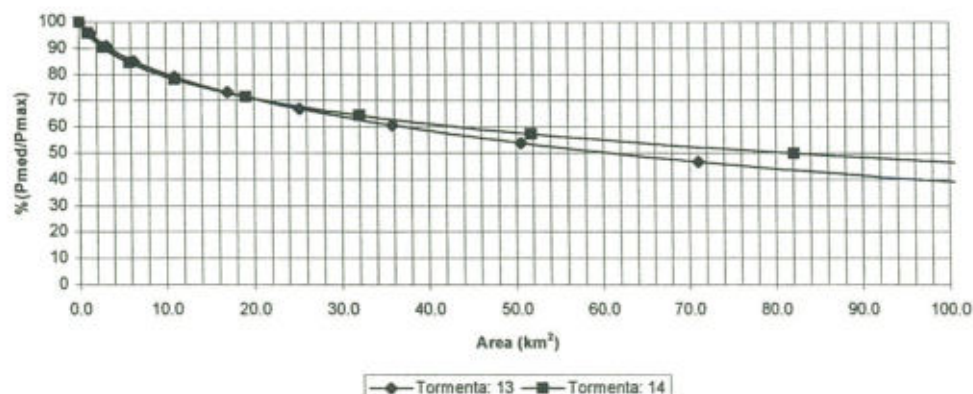

REGISTRO DE TORMENTAS  
CALCULO DE LA PRECIPITACION MEDIA

Tormenta: 15

fecha: 1984 2 10

Duración: 1.6 horas

| Pre.min<br>(mm) | Pre.max<br>(mm) | Pre. promedio<br>(mm) | Nceldas | Nceldas<br>acumuladas | Precipitación(mm)<br>Promedio acumulada | % precipitación<br>total | Area Acumulada<br>km <sup>2</sup> |
|-----------------|-----------------|-----------------------|---------|-----------------------|-----------------------------------------|--------------------------|-----------------------------------|
| 0.25            | 2.40            | 1.33                  | 10478   | 25698                 | 6.85                                    | 24                       | 257.0                             |
| 2.40            | 4.80            | 3.60                  | 4067    | 15220                 | 10.65                                   | 37                       | 152.2                             |
| 4.80            | 7.20            | 6.00                  | 2509    | 11153                 | 13.22                                   | 46                       | 111.5                             |
| 7.20            | 9.60            | 8.40                  | 1824    | 8644                  | 15.31                                   | 53                       | 86.4                              |
| 9.60            | 12.00           | 10.80                 | 1439    | 6820                  | 17.16                                   | 60                       | 68.2                              |
| 12.00           | 14.40           | 13.20                 | 1205    | 5381                  | 18.86                                   | 65                       | 53.8                              |
| 14.40           | 16.80           | 15.60                 | 998     | 4176                  | 20.50                                   | 71                       | 41.8                              |
| 16.80           | 19.20           | 18.00                 | 853     | 3178                  | 22.04                                   | 77                       | 31.8                              |
| 19.20           | 21.60           | 20.40                 | 717     | 2325                  | 23.52                                   | 82                       | 23.3                              |
| 21.60           | 24.00           | 22.80                 | 627     | 1608                  | 24.91                                   | 86                       | 16.1                              |
| 24.00           | 26.40           | 25.20                 | 551     | 981                   | 26.25                                   | 91                       | 9.8                               |
| 26.40           | 28.80           | 27.60                 | 429     | 430                   | 27.60                                   | 96                       | 4.3                               |
| 28.80           |                 | 28.80                 | 1       | 1                     | 28.80                                   | 100                      | 0                                 |

Nota: Tamaño de la celda 100 x 100 m

CURVA DE DISMINUCION DE LA PRECIPITACION CON EL AUMENTO DEL AREA  
BAÑADA

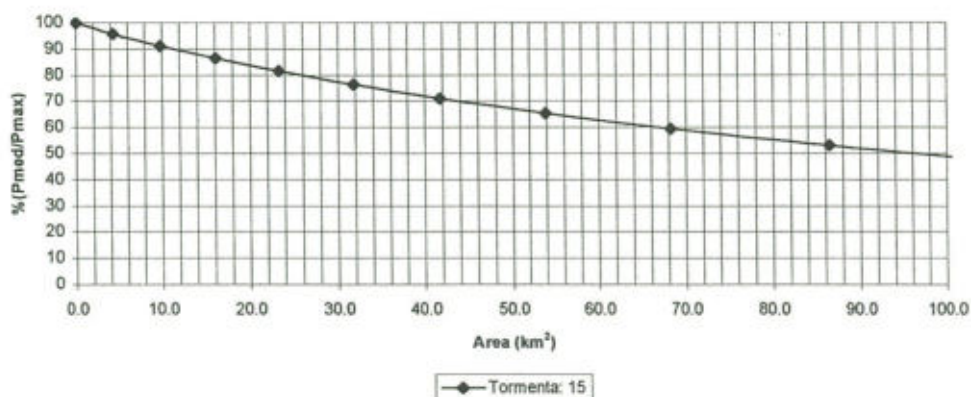



## **ANEXO F**

### **REPORTE DE ESCENARIOS DE MODELACIÓN DEL FENÓMENO PRECIPITACIÓN-ESCURRIMIENTO UTILIZANDO EL PROGRAMA MISION**

# **ESCENARIO: A** **AUMENTO DE DURACION DE LLUVIA**

**MICROCUENCA:** Rumipamba  
**Area:** 6.52 km<sup>2</sup>

| ESCENARIO                                             | Símbolo | A1      | A2      | A3      | A4      | A5      | A6      | A7      | A8      | Unidad            |
|-------------------------------------------------------|---------|---------|---------|---------|---------|---------|---------|---------|---------|-------------------|
| <b>PRECIPITACION</b>                                  |         |         |         |         |         |         |         |         |         |                   |
| <b>CENTRO DE TORMENTA (CT); CONDICIONES DE BORDE</b>  |         |         |         |         |         |         |         |         |         |                   |
| Latitud del centro de tormenta(CT)                    |         | 774000  | 774000  | 774000  | 773950  | 773350  | 772800  | 772700  | 772600  |                   |
| Longitud del centro de tormenta(CT)                   |         | 9979500 | 9979500 | 9979500 | 9979500 | 9979500 | 9979500 | 9979500 | 9979500 |                   |
| Duración inicial                                      | DT      | 1.6     | 2.7     | 4.34    | 6.0     | 9.0     | 12.0    | 15.0    | 18.0    | hora              |
| Precipitación inicial                                 | PRE     | 41.1    | 45.5    | 46.5    | 45.8    | 44.4    | 42.7    | 41.5    | 40.4    | mm                |
| Azímüt de dirección de vientos                        | Azímüt  | 90.00   | 90.00   | 90.00   | 90.00   | 90.00   | 90.00   | 90.00   | 90.00   |                   |
| Velocidad de vientos en longitud                      | Vx      | 4.55    | 3.43    | 2.50    | 1.99    | 1.45    | 1.15    | 0.97    | 0.84    | km/h              |
| Velocidad de vientos en latitud                       | Vy      | 0.00    | 0.00    | 0.00    | 0.00    | 0.00    | 0.00    | 0.00    | 0.00    | km/h              |
| <b>CENTRO DE TORMENTA (CTc) A NIVEL DE SUPERFICIE</b> |         |         |         |         |         |         |         |         |         |                   |
| Duración en centro de tormenta                        | DTc     | 1.4     | 2       | 3       | 4       | 6       | 8       | 10      | 12      | hora              |
| Coefficiente de forma de tormenta                     | n       | 3.99    | 3.59    | 3.18    | 2.92    | 2.58    | 2.37    | 2.22    | 2.10    |                   |
| Velocidad media de movimiento                         | K       | 7.07    | 5.37    | 3.94    | 3.15    | 2.31    | 1.85    | 1.56    | 1.36    | km/h              |
| Velocidad de vientos                                  | V       | 4.55    | 3.43    | 2.50    | 1.99    | 1.45    | 1.15    | 0.97    | 0.84    | km/h              |
| Intensidad                                            | Ic      | 29.34   | 19.97   | 12.90   | 9.46    | 6.11    | 4.48    | 3.52    | 2.89    | mm/h              |
| Precipitación                                         | PREc    | 41.08   | 39.95   | 38.70   | 37.84   | 36.66   | 35.85   | 35.23   | 34.73   | mm                |
| Radio máximo                                          | Rmax    | 11.31   | 14.30   | 17.08   | 18.93   | 20.89   | 22.22   | 23.40   | 24.41   | km                |
| Longitud de recorrido                                 | Lrec    | 7.28    | 9.14    | 10.83   | 11.94   | 13.08   | 13.84   | 14.52   | 15.09   | km                |
| Hora de inicio de tormenta                            | HI      | 15.60   | 15.60   | 15.60   | 15.60   | 15.60   | 15.60   | 15.60   | 15.60   | hora              |
| Tiempo de desfase                                     | Td      | 1.29    | 1.29    | 1.29    | 1.29    | 1.29    | 1.29    | 1.29    | 1.29    | hora              |
| Coefficiente de patrón temporal                       | k2      | 0.40    | 0.39    | 0.37    | 0.35    | 0.34    | 0.33    | 0.32    | 0.31    |                   |
| Velocidad de inicio Vi                                | Vi      | 8.79    | 11.12   | 13.28   | 14.72   | 16.25   | 17.28   | 18.19   | 18.98   | km/h              |
| Velocidad de fin Vf                                   | Vf      | -36.04  | -10.41  | -5.59   | -4.02   | -2.69   | -2.07   | -1.71   | -1.46   | km/h              |
| Latitud del centro de tormenta(CTc)                   |         | 774000  | 774000  | 774000  | 774000  | 774000  | 774000  | 774000  | 774000  |                   |
| Longitud del centro de tormenta(CTc)                  |         | 9979500 | 9979500 | 9979500 | 9979500 | 9979500 | 9979500 | 9979500 | 9979500 |                   |
| <b>ESCURRIMIENTO</b>                                  |         |         |         |         |         |         |         |         |         |                   |
| Abstracciones iniciales                               |         | 11.15   | 11.15   | 11.15   | 11.15   | 11.15   | 11.15   | 11.15   | 11.15   |                   |
| Número de curva                                       | CN      | 82.00   | 82.00   | 82.00   | 82.00   | 82.00   | 82.00   | 82.00   | 82.00   | mm/h              |
| <b>RESULTADOS</b>                                     |         |         |         |         |         |         |         |         |         |                   |
| Caudal Pico                                           | Qp      | 9.37    | 10.58   | 9.85    | 8.58    | 6.79    | 5.11    | 4.08    | 3.37    | m <sup>3</sup> /s |
| Volumen de crecida                                    | Vol     | 23561   | 35410   | 42412   | 44776   | 47065   | 45334   | 44591   | 43290   | m <sup>3</sup>    |
| Precipitación Efectiva                                | Pefec   | 3.61    | 5.43    | 6.50    | 6.87    | 7.22    | 6.95    | 6.84    | 6.64    | mm                |
| Hora Pico                                             | Hp      | 1.28    | 1.44    | 1.63    | 1.83    | 2.20    | 2.57    | 2.91    | 3.23    | h                 |
| Hora de inicio de escurrimiento                       | He      | 0.52    | 0.50    | 0.54    | 0.60    | 0.80    | 1.02    | 1.17    | 1.31    | h                 |
| Tiempo Relativo al Pico                               | Tp      | 0.76    | 0.94    | 1.09    | 1.23    | 1.40    | 1.55    | 1.74    | 1.92    | h                 |

**HIDROGRAMAS DE CRECIDA EN MICROCUENCA RUMIPAMBA**

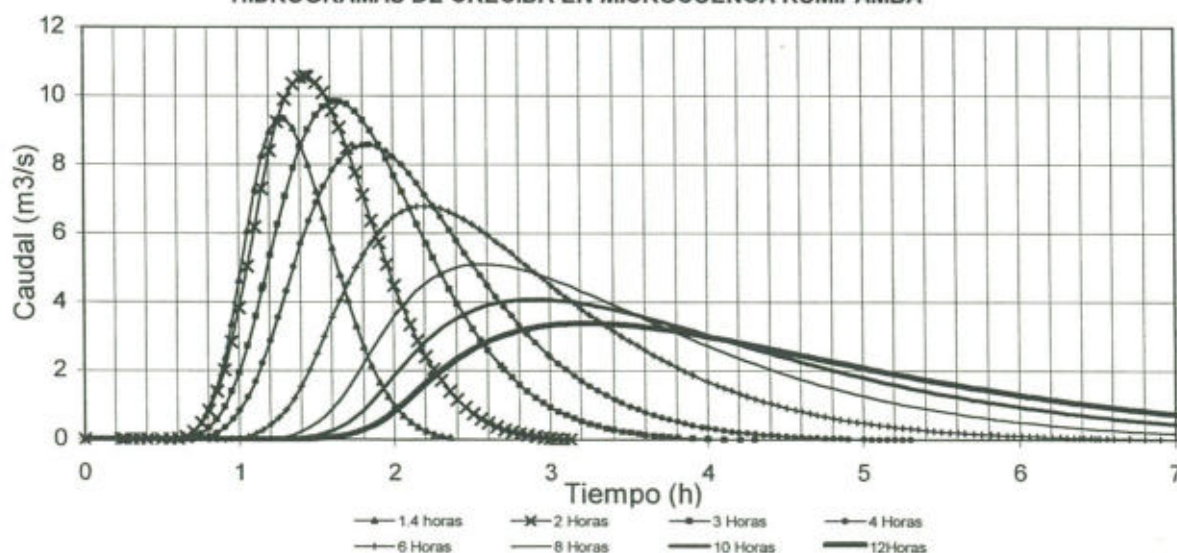



ESCENARIO: A1

MICROCUECENCA: Rumipamba  
Area: 6.52 km<sup>2</sup>

| PRECIPITACION                                  |                |
|------------------------------------------------|----------------|
| CENTRO DE TORMENTA (CT); CONDICIONES DE BORDE  |                |
| Latitud del centro de tormenta(CT)             | 774000         |
| Longitud del centro de tormenta(CT)            | 9979500        |
| Duración inicial                               | DT 1.6 hora    |
| Precipitación inicial                          | PRE 41.1 mm    |
| Azmut de dirección de vientos                  | Azimut 90.00   |
| Velocidad de vientos en longitud               | Vx 4.55 km/h   |
| Velocidad de vientos en latitud                | Vy 0.00 km/h   |
| CENTRO DE TORMENTA (CTc) A NIVEL DE SUPERFICIE |                |
| Duración en centro de tormenta                 | DTc 1.4 hora   |
| Coefficiente de forma de tormenta              | n 3.99         |
| Velocidad media de movimiento                  | K 7.07 km/h    |
| Velocidad de vientos                           | V 4.55 km/h    |
| Intensidad                                     | Ic 29.34 mm/h  |
| Precipitación                                  | PREc 41.08 mm  |
| Radio máximo                                   | Rmax 11.31 km  |
| Longitud de recorrido                          | Lrec 7.28 km   |
| Hora de inicio de tormenta                     | Hl 15.60 hora  |
| Tiempo de desfase                              | Td 1.29 hora   |
| Coefficiente de patrón temporal                | k2 0.40        |
| Velocidad de inicio Vi                         | Vi 8.79 km/h   |
| Velocidad de fin Vf                            | Vf -36.04 km/h |
| Latitud del centro de tormenta(CTc)            | 774000         |
| Longitud del centro de tormenta(CTc)           | 9979500        |
| ESCURRIMIENTO                                  |                |
| Abstracciones iniciales                        | 11.15 mm       |
| Número de curva                                | CN 82          |
| RESULTADOS                                     |                |
| Caudal Pico                                    | Qp 9.37 m3/s   |
| Volumen de crecida                             | Vol 23561 m3   |
| Precipitación Efectiva                         | Pefec 3.61 mm  |
| Hora Pico                                      | Hp 1.28 h      |
| Hora de inicio de escurrimiento                | He 0.52 h      |
| Tiempo Relativo al Pico                        | Tp 0.76 h      |

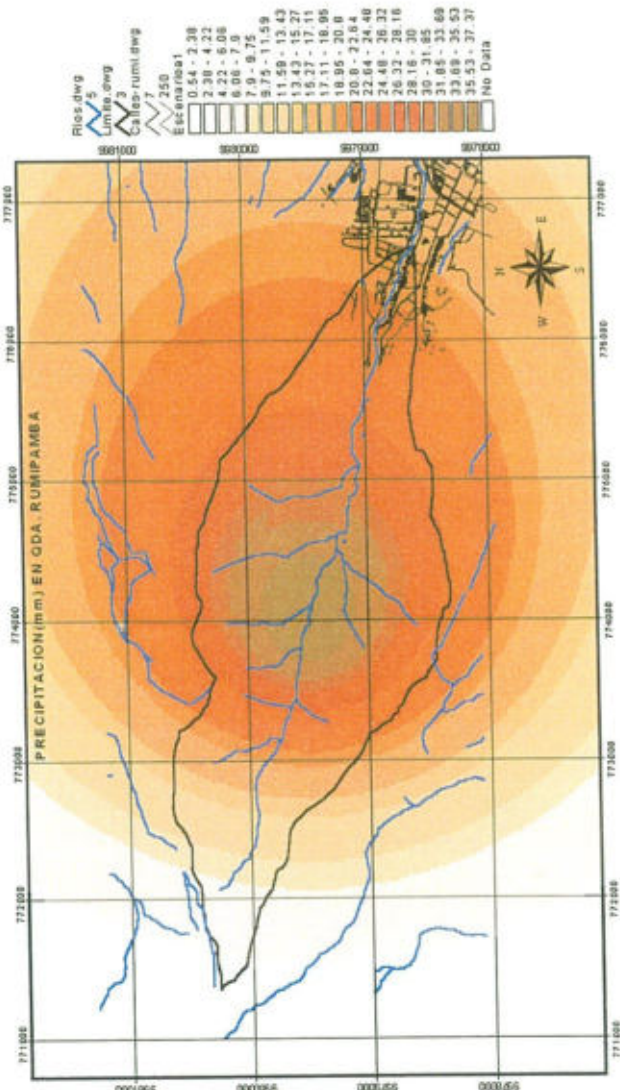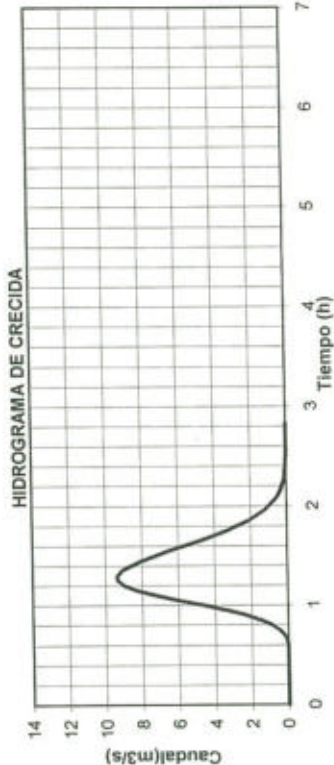

ESCENARIO: A2

MICROCUECENCA: Rumipamba  
Area: 6.52 km<sup>2</sup>

| PRECIPITACION                                  |         |             |
|------------------------------------------------|---------|-------------|
| CENTRO DE TORMENTA (CT); CONDICIONES DE BORDE  |         |             |
| Latitud del centro de tormenta(CT)             | 774000  |             |
| Longitud del centro de tormenta(CT)            | 9979500 |             |
| Duración inicial                               | DT      | 2.7 hora    |
| Precipitación inicial                          | PRE     | 45.5 mm     |
| Azimet de dirección de vientos                 | Azimet  | 90.00       |
| Velocidad de vientos en longitud               | Vx      | 3.43 km/h   |
| Velocidad de vientos en latitud                | Vy      | 0.00 km/h   |
| CENTRO DE TORMENTA (CTc) A NIVEL DE SUPERFICIE |         |             |
| Duración en centro de tormenta                 | DTc     | 2 hora      |
| Coefficiente de forma de tormenta              | n       | 3.59        |
| Velocidad media de movimiento                  | K       | 5.37 km/h   |
| Velocidad de vientos                           | V       | 3.43 km/h   |
| Intensidad                                     | Ic      | 19.97 mm/h  |
| Precipitación                                  | PREc    | 39.95 mm    |
| Radio máximo                                   | Rmax    | 14.30 km    |
| Longitud de recorrido                          | Lrec    | 9.14 km     |
| Hora de inicio de tormenta                     | HI      | 15.60 hora  |
| Tiempo de desfase                              | Td      | 1.29 hora   |
| Coefficiente de patrón temporal                | k2      | 0.39        |
| Velocidad de inicio Vi                         | Vi      | 11.12 km/h  |
| Velocidad de fin Vf                            | Vf      | -10.41 km/h |
| Latitud del centro de tormenta(CTc)            | 774000  |             |
| Longitud del centro de tormenta(CTc)           | 9979500 |             |

| ESCURRIMIENTO                   |       |            |
|---------------------------------|-------|------------|
| Abstracciones iniciales         |       | 11.15 mm   |
| Número de curva                 | CN    | 82         |
| RESULTADOS                      |       |            |
| Caudal Pico                     | Qp    | 10.58 m3/s |
| Volumen de crecida              | Vol   | 35410 m3   |
| Precipitación Efectiva          | Pefec | 5.43 mm    |
| Hora Pico                       | Hp    | 1.44 h     |
| Hora de inicio de escurrimiento | He    | 0.50 h     |
| Tiempo Relativo al Pico         | Tp    | 0.94 h     |

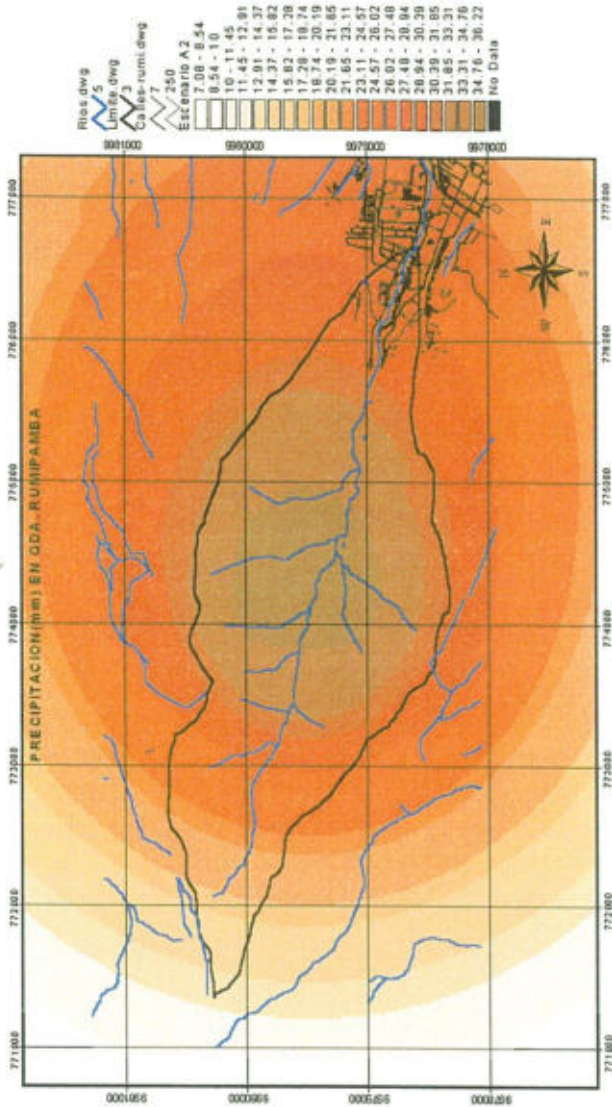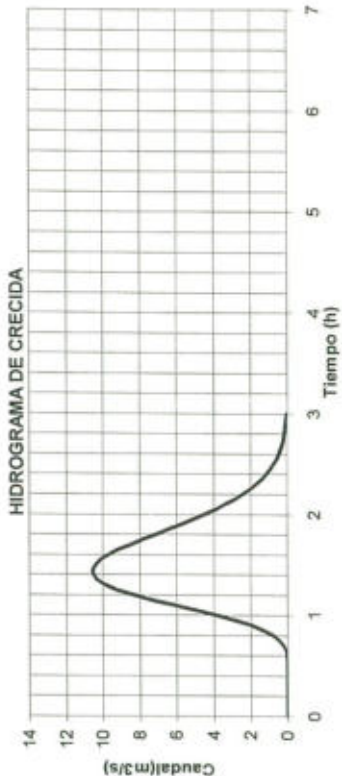



ESCENARIO:

A3

MICROCUCIENCA:

Rumipamba

Area:

6.52 km<sup>2</sup>

| PRECIPITACION                                  |         |         |      |
|------------------------------------------------|---------|---------|------|
| CENTRO DE TORMENTA (CT); CONDICIONES DE BORDE  |         |         |      |
| Latitud del centro de tormenta(CT)             |         | 774000  |      |
| Longitud del centro de tormenta(CT)            |         | 9979500 |      |
| Duración inicial                               | DT      | 4.3     | hora |
| Precipitación inicial                          | PRE     | 46.5    | mm   |
| Azimuth de dirección de vientos                | Azimuth | 90.00   |      |
| Velocidad de vientos en longitud               | Vx      | 2.50    | km/h |
| Velocidad de vientos en latitud                | Vy      | 0.00    | km/h |
| CENTRO DE TORMENTA (CTc) A NIVEL DE SUPERFICIE |         |         |      |
| Duración en centro de tormenta                 | DTc     | 3       | hora |
| Coefficiente de forma de tormenta              | n       | 3.18    |      |
| Velocidad media de movimiento                  | K       | 3.94    | km/h |
| Velocidad de vientos                           | V       | 2.50    | km/h |
| Intensidad                                     | Ic      | 12.90   | mm/h |
| Precipitación                                  | PREc    | 38.70   | mm   |
| Radio máximo                                   | Rmax    | 17.08   | km   |
| Longitud de recorrido                          | Lrec    | 10.83   | km   |
| Hora de inicio de tormenta                     | HI      | 15.60   | hora |
| Tiempo de desfase                              | Td      | 1.29    | hora |
| Coefficiente de patrón temporal                | k2      | 0.37    |      |
| Velocidad de inicio Vi                         | Vi      | 13.28   | km/h |
| Velocidad de fin Vf                            | Vf      | -5.59   | km/h |
| Latitud del centro de tormenta(CTc)            |         | 774000  |      |
| Longitud del centro de tormenta(CTc)           |         | 9979500 |      |
| ESCURRIMIENTO                                  |         |         |      |
| Abstracciones iniciales                        | CN      | 11.15   | mm   |
| Número de curva                                |         | 82      |      |
| RESULTADOS                                     |         |         |      |
| Caudal Pico                                    | Qp      | 9.85    | m3/s |
| Volumen de crecida                             | Vol     | 42412   | m3   |
| Precipitación Efectiva                         | Pefec   | 6.50    | mm   |
| Hora Pico                                      | Hp      | 1.63    | h    |
| Hora de inicio de escurrimiento                | He      | 0.54    | h    |
| Tiempo Relativo al Pico                        | Tp      | 1.09    | h    |

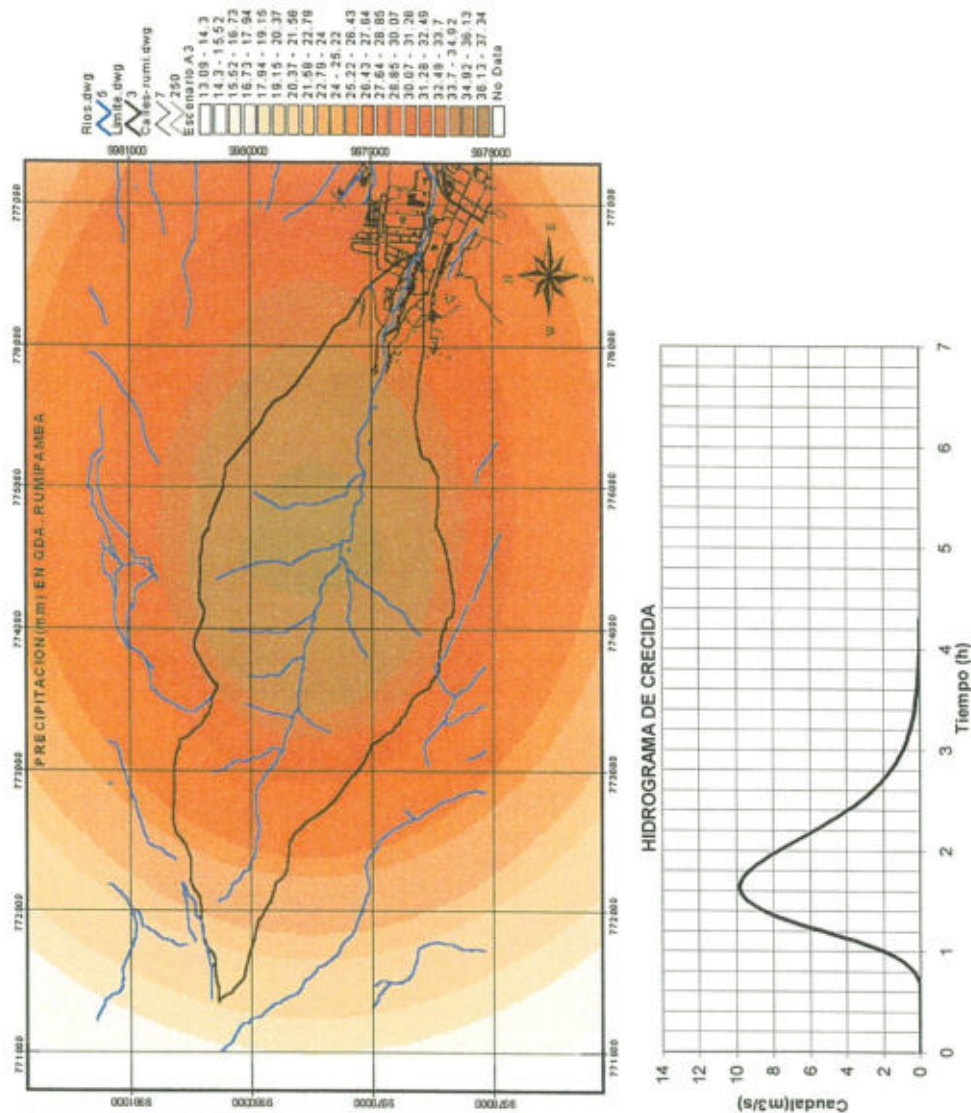

# ESCENARIO:

A4

## MICROCUENCA:

Rumipamba  
6.52 km<sup>2</sup>

| PRECIPITACION                                  |       |         |      |
|------------------------------------------------|-------|---------|------|
| CENTRO DE TORMENTA (CT): CONDICIONES DE BORDE  |       |         |      |
| Latitud del centro de tormenta(CT)             |       | 773950  |      |
| Longitud del centro de tormenta(CT)            |       | 9979500 |      |
| Duración inicial                               | DT    | 6.0     | hora |
| Precipitación inicial                          | PRE   | 45.8    | mm   |
| Azmut de dirección de vientos                  | Azmut | 90.00   |      |
| Velocidad de vientos en longitud               | Vx    | 1.99    | km/h |
| Velocidad de vientos en latitud                | Vy    | 0.00    | km/h |
| CENTRO DE TORMENTA (CTc) A NIVEL DE SUPERFICIE |       |         |      |
| Duración en centro de tormenta                 | DTc   | 4       | hora |
| Coefficiente de forma de tormenta              | n     | 2.92    |      |
| Velocidad media de movimiento                  | K     | 3.15    | km/h |
| Velocidad de vientos                           | V     | 1.99    | km/h |
| Intensidad                                     | Ic    | 9.46    | mm/h |
| Precipitación                                  | PREc  | 37.84   | mm   |
| Radio máximo                                   | Rmax  | 18.93   | km   |
| Longitud de recorrido                          | Lrec  | 11.94   | km   |
| Hora de inicio de tormenta                     | HI    | 15.60   | hora |
| Tiempo de desfase                              | Td    | 1.29    | hora |
| Coefficiente de patrón temporal                | k2    | 0.35    |      |
| Velocidad de inicio Vi                         | Vi    | 14.72   | km/h |
| Velocidad de fin Vf                            | Vf    | -4.02   | km/h |
| Latitud del centro de tormenta(CTc)            |       | 774000  |      |
| Longitud del centro de tormenta(CTc)           |       | 9979500 |      |
| ESCURRIMIENTO                                  |       |         |      |
| Abstracciones iniciales                        | CN    | 11.15   | mm   |
| Número de curva                                |       | 82      |      |
| RESULTADOS                                     |       |         |      |
| Caudal Pico                                    | Qp    | 8.58    | m3/s |
| Volumen de crecida                             | Vol   | 44776   | m3   |
| Precipitación Efectiva                         | Pefec | 6.87    | mm   |
| Hora Pico                                      | Hp    | 1.83    | h    |
| Hora de inicio de escurrimiento                | He    | 0.60    | h    |
| Tiempo Relativo al Pico                        | Tp    | 1.23    | h    |

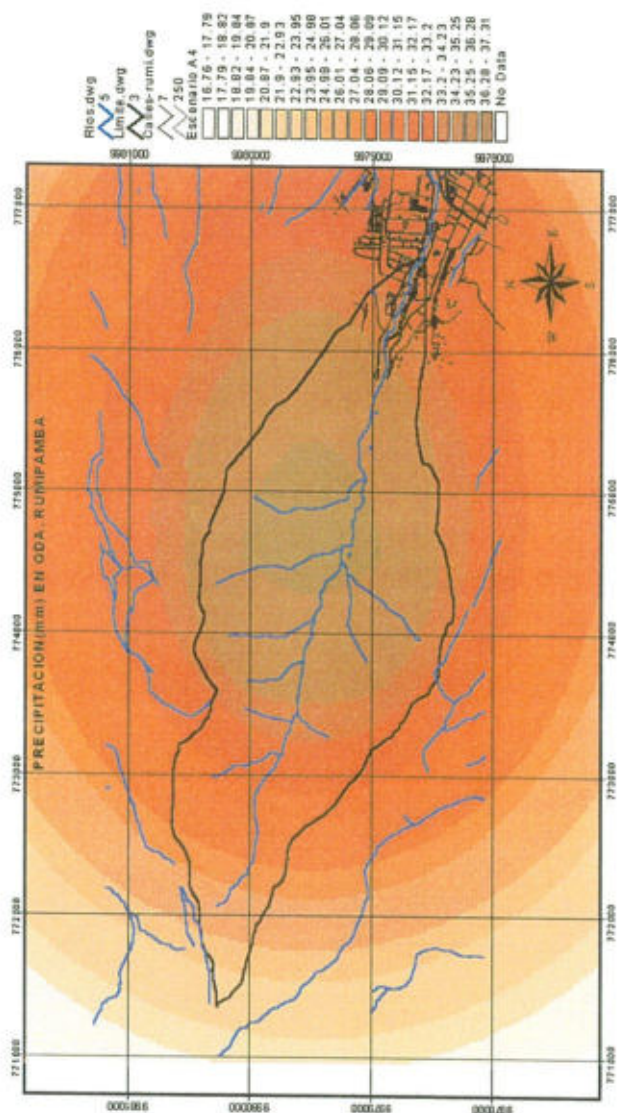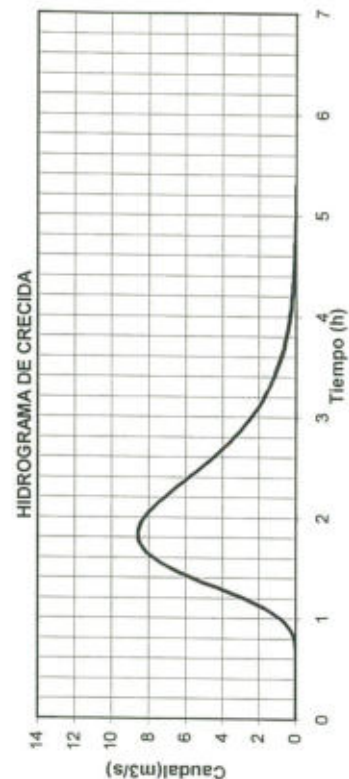



ESCENARIO:

A5

MICROCUEENCA:

Rumipamba

Area: 6.52 km²

| PRECIPITACION                                  |        |  |  |  |  |  |  |         |      |
|------------------------------------------------|--------|--|--|--|--|--|--|---------|------|
| CENTRO DE TORMENTA (CT); CONDICIONES DE BORDE  |        |  |  |  |  |  |  |         |      |
| Latitud del centro de tormenta(CT)             |        |  |  |  |  |  |  | 773350  |      |
| Longitud del centro de tormenta(CT)            |        |  |  |  |  |  |  | 9979500 |      |
| Duración inicial                               | DT     |  |  |  |  |  |  | 9.0     | hora |
| Precipitación inicial                          | PRE    |  |  |  |  |  |  | 44.4    | mm   |
| Azimuth de dirección de vientos                | Azimut |  |  |  |  |  |  | 90.00   | km/h |
| Velocidad de vientos en longitud               | Vx     |  |  |  |  |  |  | 1.45    | km/h |
| Velocidad de vientos en latitud                | Vy     |  |  |  |  |  |  | 0.00    | km/h |
| CENTRO DE TORMENTA (CTc) A NIVEL DE SUPERFICIE |        |  |  |  |  |  |  |         |      |
| Duración en centro de tormenta                 | DTc    |  |  |  |  |  |  | 6       | hora |
| Coefficiente de forma de tormenta              | n      |  |  |  |  |  |  | 2.58    |      |
| Velocidad media de movimiento                  | K      |  |  |  |  |  |  | 2.31    | km/h |
| Velocidad de vientos                           | V      |  |  |  |  |  |  | 1.45    | km/h |
| Intensidad                                     | Ic     |  |  |  |  |  |  | 6.11    | mm/h |
| Precipitación                                  | PREc   |  |  |  |  |  |  | 36.66   | mm   |
| Radio máximo                                   | Rmax   |  |  |  |  |  |  | 20.89   | km   |
| Longitud de recorrido                          | Lrec   |  |  |  |  |  |  | 13.08   | km   |
| Hora de inicio de tormenta                     | HI     |  |  |  |  |  |  | 15.60   | hora |
| Tiempo de desfase                              | Td     |  |  |  |  |  |  | 1.29    | hora |
| Coefficiente de patrón temporal                | k2     |  |  |  |  |  |  | 0.34    |      |
| Velocidad de inicio Vi                         | Vi     |  |  |  |  |  |  | 16.25   | km/h |
| Velocidad de fin Vf                            | Vf     |  |  |  |  |  |  | -2.69   | km/h |
| Latitud del centro de tormenta(CTc)            |        |  |  |  |  |  |  | 774000  |      |
| Longitud del centro de tormenta(CTc)           |        |  |  |  |  |  |  | 9979500 |      |
| ESCURRIMIENTO                                  |        |  |  |  |  |  |  |         |      |
| Abstracciones iniciales                        |        |  |  |  |  |  |  | 11.15   | mm   |
| Número de curva                                | CN     |  |  |  |  |  |  | 82      |      |
| RESULTADOS                                     |        |  |  |  |  |  |  |         |      |
| Caudal Pico                                    | Qp     |  |  |  |  |  |  | 6.79    | m3/s |
| Volumen de crecida                             | Vol    |  |  |  |  |  |  | 47065   | m3   |
| Precipitación Efectiva                         | Pefec  |  |  |  |  |  |  | 7.22    | mm   |
| Hora Pico                                      | Hp     |  |  |  |  |  |  | 2.20    | h    |
| Hora de inicio de escurrimiento                | He     |  |  |  |  |  |  | 0.80    | h    |
| Tiempo Relativo al Pico                        | Tp     |  |  |  |  |  |  | 1.40    | h    |

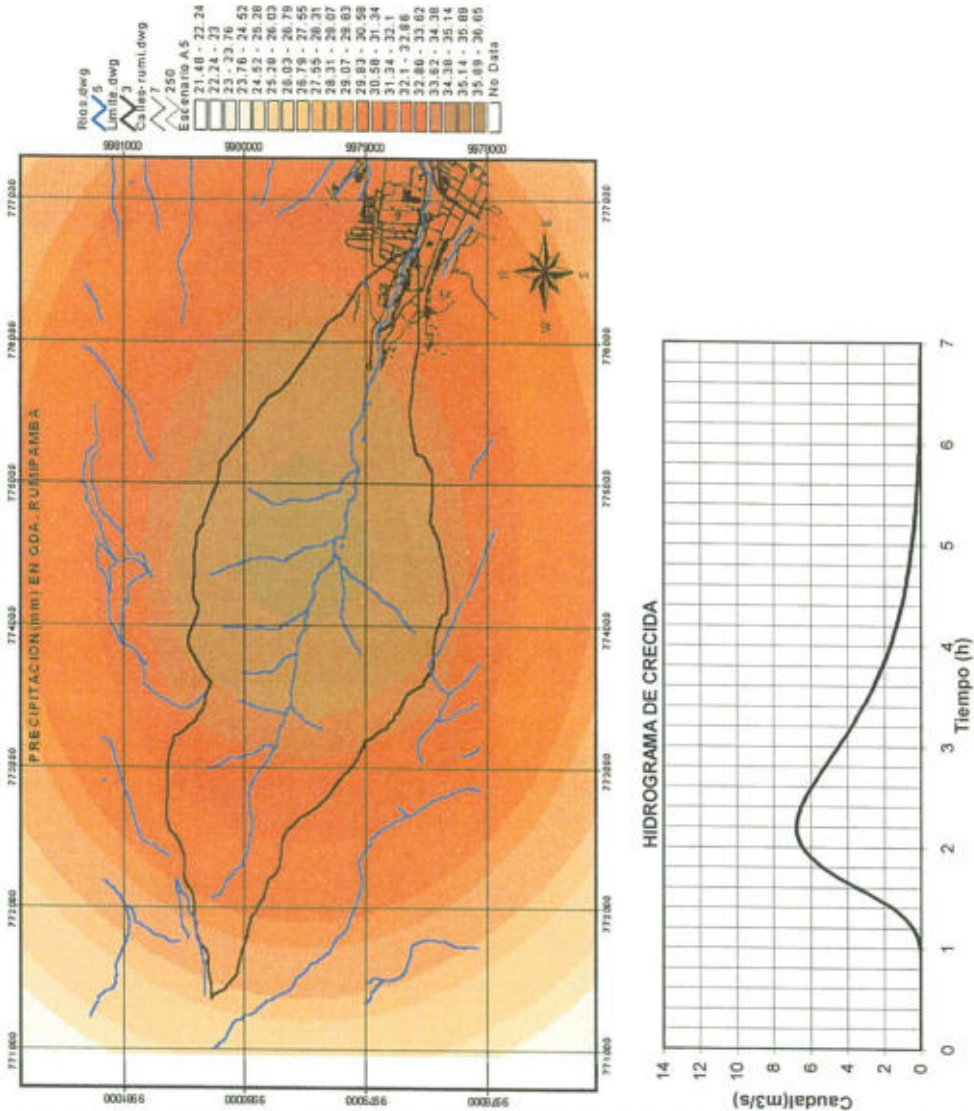

# ESCENARIO:

A6

MICROCUENCA:

Rumipamba

6.52 km<sup>2</sup>

## PRECIPITACION

| CENTRO DE TORMENTA (CT); CONDICIONES DE BORDE  |               |
|------------------------------------------------|---------------|
| Latitud del centro de tormenta(CT)             | 772800        |
| Longitud del centro de tormenta(CT)            | 9979500       |
| Duración inicial                               | DT 12.0 hora  |
| Precipitación inicial                          | PRE 42.7 mm   |
| Azmut de dirección de vientos                  | Azimut 90.00  |
| Velocidad de vientos en longitud               | Vx 1.15 km/h  |
| Velocidad de vientos en latitud                | Vy 0.00 km/h  |
| CENTRO DE TORMENTA (CTc) A NIVEL DE SUPERFICIE |               |
| Duración en centro de tormenta                 | DTc 8 hora    |
| Coefficiente de forma de tormenta              | n 2.37        |
| Velocidad media de movimiento                  | K 1.85 km/h   |
| Velocidad de vientos                           | V 1.15 km/h   |
| Intensidad                                     | Ic 4.48 mm/h  |
| Precipitación                                  | PREc 35.85 mm |
| Radio máximo                                   | Rmax 22.22 km |
| Longitud de recorrido                          | Lrec 13.84 km |
| Hora de inicio de tormenta                     | HI 15.60 hora |
| Tiempo de desfase                              | Td 1.29 hora  |
| Coefficiente de patrón temporal                | k2 0.33       |
| Velocidad de inicio Vi                         | Vi 17.28 km/h |
| Velocidad de fin Vf                            | Vf -2.07 km/h |
| Latitud del centro de tormenta(CTc)            | 774000        |
| Longitud del centro de tormenta(CTc)           | 9979500       |

## ESCURRIMIENTO

|                         |          |
|-------------------------|----------|
| Abstracciones iniciales | 11.15 mm |
| Número de curva         | CN 82    |

## RESULTADOS

|                                 |                           |
|---------------------------------|---------------------------|
| Caudal Pico                     | Qp 5.11 m <sup>3</sup> /s |
| Volumen de crecida              | Vol 45334 m <sup>3</sup>  |
| Precipitación Efectiva          | Pefec 6.95 mm             |
| Hora Pico                       | Hp 2.57 h                 |
| Hora de inicio de escurrimiento | He 1.02 h                 |
| Tiempo Relativo al Pico         | Tp 1.55 h                 |

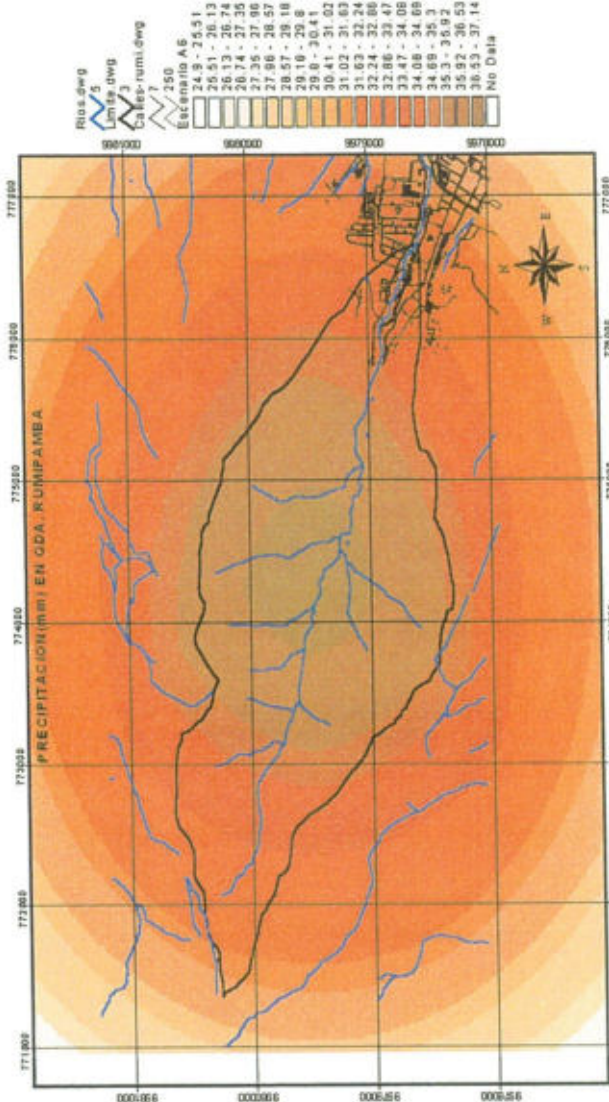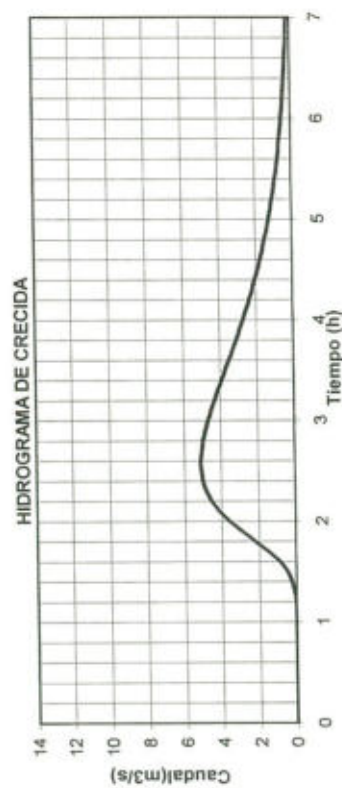



ESCENARIO:

A7

MICROCUCIENCA:

Rumipamba

Area:

6.52 km<sup>2</sup>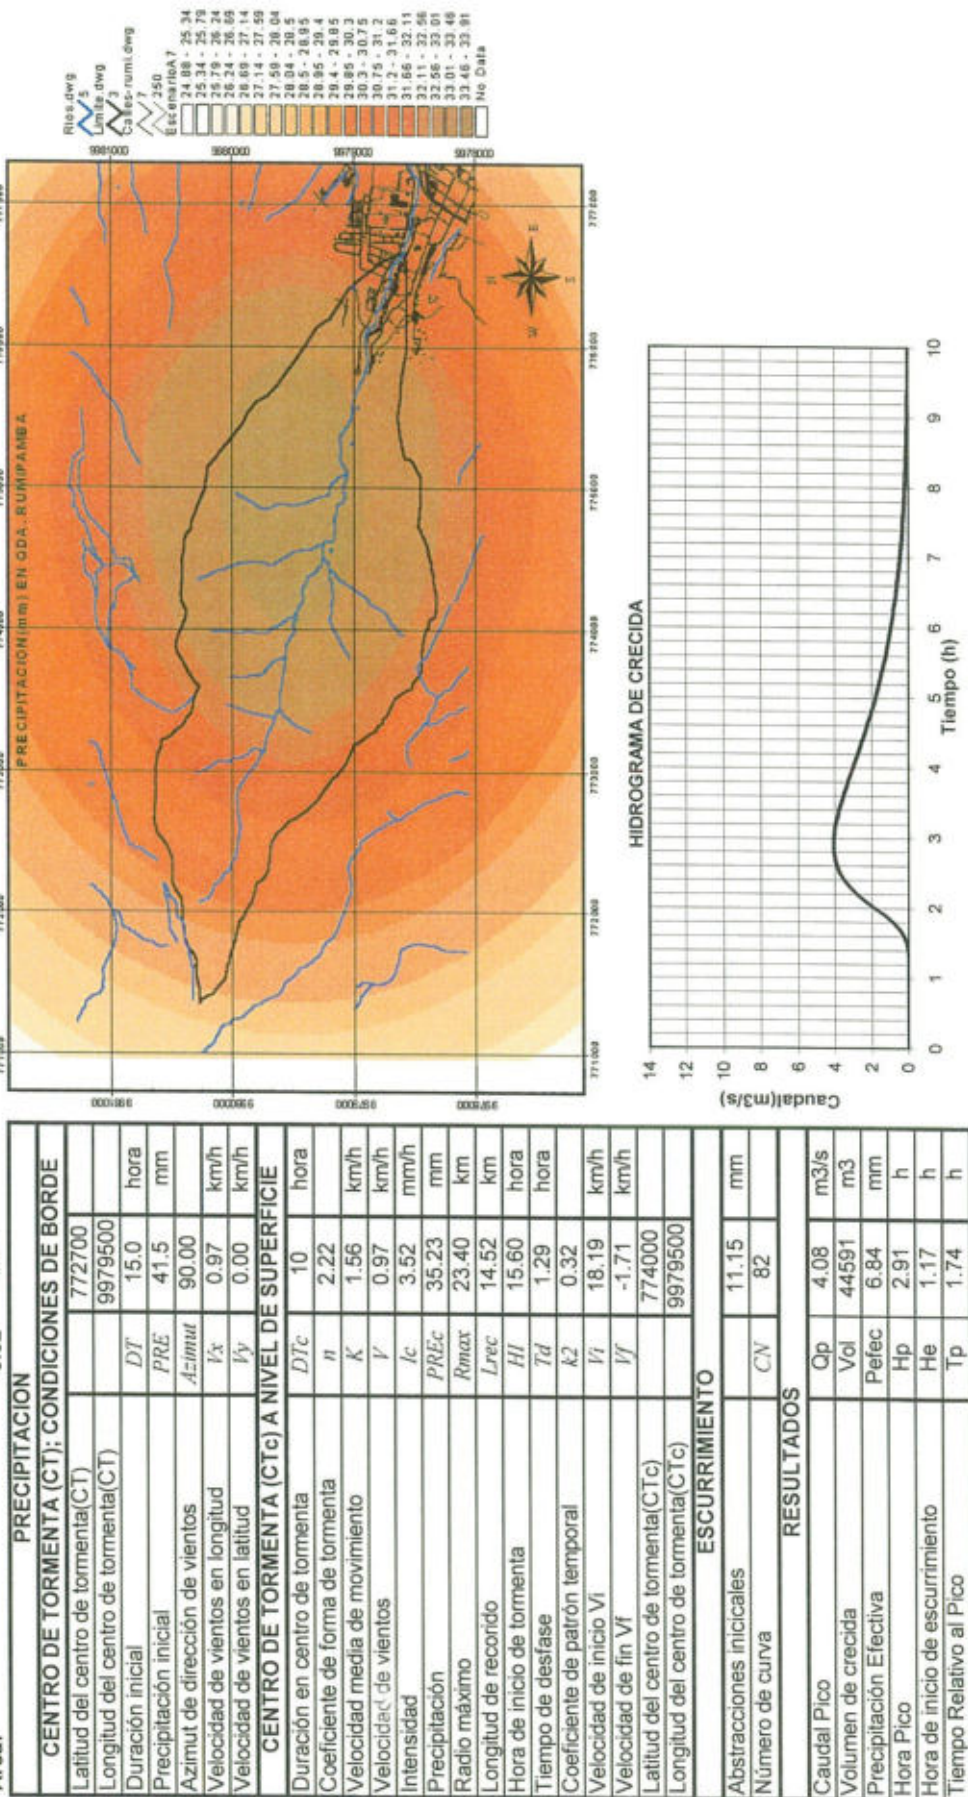

ESCENARIO: A8

MICROCUENCA: Rumipamba  
Area: 6.52 km<sup>2</sup>

| PRECIPITACION                                  |               |
|------------------------------------------------|---------------|
| CENTRO DE TORMENTA (CT); CONDICIONES DE BORDE  |               |
| Latitud del centro de tormenta(CT)             | 772600        |
| Longitud del centro de tormenta(CT)            | 9979500       |
| Duración inicial                               | DT 18.0 hora  |
| Precipitación inicial                          | PRE 40.4 mm   |
| Azimet de dirección de vientos                 | Azimut 90.00  |
| Velocidad de vientos en longitud               | Vx 0.84 km/h  |
| Velocidad de vientos en latitud                | Vy 0.00 km/h  |
| CENTRO DE TORMENTA (CTc) A NIVEL DE SUPERFICIE |               |
| Duración en centro de tormenta                 | DTc 12 hora   |
| Coefficiente de forma de tormenta              | n 2.10        |
| Velocidad media de movimiento                  | K 1.36 km/h   |
| Velocidad de vientos                           | V 0.84 km/h   |
| Intensidad                                     | Ic 2.89 mm/h  |
| Precipitación                                  | PREc 34.73 mm |
| Radio máximo                                   | Rmax 24.41 km |
| Longitud de recorrido                          | Lrec 15.09 km |
| Hora de inicio de tormenta                     | HJ 15.60 hora |
| Tiempo de desfase                              | Td 1.29 hora  |
| Coefficiente de patrón temporal                | k2 0.31       |
| Velocidad de inicio Vi                         | Vi 18.98 km/h |
| Velocidad de fin Vf                            | Vf -1.46 km/h |
| ESCURRIMIENTO                                  |               |
| CENTRO DE TORMENTA(CTc)                        |               |
| Latitud del centro de tormenta(CTc)            | 774000        |
| Longitud del centro de tormenta(CTc)           | 9979500       |
| ABSTRACCIONES INICIALES                        |               |
| Número de curva                                | CN 82         |
| RESULTADOS                                     |               |
| Caudal Pico                                    | Qp 3.37 m3/s  |
| Volumen de crecida                             | Vol 43290 m3  |
| Precipitación Efectiva                         | Pefec 6.64 mm |
| Hora Pico                                      | Hp 3.23 h     |
| Hora de inicio de escurrimiento                | He 1.31 h     |
| Tiempo Relativo al Pico                        | Tp 1.92 h     |

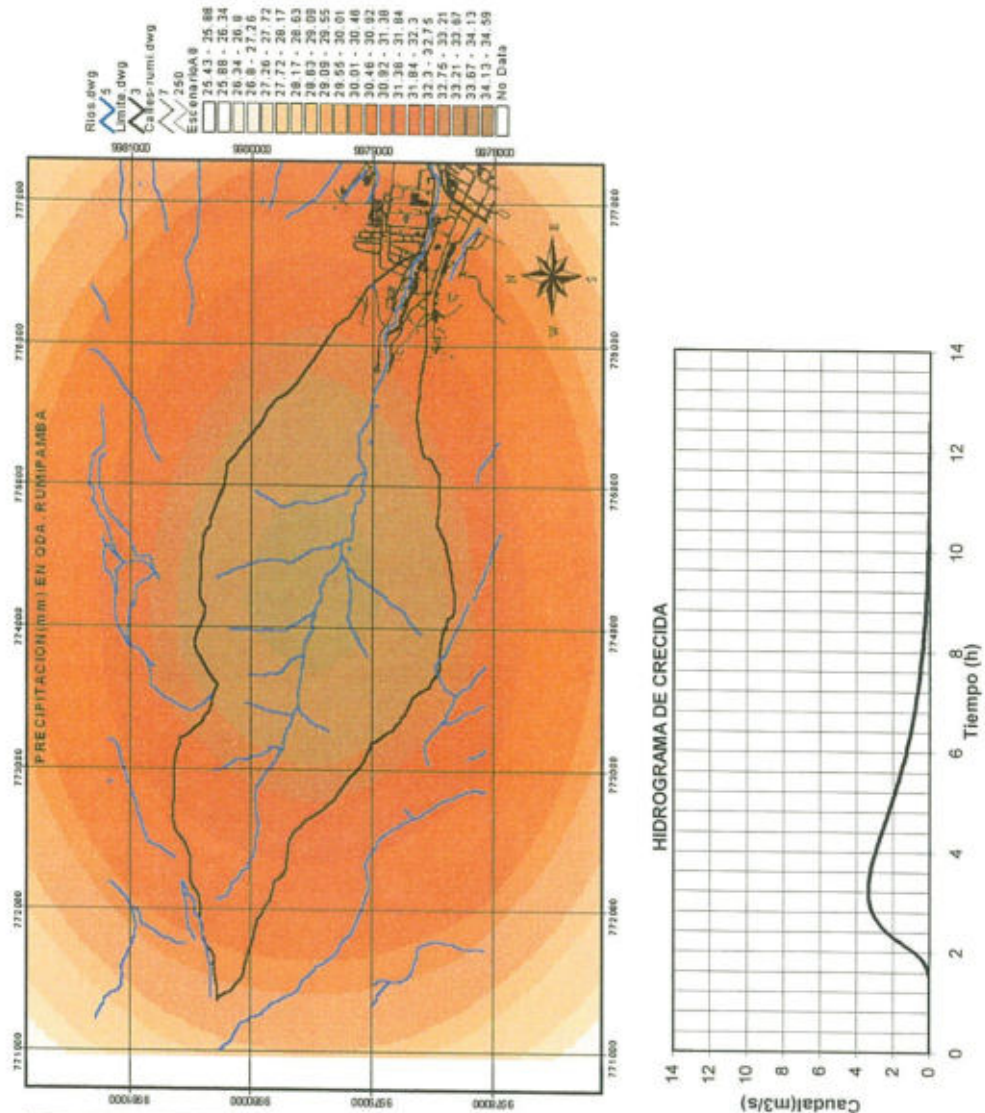



## ESCENARIO: B CAMBIO DEL TIEMPO DE DESFASE

MICROCUENCA: Rumipamba

Area: 6.52 km<sup>2</sup>

| ESCENARIO                                             | Símbolo | B1      | B2      | B3      | Unidad            |
|-------------------------------------------------------|---------|---------|---------|---------|-------------------|
| <b>PRECIPITACION</b>                                  |         |         |         |         |                   |
| <b>CENTRO DE TORMENTA (CT); CONDICIONES DE BORDE</b>  |         |         |         |         |                   |
| Latitud del centro de tormenta(CT)                    |         | 774000  | 774000  | 774000  |                   |
| Longitud del centro de tormenta(CT)                   |         | 9979500 | 9979500 | 9979500 |                   |
| Duración inicial                                      | DT      | 2.7     | 2.7     | 2.7     | hora              |
| Precipitación inicial                                 | PRE     | 45.5    | 45.5    | 45.5    | mm                |
| Azimut de dirección de vientos                        | Azimut  | 90.00   | 90.00   | 90.00   |                   |
| Velocidad de vientos en longitud                      | Vx      | 3.43    | 3.43    | 3.43    | km/h              |
| Velocidad de vientos en latitud                       | Vy      | 0.00    | 0.00    | 0.00    | km/h              |
| <b>CENTRO DE TORMENTA (CTc) A NIVEL DE SUPERFICIE</b> |         |         |         |         |                   |
| Duración en centro de tormenta                        | DTc     | 2       | 1.80    | 2.66    | hora              |
| Coeficiente de forma de tormenta                      | n       | 3.59    | 3.59    | 3.59    |                   |
| Velocidad media de movimiento                         | K       | 5.37    | 5.37    | 5.37    | km/h              |
| Velocidad de vientos                                  | V       | 3.43    | 3.43    | 3.43    | km/h              |
| Intensidad                                            | Ic      | 19.97   | 19.50   | 21.13   | mm/h              |
| Precipitación                                         | PREc    | 39.95   | 35.10   | 56.20   | mm                |
| Radio máximo                                          | Rmax    | 14.30   | 14.30   | 14.30   | km                |
| Longitud de recorrido                                 | Lrec    | 9.14    | 9.14    | 9.14    | km                |
| Hora de inicio de tormenta                            | HI      | 15.60   | 15.60   | 15.60   | hora              |
| Tiempo de desfase                                     | Td      | 1.29    | 0.00    | 2.70    | hora              |
| Coeficiente de patrón temporal                        | k2      | 0.39    | 0.39    | 0.39    |                   |
| Velocidad de inicio Vi                                | Vi      | 11.12   | 0.00    | 5.29    | km/h              |
| Velocidad de fin Vf                                   | Vf      | -10.41  | -5.37   | 0       | km/h              |
| Latitud del centro de tormenta(CTc)                   |         | 774000  | 775100  | 774000  |                   |
| Longitud del centro de tormenta(CTc)                  |         | 9979500 | 9979500 | 9979500 |                   |
| <b>ESCURRIMIENTO</b>                                  |         |         |         |         |                   |
| Abstracciones iniciales                               |         | 11.15   | 11.15   | 11.15   | mm                |
| Número de curva                                       | CN      | 82      | 82      | 82      |                   |
| <b>RESULTADOS</b>                                     |         |         |         |         |                   |
| Caudal Pico                                           | Qp      | 10.58   | 9.70    | 12.82   | m <sup>3</sup> /s |
| Volumen de crecida                                    | Vol     | 35410   | 29658   | 52505   | m <sup>3</sup>    |
| Precipitación Efectiva                                | Pefec   | 5.43    | 4.55    | 8.05    | mm                |
| Hora Pico                                             | Hp      | 1.44    | 1.31    | 1.57    | h                 |
| Hora de inicio de escurrimiento                       | He      | 0.23    | 0.29    | 0.64    | h                 |
| Tiempo Relativo al Pico                               | Tp      | 1.21    | 1.02    | 0.93    | h                 |

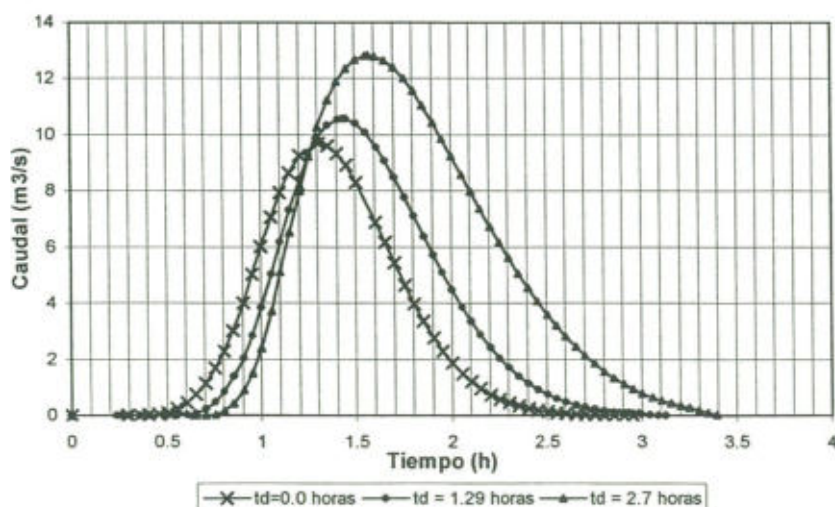

**ESCENARIO: C**  
**CAMBIO DEL PERIODO DE RETORNO**

**MICROCUENCA:** Rumipamba

**Area:** 6.52 km<sup>2</sup>

| ESCENARIO                                             | Símbolo | C1      | C2      | C3      | Unidad            |
|-------------------------------------------------------|---------|---------|---------|---------|-------------------|
| <b>PRECIPITACION</b>                                  |         |         |         |         |                   |
| <b>CENTRO DE TORMENTA (CT); CONDICIONES DE BORDE</b>  |         |         |         |         |                   |
| Latitud del centro de tormenta(CT)                    |         | 774000  | 774000  | 774000  |                   |
| Longitud del centro de tormenta(CT)                   |         | 9979500 | 9979500 | 9979500 |                   |
| Duración inicial                                      | DT      | 2.7     | 2.7     | 2.7     | hora              |
| Precipitación inicial                                 | PRE     | 45.5    | 56.9    | 63.0    | mm                |
| Azimut de dirección de vientos                        | Azimut  | 90      | 90      | 90      |                   |
| Velocidad de vientos en longitud                      | Vx      | 3.43    | 3.43    | 3.43    | km/h              |
| Velocidad de vientos en latitud                       | Vy      | 0.00    | 0.00    | 0.0     | km/h              |
| <b>CENTRO DE TORMENTA (CTc) A NIVEL DE SUPERFICIE</b> |         |         |         |         |                   |
| Duración en centro de tormenta                        | DTc     | 2       | 2       | 2       | hora              |
| Coefficiente de forma de tormenta                     | n       | 3.59    | 3.59    | 3.59    |                   |
| Velocidad media de movimiento                         | K       | 5.37    | 5.37    | 5.37    | km/h              |
| Velocidad de vientos                                  | V       | 3.43    | 3.43    | 3.43    | km/h              |
| Período de retorno                                    | Tr      | 7.1     | 25.00   | 50.00   | años              |
| Intensidad                                            | Ic      | 19.98   | 24.83   | 27.53   | mm/h              |
| Precipitación                                         | PREc    | 39.95   | 49.66   | 55.07   | mm                |
| Radio máximo                                          | Rmax    | 14.30   | 14.30   | 14.30   | km                |
| Longitud de recorrido                                 | Lrec    | 9.14    | 9.14    | 9.14    | km                |
| Hora de inicio de tormenta                            | HI      | 15.6    | 15.60   | 15.60   | hora              |
| Tiempo de desfase                                     | Td      | 1.29    | 1.29    | 1.29    | hora              |
| Coefficiente de patrón temporal                       | k2      | 0.39    | 0.39    | 0.39    |                   |
| Velocidad de inicio Vi                                | Vi      | 11.12   | 11.12   | 11.12   | km/h              |
| Velocidad de fin Vf                                   | Vf      | -10.41  | -10.41  | -10.41  | km/h              |
| Latitud del centro de tormenta(CTc)                   |         | 774000  | 774000  | 774000  |                   |
| Longitud del centro de tormenta(CTc)                  |         | 9979500 | 9979500 | 9979500 |                   |
| <b>ESCURRIMIENTO</b>                                  |         |         |         |         |                   |
| Abstracciones iniciales                               |         | 11.15   | 11.15   | 11.15   |                   |
| Número de curva                                       | CN      | 82      | 82      | 82      | mm/h              |
| <b>RESULTADOS</b>                                     |         |         |         |         |                   |
| Caudal pico                                           | Qp      | 10.58   | 18.03   | 22.50   | m <sup>3</sup> /s |
| Volumen de crecida                                    | Vol     | 35410   | 61595   | 77459   | m <sup>3</sup>    |
| Precipitación efectiva                                | Pefec   | 5.43    | 9.4     | 11.9    | mm                |
| Hora pico                                             | Hp      | 1.44    | 1.4     | 1.4     | h                 |
| Hora de inicio de escurrimiento                       | He      | 0.50    | 0.4     | 0.4     | h                 |
| Tiempo relativo al pico                               | Tp      | 0.94    | 1.0     | 1.0     | h                 |

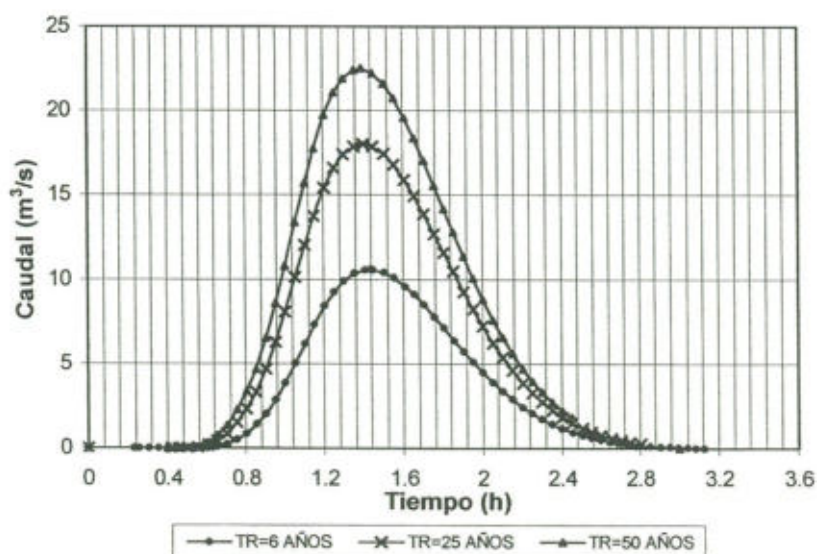



## **ANEXO G**

### **REPORTE DE LA MODELACIÓN DEL FENÓMENO PRECIPITACIÓN ESCURRIMIENTO UTILIZANDO EL PROGRAMA HIDRO1**

**RESULTADOS DE PROGRAMA COMPUTACIONAL HIDRO1****Proyecto : QDA. RUMIPAMBA****Fecha : JULIO/2003****CRECIDA DE AJUSTE****DATOS****Información General**

Intervalo de tiempo : .0833 [horas]  
 Número de subcuencas : 1  
 Número de tramos de río : 0  
 Número de reservorios : 0  
 Dato para las subcuencas : Precipitación total  
 Método para pérdidas : S.C.S.  
 Método para el H.U. : Triangular (SCS)

**Información de subcuencas**

| Subcuenca<br># | Precipitación<br>[mm] | Duración<br>[dt] | dyl{*}<br>[dt] | # de curva<br>(Huff) |
|----------------|-----------------------|------------------|----------------|----------------------|
| 1              | 42.00                 | 12               | 0              | 5                    |

{\*} dyl=Desfase de tiempo relativo al inicio de la simulación

**Parámetros para el SCS**

| Subcuenca<br># | Curva CN<br># | Abstracc.Iniciales<br>(coef. c) |
|----------------|---------------|---------------------------------|
| 1              | 82            | 0.20                            |

**Datos para el H.U. Triangular (SCS)**

| Subcuenca<br># | Area<br>[Kmi] | Curva CN<br># | Long.Cauce<br>[Km] | Pendiente<br>[%] |
|----------------|---------------|---------------|--------------------|------------------|
| 1              | 6.52          | 82            | 6.24               | 31.40            |

**Datos para el Flujo Base (FB)**

| Subcuenca<br># | FB Inicial<br>[m3/s] | FB al t pico<br>[m3/s] | FB al t base<br>[m3/s] |
|----------------|----------------------|------------------------|------------------------|
| 1              | 0.00                 | 0.00                   | 0.00                   |

**Proceso de simulación**

| Rutina     | Elemento | Código de impresión |
|------------|----------|---------------------|
| Hidrograma | 1        | 1                   |

**RESULTADOS****CALCULO DEL HIDROGRAMA: SUBCUENCA 1**

Método: Huff

Método: S.C.S.

| Tiempo<br>[h] | Hieto.Total<br>[mm/h] | Hieto.Efectivo<br>[mm/h] |
|---------------|-----------------------|--------------------------|
| 0.00          | 0.00                  | 0.00                     |
| 0.08          | 29.52                 | 0.00                     |
| 0.17          | 69.63                 | 0.00                     |
| 0.25          | 73.55                 | 7.85                     |
| 0.33          | 59.16                 | 14.15                    |
| 0.42          | 40.09                 | 12.54                    |
| 0.50          | 25.66                 | 9.10                     |
| 0.58          | 20.92                 | 8.07                     |
| 0.67          | 26.64                 | 11.25                    |



|                          |       |            |
|--------------------------|-------|------------|
| 0.75                     | 39.28 | 18.48      |
| 0.83                     | 51.05 | 26.79      |
| 0.92                     | 49.85 | 28.42      |
| 1.00                     | 18.85 | 11.04      |
| Precipitación total =    |       | 42.00 [mm] |
| Precipitación efectiva = |       | 12.30 [mm] |

Método: H. U. Triangular (SCS)

| Tiempo<br>[h] | Caudal<br>[m3/s] |
|---------------|------------------|
| 0.17          | 0.00             |
| 0.25          | 0.09             |
| 0.33          | 0.44             |
| 0.42          | 1.09             |
| 0.50          | 2.00             |
| 0.58          | 3.11             |
| 0.67          | 4.43             |
| 0.75          | 6.11             |
| 0.83          | 8.29             |
| 0.92          | 10.87            |
| 1.00          | 13.43            |
| 1.08          | 15.65            |
| 1.17          | 17.51            |
| 1.25          | 19.06            |
| 1.33          | 20.19            |
| 1.42          | 20.68            |
| 1.50          | 20.24            |
| 1.58          | 18.79            |
| 1.67          | 16.82            |
| 1.75          | 14.77            |
| 1.83          | 12.72            |
| 1.92          | 10.68            |
| 2.00          | 8.75             |
| 2.08          | 7.02             |
| 2.17          | 5.46             |
| 2.25          | 4.02             |
| 2.33          | 2.70             |
| 2.42          | 1.55             |
| 2.50          | 0.66             |
| 2.58          | 0.14             |
| 2.67          | 0.00             |

Caudal pico = 20.68 [m3/s]  
 Tiempo pico = 1.42 [h]  
 Volumen = 8.0152E+04 [m3]

**RESULTADOS DE PROGRAMA COMPUTACIONAL HIDRO1****Proyecto : QDA. RUMIPAMBA****Fecha : JULIO/2003****ESCENARIO DE CRECIDA A1****DATOS****Información General**

Intervalo de tiempo : .0833 [horas]  
 Número de subcuencas : 1  
 Número de tramos de río : 0  
 Número de reservorios : 0  
 Dato para las subcuencas : Precipitación total  
 Método para pérdidas : S.C.S.  
 Método para el H.U. : Triangular (SCS)

**Información de subcuencas**

| Subcuenca<br># | Precipitación<br>[mm] | Duración<br>[dt] | dyl{*}<br>[dt] | # de curva<br>(Huff) |
|----------------|-----------------------|------------------|----------------|----------------------|
| 1              | 41.08                 | 17               | 0              | 3                    |

{\*} dyl=Desfase de tiempo relativo al inicio de la simulación

Parámetros para el SCS

| Subcuenca<br># | Curva CN<br># | Abstracc.Iniciales<br>(coef. c) |
|----------------|---------------|---------------------------------|
| 1              | 82            | 0.20                            |

Datos para el H.U. Triangular (SCS)

| Subcuenca<br># | Area<br>[Km <sup>2</sup> ] | Curva CN<br># | Long.Cauce<br>[Km] | Pendiente<br>[%] |
|----------------|----------------------------|---------------|--------------------|------------------|
| 1              | 6.52                       | 82            | 6.24               | 31.40            |

Datos para el Flujo Base (FB)

| Subcuenca<br># | FB Inicial<br>[m <sup>3</sup> /s] | FB al t pico<br>[m <sup>3</sup> /s] | FB al t base<br>[m <sup>3</sup> /s] |
|----------------|-----------------------------------|-------------------------------------|-------------------------------------|
| 1              | 0.00                              | 0.00                                | 0.00                                |

**Proceso de simulación**

| Rutina     | Elemento | Código de impresión |
|------------|----------|---------------------|
| Hidrograma | 1        | 1                   |

**R E S U L T A D O S****CALCULO DEL HIDROGRAMA: SUBCUENCA 1**

Método: H u f f

Método: S.C.S.

| Tiempo<br>[h] | Hieto.Total<br>[mm/h] | Hieto.Efectivo<br>[mm/h] |
|---------------|-----------------------|--------------------------|
| 0.00          | 0.00                  | 0.00                     |
| 0.08          | 64.87                 | 0.00                     |
| 0.17          | 70.17                 | 0.24                     |
| 0.25          | 69.42                 | 12.61                    |
| 0.33          | 64.29                 | 19.76                    |
| 0.42          | 56.26                 | 22.22                    |
| 0.50          | 46.62                 | 21.24                    |
| 0.58          | 36.46                 | 18.11                    |
| 0.67          | 26.67                 | 13.98                    |
| 0.75          | 17.97                 | 9.73                     |
| 0.83          | 10.87                 | 5.99                     |



|                          |      |            |
|--------------------------|------|------------|
| 0.92                     | 5.68 | 3.16       |
| 1.00                     | 2.55 | 1.42       |
| 1.08                     | 1.40 | 0.78       |
| 1.17                     | 1.98 | 1.11       |
| 1.25                     | 3.83 | 2.16       |
| 1.33                     | 6.32 | 3.60       |
| 1.42                     | 7.80 | 4.50       |
| Precipitación total =    |      | 41.08 [mm] |
| Precipitación efectiva = |      | 11.71 [mm] |

Método: H. U. Triangular (SCS)

| Tiempo | Caudal |
|--------|--------|
| [h]    | [m3/s] |
| 0.08   | 0.00   |
| 0.17   | 0.00   |
| 0.25   | 0.15   |
| 0.33   | 0.68   |
| 0.42   | 1.70   |
| 0.50   | 3.21   |
| 0.58   | 5.19   |
| 0.67   | 7.54   |
| 0.75   | 10.16  |
| 0.83   | 12.93  |
| 0.92   | 15.41  |
| 1.00   | 17.27  |
| 1.08   | 18.35  |
| 1.17   | 18.66  |
| 1.25   | 18.32  |
| 1.33   | 17.51  |
| 1.42   | 16.41  |
| 1.50   | 15.12  |
| 1.58   | 13.69  |
| 1.67   | 12.20  |
| 1.75   | 10.67  |
| 1.83   | 9.10   |
| 1.92   | 7.48   |
| 2.00   | 5.91   |
| 2.08   | 4.47   |
| 2.17   | 3.30   |
| 2.25   | 2.42   |
| 2.33   | 1.80   |
| 2.42   | 1.36   |
| 2.50   | 1.05   |
| 2.58   | 0.82   |
| 2.67   | 0.63   |
| 2.75   | 0.46   |
| 2.83   | 0.31   |
| 2.92   | 0.17   |
| 3.00   | 0.06   |
| 3.08   | 0.00   |

Caudal pico = 18.66 [m3/s]  
 Tiempo pico = 1.17 [h]  
 Volumen = 7.6320E+04 [m3]

**RESULTADOS DE PROGRAMA COMPUTACIONAL HIDRO1****Proyecto : QDA. RUMIPAMBA****Fecha : JULIO/2003****ESCENARIO DE CRECIDA A2****DATOS****Información General**

Intervalo de tiempo : .0833 [horas]  
 Número de subcuencas : 1  
 Número de tramos de río : 0  
 Número de reservorios : 0  
 Dato para las subcuencas : Precipitación total  
 Método para pérdidas : S.C.S.  
 Método para el H.U. : Triangular (SCS)

**Información de subcuencas**

| Subcuenca<br># | Precipitación<br>[mm] | Duración<br>[dt] | dyt{*}<br>[dt] | # de curva<br>(Huff) |
|----------------|-----------------------|------------------|----------------|----------------------|
| 1              | 39.95                 | 24               | 0              | 3                    |

{\*} dyt=Desfase de tiempo relativo al inicio de la simulación

**Parámetros para el SCS**

| Subcuenca<br># | Curva CN<br># | Abstracc.Iniciales<br>(coef. c) |
|----------------|---------------|---------------------------------|
| 1              | 82            | 0.20                            |

**Datos para el H.U. Triangular (SCS)**

| Subcuenca<br># | Area<br>[Km <sup>2</sup> ] | Curva CN<br># | Long.Cauce<br>[Km] | Pendiente<br>[%] |
|----------------|----------------------------|---------------|--------------------|------------------|
| 1              | 6.52                       | 82            | 6.24               | 31.40            |

**Datos para el Flujo Base (FB)**

| Subcuenca<br># | FB Inicial<br>[m <sup>3</sup> /s] | FB al t pico<br>[m <sup>3</sup> /s] | FB al t base<br>[m <sup>3</sup> /s] |
|----------------|-----------------------------------|-------------------------------------|-------------------------------------|
| 1              | 0.00                              | 0.00                                | 0.00                                |

**Proceso de simulación**

| Rutina     | Elemento | Código de impresión |
|------------|----------|---------------------|
| Hidrograma | 1        | 1                   |

**RESULTADOS****CALCULO DEL HIDROGRAMA: SUBCUENCA 1****Método: H u f f****Método: S.C.S.**

| Tiempo<br>[h] | Hieto.Total<br>[mm/h] | Hieto.Efectivo<br>[mm/h] |
|---------------|-----------------------|--------------------------|
| 0.00          | 0.00                  | 0.00                     |
| 0.08          | 43.84                 | 0.00                     |
| 0.17          | 47.42                 | 0.00                     |
| 0.25          | 48.63                 | 0.86                     |
| 0.33          | 47.93                 | 6.88                     |
| 0.42          | 45.70                 | 11.08                    |
| 0.50          | 42.32                 | 13.51                    |



|      |       |       |
|------|-------|-------|
| 0.58 | 38.12 | 14.45 |
| 0.67 | 33.42 | 14.21 |
| 0.75 | 28.47 | 13.11 |
| 0.83 | 23.52 | 11.46 |
| 0.92 | 18.76 | 9.52  |
| 1.00 | 14.37 | 7.50  |
| 1.08 | 10.48 | 5.58  |
| 1.17 | 7.19  | 3.88  |
| 1.25 | 4.58  | 2.49  |
| 1.33 | 2.68  | 1.46  |
| 1.42 | 1.48  | 0.81  |
| 1.50 | 0.96  | 0.53  |
| 1.58 | 1.06  | 0.58  |
| 1.67 | 1.67  | 0.92  |
| 1.75 | 2.66  | 1.47  |
| 1.83 | 3.88  | 2.16  |
| 1.92 | 5.11  | 2.86  |
| 2.00 | 5.34  | 3.02  |

Precipitación total = 39.95 [mm]  
 Precipitación efectiva = 10.69 [mm]

Método: H. U. Triangular (SCS)

| Tiempo<br>[h] | Caudal<br>[m3/s] |
|---------------|------------------|
| 0.17          | 0.00             |
| 0.25          | 0.01             |
| 0.42          | 0.42             |
| 0.58          | 1.93             |
| 0.75          | 4.75             |
| 0.92          | 8.65             |
| 1.08          | 12.49            |
| 1.25          | 14.89            |
| 1.42          | 15.40            |
| 1.58          | 14.27            |
| 1.75          | 12.05            |
| 1.92          | 9.38             |
| 2.08          | 6.82             |
| 2.25          | 4.80             |
| 2.42          | 3.42             |
| 2.58          | 2.45             |
| 2.75          | 1.67             |
| 2.83          | 1.40             |
| 2.92          | 1.17             |
| 3.00          | 0.98             |
| 3.08          | 0.81             |
| 3.17          | 0.65             |
| 3.25          | 0.50             |
| 3.33          | 0.36             |
| 3.42          | 0.23             |
| 3.50          | 0.12             |
| 3.58          | 0.04             |
| 3.67          | 0.00             |

Caudal pico = 15.40 [m3/s]  
 Tiempo pico = 1.42 [h]  
 Volumen = 6.9655E+04 [m3]

**RESULTADOS DE PROGRAMA COMPUTACIONAL HIDRO1**

Proyecto : QDA. RUMIPAMBA

Fecha : JULIO/2003

ESCENARIO DE CRECIDA A3

**DATOS**

## Información General

Intervalo de tiempo : .0833 [horas]  
 Número de subcuencas : 1  
 Número de tramos de río : 0  
 Número de reservorios : 0  
 Dato para las subcuencas : Precipitación total  
 Método para pérdidas : S.C.S.  
 Método para el H.U. : Triangular (SCS)

## Información de subcuencas

| Subcuenca<br># | Precipitación<br>[mm] | Duración<br>[dt] | dyt{*}<br>[dt] | # de curva<br>(Huff) |
|----------------|-----------------------|------------------|----------------|----------------------|
| 1              | 38.70                 | 36               | 0              | 2                    |

{\*} dyt=Desfase de tiempo relativo al inicio de la simulación

## Parámetros para el SCS

| Subcuenca<br># | Curva CN<br># | Abstracc.Iniciales<br>(coef. c) |
|----------------|---------------|---------------------------------|
| 1              | 82            | 0.20                            |

## Datos para el H.U. Triangular (SCS)

| Subcuenca<br># | Area<br>[Km <sup>2</sup> ] | Curva CN<br># | Long.Cauce<br>[Km] | Pendiente<br>[%] |
|----------------|----------------------------|---------------|--------------------|------------------|
| 1              | 6.52                       | 82            | 6.24               | 31.40            |

## Datos para el Flujo Base (FB)

| Subcuenca<br># | FB Inicial<br>[m <sup>3</sup> /s] | FB al t pico<br>[m <sup>3</sup> /s] | FB al t base<br>[m <sup>3</sup> /s] |
|----------------|-----------------------------------|-------------------------------------|-------------------------------------|
| 1              | 0.00                              | 0.00                                | 0.00                                |

## Proceso de simulación

| Rutina     | Elemento | Código de impresión |
|------------|----------|---------------------|
| Hidrograma | 1        | 1                   |

**R E S U L T A D O S**

## CALCULO DEL HIDROGRAMA: SUBCUENCA 1

Método: H u f f

Método: S.C.S.

| Tiempo<br>[h] | Hieto.Total<br>[mm/h] | Hieto.Efectivo<br>[mm/h] |
|---------------|-----------------------|--------------------------|
| 0.25          | 42.85                 | 0.64                     |
| 0.33          | 39.46                 | 4.77                     |
| 0.42          | 36.16                 | 7.36                     |
| 0.50          | 32.95                 | 8.87                     |
| 0.58          | 29.85                 | 9.61                     |
| 0.67          | 26.88                 | 9.80                     |



|      |       |      |
|------|-------|------|
| 0.75 | 24.03 | 9.60 |
| 0.83 | 21.33 | 9.13 |
| 0.92 | 18.77 | 8.48 |
| 1.00 | 16.38 | 7.71 |
| 1.08 | 14.15 | 6.89 |
| 1.17 | 12.08 | 6.04 |
| 1.25 | 10.19 | 5.20 |
| 1.33 | 8.47  | 4.40 |
| 1.42 | 6.92  | 3.64 |
| 1.50 | 5.55  | 2.95 |
| 1.58 | 4.35  | 2.33 |
| 1.67 | 3.31  | 1.78 |
| 1.75 | 2.44  | 1.32 |
| 1.83 | 1.72  | 0.93 |
| 1.92 | 1.16  | 0.63 |
| 2.00 | 0.73  | 0.40 |
| 2.08 | 0.43  | 0.24 |
| 2.17 | 0.26  | 0.14 |
| 2.25 | 0.19  | 0.10 |
| 2.33 | 0.22  | 0.12 |
| 2.42 | 0.32  | 0.18 |
| 2.50 | 0.49  | 0.27 |
| 2.58 | 0.70  | 0.38 |
| 2.67 | 0.94  | 0.51 |
| 2.75 | 1.18  | 0.65 |
| 2.83 | 1.41  | 0.77 |
| 2.92 | 1.59  | 0.88 |
| 3.00 | 1.04  | 0.57 |

Precipitación total = 38.70 [mm]  
 Precipitación efectiva = 9.77 [mm]

Método: H. U. Triangular (SCS)

| Tiempo<br>[h] | Caudal<br>[m3/s] |
|---------------|------------------|
| 0.17          | 0.00             |
| 0.25          | 0.01             |
| 0.33          | 0.08             |
| 0.42          | 0.29             |
| 0.50          | 0.69             |
| 0.58          | 1.30             |
| 0.67          | 2.14             |
| 0.75          | 3.20             |
| 0.83          | 4.48             |
| 0.92          | 5.94             |
| 1.00          | 7.43             |
| 1.08          | 8.84             |
| 1.17          | 10.07            |
| 1.25          | 11.09            |
| 1.33          | 11.85            |
| 1.42          | 12.36            |
| 1.50          | 12.59            |
| 1.58          | 12.57            |
| 1.67          | 12.31            |
| 1.75          | 11.83            |
| 1.83          | 11.14            |
| 1.92          | 10.27            |
| 2.00          | 9.27             |
| 2.08          | 8.19             |

|      |      |
|------|------|
| 2.17 | 7.12 |
| 2.25 | 6.08 |
| 2.33 | 5.11 |
| 2.42 | 4.22 |
| 2.50 | 3.44 |
| 2.58 | 2.76 |
| 2.67 | 2.20 |
| 2.75 | 1.75 |
| 2.83 | 1.40 |
| 2.92 | 1.15 |
| 3.00 | 0.98 |
| 3.08 | 0.87 |
| 3.17 | 0.81 |
| 3.25 | 0.77 |
| 3.33 | 0.74 |
| 3.42 | 0.72 |
| 3.50 | 0.68 |
| 3.58 | 0.63 |
| 3.67 | 0.56 |
| 3.75 | 0.49 |
| 3.83 | 0.43 |
| 3.92 | 0.37 |
| 4.00 | 0.31 |
| 4.08 | 0.25 |
| 4.16 | 0.19 |
| 4.25 | 0.14 |
| 4.33 | 0.10 |
| 4.41 | 0.06 |
| 4.50 | 0.03 |
| 4.58 | 0.01 |
| 4.66 | 0.00 |

Caudal pico = 12.59 [m3/s]  
 Tiempo pico = 1.50 [h]  
 Volumen = 6.3656E+04 [m3]



**RESULTADOS DE PROGRAMA COMPUTACIONAL HIDRO1**

Proyecto : QDA. RUMIPAMBA

Fecha : JULIO/2003

ESCENARIO DE CRECIDA A4

**DATOS**

## Información General

Intervalo de tiempo : .0833 [horas]  
 Número de subcuencas : 1  
 Número de tramos de río : 0  
 Número de reservorios : 0  
 Dato para las subcuencas : Precipitación total  
 Método para pérdidas : S.C.S.  
 Método para el H.U. : Triangular (SCS)

## Información de subcuencas

| Subcuenca<br># | Precipitación<br>[mm] | Duración<br>[dt] | dvt{*}<br>[dt] | # de curva<br>(Huff) |
|----------------|-----------------------|------------------|----------------|----------------------|
|----------------|-----------------------|------------------|----------------|----------------------|

|   |       |    |   |   |
|---|-------|----|---|---|
| 1 | 37.84 | 48 | 0 | 2 |
|---|-------|----|---|---|

{\*} dvt=Desfase de tiempo relativo al inicio de la simulación

## Parámetros para el SCS

| Subcuenca<br># | Curva CN<br># | Abstracc.Iniciales<br>(coef. c) |
|----------------|---------------|---------------------------------|
|----------------|---------------|---------------------------------|

|   |    |      |
|---|----|------|
| 1 | 82 | 0.20 |
|---|----|------|

## Datos para el H.U. Triangular (SCS)

| Subcuenca<br># | Area<br>[Km <sup>2</sup> ] | Curva CN<br># | Long.Cauce<br>[Km] | Pendiente<br>[%] |
|----------------|----------------------------|---------------|--------------------|------------------|
|----------------|----------------------------|---------------|--------------------|------------------|

|   |      |    |      |       |
|---|------|----|------|-------|
| 1 | 6.52 | 82 | 6.24 | 31.40 |
|---|------|----|------|-------|

## Datos para el Flujo Base (FB)

| Subcuenca<br># | FB Inicial<br>[m <sup>3</sup> /s] | FB al t pico<br>[m <sup>3</sup> /s] | FB al t base<br>[m <sup>3</sup> /s] |
|----------------|-----------------------------------|-------------------------------------|-------------------------------------|
|----------------|-----------------------------------|-------------------------------------|-------------------------------------|

|   |      |      |      |
|---|------|------|------|
| 1 | 0.00 | 0.00 | 0.00 |
|---|------|------|------|

## Proceso de simulación

| Rutina | Elemento | Código de impresión |
|--------|----------|---------------------|
|--------|----------|---------------------|

|            |   |   |
|------------|---|---|
| Hidrograma | 1 | 1 |
|------------|---|---|

**R E S U L T A D O S**

CALCULO DEL HIDROGRAMA: SUBCUENCA 1

Método: H u f f

Método: S.C.S.

| Tiempo<br>[h] | Hieto.Total<br>[mm/h] | Hieto.Efectivo<br>[mm/h] |
|---------------|-----------------------|--------------------------|
| 0.00          | 0.00                  | 0.00                     |
| 0.08          | 36.83                 | 0.00                     |
| 0.17          | 34.91                 | 0.00                     |
| 0.25          | 33.00                 | 0.00                     |
| 0.33          | 31.11                 | 0.18                     |
| 0.42          | 29.25                 | 2.55                     |
| 0.50          | 27.42                 | 4.24                     |
| 0.58          | 25.62                 | 5.41                     |
| 0.67          | 23.87                 | 6.18                     |
| 0.75          | 22.17                 | 6.64                     |
| 0.83          | 20.51                 | 6.85                     |

|      |       |      |
|------|-------|------|
| 0.92 | 18.91 | 6.88 |
| 1.00 | 17.37 | 6.76 |
| 1.08 | 15.88 | 6.53 |
| 1.17 | 14.45 | 6.22 |
| 1.25 | 13.09 | 5.85 |
| 1.33 | 11.80 | 5.44 |
| 1.42 | 10.57 | 5.00 |
| 1.50 | 9.41  | 4.55 |
| 1.58 | 8.32  | 4.10 |
| 1.67 | 7.31  | 3.66 |
| 1.75 | 6.36  | 3.23 |
| 1.83 | 5.49  | 2.81 |
| 1.92 | 4.68  | 2.42 |
| 2.00 | 3.95  | 2.06 |
| 2.08 | 3.29  | 1.73 |
| 2.17 | 2.70  | 1.42 |
| 2.25 | 2.17  | 1.15 |
| 2.33 | 1.71  | 0.91 |
| 2.42 | 1.32  | 0.70 |
| 2.50 | 0.99  | 0.53 |
| 2.58 | 0.72  | 0.38 |
| 2.67 | 0.50  | 0.27 |
| 2.75 | 0.34  | 0.18 |
| 2.83 | 0.23  | 0.12 |
| 2.92 | 0.16  | 0.09 |
| 3.00 | 0.14  | 0.07 |
| 3.08 | 0.15  | 0.08 |
| 3.17 | 0.20  | 0.11 |
| 3.25 | 0.28  | 0.15 |
| 3.33 | 0.38  | 0.20 |
| 3.42 | 0.49  | 0.26 |
| 3.50 | 0.62  | 0.33 |
| 3.58 | 0.75  | 0.41 |
| 3.67 | 0.89  | 0.48 |
| 3.75 | 1.01  | 0.55 |
| 3.83 | 1.12  | 0.61 |
| 3.92 | 1.21  | 0.65 |
| 4.00 | 0.60  | 0.33 |

Precipitación total = 37.84 [mm]  
 Precipitación efectiva = 9.10 [mm]

Método: H. U. Triangular (SCS)

| Tiempo<br>[h] | Caudal<br>[m3/s] |
|---------------|------------------|
| 0.33          | 0.00             |
| 0.42          | 0.04             |
| 0.50          | 0.15             |
| 0.58          | 0.37             |
| 0.67          | 0.73             |
| 0.75          | 1.24             |
| 0.83          | 1.90             |
| 0.92          | 2.73             |
| 1.00          | 3.70             |
| 1.08          | 4.74             |
| 1.17          | 5.79             |
| 1.25          | 6.78             |
| 1.33          | 7.68             |
| 1.42          | 8.45             |



|      |       |
|------|-------|
| 1.50 | 9.09  |
| 1.58 | 9.57  |
| 1.67 | 9.89  |
| 1.75 | 10.05 |
| 1.83 | 10.04 |
| 1.92 | 9.88  |
| 2.00 | 9.56  |
| 2.08 | 9.11  |
| 2.17 | 8.55  |
| 2.25 | 7.94  |
| 2.33 | 7.28  |
| 2.42 | 6.61  |
| 2.50 | 5.94  |
| 2.58 | 5.28  |
| 2.67 | 4.65  |
| 2.75 | 4.05  |
| 2.83 | 3.49  |
| 2.92 | 2.97  |
| 3.00 | 2.50  |
| 3.08 | 2.08  |
| 3.17 | 1.71  |
| 3.25 | 1.39  |
| 3.33 | 1.12  |
| 3.42 | 0.90  |
| 3.50 | 0.73  |
| 3.58 | 0.60  |
| 3.67 | 0.51  |
| 3.75 | 0.46  |
| 3.83 | 0.44  |
| 3.92 | 0.45  |
| 4.00 | 0.48  |
| 4.08 | 0.51  |
| 4.16 | 0.55  |
| 4.25 | 0.57  |
| 4.33 | 0.59  |
| 4.41 | 0.58  |
| 4.50 | 0.56  |
| 4.58 | 0.52  |
| 4.66 | 0.46  |
| 4.75 | 0.41  |
| 4.83 | 0.35  |
| 4.91 | 0.29  |
| 5.00 | 0.24  |
| 5.08 | 0.19  |
| 5.16 | 0.14  |
| 5.25 | 0.10  |
| 5.33 | 0.07  |
| 5.41 | 0.04  |
| 5.50 | 0.02  |
| 5.58 | 0.00  |
| 5.66 | 0.00  |

Caudal pico = 10.05 [m3/s]  
 Tiempo pico = 1.75 [h]  
 Volumen = 5.9312E+04 [m3]

## RESULTADOS DE HIDROGRAMAS OBTENIDOS EN MODELO HIDRO 1

| ESCENARIO A1               |                  |                 | ESCENARIO A2               |                  |                 | ESCENARIO A3               |                  |                 | ESCENARIO A4  |                  |                 |
|----------------------------|------------------|-----------------|----------------------------|------------------|-----------------|----------------------------|------------------|-----------------|---------------|------------------|-----------------|
| TIEMPO<br>(h)              | CAUDAL<br>(m3/s) | VOLUMEN<br>(m3) | TIEMPO<br>(h)              | CAUDAL<br>(m3/s) | VOLUMEN<br>(m3) | TIEMPO<br>(h)              | CAUDAL<br>(m3/s) | VOLUMEN<br>(m3) | TIEMPO<br>(h) | CAUDAL<br>(m3/s) | VOLUMEN<br>(m3) |
| 0.08333                    | 0.0              | 0               | 0.08333                    | 0                | 0               | 0.08333                    | 0                | 0               | 0.08333       | 0                | 0               |
| 0.17                       | 0.0              | 0               | 0.1666                     | 0.00             | 0               | 0.1666                     | 0                | 0               | 0.1666        | 0                | 0               |
| 0.25                       | 0.2              | 22              | 0.2499                     | 0.01             | 1               | 0.2499                     | 0.01             | 0               | 0.2499        | 0                | 0               |
| 0.33                       | 0.7              | 120             | 0.33                       | 0.11             | 17              | 0.33                       | 0.08             | 13              | 0.33          | 0                | 0               |
| 0.42                       | 1.7              | 386             | 0.42                       | 0.42             | 86              | 0.42                       | 0.29             | 60              | 0.42          | 0.04             | 6               |
| 0.5                        | 3.2              | 707             | 0.50                       | 1.01             | 206             | 0.5                        | 0.69             | 141             | 0.5           | 0.15             | 27              |
| 0.58                       | 5.2              | 1210            | 0.58                       | 1.93             | 423             | 0.58                       | 1.3              | 287             | 0.58          | 0.37             | 75              |
| 0.67                       | 7.5              | 2062            | 0.67                       | 3.18             | 828             | 0.67                       | 2.14             | 557             | 0.67          | 0.73             | 178             |
| 0.75                       | 10.2             | 2549            | 0.75                       | 4.75             | 1142            | 0.75                       | 3.2              | 769             | 0.75          | 1.24             | 284             |
| 0.83                       | 12.9             | 3325            | 0.83                       | 6.60             | 1634            | 0.83                       | 4.48             | 1106            | 0.83          | 1.9              | 452             |
| 0.92                       | 15.4             | 4591            | 0.92                       | 8.65             | 2471            | 0.92                       | 5.94             | 1688            | 0.92          | 2.73             | 750             |
| 1.00                       | 17.3             | 4706            | 1.00                       | 10.69            | 2785            | 1                          | 7.43             | 1925            | 1             | 3.7              | 926             |
| 1.08                       | 18.4             | 5129            | 1.08                       | 12.49            | 3338            | 1.08                       | 8.84             | 2342.9          | 1.08          | 4.74             | 1215            |
| 1.17                       | 18.7             | 5996            | 1.17                       | 13.91            | 4277            | 1.17                       | 10.07            | 3063            | 1.17          | 5.79             | 1706            |
| 1.25                       | 18.3             | 5325            | 1.25                       | 14.69            | 4147            | 1.25                       | 11.09            | 3047            | 1.25          | 6.78             | 1810            |
| 1.33                       | 17.5             | 5160            | 1.33                       | 15.38            | 4359            | 1.33                       | 11.85            | 3303            | 1.33          | 7.68             | 2062            |
| 1.42                       | 16.4             | 5495            | 1.42                       | 15.40            | 4986            | 1.42                       | 12.36            | 3922            | 1.42          | 8.45             | 2613            |
| 1.5                        | 15.1             | 4540            | 1.50                       | 15.01            | 4379            | 1.5                        | 12.59            | 3593            | 1.5           | 9.09             | 2526            |
| 1.58                       | 13.7             | 4149            | 1.58                       | 14.27            | 4216            | 1.58                       | 12.57            | 3623            | 1.58          | 9.57             | 2687            |
| 1.67                       | 12.2             | 4194            | 1.67                       | 13.26            | 4460            | 1.67                       | 12.31            | 4031            | 1.67          | 9.89             | 3153            |
| 1.75                       | 10.7             | 3293            | 1.75                       | 12.05            | 3645            | 1.75                       | 11.83            | 3476            | 1.75          | 10.05            | 2871            |
| 1.83                       | 9.1              | 2847            | 1.83                       | 10.74            | 3282            | 1.83                       | 11.14            | 3308            | 1.83          | 10.04            | 2893            |
| 1.92                       | 7.5              | 2686            | 1.92                       | 9.38             | 3259            | 1.92                       | 10.27            | 3468            | 1.92          | 9.88             | 3227            |
| 2                          | 5.9              | 1928            | 2.00                       | 8.05             | 2510            | 2                          | 9.27             | 2814            | 2             | 9.56             | 2799            |
| 2.08                       | 4.5              | 1495            | 2.08                       | 6.82             | 2141            | 2.08                       | 8.19             | 2514            | 2.08          | 9.11             | 2688            |
| 2.17                       | 3.3              | 1259            | 2.17                       | 5.72             | 2031            | 2.17                       | 7.12             | 2480            | 2.17          | 8.55             | 2861            |
| 2.25                       | 2.4              | 824             | 2.25                       | 4.80             | 1515            | 2.25                       | 6.08             | 1901            | 2.25          | 7.94             | 2375            |
| 2.33                       | 1.8              | 608             | 2.33                       | 4.04             | 1273            | 2.33                       | 5.11             | 1611            | 2.33          | 7.28             | 2192            |
| 2.42                       | 1.4              | 512             | 2.42                       | 3.42             | 1209            | 2.42                       | 4.22             | 1511            | 2.42          | 6.61             | 2250            |
| 2.5                        | 1.1              | 347             | 2.50                       | 2.91             | 912             | 2.5                        | 3.44             | 1103            | 2.5           | 5.94             | 1807            |
| 2.58                       | 0.8              | 269             | 2.58                       | 2.45             | 772             | 2.58                       | 2.76             | 893             | 2.58          | 5.28             | 1616            |
| 2.67                       | 0.6              | 235             | 2.67                       | 2.02             | 724             | 2.67                       | 2.2              | 804             | 2.67          | 4.65             | 1609            |
| 2.75                       | 0.5              | 157             | 2.75                       | 1.67             | 531             | 2.75                       | 1.75             | 569             | 2.75          | 4.05             | 1253            |
| 2.83                       | 0.3              | 111             | 2.83                       | 1.40             | 442             | 2.83                       | 1.4              | 454             | 2.83          | 3.49             | 1086            |
| 2.92                       | 0.2              | 78              | 2.92                       | 1.17             | 416             | 2.92                       | 1.15             | 413             | 2.92          | 2.97             | 1047            |
| 3                          | 0.1              | 33              | 3.00                       | 0.98             | 310             | 3                          | 0.98             | 307             | 3             | 2.5              | 788             |
| 3.08                       | 0.0              | 9               | 3.08                       | 0.81             | 258             | 3.08                       | 0.87             | 268             | 3.08          | 2.08             | 860             |
| 3.16                       | 0.0              | 0               | 3.17                       | 0.65             | 237             | 3.17                       | 0.81             | 272             | 3.17          | 1.71             | 614             |
| 3.24                       | 0.0              | 0               | 3.25                       | 0.50             | 166             | 3.25                       | 0.77             | 228             | 3.25          | 1.39             | 446             |
| 3.32                       | 0.0              | 0               | 3.33                       | 0.36             | 124             | 3.33                       | 0.74             | 217             | 3.33          | 1.12             | 361             |
| 3.4                        | 0.0              | 0               | 3.42                       | 0.23             | 96              | 3.42                       | 0.72             | 237             | 3.42          | 0.9              | 327             |
| 3.48                       | 0.0              | 0               | 3.50                       | 0.12             | 50              | 3.5                        | 0.68             | 202             | 3.5           | 0.73             | 235             |
| 3.56                       | 0.0              | 0               | 3.58                       | 0.04             | 23              | 3.58                       | 0.63             | 189             | 3.58          | 0.6              | 192             |
| 3.64                       | 0.0              | 0               | 3.67                       | 0.00             | 6               | 3.67                       | 0.56             | 193             | 3.67          | 0.51             | 180             |
| Volumen total(m3)          |                  |                 | Volumen total(m3)          |                  |                 | 3.75                       | 0.49             | 151             | 3.75          | 0.46             | 140             |
| Cudal Pico(m3/s)           |                  |                 | Cudal Pico(m3/s)           |                  |                 | 3.83                       | 0.43             | 132             | 3.83          | 0.44             | 130             |
| Precipitación total(mm)    |                  |                 | Precipitación total(mm)    |                  |                 | 3.92                       | 0.37             | 130             | 3.92          | 0.45             | 144             |
| Precipitación Efectiva(mm) |                  |                 | Precipitación Efectiva(mm) |                  |                 | 4                          | 0.31             | 98              | 4             | 0.48             | 134             |
|                            |                  |                 |                            |                  |                 | 4.08                       | 0.25             | 81              | 4.08          | 0.51             | 143             |
|                            |                  |                 |                            |                  |                 | 4.16                       | 0.19             | 63              | 4.16          | 0.55             | 153             |
|                            |                  |                 |                            |                  |                 | 4.25                       | 0.14             | 53              | 4.25          | 0.57             | 181             |
|                            |                  |                 |                            |                  |                 | 4.33                       | 0.1              | 35              | 4.33          | 0.59             | 167             |
|                            |                  |                 |                            |                  |                 | 4.41                       | 0.06             | 23              | 4.41          | 0.58             | 168             |
|                            |                  |                 |                            |                  |                 | 4.5                        | 0.03             | 15              | 4.5           | 0.56             | 185             |
|                            |                  |                 |                            |                  |                 | 4.58                       | 0.01             | 6               | 4.58          | 0.52             | 156             |
|                            |                  |                 |                            |                  |                 | 4.66                       | 0                | 1               | 4.66          | 0.46             | 141             |
|                            |                  |                 |                            |                  |                 | Volumen total(m3)          |                  |                 | 4.75          | 0.41             | 141             |
|                            |                  |                 |                            |                  |                 | Cudal Pico(m3/s)           |                  |                 | 4.83          | 0.35             | 109             |
|                            |                  |                 |                            |                  |                 | Precipitación total(mm)    |                  |                 | 4.91          | 0.29             | 92              |
|                            |                  |                 |                            |                  |                 | Precipitación Efectiva(mm) |                  |                 | 5             | 0.24             | 86              |
|                            |                  |                 |                            |                  |                 |                            |                  |                 | 5.08          | 0.19             | 62              |
|                            |                  |                 |                            |                  |                 |                            |                  |                 | 5.16          | 0.14             | 48              |
|                            |                  |                 |                            |                  |                 |                            |                  |                 | 5.25          | 0.1              | 39              |
|                            |                  |                 |                            |                  |                 |                            |                  |                 | 5.33          | 0.07             | 24              |
|                            |                  |                 |                            |                  |                 |                            |                  |                 | 5.41          | 0.04             | 16              |
|                            |                  |                 |                            |                  |                 |                            |                  |                 | 5.5           | 0.02             | 10              |
|                            |                  |                 |                            |                  |                 |                            |                  |                 | 5.56          | 0                | 3               |
|                            |                  |                 |                            |                  |                 |                            |                  |                 | 5.66          | 0                | 0               |
|                            |                  |                 |                            |                  |                 | Volumen total(m3)          |                  |                 | 59337         |                  |                 |
|                            |                  |                 |                            |                  |                 | Cudal Pico(m3/s)           |                  |                 | 10.05         |                  |                 |
|                            |                  |                 |                            |                  |                 | Precipitación total(mm)    |                  |                 | 37.84         |                  |                 |
|                            |                  |                 |                            |                  |                 | Precipitación Efectiva(mm) |                  |                 | 9.1           |                  |                 |

CUADRO N°: G1



## **ANEXO H**

### **CUADROS Y FIGURAS**

# RESULTADOS DE SIMULACION DE TORMENTAS SELECCIONADAS POR FECHA

| N° | FECHA |     | CENTRO DE TORMENTA SIN VIENTO |          |                      |                | VELOCIDAD<br>AEREA<br>K  | CONSTANTE<br>DE FORMA<br>n | COEFICIENTE<br>DE PATRON<br>TEMPORAL<br>K <sub>2</sub> | TIEMPO DE<br>DESFASE<br>td | VIENTOS ALTOS     |                   |       | HORA<br>DE<br>INICIO | VELOCIDAD<br>DE<br>EXPANSION<br>v1 | VELOCIDAD DE<br>CONTRACCION<br>v2 | NUMERO<br>DE<br>AJUSTE |
|----|-------|-----|-------------------------------|----------|----------------------|----------------|--------------------------|----------------------------|--------------------------------------------------------|----------------------------|-------------------|-------------------|-------|----------------------|------------------------------------|-----------------------------------|------------------------|
|    | año   | mes | día                           | LONGITUD | PRECIPITACION<br>PME | DURACION<br>DT | INTENSIDAD DE<br>LLUVA I |                            |                                                        |                            | VELOCIDAD<br>EN Y | VELOCIDAD<br>EN X | Total |                      |                                    |                                   |                        |
| 1  | 1989  | 9   | 22                            | 99761500 | 778000               | 28.00          | 4.70                     | 3.70                       | 3.40                                                   | 0.19                       | -2.60             | -0.98             | 2.78  | 14.00                | 5.90                               | -10.23                            | 25.57                  |
| 2  | 1990  | 4   | 9                             | 99770000 | 773400               | 33.00          | 5.90                     | 3.70                       | 2.40                                                   | 0.50                       | 1.40              | 1.80              | 2.28  | 26.50                | -10.44                             | -2.73                             | 41.77                  |
| 3  | 1990  | 11  | 17                            | 99799000 | 778100               | 62.00          | 1.90                     | 6.20                       | 4.80                                                   | 0.20                       | 3.29              | 0.37              | 3.31  | 16.50                | 11.78                              | -13.09                            | 27.75                  |
| 4  | 1990  | 12  | 23                            | 99778000 | 778250               | 38.00          | 3.83                     | 3.44                       | 3.60                                                   | 0.16                       | -1.50             | -0.10             | 1.50  | 15.40                | -21.25                             | -2.90                             | 61.17                  |
| 5  | 1990  | 5   | 5                             | 99763000 | 778310               | 25.60          | 3.00                     | 4.35                       | 3.00                                                   | 0.30                       | 0.28              | 2.34              | 2.36  | 13.50                | 3.44                               | 16.52                             | 37.24                  |
| 6  | 1994  | 2   | 16                            | 99736000 | 778100               | 55.00          | 22.60                    | 0.85                       | 2.11                                                   | 0.30                       | 0.78              | 0.32              | 0.84  | 14.90                | 20.65                              | -0.88                             | 33.62                  |
| 7  | 1993  | 3   | 14                            | 99764700 | 778000               | 48.00          | 4.20                     | 3.50                       | 2.80                                                   | 0.27                       | 0.00              | 2.00              | 2.00  | 15.00                | 38.68                              | -3.85                             | 9.33                   |
| 8  | 1992  | 10  | 401                           | 99740000 | 777800               | 52.00          | 9.80                     | 3.82                       | 3.14                                                   | 0.34                       | 2.72              | 1.00              | 2.90  | 14.46                | 9.68                               | -6.31                             | 30.78                  |
| 9  | 1992  | 12  | 7                             | 99774100 | 779000               | 49.50          | 3.25                     | 5.37                       | 3.40                                                   | 0.43                       | 3.40              | 2.14              | 4.02  | 13.90                | 9.49                               | -12.38                            | 21.50                  |
| 10 | 1991  | 8   | 23                            | 99758000 | 777500               | 44.00          | 2.33                     | 4.30                       | 3.60                                                   | 0.61                       | -0.50             | 0.37              | 3.50  | 15.50                | 3.77                               | 30.36                             | 46.78                  |
| 11 | 1991  | 3   | 21                            | 99773000 | 778000               | 31.00          | 18.50                    | 1.44                       | 1.90                                                   | 0.50                       | 0.40              | -0.40             | 0.37  | 10.00                | 12.11                              | -1.63                             | 34.09                  |
| 12 | 1990  | 11  | 20                            | 99749000 | 779000               | 47.00          | 2.35                     | 6.30                       | 3.90                                                   | 0.46                       | 1.90              | -1.20             | 2.26  | 14.66                | -148.05                            | -6.04                             | 81.45                  |
| 13 | 1990  | 10  | 20                            | 99765000 | 778500               | 36.00          | 3.60                     | 3.72                       | 3.60                                                   | 0.30                       | -2.92             | 0.80              | 3.03  | 14.74                | 8.93                               | -6.38                             | 49.58                  |
| 14 | 1990  | 12  | 26                            | 99770000 | 779150               | 55.00          | 2.72                     | 8.00                       | 3.60                                                   | 0.40                       | -6.00             | 2.00              | 6.32  | 13.44                | 8.68                               | -80.59                            | 40.79                  |
| 15 | 1994  | 2   | 10                            | 99777000 | 777600               | 52.00          | 1.60                     | 7.00                       | 3.40                                                   | 1.40                       | -5.50             | 1.00              | 5.59  | 14.45                | 14.00                              | -14.00                            | 34.50                  |

CUADRO N°: H1

# CENTROS DE TORMENTAS DEFINITIVOS CONSIDERANDO EL EFECTO DE VIENTOS DE ALTURA

| N° | FECHA |     |     | CENTRO DE TORMENTA CON VIENTO |          |                      |                 | COEFICIENTE ENTRE VALORES |      |      |      | RECORRIDO DE CENTRO DE TORMENTA |
|----|-------|-----|-----|-------------------------------|----------|----------------------|-----------------|---------------------------|------|------|------|---------------------------------|
|    | año   | mes | día | LATITUD                       | LONGITUD | PRECIPITACION<br>PME | DURACION<br>DTc | INTENSIDAD DE LLUVA Ic    | wDtc | KDtc | WDTc |                                 |
|    |       |     |     |                               |          |                      |                 |                           |      |      |      |                                 |
| 1  | 1989  | 9   | 22  | 9976320                       | 778142   | 31.79                | 3.58            | 8.9                       | 0.95 | 1.03 | 0.78 | 17.4                            |
| 2  | 1990  | 4   | 9   | 9976220                       | 778142   | 29.62                | 3.77            | 7.9                       | 0.64 | 0.98 | 0.61 | 20.4                            |
| 3  | 1990  | 11  | 17  | 9976520                       | 778142   | 53.57                | 1.44            | 37.1                      | 3.33 | 4.30 | 2.29 | 11.8                            |
| 4  | 1990  | 12  | 23  | 9976420                       | 778142   | 35.83                | 2.67            | 13.4                      | 1.35 | 1.29 | 0.56 | 13.2                            |
| 5  | 1990  | 5   | 5   | 9976320                       | 778242   | 41.84                | 3.50            | 12.0                      | 0.86 | 1.24 | 0.67 | 13.1                            |
| 6  | 1994  | 2   | 16  | 9971320                       | 779442   | 43.13                | 13.00           | 3.3                       | 0.16 | 0.07 | 0.06 | 19.2                            |
| 7  | 1993  | 3   | 14  | 9976520                       | 779042   | 39.08                | 2.92            | 13.4                      | 0.96 | 1.20 | 0.69 | 14.7                            |
| 8  | 1992  | 10  | 401 | 9974590                       | 777920   | 42.65                | 2.63            | 49.2                      | 1.19 | 1.45 | 1.10 | 14.5                            |
| 9  | 1992  | 12  | 7   | 9977895                       | 779417   | 41.14                | 2.38            | 17.3                      | 1.43 | 2.25 | 1.69 | 17.5                            |
| 10 | 1991  | 8   | 23  | 9975620                       | 777342   | 45.08                | 2.60            | 17.3                      | 1.46 | 1.65 | 1.36 | 10.0                            |
| 11 | 1991  | 3   | 21  | 9975400                       | 776942   | 26.78                | 14.83           | 1.6                       | 0.13 | 0.10 | 0.04 | 26.6                            |
| 12 | 1990  | 11  | 28  | 9975720                       | 778642   | 39.32                | 1.82            | 21.6                      | 1.98 | 3.47 | 1.24 | 14.8                            |
| 13 | 1990  | 10  | 20  | 9976120                       | 778342   | 30.30                | 2.43            | 12.5                      | 1.48 | 1.53 | 1.24 | 13.4                            |
| 14 | 1990  | 12  | 26  | 9977120                       | 779142   | 62.00                | 2.50            | 24.8                      | 1.44 | 3.20 | 2.53 | 21.8                            |
| 15 | 1994  | 2   | 10  | 9976420                       | 777842   | 28.80                | 1.13            | 25.4                      | 3.00 | 6.18 | 4.93 | 11.2                            |

CUADRO N°: H2



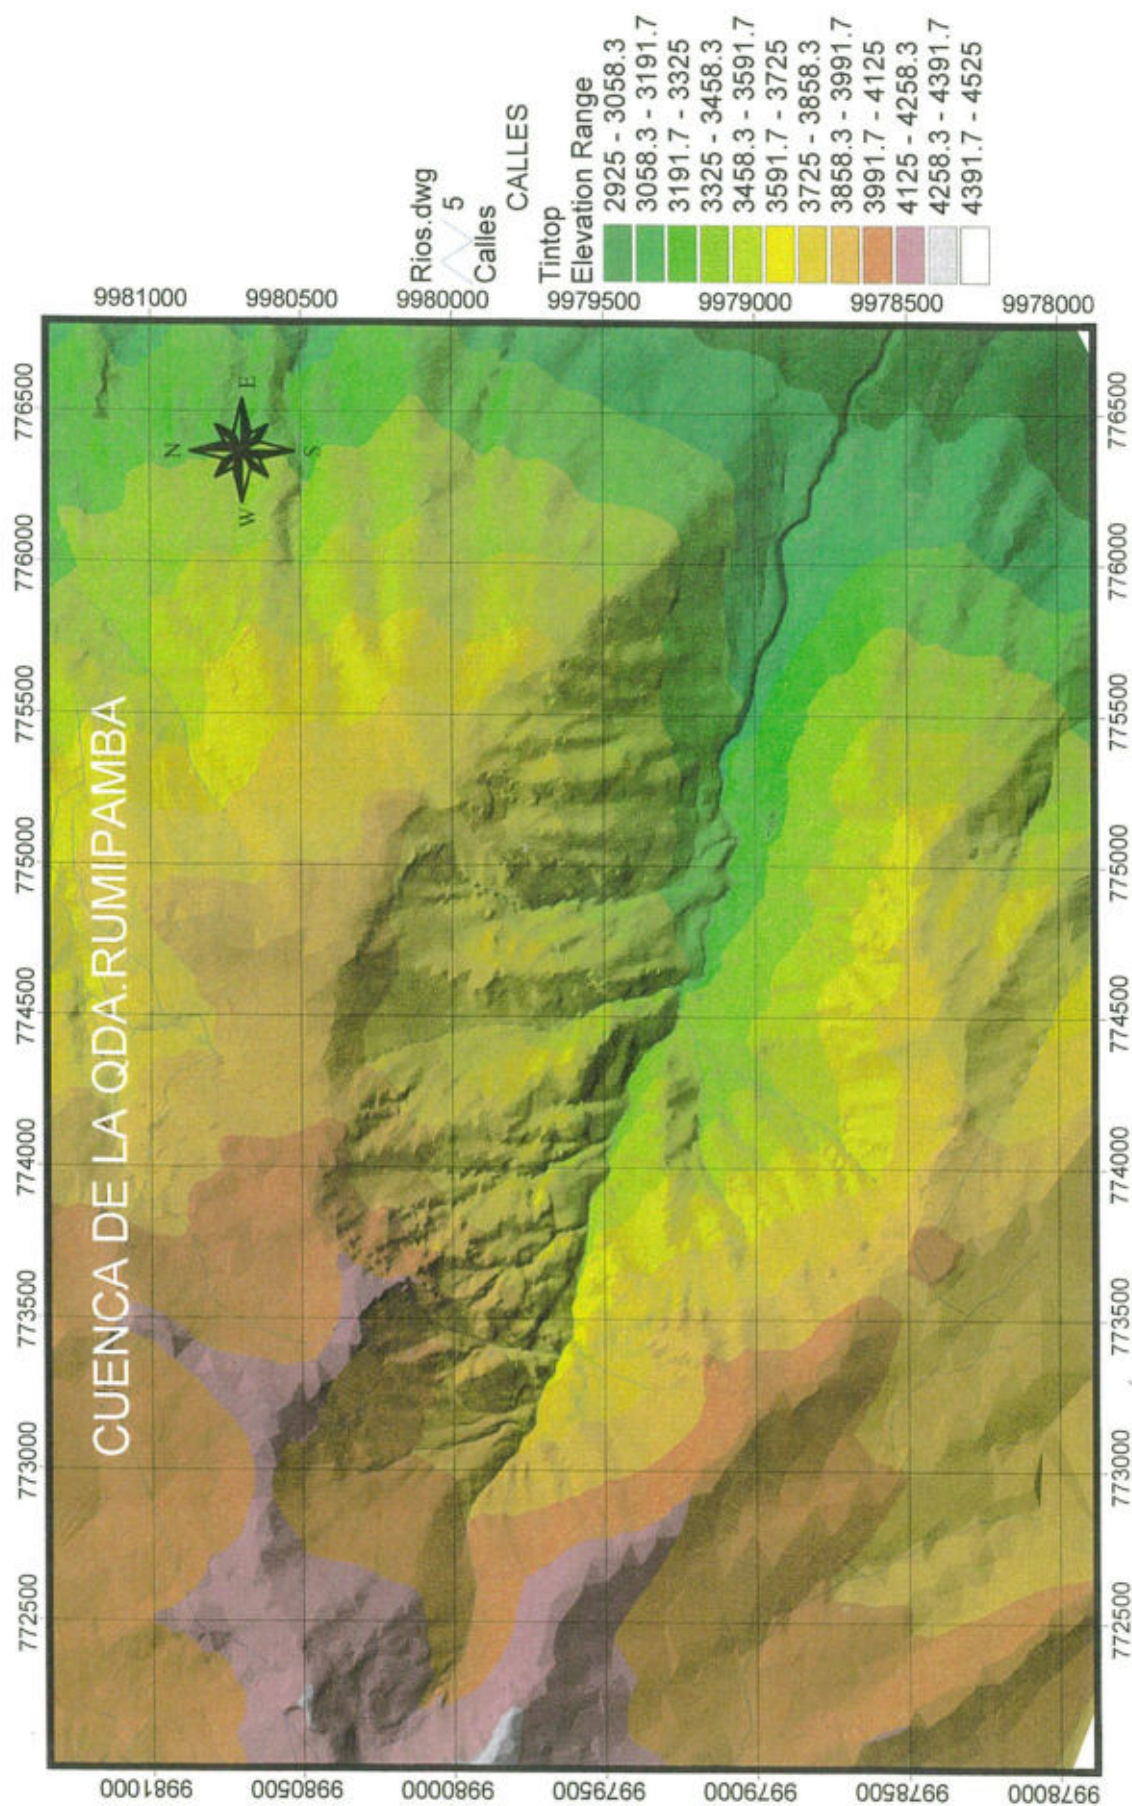

Figura N°:H1



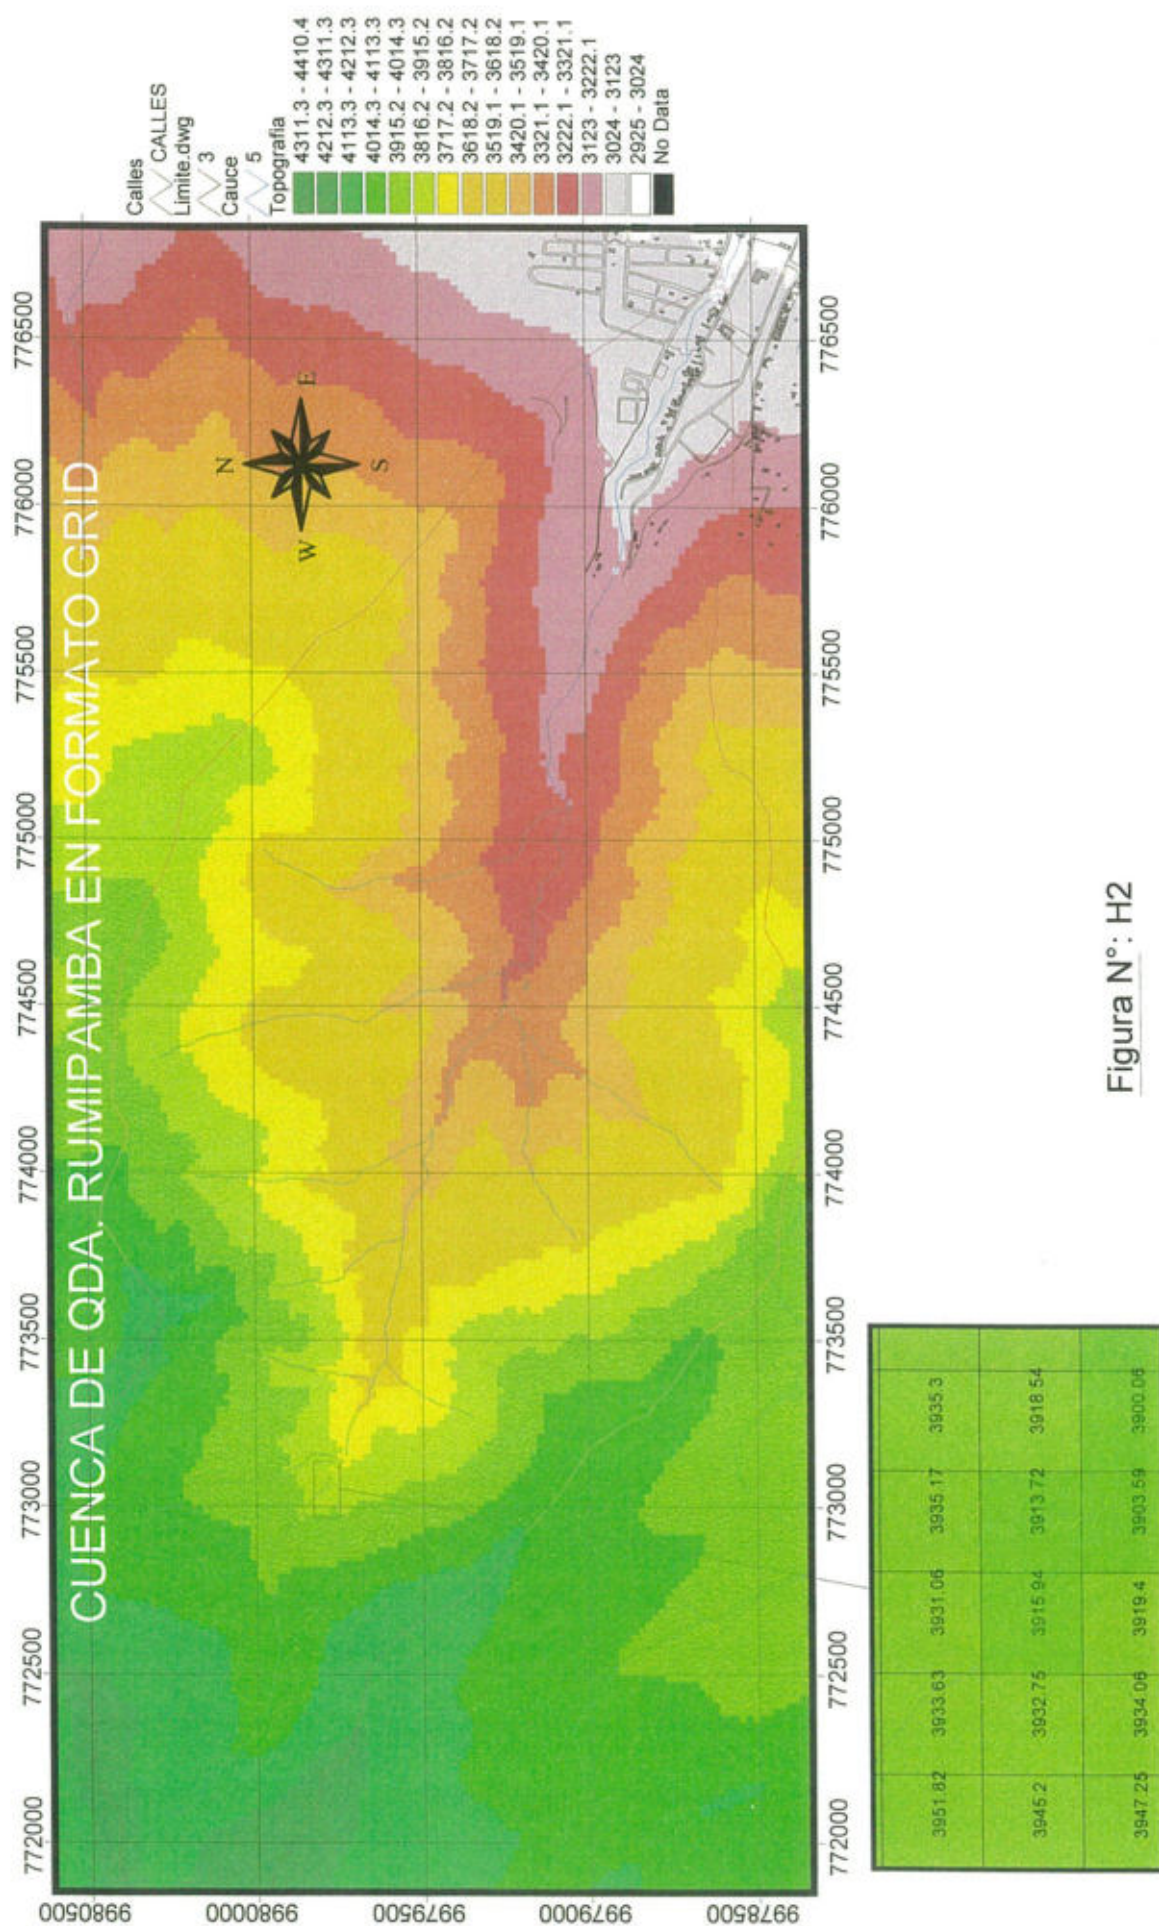

Figura N°: H2



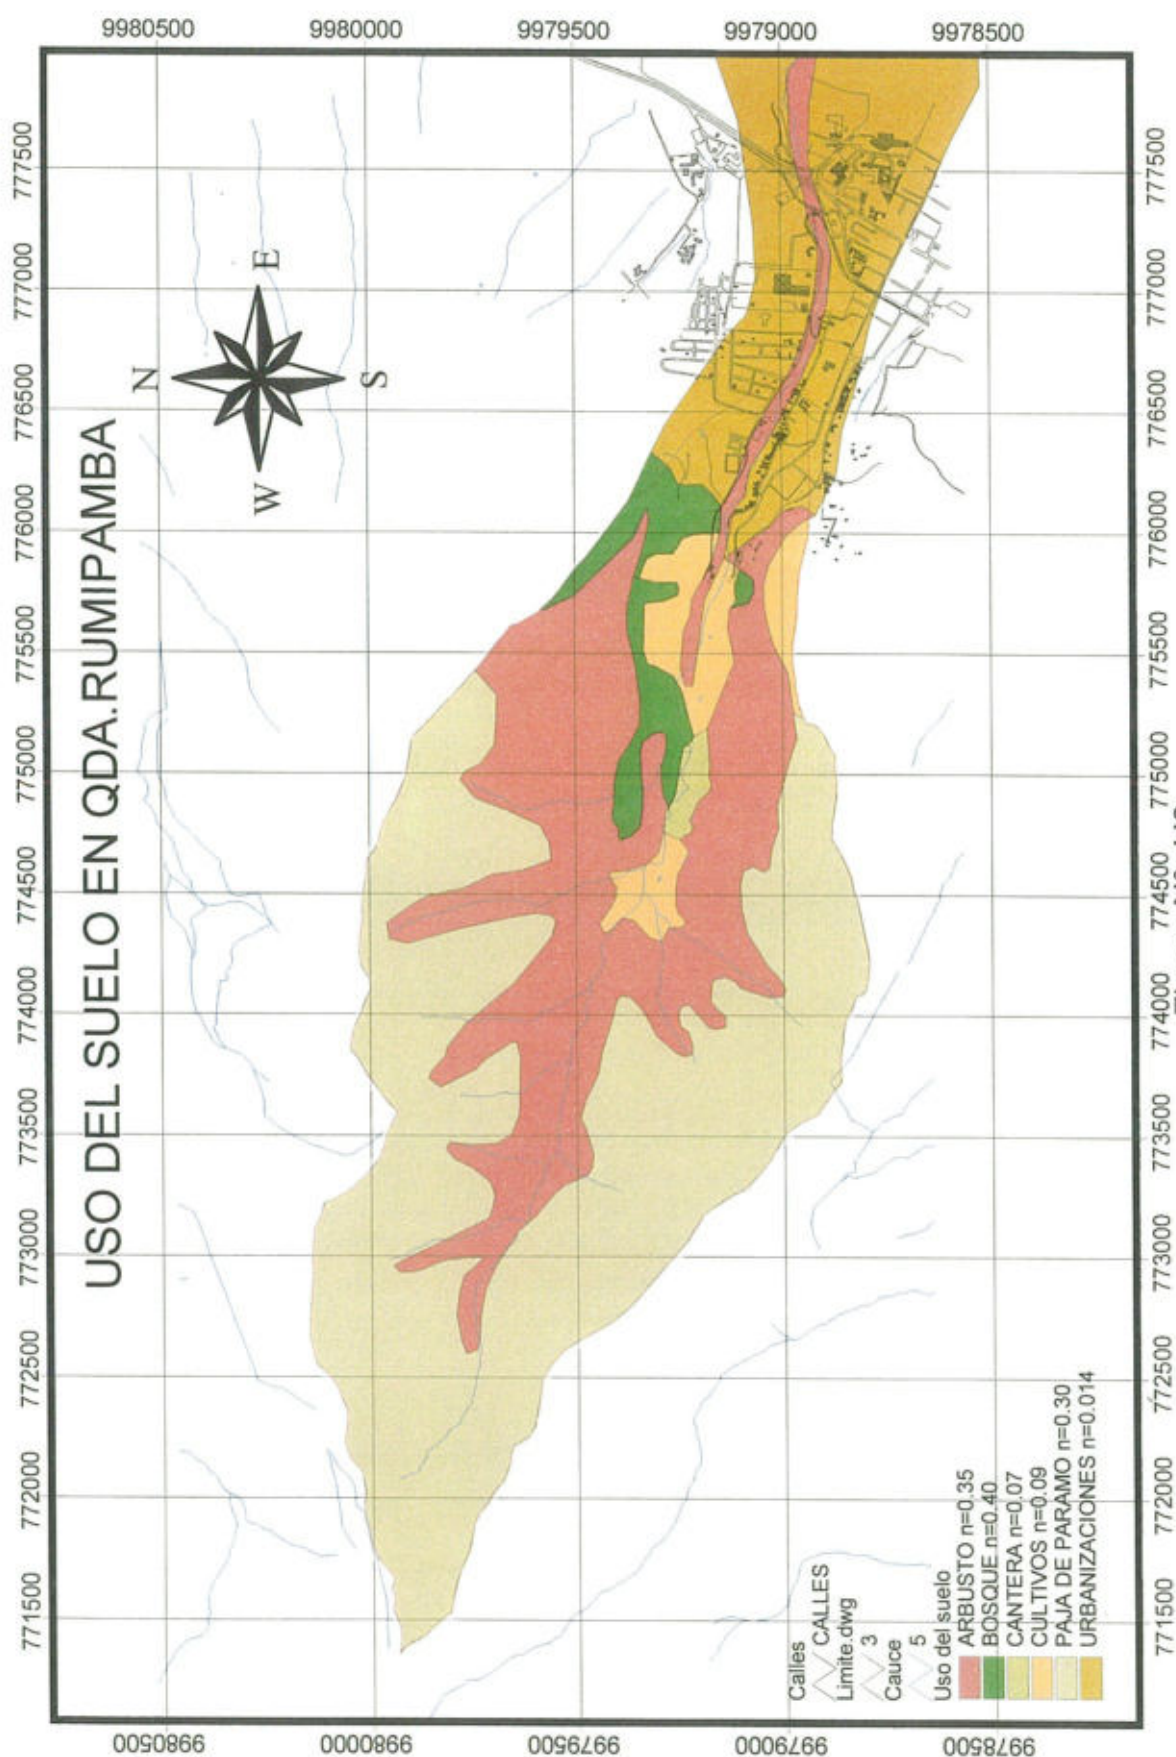

Figura N°: H3

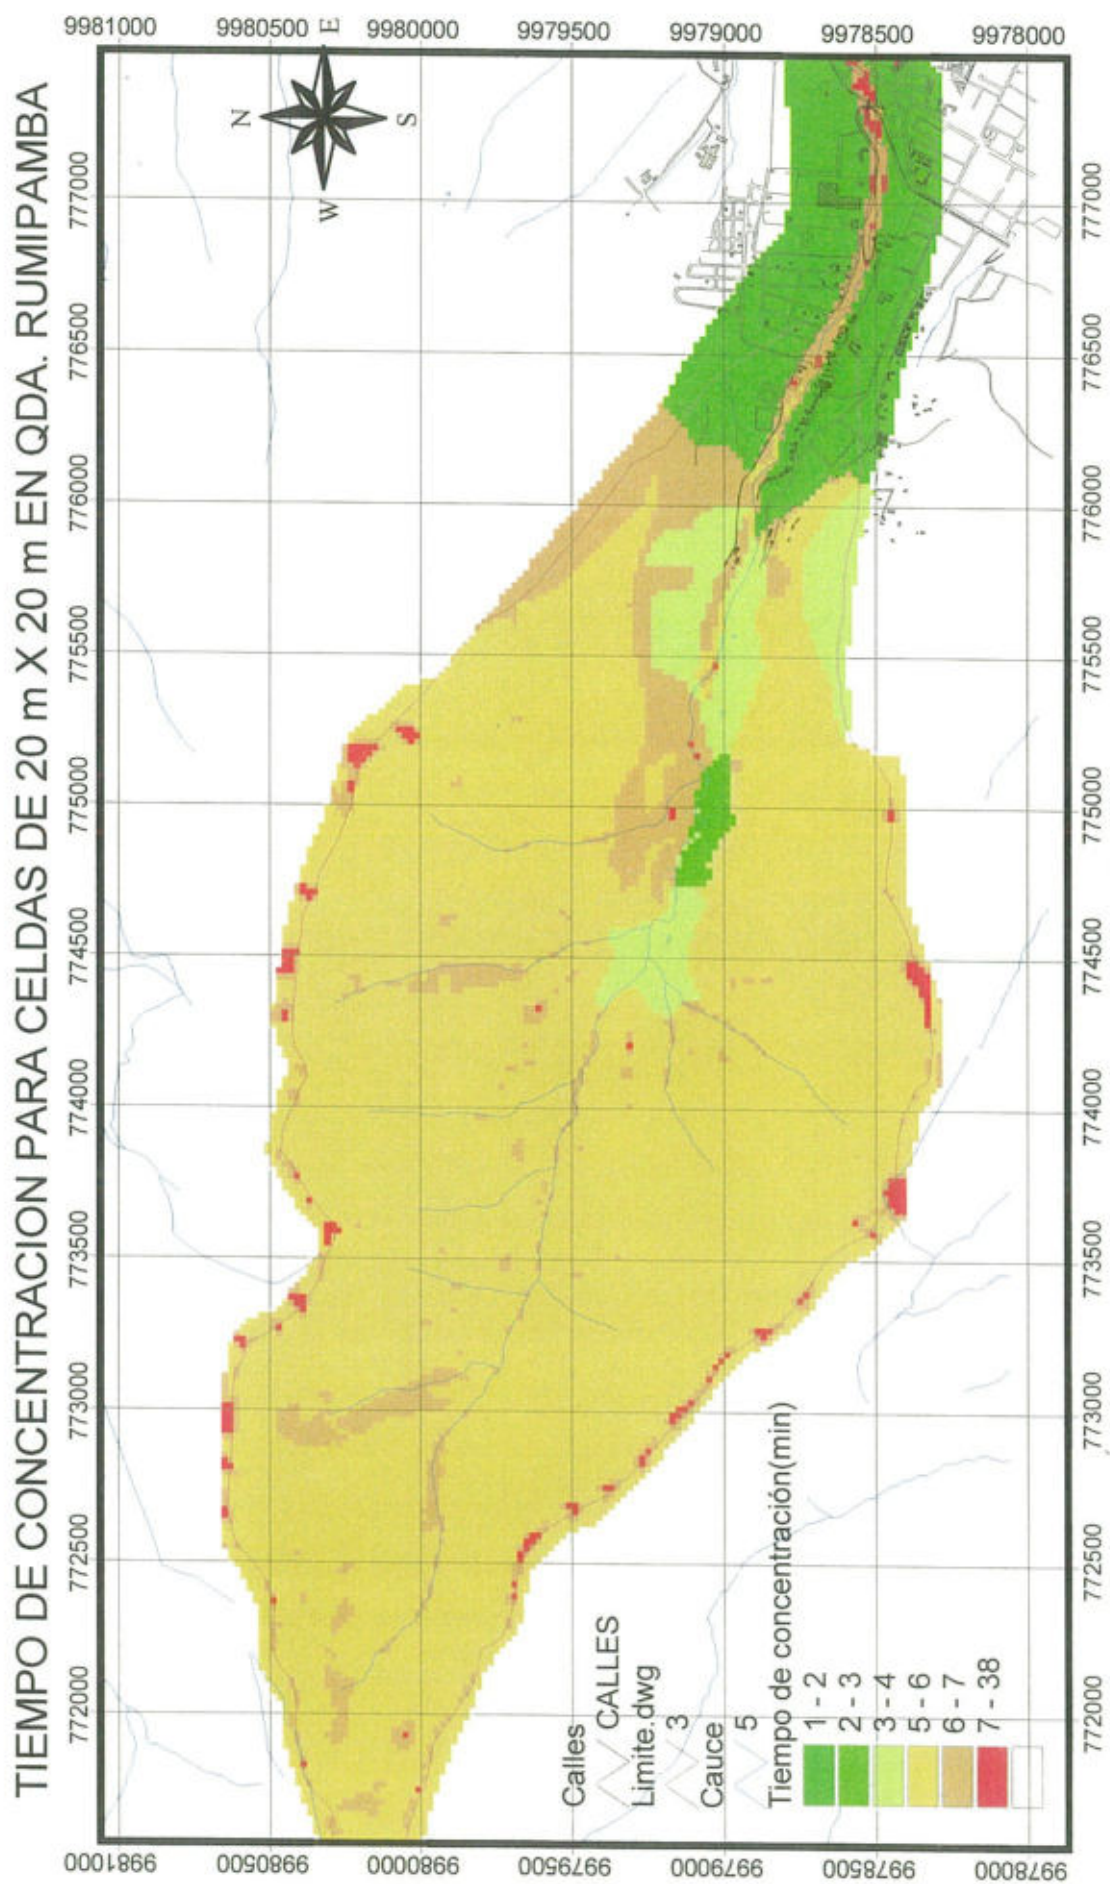

FIGURA N°: H4



## **ANEXO I**

**CODIGO FUENTE DE LOS PROGRAMAS UTILIZADOS**  
**PROGRAMA 1: TORMENTA**  
**PROGRAMA 2: MISION**

**PROGRAMA: TORMENTA**  
**VERSION: 1.0**  
**AUTOR: Ing. Franklin Beltrán**  
**FECHA: Noviembre 2003**  
**LENGUAJE: VisualBasic**

```
Dim xo As Single
Dim yo As Single
Public escy As Integer
Public escr As Integer
Public escx As Integer
Dim r1 As Single
Public xt1 As Single
Public xt2 As Single
Public xt As Single
Public PRE As Single
Public td As Single
Public dt As Single
Public ti As Single
Public tf As Single
Public t As Single
Public v1 As Single
Public v2 As Single
Public k As Single
Public k1 As Single
Public k2 As Single
Public n As Single
Public rmax As Single
Public clave As Single
Private t1(25, 7) As Single
Private Pr(25, 7) As Single
Private P(0 To 20000, 0 To 7) As Single
Private NP(7)
Private FIN(0 To 7) As Single
Private INI(0 To 7) As Single
Public velvienX As Single
Public velvieny As Single
Public claveajuste As Integer
Public DELTAT As Single
Public inicx As Single
Public finax As Single
Public inicy As Single
Public finay As Single
Public clave3 As Integer
Public clave4 As Integer
Public PIXX As Integer
Public nhora As Integer
Public inihora As Single
Public nest As Integer
Public mAJUSTE As Single
Public total As Single
Private Sub AJUSTE_Click()
clave = 1
MINIMO = 1000000000
tdmin = Val(tdmin1.Text)
tdmax = Val(tdmax1.Text)
velvienxmin = Val(velvienxmin1.Text)
velvienxmax = Val(velvienxmax1.Text)
velvienymin = Val(velvienymin1.Text)
velvienymax = Val(velvienymax1.Text)
dtd = Val(dtd1.Text)
```

```

dvx = Val(dvx1.Text)
dvy = Val(dvy1.Text)
hora = Val(hora1.Text)
For td = tadmin To tdmx Step dtd
TXTDES.Text = td
For velvienX = velvienxmin To velvienxmax Step dvx
  VELX.Text = velvienX
  For velvieny = velvienymin To velvienymax Step dvy
    VELY.Text = velvieny
    For xx = inicx To finax Step (finax - inicx) / 5
      For yy = inicy To finay Step (finax - inicx) / 5
        xxx = xx * 40000 / 10850 + 760000
        yyy = 9955000 + (10850 - yy) * 40000 / 10850
        COORX1.Text = xxx
        COORY1.Text = yyy
        Image1.Refresh
        Call Simule_Click
        diferencia1 = 0: diferencia2 = 0: diferencia3 = 0
        If (total < MINIMO) And (total > 0) Then
          MINIMO = total
          BINGOX = xxx
          BINGOY = yyy
          bingovelx = velvienX
          bingovely = velvieny
          bingotd = td
        End If
      Next yy
    Next xx
  Next velvieny
Next velvienX
Next td
COORX1.Text = BINGOX
COORY1.Text = BINGOY
VELX.Text = bingovelx
VELY.Text = bingovely
TXTDES.Text = bingotd
residuo.Text = Format(MINIMO, "###.###")
Beep
End Sub
Private Sub Bañada_Click()
If BAÑADA.Value = False Then
clave = 0
Else
clave = 1
End If
End Sub
Private Sub Calcule_Click()
Refresh
PRE = Val(TXTPRE.Text)
dt = Val(TXTDUR.Text)
n = Val(TXTCOE.Text)
td = Val(TXTDES.Text)
k = Val(TXTVEL.Text)
k2 = Val(TXTTEMP.Text)
k1 = PRE / (dt ^ n)
rmax = k * dt
velvienX = Val(VELX.Text)
velvieny = Val(VELY.Text)
'COORXO = Val(COORX1.Text)
'COORYO = Val(COORY1.Text)
nest = Check1 + Check2 + Check3 + Check4 + Check5 + Check6
If td = 0 Then

```



```

v1 = 100000000000#
Else
v1 = k * dt / td
End If
If dt = td Then
v2 = 100000000000#
Else
v2 = -k * dt / (dt - td)
End If
TXTV1.Text = Format(v1, "###.##")
TXTV2.Text = Format(v2, "###.##")
'1.- GRAFICO DE REPRESENTACION MATEMATICA DE TORMENTA
pix = 500 ' PUNTO DE INICIO EN X PARA DIBUJO DE eje de coordenaadas
piy = 9100 ' PUNTO DE INICIO EN Y PARA DIBUJO DE eje de coordeandas
ly = 3600 ' LONGITUD DE EJE Y debe ser multiplo de 400
'-----
lx = 5600 ' LONGITUD DE EJE X
dx = 400 ' INTERVALO DE X
dy = 400 ' INTERVALO DE Y
r = 50
escx = 400 ' ESCALA EN X CADA UNIDAD = dx/escx
escy = 200 ' ESCALA EN y CADA UNIDAD = dy/escx
escr = Image1.Width * 1000 / 40000
'ejes
xo = pix + 2 * dx ' inicio de punto de linea horizontal, punto izquierdo
yo = piy + ly - 2 * dy ' inicio de punto de linea vertical, punto bajo
form2.Line (xo, piy)-(xo, piy + ly - dy), vbWhite
form2.Line (xo - dx + 250, piy + ly - 2 * dy)-(pix + lx - dx + 500, piy + ly - 2 * dy), vbWhite
'horizontal
'flechas horizontales
form2.Line (pix + lx, piy + ly - 2 * dy - 50)-(pix + lx + 100, piy + ly - 2 * dy), vbWhite
form2.Line (pix + lx + 100, piy + ly - 2 * dy)-(pix + lx, piy + ly - 2 * dy + 50), vbWhite
'flechas verticales
form2.Line (xo - 50, piy)-(xo, piy - 100), vbWhite
form2.Line (xo, piy - 100)-(xo + 50, piy), vbWhite
Me.CurrentX = pix - 475
Me.CurrentY = piy
Print "Distancia(Km)"
Me.CurrentX = pix + lx - 700
Me.CurrentY = piy + ly - 300
Print "Tiempo(h)"
Me.CurrentX = 2800
Me.CurrentY = piy - 840
Me.FontSize = 13
Print "MODELO"
Me.FontSize = 9
'unidades
For X = pix To pix + lx - 800 Step dx
form2.Line (X + 800, piy + ly - 2 * dy - r)-(X + 800, piy + ly - 2 * dy + r), vbWhite
Me.CurrentX = (X - 80 + 730)
If (X / escx) <> 0 Then
Print X / escx - 1.25 ' imprime los valores de los ejes en x
End If
Next
For Y = (piy) To (piy + ly - 2 * dy) Step dy
form2.Line (pix + 2 * dx - r, Y)-(pix + 2 * dx + r, Y), vbWhite
Me.CurrentX = xo - 300
Print (28 + (piy - Y) / escy * 2) ' imprime los valores de los ejes en y
Next Y
'lineas de velocidad
form2.Line (xo, yo)-(xo + td * escx, (yo - rmax * escy / 2)), vbWhite
Me.CurrentX = CurrentX - 1500

```

```

Me.CurrentY = CurrentY - 250
Print "Rmax="; Format(rmax, "####.00 Km")
form2.Line (xo + td * escx, (yo - rmax * escy / 2))-(xo + dt * escx, yo), vbWhite
'lineas de dimensiones
form2.Line (xo + td * escx, (yo - rmax * escy / 2))-(xo, (yo - rmax * escy / 2)), vbRed
form2.Line (xo + td * escx, (yo - rmax * escy / 2))-(xo + dt * escx, yo), vbRed
yl = yo + 300
ytd = yo + 700
form2.Line (xo, yl)-(xo + dt * escx, yl), vbRed 'duracion de tormenta
form2.Line (xo - 50, yl + 50)-(xo + 50, yl - 50), vbRed 'auxiliares duracion de tormenta
form2.Line (xo + dt * escx - 50, yl + 50)-(xo + dt * escx + 50, yl - 50), vbRed 'auxiliares
duracion de tormenta
xm = (xo + xo + dt * escx) / 2 - 200
Me.CurrentX = xm
Me.CurrentY = yl + 50
Print "DT="; dt
xm = (xo + xo + td * escx) / 2 - 200
Me.CurrentX = xm
Me.CurrentY = ytd - 100
Print "Td="; td
'2.- LOCALIZACION DE ESTACIONES
'ubicacion de estaciones
FillStyle = 0
'Q.OBSERVATORIO
FillColor = vbRed
Circle (11307.09375, 7069.58958333317), 75, vblack
Me.CurrentX = 10600
Me.CurrentY = 7200
Print "Q.OBSERVATORIO"
'IZOBAMBA
FillColor = vbGreen
Circle (9757.05069444472, 11603.08125), 75, vblack
Me.CurrentX = 9350
Me.CurrentY = 11800
Print "IZOBAMBA"
'INAQUITO
FillColor = vbMagenta
Circle (11851.703472222, 5979.88791666684), 75, vblack
Me.CurrentX = 11450
Me.CurrentY = 6200
Print "INAQUITO"
'tola
FillColor = vbYellow
Circle (14323.3937499998, 7235.95625), 75, vblack
Me.CurrentX = 14200
Me.CurrentY = 7400
Print "TOLA"
'chorrera
FillColor = vbBlack
Circle (10251.3887500001, 7069.58958333317), 75, vblack
Me.CurrentX = 9500
Me.CurrentY = 7200
Print "CHORRERA"
'Aeropuerto
FillColor = vbBlue
Circle (11675.7526388888, 4940.09625), 75, vblack
FillColor = vbWhite
FillStyle = 7
Me.CurrentX = 11100
Me.CurrentY = 5040
Print "AEROPUERTO"
End Sub

```

```

Private Sub limisup_Click()
    If limisup.Value = False Then
        clave3 = 0
        Beep
    Else
        clave3 = 1
        Beep
    End If
    Beep
End Sub
Private Sub limiinf_Click()
    If limiinf.Value = False Then
        Beep
        clave4 = 0
    Else
        Beep
        clave4 = 1
    End If
    Beep
End Sub
Public Sub Simule_Click()
    Dim PR1(50)
    If td <= 0 Then
        ti = td
    Else
        ti = 0
    End If
    If td < dt Then
        tf = dt
    Else
        tf = td
    End If
    'tiempoini = Timer
    horaini = Val(horaini1.Text)
    hora = Val(hora1.Text)
    COORXO = Val(COORX1.Text)
    COORYO = Val(COORY1.Text)
    xct = 6350 + (COORXO - 760000) * 10850 / 40000
    yct = (12920 - (COORYO - 9955000) * 10850 / 40000) 'los 235 por ancho de barra
    COORCx = Val(CORCX.Text)
    COORCy = Val(CORCY.Text)
    xctmax = 6350 + (COORCx - 760000) * 10850 / 40000
    yctmax = (12920 - (COORCy - 9955000) * 10850 / 40000) 'los 235 Por ancho de barra
    DELTAT = Val(DELTAT1.Text) / 60
    k3 = 1 - 10 ^ (-(1 / k2))
    '3.- GRAFICO DE PATRON DE TORMENTA SINTETICO
    poy = 4700 'eje en y de dibujo de precipitacion en corte
    DrawStyle = 0
    pix = 800
    Me.CurrentX = pix - 750
    Me.CurrentY = poy - 1700
    Print "P(mm)"
    Me.CurrentX = 2500
    Me.CurrentY = poy - 2500
    Me.FontSize = 13
    Print "TORMENTA SIMULADA"
    Me.FontSize = 9
    Me.CurrentX = 4000
    Me.CurrentY = poy - 2000
    Print "Dur(min) P(mm) Estación"
    Me.CurrentX = pix - 270: Me.CurrentY = poy - 2100: Print "50"
    Me.CurrentX = pix - 270: Me.CurrentY = poy - 1700: Print "40"

```



```

Me.CurrentX = pix - 270: Me.CurrentY = poy - 1300: Print "30"
Me.CurrentX = pix - 270: Me.CurrentY = poy - 900: Print "20"
Me.CurrentX = pix - 270: Me.CurrentY = poy - 500: Print "10"
'lineas de patron temporal de tormenta
nhora = 8
pixF = pix + nhora * escx
form2.Line (pix - 50, poy)-(pixF, poy), vbWhite ' HORIZONTAL
form2.Line (pix, poy - 2100)-(pix, poy + 100), vbWhite ' VERTICAL LARGA
'flechas verticales
form2.Line (pix, poy - 2100)-(pix - 50, poy - 2000), vbWhite
form2.Line (pix - 50, poy - 2000)-(pix + 50, poy - 2000), vbWhite
form2.Line (pix + 50, poy - 2000)-(pix, poy - 2100), vbWhite
'flechas horizontales
form2.Line (pixF + 50, poy)-(pixF - 50, poy - 50), vbWhite
form2.Line (pixF - 50, poy - 50)-(pixF - 50, poy + 50), vbWhite
form2.Line (pixF - 50, poy + 50)-(pixF + 50, poy), vbWhite
'lineas horizontales de division
escvpre = 40
pixi = pix - 50: pixd = pix + 50
For l = 1 To 4
form2.Line (pixi, poy - l * escvpre * 10)-(pixd, poy - l * escvpre * 10), vbWhite
Next l
'lineas verticales de division
For l = 1 To nhora - 1
form2.Line (pix + l * escx, poy)-(pix + l * escx, poy + 100), vbWhite
Next l
For ff = horaini To horaini + nhora Step 1
Me.CurrentY = poy + 100
Me.CurrentX = 625 + escx * (ff - horaini)
Print ff ' imprime los valores de los ejes en x
Next ff
Me.CurrentY = poy + 50
Me.CurrentX = 4500
Print "Tiempo(h)"
'-----
ii = 0
Dim tx(7) As Single
Dim ty(7) As Single
P(0, 1) = 0
P(0, 2) = 0
P(0, 3) = 0
P(0, 4) = 0
P(0, 5) = 0
P(0, 6) = 0
P(0, 7) = 0
cas1 = 0: cas2 = 0: cas3 = 0: cas4 = 0: cas5 = 0: cas6 = 0: cas7 = 0
For t = ti To tf Step DELTAT
ii = ii + 1
r1 = (v1 * t * escr)
r2 = (-v2 * (dt - t) * escr)
If r1 > k * dt * escr Or r1 < 0 Then r1 = 0
If r2 > k * dt * escr Or r2 < 0 Then r2 = 0
form2.Line (xo + t * escx, yo - r1 / 2 / escr * escy)-(xo + t * escx, yo - r2 / escr * escy / 2),
&H8080&
xct1 = xct + (velvienX * (t - ti) * escr)
yct1 = yct - (velvieny * (t - ti) * escr)
'coloca la dirección dela tormenta
FillStyle = 0
FillColor = vbRed
Circle (xct1, yct1), 30, vbRed
Circle (xct, yct), 30, vbRed
'dibujo los circulos de la tormenta

```

```

If td < 1 Then
    r3 = r2
    r2 = r1
    r1 = r3
End If
FillColor = &HFF0000
'DrawStyle = 2
DrawStyle = 5
FillStyle = 7
Circle (xct1, yct1), r1, &HFF0000
FillStyle = 7
If clave <> 1 Then
    FillColor = vbGreen
Else
    FillColor = &HFF0000
End If
Circle (xct1, yct1), r2
DrawStyle = 0
If clave <> 1 Then
    Image1.Refresh
End If
I = 0
'coordenadas de estaciones
tx(1) = 11307.094
ty(1) = 7069.59
tx(2) = 9757.051
ty(2) = 11603.081
tx(3) = 11851.703
ty(3) = 5979.888
tx(4) = 14323.394
ty(4) = 7235.956
tx(5) = 10251.389
ty(5) = 7069.59
tx(6) = 11675.753
ty(6) = 4940.096
If CheckC = 1 Then
    NestExi = 7
    tx(7) = xctmax
    ty(7) = yctmax
Else
    NestExi = 6
End If

For I = 1 To NestExi
    r = ((xct1 - tx(I)) ^ 2 + (yct1 - ty(I)) ^ 2) ^ 0.5
    r = r / escr
    'aumento para impedir problemas con n menores que uno
    '-----
    If dt - r / k < 0 Then
        P(ii, I) = 0
        GoTo 6
    End If
    '-----
    tii = r * td / k / dt
    tff = dt - r * (dt - td) / k / dt
    pmax1 = PRE * ((dt - r / k) / dt) ^ n
    If dt - r / k <= DELTAT Or pmax1 < 0.0001 Then
        P(ii, I) = 0
        GoTo 6
    End If
    If t + DELTAT >= tff Then
        If (t < tff) And (tff <= (t + DELTAT)) Then

```

```

P1 = -(t - tii) / k2 / (dt - r / k)
P2 = -(tff - t) / k2 / (dt - r / k)
P(ii, l) = pmax1 * 10 ^ P1 * (1 - 10 ^ P2) / k3
Else
    P(ii, l) = 0
    GoTo 6
End If
Else
    If (t < tii) And (tii < (t + DELTAT)) Then
        P2 = -(t + DELTAT - tii) / k2 / (dt - r / k)
        P1 = 0
        P(ii, l) = pmax1 * 10 ^ P1 * (1 - 10 ^ P2) / k3
    Else
        If (t + DELTAT) <= tii Then
            P(ii, l) = 0
            GoTo 6
        Else
            P1 = -(t - tii) / k2 / (dt - r / k)
            P2 = -DELTAT / k2 / (dt - r / k)
            P(ii, l) = pmax1 * 10 ^ P1 * (1 - 10 ^ P2) / k3
        End If
    End If
End If
6
P(ii, l) = P(ii - 1, l) + P(ii, l)
'patron de tormenta en el tiempo
If P(ii, l) = P(ii - 1, l) Then
    Else
        If P(ii, l) <> 0 Then
            FillStyle = 7
            Select Case l
            Case 1
                'Q.OBSERVATORIO
                cas1 = cas1 + 1
                DrawWidth = 2
                If Check1.Value = 1 Then
                    form2.PSet (pix + (hora - horaini) * escx + (t - ti) * escx, poy - P(ii, l) *
40), vbRed
                End If
                If cas1 = 1 Then
                    INI(1) = ii - 1
                    End If
                    FIN(1) = ii - 1
                Case 2
                    'iZOBAMBA
                    cas2 = cas2 + 1
                    DrawWidth = 2
                    If Check2.Value = 1 Then
                        form2.PSet (pix + (hora - horaini) * escx + (t - ti) * escx, poy - P(ii, l) *
40), vbGreen
                    End If
                    If cas2 = 1 Then
                        INI(2) = ii - 1
                        End If
                        FIN(2) = ii - 1
                    Case 3
                        'iNAQUITO
                        cas3 = cas3 + 1
                        DrawWidth = 2
                        If Check3.Value = 1 Then
                            form2.PSet (pix + (hora - horaini) * escx + (t - ti) * escx, poy - P(ii, l) *
40), vbMagenta
                        End If

```



```

        If cas3 = 1 Then
            INI(3) = ii - 1
        End If
        FIN(3) = ii - 1
    Case 4
        'tola
        cas4 = cas4 + 1
        DrawWidth = 2
        If Check4.Value = 1 Then
            form2.PSet (pix + (hora - horaini) * escx + (t - ti) * escx, poy - P(ii, l) *
40), vbYellow
        End If
        If cas4 = 1 Then
            INI(4) = ii - 1
        End If
        FIN(4) = ii - 1
    Case 5
        'chorrera
        cas5 = cas5 + 1
        DrawWidth = 2
        If Check5.Value = 1 Then
            form2.PSet (pix + (hora - horaini) * escx + (t - ti) * escx, poy - P(ii, l) *
40), vbBlack
        End If
        If cas5 = 1 Then
            INI(5) = ii - 1
        End If
        FIN(5) = ii - 1
    Case 6
        'aeropuerto
        cas6 = cas6 + 1
        DrawWidth = 2
        If Check6.Value = 1 Then
            form2.PSet (pix + (hora - horaini) * escx + (t - ti) * escx, poy - P(ii, l) *
40), vbBlue
        End If
        If cas6 = 1 Then
            INI(6) = ii - 1
        End If
        FIN(6) = ii - 1
    Case 7
        'centro de tormenta arcview
        cas7 = cas7 + 1
        DrawWidth = 2
        If Check6.Value = 1 Then
            form2.PSet (pix + (hora - horaini) * escx + (t - ti) * escx, poy - P(ii, l) *
40), vbWhite
        End If
        If cas7 = 1 Then
            INI(7) = ii - 1
        End If
        FIN(7) = ii - 1
    End Select
    DrawWidth = 1
End If
FillStyle = 1
End If
Next l
'localización de estaciones de medición
'Q.OBSERVATORIO
FillStyle = 0
FillColor = vbRed

```

```

Circle (11307.09375, 7069.58958333317), 75, vbBlack
Me.CurrentX = 10600
Me.CurrentY = 7200
Print "Q.OBSERVATORIO"
'iZOBAMBA
FillColor = vbGreen
Circle (9757.05069444472, 11603.08125), 75, vbBlack
Me.CurrentX = 9350
Me.CurrentY = 11800
Print "IZOBAMBA"
'iNAQUITO
FillColor = vbMagenta
Circle (11851.703472222, 5979.88791666684), 75, vbBlack
Me.CurrentX = 11450
Me.CurrentY = 6200
Print "INAQUITO"
'tola
FillColor = vbYellow
Circle (14323.3937499998, 7235.95625), 75, vbBlack
Me.CurrentX = 14200
Me.CurrentY = 7400
Print "TOLA"
'chorrera
FillColor = vbBlack
Circle (10251.3887500001, 7069.58958333317), 75, vbBlack
Me.CurrentX = 9500
Me.CurrentY = 7200
Print "CHORRERA"
'Aeropuerto
FillColor = vbBlue
Circle (11675.7526388888, 4940.09625), 75, vbBlack
Me.CurrentX = 11100
Me.CurrentY = 5040
Print "AEROPUERTO"

```

Next t

Call buscar\_Click

```

    DrawStyle = 0
    PIXX = 4700
    form2.ForeColor = vbRed
    Me.CurrentX = PIXX: Me.CurrentY = poy - 1700: Print Format(P(FIN(1), 1), "00.0
mm Qobs")
    Me.CurrentX = PIXX - 700: Me.CurrentY = poy - 1700: Print Format(((FIN(1) -
INI(1)) * DELTAT) * 60, "00 min")
    form2.ForeColor = vbGreen
    Me.CurrentX = PIXX: Me.CurrentY = poy - 1400: Print Format(P(FIN(2), 2), "00.0
mm-Izobamba")
    Me.CurrentX = PIXX - 700: Me.CurrentY = poy - 1400: Print Format(((FIN(2) -
INI(2)) * DELTAT) * 60, "00 min")
    form2.ForeColor = vbMagenta
    Me.CurrentX = PIXX: Me.CurrentY = poy - 1100: Print Format(P(FIN(3), 3), "00.0
mm-Iñaquito")
    Me.CurrentX = PIXX - 700: Me.CurrentY = poy - 1100: Print Format(((FIN(3) -
INI(3)) * DELTAT) * 60, "00 min")
    form2.ForeColor = vbYellow
    Me.CurrentX = PIXX: Me.CurrentY = poy - 800: Print Format(P(FIN(4), 4), "00.0
mm-Tola")
    Me.CurrentX = PIXX - 700: Me.CurrentY = poy - 800: Print Format(((FIN(4) -
INI(4)) * DELTAT) * 60, "00 min")
    form2.ForeColor = vbBlack
    Me.CurrentX = PIXX: Me.CurrentY = poy - 500: Print Format(P(FIN(5), 5), "00.0
mm-Chorrera")

```



```

    Me.CurrentX = PIXX - 700: Me.CurrentY = poy - 500: Print Format(((FIN(5) -
INI(5)) * DELTAT) * 60, "00 min")
    form2.ForeColor = vbBlue
    Me.CurrentX = PIXX: Me.CurrentY = poy - 200: Print Format(P(FIN(6), 6), "00.0
mm-Aeropuerto")
    Me.CurrentX = PIXX - 700: Me.CurrentY = poy - 200: Print Format(((FIN(6) -
INI(6)) * DELTAT) * 60, "00 min")
    form2.ForeColor = vbWhite
    If CheckC = 1 Then
        PRECC1 = Format(P(FIN(7), 7), "00.0 mm")
        DURC1 = Format(((FIN(7) - INI(7)) * DELTAT) * 60, "00.0 ")
    End If
    diferencia1 = 0: diferencia2 = 0: diferencia3 = 0: cne = 0
    mAJUSTE = 0.196 / 100 ' NÚMERO DE MÁXIMO AJUSTE MEDIO
    ' NÚMERO DE AJUSTE 0-50 BUENO
    ' NÚMERO DE AJUSTE 50-75 MEDIANAMENTE BUENO
    ' NÚMERO DE AJUSTE 75- MALO
    For J = 1 To 6 Step 1
        If (NP(J) <> 0) And (FIN(J) <> 0) Then
            cne = cne + 1
            diferencia1 = Abs((t1(1, J) - (INI(J) * DELTAT + hora))) / dt * 4 / 13 + diferencia1
            diferencia2 = Abs((t1(NP(J), J) - (FIN(J) * DELTAT + hora))) / dt * 4 / 13 +
diferencia2
            diferencia3 = Abs(Pr(NP(J), J) - P(FIN(J), J)) / PRE * 5 / 13 + diferencia3
        End If
        'ENCERA PARA LA SIGUIENTE CORRIDA
        INI(J) = 0
        FIN(J) = 0
    Next J
    total = (diferencia1 + diferencia2 + diferencia3) / cne / mAJUSTE
    residuo.Text = Format(total, "###.##") + " En " + Format(cne, "# Estaciones")
End Sub
Private Sub Salir_Click()
End
End Sub
Public Sub buscar_Click()
form2.Line (0, 5070)-(6360, 8500), &HEEA000, BF
Dim HO(25)
Dim PRE(25)
horaini = Val(horaini1.Text)
t1(0, 1) = pix * escx: t1(0, 2) = 0: t1(0, 3) = 0: t1(0, 4) = 0: t1(0, 5) = 0: t1(0, 6) = 0
'3.A.- GRAFICO DE PATRON DE TORMENTA REAL
    pix = 800
    poyR = 7600 'eje en y de dibujo de precipitacion en corte
    'DrawStyle = 0
    Me.CurrentX = 2500
    Me.CurrentY = poyR - 2500
    Me.FontSize = 13
    Print "TORMENTA REGISTRADA"
    Me.FontSize = 9
    Me.CurrentX = pix - 750
    Me.CurrentY = poyR - 1700
    Print "P(mm)"
    Me.CurrentX = pix - 270: Me.CurrentY = poyR - 2100: Print "50"
    Me.CurrentX = pix - 270: Me.CurrentY = poyR - 1700: Print "40"
    Me.CurrentX = pix - 270: Me.CurrentY = poyR - 1300: Print "30"
    Me.CurrentX = pix - 270: Me.CurrentY = poyR - 900: Print "20"
    Me.CurrentX = pix - 270: Me.CurrentY = poyR - 500: Print "10"
    'lineas de patron temporal de tormenta
    pixF = pix + nhora * escx
    form2.Line (pix - 50, poyR)-(pixF, poyR), vbWhite ' HORIZONTAL
    form2.Line (pix, poyR - 2100)-(pix, poyR + 100), vbWhite ' VERTICAL LARGA

```



```

'flechas verticales
form2.Line (pix, poyR - 2100)-(pix - 50, poyR - 2000), vbWhite
form2.Line (pix - 50, poyR - 2000)-(pix + 50, poyR - 2000), vbWhite
form2.Line (pix + 50, poyR - 2000)-(pix, poyR - 2100), vbWhite
'flechas horizontales
form2.Line (pixF + 50, poyR)-(pixF - 50, poyR - 50), vbWhite
form2.Line (pixF - 50, poyR - 50)-(pixF - 50, poyR + 50), vbWhite
form2.Line (pixF - 50, poyR + 50)-(pixF + 50, poyR), vbWhite
'lineas horizontales de division
escvpre = 40
pixi = pix - 50: pixd = pix + 50
For I = 1 To 4
form2.Line (pixi, poyR - I * escvpre * 10)-(pixd, poyR - I * escvpre * 10), vbWhite
Next I
'lineas verticales de division
For I = 1 To nhora - 1
form2.Line (pix + I * escx, poyR)-(pix + I * escx, poyR + 100), vbWhite
Next I
For ff = horaini To horaini + nhora Step 1
Me.CurrentY = poyR + 100
Me.CurrentX = 625 + escx * (ff - horaini)
Print ff ' imprime los valores de los ejes en x
Next ff
Me.CurrentY = poyR + 50
Me.CurrentX = 4500
Print "Tiempo(h)"
If Check7 = 1 Then
ARCHIVO = "C:\FRANKLIN\TESISDEF\MATRIZ\QOBS.TXT"
Open ARCHIVO For Input As #1
NP(1) = 0
Do While Not EOF(1)
Input #1, A, M, D, DU, n1
For I = 1 To n1
Input #1, HO(I), PRE(I)
Next I
If A = ANIO And M = MES And D = DIA Then
NP(1) = n1
For I = 1 To n1
t1(I, 1) = HO(I)
Pr(I, 1) = PRE(I)
Next I
End If
Loop
Close #1
For I = 2 To NP(1)
DrawWidth = 2
form2.Line (pix + (t1(I, 1) - horaini) * escx, poyR - Pr(I, 1) * 40)-(pix + (t1(I - 1, 1) - horaini) * escx, poyR - Pr(I - 1, 1) * 40), vbRed
DrawWidth = 1
Next I
form2.ForeColor = vbRed
Me.CurrentX = 4700: Me.CurrentY = (poyR - 1700): Print Format((Pr(NP(1), 1) - Pr(1, 1)), "00.0 mm Qobs")
Me.CurrentX = 4700 - 700: Me.CurrentY = (poyR - 1700): Print Format((t1(NP(1), 1) - t1(1, 1)) * 60, "00 min")
form2.ForeColor = vbWhite
End If
If Check8 = 1 Then
ARCHIVO = "C:\FRANKLIN\TESISDEF\MATRIZ\IZOB.TXT"
Open ARCHIVO For Input As #1
NP(2) = 0
Do While Not EOF(1)

```

```

Input #1, A, M, D, DU, n1
For I = 1 To n1
    Input #1, HO(I), PRE(I)
Next I
If A = ANIO And M = MES And D = DIA Then
    NP(2) = n1
    For I = 1 To n1
        t1(I, 2) = HO(I)
        Pr(I, 2) = PRE(I)
    Next I
End If
Loop
Close #1
For I = 2 To NP(2)
    DrawWidth = 2
    form2.Line (pix + (t1(I, 2) - horaini) * escx, poyR - Pr(I, 2) * 40)-(pix + (t1(I - 1, 2) -
horaini) * escx, poyR - Pr(I - 1, 2) * 40), vbGreen
    DrawWidth = 1
Next I
form2.ForeColor = vbGreen
Me.CurrentX = 4700: Me.CurrentY = (poyR - 1400): Print Format((Pr(NP(2), 2) - Pr(1,
2)), "00.0 mm Izobamba")
Me.CurrentX = 4700 - 700: Me.CurrentY = (poyR - 1400): Print Format((t1(NP(2), 2) -
t1(1, 2)) * 60, "00 min")
form2.ForeColor = vbWhite
End If
If Check9 = 1 Then
    ARCHIVO = "C:\FRANKLIN\TESISDEF\MATRIZ\INIA.TXT"
    Open ARCHIVO For Input As #1
    NP(3) = 0
    Do While Not EOF(1)
        Input #1, A, M, D, DU, n1
        For I = 1 To n1
            Input #1, HO(I), PRE(I)
        Next I
        If A = ANIO And M = MES And D = DIA Then
            NP(3) = n1
            For I = 1 To n1
                t1(I, 3) = HO(I)
                Pr(I, 3) = PRE(I)
            Next I
        End If
    Loop
    Close #1
    For I = 2 To NP(3)
        DrawWidth = 2
        form2.Line (pix + (t1(I, 3) - horaini) * escx, poyR - Pr(I, 3) * 40)-(pix + (t1(I - 1, 3) -
horaini) * escx, poyR - Pr(I - 1, 3) * 40), vbMagenta
        DrawWidth = 1
    Next I
    form2.ForeColor = vbMagenta
    Me.CurrentX = 4700: Me.CurrentY = (poyR - 1100): Print Format((Pr(NP(3), 3) - Pr(1,
3)), "00.0 mm Iñaquito")
    Me.CurrentX = 4700 - 700: Me.CurrentY = (poyR - 1100): Print Format((t1(NP(3), 3) -
t1(1, 3)) * 60, "00 min")
    form2.ForeColor = vbWhite
End If
If Check10 = 1 Then
    ARCHIVO4 = "C:\FRANKLIN\TESISDEF\MATRIZ\TOLA.TXT"
    Open ARCHIVO4 For Input As 1
    NP(4) = 0
    Do While Not EOF(1)

```

```

Input #1, A, M, D, DU, n1
For I = 1 To n1
    Input #1, HO(I), PRE(I)
Next I
If A = ANIO And M = MES And D = DIA Then
    NP(4) = n1
    For I = 1 To n1
        t1(I, 4) = HO(I)
        Pr(I, 4) = PRE(I)
    Next I
End If
Loop
Close #1
For I = 2 To NP(4)
    DrawWidth = 2
    form2.Line (pix + (t1(I, 4) - horaini) * escx, poyR - Pr(I, 4) * 40)-(pix + (t1(I - 1, 4) - horaini) * escx, poyR - Pr(I - 1, 4) * 40), vbYellow
    DrawWidth = 1
Next I
form2.ForeColor = vbYellow
Me.CurrentX = 4700: Me.CurrentY = (poyR - 800): Print Format((Pr(NP(4), 4) - Pr(1, 4)), "00.0 mm Tola")
Me.CurrentX = 4700 - 700: Me.CurrentY = (poyR - 800): Print Format((t1(NP(4), 4) - t1(1, 4)) * 60, "00 min")
form2.ForeColor = vbWhite
End If
If Check11 = 1 Then
    ARCHIVO5 = "C:\FRANKLIN\TESISDEF\MATRIZ\CHOR.TXT"
    Open ARCHIVO5 For Input As 1
    NP(5) = 0
    Do While Not EOF(1)
        Input #1, A, M, D, DU, n1
        For I = 1 To n1
            Input #1, HO(I), PRE(I)
        Next I
        If A = ANIO And M = MES And D = DIA Then
            NP(5) = n1
            For I = 1 To n1
                t1(I, 5) = HO(I)
                Pr(I, 5) = PRE(I)
            Next I
        End If
    Loop
    Close #1
    For I = 2 To NP(5)
        DrawWidth = 2
        form2.Line (pix + (t1(I, 5) - horaini) * escx, poyR - Pr(I, 5) * 40)-(pix + (t1(I - 1, 5) - horaini) * escx, poyR - Pr(I - 1, 5) * 40), vbBlack
        DrawWidth = 1
    Next I
    form2.ForeColor = vbBlack
    Me.CurrentX = 4700: Me.CurrentY = (poyR - 500): Print Format((Pr(NP(5), 5) - Pr(1, 5)), "00.0 mm Chorrera")
    Me.CurrentX = 4700 - 700: Me.CurrentY = (poyR - 500): Print Format((t1(NP(5), 5) - t1(1, 5)) * 60, "00 min")
    form2.ForeColor = vbWhite
End If
If Check12 = 1 Then
    ARCHIVO6 = "C:\FRANKLIN\TESISDEF\MATRIZ\AERO.TXT"
    Open ARCHIVO6 For Input As 1
    NP(6) = 0
    Do While Not EOF(1)

```



```

Input #1, A, M, D, DU, n1
For I = 1 To n1
    Input #1, HO(I), PRE(I)
Next I
If A = ANIO And M = MES And D = DIA Then
    NP(6) = n1
    For I = 1 To n1
        t1(I, 6) = HO(I)
        Pr(I, 6) = PRE(I)
    Next I
End If
Loop
Close #1
For I = 2 To NP(6)
    DrawWidth = 2
    form2.Line (pix + (t1(I, 6) - horaini) * escx, poyR - Pr(I, 6) * 40)-(pix + (t1(I - 1, 6) -
horaini) * escx, poyR - Pr(I - 1, 6) * 40), vbBlue
    DrawWidth = 1
    Next I
    form2.ForeColor = vbBlue
    Me.CurrentX = 4700: Me.CurrentY = (poyR - 200): Print Format((Pr(NP(6), 6) - Pr(1,
6)), "00.0 mm Aeropuerto")
    Me.CurrentX = 4700 - 700: Me.CurrentY = (poyR - 200): Print Format((t1(NP(6), 6) -
t1(1, 6)) * 60, "00 min")
    form2.ForeColor = vbWhite
End If
End Sub
Private Sub image1_mouseDown(Button As Integer, shift As Integer, X As Single, Y As
Single)
    txtraton.Text = "Click en: " & X & ", " & Y
    COORX1.Text = (760000 + X * 40000 / 10850)
    COORY1.Text = (9955000 + (10850 - Y) * 40000 / 10850)
    If clave3 = 1 Then
        inicx = X
        inicy = Y
        limisup.Value = False
    End If
    If clave4 = 1 Then
        finax = X
        finay = Y
        limiinf.Value = False
    End If
End Sub
Private Sub VScroll1_Change()
    TXTDES.Text = VScroll1.Value
End Sub
Private Sub VScroll2_Change()
    TXTDUR.Text = VScroll2.Value
End Sub
Private Sub VScroll3_Change()
    TXTVEL.Text = VScroll3.Value
End Sub
Private Sub VScroll4_Change()
    TXTPRE.Text = VScroll4.Value
End Sub
Private Sub VScroll5_Change()
    TXTCOE.Text = VScroll5.Value
End Sub

```

**PROGRAMA: MISION**  
**VERSION: 1.0**  
**AUTOR: Ing. Franklin Beltrán**  
**FECHA: Noviembre 2003**  
**LENGUAJE: VisualBasic**

```
Dim xo As Single
Dim yo As Single
Public escy As Integer
Public escr As Integer
Public escx As Integer
Dim r1 As Single
Public xt1 As Single
Public xt2 As Single
Public xt As Single
Public PRE As Single
Public td As Single
Public dt As Single
Public ti As Single
Public tf As Single
Public t As Single
Public v1 As Single
Public v2 As Single
Public k As Single
Public k1 As Single
Public k2 As Single
Public n As Single
Public rmax As Single
Public clave As Single
Private t1(25, 6) As Single
Private P(0 To 800, 0 To 6) As Single
Public velvienX As Single
Public velvieny As Single
Public inicx As Single
Public finax As Single
Public inicy As Single
Public finay As Single
Public PIXX As Integer
Public nhora As Integer
Public deltat As Single
Public deltat2 As Single
Public hora As Single
Private G(0 To 121, 0 To 311) As Single
Public STRARCHIVO As String
Private nn As Integer
Private Sub Calcule_Click()
    PRE = Val(TXTPRE.Text)
    dt = Val(TXTDUR.Text)
    n = Val(TXTCOE.Text)
    td = Val(TXTDES.Text)
    k = Val(TXTVEL.Text)
    k2 = Val(TXTTEMP.Text)
    hora = Val(horajuste.Text)
    k1 = PRE / (dt ^ n)
    rmax = k * dt
    velvienX = Val(VELX.Text)
    velvieny = Val(VELY.Text)
    deltat = Val(intervalo.Text)
    deltat2 = Val(Text24.Text) / 60
    If td = 0 Then
        v1 = 10000000000#
```

```

Else
    v1 = k * dt / td
End If
If dt = td Then
    v2 = 100000000000#
Else
    v2 = -k * dt / (dt - td)
End If
TXTV1.Text = Format(v1, "###.##")
TXTV2.Text = Format(v2, "###.##")
'1.- GRAFICO DE REPRESENTACION MATEMATICA DE TORMENTA
pix = 1000 ' PUNTO DE INICIO EN X PARA DIBUJO DE eje de coordenaadas
piy = 11500 ' PUNTO DE INICIO EN Y PARA DIBUJO DE eje de coordeandas
ly = 3600 ' LONGITUD DE EJE Y debe ser multiplo de 400
lx = 5600 ' LONGITUD DE EJE X
dx = 400 ' INTERVALO DE X
dy = 400 ' INTERVALO DE Y
r = 50
escx = 400 ' ESCALA EN X CADA UNIDAD = dx/escx
escy = 200 ' ESCALA EN y CADA UNIDAD = dy/escx
escr = Image1.Width * 1000 / 40000
'ejes
xo = pix + 2 * dx ' inicio de punto de linea horizontal, punto izquierdo
yo = piy + ly - 2 * dy ' inicio de punto de linea vertical,punto bajo
form2.Line (xo, piy)-(xo, piy + ly - dy), vbWhite
form2.Line (xo - dx + 250, piy + ly - 2 * dy)-(pix + lx - dx + 500, piy + ly - 2 * dy), vbWhite
'flechas horizontales
form2.Line (pix + lx, piy + ly - 2 * dy - 50)-(pix + lx + 100, piy + ly - 2 * dy), vbWhite
form2.Line (pix + lx + 100, piy + ly - 2 * dy)-(pix + lx, piy + ly - 2 * dy + 50), vbWhite
'flechas verticales
form2.Line (xo - 50, piy)-(xo, piy - 100), vbWhite
form2.Line (xo, piy - 100)-(xo + 50, piy), vbWhite
Me.CurrentX = pix - 500
Me.CurrentY = piy
Print "Distancia(Km)"
Me.CurrentX = pix + lx - 700
Me.CurrentY = piy + ly - 300
Print "Tiempo(h)"
Me.CurrentX = 2800
Me.CurrentY = piy - 840
Me.FontSize = 13
Print "MODELO"
Me.FontSize = 9
'unidades
For X = pix To pix + lx - 800 Step dx
    form2.Line (X + 800, piy + ly - 2 * dy - r)-(X + 800, piy + ly - 2 * dy + r), vbWhite
    Me.CurrentX = (X - 80 + 730)
    If (X / escx) <> 0 Then
        Print X / escx - 1.25 ' imprime los valores de los ejes en x
    End If
Next X
For Y = (piy) To (piy + ly - 2 * dy) Step dy
    form2.Line (pix + 2 * dx - r, Y)-(pix + 2 * dx + r, Y), vbWhite
    Me.CurrentX = xo - 300
    Print (28 + (piy - Y) / escy * 2) ' imprime los valores de los ejes en y
Next Y
'lineas de velocidad
form2.Line (xo, yo)-(xo + td * escx, (yo - rmax * escy / 2)), vbWhite
Me.CurrentX = CurrentX - 1500
Me.CurrentY = CurrentY - 250
Print "Rmax="; Format(rmax, "####.00 Km")
form2.Line (xo + td * escx, (yo - rmax * escy / 2))-(xo + dt * escx, yo), vbWhite

```



```

'lineas de dimensiones
form2.Line (xo + td * escx, (yo - rmax * escy / 2))-(xo, (yo - rmax * escy / 2)), vbRed
form2.Line (xo + td * escx, (yo - rmax * escy / 2))-(xo + td * escx, yo), vbRed
yl = yo + 300
ytd = yo + 700
form2.Line (xo, yl)-(xo + dt * escx, yl), vbRed 'duracion de tormenta
form2.Line (xo - 50, yl + 50)-(xo + 50, yl - 50), vbRed 'auxiliares duracion de tormenta
form2.Line (xo + dt * escx - 50, yl + 50)-(xo + dt * escx + 50, yl - 50), vbRed 'auxiliares
xm = (xo + xo + dt * escx) / 2 - 200
Me.CurrentX = xm
Me.CurrentY = yl + 50
Print "DT="; dt
xm = (xo + xo + td * escx) / 2 - 200
Me.CurrentX = xm
Me.CurrentY = ytd - 100
Print "Td="; td
'3.- GRAFICO DE PATRON DE TORMENTA SINTETICO
poy = 14320 'eje en y de dibujo de precipitacion en corte
DrawStyle = 0
pix = 8000
Me.CurrentX = pix - 750
Me.CurrentY = poy - 1700
Print "P(mm)"
Me.CurrentX = pix
Me.CurrentY = poy - 3000
Me.FontSize = 13
Print "TORMENTA SIMULADA"
Me.FontSize = 9
Me.CurrentX = pix + 6000
Me.CurrentY = poy - 2000
Print "Dur(min)  P(mm)  Estación"
Me.CurrentX = pix - 270: Me.CurrentY = poy - 2100: Print "50"
Me.CurrentX = pix - 270: Me.CurrentY = poy - 1700: Print "40"
Me.CurrentX = pix - 270: Me.CurrentY = poy - 1300: Print "30"
Me.CurrentX = pix - 270: Me.CurrentY = poy - 900: Print "20"
Me.CurrentX = pix - 270: Me.CurrentY = poy - 500: Print "10"
'lineas de patron temporal de tormenta
nhora = 8
pixF = pix + nhora * escx
form2.Line (pix - 50, poy)-(pixF, poy), vbWhite ' HORIZONTAL
form2.Line (pix, poy - 2100)-(pix, poy + 100), vbWhite ' VERTICAL LARGA
'flechas verticales
form2.Line (pix, poy - 2100)-(pix - 50, poy - 2000), vbWhite
form2.Line (pix - 50, poy - 2000)-(pix + 50, poy - 2000), vbWhite
form2.Line (pix + 50, poy - 2000)-(pix, poy - 2100), vbWhite
'flechas horizontales
form2.Line (pixF + 50, poy)-(pixF - 50, poy - 50), vbWhite
form2.Line (pixF - 50, poy - 50)-(pixF - 50, poy + 50), vbWhite
form2.Line (pixF - 50, poy + 50)-(pixF + 50, poy), vbWhite
'lineas horizontales de division
escvpre = 40
pixi = pix - 50: pixd = pix + 50
For I = 1 To 4
form2.Line (pixi, poy - I * escvpre * 10)-(pixd, poy - I * escvpre * 10), vbWhite
Next I
'lineas verticales de division
For I = 1 To nhora - 1
form2.Line (pix + I * escx, poy)-(pix + I * escx, poy + 100), vbWhite
Next I
For FF = HORAINI.Text To HORAINI.Text + nhora Step 1
Me.CurrentY = poy + 100
Me.CurrentX = pix + escx * (FF - HORAINI.Text)

```

```

Print FF ' imprime los valores de los ejes en x
Next FF
Me.CurrentY = poy + 50
Me.CurrentX = pix - 500
Print "Tiempo(h)"
'-----
'coordenadas de estación virtual
End Sub
Private Sub ABRIR_Click()
Dim strtexto As String
Dim NIXX As Integer
Dim NIYY As Integer
Dim H(119 + 2, 309 + 2) As Single
Dim tc(119 + 2, 309 + 2) As Single
Dim g1 As Integer
strArchivDir = directorio.Text
strArchivFile = file.Text
Open strArchivDir + strArchivFile For Input As #1
Screen.MousePointer = vbHourglass
Input #1, NIXX, NIYY, COORDXMIN, COORDYMIN, LCELDA, NODATO
For I = 1 To NIYY
    For J = 1 To NIXX
        Input #1, H(I, J)
    Next J
Next I
Close #1
strArchivFileFlujo = FLUJO.Text
Open strArchivDir + strArchivFileFlujo For Output As #2
For I = 1 To NIYY
    For J = 1 To NIXX
        gmin = 0: S = 0: c = 0: c2 = 0
        For X = I - 1 To I + 1
            For Y = J - 1 To J + 1
                S = S + 1
                If S = 6 Then g1 = 1
                If S = 9 Then g1 = 2
                If S = 8 Then g1 = 3
                If S = 7 Then g1 = 4
                If S = 4 Then g1 = 5
                If S = 1 Then g1 = 6
                If S = 2 Then g1 = 7
                If S = 3 Then g1 = 8
                If S = 5 Then g1 = 0
                If X = I And Y = J Then GoTo 2
                If X = 0 Or X = (NIYY + 1) Or Y = 0 Or Y = (NIXX + 1) Then
                    c2 = c2 + 1
                    GoTo 2
                End If
                gr = ((H(X, Y) - H(I, J)) / ((X - I) ^ 2 + (Y - J) ^ 2) ^ 0.5)
                If gr <= gmin Then
                    gmin = gr
                    G(I, J) = g1
                Else
                    c = c + 1
                    If c = 9 - c2 Then
                        G(I, J) = 0
                    End If
                End If
            Next Y
        Next X
        Print #2, G(I, J);
    Next J
2
Next I
Next J

```

```

Print #2,
Next I
Close #2
FF = 1
COLUMNAS.Text = NIXX
FILAS.Text = NIYY
Text20.Text = COORDXMIN
Text15.Text = COORDYMIN
Text14.Text = LCELDA
Screen.MousePointer = vbDefault
Open strArchivDir + "numero.asc" For Output As #3
Open strArchivDir + "TIEMPOC.asc" For Input As #1
For I = 1 To NIYY
    For J = 1 To NIXX
        Input #1, tc(I, J)
        If tc(I, J) <> -9999 Then
            Select Case tc(I, J)
                Case deltat
                    nn = 2
                Case 2 * deltat
                    nn = 3
                Case 3 * deltat
                    nn = 4
                Case 4 * deltat
                    nn = 5
                Case 5 * deltat
                    nn = 6
                Case 6 * deltat
                    nn = 7
                Case 7 * deltat
                    nn = 8
                Case 8 * deltat
                    nn = 9
                Case 9 * deltat
                    nn = 10
                Case Else
                    nn = Int(tc(I, J) / deltat) + 2
            End Select
        Else
            nn = 0
        End If
        If J <> NIXX Then
            Print #3, nn;
        Else
            Print #3, nn
        End If
    Next J
Next I
Close #1
Close #3
End Sub
Public Sub Simule_Click()
    Dim P(121, 311) As Single
    Dim Pe(121, 311) As Single
    Dim PT(121, 311) As Single
    Dim PeT(121, 311) As Single
    Dim q(121, 311, 14) As Single
    Dim qt(121, 311) As Single
    Dim QA(121, 311) As Single
    Dim tc(121, 311) As Single
    Dim nn(121, 311) As Integer
    Dim varAntes, Vardespues, varDifTemp As Variant

```



```

Dim QINT(2) As Single
Dim PINT(2) As Single
Dim PEINT(2) As Single
varAntes = Timer
strArchivDir = directorio.Text
caudal$ = "caudal"
ACUMU = Val(ALMA.Text)
deltat = Val(intervalo.Text) / 60
cn = Val(FITEXT.Text)
LCELL = Val(Text14.Text)
nix = Val(COLUMNAS.Text)
niy = Val(FILAS.Text)
hora = Val(horajuste.Text)
ox = Val(Text20.Text)
oy = Val(Text15.Text)
COORXO = Val(COORXO.Text)
COORYO = Val(COORYO.Text)
horaf = Val(horafin.Text)
AREA = LCELL ^ 2 / 3600000 ' INCLUYE EL FACTOR DE CONVERSION DEL TIEMPO
ss = (1000 / cn - 10) * 25.4
If td <= 0 Then
    tii = td
Else
    tii = 0
End If
If td < dt Then
    tff = dt
Else
    tff = td
End If
k3 = 1 - 10 ^ (-1 / k2))
Open strArchivDir + "TIEMPOC.asc" For Input As #1
For I = 1 To niy
    For J = 1 To nix
        Input #1, tc(I, J)
    Next J
Next I
Close #1
'=====
Open strArchivDir + caudal$ + ".res" For Append As #2
QINT(1) = 0: PINT(1) = 0: PEINT(1) = 0
For t = tii To horaf Step deltat
    r1 = (v1 * (t + deltat))
    R2 = (-v2 * (dt - (t + deltat)))
    ' SUBROUTINA DE GENERACION DE RADIO INTERNO Y EXTERNO
    '=====
    'caso a:
    If td <= 0 Then
        If t < 0 And t >= td Then
            RI = r1
            RE = R2
        End If
        If t <= dt And t >= 0 Then
            RI = 0
            RE = R2
        End If
    End If
    'caso b:
    If td > 0 Then
        If td <= dt Then
            If t + deltat <= td And t + deltat > 0 Then
                RI = 0
            End If
        End If
    End If
Next t
Close #2

```

```

    RE = r1
End If
If t + deltat < dt And t + deltat > td Then
    RI = 0
    RE = R2
End If
End If
If td > dt Then
    If t < dt And t >= 0 Then
        RI = 0
        RE = r1
    End If
    If t <= td And t >= dt Then
        RI = R2
        RE = r1
    End If
End If
End If
"=====
For I = 1 To niy
    For J = 1 To nix
        If tc(I, J) = -9999 Then GoTo 7
        If t > tff Then
            P(I, J) = 0
            GoTo 6
        End If
        nn(I, J) = Int(tc(I, J) / (deltat * 60)) + 2
        X = ((J - 0.5) * LCELL + ox)
        Y = ((niy - I + 0.5) * LCELL + oy)
        px1 = COORXO + (velvienX * (t + deltat - tii) * 1000)
        py1 = COORYO + (velvieny * (t + deltat - tii) * 1000)
        r = (((px1 - X) ^ 2) + ((py1 - Y) ^ 2)) ^ (0.5) / 1000
        If r <= 0.001 Then r = 0
        If RE <= 0.001 Then RE = 0
        If RI <= 0.001 Then RI = 0
        tf = dt - r * (dt - td) / k / dt
        ti = r * td / dt / k
        If (r < rmax) Then
            pmax1 = PRE * ((dt - r / k) / dt) ^ n
            If (dt - r / k) <= deltat Or pmax1 < 0.001 Then
                P(I, J) = 0

                GoTo 6
            End If
            If t + deltat >= tf Then
                If t < tf And tf <= t + deltat Then
                    p1 = -(t - ti) / k2 / (dt - r / k)
                    p2 = -(tf - t) / k2 / (dt - r / k)

                Else
                    P(I, J) = 0

                    GoTo 6
                End If
            Else
                If t < ti And ti < t + deltat Then
                    p2 = -(t + deltat - ti) / k2 / (dt - r / k)
                    p1 = 0

                Else
                    If t + deltat <= ti Then
                        P(I, J) = 0

```

```

        GoTo 6
    Else
        p1 = -(t - ti) / k2 / (dt - r / k)
        p2 = -deltat / k2 / (dt - r / k)

    End If
End If
Else
    P(I, J) = 0
End If
P(I, J) = (pmax1 * (10 ^ p1 * (1 - 10 ^ p2) / k3))
If I = 107 And J = 299 Then
    rrrr = 1
End If

6 PT(I, J) = P(I, J) + PT(I, J)
If (PT(I, J) >= ACUMU) Then
    If (PT(I, J) - P(I, J)) >= ACUMU Then
        Pe(I, J) = P(I, J) - P(I, J) * (ss / (PT(I, J) + 0.8 * ss)) ^ 2
    Else
        Pe(I, J) = (PT(I, J) - ACUMU) - (PT(I, J) - ACUMU) * (ss / (PT(I, J) + 0.8 * ss)) ^ 2
    End If
Else
    Pe(I, J) = 0
    GoTo 8
End If

8 PeT(I, J) = PeT(I, J) + Pe(I, J)
If ((tc(I, J) / 60) <= deltat) Then
    q(I, J, 1) = q(I, J, 2) + Pe(I, J) * AREA / (deltat ^ 2) * (deltat - tc(I, J) / 2 / 60)
    q(I, J, 2) = Pe(I, J) * AREA * (tc(I, J) / 60) / 2 / (deltat ^ 2)
Else
    If nn(I, J) = 3 Then
        q(I, J, 1) = q(I, J, 2) + Pe(I, J) * AREA / (tc(I, J) / 60) / 2
        q(I, J, 2) = q(I, J, 3) + Pe(I, J) * AREA / (tc(I, J) / 60) / (deltat ^ 2) * (deltat ^ 2 - ((2 *
deltat - tc(I, J) / 60) ^ 2) / 2)
        q(I, J, 3) = Pe(I, J) * AREA / (tc(I, J) / 60) / 2 / (deltat ^ 2) * (tc(I, J) / 60 - deltat) ^ 2
    End If
    If nn(I, J) = 4 Then
        q(I, J, 1) = q(I, J, 2) + Pe(I, J) * AREA / (tc(I, J) / 60) / 2
        q(I, J, 2) = q(I, J, 3) + Pe(I, J) * AREA / (tc(I, J) / 60)
        q(I, J, 3) = q(I, J, 4) + Pe(I, J) * AREA / (tc(I, J) / 60) / (deltat ^ 2) * (deltat ^ 2 - ((3 *
deltat - tc(I, J) / 60) ^ 2) / 2)
        q(I, J, 4) = Pe(I, J) * AREA / (tc(I, J) / 60) / 2 / (deltat ^ 2) * (tc(I, J) / 60 - 2 * deltat)
^ 2
    End If
    If nn(I, J) = 5 Then
        q(I, J, 1) = q(I, J, 2) + Pe(I, J) * AREA / (tc(I, J) / 60) / 2
        q(I, J, 2) = q(I, J, 3) + Pe(I, J) * AREA / (tc(I, J) / 60)
        q(I, J, 3) = q(I, J, 4) + Pe(I, J) * AREA / (tc(I, J) / 60)
        q(I, J, 4) = q(I, J, 5) + Pe(I, J) * AREA / (tc(I, J) / 60) / (deltat ^ 2) * (deltat ^ 2 - ((4 *
deltat - tc(I, J) / 60) ^ 2) / 2)
        q(I, J, 5) = Pe(I, J) * AREA / (tc(I, J) / 60) / 2 / (deltat ^ 2) * (tc(I, J) / 60 - 3 * deltat)
^ 2
    End If
    If nn(I, J) = 6 Then
        q(I, J, 1) = q(I, J, 2) + Pe(I, J) * AREA / (tc(I, J) / 60) / 2
        q(I, J, 2) = q(I, J, 3) + Pe(I, J) * AREA / (tc(I, J) / 60)
        q(I, J, 3) = q(I, J, 4) + Pe(I, J) * AREA / (tc(I, J) / 60)
        q(I, J, 4) = q(I, J, 5) + Pe(I, J) * AREA / (tc(I, J) / 60)
    End If

```



[illegible]

[illegible]



```

7 Next J
Next I
For I = 1 To niy
For J = 1 To nix
If tc(I, J) = -9999 Then GoTo 5
qt(I, J) = q(I, J, 1) + QA(I, J)
'=====
S = 0: QP = 0
For YY = I - 1 To I + 1
For XX = J - 1 To J + 1
S = S + 1
Select Case S
Case 6
g2 = 5
Case 9
g2 = 6
Case 8
g2 = 7
Case 7
g2 = 8
Case 4
g2 = 1
Case 1
g2 = 2
Case 2
g2 = 3
Case 3
g2 = 4
Case 5
g2 = 0
End Select
If YY = I And XX = J Then GoTo 4
If YY <= 0 Or XX <= 0 Or YY = niy + 1 Or XX = nix + 1 Then GoTo 4
If G(YY, XX) = g2 Then
QP = QP + qt(YY, XX)
End If
4 Next XX
Next YY
3 QA(I, J) = QP
'=====
If I = 107 And J = 299 Then
Cls
Me.CurrentX = 100
Me.CurrentY = 5000
Print "INTERVALO DE ANALISIS = "; deltat * 60; "min"
'Me.CurrentX = 100
'Me.CurrentY = 5500
Print "TIEMPO DE ANALISIS="; t; " CAUDAL="; qt(I, J); PT(I, J); PeT(I, J)
QINT(2) = qt(I, J): PINT(2) = PT(I, J): PEINT(2) = PeT(I, J)
For KN = 1 To 100
If (t - deltat) < (KN * deltat2) And (KN * deltat2) <= t Then
QINT(1) = QINT(1) + (QINT(2) - QINT(1)) / deltat * (KN * deltat2 - (t - deltat))
PINT(1) = PINT(1) + (PINT(2) - PINT(1)) / deltat * (KN * deltat2 - (t - deltat))
PEINT(1) = PEINT(1) + (PEINT(2) - PEINT(1)) / deltat * (KN * deltat2 - (t - deltat))
Print #2, (KN * deltat2); QINT(1); PINT(1); PEINT(1)
End If
Next KN
QINT(1) = qt(I, J): PINT(1) = PT(I, J): PEINT(1) = PeT(I, J)
'Print #2, t; qt(I, J); PT(I, J); PeT(I, J)
End If
5 Next J
Next I

```



```

TXTV1.Text = Format(v1, "###.##")
Vardespues = Timer
varDifTemp = Vardespues - varAntes
TIEMPOMAQ.Text = Format((varDifTemp / 60), "###.##" + "min")
Next t
Close #2
Beep
Beep
'Close #1
'Q.OBSERVATORIO
'cas1 = cas1 + 1
'DrawWidth = 2
'pix = 5000
'form2.PSet ((pix + (hora - horaini) * escx + (t - ti) * escx), poy - P(ii, i) * 40), vbRed
'If cas1 = 1 Then
'localización de estaciones de medición
'Q.OBSERVATORIO
'FillColor = vbRed
'Circle (11307.09375, 7069.58958333317), 75, vbBlack
'Me.CurrentX = 10600
'Me.CurrentY = 7200
'Print "Q.OBSERVATORIO"
'End If
End Sub
Private Sub Salir_Click()
End
End Sub
Private Sub VScroll1_Change()
TXTDES.Text = VScroll1.Value
End Sub
Private Sub VScroll2_Change()
TXTDUR.Text = VScroll2.Value
End Sub
Private Sub VScroll3_Change()
TXTVEL.Text = VScroll3.Value
End Sub
Private Sub VScroll4_Change()
TXTPRE.Text = VScroll4.Value
End Sub
Private Sub VScroll5_Change()
TXTCOE.Text = VScroll5.Value
End Sub

```
