# Supplementary material
Source: Copernicus journal article supplement (doi:10.5194/egusphere-2026-1317)
Supplement: Supplementary file [file 4 Blandin_1989.pdf › BilbiografiaEscaneada/4 Blandin_1989.pdf]

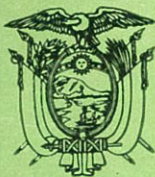

**BIBLIOTECA ECUADOR**

**ANALISIS Y ESTUDIOS CLIMATOLOGICOS  
EN EL ECUADOR**

**Por**

**Carlos Blandín Landívar**

**Cap. (r) Meteorólogo**

*Ex-Funcionario del Instituto Nacional de Meteorología  
e Hidrología y Miembro de la Sección Nacional del IPGH.*

2

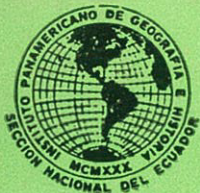

**INSTITUTO PANAMERICANO DE  
GEOGRAFIA E HISTORIA  
SECCION NACIONAL DEL ECUADOR  
QUITO - ECUADOR - 1989**

# ESTUDIO DE LAS TEMPERATURAS MINIMAS ABSOLUTAS DE LA SERIE DE QUITO 1.891 - 1.980

|        |            |             |         |                     |
|--------|------------|-------------|---------|---------------------|
| Década | 1.891-1900 | mínima Abs. | -0.0°C. | registrado en 1.893 |
| Década | 1.901-1910 | mínima Abs. | 0.0     | registrado en 1.908 |
| Década | 1.911-1920 | "           | 0.3 "   | " 1.919             |
| Década | 1.921-1930 | "           | 0.9 "   | " 1.925             |
| Década | 1.931-1940 | "           | -0.1 "  | " 1.939             |
| Década | 1.941-1950 | "           | -0.2 "  | " 1.948             |
| Década | 1.951-1960 | "           | 0.2 "   | " 1.952             |
| Década | 1.961-1970 | "           | 2.3 "   | " 1.962             |
| Década | 1.971-1980 | "           | 2.2 "   | " 1.973             |

El más bajo valor anotado en toda la serie fué -0.2°C. registrado en 1.893 y 1.948.

Los valores más altos se anotaron en las últimas décadas o sea 1.961 - 1.970 y 1.971 - 1.980 con 2.9°C. y 3.0°C. respectivamente.

Al igual que todos los parámetros de temperatura se ve claramente un incremento gradual de la temperatura de 1.891 a 1.980.

## ESTUDIO DE LAS TEMPERATURAS MAXIMAS DE LA SERIE DE QUITO

|        |             |           |          |        |
|--------|-------------|-----------|----------|--------|
| Década | 1.891-1.900 | Temp. Máx | Promedio | 24.1°C |
| Década | 1.901-1.910 | "         | "        | 24.7°C |
| Década | 1.911-1.920 | "         | "        | 25.1°C |
| Década | 1.921-1.930 | "         | "        | 25.8°C |
| Década | 1.931-1.940 | "         | "        | 26.6°C |
| Década | 1.941-1.950 | "         | "        | 27.0°C |
| Década | 1.951-1.960 | "         | "        | 26.9°C |
| Década | 1.961-1.970 | "         | "        | 25.8°C |
| Década | 1.971-1.980 | "         | "        | 25.2°C |

La mayor temperatura registrada en toda la serie fué en 1.945 con 28.5°C.

# ESTUDIO DEL NUMERO DE DIAS CON PRECIPITACIONES EN TODA LA SERIE DE QUITO 1.891 - 1.980

| AÑOS  | 1891<br>1900 | 1901<br>1910 | 1911<br>1920 | 1921<br>1930 | 1931<br>1940 | 1941<br>1950 | 1951<br>1960 | 1961<br>1970 | 1971<br>1980 |
|-------|--------------|--------------|--------------|--------------|--------------|--------------|--------------|--------------|--------------|
| 1     | 187          | 204          | 165          | 159          | 179          | 150          | 235          | 153          | 231          |
| 2     | 220          | 193          | 154          | 174          | 215          | 188          | 186          | 180          | 186          |
| 3     | 228          | 179          | 199          | 138          | 198          | 221          | 225          | 192          | 179          |
| 4     | 167          | 167          | 132          | 205          | 215          | 192          | 198          | 191          | 220          |
| 5     | 148          | 153          | 186          | 170          | 200          | 185          | 215          | 184          | 225          |
| 6     | 179          | 154          | 196          | 120          | 172          | 157          | 206          | 196          | 170          |
| 7     | 178          | 174          | 236          | 195          | 156          | 212          | 168          | 168          | 148          |
| 8     | 201          | 204          | 186          | 202          | 181          | 161          | 178          | 181          | 161          |
| 9     | 188          | 214          | 166          | 178          | 194          | 195          | 184          | 199          | 159          |
| 10    | 194          | 211          | 136          | 186          | 173          | 241          | 174          | 196          | 180          |
| MAX   | 228          | 214          | 236          | 205          | 215          | 241          | 235          | 199          | 231          |
| Min   | 148          | 153          | 132          | 120          | 156          | 150          | 168          | 153          | 148          |
| Media | 189          | 185          | 176          | 173          | 188          | 190          | 197          | 184          | 186          |

- Los promedios de los días de lluvias de las décadas 1.941 - 1.950 y 1.951 - 1.960, anotan los mayores valores con 190 y 197 días con lluvias respectivamente.
- La década con el menor promedio de días de lluvias fue 1.921 - 1.930 con una media de 173 días lluviosos.
- El año con el mayor número de días lluviosos fué 1.950 con 241 días con lluvias, le sigue 1.917 con 236 días lluviosos.
- El año con menos días con lluvias fué 1.926 con 120 días lluviosos seguido de 1.914 con 132 días.

Promedio 10/10 = 185
