# Supplementary material
Source: Copernicus journal article supplement (doi:10.5194/egusphere-2026-1317)
Supplement: Supplementary file [file 5 Pourrut_Leiva_1989.pdf › BilbiografiaEscaneada/5 Pourrut_Leiva_1989.pdf]

---

# LAS LLUVIAS DE QUITO: CARACTERISTICAS GENERALES, BENEFICIOS Y PROBLEMÁTICA

---

*Pierre Pourrut\**  
*Iván Leiva S.\*\**

“**E**n Quito llueve por barrios”. Dicha expresión popular se ve plasmada en la realidad: de Norte a Sur y de Este a Oeste existe una marcada heterogeneidad en la distribución de las precipitaciones y en los totales pluviométricos registrados, como si la ciudad capital fuera por sí sola una síntesis del mosaico tan amplio de los climas ecuatorianos. También lo demuestra la historia: el libro de Cabildos de Quito resulta ser, desde 1650, un curioso registro en cuyas actas se puede seguir la secuencia de años con condiciones climatológicas extremas, ya sea en lluvias o en sequías, por las numerosas ocasiones en que se pide la intercesión de las vírgenes del “buen tiempo”. Parece interesante transcribir en forma textual, las partes pertinentes de dos actas del Cabildo (1) :

*“ QUE SE TRAIGA EN PROCESION DE SU SANTUARIO A NUESTRA SEÑORA LA VIRGEN DE GUADALUPE Y SE CELEBRE NOVENARIO EN LA CATEDRAL, PARA IMPETRAR LAS LLUVIAS Y NO SE PIERDAN LAS SEMENTERAS.*

*En la Muy Noble y Muy Leal Ciudad de San Francisco de Quito, en treinta y un días del mes de Enero, año de mil seiscientos y cincuenta, el General Don Gonzalo Rodríguez de Monroy, Caballero del Orden de Alcántara, Corregidor de esta ciudad y los demás capitulares que abajo firmarán, se juntaron en su Cabildo y Ayuntamiento como lo han de uso y costumbres, y el Procurador General, a tratar de conferir cosas tocantes al servicio de Dios Nuestro Señor y bien de la República, en la manera siguiente:*

*Tratóse en este Cabildo sobre la esterilidad y sequedad del tiempo por haberse alzado las aguas y que para Dios Nuestro Señor sea servido de enviarlas y que fructifiquen los campos y no se pierdan las sementeras, es necesario valerse de la intercesión de la Virgen María, Nuestra Señora, en su imagen Santísima de Guadalupe, Patrona de esta Ciudad, por cuyo medio de ordinario y todas las veces que se le han hecho novenarios y validose esta Ciudad de su intercesión, se han experimentado muchos favores hechos a la República y sus vecinos por su medio e intercesión, consiguiendo lo que se la ha suplicado en la salud y buenos temporales. Y acudiendo a la fuente de tanta piedad en el caso presente, se acordó se traiga en procesión a esta Ciudad, de su Santuario de Guápulo y se le celebre novenario en la Santa Iglesia Catedral de ella con la mayor reverencia y devoción que pueda, y para ello se nombraron por Diputados a Antonio Freile y a don Gaspar Verdugo, Procurador General, los cuales den cuenta de ello a los señores Presidente y Oidores de esta Real Audiencia y al señor Obispo y Cabildo Eclesiástico y a las religiones para que acudan a la procesión”.*

---

\*Hidrólogo Orstom, miembro del Colegio de Geógrafos del Ecuador

\*\*Geólogo, Dirección Nacional Agrícola del Ministerio de Agricultura y Ganadería

**"QUE SE TRAIGA A LA IMAGEN DE NUESTRA SEÑORA DE GUADALUPE PARA OFRECERLE UN NOVENARIO EN LA CATEDRAL, A FIN DE QUE CESE LA SEQUIA**

Enero 24 1651

*En la ciudad de San Francisco de Quito, en veinte y cuatro días del mes de Enero de mil y seiscientos y cincuenta y un años, el General don Gonzalo Rodríguez de Monroy, Caballero del Orden de Alcántara, Corregidor de esta Ciudad y demás capitulares que abajo firmarán, se juntaron en su Cabildo y Ayuntamiento como lo han de uso y costumbre, a tratar y conferir cosas tocantes al servicio de Su Majestad y bien de la República, en la manera siguiente:*

*En este Cabildo se acordó unánime y conforme, se traiga a esta Ciudad la Santísima Imagen de Nuestra Señora de Guadalupe y que se le haga novenario en ella y en la Santa Iglesia Catedral, por la necesidad del pueblo y que Dios Nuestro Señor, por intercesión de su Santísima Madre, dé salud a sus vecinos que padecen hoy algunas enfermedades y envíe buenos temporales y la lluvia de que necesita la tierra para las sementeras y sustentos de los pobres, y que le den gracias por los innumerables favores que toda esta República ha recibido y recibe cada día de sus poderosas manos por el patronato de la dicha Santísima Imagen, Abogada y Patrona de esta Ciudad, y se nombran por Diputados a Lucas Viera y Gonzalo Vásquez Feijóo para que vayan a traer dicha Santísima Imagen y den cuenta de lo acordado por este Cabildo a Su Señoría el señor Presidente de esta Real Audiencia y al venerable Deán y Cabildo de esta Catedral, y el Mayordomo acuda con la cera que es costumbre para el recibimiento".*

La verdad es que Quito siempre prestó gran atención a todos los problemas relacionados con las aguas, tanto las de origen meteórico como las producidas por escurrimiento superficial o nacidas de un almacenamiento subterráneo y supo velar por el buen uso de sus recursos hídricos. Es así como es sumamente notable constatar que desde 1535, es decir poco después de la fundación de la ciudad de San Francisco de Quito, el Cabildo establecía ya las primeras normas orientadas a utilizar racionalmente y a preservar de la contaminación las aguas de los torrentes que descenden del volcán Pichincha o las de los lagos que, en esa época, existían aún en la cubeta urbana (2). Más tarde, hasta la primera mitad del siglo XIX, los recursos hídricos de la zona fueron administrados por diferentes órdenes religiosas que aseguraban la distribución con la ayuda de los representantes de diversos barrios, siendo los conflictos resueltos por un "Juez de Aguas", cargo que había sido creado en 1598.

Evidentemente, hoy en día, la realidad es algo diferente. Si bien es verdad que en relación con los decenios pasados se observa una idéntica o por lo menos parecida irregularidad pluviométrica, también es indudable que la ciudad sufre un acelerado proceso de accidentes de doble origen, geomorfológico y pluviométrico, cuyo costo social es cada vez mayor.

Es así como un análisis de los accidentes geomorfológicos urbanos (3), realizado en base a la prensa, revela no menos de 233 inundaciones y aluviones, es decir accidentes directamente ligados a las condiciones climáticas y más particularmente a las lluvias diarias y a sus intensidades.

---

## 1. MODO DE ACCION DE LAS LLUVIAS EN EL DESENCADENAMIENTO DE LOS PROCESOS EROSIVOS Y ACCIDENTES GEODINAMICOS (4)

Aunque no sea objeto de la presente comunicación, vale la pena presentar un breve compendio de los mecanismos más comunes que rigen la erosión hídrica, porque dichos procesos se desarrollan a lo largo y ancho de toda la estribación oriental del Pichincha y, por lo tanto, forman parte de los factores mayormente responsables de los accidentes ocurridos en la ciudad capital.

En términos generales, las aguas lluvia constituyen el punto clave de la erosión, no solamente por el efecto destructivo propio de cada evento pluviométrico, sino también porque condicionan la formación de las aguas superficiales y subterráneas.

### 1.1. Acción directa de los chaparrones y chubascos

Al entrar en contacto con el suelo, la magnitud de la acción de las gotas de lluvia es directamente proporcional a la cantidad de las mismas y a su fuerza de impacto, la que depende de su diámetro y de su velocidad de caída. Más concretamente, estas distintas variables son traducidas por la denominada "intensidad de la lluvia", es decir la altura pluviométrica que corresponde a un determinado intervalo, desde algunos minutos hasta varias horas, parámetro que suele medirse en milímetros por hora. En todo caso, existe una relación estrecha entre las intensidades registradas durante períodos cortos y el poder erosivo de las lluvias.

Cuando el impacto de las gotas es lo suficientemente fuerte, la textura del suelo es destruida: las partículas finas son desplazadas mientras los elementos más gruesos se aglomeran entre sí, lo que conduce a una nueva organización de las capas superficiales. Evidentemente, lo anterior implica la participación de factores propios del suelo, en particular su naturaleza (la cohesión es naturalmente menor en los suelos blandos, tipo polvos o arenas finas) y su estado inicial de humedad (que va aumentando paulatinamente en el transcurso de una misma lluvia).

### 1.2 Acción de las aguas superficiales

Después de caer, parte del agua procedente de las gotas de lluvia se acumula o se propaga a la superficie del suelo para producir un "escurrimiento difuso" constituido por una lámina de agua, sin mayor poder de arrastre aunque contenga partículas finas en suspensión. Sin embargo, en función del valor de las pendientes, de la densidad del manto herbáceo de cobertura y de la humedad previa de la capa superficial, el agua se reúne en distintos hilos de escurrimiento que, según su caudal y velocidad, son capaces de arrastrar partículas o

elementos aglomerados de un tamaño determinado. El escurrimiento difuso pasa a "concentrarse" en pequeños canales de conducción cuyas dimensiones van aumentando en dirección aguas abajo, escurriéndose sucesivamente en "cárnavas", "quebradillas" y "quebradas" y adquiriendo un poder erosivo cada vez mayor.

Es así como al desmantelarse la capa conformada por los elementos aglomerados al impacto de las gotas de lluvia, las aguas logran atacar las capas inferiores más blandas, acelerándose el fenómeno y propagándose de abajo hacia arriba según un proceso conocido como "erosión regresiva". Aguas abajo, los caudales que se escurren en quebradillas y quebradas confluyen en cauces de mayor tamaño y el flujo de crecida, así conformado, contribuye a destruir las orillas y terrazas del curso de agua.

De igual manera que en el caso de la degradación causada por el impacto directo de las gotas de lluvia, la erosión producida por el escurrimiento está íntimamente relacionada con la intensidad de las precipitaciones. En efecto, las lluvias sólo ocasionan un escurrimiento cuando las intensidades son superiores a la capacidad de absorción del terreno, en otras palabras, durante los picos de intensidad cuyo valor total corresponde a la lluvia "eficaz" efectivamente responsable del escurrimiento. Por esta razón, no existe una estrecha relación entre las alturas pluviométricas totales y las cantidades de terreno erosionadas por escurrimiento.

### 1.3. Acción de las aguas subterráneas

En la superficie o sub-superficie de algunas formaciones geológicas y suelos, merced al oxígeno del aire y al anhídrido carbónico procedente de las raíces de las plantas, el agua disuelve algunos minerales, tales como carbonatos o yeso, y actúa como un factor importante en los procesos de meteorización. Excepcionalmente, al disolver considerables cantidades de sales, puede llegar a producir grandes vacíos cuyo derrumbamiento se manifiesta por "embudos de disolución". Igualmente, un fuerte "escurrimiento hipodérmico" puede arrastrar paulatinamente las partículas finas del subsuelo, hasta conformar pequeños túneles que al desplomarse dan alineaciones de zonas hundidas cuya unión se traduce en la formación de una quebrada (fenómeno de "sufosión").

Por otra parte, en cierto tipo de material, particularmente en las formaciones arcillosas, las aguas lluvia pueden infiltrarse hasta cambiar radicalmente las características físicas de los terrenos, llegar a sus límites de plasticidad y fluidez, y de esta manera conformar grandes masas de tierra sin ninguna cohesión. También, merced a diferencias litológicas (como el contacto entre capa meteorizada y roca madre) o zonas más débiles (como fracturas o "roturas de desgarramiento"), las aguas pueden filtrarse y aprovechar estos caminos privilegiados hasta aislar totalmente grandes compartimientos. En ambos casos, una pendiente favorable y cualquier desequilibrio de origen natural (fuerte

pluviometría, temblor, etc.) o artificial (descarga del pie de la zona por tractores, sobrecarga de la cabeza con acumulación de material de terraplenes, etc.), pueden provocar deslizamientos de terreno de incalculables consecuencias.

Aún más, en ciertos casos, los deslizamientos pueden obstaculizar los cauces de ríos y torrentes, convirtiéndose en represas naturales. Cuando la carga hidráulica de las aguas de escurrimiento almacenadas supera los límites de resistencia de los tapones, éstos se destruyen y generan repentinos flujos de agua, lodo y materiales sólidos, conocidos como "aluviones" en la zona interandina.

Al contrario de las acciones producidas por las precipitaciones directas y por el escurrimiento, los movimientos en masa no tienen una relación estrecha con los picos de intensidades de las lluvias pero sí están vinculados con los totales pluviométricos registrados durante intervalos más largos.

## 2. NATURALEZA Y CAUSAS DE LOS PROBLEMAS ORIGINADOS POR LAS LLUVIAS

Los modos de acción de las aguas lluvia, brevemente expuestos en el párrafo anterior, dependen también estrechamente del entorno geográfico en el cual se desarrollan, de agentes naturales tales como las pendientes naturales o de factores artificiales como es el caso de los acondicionamientos hidráulicos y de las obras de saneamiento urbano.

Por encontrarse ubicada al pie del volcán Pichincha, Quito ha sufrido siempre las consecuencias de la actividad torrencial que se desarrolla periódicamente en invierno, entre los meses de noviembre y mayo.

Las aguas lluvia recogidas en la vertiente oriental del Pichincha se escurren por medio de varias decenas de quebradas para ser evacuadas a través de la ciudad, ya sea hacia el río Machángara o hacia el río Monjas. Es así como, en el pasado, numerosas zanjias amplias y profundas cruzaban la cubeta de Quito garantizando sin mayores problemas el óptimo tránsito de los caudales líquidos y de los aportes sólidos. Lamentablemente, el progresivo desarrollo de la ciudad determinó que se descarguen en ellas materiales y desechos varios. Las crecientes necesidades de saneamiento urbano requirieron la construcción en albañilería de colectores en el fondo del lecho de las quebradas y los rellenos realizados terminaron por eliminar en la superficie la huella de las antiguas zanjias. Así, las profundidades a las que se hallan los colectores en la actualidad son importantes (a veces superiores a 25 metros). Hay que anotar que dicho proceso de relleno continúa aún hoy en día.

Vale la pena mencionar el diagnóstico realizado en el año 1986 (5) :

"Desgraciadamente, las reducidas dimensiones de estos colectores, resultado probablemente en parte de las limitaciones económicas, parecen ser tanto más insuficientes (inclusive para sucesos de período de retorno corto, inferior a 10 años), cuanto que están encargados de evacuar además las aguas servidas y las aguas lluvia de la ciudad misma, cuyas población y superficie impermeabilizada se han incrementado considerablemente.

En época de crecidas, cuando los caudales superan los valores admitidos por los colectores enterrados, se produce un almacenamiento en los embalses creados por los terraplenes, produciéndose así un decrecimiento de los puntos pico de los hidrogramas; pero la capacidad en volumen de este almacenamiento a la entrada de los colectores es relativamente baja, al menos en el caso de algunas quebradas, de manera que crecidas importantes pueden provocar desbordamientos y, por lo tanto, inundaciones en los barrios expuestos.

Los riesgos de desbordamiento son tanto más altos cuanto que los diversos materiales transportados por las aguas (ramas, piedras, sedimentos, etc.) pueden obstruir fácilmente las entradas de los colectores y reducir así las capacidades de evacuación ya de por sí limitadas. El fenómeno de almacenamiento presenta sin embargo graves inconvenientes en lo que se refiere a los terraplenes, por una parte, y a la red enterrada, por otra.

Los estragos más importantes observados en la ciudad son en realidad las avalanchas de lodo cuya génesis ha sido descrita en el capítulo anterior. El almacenamiento que tiene lugar aguas arriba, cuando se producen fuertes precipitaciones posteriores, provocaría la ruptura de este tapón, dando origen a un flujo de lodo y piedras devastador."

Una acentuación de este fenómeno, durante el último decenio, y el agravamiento de sus consecuencias, se deberían esencialmente a perturbaciones artificiales, siendo las principales las siguientes:

- la explotación de canteras, de efectos nefastos, porque por una parte engendra un peligro de desestabilización de las laderas, y, por otra parte, se utilizan inapropiadamente en rellenos los materiales extraídos inutilizables, para la creación de espacios de trabajo o de almacenamiento, y de vías de acceso;

- la creación de vías y canales de irrigación en las pendientes pronunciadas sensibles a la erosión, que aumenta los riesgos de deslizamiento, creando además los accesos y por lo tanto las posibilidades de vertimiento de desechos;

- la supresión de la vegetación natural bien enraizada, para reemplazarla por praderas artificiales o plantaciones de eucalipto, que degradan significativamente la resistencia a la erosión superficial;

- el cultivo intensivo practicado en zonas inestables al borde de las quebradas;

- la extensión espontánea o inadecuadamente planificada de la urbanización, que provoca modificaciones dañinas de la topografía y del drenaje superficial, aumentando así los riesgos de desestabilización de las orillas de las quebradas.

La Empresa Municipal de Alcantarillado (EMA) ha emprendido, en los últimos años, la construcción de diferentes obras de corrección torrencial, en algunas quebradas. Se trata esencialmente de umbrales de altura reducida, implantados en el lecho de las quebradas y destinados, por una reducción de la pendiente, a disminuir la erosión del fondo del lecho.

Estas obras que se inscriben en el marco de acondicionamientos de “defensa activa” son, efectivamente, por lo general, las que conviene instalar al iniciar una acción de corrección torrencial. Sin embargo, ellas son relativamente poco eficaces en lo que concierne a la lucha contra los deslizamientos de terreno y contra la propagación de las corrientes de lodo.

Frente al importante problema planteado por la necesidad de mantener totalmente despejadas las entradas de los colectores que atraviesan la vía Occidental, la EMA ha procedido recientemente al acondicionamiento de algunas de estas entradas con una chimenea que comprende aperturas a algunos niveles. En caso de obstrucción de una apertura, el agua puede continuar su evacuación por la apertura de la cota superior.

Finalmente, la construcción del canal de derivación de la quebrada Yacupugru y de las dos quebradas vecinas situadas al Norte, hacia la quebrada San Isidro, se inscribe en el marco de una obra destinada a asegurar la evacuación correcta de las aguas por debajo de la vía Occidental y a evitar la repetición de las inundaciones observadas en 1983.

### 3. CARACTERISTICAS DE LAS LLUVIAS DE QUITO

Enmarcada entre los altos relieves occidentales del Pichincha y del Atacazo, por un lado, y las colinas orientales de Puengasí y Bellavista, por otro lado, y dándole como límites aproximados las poblaciones de Carcelén-Pusuquí al Norte y Guamaní al Sur, la ciudad de Quito s.s. se encuentra ubicada en una hoya conformada por las cuencas superiores de tres sistemas hidrográficos: el río Machángara, la quebrada del Batán (afluente del anterior con el que se reúne en Guápulo) y el río Monjas.

Globalmente, la urbe se extiende en unos 30 km de longitud mientras que ocupa un ancho que no supera los 8 km; su

llanura central se sitúa a una altitud algo inferior a 2800 m. s.n.m. pero, en algunas zonas, sus barrios periféricos ocupan las faldas inferiores del Pichincha hasta una altura cercana a los 3200 m.s.n.m.

Las condiciones antes señaladas, en particular el factor altitudinal que varía entre 2450 m.s.n.m. (en Guápulo) y 4680 m.s.n.m. (cumbre del Pichincha), permiten distinguir dos grandes tipos de clima (6): el “clima ecuatorial mesotérmico semi-húmedo a húmedo” que reina en toda la parte baja y, por consiguiente, en la zona urbanizada, y el “clima ecuatorial de alta montaña” que se ubica sobre los 3200 m.s.n.m. Cabe recalcar que en el presente caso, el término “ecuatorial” no corresponde a su definición clásica (dos estaciones lluviosas producidas por el desplazamiento periódico del FIT hacia el hemisferio de verano) y que el régimen de lluvias observado generalmente en el callejón interandino, con sus dos episodios de lluvias entre febrero y mayo y en noviembre-diciembre, se debe a la influencia alterna de masas de aire de origen oceánico y amazónico. En efecto, los relieves importantes de las dos cordilleras desempeñan un papel fundamental ya que reciben el impacto directo de las masas de aire las mismas que, por enfriamiento adiabático, producen elevados totales pluviométricos en las vertientes exteriores; sólo una menor parte de aire húmedo logra penetrar en este sector y vientos de tipo foehn, muy secos, descienden hacia el callejón interandino.

Para poder estimar los valores alcanzados por los diferentes elementos climáticos, en particular por las precipitaciones, la hoya de Quito y sus alrededores está equipada con algunas estaciones climatológicas, siendo las principales las siguientes:

- la estación del Observatorio Astronómico de Quito, ubicada en 0°12'40" S y 78°30'00" W a una altitud de 2820 m.s.n.m.; es de primer orden y entró en funcionamiento el primero de enero de 1891 gracias a la iniciativa del Presidente García Moreno;

- la estación del Aeropuerto, perteneciente a la Dirección de Aviación Civil; es igualmente una estación de primer orden, ubicada en 0°08'24" S y 78°29'16" W a una altitud de 2810 m.s.n.m., que funciona desde el primero de enero de 1958;

- la estación de primer orden de Izobamba que pertenece al INAMHI; está ubicada en 0°21'45" S y 78°35'05" W a una altitud de 3060 m.s.n.m. y entró en funcionamiento el primero de febrero de 1962;

- la estación de Quito-Bodegas de Iñaquito, perteneciente también al INAMHI; esta estación de segundo orden está ubicada en 0°10'29" S y 78°28'55" W a una altitud de 2810 m.s.n.m.; funciona desde el primero de junio de 1975;

- la estación de las antenas HCJB que pertenece a la

Cuadro 1  
Quito : Lluvias anuales  
(en mm)

| TOTALES PLUVIOMETRICOS |                       |                     |                     |            |          |
|------------------------|-----------------------|---------------------|---------------------|------------|----------|
| Año                    | Quito<br>Observatorio | Quito<br>Aeropuerto | Bodegas<br>Iñaquito | Cotocollao | Izobamba |
| 1891                   | 1329,1                |                     |                     |            |          |
| 1892                   | 1429,5                |                     |                     |            |          |
| 1893                   | 1617,3                |                     |                     |            |          |
| 1894                   | 999,0                 |                     |                     |            |          |
| 1895                   | 928,6                 |                     |                     |            |          |
| 1896                   | 1222,1                |                     |                     |            |          |
| 1897                   | 1402,7                |                     |                     |            |          |
| 1898                   | 1425,1                |                     |                     |            |          |
| 1899                   | ---                   |                     |                     |            |          |
| 1900                   | ---                   |                     |                     |            |          |
| 1901                   | 1370,3                |                     |                     |            |          |
| 1902                   | 1137,0                |                     |                     |            |          |
| 1903                   | 1060,4                |                     |                     |            |          |
| 1904                   | 1246,9                |                     |                     |            |          |
| 1905                   | 1062,7                |                     |                     |            |          |
| 1906                   | 1022,5                |                     |                     |            |          |
| 1907                   | 1261,0                |                     |                     |            |          |
| 1908                   | 1429,8                |                     |                     |            |          |
| 1909                   | 1338,1                |                     |                     |            |          |
| 1910                   | 1160,7                |                     |                     |            |          |
| 1911                   | ---                   |                     |                     |            |          |
| 1912                   | 1107,9                |                     |                     |            |          |
| 1913                   | 1582,9                |                     |                     |            |          |
| 1914                   | 1020,9                |                     |                     |            |          |
| 1915                   | 1467,4                |                     |                     |            |          |
| 1916                   | 1367,5                |                     |                     |            |          |
| 1917                   | 1905,4                |                     |                     |            |          |
| 1918                   | 1371,6                |                     |                     |            |          |
| 1919                   | 1251,8                |                     |                     |            |          |
| 1920                   | 899,7                 |                     |                     |            |          |
| 1921                   | 1314,6                |                     |                     |            |          |
| 1922                   | 1004,9                |                     |                     |            |          |
| 1923                   | ---                   |                     |                     |            |          |
| 1924                   | 1279,2                |                     |                     |            |          |
| 1925                   | 1270,8                |                     |                     |            |          |
| 1926                   | 692,2                 |                     |                     |            |          |
| 1927                   | 1424,5                |                     |                     |            |          |
| 1928                   | 1489,5                |                     |                     |            |          |
| 1929                   | 1337,9                |                     |                     |            |          |
| 1930                   | 1180,8                |                     |                     |            |          |
| 1931                   | 1179,1                |                     |                     |            |          |
| 1932                   | 1467,4                |                     |                     |            |          |
| 1933                   | 1345,5                |                     |                     |            |          |
| 1934                   | 1515,3                |                     |                     |            |          |
| 1935                   | 1347,2                |                     |                     |            |          |
| 1936                   | 985,3                 |                     |                     |            |          |
| 1937                   | 1178,2                |                     |                     |            |          |
| 1938                   | 1405,1                |                     |                     |            |          |
| 1939                   | 1154,1                |                     |                     |            |          |
| 1940                   | 1057,3                |                     |                     |            |          |
| 1940                   | 1057,3                |                     |                     |            |          |
| 1941                   | 1087,1                |                     |                     |            |          |

  

| Año                    | Quito<br>Observatorio | Quito<br>Aeropuerto | Bodegas<br>Iñaquito | Cotocollao | Izobamba |
|------------------------|-----------------------|---------------------|---------------------|------------|----------|
| 1942                   | 1076,2                |                     |                     |            |          |
| 1943                   | 1536,7                |                     |                     |            |          |
| 1944                   | 1062,6                |                     |                     |            |          |
| 1945                   | 1080,9                |                     |                     |            |          |
| 1946                   | 986,7                 |                     |                     |            |          |
| 1947                   | 1259,3                |                     |                     |            |          |
| 1948                   | 1016,1                |                     |                     |            |          |
| 1949                   | 1153,2                |                     |                     |            |          |
| 1950                   | 1667,3                |                     |                     |            |          |
| 1951                   | 1470,1                |                     |                     |            |          |
| 1952                   | 1237,3                |                     |                     |            |          |
| 1953                   | 1654,2                |                     |                     |            |          |
| 1954                   | 1384,0                |                     |                     |            |          |
| 1955                   | 1354,4                |                     |                     |            |          |
| 1956                   | 1108,5                |                     |                     |            |          |
| 1957                   | 1184,7                |                     |                     |            |          |
| 1958                   | 1022,5                | 773,1               |                     |            |          |
| 1959                   | 1092,9                | 940,0               |                     |            |          |
| 1960                   | 889,9                 | 737,4               |                     |            |          |
| 1961                   | 1044,2                | 786,7               |                     |            |          |
| 1962                   | 1073,4                | 906,2               |                     |            | 1237,9   |
| 1963                   | 1264,9                | 874,2               |                     | 608,1      | 1437,7   |
| 1964                   | 1017,3                | 775,6               |                     | 733,3      | 1221,6   |
| 1965                   | 1277,4                | 1089,1              |                     | 983,2      | 1630,9   |
| 1966                   | 988,9                 | 917,8               |                     | 703,2      | 1235,5   |
| 1967                   | 905,1                 | 922,7               |                     | 627,8      | 1221,3   |
| 1968                   | 1259,1                | 937,7               |                     | 862,6      | 1255,4   |
| 1969                   | 1366,3                | 1113,0              |                     | 893,0      | 1718,3   |
| 1970                   | 1174,6                | 1002,3              |                     | ---        | 1595,2   |
| 1971                   | 1452,8                | 1365,9              |                     | 1191,9     | 1795,2   |
| 1972                   | 1407,5                | 1236,6              |                     | 940,2      | 1516,8   |
| 1973                   | 1082,7                | 824,6               |                     | 600,5      | 1405,7   |
| 1974                   | 1272,1                | 1108,4              |                     | 746,3      | 1706,3   |
| 1975                   | 1548,6                | 1323,5              | 1346,5              | ---        | 1733,5   |
| 1976                   | 1041,5                | 865,4               | 914,6               | 685,4      | 1346,8   |
| 1977                   | 922,4                 | 814,3               | 841,3               | 702,4      | 1166,6   |
| 1978                   | 1016,0                | 742,3               | 812,5               | 593,6      | 1158,8   |
| 1979                   | 926,3                 | 772,0               | 924,1               | 694,7      | 1115,0   |
| 1980                   | 1113,5                | 880,5               | 990,4               | 628,4      | 1185,7   |
| 1981                   | 1173,4                | 916,5               | 945,0               | 573,6      | 1566,8   |
| 1982                   | 1643,9                | 1370,0              | 1290,8              | 1234,2     | 1780,0   |
| 1983                   | 1543,6                | 1155,2              | 1237,3              | 881,3      | 1556,7   |
| 1984                   | 1390,4                | 1106,7              | 1191,3              | ---        | 1806,1   |
| 1985                   | 880,7                 |                     | ---                 |            | 991,2    |
| 1986                   | 1323,8                |                     | 927,2               |            | 1420,6   |
| 1987                   | 890,2                 |                     | 759,8               |            | 996,6    |
| 1988                   | 1284,7                |                     | 1253,0              |            | 1779,5   |
| MEDIA<br>observada     | 1231,0                | 956,0               | 1033,0              | 749,0      | 1428,0   |
| MEDIA<br>homogeneizada | 1231,0                | 1019,0              | 1049,0              | 784,0      | 1470,0   |

Fuentes : Observatorio de Quito, Dirección de Aviación Civil,  
Instituto Nacional de Meteorología e Hidrología INAMHI



Empresa Municipal de Agua Potable de Quito (EMAP-Q); esta estación fue creada el primero de agosto de 1981 con el propósito de medir los factores condicionantes de la evaporación y evapotranspiración; está ubicada en 0°09'50" S y 78°31'24" W, a una altitud de 3900 m.s.n.m.

Además el INAMHI y el INERHI siguen manteniendo una red adicional de 12 pluviómetros y pluviógrafos y cabe también señalar que, entre 1981 y 1985, un proyecto de estudio de la hondonada de Quito, llevado a cabo por EMAP-Q - PRONAREG - ORSTOM, completó en 47 aparatos el sistema de observaciones pluviométricas.

Por lo expuesto en la breve reseña climática que aparece al inicio de este capítulo, se evidencia el papel primordial desempeñado por el volcán Pichincha en la distribución de las lluvias a lo largo del eje norte-sur de Quito. Es así como, frente al ingreso de las masas de aire pacífico procedentes del Sur-oeste, el Pichincha se eleva como una pantalla que protege la parte septentrional de la ciudad, traducéndose su influencia en una disminución importante de las lluvias.

Los totales pluviométricos registrados anualmente en diferentes sectores de la ciudad (Cuadro 1) constituyen una ilustración concreta de la heterogeneidad de la pluviosidad, al igual que las isoyetas que se presentan en la fig. 1: de Norte a Sur, el gradiente latitudinal alcanza valores sumamente elevados, hasta llegar a 50 mm por kilómetro.

Por otro lado, a lo largo de las estribaciones, existe también un gradiente pluviométrico relacionado con la altitud. Evidentemente, las relaciones entre la pluviometría anual P y la altura Z varían según el lugar y la exposición de las vertientes pero, al nivel que corresponde al centro de la ciudad, por el sector entre Ñaquito y las antenas HCJB, se estableció la siguiente relación:

$$P \text{ (en mm)} = -253 + 0,41 Z \text{ (en m)}$$

Una vez homogeneizadas las diferentes series en relación al período de observaciones más largo, el de Quito-Observa-

| ESTACIONES   | FRECUENCIAS |        |      |      |      |        |        |
|--------------|-------------|--------|------|------|------|--------|--------|
|              | 0,99        | 0,98   | 0,90 | 0,50 | 0,10 | 0,02   | 0,01   |
| Cotacollao   | (500)       | (535)  | 614  | 773  | 966  | (1100) | (1155) |
| Aeropuerto   | (630)       | 670    | 783  | 1005 | 1275 | 1470   | (1540) |
| Bodegas      | (715)       | (745)  | 845  | 1037 | 1267 | (1430) | (1485) |
| Observatorio | 775         | 820    | 950  | 1200 | 1500 | 1710   | 1785   |
| Izobamba     | (1000)      | (1050) | 1190 | 1456 | 1767 | (1980) | (2060) |

Nota : Los valores (...) son extrapolaciones

Cuadro 2

torio, se han realizado diversos análisis estadísticos de las lluvias anuales (7). A partir de la ley estadística que daba el mejor ajuste (generalmente la de Galton o de Pearson III) se han calculado los valores para diferentes frecuencias: F = 0,99 (altura pluviométrica de frecuencia centenal seca); F = 0,98 (cincuentenal seca); F = 0,90 (decenal seca); F = 0,50 (frecuencia mediana); F = 0,10 (decenal húmeda); F = 0,02 (cincuentenal húmeda) y F = 0,01 (centenal húmeda) (cuadro 2).

Tal como lo ilustra el histograma de la fig. 1, la variación de las precipitaciones mensuales sigue el régimen ecuatorial de lluvias, con dos estaciones secas ubicadas entre junio y septiembre y en diciembre-enero (menos marcada y conocida localmente como "veranillo del Niño"). Los meses más lluviosos son abril y marzo, en orden de importancia, mientras que los meses más deficitarios son julio y agosto. Siendo las distribuciones bastante semejantes de una estación a otra, se presentan en el cuadro 3 únicamente las alturas mensuales de Quito-Observatorio y de Izobamba.

En cuanto a las lluvias diarias (con un total recogido mayor a 0,1 mm), su número anual varía también de Norte a Sur: 160 días de lluvia, por año, en Cotacollao; 190 en El Ejido (Quito-Observatorio); y 220 en Izobamba. En comparación a otras regiones del país, los totales recogidos en un solo día no alcanzan valores muy fuertes, lo que es una característica en toda la región andina.

Es así como en el parque de El Ejido, la lluvia diaria más fuerte, observada habitualmente durante un año normal, apenas alcanza 40 mm; el valor decenal es de 52 mm y el

| ESTACIONES   | E   | F   | M   | A   | M   | J  | J  | A  | S  | O   | N   | D   | Año  |
|--------------|-----|-----|-----|-----|-----|----|----|----|----|-----|-----|-----|------|
| Observatorio | 115 | 129 | 154 | 180 | 127 | 48 | 20 | 26 | 82 | 132 | 114 | 104 | 1231 |
| Izobamba     | 127 | 168 | 185 | 190 | 140 | 80 | 32 | 41 | 89 | 146 | 147 | 125 | 1470 |

Cuadro 3

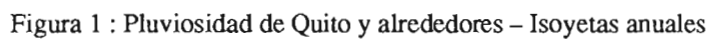



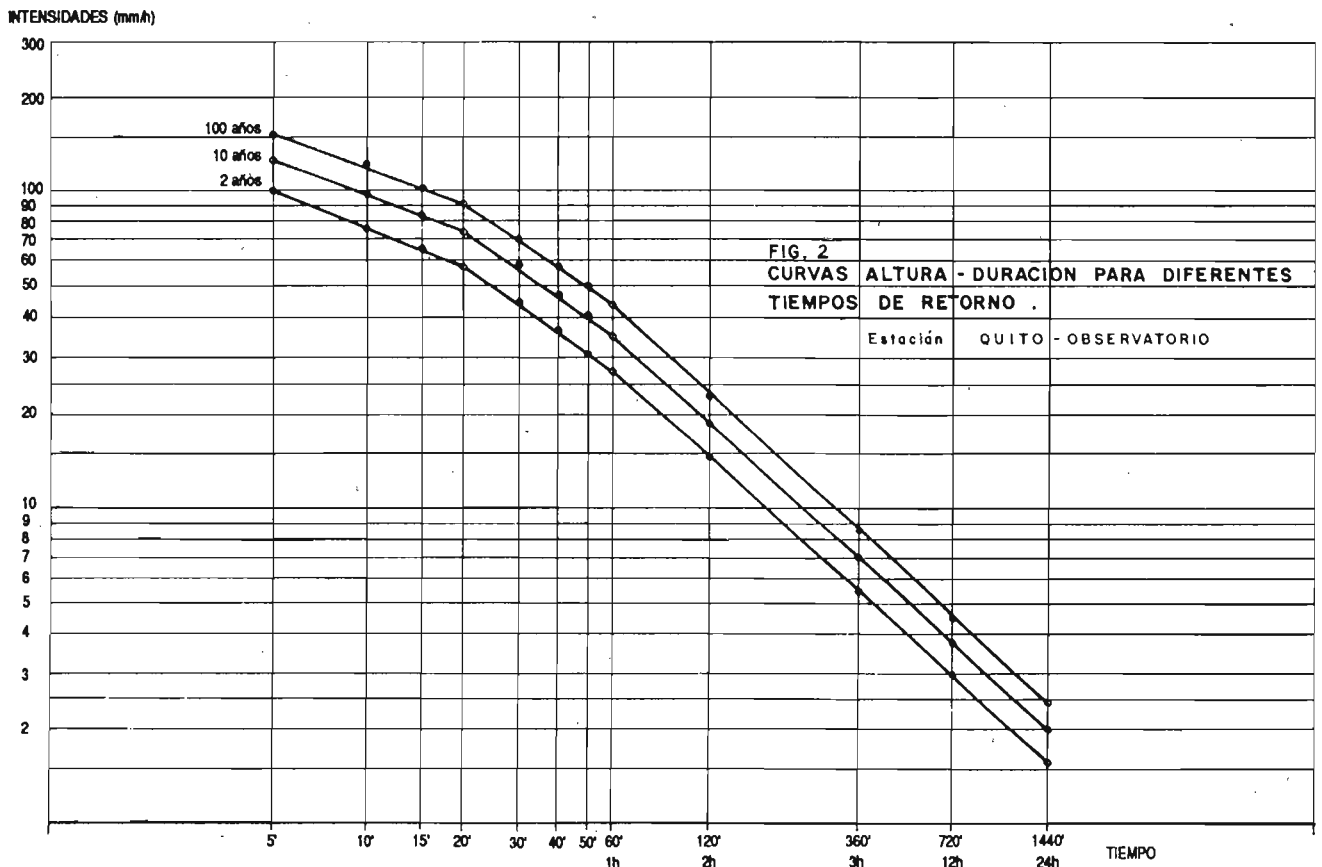

valor centenal de 68 mm. De igual manera, la fuerza de los chubascos, es decir su intensidad, es relativamente moderada: como valores promedio anuales, se registran 8,3 mm durante 5 min.; 23,2 mm en 30 min. y 27,4 mm en una hora. Los valores que se han estimado, con frecuencia centenal, son: 12,5 mm en 5 min., 34,6 mm en 30 min. y 42,5 mm en una hora. Para obtener información detallada, consúltese la fig. 2.

Además de estas consideraciones estadísticas que conforman el marco pluviométrico general de la ciudad, deben tomarse en cuenta circunstancias particulares que concurren para generar períodos excepcionalmente húmedos o secos. Entre otras condiciones, se considera generalmente que el fenómeno del Niño es una de las causas principales del incremento de las lluvias en el callejón interandino en general y en Quito en particular. Esta afirmación debe ser tomada con cautela. En efecto, en el caso del fuerte Niño 1982-83 por ejemplo, la pluviosidad registrada en el corredor interandino fue globalmente superior a la normal. Pero es difícil establecer una correspondencia directa entre el Niño y el aumento de las precipitaciones, ya que este último es generalmente del orden de 20 a 30% pero excepcionalmente llega a ser nulo (en raras ocasiones existe un déficit) o alcanza 400%. Por consiguiente, al parecer, la influencia del Niño no se traduce en la invasión de masas de aire húmedo, sino más bien en el incremento de la actividad convectiva que responde a patrones estrictamente locales y bastante aleatorios. En Quito, durante el período octubre 1982-septiembre 1983, se observaron, en la estación Quito-Obs-

vatorio de El Ejido, 219 días de lluvia, es decir 29 días más que el número mediano, con un total de 1780 mm (1677 mm de octubre a mayo) lo que corresponde a un período de retorno de 100 años. El Cuadro 4 permite también tener una buena idea de la rareza del evento a través de una estimación del rango y del tiempo de retorno de algunos valores mensuales y del período octubre-mayo.

Por el contrario, no se observaron valores excepcionales de precipitaciones diarias ni tampoco de intensidades, las mismas que se sitúan alrededor de los valores normales.

Otro aspecto que es interesante demostrar es la posible tendencia climática al incremento o a la disminución de la pluviometría, tal como lo aseguran algunos individuos, desde un punto de vista muy personal. Para poner de relieve esta posible evolución, se ha procedido a un análisis de las series de observaciones mediante medias móviles calculadas para 5 años. Dicho análisis (véase fig. 3) evidencia lo que podríamos llamar una "seudo-ciclicidad", con picos centrados en los años 1899, 1916, 1933, 1952 y 1970, es decir con intervalos muy similares que varían entre 17 y 19 años. Por otra parte, la serie muestra una muy ligera tendencia a una reducción de la pluviosidad de aproximadamente 1,3 mm por año:

$$P \text{ (en mm)} = 1287 - 1,3 t$$

siendo  $t$  el número de años desde el inicio de las observaciones, en 1891.

CUADRO 4 : QUITO-Observatorio: Algunos v alores pluviométricos característicos

| PERIODO               | VALORES MAXIMOS EN mm OBSERVADOS HASTA 1982<br>Y AÑOS DE OCURRENCIA   | 1982 - 1983 |       |                                 |
|-----------------------|-----------------------------------------------------------------------|-------------|-------|---------------------------------|
|                       |                                                                       | VALOR       | RANGO | TIEMPO DE<br>RETORNO<br>EN AÑOS |
| Octubre               | 310,6 (1893) - 282,9 (1897) - 269,8 (1953) - 231,4 (1934)             | 209,8       | -     | -                               |
| Noviembre             | 254,2 (1965) - 249,3 (1913) - 233,9 (1893) - 229,2 (1953)             | 190,8       | -     | -                               |
| Diciembre             | 348,3 (1917) - 219,2 (1912) - 195,4 (1891) - 171,5 (1950)             | 272,6       | 2     | 100                             |
| Enero                 | 284,9 (1933) - 226,7 (1927) - 222,5 (1915) - 222,4 (1891)             | 163,0       | -     | -                               |
| Febrero               | 349,2 (1915) - 296,7 (1909) - 270,7 (1898) - 236,3 (1975)             | 94,6        | -     | -                               |
| Marzo                 | 280,4 (1971) - 278,5 (1934) - 275,5 (1918) - 264,7 (1922)             | 294,4       | 1     | 40                              |
| Abril                 | 309,9 (1917) - 292,7 (1957) - 290,9 (1973) - 285,1 (1969)             | 236,6       | -     | -                               |
| Mayo                  | 228,0 (1938) - 226,4 (1944) - 225,0 (1909) - 201,8 (1917)             | 215,6       | 4     | 25                              |
| TOTAL<br>Octubre-Mayo | 1640,4(1917-18) - 1430,2(1908-09) - 1366,1(1897-98) - 1360,2(1953-54) | 1677,4      | 1     | 250                             |

FIG. 3  
TENDENCIA Y FLUCTUACIONES PLUVIOMETRICAS  
Estación QUITO - OBSERVATORIO

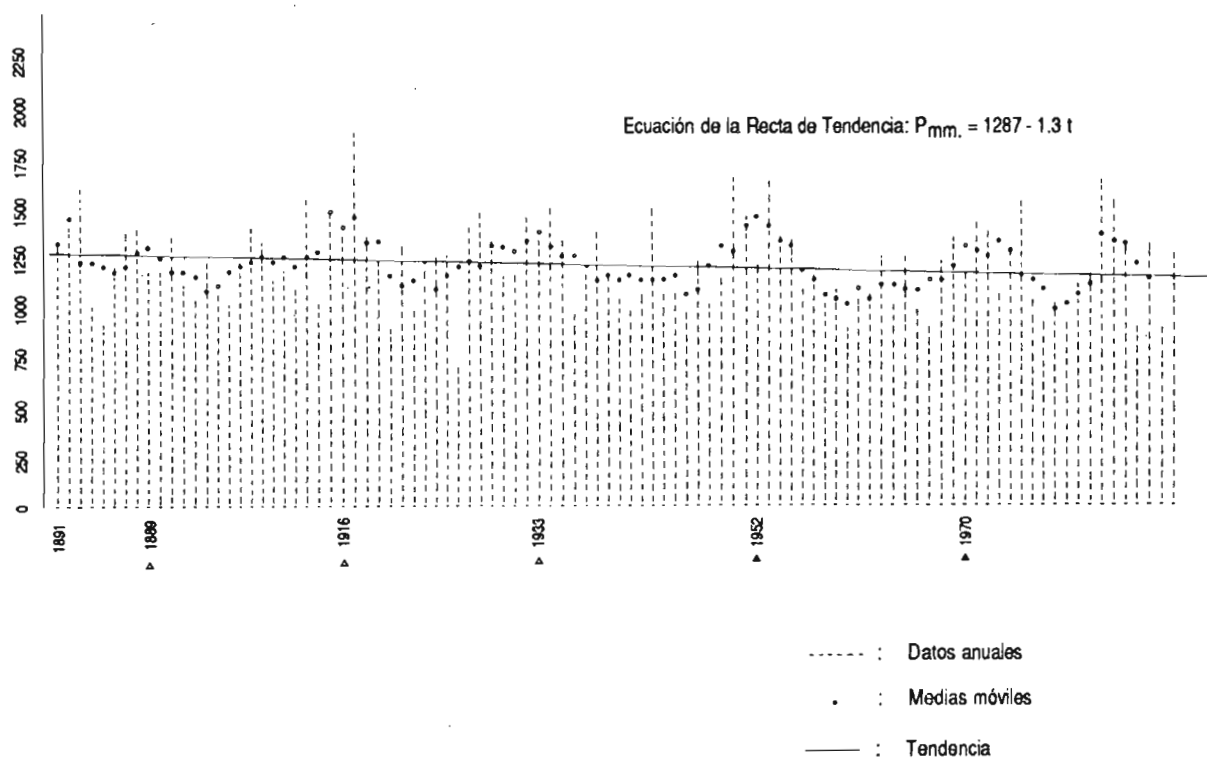

Nota: 4 años incompletos han sido rellenados con un valor de 1200 mm.

---

## CONCLUSIONES

---

En lo arriba presentado radican las principales características de la pluviometría de Quito y sus alrededores, entre las cuales debe destacarse su irregularidad. Esta no se refiere únicamente a su distribución en el tiempo sino también a su repartición en el espacio: el dicho con el que comenzamos el presente artículo, "en Quito llueve por barrios", debidamente comprobado por las observaciones científicas, se debe en gran parte a las condiciones topográficas del lugar que pueden generar un sinnúmero de casos específicos en cuanto a la actividad convectiva, la procedencia de las nubes, la dirección de los vientos, etc., produciéndose de esta manera aguaceros muy localizados.

Como primera observación, aunque parezca contradictorio, es indudable que en aquella heterogeneidad pluviométrica radica uno de los encantos de la ciudad: su luz tornasolada tan especial y, por qué no decirlo, hasta cierto punto uno puede escoger, entre Norte y Sur, dónde vivir en el clima que más le conviene. Además, las aguas lluvia resultado de las precipitaciones generan, en el sitio mismo de la hondonada sin tener que con altos costos ir a buscar a decenas de kilómetros, los flujos superficiales y las reservas subterráneas que aún hoy en día proporcionan al ciudadano la mayor parte del líquido vital que requiere.

Pero es de subrayar el carácter sumamente frágil del ecosistema en que se desarrollan los diferentes elementos del ciclo del agua: es prueba de gran sabiduría el trato casi cariñoso que las distintas autoridades y el mismo pueblo quiteño siempre dieron al recurso hídrico. Desafortunadamente, tal vez por el acelerado proceso de la vida moderna en el que nos encontramos todos involucrados, o quizás por la necesaria lucha por la supervivencia de la gente humilde de los barrios marginales, parece, cada día con mayor claridad, que ha caído en el olvido la tradición de un buen manejo del agua.

Es así como las importantes migraciones del sector rural hacia la ciudad, que son parte de la fuerte elevación de la tasa de crecimiento poblacional urbano, han producido situacio-

nes nuevas que han desencadenado una serie de procesos naturales y de medidas urgentes para contrarrestarlos muchas veces atentatorias contra los intereses de los ciudadanos, en lo que al buen manejo de las aguas se refiere. Entre muchas otras cosas, vale mencionar:

- la urbanización excesiva de la zona de piedemonte hasta los 3200 m.s.n.m., que es la única faja en que las condiciones geológicas son propicias para la infiltración de las aguas lluvia; produce una creciente impermeabilización que aumenta en importantes proporciones los escurrimientos superficiales en perjuicio de la infiltración, lo que acarrea una sustancial disminución en la alimentación de las napas acuíferas actualmente explotadas para el suministro de agua potable a la ciudad;

- la construcción de casas e incluso edificios en pleno cauce de las quebradas, hayan sido éstos rellenados o no; detrás de dichos tapones artificiales la acumulación de grandes volúmenes de agua puede generar aluviones de consideración;

- la tala indiscriminada del bosque protector en las estribaciones del Pichincha para instalar, en forma anárquica, viviendas desprovistas de los más esenciales servicios, determina un notable incremento de la erosión y es factor de contaminación hídrica;

- la ya mencionada inadecuación de las obras de corrección torrencial o de los sistemas de evacuación se traduce en la sobrecarga de los colectores, la peligrosa acumulación de agua a la entrada de los sistemas, los hundimientos y las inundaciones.

He aquí el esbozo de la problemática generada por las aguas lluvia. Más allá de una descripción general o de un análisis de las precipitaciones, otro de sus afanes es el de participar sus inquietudes, tanto a las más altas autoridades responsables como al más humilde ciudadano quiteño. A pesar de los errores hasta hoy cometidos, que todos sabemos que son humanos, no se ha producido aún ningún proceso natural irreversible; pero pongamos mucha atención: si se quiere conservar la alta calidad de vida de la ciudad capital, es tarea de cada uno de sus habitantes el cuidar, proteger y conservar celosamente sus aguas.

---

## NOTAS

- (1) NARANJO, P. - 1981 - "El clima del Ecuador" - Edición Casa de la Cultura Ecuatoriana - Quito.  
TERAN, F. - 1966 - "Geografía del Ecuador" - 7a. edición - Editorial Colón, Quito.
- (2) BAQUERO, O. - 1986 - : "Problemas de abastecimiento de agua potable para Quito" - comunicación inédita para el programa A.I.Q.
- (3) Ver cuadro 4 en : PELTRE, P. - 1989 - "Quebradas y riesgos naturales en Quito, período 1900-1988", a continuación en esta misma publicación.
- (4) POURRUT, P. - 1986 - "Papel de las precipitaciones en la degradación de los suelos: impacto de las lluvias excepcionales del período 1982-83". en : Documentos de investigación N° 6 "La erosión en el Ecuador", CEDIG, Quito.
- (5) IEOS-Coyne et Bellier - 1986 - "Estudio de las soluciones destinadas a eliminar los daños y perjuicios causados por las aguas pluviales en el sector occidental de la ciudad de Quito".
- (6) POURRUT, P. - 1983 - "Los climas del Ecuador, fundamentos explicativos". en : Documentos de investigación N° 4 "Los climas del Ecuador", CEDIG, Quito.
- (7) EMAP-Q, PRONAREG, ORSTOM - 1985 - "Acuífero de Quito - Informe Final".  
NOUVELOT, J.F. - 1984 - "Normas pluviométricas propuestas para el Ecuador" - PRONAREG/ORSTOM.
-
